# Supplementary material for: Alpha-glucans from bacterial necromass indicate an intra-population loop within the marine carbon cycle
Source: Research Square preprint supplement (doi:10.21203/rs.3.rs-3205445/v1), 2023-08-14
Supplement: Supplementary file 1 [file 6255c8d30f41f8fd45a39aaa.xlsx]

## Sheet: 2020 3 μm
tax#	class	order	family	genus	species	2020-03-02	2020-03-03	2020-03-04	2020-03-05	2020-03-06	2020-03-09	2020-03-10	2020-03-11	2020-03-16	2020-03-17	2020-03-18	2020-03-19	2020-03-20	2020-03-23	2020-03-24	2020-03-25	2020-03-26	2020-03-27	2020-03-30	2020-03-31	2020-04-01	2020-04-02	2020-04-03	2020-04-06	2020-04-07	2020-04-08	2020-04-09	2020-04-14	2020-04-15	2020-04-16	2020-04-17	2020-04-20	2020-04-21	2020-04-22	2020-04-23	2020-04-24	2020-04-27	2020-04-28	2020-04-29	2020-04-30	2020-05-04	2020-05-05	2020-05-06	2020-05-07
X1834	Acantharea	Acantharea_X	Acantharea_XX	Acantharea_XXX	Acantharea_XXX_sp.	0	0	1	0	5	1	2	2	2	1	1	0	0	0	0	2	7	2	0	0	2	1	0	0	1	1	6	1	0	2	1	0	0	0	0	0	0	0	0	0	0	0	1	0
X2136	Acantharea	Acantharea_X	Acantharea_XX	Acantharea_XXX	Acantharea_XXX_sp.	0	1	0	2	0	0	0	0	0	1	0	0	1	0	1	0	1	1	0	0	0	0	0	0	0	0	1	0	0	1	0	0	0	0	0	0	2	0	1	0	0	0	0	0
X2639	Acantharea	Acantharea_X	Acantharea_XX	Acantharea_XXX	Acantharea_XXX_sp.	0	0	0	0	0	3	0	1	0	0	0	3	0	3	3	1	3	1	0	0	0	0	0	0	5	3	4	3	0	1	0	0	0	0	0	0	0	0	0	0	0	0	0	0
X2837	Acantharea	Acantharea_X	Acantharea_XX	Acantharea_XXX	Acantharea_XXX_sp.	0	0	0	1	0	1	0	0	0	0	0	0	0	0	0	0	0	0	0	0	0	0	0	0	0	0	0	1	1	2	0	0	0	0	0	0	1	0	0	0	0	0	0	0
X730	Acantharea	Acantharea_X	Acantharea_XX	Acantharea_XXX	Acantharea_XXX_sp.	2	3	0	0	4	1	2	2	0	2	1	0	6	2	1	2	5	4	11	0	0	7	0	47	37	24	19	75	12	42	27	9	0	9	3	4	2	2	0	4	3	3	2	1
X3979	Acantharea	Acantharea-Group-I	Acantharea-Group-I_X	Acantharea-Group-I_XX	Acantharea-Group-I_XX_sp.	0	0	2	0	0	0	0	0	0	0	3	0	0	0	0	0	0	1	1	0	0	0	0	0	0	0	0	0	0	0	0	0	0	0	0	0	0	0	0	0	0	0	0	0
X3278	Annelida	Annelida_X	Annelida_XX	Aphrodita	Aphrodita_sp.	0	0	0	1	0	0	4	6	0	2	0	0	0	0	0	0	0	0	0	0	0	0	0	0	0	0	0	0	0	0	0	0	0	0	0	0	0	0	0	0	0	0	0	0
X3953	Annelida	Annelida_X	Annelida_XX	Arenicola	Arenicola_marina	4	0	0	0	0	0	0	0	0	0	0	0	0	0	0	0	0	0	0	0	0	0	0	0	0	0	0	0	0	0	0	0	0	0	0	0	0	0	0	0	0	0	0	0
X1062	Annelida	Annelida_X	Annelida_XX	Aurospio	NA	0	0	0	0	0	0	0	0	0	0	0	0	0	0	0	0	0	0	0	0	0	0	0	0	0	0	0	0	0	1	0	0	0	0	0	0	0	0	0	0	0	4	1	0
X1114	Annelida	Annelida_X	Annelida_XX	Aurospio	Aurospio_dibranchiata	0	0	0	0	5	1	0	8	0	0	0	0	0	0	0	0	1	0	1	0	0	0	1	0	0	0	0	1	0	0	0	0	0	0	0	0	0	0	0	0	0	27	0	0
X2172	Annelida	Annelida_X	Annelida_XX	Aurospio	NA	0	0	0	0	0	0	0	0	0	0	0	0	0	0	0	0	0	0	0	0	0	0	0	0	0	0	0	0	0	0	0	0	0	0	0	0	0	0	0	0	0	0	0	0
X233	Annelida	Annelida_X	Annelida_XX	Aurospio	Aurospio_dibranchiata	5	0	0	1	2	4	3	1	0	0	0	0	18	126	11	4	18	14	6	0	4	1	0	3	4	10	88	0	15	21	14	0	0	0	30	0	0	13	0	7	0	171	11	9
X1429	Annelida	Annelida_X	Annelida_XX	Boccardia	Boccardia_proboscidea	0	0	0	0	0	0	1	4	0	0	0	0	0	0	0	0	1	0	0	0	0	0	0	0	0	0	0	2	0	0	0	0	0	0	1	1	0	0	0	3	0	2	0	0
X1001	Annelida	Annelida_X	Annelida_XX	Capitella	Capitella_capitata	0	0	0	0	0	0	0	0	0	0	0	0	0	0	0	0	0	0	0	0	0	0	0	0	0	0	0	0	0	0	0	0	0	0	0	0	0	0	0	0	0	0	0	0
X3234	Annelida	Annelida_X	Annelida_XX	Capitella	NA	0	0	0	0	0	0	0	0	0	1	0	0	0	0	0	0	0	0	0	0	0	0	0	0	0	0	0	0	2	0	1	0	0	0	0	0	0	0	0	0	0	0	0	0
X772	Annelida	Annelida_X	Annelida_XX	Chaetopterus	Chaetopterus_pugaporcinus	0	0	0	0	0	0	0	0	0	0	0	0	0	0	0	1	5	0	0	0	0	0	0	0	0	0	0	0	0	0	4	5	0	6	0	15	0	0	0	0	0	12	0	20
X1223	Annelida	Annelida_X	Annelida_XX	Echiurus	Echiurus_echiurus	13	30	6	11	1	20	4	3	0	17	0	0	0	0	3	13	0	0	0	0	0	0	0	0	0	0	0	0	0	0	0	0	0	0	0	0	0	0	0	0	0	0	0	0
X2922	Annelida	Annelida_X	Annelida_XX	Eteone	NA	0	0	0	0	0	0	0	0	0	0	0	0	0	1	0	0	0	0	15	0	0	0	0	0	0	0	0	0	0	0	0	0	0	0	0	0	0	0	0	0	0	0	0	0
X376	Annelida	Annelida_X	Annelida_XX	Eteone	Eteone_longa	17	11	159	58	17	27	0	0	0	0	65	26	12	5	0	0	0	0	6	0	4	1	0	0	0	0	0	0	10	1	0	0	0	0	11	0	0	0	0	0	3	0	0	0
X134	Annelida	Annelida_X	Annelida_XX	Eulalia	Eulalia_viridis	11	10	5	8	31	3	11	9	1	9	37	3	130	16	9	18	12	368	18	1	1	1	1	2	5	0	2	7	23	7	3	10	0	2	2	0	1	8	11	37	6	213	31	21
X1411	Annelida	Annelida_X	Annelida_XX	Eumida	Eumida_bahusiensis	0	0	0	0	0	0	0	0	0	0	0	0	0	0	0	0	0	9	0	0	0	0	0	0	2	0	0	0	0	0	0	0	0	0	0	0	0	0	0	0	0	0	0	0
X1807	Annelida	Annelida_X	Annelida_XX	Eumida	NA	0	0	0	1	0	0	0	0	0	0	0	0	0	0	0	0	2	16	0	0	0	1	0	0	0	0	0	0	0	1	0	0	0	0	0	0	0	0	0	0	0	0	0	0
X185	Annelida	Annelida_X	Annelida_XX	Eumida	Eumida_bahusiensis	0	0	0	1	0	0	0	0	0	4	1	0	6	0	1	4	16	234	1	0	0	3	0	33	14	0	11	0	0	4	1	1	0	0	0	0	1	0	0	1	0	1	0	6
X2546	Annelida	Annelida_X	Annelida_XX	Eumida	Eumida_ockelmanni	0	0	0	0	0	0	0	0	0	0	0	0	0	0	0	0	0	5	0	0	0	0	0	0	0	0	0	0	0	0	0	0	0	2	0	0	0	0	0	0	0	0	0	16
X3408	Annelida	Annelida_X	Annelida_XX	Eumida	NA	0	0	0	0	0	0	0	0	0	0	0	0	0	0	0	0	0	0	0	0	0	0	0	0	0	0	0	0	0	0	0	0	0	0	0	0	0	0	0	0	0	0	0	0
X2847	Annelida	Annelida_X	Annelida_XX	Eusyllis	Eusyllis_blomstrandi	0	0	0	0	0	0	0	1	0	0	0	0	0	0	0	0	0	10	0	0	0	0	0	0	0	0	2	0	0	0	0	0	0	1	1	3	0	0	0	0	0	0	0	0
X478	Annelida	Annelida_X	Annelida_XX	Eusyllis	Eusyllis_blomstrandi	12	5	7	8	4	2	3	22	1	0	0	0	0	0	0	0	0	262	0	0	0	0	0	0	2	2	32	0	0	0	0	0	0	9	24	62	0	0	0	0	0	0	0	1
X3472	Annelida	Annelida_X	Annelida_XX	Exogone	Exogone_naidina	0	0	0	0	0	0	0	0	0	0	0	0	0	0	0	0	0	0	0	0	0	0	0	0	0	0	0	0	0	0	0	0	0	0	0	0	0	0	0	0	0	1	0	0
X154	Annelida	Annelida_X	Annelida_XX	Glycera	Glycera_southeastatlantica	0	3	49	52	77	4	4	82	1	0	0	0	2	32	25	0	0	11	0	0	0	0	0	1	0	3	0	0	0	1	0	0	0	0	0	0	0	0	3	0	0	0	0	4
X1698	Annelida	Annelida_X	Annelida_XX	Glycera	NA	0	0	0	0	0	0	0	0	0	0	0	0	0	0	0	0	0	0	0	0	0	0	0	0	0	0	0	0	0	0	0	0	0	0	0	0	0	0	0	0	0	0	0	0
X2294	Annelida	Annelida_X	Annelida_XX	Glycera	NA	0	0	0	0	0	0	0	0	0	0	0	0	0	0	0	0	0	0	0	0	0	0	0	0	0	0	0	0	0	0	0	0	0	0	0	0	0	0	0	0	0	0	0	0
X4142	Annelida	Annelida_X	Annelida_XX	Glycinde	Glycinde_armigera	0	0	0	0	0	0	0	0	0	0	0	0	0	0	0	0	0	0	0	0	0	0	0	0	0	0	0	0	0	1	0	0	0	0	0	0	0	0	0	0	0	0	0	0
X969	Annelida	Annelida_X	Annelida_XX	Goniada	Goniada_maculata	0	0	1	81	26	1	2	1	0	0	0	0	0	2	1	0	0	1	0	0	0	1	0	0	1	0	0	0	0	0	11	0	0	0	0	0	0	0	0	0	0	0	0	0
X3539	Annelida	Annelida_X	Annelida_XX	Goniadella	Goniadella_bobrezkii	0	0	0	0	0	0	0	0	0	0	0	0	0	0	0	0	0	0	0	0	0	0	0	0	0	0	0	0	0	0	0	0	0	0	0	0	0	0	0	0	0	0	0	0
X2334	Annelida	Annelida_X	Annelida_XX	Gyptis	NA	0	0	0	0	0	0	0	0	0	0	0	0	1	0	1	0	0	0	0	0	0	19	2	0	0	0	0	0	2	0	3	0	0	0	0	0	0	0	8	3	0	0	0	0
X1068	Annelida	Annelida_X	Annelida_XX	Harmothoe	Harmothoe_oculinarium	4	2	3	1	10	6	0	0	0	1	4	1	4	3	0	5	0	7	0	0	0	0	0	0	0	0	0	0	0	0	0	0	0	2	0	0	0	0	0	0	0	0	0	0
X1306	Annelida	Annelida_X	Annelida_XX	Harmothoe	Harmothoe_imbricata	0	0	0	0	0	0	0	0	0	0	0	0	0	0	0	0	0	0	0	0	0	0	0	0	0	0	0	0	0	0	0	0	0	0	0	0	0	0	0	0	0	0	0	0
X1524	Annelida	Annelida_X	Annelida_XX	Harmothoe	Harmothoe_imbricata	0	3	0	0	0	0	0	0	0	0	0	0	0	0	0	0	0	0	0	0	1	0	0	0	0	0	0	0	0	0	0	0	0	0	0	0	0	0	1	1	0	0	0	0
X1542	Annelida	Annelida_X	Annelida_XX	Harmothoe	Harmothoe_imbricata	0	0	0	0	0	0	0	0	0	0	0	0	0	0	0	0	0	0	0	0	0	0	0	0	0	0	0	0	1	0	0	0	0	0	0	0	0	0	0	0	0	0	0	0
X1759	Annelida	Annelida_X	Annelida_XX	Harmothoe	Harmothoe_imbricata	0	0	0	0	0	0	0	0	0	0	0	0	0	0	1	0	0	0	0	0	0	0	0	0	0	0	0	0	1	0	0	0	0	0	0	0	0	0	0	0	1	0	0	0
X1781	Annelida	Annelida_X	Annelida_XX	Harmothoe	Harmothoe_imbricata	0	1	0	0	0	0	0	0	0	0	0	0	0	0	0	0	0	0	0	0	0	0	0	0	0	0	0	0	0	0	0	0	0	0	0	0	0	0	0	0	0	0	0	0
X1782	Annelida	Annelida_X	Annelida_XX	Harmothoe	Harmothoe_imbricata	0	0	0	0	0	1	0	0	0	0	0	0	0	0	0	0	0	1	0	0	0	0	0	0	0	0	0	0	0	0	0	0	0	0	1	0	0	0	1	0	0	0	0	0
X1861	Annelida	Annelida_X	Annelida_XX	Harmothoe	Harmothoe_imbricata	0	0	0	0	0	0	0	1	0	0	0	0	0	0	0	0	0	0	0	0	0	0	0	0	0	0	0	0	0	0	0	0	0	0	0	0	0	0	0	0	0	0	0	0
X206	Annelida	Annelida_X	Annelida_XX	Harmothoe	Harmothoe_imbricata	2	88	27	18	8	0	0	0	1	31	7	8	5	8	1	4	0	8	0	0	1	0	5	1	2	0	0	0	7	1	3	0	0	0	0	2	0	0	0	25	0	0	7	1
X2250	Annelida	Annelida_X	Annelida_XX	Harmothoe	Harmothoe_imbricata	0	0	0	0	0	0	0	0	0	0	0	0	0	0	0	0	0	0	0	1	0	0	0	0	0	0	0	0	0	0	0	0	0	0	0	0	0	0	0	0	0	0	0	0
X2681	Annelida	Annelida_X	Annelida_XX	Harmothoe	Harmothoe_imbricata	0	0	0	0	0	0	0	0	0	0	0	0	0	0	0	0	0	0	0	0	0	0	0	0	0	0	0	0	0	0	0	0	0	0	0	0	0	0	0	0	0	0	0	0
X2721	Annelida	Annelida_X	Annelida_XX	Harmothoe	Harmothoe_imbricata	0	0	0	0	0	0	0	0	0	0	0	0	0	0	0	0	0	0	0	0	0	0	0	0	0	0	0	0	0	0	0	0	0	0	0	0	0	0	0	0	0	0	0	0
X3002	Annelida	Annelida_X	Annelida_XX	Harmothoe	Harmothoe_imbricata	0	0	0	0	0	0	0	0	0	0	0	0	0	0	0	0	0	0	0	0	0	0	0	0	0	0	0	1	0	0	0	0	0	0	0	0	0	0	0	0	0	0	0	0
X4403	Annelida	Annelida_X	Annelida_XX	Harmothoe	Harmothoe_oculinarium	0	0	0	0	0	0	0	0	0	2	0	0	0	0	0	0	0	0	0	0	0	0	0	0	0	0	0	0	0	0	0	0	0	0	0	0	0	0	0	0	0	0	0	0
X574	Annelida	Annelida_X	Annelida_XX	Harmothoe	NA	0	0	1	1	0	2	5	1	2	4	1	2	0	5	0	0	3	23	5	0	0	1	0	1	0	0	0	25	11	2	3	0	0	1	0	0	0	3	20	13	2	4	3	0
X1066	Annelida	Annelida_X	Annelida_XX	Heteromastus	Heteromastus_filiformis	0	0	1	0	0	0	0	0	0	0	0	0	0	0	0	0	0	0	0	0	0	0	0	0	2	0	0	0	0	0	0	0	0	0	3	0	0	0	0	0	0	0	0	0
X2647	Annelida	Annelida_X	Annelida_XX	Lanice	Lanice_conchilega	0	0	0	0	0	0	0	0	0	0	0	0	0	0	0	0	0	0	0	0	0	0	0	0	0	0	0	0	0	0	0	0	0	0	0	0	0	0	0	0	0	0	0	0
X28	Annelida	Annelida_X	Annelida_XX	Lanice	Lanice_conchilega	11	8	18	149	318	18	5	13	13	1538	232	8	29	136	159	19	613	230	75	0	72	3	113	18	1	7	40	146	146	184	146	0	0	8	14	22	34	3	33	20	2	14	44	31
X1210	Annelida	Annelida_X	Annelida_XX	Lepidonotus	Lepidonotus_squamatus	0	0	0	0	0	0	0	1	0	0	0	0	0	0	0	0	0	0	0	0	0	0	0	0	0	0	0	0	0	0	0	0	0	0	0	0	0	0	0	0	0	0	0	0
X153	Annelida	Annelida_X	Annelida_XX	Lepidonotus	Lepidonotus_squamatus	5	2	11	8	10	18	45	155	0	9	1	0	0	1	6	39	28	27	6	0	0	0	0	3	0	0	0	0	2	0	15	3	0	0	0	0	0	0	0	0	0	0	0	0
X1607	Annelida	Annelida_X	Annelida_XX	Lepidonotus	Lepidonotus_squamatus	0	0	1	0	2	0	0	0	0	0	0	0	0	0	0	0	0	14	2	0	0	0	0	0	0	0	0	9	1	0	0	0	0	0	0	0	0	0	0	0	0	0	0	0
X261	Annelida	Annelida_X	Annelida_XX	Magelona	Magelona_mirabilis	0	0	0	0	0	0	0	0	0	0	0	0	2	0	0	0	0	0	5	0	0	0	10	0	0	0	0	792	38	29	15	0	0	16	0	0	1	0	0	382	4	29	19	47
X3156	Annelida	Annelida_X	Annelida_XX	Magelona	Magelona_mirabilis	0	0	0	0	0	0	0	0	0	0	0	0	0	0	0	0	0	0	0	0	0	0	0	0	0	0	0	3	0	0	0	0	0	1	0	0	0	0	0	0	0	2	0	0
X2058	Annelida	Annelida_X	Annelida_XX	Malacoceros	Malacoceros_fuliginosus	0	0	0	0	1	0	0	0	0	0	0	0	0	0	0	0	0	1	0	0	0	0	2	0	0	0	0	0	0	1	0	0	0	0	0	0	0	0	0	0	0	11	0	0
X251	Annelida	Annelida_X	Annelida_XX	Malacoceros	Malacoceros_fuliginosus	71	0	0	3	41	3	2	42	0	0	0	1	0	2	1	2	1	6	2	1	0	0	806	0	0	0	1	40	4	4	3	0	0	6	0	0	0	0	21	93	4	395	0	8
X2189	Annelida	Annelida_X	Annelida_XX	Marenzelleria	Marenzelleria_viridis	0	0	0	0	0	0	0	0	0	0	0	0	0	0	0	0	0	0	0	0	0	0	0	0	0	0	0	0	0	0	0	0	0	0	0	0	0	0	0	0	0	0	0	0
X239	Annelida	Annelida_X	Annelida_XX	Marenzelleria	Marenzelleria_arctia	0	0	0	0	0	0	0	0	0	0	0	0	0	0	0	0	0	0	0	0	0	0	0	0	0	0	0	0	0	0	0	0	0	0	0	0	0	0	0	0	0	0	0	0
X1064	Annelida	Annelida_X	Annelida_XX	NA	NA	0	0	1	0	2	0	0	0	0	4	0	0	0	2	0	6	1	0	0	2	1	0	1	0	0	0	2	4	1	0	4	0	0	1	9	0	9	0	1	16	0	1	3	7
X1208	Annelida	Annelida_X	Annelida_XX	NA	NA	0	0	1	0	0	2	0	0	0	0	0	0	0	0	0	0	0	0	0	0	0	0	0	0	0	0	0	45	0	0	3	0	0	1	2	0	1	0	3	1	7	1	12	22
X1220	Annelida	Annelida_X	Annelida_XX	NA	NA	0	0	0	1	0	0	0	0	0	0	0	0	0	0	0	0	2	0	1	0	26	1	0	2	0	0	1	0	2	0	4	6	0	0	0	1	0	0	0	0	0	0	0	2
X125	Annelida	Annelida_X	Annelida_XX	NA	NA	70	8	2	6	557	32	43	2368	3	2	3	0	3	18	10	98	23	819	2	0	0	0	137	0	1	0	32	21	0	5	8	0	0	10	0	0	0	0	1	0	0	29	0	0
X1255	Annelida	Annelida_X	Annelida_XX	NA	NA	0	0	0	0	0	0	0	0	0	0	0	0	0	0	0	0	0	0	0	3	0	0	0	0	0	0	0	0	0	0	0	0	0	1	0	1	0	0	0	0	0	3	2	1
X1344	Annelida	Annelida_X	Annelida_XX	NA	NA	0	0	5	0	0	0	0	11	0	0	0	0	0	26	0	0	0	0	23	0	0	0	0	0	0	0	0	0	5	0	0	0	0	0	0	38	0	0	8	7	0	0	0	0
X1371	Annelida	Annelida_X	Annelida_XX	NA	NA	1	0	0	0	0	3	0	0	0	0	0	0	0	0	0	0	0	0	0	0	0	0	0	0	0	0	0	10	1	0	3	0	0	0	3	1	1	0	1	1	4	0	10	18
X138	Annelida	Annelida_X	Annelida_XX	NA	NA	2	0	2	2	2	0	0	1	1	0	1	0	0	0	0	6	122	523	60	233	8	1	8	1	18	1	44	14	14	0	5	0	0	0	0	0	0	0	5	1	1	20	9	2
X1497	Annelida	Annelida_X	Annelida_XX	NA	NA	0	0	0	0	0	0	0	0	0	0	0	0	0	0	0	0	0	0	0	0	0	0	0	0	0	0	0	0	0	0	0	0	0	0	0	0	0	0	0	0	0	0	0	0
X1516	Annelida	Annelida_X	Annelida_XX	NA	NA	0	0	0	0	0	1	0	0	0	0	0	1	0	0	0	0	5	14	3	3	0	0	0	0	2	0	0	0	0	1	0	0	0	0	0	0	0	1	1	0	0	1	1	0
X1634	Annelida	Annelida_X	Annelida_XX	NA	NA	0	0	0	0	0	0	0	0	0	0	0	0	0	0	0	0	0	0	0	0	0	0	0	0	0	0	0	0	0	0	0	0	0	0	0	0	0	0	0	0	0	0	0	0
X1665	Annelida	Annelida_X	Annelida_XX	NA	NA	0	0	0	0	0	0	0	0	0	0	0	0	3	0	0	0	0	5	0	0	0	0	0	0	0	0	0	0	0	0	0	0	0	0	0	0	0	0	0	0	0	2	0	0
X1682	Annelida	Annelida_X	Annelida_XX	NA	NA	0	0	0	0	0	0	0	0	1	0	0	0	0	0	0	0	5	0	1	0	0	0	0	1	5	0	0	0	0	0	0	0	0	0	0	0	0	0	0	0	0	0	0	0
X1694	Annelida	Annelida_X	Annelida_XX	NA	NA	0	0	0	0	0	1	0	2	0	0	0	0	0	0	0	0	0	0	0	0	0	0	0	0	0	0	0	0	0	0	0	0	0	0	0	0	0	0	0	0	0	0	0	0
X1738	Annelida	Annelida_X	Annelida_XX	NA	NA	0	0	0	0	0	1	0	0	0	0	0	0	0	0	0	0	0	0	0	0	0	0	0	0	0	0	0	0	0	0	0	0	0	0	0	0	0	0	0	0	0	0	0	0
X1770	Annelida	Annelida_X	Annelida_XX	NA	NA	0	0	0	0	0	0	0	0	0	0	0	0	0	0	0	0	0	0	0	1	0	0	0	0	0	0	1	0	0	0	1	0	0	0	0	1	0	0	0	1	1	2	4	0
X2127	Annelida	Annelida_X	Annelida_XX	NA	NA	0	0	0	0	4	0	0	15	0	0	0	0	0	0	0	0	0	2	0	0	0	0	0	0	0	0	0	0	0	0	0	0	0	0	0	0	0	0	0	0	0	2	0	0
X217	Annelida	Annelida_X	Annelida_XX	NA	NA	0	0	0	2	1	4	0	8	0	16	0	0	0	1	2	2	0	2	1	0	0	0	6	0	0	0	1	26	8	0	0	0	0	5	0	0	0	0	2	0	0	738	2	14
X2185	Annelida	Annelida_X	Annelida_XX	NA	NA	0	0	0	0	0	0	0	6	0	0	0	0	0	0	0	0	0	0	7	0	0	0	0	0	0	0	0	0	0	0	0	0	0	0	0	38	0	0	1	0	0	0	0	0
X2214	Annelida	Annelida_X	Annelida_XX	NA	NA	0	0	0	0	0	0	0	0	0	0	0	0	0	0	0	0	0	0	0	0	0	0	0	0	0	0	0	0	0	0	0	0	0	0	0	0	0	0	0	0	0	0	0	0
X223	Annelida	Annelida_X	Annelida_XX	NA	NA	10	1	52	0	2	0	3	496	0	0	0	0	1	197	0	0	0	6	13	0	0	0	0	0	32	0	4	74	2	2	0	4	0	0	1	0	0	0	16	0	0	1	1	4
X2489	Annelida	Annelida_X	Annelida_XX	NA	NA	0	0	1	0	0	0	0	0	0	0	0	0	0	0	0	0	4	1	0	0	0	0	0	0	0	0	0	0	0	0	0	0	0	0	0	0	0	0	0	0	0	0	0	0
X2680	Annelida	Annelida_X	Annelida_XX	NA	NA	0	0	0	0	0	0	0	0	0	0	0	0	0	0	0	0	0	0	0	0	1	0	0	0	0	0	0	0	0	0	0	0	0	0	0	0	0	0	0	0	0	0	0	0
X3031	Annelida	Annelida_X	Annelida_XX	NA	NA	0	0	0	0	0	0	0	0	0	0	0	0	0	0	0	0	1	6	0	0	0	0	0	0	0	0	0	0	0	0	0	0	0	0	0	0	0	0	0	0	0	0	0	0
X3061	Annelida	Annelida_X	Annelida_XX	NA	NA	0	0	3	0	0	0	0	0	0	0	1	0	0	0	0	0	0	0	0	0	0	0	3	0	0	0	0	0	0	0	0	0	0	0	1	0	0	0	0	0	0	0	0	0
X3380	Annelida	Annelida_X	Annelida_XX	NA	NA	0	0	0	0	0	0	0	3	0	0	0	0	0	0	0	0	0	2	0	0	0	0	0	0	0	0	0	0	0	0	0	0	0	0	0	0	0	0	0	0	0	1	0	0
X3553	Annelida	Annelida_X	Annelida_XX	NA	NA	0	0	0	0	0	3	0	0	0	0	0	0	0	0	0	0	0	0	0	0	0	0	0	0	0	0	0	0	0	0	0	0	0	0	0	0	0	0	0	0	0	0	0	0
X3568	Annelida	Annelida_X	Annelida_XX	NA	NA	0	0	0	0	0	0	0	0	0	0	0	0	0	0	0	0	2	0	0	0	0	0	0	0	0	0	2	0	0	0	0	0	0	0	0	0	0	0	0	0	0	0	0	0
X3586	Annelida	Annelida_X	Annelida_XX	NA	NA	0	0	0	0	0	0	0	0	0	0	0	0	0	0	0	0	0	0	0	0	0	0	0	0	0	0	0	0	0	0	0	0	0	0	0	0	0	0	0	0	0	0	0	0
X3615	Annelida	Annelida_X	Annelida_XX	NA	NA	0	0	0	0	0	0	0	0	0	0	0	0	0	0	0	0	2	5	1	0	0	0	0	0	0	0	0	0	0	0	0	0	0	0	0	0	0	0	0	0	0	0	0	0
X4200	Annelida	Annelida_X	Annelida_XX	NA	NA	0	0	0	0	0	0	0	0	0	0	0	0	0	0	0	4	1	0	0	0	0	0	0	0	0	0	0	0	0	0	0	0	0	0	0	0	0	0	0	0	0	0	0	0
X4464	Annelida	Annelida_X	Annelida_XX	NA	NA	0	0	0	0	0	0	0	0	0	0	0	0	0	0	0	0	0	0	0	0	0	0	0	0	0	0	0	0	0	0	0	0	0	0	0	0	0	0	0	0	0	0	0	0
X448	Annelida	Annelida_X	Annelida_XX	NA	NA	0	0	0	0	0	0	0	0	0	0	0	0	0	366	0	0	0	27	0	0	0	0	2	2	0	1	0	0	40	0	0	8	0	0	0	0	0	0	1	0	0	0	66	0
X558	Annelida	Annelida_X	Annelida_XX	NA	NA	0	0	0	3	0	1	1	11	1	0	0	0	0	5	0	0	0	0	0	0	0	0	0	0	0	0	0	0	1	0	0	0	0	0	0	0	0	0	0	0	0	1	0	0
X66	Annelida	Annelida_X	Annelida_XX	NA	NA	0	0	0	0	0	0	0	0	0	0	50	0	7	0	3	15	1	9	1	531	5	7	23	15	4	29	102	18	50	14	158	5	1	12	2	258	0	4	18	650	86	143	1691	165
X689	Annelida	Annelida_X	Annelida_XX	NA	NA	0	0	0	0	0	0	0	0	0	0	0	0	0	3	2	0	0	49	0	0	0	1	0	21	30	3	2	0	0	0	0	0	0	10	0	0	4	3	1	5	15	34	0	1
X1288	Annelida	Annelida_X	Annelida_XX	Nephtys	NA	0	0	0	0	0	0	2	1	0	0	0	0	0	0	0	0	0	0	0	0	0	0	0	0	0	0	0	0	0	0	0	0	0	0	0	0	0	0	0	0	0	0	0	0
X1346	Annelida	Annelida_X	Annelida_XX	Nephtys	NA	0	0	0	0	0	0	0	18	0	0	0	0	0	1	0	1	0	6	0	0	0	0	0	0	0	0	0	0	2	0	0	0	0	0	0	0	0	0	0	0	0	0	0	0
X1979	Annelida	Annelida_X	Annelida_XX	Nephtys	NA	0	0	0	0	0	1	0	0	0	0	0	0	0	0	0	0	0	0	0	0	0	0	0	0	0	0	0	0	0	0	0	0	0	0	0	0	0	0	0	0	0	0	0	0
X25	Annelida	Annelida_X	Annelida_XX	Nephtys	Nephtys_hombergii	6	1	28	120	188	103	4017	2114	9	56	14	3	104	236	135	1123	125	277	105	17	4	5	1	4	18	0	102	148	205	3	58	0	0	28	4	6	0	0	6	0	0	17	0	401
X2512	Annelida	Annelida_X	Annelida_XX	Nephtys	Nephtys_hombergii	0	0	0	0	0	0	0	0	0	0	0	0	0	0	0	0	0	0	1	0	0	0	0	0	0	0	0	1	0	0	0	0	0	0	0	0	0	0	0	0	0	0	0	0
X2635	Annelida	Annelida_X	Annelida_XX	Nereis	Nereis_limbata	0	0	0	0	0	0	0	0	0	0	0	0	0	0	0	0	0	0	0	0	0	0	0	0	0	0	0	0	0	0	1	0	0	0	0	0	0	0	0	0	0	0	0	0
X2993	Annelida	Annelida_X	Annelida_XX	Nereis	NA	0	0	0	0	0	0	0	0	0	0	0	0	1	0	0	0	0	1	0	0	0	0	0	0	0	0	0	0	0	0	0	0	0	0	0	0	0	0	0	0	0	0	0	0
X3058	Annelida	Annelida_X	Annelida_XX	Nereis	Nereis_limbata	0	0	0	0	0	0	0	0	0	1	0	0	0	0	0	1	1	0	0	0	0	0	0	0	0	0	0	0	0	0	0	0	0	0	0	0	0	0	0	0	0	0	0	0
X456	Annelida	Annelida_X	Annelida_XX	Nereis	Nereis_pelagica	0	0	0	0	3	0	7	3	1	5	1	0	0	4	1	10	5	24	3	6	10	3	1	11	37	2	16	10	4	6	17	3	1	16	14	7	2	0	3	34	4	2	0	0
X89	Annelida	Annelida_X	Annelida_XX	Nereis	Nereis_limbata	32	0	4	4	240	2	74	8	6	175	57	7	8	13	9	94	109	107	45	8	3	4	10	1	0	4	48	1	8	1	4	0	0	4	2	1	0	0	1	0	0	0	0	0
X1347	Annelida	Annelida_X	Annelida_XX	Nicolea	Nicolea_zostericola	0	0	0	0	0	0	0	0	0	0	0	0	0	0	0	0	0	0	0	0	0	0	0	0	0	0	0	0	0	5	2	0	0	2	3	2	0	0	2	86	0	2	0	0
X3629	Annelida	Annelida_X	Annelida_XX	Nicolea	Nicolea_zostericola	0	0	0	0	0	0	0	0	0	0	0	0	0	0	0	0	0	0	0	0	0	0	0	0	0	0	0	0	2	0	0	0	0	0	0	0	0	0	1	1	0	0	0	0
X737	Annelida	Annelida_X	Annelida_XX	Nicolea	Nicolea_zostericola	0	0	0	2	0	0	0	1	0	0	0	0	0	0	0	0	0	0	1	0	0	1	0	0	0	1	6	2	4	9	3	4	1	9	4	2	2	0	11	218	0	2	0	0
X1719	Annelida	Annelida_X	Annelida_XX	Notomastus	Notomastus_latericeus	0	0	0	0	0	0	0	0	0	0	0	0	0	0	0	0	0	0	0	0	0	0	0	0	0	0	0	3	0	0	0	0	0	0	0	0	0	0	0	0	0	10	7	1
X2457	Annelida	Annelida_X	Annelida_XX	Notomastus	Notomastus_latericeus	0	0	0	0	0	0	0	0	0	0	0	0	0	0	0	4	36	5	0	0	0	0	0	0	0	0	0	0	0	0	0	0	0	0	0	0	0	0	0	0	0	0	0	0
X264	Annelida	Annelida_X	Annelida_XX	Owenia	Owenia_fusiformis	0	0	0	0	0	0	0	0	0	0	0	0	0	0	1	9	0	1	0	0	0	0	0	0	0	0	0	5	1	1	0	64	0	0	0	0	0	0	0	1	0	0	4	0
X2999	Annelida	Annelida_X	Annelida_XX	Owenia	Owenia_fusiformis	0	0	0	0	0	0	0	0	0	0	0	0	0	0	0	1	0	0	0	0	0	0	0	0	0	0	0	0	0	0	0	0	0	0	0	0	1	0	0	0	0	0	0	0
X144	Annelida	Annelida_X	Annelida_XX	Pectinaria	Pectinaria_koreni	0	1	17	0	16	2	0	2	3	0	0	0	6	128	0	0	0	0	3	0	0	4	0	1	19	2	2	76	0	0	0	0	537	0	0	0	0	0	1	11	207	15	163	760
X3652	Annelida	Annelida_X	Annelida_XX	Phascolion	Phascolion_strombus	0	0	0	0	0	0	0	0	0	0	0	0	0	0	0	0	0	0	0	0	0	7	0	0	0	0	0	0	0	0	0	0	0	0	0	0	0	0	0	0	0	0	0	0
X3181	Annelida	Annelida_X	Annelida_XX	Phascolopsis	Phascolopsis_gouldii	0	0	2	2	0	0	2	0	0	0	0	0	0	0	0	0	0	0	0	0	0	0	0	0	0	0	0	0	0	0	0	0	0	0	0	0	0	0	0	0	0	0	2	0
X1769	Annelida	Annelida_X	Annelida_XX	Pholoe	Pholoe_baltica	0	0	0	0	0	0	0	0	0	0	0	0	1	0	2	1	2	6	0	0	0	0	0	0	0	0	1	0	0	0	0	0	0	0	1	0	0	0	0	0	0	0	0	0
X2649	Annelida	Annelida_X	Annelida_XX	Pholoe	Pholoe_baltica	0	0	0	0	0	0	0	0	0	0	0	0	2	0	0	11	2	5	0	0	0	0	0	0	0	0	0	1	0	0	0	0	0	0	0	0	0	0	0	0	0	0	0	0
X561	Annelida	Annelida_X	Annelida_XX	Pholoe	Pholoe_baltica	0	0	0	0	0	0	3	4	1	0	0	0	33	6	1	147	13	76	1	0	0	0	1	0	1	0	21	15	5	0	1	0	0	0	1	0	0	0	0	0	0	5	0	0
X1311	Annelida	Annelida_X	Annelida_XX	Pisione	Pisione_remota	0	0	0	0	0	0	0	0	0	0	0	0	0	0	0	0	0	0	0	0	0	0	0	0	0	0	0	0	0	0	0	0	0	1	0	0	0	0	0	0	0	0	0	0
X2938	Annelida	Annelida_X	Annelida_XX	Poecilochaetus	Poecilochaetus_serpens	1	0	0	0	0	0	0	0	0	0	0	0	0	0	0	0	1	2	0	0	0	0	0	0	0	0	0	0	0	0	0	0	0	0	0	0	0	0	0	0	0	2	0	4
X1274	Annelida	Annelida_X	Annelida_XX	Polydora	NA	0	0	0	0	0	0	0	1	0	0	0	0	0	0	0	0	0	0	0	0	0	0	0	0	0	0	0	0	0	0	0	0	0	0	0	0	0	0	0	0	0	0	0	0
X1303	Annelida	Annelida_X	Annelida_XX	Polydora	Polydora_uncinata	0	0	0	1	0	0	0	2	0	0	0	0	0	1	0	26	1	5	1	2	4	0	0	0	1	1	2	0	5	0	2	0	0	2	0	2	0	0	0	1	0	1	0	1
X1554	Annelida	Annelida_X	Annelida_XX	Polydora	Polydora_giardi	0	0	0	0	0	1	0	0	0	0	0	0	0	1	3	40	3	1	0	0	5	2	1	0	0	0	2	0	0	0	0	0	0	1	0	0	0	0	1	3	0	0	0	0
X1731	Annelida	Annelida_X	Annelida_XX	Polydora	Polydora_sp.	0	0	0	0	0	0	0	0	0	0	0	0	0	0	0	0	0	0	0	0	0	0	0	0	0	0	0	0	0	0	0	0	0	0	0	0	0	0	0	1	0	0	0	0
X1777	Annelida	Annelida_X	Annelida_XX	Polydora	Polydora_giardi	0	0	0	0	0	0	0	0	1	0	0	0	0	0	1	11	1	3	0	0	0	1	0	0	0	0	1	0	0	1	0	0	0	3	0	0	0	0	1	1	0	0	0	0
X198	Annelida	Annelida_X	Annelida_XX	Polydora	Polydora_giardi	0	1	2	5	7	5	11	17	13	4	6	1	5	48	18	1053	82	39	34	7	54	49	7	21	50	6	47	0	11	22	18	0	1	30	4	24	0	2	8	82	28	12	9	11
X2112	Annelida	Annelida_X	Annelida_XX	Polydora	Polydora_giardi	0	0	0	0	0	0	0	0	0	0	0	0	0	0	0	1	0	0	0	0	0	0	0	0	0	0	0	0	0	0	0	0	0	0	0	0	0	0	0	0	0	0	0	0
X2252	Annelida	Annelida_X	Annelida_XX	Polydora	NA	0	0	0	0	0	1	0	1	0	0	0	0	0	0	0	0	0	0	0	0	0	0	0	0	0	0	0	0	0	0	0	0	0	0	0	0	0	0	0	0	0	0	0	0
X2357	Annelida	Annelida_X	Annelida_XX	Polydora	NA	0	0	0	0	0	0	0	0	0	0	0	0	0	0	0	0	0	0	0	0	0	0	0	0	0	0	0	0	0	0	0	0	0	0	0	0	0	0	0	0	0	0	0	0
X2383	Annelida	Annelida_X	Annelida_XX	Polydora	Polydora_sp.	0	0	0	0	0	0	0	1	0	0	0	0	0	0	0	0	0	0	0	0	0	0	0	0	0	0	0	0	0	0	0	0	0	0	0	0	0	0	0	0	0	0	0	0
X26	Annelida	Annelida_X	Annelida_XX	Polydora	Polydora_sp.	18	18	4	14	1	85	7	218	2	5	3	0	1	16	2	28	1	7	4	259	10	2	26	9	2	4	3	196	77	17	124	9	1	26	23	4	0	1	11	27	24	3	33	13
X465	Annelida	Annelida_X	Annelida_XX	Polydora	NA	0	0	0	0	0	0	0	0	0	0	0	0	0	0	0	0	0	0	0	0	0	0	0	0	0	0	0	0	0	0	0	0	0	1	0	0	0	0	0	0	0	0	0	0
X471	Annelida	Annelida_X	Annelida_XX	Polydora	Polydora_onagawaensis	0	0	0	0	0	0	0	1	0	1	0	0	0	0	0	0	0	0	0	2	0	0	0	0	0	0	0	0	0	0	0	0	0	0	0	0	0	0	0	0	0	0	0	0
X739	Annelida	Annelida_X	Annelida_XX	Polydora	NA	0	0	0	1	0	0	0	2	0	0	0	0	0	0	0	0	0	0	0	1	0	0	0	0	0	0	0	3	1	0	1	0	0	0	1	0	0	0	0	0	0	0	0	0
X837	Annelida	Annelida_X	Annelida_XX	Polydora	NA	1	0	0	0	0	0	0	0	0	0	0	0	0	0	0	0	0	0	0	0	0	0	0	0	0	0	0	4	0	0	0	0	0	0	0	0	0	0	0	0	0	0	0	0
X855	Annelida	Annelida_X	Annelida_XX	Polydora	NA	0	0	0	0	0	0	0	0	0	0	0	0	0	0	0	0	0	0	0	0	0	0	0	0	0	0	0	0	0	0	0	0	0	0	0	0	0	0	0	0	0	0	0	0
X329	Annelida	Annelida_X	Annelida_XX	Polygordius	NA	0	0	1	0	2	2	0	0	0	0	0	0	0	0	0	1	0	29	3	0	0	0	1	0	0	0	0	0	1	0	3	0	0	0	0	0	0	0	0	0	0	1	0	0
X2497	Annelida	Annelida_X	Annelida_XX	Protodrilus	Protodrilus_ciliatus	0	0	0	0	0	0	0	0	0	0	0	0	0	0	0	0	0	0	0	0	0	0	0	0	0	0	0	0	0	0	0	0	0	0	0	0	0	0	0	0	0	0	0	0
X2785	Annelida	Annelida_X	Annelida_XX	Protodrilus	Protodrilus_purpureus	0	0	0	0	0	0	0	0	0	0	0	0	0	0	0	0	0	0	0	0	0	0	0	0	0	0	0	0	0	0	0	0	0	0	0	0	0	0	0	0	0	0	0	0
X4062	Annelida	Annelida_X	Annelida_XX	Protodrilus	Protodrilus_ciliatus	0	0	0	0	0	0	0	0	0	0	0	0	0	0	0	0	0	0	0	0	0	0	8	0	0	0	0	0	0	0	0	0	0	0	0	0	0	0	0	0	0	0	0	0
X553	Annelida	Annelida_X	Annelida_XX	Protodrilus	Protodrilus_ciliatus	0	0	0	0	0	0	0	0	1	0	0	0	0	0	0	0	7	0	0	0	0	0	0	0	0	0	0	0	0	0	0	0	0	0	0	0	1	0	0	0	0	0	0	0
X523	Annelida	Annelida_X	Annelida_XX	Pygospio	Pygospio_elegans	0	0	0	0	0	0	0	0	0	0	0	0	0	0	0	0	0	0	0	0	0	0	0	0	0	0	0	0	0	0	0	0	0	0	0	0	0	0	0	0	0	0	0	0
X2386	Annelida	Annelida_X	Annelida_XX	Sabella	Sabella_spallanzanii	0	0	0	0	0	0	0	2	0	0	0	0	0	0	0	2	24	18	0	0	0	0	0	0	0	0	0	0	0	0	0	0	0	0	0	0	0	0	0	0	0	0	0	0
X1555	Annelida	Annelida_X	Annelida_XX	Sabellaria	NA	0	0	0	0	0	0	0	0	0	1	0	0	0	0	0	0	0	0	2	0	0	0	0	0	0	0	0	0	0	0	0	0	0	0	0	0	0	0	0	0	0	36	0	0
X2755	Annelida	Annelida_X	Annelida_XX	Salvatoria	Salvatoria_koorineclavata	0	0	0	0	0	0	0	0	0	0	0	0	0	0	0	0	0	0	0	0	0	0	0	0	0	0	0	0	0	0	0	0	0	0	0	0	0	0	0	0	0	0	0	0
X1415	Annelida	Annelida_X	Annelida_XX	Scolelepis	Scolelepis_bonnieri	0	0	0	0	1	0	0	6	0	0	0	0	0	0	0	0	0	0	0	0	0	0	52	0	0	0	0	2	0	0	0	0	0	0	0	0	0	0	0	0	0	1	0	1
X244	Annelida	Annelida_X	Annelida_XX	Scolelepis	Scolelepis_bonnieri	160	19	3	19	5	110	82	595	0	1	0	0	0	7	20	43	7	11	3	0	0	0	0	0	0	0	0	0	1	1	0	0	0	0	0	0	0	0	0	0	0	0	0	0
X379	Annelida	Annelida_X	Annelida_XX	Scolelepis	Scolelepis_bonnieri	2	0	0	0	0	0	0	0	0	1	0	0	0	0	0	0	0	0	0	1	0	0	44	0	0	0	0	21	3	2	0	0	0	3	3	0	0	0	0	0	0	55	6	0
X756	Annelida	Annelida_X	Annelida_XX	Scolelepis	NA	0	0	0	0	0	0	0	0	0	0	0	0	0	0	0	0	0	0	41	0	0	0	0	1	0	0	0	304	5	0	0	0	0	0	0	0	0	0	0	0	0	8	2	0
X940	Annelida	Annelida_X	Annelida_XX	Scolelepis	Scolelepis_squamata	0	0	0	0	0	0	0	0	0	0	0	0	0	0	0	0	0	0	0	0	0	0	6	0	0	0	0	6	0	1	0	0	0	0	0	0	0	0	0	0	0	9	2	0
X944	Annelida	Annelida_X	Annelida_XX	Scolelepis	Scolelepis_squamata	0	0	0	0	0	0	0	0	0	0	0	0	0	0	0	0	0	0	0	0	0	0	3	0	0	0	0	6	0	1	0	0	0	0	0	0	0	0	0	0	0	9	2	0
X2650	Annelida	Annelida_X	Annelida_XX	Scoloplos	Scoloplos_armiger	0	0	0	0	0	0	0	0	0	0	0	0	1	0	0	1	0	0	0	0	0	0	0	0	0	0	0	0	0	0	0	0	0	0	0	0	0	0	0	0	0	0	0	0
X812	Annelida	Annelida_X	Annelida_XX	Scoloplos	Scoloplos_armiger	0	0	0	0	1	0	0	7	1	0	0	0	0	1	1	0	1	2	2	0	0	0	3	0	0	0	0	0	0	0	0	0	0	0	0	0	0	0	0	0	0	0	0	0
X4132	Annelida	Annelida_X	Annelida_XX	Serpula	Serpula_vermicularis	0	0	0	0	0	0	0	0	0	0	0	0	1	2	0	0	0	0	0	0	0	0	0	0	0	0	0	0	0	0	0	0	0	0	0	0	0	0	0	0	0	2	0	0
X861	Annelida	Annelida_X	Annelida_XX	Sphaerosyllis	NA	0	0	0	0	0	0	0	0	0	0	0	0	0	0	0	0	0	0	0	0	0	0	0	0	0	0	0	0	0	1	2	0	0	0	0	0	0	0	0	0	0	2	21	0
X1958	Annelida	Annelida_X	Annelida_XX	Spio	Spio_sp.	0	0	0	0	0	0	0	0	0	0	0	0	0	0	0	0	0	0	0	0	0	0	0	0	0	2	0	0	0	0	0	0	0	0	0	0	0	0	0	0	0	0	0	0
X864	Annelida	Annelida_X	Annelida_XX	Spio	Spio_sp.	0	0	0	0	0	0	1	0	0	0	0	0	0	0	0	0	0	0	0	0	0	0	0	0	0	0	1	0	0	0	0	0	0	0	0	0	0	0	2	0	280	0	0	4
X221	Annelida	Annelida_X	Annelida_XX	Spirobranchus	Spirobranchus_latiscapus	5	7	3	5	4	1	12	5	0	0	4	2	9	7	0	8	2	4	1	0	0	14	12	0	9	15	5	11	17	3	7	3	0	11	14	7	2	4	14	22	26	88	120	74
X276	Annelida	Annelida_X	Annelida_XX	Spirorbis	NA	283	20	3	10	25	3	21	12	18	108	77	6	18	9	3	24	0	0	1	2	1	8	10	1	5	1	15	0	9	8	5	4	0	7	11	4	2	0	5	1	2	10	4	2
X3180	Annelida	Annelida_X	Annelida_XX	Spirorbis	Spirorbis_spirorbis	0	0	0	0	0	0	16	0	0	0	0	0	0	0	0	2	0	0	0	0	0	0	0	0	0	0	0	0	0	0	0	0	0	0	0	0	0	0	0	0	0	0	0	0
X4089	Annelida	Annelida_X	Annelida_XX	Spirorbis	NA	2	0	0	0	0	0	0	0	0	0	0	0	0	0	0	0	0	1	0	0	0	0	0	0	0	0	0	0	0	0	0	0	0	0	0	0	0	0	0	0	0	0	0	0
X1134	Annelida	Annelida_X	Annelida_XX	Sthenelais	Sthenelais_limicola	0	0	0	12	3	2	0	0	0	0	0	0	0	1	6	10	0	0	11	2	0	0	0	0	0	0	57	0	0	0	1	0	0	0	0	1	0	0	1	0	0	11	4	22
X1194	Annelida	Annelida_X	Annelida_XX	Sthenelais	Sthenelais_boa	3	0	1	2	7	3	0	0	0	0	2	1	0	7	6	1	1	1	3	1	0	2	2	0	4	0	1	0	2	1	2	0	0	4	0	1	0	0	1	0	0	1	0	0
X3998	Annelida	Annelida_X	Annelida_XX	Syllides	Syllides_sp.	0	0	0	0	0	0	0	0	0	0	0	0	0	0	0	0	0	0	0	0	0	0	0	0	0	0	0	0	0	0	2	0	0	1	0	0	0	0	0	0	0	0	0	0
X2168	Annelida	Annelida_X	Annelida_XX	Thoracophelia	Thoracophelia_mucronata	0	0	0	0	0	0	0	0	0	2	2	0	0	0	0	0	0	8	0	0	0	0	0	0	0	0	0	0	0	0	0	0	0	0	0	0	0	0	1	0	0	0	0	0
X442	Annelida	Annelida_X	Annelida_XX	Thoracophelia	Thoracophelia_mucronata	0	0	0	0	0	0	4	1	0	27	7	1	7	2	0	12	29	341	0	0	0	1	1	1	0	9	15	0	0	0	6	0	0	0	0	0	0	0	1	2	0	14	1	2
X1105	Annelida	Annelida_X	Annelida_XX	Tomopteris	Tomopteris_sp.	0	0	0	0	0	0	0	0	0	0	0	0	2	0	0	0	0	0	0	0	0	0	0	6	0	3	38	1	0	0	27	0	0	0	0	37	0	0	0	65	0	4	0	0
X3192	Annelida	Annelida_X	Annelida_XX	Typosyllis	Typosyllis_armillaris	0	0	0	0	0	0	3	0	0	0	1	0	1	0	0	0	0	0	0	0	0	0	0	0	0	0	0	0	0	0	0	0	0	0	0	0	0	0	0	0	0	0	0	0
X1439	Apusomonadidae_Group-1	Apusomonadidae_Group-1_X	Apusomonadidae_Group-1_XX	Amastigomonas	Amastigomonas_sp.	0	0	3	3	0	6	0	0	2	1	4	1	2	8	4	3	1	1	0	0	0	4	0	0	0	0	1	2	0	1	0	0	0	0	0	0	0	0	0	0	0	0	0	1
X1909	Apusomonadidae_Group-1	Apusomonadidae_Group-1_X	Apusomonadidae_Group-1_XX	Amastigomonas	NA	9	1	1	7	0	0	0	6	0	1	0	0	0	2	0	0	0	0	0	0	0	1	0	0	0	0	0	0	0	0	0	0	0	4	0	4	0	0	0	0	0	0	0	0
X2711	Apusomonadidae_Group-1	Apusomonadidae_Group-1_X	Apusomonadidae_Group-1_XX	Amastigomonas	Amastigomonas_sp.	0	0	0	0	0	0	2	0	0	0	0	0	0	0	0	0	0	0	0	0	0	0	0	0	0	0	0	0	0	0	0	0	0	0	0	0	0	0	0	0	0	0	1	0
X2797	Apusomonadidae_Group-1	Apusomonadidae_Group-1_X	Apusomonadidae_Group-1_XX	Amastigomonas	Amastigomonas_mutabilis	6	3	0	1	1	2	1	0	0	4	0	0	1	0	0	0	0	0	0	0	0	0	0	0	0	0	0	0	0	0	0	0	0	2	0	0	0	0	0	0	0	0	0	0
X2975	Apusomonadidae_Group-1	Apusomonadidae_Group-1_X	Apusomonadidae_Group-1_XX	Amastigomonas	NA	0	0	0	1	1	1	0	0	0	3	0	0	1	0	0	0	0	1	0	0	0	0	1	0	0	0	0	4	0	0	0	0	0	0	0	0	0	0	0	0	0	0	0	0
X3611	Apusomonadidae_Group-1	Apusomonadidae_Group-1_X	Apusomonadidae_Group-1_XX	Amastigomonas	Amastigomonas_sp.	0	0	0	0	0	0	0	1	0	0	0	0	0	1	3	0	0	0	0	0	0	1	2	0	0	0	0	0	0	0	0	0	0	0	0	0	0	0	0	0	0	0	0	0
X3754	Apusomonadidae_Group-1	Apusomonadidae_Group-1_X	Apusomonadidae_Group-1_XX	Amastigomonas	Amastigomonas_sp.	0	0	0	0	0	0	0	0	0	0	0	0	0	0	0	0	0	0	0	0	0	0	0	0	0	0	0	0	0	0	0	0	0	0	0	0	0	0	0	0	0	0	0	0
X3229	Apusomonadidae_Group-1	Apusomonadidae_Group-1_X	Apusomonadidae_Group-1_XX	Apusomonadidae_Group-1_XXX	Apusomonadidae_Group-1_XXX_sp.	0	3	3	1	0	1	4	0	0	0	0	0	0	0	0	0	0	0	0	0	0	0	0	0	1	0	0	0	2	0	0	0	0	0	2	0	0	0	0	0	0	0	0	0
X1397	Apusomonadidae_Group-1	Apusomonadidae_Group-1_X	Apusomonadidae_Group-1_XX	Apusomonas	Apusomonas_proboscidea	0	1	2	5	0	6	0	0	0	0	2	0	0	14	1	3	0	0	2	0	0	3	0	0	0	1	0	6	0	2	0	0	0	0	0	0	0	0	0	0	0	0	0	0
X2991	Apusomonadidae_Group-1	Apusomonadidae_Group-1_X	Apusomonadidae_Group-1_XX	Apusomonas	Apusomonas_proboscidea	0	0	0	0	0	0	0	4	0	0	0	0	0	0	1	0	0	0	0	0	0	0	0	0	0	0	0	0	0	0	0	2	0	0	0	0	0	0	0	0	0	0	0	0
X3083	Apusomonadidae_Group-1	Apusomonadidae_Group-1_X	Apusomonadidae_Group-1_XX	Apusomonas	Apusomonas_proboscidea	1	1	0	0	0	0	0	0	0	0	0	0	0	0	0	0	0	0	1	0	0	0	0	0	0	0	0	0	0	0	0	0	0	0	0	0	0	0	0	0	0	0	0	0
X710	Apusomonadidae_Group-1	Apusomonadidae_Group-1_X	Apusomonadidae_Group-1_XX	Apusomonas	Apusomonas_proboscidea	2	4	1	8	2	1	1	8	0	4	4	0	1	2	0	0	0	0	0	0	0	5	1	0	0	1	0	6	2	3	0	0	0	0	0	0	0	0	3	0	2	3	0	0
X986	Apusomonadidae_Group-1	Apusomonadidae_Group-1_X	Apusomonadidae_Group-1_XX	Apusomonas	Apusomonas_proboscidea	5	4	4	6	3	1	1	3	0	10	1	0	0	3	6	0	4	0	4	0	0	9	1	0	1	3	4	10	1	1	0	0	0	3	0	0	1	0	0	0	0	9	0	0
X1582	Apusomonadidae_Group-1	Apusomonadidae_Group-1_X	Apusomonadidae_Group-1_XX	NA	NA	0	1	0	5	0	3	0	1	0	4	0	0	2	3	2	1	1	0	0	2	0	0	0	0	0	5	2	2	0	5	0	4	0	1	0	0	0	0	0	0	0	0	0	0
X1950	Apusomonadidae_Group-1	Apusomonadidae_Group-1_X	Apusomonadidae_Group-1_XX	NA	NA	1	4	1	0	1	0	1	1	0	0	0	0	0	0	0	1	0	0	0	0	1	2	1	0	0	0	0	0	0	0	0	0	0	0	0	0	0	0	0	0	0	1	0	1
X2053	Apusomonadidae_Group-1	Apusomonadidae_Group-1_X	Apusomonadidae_Group-1_XX	NA	NA	1	3	3	2	3	1	1	1	1	0	0	0	0	0	0	0	0	0	0	0	2	2	0	0	0	0	0	0	0	0	0	0	0	0	1	0	0	0	0	0	0	0	0	0
X2237	Apusomonadidae_Group-1	Apusomonadidae_Group-1_X	Apusomonadidae_Group-1_XX	NA	NA	5	4	6	2	0	0	0	4	0	2	2	0	1	5	0	0	0	0	1	0	0	1	0	0	0	0	1	0	1	0	0	0	0	0	0	0	0	0	0	0	0	0	0	0
X2341	Apusomonadidae_Group-1	Apusomonadidae_Group-1_X	Apusomonadidae_Group-1_XX	NA	NA	2	1	1	4	1	1	2	0	2	2	2	0	0	2	1	1	0	0	1	0	0	0	3	0	0	0	0	0	0	1	0	0	0	0	0	0	0	0	0	0	0	0	0	0
X2701	Apusomonadidae_Group-1	Apusomonadidae_Group-1_X	Apusomonadidae_Group-1_XX	NA	NA	0	0	0	1	0	1	1	1	1	2	0	0	1	0	1	0	0	0	1	0	0	1	0	0	0	0	1	0	0	0	0	0	0	0	0	0	0	0	0	0	0	1	0	0
X3743	Apusomonadidae_Group-1	Apusomonadidae_Group-1_X	Apusomonadidae_Group-1_XX	NA	NA	0	0	0	0	0	0	0	0	0	0	0	0	0	0	0	3	0	0	0	0	0	0	0	0	0	0	0	0	0	0	0	0	0	0	0	0	0	0	0	0	0	0	0	0
X517	Apusomonadidae_Group-1	Apusomonadidae_Group-1_X	Apusomonadidae_Group-1_XX	NA	NA	39	77	85	96	57	40	35	39	17	88	14	3	15	3	19	12	4	5	4	2	1	3	0	1	1	5	1	8	6	8	3	0	0	10	2	5	3	0	1	4	3	3	0	1
X1590	Apusomonadidae_Group-2	Apusomonadidae_Group-2_X	Apusomonadidae_Group-2_XX	Thecamonas	Thecamonas_trahens	0	0	0	0	4	1	2	2	0	2	0	0	0	0	0	2	0	1	2	0	3	0	2	0	2	0	2	0	0	0	0	0	0	3	1	0	0	0	0	0	0	2	1	0
X2776	Apusomonadidae_Group-2	Apusomonadidae_Group-2_X	Apusomonadidae_Group-2_XX	Thecamonas	Thecamonas_trahens	0	0	0	0	0	0	3	0	0	0	0	0	0	0	0	2	0	0	0	0	0	0	0	0	0	0	0	0	0	0	0	0	0	0	0	0	0	0	0	0	0	0	0	0
X2988	Apusomonadidae_Group-2	Apusomonadidae_Group-2_X	Apusomonadidae_Group-2_XX	Thecamonas	Thecamonas_trahens	0	0	0	0	0	0	0	0	0	0	1	0	0	1	2	0	0	1	1	0	0	0	0	0	0	0	0	1	0	0	0	0	0	0	0	0	0	0	0	0	0	0	0	0
X4325	Apusomonadidae_Group-3	Apusomonadidae_Group-3_X	Apusomonadidae_Group-3_XX	Apusomonadidae_Group-3_XXX	Apusomonadidae_Group-3_XXX_sp.	0	0	0	0	0	0	0	1	0	0	0	0	0	0	0	0	0	0	0	0	0	0	0	0	0	0	0	0	0	0	0	0	0	0	0	0	0	0	0	0	0	0	0	0
X1036	Arthropoda	Crustacea	Maxillopoda	Acartia	Acartia_clausii	0	0	1	0	0	0	0	4	1	0	0	0	0	0	0	0	0	0	0	0	0	0	0	0	0	0	0	0	0	0	0	0	0	0	0	0	0	0	2	0	0	0	0	1
X1215	Arthropoda	Crustacea	Maxillopoda	Acartia	Acartia_clausii	0	0	0	0	0	0	0	1	0	0	0	0	0	0	0	0	0	0	0	0	0	0	0	0	0	0	0	0	0	0	0	0	1	0	0	0	0	0	0	0	0	0	0	0
X1277	Arthropoda	Crustacea	Maxillopoda	Acartia	Acartia_clausii	1	0	0	0	1	0	0	3	0	0	0	0	0	0	0	0	0	1	0	0	0	0	0	0	0	0	0	0	0	0	2	0	0	0	0	0	0	0	1	0	0	1	0	0
X1315	Arthropoda	Crustacea	Maxillopoda	Acartia	Acartia_tonsa	0	0	0	0	0	0	0	0	0	0	0	0	0	0	0	0	0	0	0	0	0	0	0	0	0	0	0	0	0	0	0	0	0	0	0	0	0	0	0	0	0	0	0	0
X1364	Arthropoda	Crustacea	Maxillopoda	Acartia	Acartia_clausii	0	0	0	0	0	0	0	0	0	0	0	0	0	0	0	0	0	0	0	0	0	0	0	0	0	0	0	0	0	0	0	0	0	0	0	0	0	0	0	0	0	0	0	0
X1451	Arthropoda	Crustacea	Maxillopoda	Acartia	Acartia_clausii	0	0	0	0	0	0	0	0	0	0	0	0	0	0	1	0	0	0	0	0	0	0	1	0	0	0	0	0	0	0	0	0	0	0	0	0	0	0	0	1	0	0	0	0
X1503	Arthropoda	Crustacea	Maxillopoda	Acartia	Acartia_bifilosa	0	0	0	0	0	0	0	0	0	0	0	0	0	0	0	0	0	0	0	0	0	0	0	0	0	0	0	0	0	0	0	0	0	0	0	0	0	0	0	0	0	0	0	0
X1512	Arthropoda	Crustacea	Maxillopoda	Acartia	Acartia_clausii	0	0	0	0	0	0	0	1	0	0	0	0	0	0	0	0	0	0	0	0	0	0	0	0	0	0	0	0	0	0	0	0	0	0	0	0	0	0	0	0	0	0	0	0
X1553	Arthropoda	Crustacea	Maxillopoda	Acartia	Acartia_clausii	0	0	0	0	0	3	0	9	0	1	0	1	0	0	1	0	0	0	0	0	1	0	0	0	0	0	0	0	1	0	0	0	2	1	0	0	0	0	2	0	0	1	1	0
X162	Arthropoda	Crustacea	Maxillopoda	Acartia	Acartia_clausii	0	0	1	0	0	1	1	28	0	2	0	0	0	2	1	1	0	0	0	4	1	1	0	0	0	1	0	0	1	0	1	0	21	1	0	0	0	0	1	1	3	0	0	0
X1651	Arthropoda	Crustacea	Maxillopoda	Acartia	Acartia_clausii	0	0	0	0	0	0	0	1	0	0	0	0	0	0	0	0	0	0	0	0	0	0	0	0	0	0	0	0	0	0	0	0	0	0	0	0	0	0	0	0	0	0	0	0
X1667	Arthropoda	Crustacea	Maxillopoda	Acartia	Acartia_clausii	0	0	0	0	0	0	0	0	0	0	0	0	0	0	0	0	0	0	0	0	0	0	0	0	0	0	0	0	0	0	0	0	0	0	0	0	0	0	0	0	0	0	0	0
X1823	Arthropoda	Crustacea	Maxillopoda	Acartia	Acartia_bifilosa	0	0	0	0	0	0	0	0	0	0	0	0	0	0	0	0	0	0	0	0	0	0	0	0	0	0	0	0	0	0	0	0	0	0	0	0	0	0	0	0	0	0	0	0
X1830	Arthropoda	Crustacea	Maxillopoda	Acartia	Acartia_clausii	0	0	0	0	0	0	0	0	0	0	0	0	0	0	0	0	0	0	0	0	0	0	0	0	0	0	0	0	0	0	0	0	0	0	0	0	0	0	0	0	0	0	0	0
X1854	Arthropoda	Crustacea	Maxillopoda	Acartia	Acartia_clausii	0	0	0	0	0	0	0	0	0	0	0	0	0	0	0	0	0	0	0	0	0	0	0	0	0	0	0	0	0	0	0	0	0	0	0	0	0	0	0	0	0	0	0	0
X1907	Arthropoda	Crustacea	Maxillopoda	Acartia	Acartia_bifilosa	0	0	0	0	0	0	0	0	0	0	0	0	0	0	0	0	0	0	0	0	0	0	0	0	0	0	0	0	0	0	0	0	0	0	0	0	0	0	0	0	0	0	0	0
X1978	Arthropoda	Crustacea	Maxillopoda	Acartia	Acartia_clausii	0	0	0	0	0	3	0	20	0	0	0	0	0	0	0	0	0	0	0	0	0	0	0	0	0	0	0	0	0	0	0	0	0	0	0	0	0	0	0	0	0	0	0	0
X2	Arthropoda	Crustacea	Maxillopoda	Acartia	Acartia_clausii	90	5	107	15	57	308	215	8653	42	150	32	3	55	313	37	23	8	104	14	1020	29	43	84	59	7	124	5	53	165	19	201	41	5508	289	10	5	17	14	231	92	262	43	7	174
X2038	Arthropoda	Crustacea	Maxillopoda	Acartia	Acartia_clausii	0	0	0	0	0	0	0	0	0	0	0	0	0	0	0	0	0	0	0	0	0	0	0	0	0	0	0	0	0	0	0	0	0	0	0	0	0	0	0	0	0	0	0	0
X2062	Arthropoda	Crustacea	Maxillopoda	Acartia	Acartia_clausii	0	0	0	0	0	0	0	0	0	0	0	0	0	0	0	0	0	0	0	0	0	0	0	0	0	0	0	0	0	0	0	0	0	0	0	0	0	0	0	0	0	0	0	0
X2095	Arthropoda	Crustacea	Maxillopoda	Acartia	Acartia_clausii	0	0	0	0	0	0	0	0	0	0	0	0	0	0	0	0	0	0	0	0	0	0	0	0	0	0	0	0	0	0	0	0	0	0	0	0	0	0	0	0	0	0	0	0
X2197	Arthropoda	Crustacea	Maxillopoda	Acartia	Acartia_clausii	0	0	0	0	0	0	0	0	0	0	0	0	0	0	0	0	0	0	0	0	0	0	0	0	0	0	0	0	0	0	0	0	0	0	0	0	0	0	0	0	0	0	0	0
X2213	Arthropoda	Crustacea	Maxillopoda	Acartia	Acartia_clausii	0	0	0	0	0	0	0	0	0	0	0	0	0	0	0	0	0	0	0	0	0	0	0	0	0	0	0	0	0	0	0	0	0	0	0	0	0	0	0	0	0	0	0	0
X2274	Arthropoda	Crustacea	Maxillopoda	Acartia	Acartia_clausii	0	0	0	0	0	0	0	0	0	0	0	0	0	0	0	0	0	0	0	0	0	0	0	0	0	0	0	0	0	0	0	0	0	0	0	0	0	0	0	0	0	0	0	0
X2301	Arthropoda	Crustacea	Maxillopoda	Acartia	Acartia_clausii	0	0	0	0	0	0	0	0	0	0	0	0	0	0	0	0	0	0	0	0	0	0	0	0	0	0	0	0	0	0	0	0	0	0	0	0	0	0	0	0	0	0	0	0
X2409	Arthropoda	Crustacea	Maxillopoda	Acartia	Acartia_clausii	0	0	0	0	0	0	0	0	0	0	0	0	0	0	0	0	0	0	0	0	0	0	0	0	0	0	0	0	0	0	0	0	0	0	0	0	0	0	0	0	0	0	0	0
X2454	Arthropoda	Crustacea	Maxillopoda	Acartia	Acartia_clausii	0	0	0	0	0	0	0	2	0	0	0	0	0	0	0	0	0	0	0	0	0	0	0	0	0	0	0	0	0	0	1	0	1	0	0	0	0	0	0	0	0	1	0	0
X2577	Arthropoda	Crustacea	Maxillopoda	Acartia	Acartia_clausii	0	0	0	0	0	0	0	0	0	0	0	0	0	0	0	0	0	0	0	0	0	0	0	0	0	0	0	0	0	0	0	0	0	0	0	0	0	0	0	0	0	0	0	0
X2578	Arthropoda	Crustacea	Maxillopoda	Acartia	Acartia_clausii	0	0	0	0	0	0	0	0	0	0	0	0	0	0	0	0	0	0	0	0	0	0	0	0	0	0	0	0	0	0	0	0	0	0	0	0	0	0	0	0	0	0	0	0
X2653	Arthropoda	Crustacea	Maxillopoda	Acartia	Acartia_clausii	0	0	0	0	0	0	0	0	0	0	0	0	0	0	0	0	0	0	0	0	0	0	0	0	0	0	0	0	0	0	0	0	0	0	0	0	0	0	0	0	0	0	0	0
X2749	Arthropoda	Crustacea	Maxillopoda	Acartia	Acartia_clausii	0	0	0	0	0	0	0	0	0	0	0	0	0	0	0	0	0	0	0	0	0	0	0	0	0	0	0	0	0	0	0	0	0	0	0	0	0	0	0	0	0	0	0	0
X2843	Arthropoda	Crustacea	Maxillopoda	Acartia	Acartia_bifilosa	0	0	0	0	0	0	0	0	0	0	0	0	0	0	0	0	0	0	0	0	0	0	0	0	0	0	0	0	0	0	0	0	0	0	0	0	0	0	0	0	0	0	0	0
X2865	Arthropoda	Crustacea	Maxillopoda	Acartia	Acartia_clausii	0	0	0	0	0	0	1	4	2	1	0	0	0	0	0	0	1	0	0	0	0	0	0	0	0	0	0	0	0	0	0	0	0	0	0	0	0	0	0	0	0	0	0	0
X2892	Arthropoda	Crustacea	Maxillopoda	Acartia	Acartia_clausii	0	0	0	0	0	0	0	0	0	0	0	0	0	0	0	0	0	0	0	0	0	0	0	0	0	0	0	0	0	0	0	0	0	0	0	0	0	0	0	0	0	0	0	0
X2904	Arthropoda	Crustacea	Maxillopoda	Acartia	Acartia_clausii	0	0	0	0	0	0	0	0	1	0	0	0	0	0	0	0	0	0	0	0	0	0	0	0	0	0	0	0	0	0	0	0	1	0	0	0	0	0	0	0	0	0	0	0
X2956	Arthropoda	Crustacea	Maxillopoda	Acartia	Acartia_clausii	0	0	0	0	0	0	0	2	0	0	0	0	0	0	0	0	0	0	0	0	0	0	0	0	0	0	0	0	0	0	0	0	1	0	0	0	0	0	0	0	0	0	0	0
X3023	Arthropoda	Crustacea	Maxillopoda	Acartia	Acartia_clausii	0	0	0	0	0	1	0	0	0	1	0	0	0	0	0	0	0	0	0	0	0	0	0	0	0	0	0	1	0	0	0	0	0	0	0	0	0	0	0	0	0	0	0	0
X3025	Arthropoda	Crustacea	Maxillopoda	Acartia	Acartia_clausii	0	0	1	1	0	0	0	4	0	0	0	0	0	1	0	0	0	0	0	0	0	0	0	0	0	0	0	0	0	0	0	0	0	0	0	0	0	0	0	0	0	0	0	0
X3070	Arthropoda	Crustacea	Maxillopoda	Acartia	Acartia_clausii	0	0	0	0	0	0	0	0	0	0	0	0	0	0	0	0	0	0	0	0	0	0	0	0	0	0	0	0	0	0	0	0	0	0	0	0	0	0	0	0	0	0	0	0
X3102	Arthropoda	Crustacea	Maxillopoda	Acartia	Acartia_clausii	0	0	0	0	0	0	1	1	0	0	0	0	0	0	0	0	0	0	0	0	0	0	0	0	0	0	0	0	0	0	0	0	0	0	0	0	0	0	1	0	0	0	0	0
X3103	Arthropoda	Crustacea	Maxillopoda	Acartia	Acartia_bifilosa	0	0	0	0	0	0	0	0	0	0	0	0	0	0	0	0	0	0	0	0	0	0	0	0	0	0	0	0	0	0	0	3	0	0	0	0	0	0	0	0	0	0	0	0
X3112	Arthropoda	Crustacea	Maxillopoda	Acartia	Acartia_clausii	0	0	0	0	0	0	0	0	0	0	0	0	0	0	0	0	0	0	0	0	0	0	0	0	0	0	0	0	0	0	0	0	0	0	0	0	0	0	0	0	0	0	0	0
X3150	Arthropoda	Crustacea	Maxillopoda	Acartia	Acartia_bifilosa	0	0	0	0	0	0	0	0	0	0	0	0	0	0	0	0	0	0	0	0	0	0	0	0	0	0	0	0	0	0	0	0	0	0	0	0	0	0	0	0	0	0	0	0
X319	Arthropoda	Crustacea	Maxillopoda	Acartia	Acartia_clausii	0	0	0	0	0	2	0	20	0	0	1	0	0	0	0	0	0	1	0	2	0	0	0	1	0	1	0	0	0	0	1	0	7	0	0	0	0	0	1	0	0	0	0	1
X3202	Arthropoda	Crustacea	Maxillopoda	Acartia	Acartia_clausii	0	0	0	0	0	0	0	0	0	0	0	0	0	0	0	0	0	0	0	0	0	0	0	0	0	0	0	0	0	0	0	0	0	0	0	0	0	0	0	0	0	1	0	0
X3238	Arthropoda	Crustacea	Maxillopoda	Acartia	Acartia_clausii	0	0	0	0	0	0	0	0	0	0	0	0	0	0	0	1	0	0	0	0	0	0	0	1	0	0	0	0	0	0	0	0	0	0	0	0	0	0	0	0	0	0	0	0
X3239	Arthropoda	Crustacea	Maxillopoda	Acartia	Acartia_clausii	0	0	0	0	0	0	0	0	0	0	0	0	0	0	0	0	0	0	0	0	0	0	0	0	0	0	0	0	0	0	0	0	0	0	0	0	0	0	0	0	0	0	0	0
X3299	Arthropoda	Crustacea	Maxillopoda	Acartia	Acartia_clausii	0	0	0	0	0	0	0	0	0	0	0	0	0	0	0	0	0	0	0	0	0	0	0	0	0	0	0	0	0	0	0	0	0	0	0	0	0	0	0	0	0	0	0	0
X3350	Arthropoda	Crustacea	Maxillopoda	Acartia	Acartia_clausii	0	0	0	0	0	0	0	0	0	0	0	0	0	0	0	0	0	0	0	0	0	0	0	0	0	0	0	0	0	0	0	0	0	0	0	0	0	0	0	0	0	0	0	0
X338	Arthropoda	Crustacea	Maxillopoda	Acartia	Acartia_clausii	0	0	0	0	0	0	1	16	0	1	0	0	0	0	0	0	0	0	0	1	0	0	2	0	0	1	0	0	2	0	0	0	9	0	0	0	0	0	0	0	1	1	0	0
X3386	Arthropoda	Crustacea	Maxillopoda	Acartia	Acartia_clausii	0	0	0	0	0	2	0	3	0	0	0	0	0	0	0	0	0	0	0	0	0	0	0	0	0	0	0	0	0	0	0	0	0	0	0	0	0	0	0	0	0	0	0	0
X3401	Arthropoda	Crustacea	Maxillopoda	Acartia	Acartia_clausii	0	0	0	0	0	0	0	0	0	0	0	0	0	0	0	0	0	0	0	0	0	0	0	0	0	0	0	0	0	0	0	0	0	0	0	0	0	0	0	0	0	0	0	0
X3557	Arthropoda	Crustacea	Maxillopoda	Acartia	Acartia_clausii	0	0	0	0	0	1	0	3	0	0	0	0	0	0	0	0	0	0	0	0	0	0	0	0	0	0	0	0	0	0	0	0	0	1	0	0	0	0	0	0	0	0	0	0
X356	Arthropoda	Crustacea	Maxillopoda	Acartia	Acartia_clausii	0	0	0	0	0	0	0	10	0	0	0	0	0	1	0	0	0	0	0	1	0	0	0	0	0	0	0	0	0	0	0	0	11	0	0	0	0	0	0	0	0	0	0	0
X368	Arthropoda	Crustacea	Maxillopoda	Acartia	Acartia_bifilosa	1	0	0	0	0	0	0	0	0	0	0	0	0	0	0	0	0	0	0	0	0	0	0	0	0	0	0	0	0	0	0	8	0	0	0	0	0	0	0	0	0	0	0	0
X3868	Arthropoda	Crustacea	Maxillopoda	Acartia	Acartia_clausii	0	0	0	0	0	0	0	0	0	0	0	0	0	0	0	0	0	0	0	0	0	0	0	0	0	0	0	0	0	0	0	0	0	0	0	0	0	0	0	0	0	0	0	0
X393	Arthropoda	Crustacea	Maxillopoda	Acartia	Acartia_clausii	0	0	0	0	0	1	0	8	0	0	0	0	0	0	0	0	0	1	0	0	0	0	0	0	0	0	0	0	0	0	0	0	5	0	0	0	0	0	0	0	0	0	0	0
X431	Arthropoda	Crustacea	Maxillopoda	Acartia	Acartia_clausii	0	0	0	0	0	4	0	3	0	0	0	0	0	1	0	0	0	1	0	0	0	0	0	0	0	0	0	0	0	0	0	0	0	0	0	0	0	0	2	0	0	0	0	0
X4382	Arthropoda	Crustacea	Maxillopoda	Acartia	Acartia_clausii	0	0	0	0	0	0	0	0	0	0	0	0	0	0	0	0	0	0	0	0	0	0	0	0	0	0	0	0	0	0	0	0	0	1	0	0	0	0	0	0	0	0	0	0
X548	Arthropoda	Crustacea	Maxillopoda	Acartia	Acartia_clausii	0	0	0	0	0	0	0	8	0	0	0	0	0	0	0	0	0	0	0	0	0	0	0	0	0	0	0	0	0	0	0	0	0	0	0	0	0	0	0	0	0	0	0	0
X637	Arthropoda	Crustacea	Maxillopoda	Acartia	Acartia_clausii	1	0	0	0	0	0	0	10	0	0	0	0	0	0	0	0	0	0	0	0	0	0	0	0	0	0	0	0	0	0	0	0	0	0	0	0	0	0	0	0	0	0	0	0
X671	Arthropoda	Crustacea	Maxillopoda	Acartia	Acartia_bifilosa	0	0	0	0	0	0	0	0	0	0	0	0	0	0	0	0	0	0	0	0	0	0	0	0	0	0	0	0	0	0	0	0	0	0	0	0	0	0	0	0	0	0	0	0
X788	Arthropoda	Crustacea	Maxillopoda	Acartia	Acartia_clausii	0	0	0	0	0	0	0	2	0	0	0	0	0	1	0	0	0	0	0	1	0	0	0	0	0	0	0	0	0	1	0	0	0	0	0	0	0	0	0	0	0	0	0	0
X903	Arthropoda	Crustacea	Maxillopoda	Acartia	Acartia_bifilosa	0	0	0	0	0	0	0	0	0	0	0	0	0	0	0	0	0	0	0	0	0	0	0	0	0	0	0	0	0	0	0	0	0	0	0	0	0	0	0	0	0	0	0	0
X937	Arthropoda	Crustacea	Maxillopoda	Acartia	Acartia_clausii	0	0	0	0	0	0	0	0	0	0	0	0	0	0	0	0	0	0	0	0	0	0	0	0	0	0	0	0	0	0	0	0	0	0	0	0	0	0	1	0	0	0	0	0
X4111	Arthropoda	Chelicerata	Pycnogonida	Achelia	NA	0	0	0	0	0	0	0	0	0	0	0	0	0	0	0	0	0	0	0	0	0	0	0	0	0	0	0	0	0	0	0	0	0	0	0	0	0	0	0	0	0	0	0	0
X1616	Arthropoda	Crustacea	Maxillopoda	Anomalocera	Anomalocera_patersoni	0	2	0	0	0	0	1	0	0	0	0	0	0	0	0	0	0	0	0	0	0	0	0	0	0	0	0	0	0	0	0	0	0	0	0	0	0	0	0	0	0	0	0	0
X3934	Arthropoda	Crustacea	Maxillopoda	Attheyella	Attheyella_crassa	0	0	0	0	0	0	0	0	0	0	0	0	0	0	0	0	0	0	1	0	0	0	0	0	0	0	0	0	0	0	0	0	0	0	0	0	0	0	0	0	0	0	0	0
X1093	Arthropoda	Crustacea	Maxillopoda	Calanus	Calanus_helgolandicus	0	0	0	0	0	0	0	0	1	2	0	0	0	0	0	0	0	0	0	0	1	0	0	0	0	0	0	0	0	4	1	1	0	0	1	3	0	1	0	0	0	0	1	0
X1275	Arthropoda	Crustacea	Maxillopoda	Calanus	Calanus_helgolandicus	0	0	0	0	0	0	0	0	0	0	0	0	0	0	0	0	0	0	0	0	0	0	0	0	0	0	0	0	0	0	0	0	0	0	0	0	0	0	0	0	0	0	0	0
X1843	Arthropoda	Crustacea	Maxillopoda	Calanus	NA	0	0	0	0	0	0	0	0	0	0	0	0	0	0	0	0	0	0	0	0	0	0	0	0	0	0	0	0	0	0	0	0	0	0	0	0	0	0	0	0	0	0	0	0
X2153	Arthropoda	Crustacea	Maxillopoda	Calanus	NA	0	0	0	0	0	0	0	1	1	2	0	1	0	0	0	1	0	0	0	0	1	0	0	0	2	1	0	0	0	0	0	2	0	0	0	0	0	0	0	0	0	0	0	0
X2303	Arthropoda	Crustacea	Maxillopoda	Calanus	NA	0	0	0	0	0	0	0	0	0	0	0	0	0	0	0	0	0	0	0	0	0	0	0	0	0	0	0	0	0	0	0	0	0	0	0	0	0	0	0	0	0	0	0	0
X2375	Arthropoda	Crustacea	Maxillopoda	Calanus	Calanus_helgolandicus	0	0	0	0	0	0	0	0	0	0	0	0	0	0	0	0	0	0	0	0	0	0	0	0	0	0	0	0	0	0	0	0	0	0	0	0	0	0	0	0	0	0	0	0
X2376	Arthropoda	Crustacea	Maxillopoda	Calanus	Calanus_helgolandicus	0	0	0	0	0	0	0	0	0	0	0	0	0	0	0	0	0	0	0	0	0	0	0	0	0	0	0	0	0	0	0	0	0	0	0	0	0	0	0	0	0	0	0	0
X2493	Arthropoda	Crustacea	Maxillopoda	Calanus	NA	0	0	0	0	0	0	0	1	0	0	0	1	0	0	0	0	0	0	0	0	0	0	0	0	0	0	0	0	1	0	1	0	0	0	0	3	0	0	0	0	0	0	1	0
X2679	Arthropoda	Crustacea	Maxillopoda	Calanus	NA	0	0	0	0	0	0	0	0	0	1	0	0	0	0	0	0	0	0	0	0	0	0	0	0	0	0	0	0	1	0	0	0	0	0	1	0	0	1	0	0	0	0	0	0
X3173	Arthropoda	Crustacea	Maxillopoda	Calanus	NA	0	0	0	0	1	0	1	0	0	0	0	0	0	0	0	0	0	0	0	0	0	0	0	0	0	2	0	0	0	0	0	0	0	0	0	1	0	0	0	0	0	0	0	0
X324	Arthropoda	Crustacea	Maxillopoda	Calanus	Calanus_helgolandicus	0	0	0	0	0	0	0	0	0	3	0	0	0	0	0	0	0	0	0	0	0	0	0	0	1	0	0	0	0	2	1	3	0	0	0	2	0	0	1	0	0	0	0	1
X3351	Arthropoda	Crustacea	Maxillopoda	Calanus	NA	0	0	0	0	0	0	0	0	0	0	0	0	0	0	0	0	0	0	0	0	0	0	0	0	0	0	0	0	0	1	0	0	0	0	0	0	0	0	0	0	0	0	0	0
X4	Arthropoda	Crustacea	Maxillopoda	Calanus	Calanus_helgolandicus	43	5	7	5	16	10	118	215	79	1939	10	234	31	15	2	53	9	23	18	68	305	43	46	255	258	770	235	18	281	514	235	1524	29	16	119	2252	9	87	18	29	4	95	227	220
X519	Arthropoda	Crustacea	Maxillopoda	Calanus	Calanus_helgolandicus	0	0	0	0	0	0	0	0	0	0	0	0	0	0	0	0	0	0	0	0	0	0	0	0	0	0	0	0	0	0	0	0	0	0	0	0	0	0	0	0	0	0	0	0
X538	Arthropoda	Crustacea	Maxillopoda	Calanus	Calanus_helgolandicus	0	0	0	0	0	0	0	0	0	1	0	0	0	0	0	0	0	0	0	0	0	0	0	0	0	0	2	0	0	0	0	2	0	0	0	0	0	0	0	0	0	0	0	0
X663	Arthropoda	Crustacea	Maxillopoda	Calanus	Calanus_helgolandicus	0	0	0	0	0	0	0	0	0	0	0	0	0	0	0	0	0	0	0	0	0	0	0	1	0	0	0	0	0	0	0	1	0	0	0	0	0	0	0	0	0	0	0	0
X934	Arthropoda	Crustacea	Maxillopoda	Canuella	Canuella_perplexa	0	0	0	0	0	0	0	0	0	0	0	0	0	0	0	0	0	0	0	0	0	0	0	0	0	0	0	0	0	0	0	0	0	0	0	0	0	0	0	0	0	0	0	0
X1103	Arthropoda	Crustacea	Malacostraca	Carcinus	Carcinus_maenas	0	0	0	0	0	0	0	0	0	0	0	0	1	0	0	0	0	0	0	0	0	0	0	0	0	0	0	0	0	0	0	0	0	0	0	2	0	0	0	0	0	11	0	0
X1228	Arthropoda	Crustacea	Malacostraca	Carcinus	Carcinus_maenas	65	1	0	0	0	0	0	0	0	0	0	0	1	0	0	0	0	0	0	0	0	0	0	1	0	0	1	0	0	0	0	0	0	0	0	0	0	5	1	0	0	0	0	0
X1113	Arthropoda	Crustacea	Maxillopoda	Centropages	Centropages_hamatus	0	0	0	0	0	0	0	0	0	0	0	0	0	0	0	0	0	0	0	0	0	0	0	0	0	0	0	0	0	0	0	0	0	0	0	0	0	0	0	0	0	0	0	0
X1343	Arthropoda	Crustacea	Maxillopoda	Centropages	Centropages_hamatus	0	0	0	0	0	4	0	0	0	0	1	0	0	0	0	0	0	0	0	0	0	0	0	0	0	0	0	0	0	0	0	0	0	0	0	0	0	0	0	0	0	0	0	0
X14	Arthropoda	Crustacea	Maxillopoda	Centropages	Centropages_hamatus	15	3	11	3	3	586	5	40	19	7	275	0	17	49	2	4	1	27	3	2	31	2	16	21	0	7	1	1	60	24	30	21	3	0	1	2	1	1	11	18	89	19	6	37
X1565	Arthropoda	Crustacea	Maxillopoda	Centropages	Centropages_hamatus	0	0	0	0	0	1	0	0	0	0	0	0	0	0	0	0	0	1	0	0	0	0	0	0	0	0	0	0	0	0	0	0	0	0	0	0	0	0	0	0	0	0	0	0
X1874	Arthropoda	Crustacea	Maxillopoda	Centropages	Centropages_hamatus	0	0	0	0	0	0	0	0	0	0	0	0	0	0	0	0	0	0	0	0	0	0	0	0	0	0	0	0	0	0	0	0	0	0	0	0	0	0	0	0	0	0	0	0
X1887	Arthropoda	Crustacea	Maxillopoda	Centropages	Centropages_hamatus	0	0	0	0	0	0	0	0	1	0	2	0	0	0	0	0	0	0	0	0	1	0	0	0	0	0	0	0	1	0	0	0	0	0	0	0	0	0	0	0	0	1	0	0
X2435	Arthropoda	Crustacea	Maxillopoda	Centropages	Centropages_hamatus	0	0	0	0	0	0	0	0	0	0	0	0	0	0	0	0	0	0	0	0	0	0	0	0	0	0	0	0	0	0	0	0	0	0	0	0	0	0	0	0	0	0	0	0
X2689	Arthropoda	Crustacea	Maxillopoda	Centropages	Centropages_hamatus	0	0	0	0	0	0	0	0	0	0	0	0	0	0	0	0	0	0	0	0	0	0	0	0	0	0	0	0	0	0	0	0	0	0	0	0	0	0	0	0	0	0	0	0
X2914	Arthropoda	Crustacea	Maxillopoda	Centropages	Centropages_hamatus	0	0	0	0	0	0	0	0	0	0	0	0	0	0	0	0	0	0	0	0	0	0	0	0	0	0	0	0	0	0	0	0	0	0	0	0	0	0	0	0	0	0	0	0
X2915	Arthropoda	Crustacea	Maxillopoda	Centropages	NA	0	0	0	0	0	0	0	0	0	0	1	0	0	0	0	0	0	0	0	0	0	0	0	0	0	0	0	0	0	0	0	0	0	0	0	0	0	0	0	0	0	0	0	0
X3441	Arthropoda	Crustacea	Maxillopoda	Centropages	Centropages_hamatus	0	0	0	0	0	1	0	0	0	0	0	0	0	0	0	0	0	0	0	0	0	0	0	0	0	0	0	0	0	0	0	0	0	0	0	0	0	0	0	0	0	0	0	0
X530	Arthropoda	Crustacea	Maxillopoda	Centropages	Centropages_typicus	0	0	1	0	0	0	1	25	0	0	1	0	0	0	0	0	0	0	0	0	0	0	0	0	0	0	0	0	9	0	0	0	0	0	0	0	0	0	0	0	0	0	0	0
X613	Arthropoda	Crustacea	Maxillopoda	Centropages	Centropages_hamatus	0	0	0	0	0	0	0	0	0	0	0	0	0	0	0	0	0	0	0	0	0	0	0	0	0	0	0	0	0	0	0	0	0	0	0	0	0	0	0	0	0	0	0	0
X1511	Arthropoda	Crustacea	Maxillopoda	Corycaeus	Corycaeus_speciosus	0	0	0	0	0	1	0	0	0	0	0	0	0	0	0	0	0	0	0	0	0	0	0	0	0	0	0	0	0	0	0	0	0	0	0	0	0	0	0	0	0	0	0	0
X1717	Arthropoda	Crustacea	Maxillopoda	Corycaeus	Corycaeus_speciosus	0	0	0	0	0	0	0	3	0	0	0	0	0	0	0	0	0	0	0	0	0	0	0	0	0	0	0	0	0	0	0	0	0	0	0	0	0	0	0	0	0	0	0	0
X2472	Arthropoda	Crustacea	Maxillopoda	Corycaeus	Corycaeus_speciosus	0	0	0	0	0	0	0	0	0	0	0	0	0	0	0	0	0	0	0	0	0	1	0	0	0	0	0	0	0	1	0	0	0	0	0	0	0	0	0	0	0	0	0	0
X3057	Arthropoda	Crustacea	Maxillopoda	Corycaeus	Corycaeus_speciosus	0	0	0	0	0	1	0	0	0	0	0	0	0	0	0	0	0	0	0	0	0	0	0	0	0	0	0	0	0	0	0	0	0	0	0	0	0	0	0	0	0	0	0	0
X47	Arthropoda	Crustacea	Maxillopoda	Corycaeus	Corycaeus_speciosus	6	1	2	0	1	35	2	32	2	0	0	4	0	8	0	0	0	0	5	0	0	0	0	0	0	0	0	0	0	4	4	0	0	0	0	0	0	0	0	0	0	0	0	0
X708	Arthropoda	Crustacea	Maxillopoda	Corycaeus	Corycaeus_speciosus	0	0	0	0	0	4	0	1	0	0	0	0	0	0	0	0	0	0	0	0	0	0	0	0	0	0	0	0	0	0	0	0	0	0	0	0	0	0	0	0	0	0	0	0
X335	Arthropoda	Crustacea	Malacostraca	Crangon	Crangon_crangon	2	0	0	0	0	0	0	0	0	0	0	0	0	0	0	0	0	0	0	0	0	0	0	0	0	1	0	0	0	0	0	0	0	0	5	0	0	0	0	0	0	0	0	0
X3759	Arthropoda	Crustacea	Crustacea_X	Crustacea_XX	Crustacea_XX_sp.	0	0	0	0	0	0	0	0	0	0	0	0	0	0	0	0	0	0	0	0	0	0	0	0	0	0	0	0	0	0	0	0	0	0	0	0	0	0	0	0	0	0	0	0
X3793	Arthropoda	Crustacea	Maxillopoda	Diarthrodes	Diarthrodes_sp.	0	0	0	0	0	0	0	0	0	0	0	0	0	0	0	0	0	0	0	0	0	0	0	0	0	0	0	0	0	0	0	0	0	0	0	0	0	0	0	0	0	0	0	0
X1911	Arthropoda	Crustacea	Malacostraca	Galathea	Galathea_rostrata	0	3	0	0	2	0	0	0	0	13	0	0	0	4	7	0	0	1	0	0	0	0	0	0	0	0	0	0	0	0	0	0	0	0	1	0	0	0	2	0	0	0	1	0
X1890	Arthropoda	Crustacea	Maxillopoda	Harpacticus	Harpacticus_sp.	0	0	0	0	0	0	0	0	0	0	0	0	0	0	0	0	0	0	0	0	3	0	0	0	0	1	0	0	1	0	0	0	0	0	0	0	0	0	0	0	0	0	0	0
X314	Arthropoda	Crustacea	Maxillopoda	Harpacticus	Harpacticus_sp.	0	2	0	0	4	0	3	0	0	0	0	0	0	0	0	0	0	1	0	0	43	0	9	7	0	24	0	0	41	0	0	0	0	1	0	0	0	0	2	0	0	3	0	0
X2890	Arthropoda	Crustacea	Ostracoda	Hemicytherura	Hemicytherura_kajiyamai	0	0	0	0	0	0	0	0	0	0	0	0	0	0	0	0	0	0	0	0	0	0	0	0	0	0	0	0	0	0	0	0	0	0	0	0	0	0	0	0	0	0	0	0
X2065	Arthropoda	Crustacea	Ostracoda	Howeina	Howeina_sp.	0	0	0	0	0	0	0	0	0	0	0	0	0	0	0	0	0	0	0	0	0	0	0	0	0	0	0	0	0	0	0	0	0	0	0	0	0	0	0	0	0	0	0	0
X2657	Arthropoda	Crustacea	Ostracoda	Leptocythere	Leptocythere_lacertosa	0	0	0	0	0	0	0	0	0	0	0	0	0	0	0	0	0	0	0	0	0	0	0	0	0	0	0	0	0	0	0	0	0	0	0	0	0	0	0	0	0	0	0	0
X3477	Arthropoda	Crustacea	Maxillopoda	Lichomolgus	Lichomolgus_canui	0	0	0	0	0	0	0	0	0	0	0	0	0	0	0	0	0	0	0	0	0	0	0	0	0	0	0	0	0	0	0	0	0	0	0	0	0	0	0	0	0	0	0	0
X1772	Arthropoda	Crustacea	Ostracoda	Loxocorniculum	Loxocorniculum_mutsuense	0	0	0	0	0	0	0	0	0	0	0	0	0	0	0	0	0	0	0	0	0	0	0	0	0	0	0	0	0	0	0	0	0	0	0	0	0	0	0	0	0	0	0	0
X3891	Arthropoda	Crustacea	Maxillopoda	Mytilicola	Mytilicola_orientalis	0	0	0	0	0	0	0	0	0	0	0	0	0	0	0	0	0	0	0	0	0	0	0	0	0	0	0	0	0	0	0	0	0	0	0	0	0	0	0	0	0	0	0	0
X2951	Arthropoda	Chelicerata	Arachnida	NA	NA	0	0	0	0	0	0	0	0	0	0	0	0	0	0	0	0	0	0	0	0	0	0	0	0	0	0	0	0	0	0	0	0	0	0	0	0	0	0	0	0	0	0	0	0
X336	Arthropoda	Chelicerata	Arachnida	NA	NA	0	0	0	0	0	0	0	0	0	0	0	0	0	0	0	0	0	0	0	0	0	0	0	0	0	0	0	0	0	0	0	0	0	0	0	0	0	0	0	0	0	0	0	0
X771	Arthropoda	Chelicerata	Arachnida	NA	NA	1	0	0	0	0	0	0	0	0	0	0	0	0	0	0	0	0	0	0	0	0	0	3	0	0	0	0	0	0	0	0	0	0	0	0	1	0	0	0	0	0	0	0	0
X1024	Arthropoda	Crustacea	Malacostraca	NA	NA	1	0	0	0	0	0	0	1	0	0	1	0	6	0	1	0	0	0	0	0	0	0	2	1	0	2	1	0	2	0	0	0	0	0	0	0	0	0	1	3	0	0	140	1
X1041	Arthropoda	Crustacea	Maxillopoda	NA	NA	0	0	0	0	0	0	0	1	0	4	0	0	0	0	0	0	0	0	0	0	0	0	0	0	0	0	0	0	0	1	0	4	0	0	0	2	0	0	0	0	0	0	0	0
X1067	Arthropoda	Crustacea	Maxillopoda	NA	NA	0	0	0	0	0	0	0	0	0	0	0	0	0	0	0	0	0	0	0	0	0	0	0	0	0	0	0	0	0	0	0	0	0	0	0	0	0	0	0	0	0	0	0	0
X1095	Arthropoda	Crustacea	Maxillopoda	NA	NA	0	0	0	0	0	0	0	0	0	0	0	0	0	0	0	0	0	0	0	0	0	0	0	0	0	0	0	0	0	0	0	0	0	0	0	0	0	0	0	0	0	0	0	0
X1122	Arthropoda	Crustacea	Maxillopoda	NA	NA	0	0	0	0	0	0	0	0	0	1	0	0	0	0	0	0	0	0	0	0	0	0	0	0	0	0	0	0	0	0	1	0	0	0	0	0	0	0	0	0	0	0	0	0
X122	Arthropoda	Crustacea	Maxillopoda	NA	NA	0	0	0	0	0	0	0	0	0	0	0	0	0	0	0	0	0	0	0	0	0	0	0	0	0	0	0	0	0	0	0	0	0	0	0	0	0	0	0	0	0	0	0	0
X1227	Arthropoda	Crustacea	Maxillopoda	NA	NA	0	0	0	0	0	0	0	0	0	0	0	0	0	0	0	0	0	0	0	0	0	0	0	0	0	0	0	0	0	0	0	0	0	0	0	0	0	0	0	0	0	0	0	0
X1263	Arthropoda	Crustacea	Maxillopoda	NA	NA	0	0	0	0	0	0	0	0	0	0	0	0	0	0	0	0	0	0	0	0	0	0	0	0	0	0	0	0	0	0	0	0	0	0	0	0	0	0	0	0	0	1	0	0
X1513	Arthropoda	Crustacea	Maxillopoda	NA	NA	0	0	0	0	0	0	0	0	0	0	0	0	0	0	0	0	0	0	0	0	0	0	0	0	0	0	0	0	0	0	0	0	0	0	0	0	0	0	0	0	0	0	0	0
X1594	Arthropoda	Crustacea	Maxillopoda	NA	NA	0	0	0	0	0	0	0	0	0	0	0	0	0	0	0	0	0	0	0	0	0	0	0	0	0	0	0	0	0	0	0	0	0	0	0	0	0	0	0	0	0	0	0	0
X165	Arthropoda	Crustacea	Maxillopoda	NA	NA	0	1	0	0	0	0	0	0	0	1	0	0	0	0	0	0	0	0	0	0	0	0	2	0	0	0	0	0	0	2	0	2	0	1	0	0	0	0	1	0	0	2	0	0
X1701	Arthropoda	Crustacea	Maxillopoda	NA	NA	0	0	0	0	0	0	0	0	0	0	0	0	0	0	0	0	0	0	0	0	0	0	0	0	0	0	0	0	0	0	0	0	0	0	0	0	0	0	0	0	0	0	0	0
X1736	Arthropoda	Crustacea	Maxillopoda	NA	NA	0	0	0	0	0	0	0	0	0	0	0	0	0	0	0	1	0	0	0	0	0	0	0	0	0	0	0	0	0	0	0	0	0	0	0	0	0	0	0	0	0	0	0	0
X1796	Arthropoda	Crustacea	Maxillopoda	NA	NA	0	0	0	0	0	0	0	0	0	0	0	0	0	0	0	0	0	0	0	0	0	0	0	0	0	0	0	0	0	0	0	0	0	0	0	0	0	0	0	0	0	0	0	0
X1804	Arthropoda	Crustacea	Maxillopoda	NA	NA	0	0	0	0	0	0	3	5	0	0	0	0	0	0	0	1	0	0	0	0	0	0	0	0	0	0	0	0	0	0	0	0	0	0	0	0	0	0	0	0	0	0	0	0
X1840	Arthropoda	Crustacea	Maxillopoda	NA	NA	0	0	0	0	0	1	0	0	0	0	0	0	0	0	0	0	0	0	0	0	0	0	0	0	0	0	0	0	0	0	0	0	0	0	0	0	0	0	0	0	0	0	0	0
X2064	Arthropoda	Crustacea	Maxillopoda	NA	NA	0	0	0	0	0	0	0	0	0	0	0	0	0	0	0	0	0	0	0	0	0	0	0	0	0	0	0	0	0	0	0	0	0	0	0	0	0	0	0	0	0	0	0	0
X2082	Arthropoda	Crustacea	Maxillopoda	NA	NA	0	0	0	0	0	0	0	0	0	0	0	0	0	0	0	0	0	0	0	0	0	0	0	0	0	0	0	0	0	0	0	0	0	0	0	0	0	0	0	0	0	0	0	0
X2101	Arthropoda	Crustacea	Maxillopoda	NA	NA	0	0	0	0	0	0	0	0	0	0	0	0	0	0	0	0	0	0	0	0	0	0	0	0	0	0	0	0	0	0	0	0	0	0	0	0	0	0	0	0	0	0	0	0
X2114	Arthropoda	Crustacea	Maxillopoda	NA	NA	0	0	0	0	0	0	0	0	0	1	0	0	0	0	0	0	0	0	0	0	0	0	0	0	0	0	0	0	0	0	0	0	0	0	0	0	0	0	0	0	0	0	0	0
X2173	Arthropoda	Crustacea	Maxillopoda	NA	NA	0	0	0	0	0	0	0	0	0	0	0	0	0	0	0	0	0	0	0	0	0	0	0	0	0	0	0	0	0	0	0	0	0	0	0	0	0	0	0	0	0	0	0	0
X2227	Arthropoda	Crustacea	Maxillopoda	NA	NA	0	0	0	0	0	0	0	0	0	0	0	0	0	0	0	0	0	0	0	0	0	0	0	0	0	0	0	0	0	0	0	0	0	0	0	0	0	0	0	0	0	0	0	0
X2236	Arthropoda	Crustacea	Maxillopoda	NA	NA	0	0	0	0	0	0	0	0	0	0	0	0	0	0	0	0	0	0	0	0	0	0	0	0	0	0	0	0	0	0	0	0	0	0	0	0	0	0	0	0	0	0	0	0
X2273	Arthropoda	Crustacea	Maxillopoda	NA	NA	0	0	0	0	0	0	0	0	0	0	0	0	0	0	0	0	0	0	0	0	0	0	0	0	0	0	0	0	0	0	0	0	0	0	0	0	0	0	0	0	0	0	0	0
X232	Arthropoda	Crustacea	Maxillopoda	NA	NA	0	0	0	0	1	0	0	0	0	0	0	0	7	0	0	0	0	0	0	0	0	0	0	0	0	1	0	0	0	0	0	1	0	0	0	0	0	0	0	0	0	0	0	0
X2398	Arthropoda	Crustacea	Maxillopoda	NA	NA	0	0	0	0	0	0	0	0	1	1	0	0	0	0	0	0	0	0	0	0	0	0	0	0	0	0	0	0	0	3	0	0	0	0	0	1	0	0	0	0	0	0	0	0
X2428	Arthropoda	Crustacea	Maxillopoda	NA	NA	0	0	0	0	1	0	0	0	0	0	0	0	0	0	0	0	0	0	0	0	0	0	0	0	0	0	0	0	0	0	0	0	0	0	0	0	0	0	0	0	0	0	0	0
X2516	Arthropoda	Crustacea	Maxillopoda	NA	NA	0	0	0	0	0	0	0	0	0	0	0	0	0	0	0	0	0	0	0	0	0	0	0	0	0	0	0	0	0	0	0	0	1	0	0	0	0	0	0	0	0	0	0	0
X2637	Arthropoda	Crustacea	Maxillopoda	NA	NA	0	0	0	0	0	0	0	0	0	0	0	0	0	0	0	0	0	0	0	0	0	0	0	0	0	0	0	0	0	0	0	0	0	0	1	0	0	0	0	0	0	1	0	0
X2683	Arthropoda	Crustacea	Maxillopoda	NA	NA	0	0	0	0	0	0	0	3	0	0	0	0	0	0	0	0	0	0	0	0	0	0	0	0	0	0	0	0	2	0	0	0	0	0	0	0	0	0	0	0	0	0	0	0
X2688	Arthropoda	Crustacea	Maxillopoda	NA	NA	0	0	0	0	0	0	0	0	0	0	0	0	0	0	0	0	0	0	0	0	0	0	0	0	0	0	0	0	0	0	0	0	0	0	0	0	0	0	0	0	0	0	0	0
X2697	Arthropoda	Crustacea	Malacostraca	NA	NA	0	0	0	2	4	1	0	0	0	0	0	0	0	2	0	1	0	0	1	0	0	0	0	0	1	0	0	0	0	0	0	0	0	4	3	0	0	0	0	0	0	2	2	0
X2772	Arthropoda	Crustacea	Maxillopoda	NA	NA	0	0	0	0	0	0	0	0	0	0	0	0	0	0	0	0	0	0	0	0	0	0	0	0	0	0	0	0	0	0	0	0	0	0	0	0	0	0	0	0	0	0	0	0
X2876	Arthropoda	Crustacea	Maxillopoda	NA	NA	0	0	0	0	0	0	0	0	0	0	0	0	0	0	0	0	0	0	0	0	0	0	0	0	0	0	0	0	0	0	0	0	0	0	0	1	0	0	0	0	0	0	0	0
X3027	Arthropoda	Crustacea	Maxillopoda	NA	NA	0	0	0	0	0	0	0	0	0	0	0	0	0	0	0	0	0	0	0	0	0	0	0	0	0	0	0	0	0	0	0	0	0	0	0	0	0	0	0	0	0	1	0	0
X3105	Arthropoda	Crustacea	Maxillopoda	NA	NA	0	0	0	0	0	0	0	0	0	0	0	0	0	0	0	0	0	0	0	0	0	0	0	0	0	0	0	0	0	0	0	0	0	0	0	0	0	0	0	0	0	0	0	0
X3111	Arthropoda	Crustacea	Maxillopoda	NA	NA	0	0	0	0	0	0	0	0	0	0	0	0	0	0	0	0	0	0	0	0	0	0	0	0	0	0	0	0	0	0	0	0	0	0	0	0	0	0	0	0	0	0	0	0
X3139	Arthropoda	Crustacea	Maxillopoda	NA	NA	0	0	0	0	0	0	0	0	0	2	0	0	1	0	0	0	0	0	0	0	1	0	0	0	0	1	0	0	0	0	0	2	0	0	0	0	0	0	0	0	0	0	0	0
X3191	Arthropoda	Crustacea	Maxillopoda	NA	NA	0	0	0	0	0	0	0	0	0	0	0	0	0	0	0	0	0	0	0	0	0	0	0	0	0	0	0	0	0	0	0	0	0	0	0	0	0	0	0	0	0	0	0	0
X325	Arthropoda	Crustacea	Maxillopoda	NA	NA	0	0	0	0	0	0	0	0	0	0	0	0	0	0	0	0	0	0	0	0	0	0	0	0	0	0	0	0	0	0	0	0	0	0	0	0	0	0	0	0	0	0	0	0
X3311	Arthropoda	Crustacea	Maxillopoda	NA	NA	0	0	0	0	0	0	0	0	0	0	0	0	0	0	0	0	0	0	0	0	0	0	0	0	0	0	0	0	0	0	0	0	0	0	0	0	0	0	0	0	0	0	0	0
X3320	Arthropoda	Crustacea	Maxillopoda	NA	NA	0	0	0	0	0	0	0	1	1	1	0	0	0	0	0	0	0	0	0	0	0	0	0	0	0	0	0	0	0	0	0	0	0	0	0	0	0	0	0	0	0	0	0	0
X3431	Arthropoda	Crustacea	NA	NA	NA	0	0	0	0	0	0	0	2	0	1	0	0	0	0	0	0	0	0	0	0	0	0	0	0	0	0	0	0	0	0	0	0	0	2	0	0	0	0	1	0	0	0	0	0
X3466	Arthropoda	Crustacea	Maxillopoda	NA	NA	0	0	0	0	0	0	0	0	0	0	0	0	0	0	0	0	0	0	0	0	0	0	0	0	0	0	0	0	0	0	0	0	0	0	0	0	0	0	0	0	0	0	0	0
X3513	Arthropoda	Crustacea	Maxillopoda	NA	NA	0	0	0	0	0	0	0	0	0	0	0	0	0	0	0	0	0	0	0	0	0	0	0	0	0	0	0	0	0	0	0	0	0	0	0	0	0	0	0	0	0	0	0	0
X3538	Arthropoda	Crustacea	Maxillopoda	NA	NA	0	0	0	0	0	0	0	0	0	0	0	0	0	0	0	0	0	0	0	0	0	0	0	0	0	0	0	0	0	0	0	0	0	0	0	0	0	0	0	0	0	0	0	0
X3679	Arthropoda	Crustacea	Maxillopoda	NA	NA	0	0	0	0	0	0	0	0	0	0	0	0	0	0	0	0	0	0	0	0	0	0	0	0	0	0	1	0	0	0	0	0	0	0	0	0	0	0	0	0	0	0	0	0
X373	Arthropoda	Crustacea	Maxillopoda	NA	NA	0	0	0	0	0	0	0	2	1	2	0	1	0	0	0	0	0	0	0	0	0	1	0	0	0	1	0	0	0	2	0	4	0	0	1	6	0	1	0	0	0	0	0	0
X3763	Arthropoda	Crustacea	Maxillopoda	NA	NA	0	0	0	0	0	0	0	0	0	0	0	0	0	0	0	0	0	0	0	0	0	0	0	0	0	0	0	0	0	0	0	0	0	0	0	0	0	0	0	0	0	0	0	0
X3799	Arthropoda	Crustacea	Maxillopoda	NA	NA	0	0	0	0	0	0	0	0	0	0	0	0	0	0	0	0	0	0	0	1	0	0	0	0	0	0	0	0	0	0	0	0	0	0	0	0	0	0	0	0	0	0	0	0
X3816	Arthropoda	Crustacea	Ostracoda	NA	NA	0	0	0	0	0	0	0	0	0	0	0	0	0	0	0	0	0	0	0	0	0	0	0	0	0	0	0	0	0	0	0	0	0	0	0	0	0	0	0	0	0	0	0	0
X3820	Arthropoda	Crustacea	Maxillopoda	NA	NA	0	0	0	0	0	0	0	0	0	0	0	0	0	0	0	0	0	0	0	0	0	0	0	0	0	0	0	0	0	0	0	0	0	0	0	0	0	0	0	0	0	0	0	0
X3999	Arthropoda	Crustacea	Maxillopoda	NA	NA	0	0	0	0	0	0	0	0	0	0	0	0	0	0	0	0	0	0	0	0	0	0	0	0	0	0	0	0	0	0	0	0	0	0	0	0	0	0	0	0	0	0	0	0
X4034	Arthropoda	Crustacea	Maxillopoda	NA	NA	0	0	0	0	0	0	0	0	0	1	0	0	0	0	0	0	0	0	0	0	0	0	0	0	0	0	0	0	0	0	0	0	0	0	0	0	0	0	0	0	0	0	0	0
X4083	Arthropoda	Crustacea	Ostracoda	NA	NA	0	0	0	0	0	0	0	0	0	0	0	0	0	0	0	0	0	0	0	0	0	0	0	0	0	0	0	0	0	0	0	0	0	0	0	0	0	0	0	0	0	0	0	0
X416	Arthropoda	Crustacea	Maxillopoda	NA	NA	0	0	0	0	0	0	0	1	0	4	0	0	0	0	0	0	0	0	0	0	0	0	0	0	0	1	0	0	2	2	0	0	0	0	0	3	0	0	0	0	0	1	1	2
X4162	Arthropoda	Crustacea	Maxillopoda	NA	NA	0	0	0	0	0	0	0	0	0	0	0	0	0	0	0	0	0	0	0	0	0	0	0	0	0	0	0	0	0	0	0	0	0	0	0	0	0	0	0	0	0	0	0	0
X4281	Arthropoda	Crustacea	Maxillopoda	NA	NA	0	0	0	0	0	0	0	0	0	0	0	0	0	0	0	0	0	0	0	0	0	0	0	0	0	0	0	0	0	0	0	0	0	0	0	0	0	0	0	0	0	0	0	0
X4288	Arthropoda	Crustacea	Maxillopoda	NA	NA	0	0	0	0	0	0	0	0	0	0	0	0	0	0	0	0	0	0	0	0	0	0	0	0	0	0	0	0	0	0	0	0	0	0	0	0	0	0	0	0	0	0	0	0
X430	Arthropoda	Crustacea	Malacostraca	NA	NA	0	0	0	0	0	0	0	0	0	0	0	0	0	0	0	0	0	0	0	0	0	0	1	0	0	0	0	0	0	0	0	0	0	0	0	0	0	0	0	0	0	0	0	0
X4301	Arthropoda	Crustacea	Maxillopoda	NA	NA	0	0	0	0	0	0	0	0	0	0	0	0	0	0	0	0	0	0	0	0	0	0	0	0	0	0	0	0	0	0	0	0	0	0	0	0	0	0	0	0	0	0	0	0
X569	Arthropoda	Crustacea	Maxillopoda	NA	NA	6	0	0	0	0	0	0	1	0	0	0	0	0	0	0	0	0	0	0	0	0	0	0	0	0	0	0	0	0	0	0	0	0	0	0	0	0	0	0	0	0	0	0	0
X603	Arthropoda	Crustacea	Maxillopoda	NA	NA	0	2	0	0	0	0	0	0	0	0	0	0	0	0	0	0	0	0	0	0	0	0	0	0	0	0	0	0	0	0	0	0	0	0	0	0	0	0	0	0	0	0	0	0
X662	Arthropoda	Crustacea	Maxillopoda	NA	NA	0	0	0	0	0	0	0	0	0	0	0	0	0	0	0	0	0	0	0	0	0	0	0	0	0	0	0	0	0	0	0	0	0	0	0	0	0	0	1	0	0	0	0	0
X723	Arthropoda	Crustacea	Maxillopoda	NA	NA	0	0	0	0	0	0	0	0	0	0	0	0	0	0	0	0	0	0	0	0	0	0	0	0	0	0	0	0	0	0	0	0	0	0	0	0	0	0	0	0	0	0	0	0
X752	Arthropoda	Crustacea	Maxillopoda	NA	NA	0	0	0	0	0	0	0	0	0	0	0	0	0	0	0	0	0	0	0	0	0	0	0	0	0	0	0	0	0	0	0	0	0	0	0	0	0	0	0	0	0	0	0	0
X880	Arthropoda	Crustacea	Maxillopoda	NA	NA	0	0	0	0	1	0	0	0	0	0	2	0	0	0	0	0	0	0	0	0	0	0	0	0	0	0	0	0	0	0	0	0	0	0	0	0	0	0	0	0	0	0	0	0
X938	Arthropoda	Crustacea	Maxillopoda	NA	NA	0	0	0	0	0	0	0	0	0	0	0	0	0	0	0	0	0	0	0	0	0	0	0	0	0	0	0	0	0	0	0	0	0	0	0	0	0	0	0	0	0	0	0	0
X950	Arthropoda	Crustacea	Maxillopoda	NA	NA	0	0	0	0	0	0	0	0	1	0	0	0	0	0	0	0	0	0	0	0	0	0	0	0	0	0	0	0	0	0	0	0	0	0	0	0	0	0	0	0	0	0	0	0
X997	Arthropoda	Crustacea	Maxillopoda	NA	NA	0	0	0	0	0	0	0	0	0	0	0	0	0	0	0	0	0	0	0	0	0	0	0	0	0	0	0	0	0	0	0	0	0	0	0	0	0	0	0	0	0	0	0	0
X2743	Arthropoda	NA	NA	NA	NA	0	0	0	0	0	0	0	0	0	0	0	0	0	0	0	0	0	0	0	0	0	0	0	0	0	0	0	0	0	0	0	0	0	0	0	0	0	0	1	0	0	0	0	0
X3347	Arthropoda	NA	NA	NA	NA	0	0	0	0	0	0	0	0	0	0	0	0	0	0	0	0	0	0	0	0	0	0	0	0	0	0	0	0	0	0	0	0	0	0	0	0	0	0	0	0	0	0	0	0
X3643	Arthropoda	NA	NA	NA	NA	0	0	0	0	0	0	0	0	0	0	0	0	0	0	0	0	0	0	0	0	0	0	0	0	0	0	0	0	0	0	0	0	0	0	0	0	0	0	0	0	0	0	0	0
X3852	Arthropoda	NA	NA	NA	NA	0	0	0	0	0	0	0	0	0	0	0	0	0	0	0	0	0	0	1	0	0	0	0	0	0	0	0	0	0	0	0	0	0	0	0	0	0	0	0	0	0	0	0	0
X4000	Arthropoda	NA	NA	NA	NA	0	0	0	0	0	0	0	0	0	0	0	0	0	0	0	0	0	0	0	0	0	0	0	0	0	0	0	0	0	0	0	0	0	0	0	0	0	0	0	0	0	0	0	0
X2001	Arthropoda	Crustacea	Maxillopoda	Oithona	Oithona_similis	0	0	0	0	0	0	0	0	0	0	0	0	0	0	0	0	0	0	0	0	0	0	0	0	0	0	0	0	0	0	0	0	0	0	0	0	0	0	0	0	0	0	0	0
X2626	Arthropoda	Crustacea	Maxillopoda	Oithona	Oithona_similis	0	0	0	0	0	0	0	0	0	0	0	0	0	0	0	0	0	0	0	0	0	0	0	0	0	0	0	0	0	0	0	0	0	0	0	0	0	0	0	0	0	0	0	0
X267	Arthropoda	Crustacea	Maxillopoda	Oithona	Oithona_sp.	0	0	0	0	0	0	0	0	0	0	0	0	0	0	0	0	0	0	0	0	0	0	0	0	0	0	0	0	0	0	0	0	0	0	0	0	0	0	0	0	0	0	0	0
X45	Arthropoda	Crustacea	Maxillopoda	Oithona	Oithona_sp.	0	0	1	0	0	0	0	0	0	0	0	0	0	0	0	0	0	0	0	0	0	1	0	0	0	2	0	0	5	0	11	0	0	0	0	0	0	0	0	0	2	1	5	17
X1010	Arthropoda	Crustacea	Maxillopoda	Paracalanus	Paracalanus_parvus	0	0	0	0	0	1	0	1	0	0	0	1	0	0	0	1	0	0	0	0	0	0	0	0	0	0	0	0	0	1	0	0	0	0	0	0	0	0	0	0	0	0	0	0
X1027	Arthropoda	Crustacea	Maxillopoda	Paracalanus	Paracalanus_parvus	0	0	0	0	0	0	0	0	0	0	0	0	0	0	0	0	0	0	0	0	0	0	0	0	0	0	0	0	0	0	0	0	0	0	0	0	0	0	0	0	0	0	0	0
X1029	Arthropoda	Crustacea	Maxillopoda	Paracalanus	NA	0	0	1	0	0	1	0	0	1	0	0	0	0	0	0	0	0	0	0	0	0	1	0	0	0	0	0	0	0	0	0	0	0	0	0	0	0	0	0	0	0	0	0	0
X1410	Arthropoda	Crustacea	Maxillopoda	Paracalanus	Paracalanus_parvus	0	0	0	0	0	0	0	0	0	0	0	0	0	0	0	0	0	0	0	0	0	0	0	0	0	0	0	0	0	0	0	0	0	0	0	0	0	0	0	0	0	0	0	0
X1525	Arthropoda	Crustacea	Maxillopoda	Paracalanus	NA	0	0	0	0	0	1	0	0	0	0	0	0	0	0	0	0	0	0	0	0	0	0	0	0	0	0	0	0	0	0	1	0	0	1	0	0	0	0	0	0	0	0	0	0
X1739	Arthropoda	Crustacea	Maxillopoda	Paracalanus	NA	0	0	0	0	0	0	0	0	0	0	0	0	0	0	0	0	0	0	0	0	0	0	0	0	0	0	0	0	0	0	0	0	0	0	0	0	0	0	0	0	0	0	1	0
X1740	Arthropoda	Crustacea	Maxillopoda	Paracalanus	Paracalanus_parvus	0	0	0	0	0	0	0	0	0	0	0	0	0	0	0	0	0	0	0	0	0	0	0	0	0	0	0	0	0	0	0	0	0	0	0	0	0	0	0	0	0	0	0	0
X1897	Arthropoda	Crustacea	Maxillopoda	Paracalanus	NA	0	0	0	0	0	2	0	3	1	0	1	0	1	0	1	1	0	1	0	0	0	1	0	0	0	1	0	0	0	0	0	0	0	0	0	0	0	0	0	0	0	1	0	0
X1920	Arthropoda	Crustacea	Maxillopoda	Paracalanus	NA	0	0	0	0	0	0	0	0	0	0	0	0	0	0	0	0	0	0	0	0	0	0	0	0	0	0	0	0	0	0	0	0	0	0	0	0	0	0	0	0	0	0	0	0
X1925	Arthropoda	Crustacea	Maxillopoda	Paracalanus	Paracalanus_parvus	0	0	0	0	0	0	0	0	0	0	0	0	0	0	0	0	0	0	0	0	0	0	0	0	0	0	0	0	0	0	0	0	0	0	0	0	0	0	0	0	0	0	0	0
X2073	Arthropoda	Crustacea	Maxillopoda	Paracalanus	NA	0	0	0	0	0	0	0	0	0	0	0	0	0	0	0	0	0	0	0	0	0	0	0	0	0	0	0	0	0	0	0	0	0	0	0	0	0	0	0	0	0	0	0	0
X2080	Arthropoda	Crustacea	Maxillopoda	Paracalanus	NA	0	0	0	0	0	0	0	0	0	0	0	0	0	0	0	0	0	0	0	0	0	0	0	0	0	0	0	0	0	0	0	0	0	0	0	0	0	0	0	0	0	0	0	0
X2514	Arthropoda	Crustacea	Maxillopoda	Paracalanus	NA	0	0	0	0	0	0	0	0	0	0	0	0	0	0	0	0	0	0	0	0	0	0	0	0	0	0	0	0	0	0	0	0	0	0	0	0	0	0	0	0	0	0	0	0
X2541	Arthropoda	Crustacea	Maxillopoda	Paracalanus	NA	0	0	0	0	0	1	0	0	0	0	0	0	0	0	0	0	0	0	0	0	0	0	0	0	0	0	0	0	0	0	0	0	0	0	0	0	0	0	0	0	0	0	0	0
X2636	Arthropoda	Crustacea	Maxillopoda	Paracalanus	NA	0	0	0	0	0	0	0	0	0	0	0	0	0	0	1	0	0	0	0	0	0	0	0	0	0	1	0	0	0	0	0	0	0	0	0	0	0	0	0	0	0	0	0	0
X2726	Arthropoda	Crustacea	Maxillopoda	Paracalanus	NA	1	0	0	0	0	4	1	0	0	0	0	0	0	0	1	0	0	0	0	0	0	0	0	0	0	0	0	0	0	0	0	0	0	0	0	0	0	0	0	0	0	0	0	0
X3225	Arthropoda	Crustacea	Maxillopoda	Paracalanus	NA	0	0	0	0	0	0	0	0	0	0	0	0	0	0	0	0	0	0	0	0	0	0	0	0	0	0	0	0	0	0	0	0	0	0	0	0	0	0	0	0	0	0	0	0
X3923	Arthropoda	Crustacea	Maxillopoda	Paracalanus	NA	0	0	0	0	0	0	0	0	0	0	1	0	0	0	0	0	0	0	0	0	0	0	0	0	0	0	0	0	0	0	0	0	0	0	0	0	0	0	0	0	0	0	0	0
X408	Arthropoda	Crustacea	Maxillopoda	Paracalanus	Paracalanus_parvus	0	0	0	0	0	1	1	0	0	0	0	1	0	0	0	0	0	0	0	0	0	1	1	0	0	1	0	1	0	0	0	0	0	0	0	0	0	0	0	0	0	0	0	0
X4138	Arthropoda	Crustacea	Maxillopoda	Paracalanus	NA	0	0	0	0	0	0	0	0	0	0	0	0	0	0	0	0	0	0	0	0	0	0	0	0	0	0	0	0	0	0	0	0	0	0	0	0	0	0	0	0	0	0	0	0
X4433	Arthropoda	Crustacea	Maxillopoda	Paracalanus	NA	0	0	0	0	0	0	0	0	0	0	0	0	0	0	0	0	0	0	0	0	0	0	0	0	0	0	0	0	1	0	0	0	0	0	0	0	0	0	0	0	0	0	0	0
X5	Arthropoda	Crustacea	Maxillopoda	Paracalanus	Paracalanus_parvus	80	10	106	9	18	916	123	198	122	11	199	122	77	38	162	119	31	33	13	3	17	98	154	32	14	408	60	149	362	55	508	305	2	14	2	20	3	21	19	5	136	124	160	80
X543	Arthropoda	Crustacea	Maxillopoda	Paracalanus	NA	0	0	0	0	0	1	0	0	0	0	0	0	0	0	0	0	0	0	0	0	0	0	0	0	0	0	0	0	0	0	0	0	0	0	0	0	0	0	0	0	0	0	0	0
X60	Arthropoda	Crustacea	Maxillopoda	Paracalanus	Paracalanus_parvus	3	0	5	0	1	57	9	28	5	0	8	6	4	1	6	8	2	1	0	0	0	5	7	0	1	14	6	14	13	4	25	15	0	0	1	0	0	4	2	0	5	4	1	4
X746	Arthropoda	Crustacea	Maxillopoda	Paracalanus	NA	0	0	0	0	0	2	0	1	0	0	0	0	1	0	0	0	0	0	0	0	0	0	0	0	0	0	0	0	0	0	0	0	0	0	0	0	0	0	0	0	0	0	0	0
X775	Arthropoda	Crustacea	Maxillopoda	Paracalanus	Paracalanus_parvus	0	0	0	0	0	0	0	0	0	0	0	1	0	1	0	0	0	0	0	0	0	0	0	0	0	0	0	0	0	0	0	2	0	0	0	0	0	0	0	0	0	2	0	0
X844	Arthropoda	Crustacea	Maxillopoda	Paracalanus	Paracalanus_parvus	0	0	0	0	0	0	0	0	0	0	1	0	0	0	0	0	0	0	0	0	0	0	0	0	0	0	0	0	0	0	0	0	0	0	0	0	0	0	0	0	0	0	0	0
X873	Arthropoda	Crustacea	Maxillopoda	Paracalanus	NA	0	0	0	0	0	0	0	0	0	0	0	0	0	0	0	0	0	0	0	0	0	0	0	0	0	0	0	0	0	0	0	0	0	0	0	0	0	0	0	0	0	0	0	0
X918	Arthropoda	Crustacea	Maxillopoda	Paracalanus	Paracalanus_parvus	0	0	0	0	0	0	0	0	0	0	0	0	0	0	0	0	0	0	0	0	0	0	0	0	0	0	0	0	0	0	0	0	0	0	0	0	0	0	0	0	0	0	0	0
X1	Arthropoda	Crustacea	Maxillopoda	Pseudocalanus	Pseudocalanus_elongatus	69	10	22	4	642	205	85	304	72	208	120	300	314	70	34	22	5	42	86	16410	135	129	250	1606	33	501	14	381	1455	322	1149	575	12906	234	95	60	9	36	148	28	18	3706	50	63
X1014	Arthropoda	Crustacea	Maxillopoda	Pseudocalanus	Pseudocalanus_moultoni	0	0	0	0	0	1	0	0	0	1	0	0	0	0	0	0	0	0	0	0	0	0	0	0	0	0	0	0	0	0	0	0	0	0	0	0	0	0	0	0	0	1	0	0
X1088	Arthropoda	Crustacea	Maxillopoda	Pseudocalanus	Pseudocalanus_elongatus	0	0	0	0	0	0	0	0	0	0	0	0	0	0	0	0	0	0	0	19	0	1	0	3	0	0	0	0	1	0	0	0	0	0	0	0	0	0	0	0	0	0	0	0
X1157	Arthropoda	Crustacea	Maxillopoda	Pseudocalanus	NA	0	0	0	0	0	0	0	0	0	0	0	0	0	0	0	0	0	0	0	0	0	0	0	0	0	0	0	0	0	1	1	0	0	0	0	0	0	0	0	0	0	0	0	0
X1305	Arthropoda	Crustacea	Maxillopoda	Pseudocalanus	NA	0	0	0	0	0	0	0	0	0	0	0	0	0	0	0	0	0	0	0	11	0	0	0	0	0	0	0	0	1	0	0	0	0	0	0	0	0	0	0	0	0	0	0	0
X1337	Arthropoda	Crustacea	Maxillopoda	Pseudocalanus	NA	0	0	0	0	0	0	0	0	0	0	0	0	0	0	0	0	0	0	0	0	0	0	0	0	0	0	0	0	0	0	0	0	0	0	0	0	0	0	0	0	0	0	0	0
X1354	Arthropoda	Crustacea	Maxillopoda	Pseudocalanus	Pseudocalanus_moultoni	0	0	0	0	0	1	0	0	0	0	0	0	0	0	0	0	0	0	0	1	0	0	0	0	0	0	0	0	1	0	0	0	1	1	0	0	0	0	0	0	0	3	0	0
X1413	Arthropoda	Crustacea	Maxillopoda	Pseudocalanus	Pseudocalanus_elongatus	0	0	0	0	0	0	0	0	0	0	0	0	0	0	0	0	0	0	0	0	0	0	0	0	0	0	0	0	0	0	0	0	0	0	0	0	0	0	0	0	0	0	0	0
X1433	Arthropoda	Crustacea	Maxillopoda	Pseudocalanus	Pseudocalanus_elongatus	0	0	0	0	0	0	0	0	0	0	0	0	0	0	0	0	0	0	0	0	0	0	0	0	0	0	0	0	0	0	0	0	0	0	0	0	0	0	0	0	0	0	0	0
X1444	Arthropoda	Crustacea	Maxillopoda	Pseudocalanus	Pseudocalanus_elongatus	1	0	0	0	0	0	0	0	0	0	0	0	0	0	0	0	0	0	0	4	0	1	0	0	0	0	0	0	0	0	0	0	1	0	0	0	0	0	0	0	0	0	0	0
X1466	Arthropoda	Crustacea	Maxillopoda	Pseudocalanus	NA	0	0	0	0	0	6	0	4	0	0	0	0	0	0	0	0	0	2	0	0	0	0	0	0	0	0	0	0	0	1	1	0	2	0	0	0	0	0	0	0	0	3	0	0
X1477	Arthropoda	Crustacea	Maxillopoda	Pseudocalanus	Pseudocalanus_elongatus	0	0	0	0	0	0	0	0	0	0	0	0	0	0	0	0	0	0	0	0	0	0	0	1	0	0	0	0	0	0	0	0	0	0	0	0	0	0	0	0	0	0	0	0
X1576	Arthropoda	Crustacea	Maxillopoda	Pseudocalanus	NA	0	0	0	0	0	0	0	0	0	0	0	0	0	0	0	0	0	0	0	0	0	0	0	0	0	0	0	0	0	0	0	0	0	0	0	0	0	0	0	0	0	0	0	0
X1581	Arthropoda	Crustacea	Maxillopoda	Pseudocalanus	NA	0	0	0	0	0	0	0	0	0	0	0	0	0	0	0	0	0	0	0	0	0	0	0	0	0	0	0	0	0	0	0	0	0	0	0	0	0	0	1	1	0	0	0	0
X1623	Arthropoda	Crustacea	Maxillopoda	Pseudocalanus	NA	0	0	0	0	0	0	0	0	0	0	0	0	1	0	0	0	0	0	0	1	1	0	1	0	0	0	0	0	1	0	0	0	0	2	0	0	0	0	0	0	0	5	0	0
X1697	Arthropoda	Crustacea	Maxillopoda	Pseudocalanus	Pseudocalanus_moultoni	0	0	0	0	0	0	0	0	0	0	0	0	0	0	0	0	0	0	0	3	0	0	0	0	0	0	0	0	0	0	0	0	1	0	0	0	0	0	0	0	0	0	0	0
X1707	Arthropoda	Crustacea	Maxillopoda	Pseudocalanus	NA	0	0	0	0	0	0	0	0	0	0	0	0	0	0	0	0	0	0	0	0	0	0	0	0	0	1	0	0	0	0	0	0	0	0	0	0	0	0	0	0	0	0	0	0
X177	Arthropoda	Crustacea	Maxillopoda	Pseudocalanus	Pseudocalanus_elongatus	0	0	0	0	0	0	0	1	0	1	0	0	0	0	0	0	0	0	0	19	0	0	0	0	0	0	0	0	3	1	0	0	7	1	0	0	0	0	1	0	0	3	0	0
X1787	Arthropoda	Crustacea	Maxillopoda	Pseudocalanus	Pseudocalanus_elongatus	0	0	0	0	0	0	0	0	0	0	0	0	0	0	0	0	0	0	0	5	0	0	0	0	0	0	0	0	0	0	0	0	0	0	0	0	0	0	0	0	0	0	0	0
X1794	Arthropoda	Crustacea	Maxillopoda	Pseudocalanus	Pseudocalanus_elongatus	0	0	0	0	0	0	0	0	0	0	0	0	0	0	0	0	0	0	0	0	0	0	0	0	0	0	0	0	0	0	0	0	0	0	0	0	0	0	0	0	0	0	0	0
X1798	Arthropoda	Crustacea	Maxillopoda	Pseudocalanus	Pseudocalanus_moultoni	0	0	0	0	1	0	0	0	0	0	0	0	0	0	0	0	0	0	0	1	0	0	0	0	0	0	0	0	0	0	0	0	0	0	0	0	0	0	0	0	0	0	0	0
X1853	Arthropoda	Crustacea	Maxillopoda	Pseudocalanus	Pseudocalanus_elongatus	0	0	0	0	0	0	0	0	0	0	0	0	0	0	0	0	0	0	0	0	0	0	0	0	0	0	0	0	0	0	0	0	0	0	0	0	0	0	0	0	0	0	0	0
X1891	Arthropoda	Crustacea	Maxillopoda	Pseudocalanus	Pseudocalanus_moultoni	0	0	0	0	0	0	0	0	0	0	0	0	0	0	0	0	0	0	0	0	0	0	0	0	0	0	0	0	0	0	0	0	1	0	0	0	0	0	0	0	0	0	0	0
X1898	Arthropoda	Crustacea	Maxillopoda	Pseudocalanus	Pseudocalanus_elongatus	0	0	0	0	0	0	0	3	1	0	1	0	1	0	0	0	0	0	0	0	0	0	0	0	0	0	0	0	1	0	0	0	0	0	0	0	0	0	0	0	0	6	0	0
X1908	Arthropoda	Crustacea	Maxillopoda	Pseudocalanus	Pseudocalanus_elongatus	0	0	0	0	0	0	0	0	0	0	0	0	0	0	0	0	0	0	0	0	0	0	0	0	0	0	0	0	0	0	0	0	0	0	0	0	0	0	0	0	0	0	0	0
X1944	Arthropoda	Crustacea	Maxillopoda	Pseudocalanus	NA	0	0	0	0	0	0	0	0	0	0	1	0	1	1	0	0	0	0	0	2	0	0	1	3	0	0	0	0	3	1	0	0	1	0	0	0	0	0	0	0	0	3	0	0
X1974	Arthropoda	Crustacea	Maxillopoda	Pseudocalanus	NA	0	0	0	0	1	0	0	1	0	0	0	0	0	0	0	0	0	0	0	0	0	0	0	0	0	0	0	0	0	0	0	0	0	0	0	0	0	0	0	0	0	0	0	0
X2057	Arthropoda	Crustacea	Maxillopoda	Pseudocalanus	NA	0	0	0	0	1	1	0	0	0	0	0	0	0	0	0	0	0	0	0	0	0	0	0	0	0	0	0	1	1	0	0	0	0	0	0	0	0	0	0	0	0	2	0	0
X2076	Arthropoda	Crustacea	Maxillopoda	Pseudocalanus	Pseudocalanus_moultoni	0	0	0	0	0	0	0	0	0	0	0	0	0	0	0	0	0	0	0	0	0	0	0	0	0	0	0	0	0	0	0	0	0	1	0	0	0	0	0	0	0	0	0	0
X211	Arthropoda	Crustacea	Maxillopoda	Pseudocalanus	Pseudocalanus_elongatus	0	0	0	0	1	2	0	1	0	0	0	0	0	0	0	0	0	0	0	26	0	0	0	3	0	0	0	1	3	0	3	0	15	0	0	0	0	0	0	0	0	10	0	0
X2139	Arthropoda	Crustacea	Maxillopoda	Pseudocalanus	NA	0	0	0	0	0	0	1	0	0	0	0	0	0	0	0	0	0	0	0	0	0	0	0	0	0	0	0	0	0	0	0	0	0	0	0	0	0	0	0	0	0	0	0	0
X2186	Arthropoda	Crustacea	Maxillopoda	Pseudocalanus	NA	0	0	0	0	0	0	0	0	0	0	0	0	0	0	0	0	0	0	0	0	0	0	0	0	0	0	0	0	0	0	0	0	0	0	0	0	0	0	0	0	0	0	0	0
X2211	Arthropoda	Crustacea	Maxillopoda	Pseudocalanus	Pseudocalanus_elongatus	0	0	0	0	0	0	0	0	0	0	0	0	0	0	0	0	0	0	0	0	0	0	0	0	0	0	0	0	0	0	0	0	0	0	0	0	0	0	0	0	0	0	0	0
X2287	Arthropoda	Crustacea	Maxillopoda	Pseudocalanus	NA	0	0	0	0	0	0	0	0	0	0	0	0	0	0	0	0	0	0	0	0	0	0	0	0	0	0	0	0	0	0	0	0	0	0	0	0	0	0	0	0	0	0	0	0
X2300	Arthropoda	Crustacea	Maxillopoda	Pseudocalanus	Pseudocalanus_elongatus	0	0	0	0	0	0	0	0	0	0	0	0	0	0	0	0	0	0	0	1	0	0	0	0	0	0	0	0	0	0	0	0	0	0	0	0	0	0	0	0	0	0	0	0
X2306	Arthropoda	Crustacea	Maxillopoda	Pseudocalanus	Pseudocalanus_elongatus	0	0	0	0	0	0	0	0	0	0	0	0	0	0	0	0	0	0	0	0	0	0	0	0	0	0	0	0	0	0	0	0	0	0	0	0	0	0	0	0	0	0	0	0
X2321	Arthropoda	Crustacea	Maxillopoda	Pseudocalanus	Pseudocalanus_elongatus	0	0	0	0	0	0	0	0	0	0	0	0	0	0	0	0	0	0	0	0	0	0	0	0	0	0	0	0	0	0	0	0	0	0	0	0	0	0	0	0	0	0	0	0
X2354	Arthropoda	Crustacea	Maxillopoda	Pseudocalanus	NA	0	0	0	0	0	0	0	0	0	0	0	0	0	0	0	0	0	0	0	0	0	0	0	0	0	0	0	0	0	0	0	0	0	0	0	0	0	0	0	0	0	0	0	0
X2374	Arthropoda	Crustacea	Maxillopoda	Pseudocalanus	NA	0	0	0	0	0	0	0	0	0	0	0	0	1	0	0	0	0	0	0	0	0	0	0	0	0	0	0	0	0	0	1	0	0	0	0	0	0	0	0	0	0	0	0	0
X243	Arthropoda	Crustacea	Maxillopoda	Pseudocalanus	Pseudocalanus_elongatus	0	0	0	0	0	0	0	1	0	1	1	4	1	0	0	0	0	0	0	22	1	0	1	8	0	1	0	0	6	0	1	1	22	0	0	0	0	0	0	0	0	2	0	0
X2437	Arthropoda	Crustacea	Maxillopoda	Pseudocalanus	Pseudocalanus_elongatus	0	0	0	0	0	0	0	0	0	0	0	0	0	0	0	0	0	0	0	0	0	0	0	0	0	0	0	0	1	0	0	0	0	0	0	0	0	0	0	0	0	0	0	0
X2442	Arthropoda	Crustacea	Maxillopoda	Pseudocalanus	Pseudocalanus_elongatus	0	0	0	0	0	0	0	0	0	0	0	0	0	0	0	0	0	0	0	1	0	0	0	0	0	0	0	1	0	0	0	0	0	0	0	0	0	0	0	0	0	0	0	0
X2498	Arthropoda	Crustacea	Maxillopoda	Pseudocalanus	NA	0	0	0	0	0	0	0	0	0	0	0	0	0	0	0	0	0	0	0	0	0	0	0	0	0	0	0	0	0	0	0	0	0	0	0	0	0	0	0	0	0	0	0	0
X2591	Arthropoda	Crustacea	Maxillopoda	Pseudocalanus	NA	0	0	0	0	0	0	0	0	0	0	0	0	0	0	0	0	0	0	0	0	0	0	0	0	0	0	0	0	0	0	0	0	0	0	0	0	0	0	0	0	0	0	0	0
X2610	Arthropoda	Crustacea	Maxillopoda	Pseudocalanus	NA	0	0	0	0	0	0	0	0	0	0	1	0	1	0	0	0	0	0	0	0	0	0	0	0	0	0	0	0	1	0	2	0	0	0	0	0	0	0	0	0	0	2	0	0
X2612	Arthropoda	Crustacea	Maxillopoda	Pseudocalanus	Pseudocalanus_moultoni	0	0	0	0	0	0	0	0	0	0	1	0	0	0	0	0	0	0	0	0	0	0	0	0	0	0	0	0	0	0	0	0	0	0	0	0	0	0	0	0	0	1	0	0
X2621	Arthropoda	Crustacea	Maxillopoda	Pseudocalanus	NA	0	0	0	0	0	0	0	0	0	0	0	0	0	0	0	0	0	0	0	0	0	0	0	0	0	0	0	0	0	0	0	0	1	0	0	0	0	0	0	0	0	0	0	0
X2624	Arthropoda	Crustacea	Maxillopoda	Pseudocalanus	NA	0	0	0	0	0	0	0	0	0	0	0	0	0	0	0	0	0	0	0	0	0	0	0	0	0	0	0	0	0	0	0	0	0	0	0	0	0	0	0	0	0	0	0	0
X2718	Arthropoda	Crustacea	Maxillopoda	Pseudocalanus	Pseudocalanus_moultoni	0	0	0	0	0	0	0	0	0	0	0	0	0	0	0	0	0	0	0	0	0	0	0	0	0	0	0	0	0	0	0	0	0	0	0	0	0	0	0	0	0	0	0	0
X2928	Arthropoda	Crustacea	Maxillopoda	Pseudocalanus	Pseudocalanus_moultoni	0	0	0	0	0	0	0	0	0	0	0	0	0	0	0	0	0	0	0	0	0	0	0	0	0	0	0	0	0	0	0	0	0	0	0	0	0	0	0	0	0	0	0	0
X2932	Arthropoda	Crustacea	Maxillopoda	Pseudocalanus	NA	0	0	0	0	0	0	0	0	0	0	0	0	0	0	0	0	0	0	0	0	0	0	0	0	0	0	0	0	0	0	0	0	0	0	0	0	0	0	0	0	0	0	0	0
X2967	Arthropoda	Crustacea	Maxillopoda	Pseudocalanus	NA	0	0	0	0	0	0	0	0	0	0	0	0	0	0	0	0	0	0	0	0	0	0	0	0	0	0	0	0	0	0	0	0	0	0	0	0	0	0	0	0	0	0	0	0
X2989	Arthropoda	Crustacea	Maxillopoda	Pseudocalanus	NA	0	0	0	0	0	0	0	0	0	0	0	0	0	0	0	0	0	0	0	0	0	0	0	0	0	0	0	0	0	0	0	0	0	0	0	0	0	0	0	0	0	0	0	0
X3012	Arthropoda	Crustacea	Maxillopoda	Pseudocalanus	NA	0	0	0	0	1	0	0	0	0	0	1	0	0	0	0	0	0	0	0	0	0	0	0	0	0	0	0	0	0	0	0	0	0	0	0	0	0	0	0	0	0	0	0	0
X3041	Arthropoda	Crustacea	Maxillopoda	Pseudocalanus	NA	0	0	0	0	0	0	0	0	0	0	0	0	0	0	0	0	0	0	0	0	0	0	0	0	0	0	0	0	0	0	0	0	0	0	0	0	0	0	0	0	0	0	0	0
X3064	Arthropoda	Crustacea	Maxillopoda	Pseudocalanus	NA	0	0	0	0	0	0	0	0	0	0	0	0	0	0	0	0	0	0	0	1	0	0	0	0	0	0	0	0	1	1	1	0	0	0	0	0	0	0	0	0	0	1	0	0
X309	Arthropoda	Crustacea	Maxillopoda	Pseudocalanus	Pseudocalanus_elongatus	0	0	0	0	0	0	0	0	0	0	0	0	0	0	0	0	0	0	0	25	0	0	1	1	1	0	0	1	1	0	1	0	12	0	0	0	0	0	0	0	0	3	0	0
X3198	Arthropoda	Crustacea	Maxillopoda	Pseudocalanus	NA	0	0	0	0	0	0	0	0	0	0	0	0	0	0	0	0	0	0	0	1	0	0	0	0	0	0	0	0	0	0	0	0	1	0	0	0	0	0	0	0	0	0	0	0
X323	Arthropoda	Crustacea	Maxillopoda	Pseudocalanus	Pseudocalanus_elongatus	0	0	0	0	4	0	0	0	0	0	0	1	1	0	0	0	0	0	0	7	0	0	0	1	0	0	0	0	5	0	2	0	7	0	0	0	0	0	0	0	0	3	2	0
X3245	Arthropoda	Crustacea	Maxillopoda	Pseudocalanus	NA	0	0	0	0	0	0	0	0	0	0	0	0	0	0	0	0	0	0	0	0	0	0	0	0	0	0	0	0	0	0	0	0	0	0	0	0	0	0	0	0	0	0	0	0
X3297	Arthropoda	Crustacea	Maxillopoda	Pseudocalanus	NA	0	0	0	0	0	0	0	0	0	0	0	0	0	0	0	0	0	0	0	0	0	0	0	0	0	0	0	0	0	0	0	0	0	0	0	0	0	0	0	0	0	0	0	0
X331	Arthropoda	Crustacea	Maxillopoda	Pseudocalanus	Pseudocalanus_elongatus	0	0	0	0	2	0	0	1	0	0	0	0	0	0	0	0	0	0	0	11	0	0	0	9	0	0	0	0	1	1	1	0	5	0	1	0	0	0	0	0	0	1	0	0
X3363	Arthropoda	Crustacea	Maxillopoda	Pseudocalanus	NA	0	0	0	0	0	0	0	0	0	0	0	0	0	0	0	0	0	0	0	0	0	0	0	0	0	0	0	0	0	0	0	0	0	0	0	0	0	0	0	0	0	0	0	0
X3398	Arthropoda	Crustacea	Maxillopoda	Pseudocalanus	NA	0	0	0	0	0	0	0	0	0	0	0	0	0	0	0	0	0	0	0	0	0	0	0	0	0	0	0	0	0	0	0	0	0	0	0	0	0	0	0	0	0	0	0	0
X3475	Arthropoda	Crustacea	Maxillopoda	Pseudocalanus	NA	0	0	0	0	0	0	0	0	0	0	0	0	0	0	0	0	0	0	0	0	0	0	0	0	0	0	0	0	0	0	0	0	0	0	0	0	0	0	0	0	0	0	0	0
X3531	Arthropoda	Crustacea	Maxillopoda	Pseudocalanus	Pseudocalanus_moultoni	0	0	0	0	0	0	0	0	0	0	0	0	0	0	0	0	0	0	0	0	0	0	0	0	0	0	0	0	0	0	0	0	0	0	0	0	0	0	0	0	0	0	0	0
X3534	Arthropoda	Crustacea	Maxillopoda	Pseudocalanus	Pseudocalanus_elongatus	0	0	0	0	0	0	0	0	0	0	0	0	0	0	0	0	0	0	0	0	0	0	0	0	0	0	0	0	0	0	0	0	0	0	0	0	0	0	0	0	0	0	0	0
X3674	Arthropoda	Crustacea	Maxillopoda	Pseudocalanus	NA	0	0	0	0	0	0	0	0	0	0	0	0	0	0	0	0	0	0	0	0	0	0	0	0	0	0	0	0	0	0	0	0	0	0	0	0	0	0	0	0	0	0	0	0
X3751	Arthropoda	Crustacea	Maxillopoda	Pseudocalanus	NA	0	0	0	0	0	0	0	0	0	0	0	0	0	0	0	0	0	0	0	0	0	0	0	0	0	0	0	0	0	0	0	0	0	0	0	0	0	0	0	0	0	0	0	0
X3819	Arthropoda	Crustacea	Maxillopoda	Pseudocalanus	NA	0	0	0	0	0	0	0	0	0	0	0	0	0	0	0	0	0	0	0	0	0	0	0	0	0	0	0	0	0	0	0	0	0	0	0	0	0	0	0	0	0	0	0	0
X3942	Arthropoda	Crustacea	Maxillopoda	Pseudocalanus	NA	0	0	0	0	0	0	0	0	0	0	0	0	0	0	0	0	0	0	0	0	0	0	0	0	0	0	0	0	0	0	0	0	0	0	0	0	0	0	0	0	0	0	0	0
X4061	Arthropoda	Crustacea	Maxillopoda	Pseudocalanus	NA	0	0	0	0	0	0	0	0	0	0	0	0	0	0	0	0	0	0	0	0	0	0	0	0	0	0	0	0	0	0	0	0	0	0	0	0	0	0	0	0	0	0	0	0
X4289	Arthropoda	Crustacea	Maxillopoda	Pseudocalanus	NA	0	0	0	0	0	0	0	0	0	0	0	0	0	0	0	0	0	0	0	0	0	0	0	0	0	0	0	0	0	0	0	0	0	0	0	0	0	0	0	0	0	0	0	0
X4410	Arthropoda	Crustacea	Maxillopoda	Pseudocalanus	NA	0	0	0	0	0	0	0	0	0	0	0	0	0	0	0	0	0	0	0	0	0	0	0	0	0	0	0	0	0	0	0	0	0	0	0	0	0	0	0	0	0	0	0	0
X4451	Arthropoda	Crustacea	Maxillopoda	Pseudocalanus	Pseudocalanus_elongatus	0	0	0	0	0	0	0	0	0	0	0	0	0	0	0	0	0	0	0	0	0	0	0	0	0	0	0	0	0	0	0	0	0	0	0	0	0	0	0	0	0	0	0	0
X486	Arthropoda	Crustacea	Maxillopoda	Pseudocalanus	Pseudocalanus_elongatus	0	0	0	0	0	0	0	0	0	0	0	0	0	0	0	0	0	0	0	3	0	0	0	0	0	0	0	1	1	0	0	0	6	0	0	0	0	0	0	0	0	2	0	0
X767	Arthropoda	Crustacea	Maxillopoda	Pseudocalanus	NA	1	0	0	0	1	0	0	1	0	0	0	0	0	0	0	0	0	0	0	0	0	0	0	0	0	0	0	0	1	0	0	0	0	0	0	0	0	0	0	0	0	0	0	0
X841	Arthropoda	Crustacea	Maxillopoda	Pseudocalanus	NA	0	0	0	0	0	0	0	0	0	0	0	0	0	0	0	0	0	0	0	0	0	0	0	0	0	0	0	0	0	0	0	0	0	0	0	0	0	0	0	0	0	0	0	0
X847	Arthropoda	Crustacea	Maxillopoda	Pseudocalanus	Pseudocalanus_elongatus	0	0	0	0	0	0	0	0	0	0	0	0	0	0	0	0	0	0	0	0	0	0	0	0	0	0	0	0	0	0	0	0	0	0	0	0	0	0	0	0	0	0	0	0
X86	Arthropoda	Crustacea	Maxillopoda	Pseudocalanus	Pseudocalanus_elongatus	0	0	0	0	0	0	0	0	0	2	0	0	1	0	0	0	0	0	0	24	0	0	0	0	0	0	0	1	0	1	0	1	5	0	0	0	0	0	0	0	0	3	0	0
X868	Arthropoda	Crustacea	Maxillopoda	Pseudocalanus	NA	0	0	1	0	0	0	0	0	0	0	0	0	1	0	0	0	0	0	0	0	0	0	0	0	0	0	0	0	0	0	0	0	2	0	0	0	0	0	0	0	0	2	0	0
X939	Arthropoda	Crustacea	Maxillopoda	Pseudocalanus	Pseudocalanus_elongatus	0	0	0	0	0	0	0	0	0	0	0	0	0	0	0	0	0	0	0	0	0	0	0	0	0	0	0	0	0	0	0	0	0	0	0	0	0	0	0	0	0	0	0	0
X948	Arthropoda	Crustacea	Maxillopoda	Pseudocalanus	Pseudocalanus_elongatus	0	0	0	0	0	0	0	0	0	0	0	0	0	0	0	0	0	0	0	0	0	0	0	0	0	0	0	0	0	0	0	0	0	0	0	0	0	0	0	0	0	0	0	0
X991	Arthropoda	Crustacea	Maxillopoda	Pseudocalanus	Pseudocalanus_elongatus	0	0	0	0	0	0	0	0	0	0	0	0	0	0	0	0	0	1	0	1	0	0	0	0	0	0	0	1	0	0	0	0	2	0	0	0	0	0	0	0	0	0	0	0
X1789	Arthropoda	Crustacea	Maxillopoda	Sacculina	Sacculina_carcini	0	0	0	0	0	0	0	0	0	0	0	0	0	0	0	0	0	0	0	0	0	0	0	0	0	0	0	0	0	0	0	0	0	0	0	0	0	0	0	0	0	0	0	0
X3917	Arthropoda	Crustacea	Malacostraca	Schistomysis	Schistomysis_kervillei	0	0	0	0	0	0	0	0	0	0	0	0	0	0	0	0	0	0	0	0	0	0	0	0	0	0	0	0	0	0	0	0	0	0	0	0	0	0	0	0	0	0	0	0
X53	Arthropoda	Crustacea	Maxillopoda	Semibalanus	Semibalanus_balanoides	0	0	1	0	0	0	0	0	0	0	0	0	2	0	6	0	0	0	0	0	0	0	1	0	0	0	0	0	3	4	6	0	0	0	0	0	1	0	2	4	0	1	0	1
X3210	Arthropoda	Crustacea	Maxillopoda	Tachidius	Tachidius_triangularis	1	0	0	1	0	0	0	4	1	0	0	0	0	0	0	0	0	2	0	0	4	0	0	0	0	0	0	0	3	0	1	0	0	0	0	0	0	0	0	0	0	0	0	0
X1183	Arthropoda	Crustacea	Maxillopoda	Temora	Temora_longicornis	0	0	0	0	0	0	0	0	0	0	0	0	0	0	0	0	0	0	0	0	0	0	0	0	0	1	0	0	0	0	0	1	0	0	0	0	0	0	0	0	0	0	0	0
X1683	Arthropoda	Crustacea	Maxillopoda	Temora	Temora_longicornis	0	0	0	0	0	0	0	0	0	0	0	0	0	0	0	0	0	0	0	0	0	0	0	0	0	0	0	0	0	0	0	0	0	0	0	0	0	0	0	0	0	0	0	0
X1768	Arthropoda	Crustacea	Maxillopoda	Temora	Temora_longicornis	0	0	0	0	0	0	0	0	0	0	0	0	0	0	0	0	0	0	0	0	0	0	0	0	0	0	0	0	0	0	0	0	0	0	0	0	0	0	0	0	0	0	0	0
X1960	Arthropoda	Crustacea	Maxillopoda	Temora	Temora_longicornis	0	0	0	0	0	0	0	0	0	0	0	0	0	0	0	0	0	0	0	0	0	0	0	0	0	0	0	0	0	0	0	0	0	0	0	0	0	0	0	0	0	0	0	0
X2137	Arthropoda	Crustacea	Maxillopoda	Temora	Temora_longicornis	0	0	0	0	0	0	0	0	0	0	0	0	0	0	0	0	0	0	0	0	0	0	0	0	0	0	0	0	0	0	0	0	0	0	0	0	0	0	0	0	0	0	0	0
X2204	Arthropoda	Crustacea	Maxillopoda	Temora	Temora_longicornis	0	0	0	0	0	0	0	0	0	0	0	0	0	0	0	0	0	0	0	0	0	0	0	0	0	0	0	0	0	0	0	0	0	0	0	0	0	0	0	0	0	0	0	0
X2223	Arthropoda	Crustacea	Maxillopoda	Temora	Temora_longicornis	0	0	0	0	0	0	0	0	0	0	0	0	1	0	0	0	0	0	0	0	0	0	0	0	0	0	0	0	0	0	0	0	0	0	0	0	0	0	0	0	0	0	0	0
X2254	Arthropoda	Crustacea	Maxillopoda	Temora	Temora_longicornis	0	0	0	0	0	0	0	0	0	0	0	0	0	0	0	0	0	0	0	0	0	0	0	0	0	0	0	0	0	0	0	0	0	0	0	0	0	0	0	0	0	0	0	0
X228	Arthropoda	Crustacea	Maxillopoda	Temora	Temora_longicornis	0	0	0	0	0	0	0	0	0	0	0	0	0	0	0	0	0	0	0	5	0	1	0	0	1	1	0	0	0	0	0	1	0	1	0	0	0	0	0	0	0	1	0	0
X2449	Arthropoda	Crustacea	Maxillopoda	Temora	Temora_longicornis	0	0	0	0	0	0	1	0	0	0	0	0	0	0	0	0	0	0	0	0	1	0	0	0	0	0	0	0	0	0	0	0	0	0	0	0	0	0	0	0	0	0	0	0
X2886	Arthropoda	Crustacea	Maxillopoda	Temora	Temora_longicornis	0	0	0	0	0	0	0	0	0	0	0	0	0	0	0	0	0	0	0	0	0	0	0	0	0	0	0	0	1	0	0	0	0	0	0	0	0	0	0	0	0	0	0	0
X2974	Arthropoda	Crustacea	Maxillopoda	Temora	Temora_longicornis	0	0	0	0	1	0	0	0	0	1	0	0	0	0	0	0	0	0	0	0	1	0	0	0	0	0	0	0	0	1	0	0	0	0	0	0	0	0	0	0	0	1	0	0
X2978	Arthropoda	Crustacea	Maxillopoda	Temora	Temora_longicornis	0	0	0	0	0	1	0	0	0	0	0	0	0	0	0	0	0	0	0	0	0	0	0	0	0	1	0	0	0	0	0	0	0	0	0	0	0	0	0	0	0	0	0	0
X298	Arthropoda	Crustacea	Maxillopoda	Temora	Temora_longicornis	0	0	0	0	0	0	0	0	1	0	0	0	0	0	0	0	0	0	0	0	0	0	0	0	0	1	0	0	0	0	0	0	0	0	0	0	0	0	0	0	0	0	0	0
X3	Arthropoda	Crustacea	Maxillopoda	Temora	Temora_longicornis	96	6	52	11	303	142	135	16	21	135	33	0	62	13	63	4	3	0	7	1044	252	24	136	65	75	221	3	23	209	67	186	435	4	67	2	41	7	5	33	28	59	78	4	14
X3039	Arthropoda	Crustacea	Maxillopoda	Temora	Temora_longicornis	0	0	0	0	0	0	0	0	0	0	0	0	0	0	0	0	0	0	0	0	0	0	0	0	0	0	0	0	0	0	0	0	0	0	0	0	0	0	0	0	0	0	0	0
X3088	Arthropoda	Crustacea	Maxillopoda	Temora	NA	0	0	0	0	1	1	0	0	0	1	0	0	0	0	0	0	0	0	1	0	0	0	0	0	0	0	0	0	0	0	0	0	0	0	0	0	0	0	0	0	0	0	0	0
X3091	Arthropoda	Crustacea	Maxillopoda	Temora	Temora_longicornis	0	0	0	0	1	2	0	0	0	0	0	0	0	0	0	0	0	0	0	0	1	0	0	0	0	0	0	0	0	0	0	0	0	0	0	0	0	0	0	0	0	0	0	0
X3393	Arthropoda	Crustacea	Maxillopoda	Temora	NA	0	0	0	0	0	0	0	0	0	0	0	0	0	0	0	0	0	0	0	0	0	0	0	0	0	0	0	0	0	0	1	0	0	0	0	0	0	0	0	0	0	0	0	0
X3596	Arthropoda	Crustacea	Maxillopoda	Temora	Temora_longicornis	0	0	0	0	0	0	0	0	0	0	0	0	0	0	0	0	0	0	0	0	0	0	0	0	0	0	0	0	0	0	0	0	0	0	0	0	0	0	0	0	0	0	0	0
X3725	Arthropoda	Crustacea	Maxillopoda	Temora	NA	0	0	0	0	0	0	0	0	0	0	0	0	0	0	0	0	0	0	0	0	0	0	0	0	0	0	0	0	0	0	0	0	0	0	0	0	0	0	0	0	0	0	0	0
X4003	Arthropoda	Crustacea	Maxillopoda	Temora	Temora_longicornis	0	0	0	0	0	0	0	0	0	0	0	0	0	0	0	0	0	0	0	0	0	0	0	0	0	0	0	0	0	0	0	0	0	0	0	0	0	0	0	0	0	0	0	0
X482	Arthropoda	Crustacea	Maxillopoda	Temora	Temora_longicornis	0	0	0	0	0	1	0	0	0	0	0	0	0	0	0	0	0	0	0	0	0	0	0	0	0	0	0	0	0	0	0	0	0	0	0	0	0	0	0	0	0	0	0	0
X646	Arthropoda	Crustacea	Maxillopoda	Temora	Temora_longicornis	0	0	0	0	1	0	1	0	0	0	0	0	1	0	0	0	0	0	0	1	2	0	0	0	0	0	0	0	1	0	0	0	0	0	0	0	0	0	0	0	0	0	0	0
X782	Arthropoda	Crustacea	Maxillopoda	Temora	Temora_longicornis	0	0	0	0	0	1	1	0	0	1	0	0	1	0	0	0	1	0	1	0	2	0	0	0	1	3	0	0	0	0	0	1	0	2	0	0	0	0	0	0	0	0	0	0
X854	Arthropoda	Crustacea	Maxillopoda	Temora	Temora_longicornis	0	0	0	0	0	0	0	0	0	0	0	0	0	0	0	0	0	0	0	0	0	0	0	0	0	0	0	0	0	0	0	0	0	1	0	0	0	0	0	0	0	0	0	0
X857	Arthropoda	Crustacea	Maxillopoda	Temora	Temora_longicornis	0	0	0	0	1	0	0	0	0	0	0	0	0	0	0	0	0	0	0	0	1	0	0	0	0	0	0	0	0	0	0	0	0	0	0	0	0	0	0	0	0	0	0	0
X963	Arthropoda	Crustacea	Maxillopoda	Temora	Temora_longicornis	0	0	0	0	0	0	0	0	0	0	0	0	0	0	0	0	0	0	0	0	0	0	0	0	0	0	0	0	0	0	0	0	0	0	0	0	0	0	0	0	0	0	0	0
X1432	Arthropoda	Crustacea	Maxillopoda	Verruca	NA	0	0	0	0	0	0	0	0	0	0	0	0	0	0	0	0	0	0	0	0	0	0	0	0	0	1	0	0	0	0	0	0	0	0	0	0	0	0	0	0	0	0	0	0
X91	Arthropoda	Crustacea	Maxillopoda	Verruca	NA	1	1	1	0	0	1	3	5	0	0	1	0	3	4	5	1	0	4	5	0	0	0	4	0	0	1	0	0	2	6	1	0	1	0	1	0	0	0	2	0	0	2	0	0
X121	Arthropoda	Crustacea	Maxillopoda	Wanella	Wanella_sp.	0	0	0	1	0	0	0	1	0	0	0	0	0	1	0	0	1	6	0	0	1	0	0	0	1	0	0	0	5	1	11	0	0	0	0	0	0	0	0	0	0	0	0	0
X2940	Arthropoda	Crustacea	Maxillopoda	Zaus	Zaus_caeruleus	0	0	1	0	2	0	1	0	0	0	0	0	1	0	1	0	0	0	0	0	0	0	0	0	0	0	0	0	4	0	0	0	0	0	0	0	0	0	0	0	0	0	0	0
X1805	Ascomycota	Pezizomycotina	Sordariomycetes	Acremonium	Acremonium_sclerotigenum	0	0	1	0	0	0	0	0	0	0	0	0	1	4	0	0	0	0	0	0	0	0	0	0	0	0	0	3	0	0	0	0	0	0	0	0	0	0	0	0	0	0	0	0
X3185	Ascomycota	Pezizomycotina	Sordariomycetes	Apiospora	Apiospora_montagnei	0	3	3	0	0	0	0	1	0	0	0	0	0	0	0	2	0	0	0	0	1	0	2	0	0	0	1	0	0	0	0	0	0	5	1	0	0	0	0	0	0	0	0	0
X160	Ascomycota	Pezizomycotina	Leotiomycetes	Articulospora	Articulospora_tetracladia	17	14	2	7	1	6	22	7	0	0	56	0	13	21	1	13	1	5	2	2	24	10	10	46	9	31	2	48	46	28	28	46	0	61	1	28	1	7	9	40	6	199	2	9
X798	Ascomycota	Pezizomycotina	Eurotiomycetes	Aspergillus	NA	1	3	1	3	4	0	6	3	1	10	0	1	1	2	1	5	1	1	0	1	1	3	2	4	2	5	0	6	8	2	5	0	0	1	2	0	1	0	3	1	0	8	2	0
X1527	Ascomycota	Pezizomycotina	Dothideomycetes	Bipolaris	Bipolaris_sp.	0	0	1	0	0	0	0	0	0	20	0	0	0	0	0	0	0	0	0	0	1	0	4	1	0	0	0	0	0	0	1	0	0	0	0	0	0	0	0	0	0	0	0	0
X2422	Ascomycota	Pezizomycotina	Dothideomycetes	Bipolaris	Bipolaris_sp.	2	1	0	1	0	0	8	0	0	0	0	0	0	0	0	0	0	0	0	0	0	0	5	2	0	0	0	0	12	0	0	0	0	0	0	0	0	0	0	0	0	2	0	0
X1963	Ascomycota	Pezizomycotina	Leotiomycetes	Brachyalara	Brachyalara_straminea	0	0	0	0	0	0	0	0	0	0	0	0	1	0	0	0	0	0	0	0	0	0	0	0	0	0	0	2	0	0	0	0	0	0	0	0	0	0	0	0	0	2	0	0
X2714	Ascomycota	Pezizomycotina	Leotiomycetes	Brachyalara	Brachyalara_straminea	0	0	0	0	0	0	0	0	0	0	0	0	0	1	0	0	0	0	0	0	0	0	0	0	0	0	0	0	0	3	0	0	0	2	0	0	0	0	0	2	0	3	0	0
X3825	Ascomycota	Pezizomycotina	Sordariomycetes	Cephalotheca	Cephalotheca_sulfurea	0	0	0	0	1	0	0	1	0	0	0	0	0	0	0	0	0	0	0	0	0	0	0	0	0	0	0	0	0	0	0	0	0	0	0	0	0	0	0	0	0	0	0	0
X1801	Ascomycota	Pezizomycotina	Eurotiomycetes	Cyphellophora	Cyphellophora_laciniata	0	1	0	0	0	0	2	0	1	0	0	0	0	4	0	0	0	1	0	0	12	1	1	2	0	1	0	0	4	0	5	8	0	0	0	2	1	0	5	2	0	4	1	0
X3957	Ascomycota	Pezizomycotina	Dothideomycetes	Decaisnella	Decaisnella_formosa	0	0	0	0	0	0	0	0	2	0	2	0	0	1	0	0	0	0	0	0	0	0	0	0	0	1	0	0	0	0	0	0	0	0	0	0	0	0	0	0	0	0	0	0
X1972	Ascomycota	Pezizomycotina	Sordariomycetes	Emericellopsis	Emericellopsis_alkalina	1	0	2	0	3	1	0	0	1	0	0	0	0	3	0	0	0	0	1	0	1	0	0	0	0	1	1	5	0	0	0	0	0	0	2	1	0	0	0	3	0	0	1	1
X1528	Ascomycota	Pezizomycotina	Eurotiomycetes	Exophiala	Exophiala_sp.	0	0	0	0	0	0	0	0	0	0	0	0	0	0	0	0	1	0	0	0	0	0	0	0	0	0	0	0	0	0	1	0	0	0	1	0	2	0	0	1	2	0	0	0
X2371	Ascomycota	Pezizomycotina	Eurotiomycetes	Exophiala	Exophiala_pisciphila	0	0	0	0	0	0	0	0	0	0	0	0	0	0	0	0	0	0	1	0	0	0	0	0	0	1	0	0	0	0	0	0	0	0	0	0	0	0	0	0	0	0	0	0
X3811	Ascomycota	Saccharomycotina	Saccharomycetales	Geotrichum	Geotrichum_sp.	0	0	0	0	0	0	0	0	0	0	0	0	0	0	0	0	0	0	0	0	0	0	0	0	0	0	0	0	0	0	0	0	0	0	0	0	0	0	0	0	0	1	0	0
X1704	Ascomycota	Pezizomycotina	Sordariomycetes	Gibberella	Gibberella_zeae	0	0	0	0	3	0	1	0	0	1	0	0	1	1	0	0	0	0	0	0	0	4	0	0	0	0	0	0	2	0	0	0	0	0	0	0	0	0	0	0	0	2	0	0
X3987	Ascomycota	Pezizomycotina	Sordariomycetes	Kionochaeta	Kionochaeta_sp.	0	0	0	0	0	0	0	1	0	0	0	0	0	0	0	0	0	0	0	0	1	0	0	0	1	0	1	0	0	0	0	4	0	0	0	0	0	0	0	0	0	0	0	0
X1080	Ascomycota	Pezizomycotina	Eurotiomycetes	Knufia	Knufia_cryptophialidica	5	4	0	2	0	0	41	0	0	0	0	0	1	0	0	1	0	0	0	0	2	2	1	2	0	2	0	0	6	0	0	0	0	0	0	0	1	0	0	0	0	0	0	0
X3296	Ascomycota	Pezizomycotina	Lecanoromycetes	Lecania	Lecania_cyrtella	0	0	0	0	0	0	0	0	0	0	0	0	0	0	0	0	0	0	0	0	0	0	0	0	0	0	0	0	0	0	0	0	0	0	0	0	0	0	0	0	0	0	0	0
X1519	Ascomycota	Pezizomycotina	Sordariomycetes	Lecanicillium	Lecanicillium_saksenae	6	1	0	3	0	2	3	0	2	2	1	0	2	0	0	0	0	0	0	0	0	0	1	0	1	3	0	1	0	2	0	2	0	1	3	0	0	0	0	1	0	3	0	0
X2260	Ascomycota	Pezizomycotina	Sordariomycetes	Liberomyces	Liberomyces_saliciphilus	7	0	0	1	2	0	0	1	0	0	0	0	0	2	0	0	0	0	0	0	0	1	1	0	0	0	0	1	0	0	0	0	0	0	0	0	0	0	0	6	0	0	0	0
X1142	Ascomycota	Saccharomycotina	Saccharomycetales	Metschnikowia	Metschnikowia_sp.	1	2	1	2	0	1	5	0	0	3	0	0	0	3	2	1	0	0	0	0	0	1	0	2	0	2	0	0	0	1	0	0	0	0	0	0	0	0	0	0	0	0	0	0
X3509	Ascomycota	Saccharomycotina	Saccharomycetales	Metschnikowia	Metschnikowia_zobellii	0	0	0	0	0	0	2	0	0	0	1	0	0	0	0	0	0	0	0	0	0	0	0	0	0	0	0	0	0	0	0	0	0	0	0	0	0	0	0	0	0	0	0	0
X3749	Ascomycota	Saccharomycotina	Saccharomycetales	Metschnikowia	Metschnikowia_sp.	0	0	0	0	0	0	0	0	0	0	0	0	0	0	0	0	0	0	0	0	0	0	0	0	0	0	0	0	0	0	0	0	0	0	0	0	0	0	0	0	0	0	0	0
X2266	Ascomycota	Pezizomycotina	Dothideomycetes	Mycosphaerella	NA	0	0	0	0	0	0	0	0	0	0	0	0	0	0	0	0	0	0	0	0	1	0	0	0	0	0	0	0	2	0	0	0	0	0	0	0	0	0	0	0	0	2	0	0
X2465	Ascomycota	Pezizomycotina	Dothideomycetes	Mycosphaerella	NA	1	0	0	0	0	0	3	0	0	0	0	0	1	0	0	0	0	0	0	0	0	1	0	0	0	0	0	0	0	0	0	0	0	0	0	0	0	0	1	0	0	1	0	0
X2661	Ascomycota	Pezizomycotina	Dothideomycetes	Mycosphaerella	NA	3	1	0	0	0	0	2	0	0	1	1	0	0	0	0	1	0	0	0	0	0	0	0	0	0	0	0	0	2	0	1	0	0	0	0	3	0	0	1	0	0	0	0	0
X2709	Ascomycota	Pezizomycotina	Dothideomycetes	Mycosphaerella	Mycosphaerella_graminicola	0	0	0	0	0	0	0	1	0	0	0	0	0	0	0	0	0	0	0	0	0	0	0	0	0	2	0	0	0	0	0	0	0	0	0	0	0	0	0	9	0	1	0	1
X2054	Ascomycota	NA	NA	NA	NA	0	0	0	0	3	0	0	0	0	0	0	0	0	1	0	0	0	0	0	0	0	0	2	0	0	0	0	0	1	3	0	0	0	11	0	1	0	0	0	0	0	0	0	0
X3357	Ascomycota	NA	NA	NA	NA	0	0	0	0	0	0	0	0	0	0	0	0	0	0	0	0	0	0	0	0	0	0	0	0	0	0	0	0	0	0	0	0	0	0	0	0	0	0	0	0	0	0	0	0
X1454	Ascomycota	Pezizomycotina	Eurotiomycetes	NA	NA	2	3	0	0	0	0	8	0	0	0	1	0	0	0	0	0	0	0	0	0	0	0	1	1	0	0	0	0	1	0	0	0	0	0	0	0	1	0	0	0	0	0	0	0
X1691	Ascomycota	Pezizomycotina	Dothideomycetes	NA	NA	0	1	0	0	0	0	2	0	0	0	0	0	0	0	0	0	0	0	0	0	0	0	4	2	0	0	0	0	1	0	0	0	0	0	0	0	0	0	0	0	0	0	0	0
X2019	Ascomycota	Pezizomycotina	Eurotiomycetes	NA	NA	5	0	0	0	0	0	0	0	0	0	0	0	0	0	0	0	0	0	0	0	0	0	1	1	0	0	0	0	0	0	0	0	0	0	0	0	0	0	0	0	0	0	0	0
X2156	Ascomycota	Pezizomycotina	Eurotiomycetes	NA	NA	0	0	0	0	0	0	1	0	0	0	0	0	0	0	0	0	0	0	0	0	0	0	0	0	0	0	0	0	0	0	0	0	0	0	0	0	0	0	0	0	0	0	0	0
X2216	Ascomycota	Pezizomycotina	Dothideomycetes	NA	NA	6	6	0	3	0	0	1	0	0	0	0	0	2	0	0	0	0	0	0	0	0	0	0	1	0	0	0	0	3	0	0	0	0	0	0	0	0	0	0	0	0	0	0	0
X2299	Ascomycota	Pezizomycotina	Eurotiomycetes	NA	NA	0	0	0	0	0	0	0	0	0	0	0	0	0	0	0	0	0	0	0	0	0	0	1	0	0	0	0	0	0	0	0	0	0	0	0	0	0	0	0	0	0	0	0	0
X245	Ascomycota	Pezizomycotina	Dothideomycetes	NA	NA	14	4	7	9	1	0	18	2	1	1	4	0	2	1	4	4	1	0	0	0	1	4	3	1	0	1	1	2	5	3	7	0	0	1	2	1	0	0	1	26	0	10	4	0
X2923	Ascomycota	Pezizomycotina	NA	NA	NA	0	0	0	0	0	0	0	0	0	0	0	0	0	0	0	0	0	0	0	0	0	0	1	0	0	0	0	0	0	0	0	0	0	0	0	0	0	0	0	0	0	1	0	0
X3015	Ascomycota	Pezizomycotina	Eurotiomycetes	NA	NA	0	0	0	0	0	0	0	0	0	0	0	0	0	0	0	0	0	1	0	0	1	0	0	4	0	0	0	0	0	0	0	0	0	0	0	0	0	0	0	0	0	0	0	0
X3313	Ascomycota	Pezizomycotina	Lecanoromycetes	NA	NA	3	0	0	0	0	0	0	0	0	0	0	0	0	0	0	0	0	0	0	0	0	0	0	0	0	0	0	0	0	0	0	0	0	0	0	0	0	0	0	0	0	0	0	0
X3616	Ascomycota	Pezizomycotina	Lecanoromycetes	NA	NA	0	0	0	0	0	0	0	0	0	0	0	0	0	0	0	0	0	0	0	0	0	0	0	0	0	0	0	0	0	0	0	0	0	0	0	0	0	0	0	0	0	0	0	0
X3764	Ascomycota	Pezizomycotina	Lecanoromycetes	NA	NA	1	0	0	0	0	0	0	0	1	0	0	0	0	0	0	0	0	0	0	0	0	0	0	0	0	0	0	0	0	0	0	0	0	0	0	0	0	0	0	0	0	0	0	0
X3801	Ascomycota	Pezizomycotina	Sordariomycetes	NA	NA	0	0	0	0	0	0	0	0	0	0	0	0	0	0	0	0	0	0	0	0	0	1	0	0	2	0	0	0	0	0	0	0	0	2	0	0	0	0	0	0	0	0	0	0
X3867	Ascomycota	Pezizomycotina	NA	NA	NA	0	0	0	0	0	0	0	0	0	0	0	0	0	0	0	0	0	0	0	0	0	0	0	0	0	0	0	0	0	0	0	0	0	0	0	0	0	0	0	0	0	0	0	0
X3985	Ascomycota	Pezizomycotina	NA	NA	NA	0	0	0	5	0	0	0	0	0	0	0	0	0	0	1	0	0	0	0	0	0	0	0	0	0	0	0	0	0	0	0	0	0	0	0	0	0	0	0	0	0	1	0	0
X4051	Ascomycota	Pezizomycotina	NA	NA	NA	0	0	0	0	0	0	0	1	0	0	0	0	0	0	0	0	0	0	0	0	0	0	0	0	0	0	0	0	0	0	0	0	0	0	0	0	0	0	0	0	0	0	0	0
X4099	Ascomycota	Pezizomycotina	NA	NA	NA	0	0	0	0	0	0	0	0	0	0	0	0	0	0	0	0	0	0	0	0	0	0	0	0	0	0	0	0	0	0	0	0	0	0	0	0	0	0	0	0	0	0	0	0
X4338	Ascomycota	Pezizomycotina	NA	NA	NA	0	0	0	0	0	0	0	0	0	0	0	0	0	0	0	0	0	0	0	0	0	0	0	0	0	0	1	0	0	0	0	0	0	0	0	0	0	0	0	0	0	0	0	0
X4395	Ascomycota	Pezizomycotina	Sordariomycetes	NA	NA	0	0	0	0	0	0	0	0	0	0	0	0	0	0	0	0	0	0	0	0	0	0	0	0	0	0	0	0	0	0	0	0	0	0	0	0	0	0	0	0	0	0	0	0
X984	Ascomycota	Pezizomycotina	Sordariomycetes	NA	NA	0	0	0	0	0	0	0	1	1	0	2	0	0	0	0	0	0	0	0	0	0	0	0	0	0	0	0	0	0	1	1	0	0	0	0	0	0	0	0	0	0	0	0	0
X2125	Ascomycota	Saccharomycotina	Saccharomycetales	NA	NA	2	1	0	0	0	0	1	0	0	3	0	0	0	0	1	0	1	0	0	0	0	0	4	0	2	0	0	1	1	0	3	2	0	1	2	0	0	0	0	0	4	0	0	0
X1127	Ascomycota	Pezizomycotina	Dothideomycetes	Ochroconis	Ochroconis_longiphorum	0	1	1	1	0	0	0	0	0	0	10	1	1	4	0	0	0	0	0	1	0	0	0	0	0	0	1	0	0	1	0	0	0	0	0	0	0	1	0	1	0	2	0	0
X2629	Ascomycota	Pezizomycotina	Dothideomycetes	Paraconiothyrium	Paraconiothyrium_africanum	1	1	0	2	0	0	0	1	0	3	0	0	0	1	0	0	0	0	0	1	0	2	0	0	0	1	0	0	4	0	0	0	0	2	0	0	0	0	0	0	0	0	0	0
X547	Ascomycota	Pezizomycotina	Eurotiomycetes	Phaeosaccardinula	Phaeosaccardinula_sp.	0	0	0	0	0	0	0	0	0	0	0	0	0	0	0	2	0	0	0	0	0	0	0	0	0	0	0	0	0	0	0	0	0	0	0	0	0	0	0	0	0	0	0	0
X1038	Ascomycota	Pezizomycotina	Dothideomycetes	Phaeosphaeria	Phaeosphaeria_anchiala	3	2	0	2	0	0	6	0	0	0	0	0	0	2	0	0	0	0	0	0	1	0	1	0	0	0	0	0	2	0	0	0	0	0	0	0	0	0	0	0	0	1	0	0
X1189	Ascomycota	Pezizomycotina	Dothideomycetes	Phaeosphaeria	Phaeosphaeria_avenaria	11	2	3	0	2	0	3	0	1	0	0	3	2	0	0	0	0	0	0	0	1	1	0	0	0	1	0	0	0	1	2	2	1	0	0	0	1	0	1	0	0	0	0	0
X4222	Ascomycota	Saccharomycotina	Saccharomycetales	Pichia	Pichia_nakasei	0	0	0	0	0	0	0	0	0	0	0	0	0	0	0	0	0	0	0	0	0	0	0	0	0	0	0	0	0	0	0	0	0	0	0	0	0	0	0	0	0	0	0	0
X382	Ascomycota	Taphrinomycotina	Taphrinomycetes	Protomyces	Protomyces_inouyei	1	5	58	2	1	1	3	5	1	0	23	0	4	1	0	6	0	4	2	0	0	3	1	7	1	7	5	7	3	8	2	0	0	12	0	8	0	3	5	11	0	9	10	4
X1940	Ascomycota	Pezizomycotina	Eurotiomycetes	Rhinocladiella	NA	2	0	0	0	0	0	0	0	0	0	0	0	0	0	0	0	0	0	0	0	0	0	0	0	0	0	0	0	0	0	0	0	0	0	0	0	0	0	0	0	0	0	0	0
X3840	Ascomycota	Pezizomycotina	Lecanoromycetes	Rhizoplaca	Rhizoplaca_peltata	0	0	0	0	0	0	0	0	0	0	0	0	0	0	0	0	0	0	0	0	0	0	0	0	0	1	0	0	0	0	0	0	0	0	0	0	0	0	0	0	0	0	0	0
X2239	Ascomycota	Pezizomycotina	Leotiomycetes	Sclerotinia	Sclerotinia_trifoliorum	3	1	0	0	5	0	1	0	0	0	0	1	1	0	0	0	0	0	2	0	0	0	1	0	0	0	1	2	1	0	1	1	0	0	0	0	0	0	0	0	0	1	0	0
X2664	Ascomycota	Pezizomycotina	Dothideomycetes	Slimacomyces	Slimacomyces_isiola	1	4	0	2	4	0	4	0	0	3	0	0	1	0	1	3	0	0	0	0	0	0	0	0	0	0	0	0	0	0	0	0	0	0	0	0	0	0	0	0	0	0	0	0
X3444	Ascomycota	Pezizomycotina	Leotiomycetes	Tetracladium	Tetracladium_marchalianum	0	0	0	0	0	0	0	0	0	0	0	0	0	0	0	0	0	0	0	0	0	0	0	0	0	0	0	0	0	0	0	0	0	0	0	0	0	0	0	0	0	0	0	0
X2770	Ascomycota	Pezizomycotina	Dothideomycetes	Trematosphaeria	Trematosphaeria_sp.	0	0	0	2	0	0	0	0	1	0	0	0	4	0	0	0	0	0	0	0	0	0	0	0	0	0	0	0	0	0	0	0	1	0	0	0	0	0	0	0	0	1	0	0
X3560	Ascomycota	Saccharomycotina	Saccharomycetales	Wickerhamomyces	Wickerhamomyces_anomalus	0	0	0	0	0	0	3	0	0	0	0	0	0	0	0	0	0	0	0	0	0	0	0	0	0	0	0	0	3	0	0	0	0	0	0	0	0	0	0	3	0	0	0	0
X1164	Bacillariophyta	Bacillariophyta_X	Raphid-pennate	Achnanthes	Achnanthes_sp.	0	0	0	1	0	0	0	0	0	0	0	0	0	0	0	0	0	0	2	0	0	0	0	0	0	0	0	3	0	0	1	0	0	3	0	0	0	0	0	0	0	0	0	0
X1945	Bacillariophyta	Bacillariophyta_X	Raphid-pennate	Achnanthes	Achnanthes_sp.	0	1	0	0	0	0	0	0	0	0	0	0	0	0	0	0	0	0	0	0	2	0	0	0	0	0	0	0	0	0	0	0	0	0	0	0	0	0	0	0	0	1	0	0
X2130	Bacillariophyta	Bacillariophyta_X	Raphid-pennate	Achnanthes	Achnanthes_sp.	0	0	0	0	0	0	0	0	0	0	0	0	0	0	1	0	0	0	0	0	0	0	0	0	0	0	0	0	0	0	0	0	2	0	0	0	0	0	0	0	0	0	0	0
X255	Bacillariophyta	Bacillariophyta_X	Raphid-pennate	Achnanthes	Achnanthes_sp.	0	0	0	0	0	0	3	0	0	0	0	0	0	0	0	0	0	0	0	0	14	0	0	0	0	4	0	0	4	0	0	0	0	0	0	0	0	0	0	0	0	3	0	0
X1943	Bacillariophyta	Bacillariophyta_X	Radial-centric-basal-Coscinodiscophyceae	Actinocyclus	Actinocyclus_curvatulus	0	0	0	0	0	0	0	0	0	0	0	0	0	0	0	0	0	0	0	0	0	0	0	0	0	0	0	0	0	0	0	0	0	0	0	0	0	0	0	0	0	0	0	0
X421	Bacillariophyta	Bacillariophyta_X	Radial-centric-basal-Coscinodiscophyceae	Actinocyclus	Actinocyclus_sp.	1	0	0	0	0	0	0	0	0	0	0	0	0	0	0	0	0	0	0	6	0	0	0	0	0	0	0	0	0	0	0	0	6	0	0	0	0	0	0	0	0	0	0	0
X1592	Bacillariophyta	Bacillariophyta_X	Radial-centric-basal-Coscinodiscophyceae	Actinoptychus	Actinoptychus_sp.	0	0	0	0	0	0	0	0	0	0	0	0	0	0	0	0	0	0	0	0	0	0	0	0	0	0	0	0	1	0	0	0	2	0	0	0	0	0	0	0	0	0	0	0
X2451	Bacillariophyta	Bacillariophyta_X	Radial-centric-basal-Coscinodiscophyceae	Actinoptychus	Actinoptychus_undulatus	0	0	0	1	0	0	0	0	0	0	0	0	0	0	0	0	0	0	0	0	0	0	0	0	0	0	0	0	0	0	0	0	0	0	0	0	0	0	0	0	0	0	0	0
X250	Bacillariophyta	Bacillariophyta_X	Radial-centric-basal-Coscinodiscophyceae	Actinoptychus	Actinoptychus_undulatus	0	0	2	1	0	1	12	0	0	1	0	0	2	0	0	0	0	0	0	5	0	0	0	0	0	0	0	0	0	0	0	1	12	0	0	0	0	0	0	0	0	0	0	0
X845	Bacillariophyta	Bacillariophyta_X	Radial-centric-basal-Coscinodiscophyceae	Actinoptychus	Actinoptychus_splendens	0	0	0	0	0	0	0	0	0	0	0	0	0	0	0	0	0	0	0	4	0	0	0	0	0	0	0	0	0	0	0	0	1	0	0	0	0	0	0	0	0	0	0	0
X1575	Bacillariophyta	Bacillariophyta_X	Raphid-pennate	Amphora	Amphora_coffeaeformis	0	0	0	0	0	0	1	0	0	0	0	0	0	0	1	2	0	0	0	0	0	0	0	0	0	0	0	2	0	1	0	1	0	0	0	0	0	0	0	0	0	1	0	0
X3018	Bacillariophyta	Bacillariophyta_X	Raphid-pennate	Amphora	NA	0	0	0	1	0	0	0	0	0	0	0	0	0	0	1	0	0	1	1	0	0	1	1	0	0	0	0	0	0	0	0	0	0	2	0	0	0	0	0	0	0	0	0	0
X322	Bacillariophyta	Bacillariophyta_X	Polar-centric-Mediophyceae	Arcocellulus	Arcocellulus_cornucervis	19	30	63	68	34	62	81	44	34	114	44	17	54	34	60	83	31	50	24	3	11	25	16	17	20	10	13	23	21	25	18	23	1	19	9	9	7	0	8	3	0	3	2	0
X1529	Bacillariophyta	Bacillariophyta_X	Araphid-pennate	Asterionella	Asterionella_japonica	0	0	0	0	0	0	0	0	0	0	0	0	0	0	0	0	0	0	0	0	0	0	0	0	0	0	0	0	0	0	0	0	0	0	0	0	0	0	0	0	0	0	0	0
X2627	Bacillariophyta	Bacillariophyta_X	Araphid-pennate	Asterionella	Asterionella_japonica	0	0	0	0	0	0	0	0	0	0	0	0	0	0	0	0	0	0	0	0	0	0	0	0	0	0	0	0	0	0	0	0	0	0	0	0	0	0	0	0	0	0	0	0
X481	Bacillariophyta	Bacillariophyta_X	Araphid-pennate	Asterionellopsis	Asterionellopsis_glacialis	0	0	0	0	0	0	0	1	0	0	0	0	0	0	0	0	0	1	0	1	0	0	0	0	0	0	0	0	0	0	0	0	3	0	0	0	0	0	0	0	0	0	0	0
X635	Bacillariophyta	Bacillariophyta_X	Araphid-pennate	Asteroplanus	Asteroplanus_karianus	3	1	0	4	0	2	1	3	2	8	3	1	3	0	0	6	0	0	0	0	0	3	0	2	0	0	0	4	0	1	2	1	5	9	11	1	0	0	0	0	0	0	2	1
X3577	Bacillariophyta	Bacillariophyta_X	Polar-centric-Mediophyceae	Attheya	Attheya_sp.	0	0	0	0	0	0	0	0	0	0	0	0	0	0	0	0	0	0	0	0	0	0	0	0	0	0	0	0	0	0	0	0	0	0	0	0	0	0	0	0	0	0	0	0
X1915	Bacillariophyta	Bacillariophyta_X	Raphid-pennate	Bacillaria	Bacillaria_paxillifer	0	0	0	0	0	0	1	0	0	0	0	0	0	0	0	0	0	1	0	0	0	0	0	0	0	0	0	1	0	0	0	0	0	0	0	0	0	0	0	0	0	0	0	0
X2536	Bacillariophyta	Bacillariophyta_X	Polar-centric-Mediophyceae	Bacteriastrum	Bacteriastrum_hyalinum	1	0	0	0	0	0	0	0	0	0	0	0	0	0	0	0	0	0	0	0	0	0	0	0	0	0	0	0	0	0	0	0	0	0	0	0	0	0	0	0	0	0	0	0
X1291	Bacillariophyta	Bacillariophyta_X	Raphid-pennate	Berkeleya	Berkeleya_rutilans	0	0	0	0	0	0	0	1	0	0	0	0	0	0	0	0	0	1	1	0	0	0	0	1	0	0	1	2	1	0	0	0	0	1	0	0	0	0	0	3	0	2	0	1
X3399	Bacillariophyta	Bacillariophyta_X	Polar-centric-Mediophyceae	Biddulphia	Biddulphia_alternans	0	0	0	0	0	0	0	0	0	0	0	0	0	0	0	0	0	0	0	0	0	0	0	0	0	0	0	0	0	0	0	0	0	0	0	0	0	0	0	0	0	0	0	0
X1493	Bacillariophyta	Bacillariophyta_X	Polar-centric-Mediophyceae	Brockmanniella	Brockmanniella brockmannii	0	0	0	0	0	0	0	6	0	0	0	0	0	0	0	0	0	0	0	0	0	0	0	0	0	0	0	0	0	0	0	0	0	0	0	0	0	0	0	0	0	0	0	0
X3028	Bacillariophyta	Bacillariophyta_X	Polar-centric-Mediophyceae	Brockmanniella	Brockmanniella_brockmannii	0	0	0	0	0	0	0	0	0	0	0	0	0	0	0	0	0	0	0	0	0	0	0	0	0	0	0	0	0	0	0	0	0	0	0	0	0	0	0	0	0	0	0	0
X332	Bacillariophyta	Bacillariophyta_X	Polar-centric-Mediophyceae	Brockmanniella	Brockmanniella_brockmannii	15	6	25	25	0	18	29	12	15	30	17	2	6	0	6	9	2	5	3	2	1	1	9	0	0	1	3	10	4	2	0	0	4	9	2	0	0	0	1	0	0	1	2	0
X73	Bacillariophyta	Bacillariophyta_X	Polar-centric-Mediophyceae	Brockmanniella	Brockmanniella brockmannii	55	34	83	116	181	132	209	104	66	181	71	13	71	67	63	55	25	24	33	4	15	42	21	33	33	39	28	74	56	64	63	73	3	83	22	25	36	41	83	56	13	41	27	17
X3406	Bacillariophyta	Bacillariophyta_X	Araphid-pennate	Catacombas	Catacombas_gaillonii	0	0	0	0	0	0	0	0	0	0	0	0	0	0	0	0	0	0	0	0	0	0	0	0	0	0	0	0	0	0	0	0	0	0	0	0	0	0	0	0	0	0	0	0
X1078	Bacillariophyta	Bacillariophyta_X	Polar-centric-Mediophyceae	Cerataulina	Cerataulina_pelagica	0	0	0	0	0	0	0	0	0	0	0	0	0	0	0	0	0	0	0	0	0	0	0	0	0	0	0	0	0	0	0	0	0	0	0	0	0	0	0	0	0	2	0	0
X12	Bacillariophyta	Bacillariophyta_X	Polar-centric-Mediophyceae	Cerataulina	Cerataulina_pelagica	0	0	2	1	0	0	0	0	0	0	0	0	1	0	0	0	3	0	0	15	1	0	1	0	3	7	1	3	11	3	3	14	235	0	2	2	0	2	3	8	27	93	46	39
X1351	Bacillariophyta	Bacillariophyta_X	Polar-centric-Mediophyceae	Cerataulina	Cerataulina_pelagica	0	0	0	0	0	0	0	0	0	0	0	0	0	0	0	0	0	0	0	0	0	0	0	0	0	0	0	0	0	0	0	0	1	1	0	0	0	0	0	0	0	1	0	0
X1741	Bacillariophyta	Bacillariophyta_X	Polar-centric-Mediophyceae	Cerataulina	Cerataulina_pelagica	0	0	0	0	0	0	0	0	0	0	0	0	0	0	0	0	0	0	0	0	0	0	0	0	0	0	0	0	0	0	0	0	0	0	0	0	0	0	0	0	0	0	0	0
X1824	Bacillariophyta	Bacillariophyta_X	Polar-centric-Mediophyceae	Cerataulina	Cerataulina_pelagica	0	0	0	0	0	0	0	0	0	0	0	0	0	0	0	0	0	0	0	0	0	0	0	0	0	0	0	0	0	0	0	0	0	0	0	0	0	0	0	0	0	0	0	0
X1879	Bacillariophyta	Bacillariophyta_X	Polar-centric-Mediophyceae	Cerataulina	Cerataulina_pelagica	0	0	0	0	0	0	0	0	0	0	0	0	0	0	0	0	0	0	0	0	0	0	0	0	0	0	0	0	0	0	0	0	0	0	0	0	0	0	0	0	0	0	0	0
X1923	Bacillariophyta	Bacillariophyta_X	Polar-centric-Mediophyceae	Cerataulina	Cerataulina_pelagica	0	0	0	0	0	0	0	0	0	0	0	0	0	0	0	0	0	0	0	0	0	0	0	0	0	0	0	0	0	0	0	0	0	0	0	0	0	0	0	0	0	1	0	0
X2203	Bacillariophyta	Bacillariophyta_X	Polar-centric-Mediophyceae	Cerataulina	Cerataulina_pelagica	0	0	0	0	0	0	0	0	0	0	0	0	0	0	0	0	0	0	0	0	0	0	0	0	0	0	0	0	0	0	0	0	0	0	0	0	0	0	0	0	0	0	0	0
X2283	Bacillariophyta	Bacillariophyta_X	Polar-centric-Mediophyceae	Cerataulina	Cerataulina_pelagica	0	0	0	0	0	0	0	0	0	0	0	0	0	0	0	0	0	0	0	0	0	0	0	0	0	0	0	0	0	0	0	0	0	0	0	0	0	0	0	0	0	0	0	0
X2478	Bacillariophyta	Bacillariophyta_X	Polar-centric-Mediophyceae	Cerataulina	Cerataulina_pelagica	0	0	0	0	0	0	0	0	0	0	0	0	0	0	0	0	0	0	0	0	0	0	0	0	0	0	0	0	0	0	0	0	0	0	0	0	0	0	0	0	0	0	0	0
X2595	Bacillariophyta	Bacillariophyta_X	Polar-centric-Mediophyceae	Cerataulina	Cerataulina_pelagica	0	0	0	0	0	0	0	0	0	0	0	0	0	0	0	0	0	0	0	0	0	0	0	0	0	0	0	0	0	0	0	0	0	0	0	0	0	0	0	0	0	0	0	0
X2756	Bacillariophyta	Bacillariophyta_X	Polar-centric-Mediophyceae	Cerataulina	Cerataulina_pelagica	0	0	0	0	0	0	0	0	0	0	0	0	0	0	0	0	0	0	0	0	0	0	0	0	0	0	0	0	0	0	0	0	0	0	0	0	0	0	0	0	0	0	0	0
X594	Bacillariophyta	Bacillariophyta_X	Polar-centric-Mediophyceae	Cerataulina	Cerataulina_pelagica	0	0	0	0	0	0	0	0	0	0	0	0	0	0	0	0	0	0	0	0	0	0	0	0	0	0	0	0	0	0	0	0	1	0	0	0	0	0	0	0	0	0	0	0
X626	Bacillariophyta	Bacillariophyta_X	Polar-centric-Mediophyceae	Cerataulina	Cerataulina_pelagica	0	0	0	0	0	0	0	0	0	0	0	0	0	0	0	0	0	0	0	0	0	0	0	0	0	0	0	0	0	0	0	0	2	0	0	0	0	0	0	0	0	0	0	0
X1061	Bacillariophyta	Bacillariophyta_X	Polar-centric-Mediophyceae	Cerataulus	Cerataulus_smithii	0	0	0	2	0	0	1	0	0	0	0	0	0	0	0	0	0	0	0	0	0	0	0	0	0	0	0	0	0	0	0	0	0	0	0	0	0	0	0	0	0	0	0	0
X2986	Bacillariophyta	Bacillariophyta_X	Polar-centric-Mediophyceae	Cerataulus	Cerataulus_smithii	0	0	0	0	0	0	0	0	0	0	0	0	0	0	0	0	0	0	0	0	0	0	0	0	0	0	0	0	0	0	0	0	0	0	0	0	0	0	0	0	0	0	0	0
X3006	Bacillariophyta	Bacillariophyta_X	Polar-centric-Mediophyceae	Cerataulus	Cerataulus_smithii	0	0	0	0	0	0	0	0	0	0	0	0	0	0	0	0	0	0	0	0	0	0	0	0	0	0	0	0	0	0	0	0	0	0	0	0	0	0	0	0	0	0	0	0
X3160	Bacillariophyta	Bacillariophyta_X	Polar-centric-Mediophyceae	Cerataulus	Cerataulus_smithii	0	0	0	0	0	0	0	0	0	0	0	0	0	0	0	0	0	0	0	0	0	0	0	0	0	0	0	0	0	0	0	0	0	0	0	0	0	0	0	0	0	0	0	0
X1042	Bacillariophyta	Bacillariophyta_X	Polar-centric-Mediophyceae	Chaetoceros	Chaetoceros_dichaeta	0	0	0	0	0	0	0	0	0	0	0	0	0	0	0	0	0	0	0	0	0	0	0	0	0	0	0	0	0	0	0	0	0	0	0	0	0	0	0	0	0	0	0	0
X1116	Bacillariophyta	Bacillariophyta_X	Polar-centric-Mediophyceae	Chaetoceros	Chaetoceros_throndsenii	0	0	0	0	0	0	0	0	0	0	1	0	0	0	0	0	0	0	0	1	0	0	0	0	0	0	0	0	0	0	0	0	1	0	0	0	0	0	0	0	0	0	0	0
X1152	Bacillariophyta	Bacillariophyta_X	Polar-centric-Mediophyceae	Chaetoceros	Chaetoceros_didymus_1	0	0	0	0	0	0	0	0	0	0	0	0	0	0	0	0	1	0	0	0	0	0	0	0	0	0	0	0	0	0	1	0	0	0	0	0	0	0	0	0	0	2	1	0
X1309	Bacillariophyta	Bacillariophyta_X	Polar-centric-Mediophyceae	Chaetoceros	Chaetoceros_tenuissimus	0	0	0	0	0	0	1	2	1	0	0	0	0	0	0	2	2	1	0	2	0	2	0	1	0	2	4	0	2	2	6	6	0	0	0	2	4	5	2	3	8	5	1	3
X1338	Bacillariophyta	Bacillariophyta_X	Polar-centric-Mediophyceae	Chaetoceros	Chaetoceros_dichaeta	0	0	0	0	0	0	0	0	0	0	0	0	0	0	0	0	0	0	0	0	0	0	0	0	0	0	0	0	0	0	0	0	0	0	0	0	0	0	0	0	0	0	0	0
X1395	Bacillariophyta	Bacillariophyta_X	Polar-centric-Mediophyceae	Chaetoceros	Chaetoceros_radicans	0	0	0	0	0	0	0	0	0	0	0	0	0	0	0	0	0	0	0	0	0	0	0	0	0	0	0	0	0	0	0	0	0	0	0	0	0	0	0	0	0	0	0	0
X148	Bacillariophyta	Bacillariophyta_X	Polar-centric-Mediophyceae	Chaetoceros	Chaetoceros_dichaeta	0	0	0	0	0	0	0	0	0	0	0	0	0	0	0	0	0	0	0	0	0	0	0	0	0	0	0	0	0	0	0	0	0	0	0	0	0	0	0	0	0	0	0	0
X1556	Bacillariophyta	Bacillariophyta_X	Polar-centric-Mediophyceae	Chaetoceros	Chaetoceros_throndsenii	0	0	0	0	0	0	0	0	0	0	0	0	1	0	0	0	0	0	0	0	0	0	0	0	0	0	0	0	0	0	0	0	0	0	0	0	0	0	0	0	0	0	0	0
X1622	Bacillariophyta	Bacillariophyta_X	Polar-centric-Mediophyceae	Chaetoceros	Chaetoceros_brevis_1	0	0	0	0	0	0	0	0	0	0	0	0	0	0	0	0	0	0	0	0	0	0	0	0	0	0	0	0	0	0	0	0	0	0	0	0	0	0	0	0	0	0	0	0
X1671	Bacillariophyta	Bacillariophyta_X	Polar-centric-Mediophyceae	Chaetoceros	Chaetoceros_dichaeta	0	0	0	0	0	0	0	0	0	0	0	0	0	0	0	0	0	0	0	0	0	0	0	0	0	0	0	0	0	0	0	0	0	0	0	0	0	0	0	0	0	0	0	0
X1687	Bacillariophyta	Bacillariophyta_X	Polar-centric-Mediophyceae	Chaetoceros	NA	0	0	0	0	0	0	0	0	0	0	0	0	0	0	0	0	0	0	0	0	0	0	0	0	0	0	0	0	0	0	0	0	0	0	0	0	0	0	0	0	0	1	1	0
X174	Bacillariophyta	Bacillariophyta_X	Polar-centric-Mediophyceae	Chaetoceros	Chaetoceros_socialis	5	2	6	6	3	5	2	0	1	6	2	0	0	2	1	12	10	15	13	12	7	25	5	5	10	13	11	35	30	34	19	39	21	22	16	13	4	11	12	18	45	51	56	67
X1900	Bacillariophyta	Bacillariophyta_X	Polar-centric-Mediophyceae	Chaetoceros	Chaetoceros_danicus	0	0	0	0	0	0	0	0	0	0	0	0	0	0	0	2	0	1	0	0	0	0	0	0	0	0	0	0	0	0	0	0	0	0	0	0	0	0	0	0	0	0	0	0
X204	Bacillariophyta	Bacillariophyta_X	Polar-centric-Mediophyceae	Chaetoceros	Chaetoceros_throndsenii	0	0	0	0	2	1	10	1	0	0	0	0	1	1	0	0	1	0	0	7	0	3	0	0	0	0	0	0	1	0	0	0	17	0	0	3	0	0	0	0	0	0	0	0
X2143	Bacillariophyta	Bacillariophyta_X	Polar-centric-Mediophyceae	Chaetoceros	Chaetoceros_dichaeta	0	0	0	0	0	0	0	0	0	0	0	0	0	0	0	0	0	0	0	0	0	0	0	0	0	0	0	0	0	0	0	0	0	0	0	0	0	0	0	0	0	0	0	0
X2319	Bacillariophyta	Bacillariophyta_X	Polar-centric-Mediophyceae	Chaetoceros	NA	0	0	0	0	0	0	0	0	0	0	0	0	0	0	0	0	0	0	0	0	0	0	0	0	0	0	0	0	0	0	0	0	0	0	0	0	0	0	0	0	0	0	0	0
X2338	Bacillariophyta	Bacillariophyta_X	Polar-centric-Mediophyceae	Chaetoceros	Chaetoceros_teres	0	0	0	0	0	0	0	0	0	0	0	0	0	0	0	0	0	0	0	0	0	0	0	0	0	0	0	0	0	0	0	0	0	0	0	0	0	0	0	0	0	0	0	0
X2389	Bacillariophyta	Bacillariophyta_X	Polar-centric-Mediophyceae	Chaetoceros	Chaetoceros_teres	0	0	0	0	0	0	0	0	0	0	0	0	0	0	0	0	0	0	0	0	0	0	0	0	0	0	0	0	0	0	0	0	0	0	0	0	0	0	0	0	0	0	0	0
X2390	Bacillariophyta	Bacillariophyta_X	Polar-centric-Mediophyceae	Chaetoceros	Chaetoceros_debilis	0	0	0	0	0	0	0	0	0	0	0	0	0	0	0	0	0	0	0	0	0	0	0	0	0	0	0	0	0	0	0	0	0	0	0	0	0	0	0	0	0	0	0	0
X2413	Bacillariophyta	Bacillariophyta_X	Polar-centric-Mediophyceae	Chaetoceros	NA	0	0	0	0	0	0	0	0	0	0	0	0	0	0	0	0	0	0	0	0	0	0	0	0	0	0	0	0	0	0	0	0	0	0	1	0	0	0	0	0	0	0	0	0
X242	Bacillariophyta	Bacillariophyta_X	Polar-centric-Mediophyceae	Chaetoceros	Chaetoceros_dichatoensis	0	3	0	0	0	0	0	0	0	1	0	0	0	0	0	8	5	6	11	10	2	14	2	1	14	8	25	91	47	101	44	39	29	51	34	52	18	27	25	50	100	85	81	79
X2438	Bacillariophyta	Bacillariophyta_X	Polar-centric-Mediophyceae	Chaetoceros	Chaetoceros_teres	0	0	0	0	0	0	0	0	0	0	0	0	0	0	0	1	4	0	0	0	0	0	0	0	0	0	0	0	0	1	0	0	0	0	0	0	0	0	0	0	0	0	0	0
X254	Bacillariophyta	Bacillariophyta_X	Polar-centric-Mediophyceae	Chaetoceros	Chaetoceros_danicus	0	0	0	4	2	1	0	1	2	5	3	0	3	7	3	14	0	2	0	5	1	1	5	0	1	1	1	0	6	3	9	5	14	5	1	7	0	1	1	2	4	2	1	7
X2720	Bacillariophyta	Bacillariophyta_X	Polar-centric-Mediophyceae	Chaetoceros	NA	0	0	0	0	0	0	0	0	0	0	0	0	0	0	0	0	0	0	0	0	0	0	0	0	0	0	0	0	0	0	0	0	0	0	0	0	0	0	0	0	0	0	0	0
X2893	Bacillariophyta	Bacillariophyta_X	Polar-centric-Mediophyceae	Chaetoceros	Chaetoceros_contortus_cf_var_contortus	0	0	0	0	0	0	0	0	0	0	0	0	0	0	0	0	0	0	0	0	0	0	0	0	0	0	0	0	0	0	0	0	0	0	0	0	0	0	0	0	0	0	0	0
X2895	Bacillariophyta	Bacillariophyta_X	Polar-centric-Mediophyceae	Chaetoceros	NA	0	0	0	0	0	0	0	0	0	0	0	0	0	0	0	0	0	0	0	0	0	0	0	0	0	0	0	0	0	0	0	0	0	0	0	0	0	0	0	0	0	0	0	0
X2929	Bacillariophyta	Bacillariophyta_X	Polar-centric-Mediophyceae	Chaetoceros	NA	0	0	0	0	0	0	0	0	0	0	0	0	0	0	0	0	0	0	0	0	0	0	0	0	0	0	0	0	0	0	0	0	0	0	0	0	0	0	0	0	0	0	0	0
X30	Bacillariophyta	Bacillariophyta_X	Polar-centric-Mediophyceae	Chaetoceros	NA	2	0	0	0	0	2	0	0	0	1	0	0	1	1	1	0	3	0	1	2	1	3	4	0	2	5	3	9	8	5	22	20	23	20	20	15	45	53	156	240	238	188	137	80
X3120	Bacillariophyta	Bacillariophyta_X	Polar-centric-Mediophyceae	Chaetoceros	Chaetoceros_contortus	0	0	0	0	0	0	0	0	0	0	0	0	0	0	0	0	0	0	0	0	0	0	0	0	0	0	0	0	0	0	0	0	0	0	0	0	0	0	0	0	0	0	0	0
X3144	Bacillariophyta	Bacillariophyta_X	Polar-centric-Mediophyceae	Chaetoceros	Chaetoceros_danicus	0	0	0	0	0	0	0	0	0	0	0	0	0	0	0	0	0	0	0	0	0	0	0	0	0	0	0	0	0	0	0	0	0	0	0	0	0	0	0	0	0	0	0	0
X317	Bacillariophyta	Bacillariophyta_X	Polar-centric-Mediophyceae	Chaetoceros	Chaetoceros_cf_convolutus	0	0	0	0	0	0	9	0	0	0	0	0	0	0	1	2	0	0	0	0	5	0	0	0	0	2	0	4	2	1	6	0	0	1	0	0	0	0	3	0	0	3	0	0
X3203	Bacillariophyta	Bacillariophyta_X	Polar-centric-Mediophyceae	Chaetoceros	NA	0	0	0	0	0	0	0	0	0	0	0	0	0	0	0	0	0	0	0	0	0	0	0	0	0	0	0	0	0	0	0	0	0	0	0	0	0	0	0	0	0	0	0	0
X3548	Bacillariophyta	Bacillariophyta_X	Polar-centric-Mediophyceae	Chaetoceros	Chaetoceros_pumilum	0	0	0	0	0	0	0	0	0	0	0	0	1	0	0	0	0	1	0	0	0	0	0	0	0	0	0	0	0	0	0	0	0	0	0	0	0	0	0	0	0	0	0	0
X3641	Bacillariophyta	Bacillariophyta_X	Polar-centric-Mediophyceae	Chaetoceros	Chaetoceros_teres	0	0	0	0	0	0	0	0	0	0	0	0	0	0	0	0	0	0	0	0	0	0	0	0	0	0	0	0	0	0	0	0	0	0	0	0	0	0	0	0	0	0	0	0
X37	Bacillariophyta	Bacillariophyta_X	Polar-centric-Mediophyceae	Chaetoceros	Chaetoceros_teres	0	0	0	1	0	1	2	0	1	0	0	0	1	0	4	113	87	55	12	6	16	5	8	3	0	1	3	0	5	0	4	3	8	1	0	0	0	3	8	0	0	0	0	0
X374	Bacillariophyta	Bacillariophyta_X	Polar-centric-Mediophyceae	Chaetoceros	Chaetoceros_throndsenii	0	1	0	0	0	0	0	0	0	0	0	0	0	0	0	0	1	0	0	0	0	0	0	0	0	0	0	0	0	1	0	0	0	0	0	0	0	0	0	0	0	0	0	0
X3817	Bacillariophyta	Bacillariophyta_X	Polar-centric-Mediophyceae	Chaetoceros	NA	0	0	0	0	0	0	0	0	0	0	0	0	0	0	0	0	0	0	0	0	0	0	0	0	0	0	0	0	0	0	0	0	0	0	0	0	0	0	0	0	0	0	0	0
X385	Bacillariophyta	Bacillariophyta_X	Polar-centric-Mediophyceae	Chaetoceros	Chaetoceros_cf_convolutus	0	0	0	0	0	0	0	0	0	0	0	0	0	0	0	0	0	0	0	1	2	1	0	0	0	10	0	5	1	0	1	6	4	0	1	13	1	0	5	15	24	33	24	20
X3916	Bacillariophyta	Bacillariophyta_X	Polar-centric-Mediophyceae	Chaetoceros	NA	0	0	0	0	0	0	0	0	0	0	0	0	0	0	0	0	0	0	0	0	0	0	0	0	0	0	0	0	0	0	0	0	0	0	0	0	0	0	0	0	0	0	0	0
X3960	Bacillariophyta	Bacillariophyta_X	Polar-centric-Mediophyceae	Chaetoceros	Chaetoceros_protuberans	0	0	0	0	0	0	0	0	1	0	0	0	0	0	0	0	0	0	0	0	0	0	0	0	0	0	0	0	0	0	0	0	1	0	0	0	0	0	0	0	0	0	0	0
X4232	Bacillariophyta	Bacillariophyta_X	Polar-centric-Mediophyceae	Chaetoceros	NA	0	0	0	0	0	0	0	0	0	0	0	0	0	0	0	0	0	0	0	0	0	0	0	0	0	0	0	0	0	0	0	0	0	0	0	0	0	0	0	0	0	0	0	0
X4437	Bacillariophyta	Bacillariophyta_X	Polar-centric-Mediophyceae	Chaetoceros	NA	0	0	0	0	0	0	0	0	0	0	0	0	0	0	0	0	0	0	0	0	0	0	0	0	0	0	0	0	0	0	0	1	0	0	0	0	0	0	0	0	0	0	0	0
X483	Bacillariophyta	Bacillariophyta_X	Polar-centric-Mediophyceae	Chaetoceros	Chaetoceros_decipiens	0	0	0	0	0	0	0	0	0	0	0	0	0	0	0	0	0	0	0	0	1	0	1	0	2	0	1	0	1	0	0	0	0	0	0	0	0	0	0	0	0	1	0	0
X507	Bacillariophyta	Bacillariophyta_X	Polar-centric-Mediophyceae	Chaetoceros	Chaetoceros_eibenii	0	0	0	0	0	0	0	0	0	0	0	0	0	0	0	6	4	8	2	15	33	0	2	0	0	27	4	15	63	8	5	16	11	11	0	0	0	2	2	0	0	4	0	1
X51	Bacillariophyta	Bacillariophyta_X	Polar-centric-Mediophyceae	Chaetoceros	Chaetoceros_diadema_1	0	0	0	0	0	0	0	0	0	0	0	0	0	0	0	2	3	4	5	11	0	3	5	1	4	5	5	8	37	18	22	23	54	2	2	5	0	1	1	1	0	1	1	0
X570	Bacillariophyta	Bacillariophyta_X	Polar-centric-Mediophyceae	Chaetoceros	NA	0	0	0	0	0	0	0	0	0	0	0	0	0	0	0	0	0	0	0	0	0	0	0	0	0	0	0	0	0	0	0	0	0	0	0	0	0	0	0	0	0	0	0	0
X62	Bacillariophyta	Bacillariophyta_X	Polar-centric-Mediophyceae	Chaetoceros	Chaetoceros_debilis_1	0	0	0	0	0	0	0	0	0	0	0	0	0	1	0	45	39	18	10	14	5	9	15	11	13	29	15	49	80	40	81	43	109	12	5	16	6	2	3	5	10	1	0	0
X631	Bacillariophyta	Bacillariophyta_X	Polar-centric-Mediophyceae	Chaetoceros	Chaetoceros_debilis	0	0	0	1	0	0	0	0	0	0	0	0	0	0	0	0	3	0	0	1	0	0	0	0	0	0	1	0	0	0	0	0	0	0	0	0	0	0	0	0	0	0	0	0
X759	Bacillariophyta	Bacillariophyta_X	Polar-centric-Mediophyceae	Chaetoceros	Chaetoceros_radicans	0	0	0	0	0	0	0	0	0	0	0	0	0	0	0	0	0	0	0	0	0	0	0	0	0	0	0	0	0	0	0	0	0	0	0	0	0	0	0	0	0	0	0	0
X804	Bacillariophyta	Bacillariophyta_X	Polar-centric-Mediophyceae	Chaetoceros	Chaetoceros_anastomosans	0	0	0	0	0	0	0	0	0	0	0	0	0	0	0	0	0	0	0	0	0	0	0	0	0	0	0	0	0	0	0	0	0	0	0	0	0	0	0	0	0	0	0	0
X834	Bacillariophyta	Bacillariophyta_X	Polar-centric-Mediophyceae	Chaetoceros	Chaetoceros_throndsenii	0	0	0	0	0	0	0	0	0	0	0	0	0	0	0	0	0	0	0	0	0	0	0	0	0	0	0	0	0	0	0	0	0	0	0	0	0	0	0	0	0	1	0	0
X92	Bacillariophyta	Bacillariophyta_X	Polar-centric-Mediophyceae	Chaetoceros	Chaetoceros_contortus	0	0	0	0	0	0	0	0	0	0	0	0	0	0	0	0	0	0	0	0	0	0	0	0	0	0	0	0	0	0	0	0	0	0	0	0	0	0	0	0	0	0	0	1
X921	Bacillariophyta	Bacillariophyta_X	Polar-centric-Mediophyceae	Chaetoceros	Chaetoceros_curvisetus_1	0	0	0	0	0	0	0	0	0	0	0	0	0	0	0	0	0	2	1	0	0	0	0	0	0	0	1	0	0	0	2	0	0	0	0	0	0	0	0	1	0	1	1	3
X946	Bacillariophyta	Bacillariophyta_X	Polar-centric-Mediophyceae	Chaetoceros	Chaetoceros_danicus	0	0	0	1	0	0	0	2	1	0	0	0	0	0	0	2	0	0	0	1	0	0	0	0	0	0	0	0	0	0	0	0	3	0	0	0	0	0	1	1	0	0	1	0
X490	Bacillariophyta	Bacillariophyta_X	Raphid-pennate	Cocconeis	Cocconeis_stauroneiformis	0	0	0	0	0	0	0	1	0	6	0	0	0	0	3	2	5	6	1	1	0	1	6	0	0	2	0	4	2	0	0	2	1	5	0	1	0	0	3	3	0	3	3	1
X337	Bacillariophyta	Bacillariophyta_X	Radial-centric-basal-Coscinodiscophyceae	Corethron	Corethron_hystrix	0	0	0	0	3	0	0	1	0	2	0	0	0	0	0	1	0	0	0	11	0	0	3	0	0	0	0	0	0	0	0	1	18	1	0	0	0	0	0	0	0	0	0	0
X1132	Bacillariophyta	Bacillariophyta_X	Radial-centric-basal-Coscinodiscophyceae	Coscinodiscus	Coscinodiscus_granii	1	0	0	0	0	0	0	0	0	0	0	0	0	0	0	0	0	0	0	0	0	0	0	0	0	0	0	0	0	0	0	1	0	0	0	0	0	0	0	0	0	0	0	0
X115	Bacillariophyta	Bacillariophyta_X	Radial-centric-basal-Coscinodiscophyceae	Coscinodiscus	Coscinodiscus_wailesii	0	0	0	1	1	0	0	0	0	0	0	0	0	0	0	0	0	0	0	0	3	0	0	0	0	1	4	5	2	0	2	0	0	1	0	2	0	2	0	0	0	0	1	0
X1496	Bacillariophyta	Bacillariophyta_X	Radial-centric-basal-Coscinodiscophyceae	Coscinodiscus	Coscinodiscus_sp.	0	0	0	0	0	0	0	0	0	0	0	0	0	0	0	0	0	0	0	0	0	0	0	0	0	0	0	0	0	0	0	0	0	0	0	0	0	0	0	0	0	0	0	0
X1624	Bacillariophyta	Bacillariophyta_X	Radial-centric-basal-Coscinodiscophyceae	Coscinodiscus	Coscinodiscus_radiatus	0	0	0	0	0	0	0	0	0	0	0	0	0	0	0	0	0	0	0	0	0	0	0	0	0	0	0	0	0	0	0	0	0	0	0	0	0	0	0	0	0	0	0	0
X195	Bacillariophyta	Bacillariophyta_X	Radial-centric-basal-Coscinodiscophyceae	Coscinodiscus	Coscinodiscus_sp.	0	0	0	0	0	0	0	0	1	0	0	0	0	0	0	1	0	1	1	2	8	0	0	0	1	0	0	0	0	0	0	0	9	0	0	0	0	0	0	0	1	0	0	0
X402	Bacillariophyta	Bacillariophyta_X	Radial-centric-basal-Coscinodiscophyceae	Coscinodiscus	Coscinodiscus_radiatus	0	0	0	0	0	0	7	0	0	0	0	0	0	0	0	0	0	0	1	3	0	0	0	0	0	0	0	0	0	0	0	0	20	0	0	0	0	0	0	0	0	0	0	0
X758	Bacillariophyta	Bacillariophyta_X	Polar-centric-Mediophyceae	Cyclotella	Cyclotella_meneghiniana	1	3	2	9	2	5	6	5	1	6	3	1	2	2	5	6	4	5	11	0	2	16	1	8	8	5	1	12	2	9	6	20	2	12	14	8	12	3	3	2	0	4	0	3
X135	Bacillariophyta	Bacillariophyta_X	Raphid-pennate	Cylindrotheca	Cylindrotheca_closterium	54	25	56	101	35	55	162	73	84	181	84	27	92	32	55	45	16	19	28	10	8	31	29	13	30	17	27	116	110	49	93	251	217	451	207	134	122	52	72	96	15	25	15	15
X2625	Bacillariophyta	Bacillariophyta_X	Raphid-pennate	Cymbella	NA	0	0	0	0	0	0	0	0	0	0	0	0	0	0	0	0	0	0	0	0	0	0	0	0	0	0	0	0	0	0	0	0	0	0	0	0	0	0	0	0	0	0	0	0
X3463	Bacillariophyta	Bacillariophyta_X	Raphid-pennate	Cymbella	NA	0	0	0	0	0	0	0	0	0	0	0	0	0	0	0	0	0	2	0	0	0	0	0	0	0	0	0	0	0	0	0	0	0	0	0	0	0	0	0	0	0	0	0	0
X747	Bacillariophyta	Bacillariophyta_X	Raphid-pennate	Cymbella	NA	0	0	0	0	0	1	5	1	1	0	0	0	1	0	0	0	0	9	1	0	3	0	1	0	0	1	1	0	2	0	1	0	0	15	2	7	0	3	0	0	0	0	0	1
X2672	Bacillariophyta	Bacillariophyta_X	Araphid-pennate	Delphineis	Delphineis_sp.	0	0	0	1	0	0	2	0	0	3	0	0	0	0	0	1	0	0	0	0	0	0	0	0	0	0	0	0	0	0	0	0	0	0	0	0	0	0	0	0	0	0	0	0
X272	Bacillariophyta	Bacillariophyta_X	Araphid-pennate	Delphineis	Delphineis_sp.	3	2	6	6	1	5	4	6	2	16	4	1	4	2	3	6	3	1	2	8	1	1	3	1	0	0	5	1	1	0	1	0	8	2	1	1	0	0	1	0	0	0	1	0
X3664	Bacillariophyta	Bacillariophyta_X	Araphid-pennate	Delphineis	Delphineis_sp.	0	0	0	0	0	0	0	0	0	0	0	0	0	0	0	0	0	0	0	0	0	0	0	0	0	0	0	1	0	0	0	0	0	0	0	0	1	0	0	0	0	0	0	0
X10	Bacillariophyta	Bacillariophyta_X	Polar-centric-Mediophyceae	Ditylum	Ditylum_brightwellii	0	0	1	1	0	0	2	0	0	0	0	0	0	0	0	93	1068	643	88	4485	70	103	92	33	170	110	208	246	158	79	45	240	983	39	18	36	1	39	32	140	174	17	45	31
X1098	Bacillariophyta	Bacillariophyta_X	Polar-centric-Mediophyceae	Ditylum	Ditylum_brightwellii	0	0	0	0	0	0	0	0	0	0	0	0	0	0	0	0	0	0	0	3	0	0	0	0	2	0	0	1	0	0	0	0	1	0	0	0	0	0	0	0	1	0	0	0
X1517	Bacillariophyta	Bacillariophyta_X	Polar-centric-Mediophyceae	Ditylum	Ditylum_brightwellii	0	0	0	0	0	0	0	0	0	0	0	0	0	0	0	0	0	0	0	2	0	0	0	0	0	0	0	0	2	0	0	1	2	0	0	0	0	0	0	0	0	0	0	0
X1625	Bacillariophyta	Bacillariophyta_X	Polar-centric-Mediophyceae	Ditylum	Ditylum_brightwellii	0	0	0	0	0	0	0	0	0	0	0	0	0	0	0	0	0	1	0	2	0	1	0	0	0	0	0	1	0	0	0	0	0	0	0	0	0	0	0	0	0	0	0	0
X1666	Bacillariophyta	Bacillariophyta_X	Polar-centric-Mediophyceae	Ditylum	Ditylum_brightwellii	0	0	0	0	0	0	0	0	0	0	0	0	0	0	0	0	3	0	0	3	0	0	0	0	0	0	0	0	0	0	0	0	1	0	0	0	0	0	0	0	1	0	0	0
X1729	Bacillariophyta	Bacillariophyta_X	Polar-centric-Mediophyceae	Ditylum	Ditylum_brightwellii	0	0	0	0	0	0	0	0	0	0	0	0	0	0	0	0	0	0	0	2	0	0	0	0	0	0	0	0	0	0	0	0	0	0	0	0	0	0	0	0	0	0	0	0
X1760	Bacillariophyta	Bacillariophyta_X	Polar-centric-Mediophyceae	Ditylum	NA	0	0	0	0	0	0	0	0	0	0	0	0	0	0	0	0	0	28	1	0	0	0	0	0	1	0	0	3	0	0	0	0	1	0	0	1	0	0	0	1	0	0	2	0
X1762	Bacillariophyta	Bacillariophyta_X	Polar-centric-Mediophyceae	Ditylum	Ditylum_sol	0	0	0	0	0	0	0	0	0	0	0	0	0	0	0	0	0	2	0	0	0	0	0	0	0	0	0	0	0	0	0	0	0	0	0	0	0	0	0	0	0	0	0	0
X1863	Bacillariophyta	Bacillariophyta_X	Polar-centric-Mediophyceae	Ditylum	Ditylum_brightwellii	0	0	0	0	0	0	0	0	0	0	0	0	0	0	0	0	1	0	0	2	0	0	0	1	0	0	0	0	0	0	0	0	1	0	0	0	0	0	0	0	0	0	0	0
X2030	Bacillariophyta	Bacillariophyta_X	Polar-centric-Mediophyceae	Ditylum	Ditylum_brightwellii	0	0	0	0	0	0	0	0	0	0	0	0	0	0	0	0	0	0	0	0	0	0	0	0	0	0	0	0	0	0	0	0	1	0	0	0	0	0	0	0	0	0	0	0
X2229	Bacillariophyta	Bacillariophyta_X	Polar-centric-Mediophyceae	Ditylum	Ditylum_brightwellii	0	0	0	0	0	0	0	0	0	0	0	0	0	0	0	0	0	0	0	0	1	0	0	0	0	0	0	0	0	0	0	0	1	0	0	0	0	0	0	0	0	0	0	0
X2276	Bacillariophyta	Bacillariophyta_X	Polar-centric-Mediophyceae	Ditylum	Ditylum_brightwellii	0	0	0	0	0	0	0	0	0	0	0	0	0	0	0	0	2	0	0	1	0	0	0	0	0	0	0	0	0	0	0	0	0	0	0	0	0	0	0	0	0	0	0	0
X2495	Bacillariophyta	Bacillariophyta_X	Polar-centric-Mediophyceae	Ditylum	Ditylum_brightwellii	0	0	0	0	0	0	0	0	0	0	0	0	0	0	0	0	0	1	0	0	0	3	0	0	0	0	0	0	0	0	0	0	0	0	0	0	0	0	0	0	0	0	0	0
X2545	Bacillariophyta	Bacillariophyta_X	Polar-centric-Mediophyceae	Ditylum	Ditylum_sol	0	0	0	0	0	0	0	0	0	0	0	0	0	0	0	0	0	0	0	1	0	0	0	0	0	0	0	0	0	0	0	0	0	0	0	0	0	0	0	0	0	0	0	0
X2593	Bacillariophyta	Bacillariophyta_X	Polar-centric-Mediophyceae	Ditylum	Ditylum_brightwellii	0	0	0	0	0	0	0	0	0	0	0	0	0	0	0	0	0	0	0	0	0	0	0	0	0	0	0	0	0	0	0	0	1	0	0	0	0	0	0	0	0	0	0	0
X2618	Bacillariophyta	Bacillariophyta_X	Polar-centric-Mediophyceae	Ditylum	Ditylum_brightwellii	0	0	0	0	0	0	0	0	0	0	0	0	0	0	0	0	1	0	0	0	0	0	0	0	0	0	1	0	0	0	0	0	0	0	0	0	0	0	0	0	0	0	0	0
X2652	Bacillariophyta	Bacillariophyta_X	Polar-centric-Mediophyceae	Ditylum	Ditylum_brightwellii	0	0	0	0	0	0	0	0	0	0	0	0	0	0	0	0	0	0	0	0	0	0	0	0	0	0	0	0	0	0	0	0	0	0	0	0	0	0	0	0	0	0	0	0
X2684	Bacillariophyta	Bacillariophyta_X	Polar-centric-Mediophyceae	Ditylum	Ditylum_brightwellii	0	0	0	0	0	0	0	0	0	0	0	0	0	0	0	0	0	1	0	0	0	0	0	0	0	0	0	0	0	0	0	0	0	0	0	0	0	0	0	0	0	0	0	0
X2958	Bacillariophyta	Bacillariophyta_X	Polar-centric-Mediophyceae	Ditylum	Ditylum_brightwellii	0	0	0	0	0	0	0	0	0	0	0	0	0	0	0	0	1	0	0	1	0	1	0	0	0	0	0	0	0	0	0	0	0	0	0	0	0	0	0	0	0	0	0	0
X2995	Bacillariophyta	Bacillariophyta_X	Polar-centric-Mediophyceae	Ditylum	Ditylum_brightwellii	0	0	0	0	0	0	0	0	0	0	0	0	0	0	0	0	0	2	0	0	1	0	0	0	0	1	1	2	0	3	0	2	1	0	0	0	1	0	0	0	0	0	0	0
X3034	Bacillariophyta	Bacillariophyta_X	Polar-centric-Mediophyceae	Ditylum	Ditylum_brightwellii	0	0	0	0	0	0	0	0	0	0	0	0	0	0	0	0	0	0	0	0	0	0	0	0	0	0	0	0	0	0	0	0	0	0	0	0	0	0	0	0	2	0	0	0
X3104	Bacillariophyta	Bacillariophyta_X	Polar-centric-Mediophyceae	Ditylum	Ditylum_brightwellii	0	0	0	0	0	0	0	0	0	0	0	0	0	0	0	0	0	0	0	0	0	0	0	0	0	0	0	0	0	0	0	0	0	0	0	0	0	0	0	0	0	0	0	0
X3106	Bacillariophyta	Bacillariophyta_X	Polar-centric-Mediophyceae	Ditylum	Ditylum_brightwellii	0	0	0	0	0	0	0	0	0	0	0	0	0	0	0	0	0	0	0	1	0	0	0	0	0	0	0	0	0	0	1	0	0	0	0	0	0	0	0	0	0	0	0	0
X3196	Bacillariophyta	Bacillariophyta_X	Polar-centric-Mediophyceae	Ditylum	Ditylum_brightwellii	0	0	0	0	0	0	0	0	0	0	0	0	0	0	0	0	0	0	1	1	0	0	0	0	0	0	0	0	0	0	0	0	0	0	0	0	0	0	0	0	0	0	0	0
X3240	Bacillariophyta	Bacillariophyta_X	Polar-centric-Mediophyceae	Ditylum	Ditylum_brightwellii	0	0	0	0	0	0	0	0	0	0	0	0	0	0	0	0	0	0	0	0	0	0	0	0	0	0	0	0	0	0	0	0	0	0	0	0	0	0	0	0	0	0	0	0
X3241	Bacillariophyta	Bacillariophyta_X	Polar-centric-Mediophyceae	Ditylum	Ditylum_brightwellii	0	0	0	0	0	0	0	0	0	0	0	0	0	0	0	0	0	0	0	1	0	0	0	0	0	0	0	0	0	0	0	0	0	0	0	0	0	0	0	0	0	0	0	0
X3343	Bacillariophyta	Bacillariophyta_X	Polar-centric-Mediophyceae	Ditylum	Ditylum_brightwellii	0	0	0	0	0	0	0	0	0	0	0	0	0	0	0	0	1	0	0	0	0	0	0	0	0	0	0	0	0	0	0	0	1	0	0	0	0	0	0	0	0	0	0	0
X3402	Bacillariophyta	Bacillariophyta_X	Polar-centric-Mediophyceae	Ditylum	Ditylum_brightwellii	0	0	0	0	0	0	0	0	0	0	0	0	0	0	0	0	1	0	0	0	0	0	0	0	0	0	0	0	0	0	0	0	1	0	0	0	0	0	0	0	0	0	0	0
X4435	Bacillariophyta	Bacillariophyta_X	Polar-centric-Mediophyceae	Ditylum	Ditylum_sol	0	0	0	0	0	0	0	0	0	0	0	0	0	0	0	0	0	0	0	0	0	0	0	0	0	0	0	0	0	0	0	0	0	1	0	0	0	0	0	0	0	0	0	0
X469	Bacillariophyta	Bacillariophyta_X	Polar-centric-Mediophyceae	Ditylum	Ditylum_brightwellii	0	0	0	0	0	0	0	0	0	0	0	0	0	0	0	0	6	2	0	24	3	1	0	0	0	0	0	0	0	1	1	1	6	0	0	0	0	2	0	1	0	1	1	0
X641	Bacillariophyta	Bacillariophyta_X	Polar-centric-Mediophyceae	Ditylum	Ditylum_brightwellii	0	0	0	0	0	0	0	0	0	0	0	0	0	0	0	1	9	4	1	6	0	1	1	0	0	0	1	3	2	0	0	0	4	0	0	1	0	1	0	1	0	0	0	0
X667	Bacillariophyta	Bacillariophyta_X	Polar-centric-Mediophyceae	Ditylum	Ditylum_brightwellii	0	0	0	0	0	0	0	0	0	0	0	0	0	0	0	0	3	2	0	16	1	0	0	0	0	0	0	1	0	0	0	0	4	0	0	1	0	0	0	1	0	0	1	1
X674	Bacillariophyta	Bacillariophyta_X	Polar-centric-Mediophyceae	Ditylum	Ditylum_brightwellii	0	0	0	0	0	0	0	0	0	0	0	0	0	0	0	0	2	1	0	16	0	0	0	0	0	0	0	3	0	0	0	1	2	0	0	0	0	0	0	1	0	0	0	0
X808	Bacillariophyta	Bacillariophyta_X	Polar-centric-Mediophyceae	Ditylum	Ditylum_brightwellii	0	0	0	0	0	0	0	0	0	0	0	0	0	0	0	2	45	23	5	10	1	2	3	1	3	1	7	5	7	2	0	1	6	0	0	0	0	0	3	4	1	0	0	0
X922	Bacillariophyta	Bacillariophyta_X	Polar-centric-Mediophyceae	Ditylum	Ditylum_brightwellii	0	0	0	0	0	0	0	0	0	0	0	0	0	0	0	0	0	1	0	9	0	0	1	0	0	0	1	0	1	0	1	0	0	0	0	0	0	1	0	1	0	0	0	0
X956	Bacillariophyta	Bacillariophyta_X	Polar-centric-Mediophyceae	Ditylum	Ditylum_brightwellii	0	0	0	0	0	0	0	0	0	0	0	0	0	0	0	0	3	1	1	4	0	0	0	0	0	0	0	0	1	0	0	0	3	0	0	0	0	0	0	0	0	0	0	0
X3146	Bacillariophyta	Bacillariophyta_X	Raphid-pennate	Entomoneis	NA	0	0	0	0	0	0	0	0	0	0	0	0	0	0	0	0	0	0	0	0	0	0	0	0	0	0	0	0	0	0	0	0	0	0	0	0	0	0	0	0	0	0	0	0
X962	Bacillariophyta	Bacillariophyta_X	Polar-centric-Mediophyceae	Eunotogramma	Eunotogramma_laevis	2	0	5	4	3	0	1	0	0	5	1	0	0	0	0	0	0	0	0	0	0	1	1	0	0	0	1	3	0	0	0	1	7	9	3	0	0	0	0	0	0	0	0	0
X3329	Bacillariophyta	Bacillariophyta_X	Polar-centric-Mediophyceae	Extubocellulus	Extubocellulus_cribriger	0	0	0	0	0	0	0	2	0	1	0	0	0	0	0	0	0	0	1	0	0	0	0	0	0	0	0	0	0	0	0	0	0	0	0	0	0	0	0	0	0	0	0	0
X3272	Bacillariophyta	Bacillariophyta_X	Raphid-pennate	Frustulia	Frustulia_crassinervia/saxonica	0	0	0	0	0	0	1	0	0	0	1	0	0	0	0	0	0	0	0	0	0	0	0	0	0	0	0	0	0	0	0	0	0	1	0	0	0	0	0	0	0	0	0	0
X3302	Bacillariophyta	Bacillariophyta_X	Raphid-pennate	Frustulia	Frustulia_crassinervia/saxonica	0	0	0	0	0	0	0	0	0	0	0	0	0	0	0	0	0	0	0	0	0	0	0	0	0	0	0	0	0	0	0	0	0	0	0	0	0	0	0	0	0	0	0	0
X1258	Bacillariophyta	Bacillariophyta_X	Araphid-pennate	Grammatophora	Grammatophora_oceanica	0	0	0	0	0	0	0	0	0	0	0	0	0	0	0	0	0	0	1	0	0	0	0	0	0	0	0	0	0	0	1	0	7	1	0	0	0	0	0	0	0	0	0	0
X664	Bacillariophyta	Bacillariophyta_X	Araphid-pennate	Grammonema	Grammonema_striatula	0	0	0	0	0	0	4	0	0	0	3	0	0	0	0	0	0	0	0	0	3	0	0	0	0	0	0	1	7	0	2	0	0	1	0	0	0	0	0	0	0	0	1	0
X1178	Bacillariophyta	Bacillariophyta_X	Radial-centric-basal-Coscinodiscophyceae	Guinardia	Guinardia_delicatula	0	0	0	0	0	0	0	0	0	0	0	0	0	0	0	0	1	0	0	2	0	0	0	0	0	0	0	0	0	2	0	0	1	0	0	0	0	0	0	0	0	0	0	0
X1441	Bacillariophyta	Bacillariophyta_X	Radial-centric-basal-Coscinodiscophyceae	Guinardia	Guinardia_flaccida	0	0	0	0	0	0	0	0	0	0	0	0	0	0	0	1	2	2	0	0	0	1	0	1	0	0	0	0	0	1	0	0	1	0	0	0	0	0	0	0	0	0	0	0
X1540	Bacillariophyta	Bacillariophyta_X	Radial-centric-basal-Coscinodiscophyceae	Guinardia	Guinardia_flaccida	0	0	0	0	0	0	0	0	0	0	0	0	0	0	0	0	0	0	0	0	0	1	0	0	0	0	0	0	0	0	0	0	5	0	0	0	0	0	0	0	0	0	0	0
X247	Bacillariophyta	Bacillariophyta_X	Radial-centric-basal-Coscinodiscophyceae	Guinardia	Guinardia_delicatula	0	0	1	0	0	0	0	0	0	0	0	0	0	3	1	9	11	11	10	35	5	4	10	0	0	5	13	19	13	3	5	4	49	8	4	1	0	1	0	2	0	1	1	1
X2196	Bacillariophyta	Bacillariophyta_X	Polar-centric-Mediophyceae	Helicotheca	Helicotheca_sp.	0	0	0	0	0	0	0	0	0	0	0	0	0	0	0	0	0	0	0	1	0	0	0	0	0	0	0	0	0	0	0	0	0	0	0	0	0	0	0	0	0	0	0	0
X1250	Bacillariophyta	Bacillariophyta_X	Polar-centric-Mediophyceae	Lauderia	Lauderia_annulata	0	0	0	0	0	0	0	0	0	0	0	0	0	0	0	0	0	0	0	2	1	0	1	0	0	0	0	0	0	0	0	0	0	0	0	0	0	0	0	0	0	0	0	0
X389	Bacillariophyta	Bacillariophyta_X	Polar-centric-Mediophyceae	Lauderia	Lauderia_annulata	0	0	0	0	0	0	0	1	0	0	0	0	0	0	0	4	1	2	0	31	0	3	0	0	0	0	0	0	0	0	0	0	0	0	0	0	0	0	0	0	0	0	0	0
X2063	Bacillariophyta	Bacillariophyta_X	Radial-centric-basal-Coscinodiscophyceae	Leptocylindrus	Leptocylindrus_minimus	0	0	0	0	0	0	0	0	0	0	0	0	0	0	0	0	0	0	0	0	0	0	0	0	0	0	0	0	0	0	0	0	0	0	0	0	0	0	0	0	0	0	0	0
X3200	Bacillariophyta	Bacillariophyta_X	Radial-centric-basal-Coscinodiscophyceae	Leptocylindrus	Leptocylindrus_aporus	0	0	0	0	0	0	0	0	0	0	0	0	0	0	0	0	0	0	0	0	0	0	0	0	0	1	0	0	0	0	0	0	0	0	0	0	0	0	0	0	0	0	0	0
X716	Bacillariophyta	Bacillariophyta_X	Radial-centric-basal-Coscinodiscophyceae	Leptocylindrus	Leptocylindrus_minimus	0	0	2	0	0	0	0	0	0	0	0	0	0	0	0	0	0	0	0	0	0	0	0	0	0	0	0	0	0	0	0	0	0	0	0	0	0	1	0	1	0	2	0	0
X3072	Bacillariophyta	Bacillariophyta_X	Araphid-pennate	Licmophora	Licmophora_juergensii	0	0	0	0	0	0	0	0	0	0	0	0	0	0	0	0	0	0	0	0	0	0	0	0	0	0	0	0	0	0	0	0	0	0	0	0	0	0	0	0	0	0	0	0
X3692	Bacillariophyta	Bacillariophyta_X	Araphid-pennate	Licmophora	Licmophora_juergensii	0	0	0	0	0	0	0	0	0	0	0	0	0	0	0	0	0	0	0	0	0	0	0	0	0	0	0	0	0	0	0	0	0	0	0	0	0	0	0	0	0	0	0	0
X666	Bacillariophyta	Bacillariophyta_X	Araphid-pennate	Licmophora	Licmophora_juergensii	0	0	0	0	0	0	0	0	0	0	0	0	0	0	0	0	0	0	0	0	0	0	0	0	0	0	1	0	0	0	1	2	1	4	0	0	0	1	1	1	0	3	0	0
X1558	Bacillariophyta	Bacillariophyta_X	Araphid-pennate	Licmosphenia	Licmosphenia_peragallioides	0	0	0	0	0	0	0	0	0	0	0	0	0	0	0	0	0	0	0	0	0	0	1	0	0	0	0	0	0	0	0	0	0	0	0	0	0	0	1	0	0	0	0	0
X552	Bacillariophyta	Bacillariophyta_X	Polar-centric-Mediophyceae	Mediopyxis	Mediopyxis_helysia	0	0	0	0	0	0	0	0	0	0	0	0	0	0	0	0	0	0	0	9	0	0	0	0	0	2	0	0	2	0	0	6	28	0	0	0	0	0	0	0	0	0	0	0
X1562	Bacillariophyta	Bacillariophyta_X	Polar-centric-Mediophyceae	Minidiscus	Minidiscus_sp.	0	0	1	0	0	0	1	0	0	0	0	0	0	0	0	0	0	0	0	3	0	0	1	2	0	0	1	0	0	0	0	0	0	0	2	0	1	0	0	0	0	0	0	0
X1970	Bacillariophyta	Bacillariophyta_X	Polar-centric-Mediophyceae	Minidiscus	Minidiscus_comicus	3	2	2	3	0	0	3	3	1	4	0	0	3	0	0	3	3	1	1	0	1	1	0	0	0	0	1	0	0	0	0	0	0	1	0	0	1	2	0	1	1	0	0	0
X2107	Bacillariophyta	Bacillariophyta_X	Polar-centric-Mediophyceae	Minutocellus	Minutocellus_sp.	0	0	0	3	0	1	1	3	1	2	0	2	2	0	1	4	0	0	1	0	0	2	1	0	1	2	0	3	1	0	0	0	0	3	2	0	0	0	1	1	0	1	3	0
X540	Bacillariophyta	Bacillariophyta_X	Polar-centric-Mediophyceae	Minutocellus	Minutocellus_sp.	24	23	29	26	5	18	14	22	11	57	16	8	20	6	10	23	1	5	3	0	1	6	5	1	4	3	8	15	8	6	11	21	1	36	12	2	0	5	4	1	0	5	7	4
X1032	Bacillariophyta	Bacillariophyta_X	Polar-centric-Mediophyceae	NA	NA	0	1	0	0	0	0	1	0	3	0	2	0	0	0	0	0	0	0	1	0	0	0	0	0	0	0	0	0	0	0	0	0	1	0	0	0	0	0	0	0	0	0	0	0
X104	Bacillariophyta	Bacillariophyta_X	Raphid-pennate	NA	NA	241	206	283	471	283	549	625	303	296	674	369	105	334	74	249	399	86	94	53	8	24	115	65	16	35	13	30	39	25	15	13	7	2	13	6	2	1	0	0	0	0	0	4	0
X1055	Bacillariophyta	Bacillariophyta_X	Raphid-pennate	NA	NA	2	0	3	8	2	5	7	5	2	4	6	1	0	0	3	21	0	0	0	0	0	0	0	0	0	0	1	0	2	0	0	0	0	3	0	2	0	0	4	1	0	2	0	0
X1084	Bacillariophyta	Bacillariophyta_X	Raphid-pennate	NA	NA	0	2	2	0	1	5	5	4	3	11	5	1	5	0	11	8	1	2	2	4	0	9	2	1	0	0	1	2	4	1	0	1	0	8	3	1	0	0	0	0	0	0	0	0
X1193	Bacillariophyta	Bacillariophyta_X	Raphid-pennate	NA	NA	3	5	1	11	0	6	10	13	4	6	8	0	4	0	4	6	0	4	0	0	1	2	0	1	2	1	0	2	2	0	1	0	0	0	0	0	0	0	0	0	0	0	0	1
X123	Bacillariophyta	Bacillariophyta_X	Polar-centric-Mediophyceae	NA	NA	102	115	176	145	90	137	118	111	102	320	106	31	65	62	85	131	25	37	49	17	32	51	43	18	18	12	33	98	46	44	61	76	41	273	100	43	26	7	11	9	2	18	24	4
X1262	Bacillariophyta	Bacillariophyta_X	Polar-centric-Mediophyceae	NA	NA	2	1	2	1	4	1	1	2	3	2	2	0	0	0	1	0	0	0	1	0	0	1	0	0	0	0	0	1	2	1	0	0	0	1	0	1	0	0	0	0	0	0	0	0
X1332	Bacillariophyta	Bacillariophyta_X	Raphid-pennate	NA	NA	2	0	2	0	1	3	0	5	0	0	0	1	0	0	0	0	0	0	1	0	0	1	1	0	0	0	0	4	0	1	7	3	1	11	4	1	1	0	0	0	0	4	1	1
X1374	Bacillariophyta	Bacillariophyta_X	Raphid-pennate	NA	NA	0	0	0	0	0	0	0	0	0	0	0	0	0	0	0	0	0	0	0	0	0	0	0	0	0	0	0	0	0	0	0	0	0	0	0	0	1	0	0	0	0	0	0	0
X1446	Bacillariophyta	Bacillariophyta_X	Polar-centric-Mediophyceae	NA	NA	0	0	0	0	0	0	0	0	0	0	0	0	1	0	0	0	0	0	0	0	0	0	0	0	0	0	0	0	0	0	0	0	15	1	0	0	0	0	0	0	0	0	0	0
X1482	Bacillariophyta	Bacillariophyta_X	Polar-centric-Mediophyceae	NA	NA	0	0	0	0	0	0	0	0	0	0	0	0	0	0	0	0	0	1	0	0	0	0	0	0	0	0	0	0	0	0	0	0	1	0	0	0	0	0	0	0	0	0	0	0
X1585	Bacillariophyta	Bacillariophyta_X	Raphid-pennate	NA	NA	0	0	0	0	0	0	1	0	0	0	0	0	2	0	1	10	0	1	0	0	0	0	0	0	0	0	6	4	0	0	5	2	1	1	1	2	0	1	2	1	0	1	0	1
X1661	Bacillariophyta	Bacillariophyta_X	Raphid-pennate	NA	NA	0	0	0	0	0	0	0	0	2	4	0	0	0	0	1	0	0	0	0	0	1	0	0	0	0	0	0	0	0	0	2	0	0	1	0	0	0	0	1	1	0	0	0	0
X1662	Bacillariophyta	Bacillariophyta_X	Raphid-pennate	NA	NA	0	0	0	0	0	3	1	4	0	0	0	0	0	0	2	1	0	0	0	0	0	0	0	0	0	0	0	0	0	0	0	0	1	0	0	0	0	0	0	0	0	0	0	0
X1832	Bacillariophyta	Bacillariophyta_X	Polar-centric-Mediophyceae	NA	NA	2	2	0	4	0	0	10	0	1	2	3	0	0	2	0	0	1	0	0	0	0	1	0	0	0	0	1	0	2	0	2	0	0	12	7	0	0	0	2	0	0	0	0	0
X1837	Bacillariophyta	Bacillariophyta_X	Polar-centric-Mediophyceae	NA	NA	0	0	0	0	0	0	0	1	0	0	0	0	0	0	0	0	0	0	0	0	0	0	2	1	3	0	0	0	0	1	0	0	3	0	0	1	0	0	0	0	0	0	0	0
X1872	Bacillariophyta	Bacillariophyta_X	Araphid-pennate	NA	NA	0	0	0	0	0	0	1	0	0	0	0	0	0	0	0	0	0	0	0	0	0	0	0	0	0	0	0	0	0	0	0	0	0	0	0	0	0	0	0	0	0	0	0	0
X188	Bacillariophyta	Bacillariophyta_X	Radial-centric-basal-Coscinodiscophyceae	NA	NA	0	0	0	0	0	0	0	0	0	0	0	0	0	0	0	0	0	0	0	0	0	0	0	0	0	0	0	0	0	0	0	0	0	0	0	0	0	0	0	0	0	0	0	0
X1921	Bacillariophyta	Bacillariophyta_X	Raphid-pennate	NA	NA	0	0	0	0	0	0	0	0	0	0	0	0	0	0	0	0	0	0	0	0	0	0	0	0	0	0	0	0	0	0	0	0	0	0	0	0	0	0	0	0	0	0	0	0
X196	Bacillariophyta	Bacillariophyta_X	Raphid-pennate	NA	NA	2	3	13	56	26	52	153	68	123	171	64	15	73	31	56	31	12	13	20	4	1	13	14	4	6	6	12	15	25	6	2	13	13	35	19	4	0	1	0	1	0	0	1	0
X2007	Bacillariophyta	Bacillariophyta_X	Raphid-pennate	NA	NA	0	0	0	0	0	0	0	0	0	1	0	0	0	0	0	0	0	0	0	0	0	0	0	0	0	0	0	0	0	0	0	0	0	0	0	0	0	0	0	0	0	0	0	0
X2017	Bacillariophyta	Bacillariophyta_X	Polar-centric-Mediophyceae	NA	NA	0	0	0	0	0	0	0	0	0	0	0	0	0	0	0	0	0	0	0	0	0	0	0	0	0	0	0	0	0	0	0	0	0	0	0	0	0	0	0	0	0	0	0	0
X2111	Bacillariophyta	Bacillariophyta_X	Polar-centric-Mediophyceae	NA	NA	0	0	0	0	0	0	0	0	0	0	0	0	0	0	0	0	0	0	0	0	0	0	0	0	0	0	0	0	0	0	0	0	1	0	0	0	0	0	0	0	0	0	0	0
X213	Bacillariophyta	Bacillariophyta_X	Radial-centric-basal-Coscinodiscophyceae	NA	NA	0	0	0	0	0	0	0	0	0	0	0	0	0	0	0	0	0	0	0	0	0	0	0	0	0	0	0	0	0	0	0	0	0	0	0	0	0	0	1	0	6	0	0	0
X2132	Bacillariophyta	Bacillariophyta_X	Polar-centric-Mediophyceae	NA	NA	0	0	0	0	0	0	1	0	0	6	1	4	5	0	2	1	0	0	1	0	0	1	0	1	1	0	1	0	2	3	0	0	2	6	1	0	0	0	0	0	0	0	0	0
X2192	Bacillariophyta	Bacillariophyta_X	Raphid-pennate	NA	NA	0	0	0	0	0	0	1	2	1	8	1	0	0	0	0	0	0	0	0	0	0	0	0	0	0	0	0	0	0	0	0	0	0	3	0	0	0	0	0	0	0	0	0	0
X2267	Bacillariophyta	Bacillariophyta_X	Polar-centric-Mediophyceae	NA	NA	0	0	0	0	0	0	0	0	0	0	1	0	0	0	0	0	0	0	1	0	0	0	0	1	0	1	0	0	0	0	0	2	0	2	1	0	0	0	0	0	0	0	0	0
X2427	Bacillariophyta	Bacillariophyta_X	Raphid-pennate	NA	NA	0	0	1	2	2	0	0	0	0	2	0	0	1	0	1	0	2	0	0	1	0	1	0	1	1	0	2	1	0	0	1	1	0	4	1	1	2	0	2	1	1	0	0	0
X2846	Bacillariophyta	Bacillariophyta_X	Raphid-pennate	NA	NA	0	0	0	0	0	0	0	1	0	0	0	0	0	0	0	0	0	1	0	0	0	0	2	0	0	0	0	0	4	2	0	0	0	0	0	0	0	0	0	0	0	0	0	0
X2849	Bacillariophyta	Bacillariophyta_X	NA	NA	NA	0	0	0	0	0	0	0	0	0	0	0	0	0	0	0	0	0	0	0	0	0	0	0	0	0	0	0	0	0	0	0	0	0	0	0	0	0	0	2	0	0	0	0	0
X2957	Bacillariophyta	Bacillariophyta_X	Raphid-pennate	NA	NA	0	0	0	0	0	0	0	0	0	0	0	0	0	0	3	0	0	0	0	0	0	0	0	0	0	0	0	2	3	0	0	1	0	1	0	1	0	1	0	1	0	1	0	0
X3004	Bacillariophyta	Bacillariophyta_X	Radial-centric-basal-Coscinodiscophyceae	NA	NA	0	0	0	0	0	0	0	0	0	0	0	0	0	0	0	0	0	0	0	0	0	0	0	0	0	0	0	0	0	0	0	0	0	0	0	0	0	0	0	0	0	0	0	0
X3116	Bacillariophyta	Bacillariophyta_X	Polar-centric-Mediophyceae	NA	NA	0	0	0	0	0	0	0	0	0	0	0	0	0	0	0	0	0	0	0	0	0	0	0	0	0	0	0	0	0	0	0	0	0	0	0	0	0	0	0	0	0	0	0	0
X3189	Bacillariophyta	Bacillariophyta_X	Raphid-pennate	NA	NA	0	0	0	0	0	0	0	0	0	0	0	0	0	0	0	0	0	0	0	0	0	0	0	0	0	0	0	0	0	0	0	0	0	0	0	0	0	0	0	0	0	0	0	0
X3308	Bacillariophyta	Bacillariophyta_X	NA	NA	NA	0	0	0	0	0	0	0	0	0	0	0	0	0	0	0	0	0	0	0	0	0	0	0	0	0	0	0	0	0	0	0	0	0	0	0	0	0	0	0	0	0	0	0	0
X3328	Bacillariophyta	Bacillariophyta_X	Raphid-pennate	NA	NA	0	0	0	1	0	2	0	0	0	0	0	0	0	0	0	0	0	0	0	0	0	0	0	0	0	1	2	0	0	0	1	0	0	0	1	0	0	0	0	0	0	0	1	0
X3581	Bacillariophyta	Bacillariophyta_X	Polar-centric-Mediophyceae	NA	NA	0	0	0	0	0	0	0	0	0	0	0	0	0	0	0	0	0	0	0	0	0	0	0	0	0	0	0	0	0	0	0	0	0	0	0	0	0	0	0	0	0	0	0	0
X3624	Bacillariophyta	Bacillariophyta_X	Raphid-pennate	NA	NA	0	0	0	0	0	0	0	0	0	0	0	0	0	0	0	0	0	0	0	0	0	0	2	0	0	0	0	0	0	0	0	0	0	1	0	0	0	0	0	0	0	0	0	0
X3669	Bacillariophyta	Bacillariophyta_X	Radial-centric-basal-Coscinodiscophyceae	NA	NA	0	0	0	0	0	0	0	0	0	0	0	0	0	0	0	0	0	0	0	0	0	0	0	0	0	0	0	0	0	0	0	0	0	0	0	0	0	0	0	0	0	0	0	0
X3690	Bacillariophyta	Bacillariophyta_X	Raphid-pennate	NA	NA	0	0	0	0	0	0	0	0	0	0	0	0	0	0	0	0	0	0	0	0	0	0	0	0	0	0	0	0	0	0	0	0	0	0	0	0	0	0	0	0	0	0	0	0
X3761	Bacillariophyta	Bacillariophyta_X	Raphid-pennate	NA	NA	0	0	0	0	0	0	0	0	0	0	0	0	0	0	0	0	0	0	0	0	0	0	0	0	0	0	0	0	0	0	0	0	0	0	0	0	0	0	0	0	0	0	0	0
X3785	Bacillariophyta	Bacillariophyta_X	Polar-centric-Mediophyceae	NA	NA	0	0	0	0	0	0	0	0	0	0	0	0	0	0	0	0	0	0	0	0	0	0	0	0	0	0	0	0	0	0	0	0	0	0	0	0	0	0	0	0	0	0	0	0
X3788	Bacillariophyta	Bacillariophyta_X	Polar-centric-Mediophyceae	NA	NA	0	0	0	0	0	0	0	0	0	0	1	0	0	0	0	0	0	0	0	0	0	0	0	0	0	0	0	0	0	0	0	0	0	0	0	0	0	0	0	0	0	0	0	0
X3845	Bacillariophyta	Bacillariophyta_X	Raphid-pennate	NA	NA	0	0	0	0	0	0	3	0	0	0	0	0	1	0	0	0	0	1	0	0	0	0	0	0	0	0	0	0	0	0	0	0	0	0	0	0	1	0	0	0	0	1	0	0
X3973	Bacillariophyta	Bacillariophyta_X	Polar-centric-Mediophyceae	NA	NA	0	0	0	0	0	0	0	0	0	0	0	0	0	0	0	0	0	0	0	0	0	0	0	0	0	0	0	0	0	0	0	0	1	0	0	0	0	0	0	0	0	0	0	0
X3976	Bacillariophyta	Bacillariophyta_X	Polar-centric-Mediophyceae	NA	NA	0	0	0	0	0	0	0	0	0	0	0	0	0	0	0	0	0	0	0	0	0	0	0	0	0	1	0	0	0	0	0	0	1	0	0	0	0	0	0	0	0	0	0	0
X4012	Bacillariophyta	Bacillariophyta_X	Raphid-pennate	NA	NA	0	0	0	0	0	0	0	0	0	0	0	0	0	0	0	0	0	0	0	0	0	0	0	0	0	0	0	0	0	0	0	0	0	0	0	0	0	0	0	0	0	0	0	0
X4212	Bacillariophyta	Bacillariophyta_X	Polar-centric-Mediophyceae	NA	NA	0	0	0	0	0	0	0	0	0	0	0	0	0	0	0	0	0	0	0	0	0	0	0	0	0	0	0	0	0	0	0	0	0	0	0	0	0	0	0	0	0	0	0	0
X4227	Bacillariophyta	Bacillariophyta_X	Raphid-pennate	NA	NA	0	0	0	0	0	0	0	0	0	0	0	0	0	0	0	0	0	0	0	0	0	0	0	0	0	0	0	0	0	0	0	0	0	0	0	0	0	0	0	0	0	0	0	0
X4293	Bacillariophyta	Bacillariophyta_X	Raphid-pennate	NA	NA	0	0	0	0	0	0	0	0	0	0	0	0	0	0	0	0	0	0	0	0	0	0	0	0	0	0	0	0	0	0	0	0	0	0	0	0	0	0	0	0	0	0	0	0
X4296	Bacillariophyta	Bacillariophyta_X	Polar-centric-Mediophyceae	NA	NA	0	0	0	0	0	0	0	0	0	0	0	0	0	0	0	0	0	0	0	0	0	0	0	0	0	0	0	0	0	0	0	0	0	0	0	0	0	0	0	0	0	0	0	0
X4398	Bacillariophyta	Bacillariophyta_X	NA	NA	NA	0	0	0	0	0	0	0	0	0	0	0	0	0	0	0	0	0	0	0	0	0	0	0	0	0	0	0	0	0	0	0	0	0	0	0	0	0	0	0	0	0	0	0	0
X4442	Bacillariophyta	Bacillariophyta_X	Polar-centric-Mediophyceae	NA	NA	0	0	0	0	0	0	0	0	0	0	0	0	0	0	0	0	0	0	0	0	0	0	0	0	0	0	0	0	0	0	0	0	0	0	0	0	0	0	0	0	0	0	0	0
X4460	Bacillariophyta	Bacillariophyta_X	Polar-centric-Mediophyceae	NA	NA	0	0	0	0	0	0	0	0	0	0	0	0	0	0	0	0	0	0	0	0	0	0	0	0	0	0	0	0	0	0	0	0	0	0	0	0	0	0	0	0	0	0	0	0
X487	Bacillariophyta	Bacillariophyta_X	Polar-centric-Mediophyceae	NA	NA	1	4	3	4	3	5	6	3	2	4	4	1	0	3	4	5	2	2	0	2	1	10	7	2	5	2	0	1	4	5	6	12	27	31	11	15	3	3	4	5	0	0	3	1
X564	Bacillariophyta	Bacillariophyta_X	Raphid-pennate	NA	NA	20	8	14	24	16	9	5	7	8	17	5	2	13	3	8	6	2	3	2	0	2	10	10	3	7	4	8	12	14	10	19	43	4	60	31	19	23	8	17	5	4	5	1	3
X630	Bacillariophyta	Bacillariophyta_X	Raphid-pennate	NA	NA	0	2	3	4	2	7	6	3	5	17	9	4	11	4	15	9	2	6	15	7	3	16	15	1	3	3	2	10	2	1	2	4	2	11	3	0	0	0	0	0	0	0	0	0
X639	Bacillariophyta	Bacillariophyta_X	Radial-centric-basal-Coscinodiscophyceae	NA	NA	0	0	0	0	0	0	0	0	0	0	0	0	0	0	0	0	0	0	0	2	0	0	0	0	0	0	0	0	0	0	0	0	3	0	0	0	0	0	0	0	0	0	0	0
X640	Bacillariophyta	Bacillariophyta_X	Araphid-pennate	NA	NA	10	8	9	8	0	6	11	3	11	15	7	1	2	1	6	8	0	4	3	0	0	2	3	1	2	2	0	5	7	1	3	2	0	10	8	0	0	0	0	1	0	1	1	1
X7	Bacillariophyta	Bacillariophyta_X	Polar-centric-Mediophyceae	NA	NA	405	362	638	1728	560	1664	2019	1301	973	2401	1209	474	1156	547	1608	3595	1365	2123	1039	1299	302	2536	1250	1328	1477	673	1463	1496	1215	2056	2157	5127	4352	10663	4472	2433	2144	1240	1568	1181	166	506	548	273
X75	Bacillariophyta	Bacillariophyta_X	Polar-centric-Mediophyceae	NA	NA	0	1	0	1	1	1	0	0	0	0	0	0	0	0	0	0	0	0	0	7	0	0	0	0	0	0	0	0	0	0	0	0	3	0	0	0	0	0	0	0	0	0	0	0
X754	Bacillariophyta	Bacillariophyta_X	Radial-centric-basal-Coscinodiscophyceae	NA	NA	0	1	0	0	0	0	0	0	0	0	0	0	0	0	1	0	0	0	0	0	0	0	0	0	0	1	0	0	5	0	0	0	0	0	0	0	0	0	0	0	0	0	0	0
X102	Bacillariophyta	Bacillariophyta_X	Raphid-pennate	Navicula	NA	78	123	71	369	47	211	245	315	340	873	244	85	182	54	160	177	75	109	37	23	14	144	66	60	56	158	120	75	196	144	116	162	17	274	103	90	31	41	77	108	41	137	41	30
X1171	Bacillariophyta	Bacillariophyta_X	Raphid-pennate	Navicula	NA	0	0	0	0	0	0	0	0	0	0	0	0	0	0	0	0	0	0	0	0	0	0	0	0	0	0	0	0	0	0	0	0	0	0	0	0	0	0	0	0	0	0	0	0
X1774	Bacillariophyta	Bacillariophyta_X	Raphid-pennate	Navicula	Navicula_perminuta	1	2	0	0	0	0	0	0	1	3	1	0	0	0	3	0	0	1	0	0	0	0	1	0	0	4	0	0	3	0	0	0	0	1	0	0	0	0	0	0	0	1	0	0
X1842	Bacillariophyta	Bacillariophyta_X	Raphid-pennate	Navicula	Navicula_phyllepta	0	0	0	0	0	0	0	1	0	0	0	0	0	0	1	0	0	0	0	0	0	0	0	0	0	0	0	0	2	0	0	0	0	0	0	1	0	0	0	0	0	1	0	0
X1864	Bacillariophyta	Bacillariophyta_X	Raphid-pennate	Navicula	Navicula_phyllepta	0	0	0	0	0	0	0	0	0	0	0	0	0	0	0	0	0	0	0	0	0	0	2	0	0	1	0	0	0	0	3	2	0	1	0	0	0	0	0	0	0	0	1	1
X1981	Bacillariophyta	Bacillariophyta_X	Raphid-pennate	Navicula	Navicula_perminuta	0	0	0	0	0	0	0	0	0	0	0	0	0	0	0	1	0	1	0	0	0	0	3	0	0	6	0	0	2	0	0	0	0	1	0	0	0	0	2	0	0	2	1	0
X2117	Bacillariophyta	Bacillariophyta_X	Raphid-pennate	Navicula	NA	0	0	0	0	0	0	0	0	0	0	1	0	0	0	0	0	0	0	0	0	0	0	0	0	0	0	0	0	0	0	0	0	0	0	0	0	0	0	0	0	0	0	0	0
X2202	Bacillariophyta	Bacillariophyta_X	Raphid-pennate	Navicula	Navicula_perminuta	0	0	0	0	0	0	0	0	0	0	0	0	0	0	0	0	0	0	1	0	0	0	1	0	0	2	0	0	0	2	1	1	0	1	0	0	0	0	2	0	0	3	0	0
X2317	Bacillariophyta	Bacillariophyta_X	Raphid-pennate	Navicula	NA	0	0	0	0	0	0	0	0	0	0	0	0	0	0	0	0	0	0	0	0	0	0	0	0	0	0	0	0	1	0	0	0	0	0	0	0	0	0	0	0	0	0	0	0
X2329	Bacillariophyta	Bacillariophyta_X	Raphid-pennate	Navicula	NA	0	0	0	0	0	0	0	0	0	0	0	0	0	0	0	0	0	0	0	0	0	0	0	0	0	0	0	0	0	0	0	0	0	0	0	0	0	0	0	0	0	1	0	0
X305	Bacillariophyta	Bacillariophyta_X	Raphid-pennate	Navicula	NA	0	0	1	5	1	2	12	0	1	5	1	1	1	0	7	7	7	14	3	0	0	0	5	1	0	4	4	1	17	5	10	0	2	12	2	1	1	1	8	3	0	10	1	1
X306	Bacillariophyta	Bacillariophyta_X	Raphid-pennate	Navicula	NA	0	0	0	3	0	0	3	0	0	0	0	1	0	0	0	1	0	0	0	0	0	0	1	0	0	0	0	0	0	1	0	0	0	0	0	0	0	0	1	0	0	0	0	0
X409	Bacillariophyta	Bacillariophyta_X	Raphid-pennate	Navicula	Navicula_perminuta	2	0	0	0	0	1	0	0	1	0	1	0	1	0	4	3	0	0	1	1	0	0	78	2	1	98	3	13	13	16	14	4	0	27	4	1	2	0	11	3	4	29	5	1
X4387	Bacillariophyta	Bacillariophyta_X	Raphid-pennate	Navicula	Navicula_perminuta	0	0	0	0	0	0	0	0	0	0	0	0	0	0	0	0	0	0	0	0	0	0	0	0	0	0	0	0	0	0	0	0	0	0	0	0	0	0	0	0	0	0	0	0
X821	Bacillariophyta	Bacillariophyta_X	Raphid-pennate	Navicula	Navicula_phyllepta	1	0	0	1	0	2	0	3	0	0	0	0	1	0	1	4	0	3	0	0	0	0	1	0	2	3	0	0	2	3	0	0	0	1	0	1	0	1	0	0	0	1	0	1
X1617	Bacillariophyta	Bacillariophyta_X	Raphid-pennate	Nitzschia	Nitzschia_palea	0	0	0	0	0	0	0	0	0	0	0	0	0	0	0	0	0	0	0	0	0	0	1	0	0	0	1	0	0	0	1	0	0	0	0	0	0	0	0	0	0	1	0	0
X1989	Bacillariophyta	Bacillariophyta_X	Raphid-pennate	Nitzschia	Nitzschia_palea	0	0	0	0	0	0	1	0	1	1	1	1	0	0	1	0	0	0	0	0	0	0	0	0	1	0	0	0	0	0	0	0	1	0	0	0	0	0	0	0	0	0	0	0
X2109	Bacillariophyta	Bacillariophyta_X	Raphid-pennate	Nitzschia	NA	0	0	1	1	0	3	2	1	1	1	1	0	0	0	2	4	0	1	0	1	0	0	1	0	0	0	1	1	0	0	0	0	0	0	0	0	0	0	0	0	0	0	0	0
X2431	Bacillariophyta	Bacillariophyta_X	Raphid-pennate	Nitzschia	NA	0	0	2	0	0	0	0	0	0	0	0	0	0	0	0	0	0	0	0	0	0	0	0	0	0	0	0	0	0	2	1	0	0	0	0	0	0	0	0	0	0	0	0	0
X715	Bacillariophyta	Bacillariophyta_X	Raphid-pennate	Nitzschia	Nitzschia_linearis	0	0	2	2	0	2	0	2	2	3	3	0	1	0	2	6	0	0	0	7	0	1	0	0	0	1	0	0	3	1	0	0	0	2	1	0	0	0	0	0	0	0	0	1
X390	Bacillariophyta	Bacillariophyta_X	Polar-centric-Mediophyceae	Odontella	Odontella_sinensis	0	0	0	0	0	0	0	0	0	0	0	0	1	0	1	6	0	2	0	8	9	2	2	1	0	3	1	6	5	2	3	3	32	2	0	0	0	0	1	1	0	0	0	0
X628	Bacillariophyta	Bacillariophyta_X	Polar-centric-Mediophyceae	Odontella	Odontella_rhomboides	0	0	2	0	0	0	0	0	0	4	0	0	0	0	0	0	0	0	0	2	0	0	0	0	0	0	0	0	0	0	0	0	3	0	0	0	0	0	0	0	0	0	0	0
X668	Bacillariophyta	Bacillariophyta_X	Polar-centric-Mediophyceae	Odontella	Odontella_aurita	0	0	4	0	0	0	6	0	0	0	0	0	0	0	0	0	0	0	0	0	0	0	0	0	0	0	0	0	0	0	0	0	3	0	0	0	0	0	0	0	0	0	0	0
X791	Bacillariophyta	Bacillariophyta_X	Polar-centric-Mediophyceae	Odontella	Odontella_aurita	0	0	0	0	0	0	0	0	0	0	0	0	0	0	0	0	0	0	0	0	0	0	0	0	0	0	0	0	0	0	0	0	0	0	0	0	0	0	0	0	0	0	0	0
X869	Bacillariophyta	Bacillariophyta_X	Polar-centric-Mediophyceae	Odontella	Odontella_sp.	0	0	1	0	0	0	29	0	0	0	0	0	0	0	0	0	0	5	2	3	0	0	0	0	0	0	0	0	0	0	0	0	0	0	0	0	0	0	0	0	0	0	0	0
X269	Bacillariophyta	Bacillariophyta_X	Polar-centric-Mediophyceae	Papiliocellulus	Papiliocellulus_elegans	66	42	50	85	7	55	96	44	61	152	70	19	85	4	53	110	28	32	19	2	1	33	23	20	24	16	19	29	22	27	23	51	2	48	18	9	19	2	6	8	1	5	6	3
X3261	Bacillariophyta	Bacillariophyta_X	Polar-centric-Mediophyceae	Papiliocellulus	Papiliocellulus_elegans	1	0	0	2	0	0	0	1	0	0	1	0	0	0	0	3	0	0	0	0	0	0	0	0	0	0	0	3	0	0	0	0	0	1	0	1	0	0	0	0	0	0	0	0
X3794	Bacillariophyta	Bacillariophyta_X	Polar-centric-Mediophyceae	Papiliocellulus	Papiliocellulus_elegans	0	0	0	0	0	0	0	5	0	0	0	0	0	0	0	0	0	0	0	0	0	0	0	0	0	0	0	0	0	0	0	0	0	0	0	0	0	0	0	0	0	0	0	0
X287	Bacillariophyta	Bacillariophyta_X	Radial-centric-basal-Coscinodiscophyceae	Paralia	Paralia_sulcata	0	1	13	1	0	0	0	0	0	0	0	0	0	0	0	0	0	0	0	0	0	0	1	0	0	0	0	0	0	0	0	0	4	0	0	0	0	0	0	0	0	0	0	0
X4421	Bacillariophyta	Bacillariophyta_X	Radial-centric-basal-Coscinodiscophyceae	Paralia	Paralia_sulcata	0	0	0	0	0	0	0	0	0	0	0	0	0	0	0	0	0	0	0	0	0	0	0	0	0	0	0	0	0	0	0	0	0	0	0	0	0	0	0	0	0	0	0	0
X1126	Bacillariophyta	Bacillariophyta_X	Raphid-pennate	Phaeodactylum	Phaeodactylum_tricornutum	12	6	0	0	0	0	17	0	0	1	0	0	0	0	0	0	0	0	0	0	2	0	4	5	0	3	0	0	9	0	0	0	0	0	0	0	0	0	1	0	0	0	0	0
X1319	Bacillariophyta	Bacillariophyta_X	Polar-centric-Mediophyceae	Pierrecomperia	Pierrecomperia_catenuloides	2	3	6	4	0	4	3	4	4	2	1	2	0	0	3	1	0	0	1	0	1	2	2	1	2	4	0	2	4	0	0	7	0	3	0	1	1	0	1	0	0	0	0	0
X1248	Bacillariophyta	Bacillariophyta_X	Raphid-pennate	Pleurosigma	Pleurosigma_sp.	1	0	0	0	0	0	0	0	0	0	0	0	0	0	0	0	0	0	0	0	0	0	0	0	0	0	0	0	0	0	0	0	0	0	0	0	0	0	0	0	0	0	0	0
X2736	Bacillariophyta	Bacillariophyta_X	Raphid-pennate	Pleurosigma	Pleurosigma_sp.	0	0	0	0	0	0	1	0	0	0	0	0	0	0	0	0	0	0	0	0	0	0	1	0	0	0	0	0	0	0	0	0	0	0	0	0	0	0	0	0	0	0	0	0
X3138	Bacillariophyta	Bacillariophyta_X	Raphid-pennate	Pleurosigma	Pleurosigma_sp.	0	1	0	0	0	0	0	0	0	0	0	0	0	0	0	0	0	0	0	0	0	0	0	0	0	0	0	0	0	0	0	0	0	0	0	0	0	0	0	0	0	0	0	0
X3787	Bacillariophyta	Bacillariophyta_X	Raphid-pennate	Pleurosigma	NA	0	0	0	0	0	0	0	0	0	0	0	0	0	0	0	0	0	0	0	0	0	0	0	0	0	0	0	0	0	0	0	0	0	0	0	0	0	0	0	0	0	0	0	0
X2322	Bacillariophyta	Bacillariophyta_X	Polar-centric-Mediophyceae	Porosira	Porosira_glacialis	0	0	0	0	0	0	0	0	0	0	0	0	0	0	0	0	0	0	0	0	0	0	0	0	0	0	0	0	0	0	0	0	0	0	0	0	0	0	0	0	0	0	0	0
X2794	Bacillariophyta	Bacillariophyta_X	Radial-centric-basal-Coscinodiscophyceae	Proboscia	Proboscia_alata	0	0	0	0	0	0	0	0	0	0	0	0	0	0	0	0	0	0	0	0	0	0	0	0	0	0	0	0	0	0	0	0	0	0	0	0	0	0	0	0	0	0	0	0
X846	Bacillariophyta	Bacillariophyta_X	Raphid-pennate	Psammodictyon	NA	1	1	0	1	0	0	0	1	1	0	0	0	0	0	0	0	2	0	0	1	0	0	0	0	0	0	1	0	0	0	0	0	2	0	0	0	0	0	0	0	0	0	0	0
X2882	Bacillariophyta	Bacillariophyta_X	Araphid-pennate	Psammoneis	Psammoneis_japonica	0	0	0	0	0	0	0	0	0	0	0	0	0	1	1	0	0	0	0	0	0	0	1	0	0	0	0	0	0	1	0	0	0	0	0	0	0	0	0	1	0	0	0	0
X119	Bacillariophyta	Bacillariophyta_X	Raphid-pennate	Pseudo-nitzschia	Pseudo-nitzschia_pungens	0	0	0	0	0	0	0	0	0	0	0	0	0	0	0	1	2	2	0	6	0	2	0	0	2	4	5	3	21	3	3	5	7	1	1	9	0	4	14	18	30	38	47	48
X1214	Bacillariophyta	Bacillariophyta_X	Raphid-pennate	Pseudo-nitzschia	Pseudo-nitzschia_delicatissima	0	0	0	0	0	0	0	0	0	0	0	0	0	0	0	1	0	4	0	0	1	2	0	0	0	0	2	0	1	0	4	1	1	0	0	0	0	0	0	0	17	1	4	1
X2791	Bacillariophyta	Bacillariophyta_X	Raphid-pennate	Pseudo-nitzschia	Pseudo-nitzschia_pungens	0	0	0	0	0	0	0	0	0	0	0	0	0	0	0	0	0	0	0	0	0	0	0	0	0	0	0	0	0	0	0	0	0	0	0	0	0	0	0	0	1	0	0	0
X93	Bacillariophyta	Bacillariophyta_X	Raphid-pennate	Pseudo-nitzschia	Pseudo-nitzschia_delicatissima	0	2	13	9	6	3	5	6	3	8	5	3	5	5	16	145	380	305	65	28	47	155	99	88	180	205	711	650	714	541	468	235	32	444	200	204	29	98	98	310	330	222	177	103
X656	Bacillariophyta	Bacillariophyta_X	Radial-centric-basal-Coscinodiscophyceae	Radial-centric-basal-Coscinodiscophyceae_X	Radial-centric-basal-Coscinodiscophyceae_X_sp.	0	0	0	0	0	0	0	0	0	0	0	0	0	0	0	0	0	0	0	1	0	0	0	0	0	0	0	0	0	0	0	0	0	0	0	0	0	0	0	0	0	0	0	0
X2850	Bacillariophyta	Bacillariophyta_X	Raphid-pennate	Raphid-pennate_X	Raphid-pennate_X_sp.	0	0	0	0	0	0	0	0	0	0	0	0	0	0	0	0	0	0	0	0	0	0	0	0	0	0	0	3	0	1	0	0	0	0	0	0	0	0	2	0	0	0	0	0
X2131	Bacillariophyta	Bacillariophyta_X	Araphid-pennate	Rhaphoneis	Rhaphoneis_amphiceros	0	0	0	0	0	0	0	0	0	0	0	0	0	0	0	0	0	0	0	0	0	0	0	0	0	0	0	0	0	0	0	0	0	0	0	0	0	0	0	0	0	0	0	0
X3566	Bacillariophyta	Bacillariophyta_X	Araphid-pennate	Rhaphoneis	NA	0	0	0	0	0	0	0	0	0	0	0	0	0	0	0	0	0	0	0	0	0	0	0	0	0	0	0	0	0	0	0	0	0	0	0	0	0	0	0	0	0	0	0	0
X1121	Bacillariophyta	Bacillariophyta_X	Radial-centric-basal-Coscinodiscophyceae	Rhizosolenia	Rhizosolenia_similoides	0	0	0	0	0	4	0	0	0	0	1	0	1	0	0	4	3	5	2	0	0	5	1	0	0	0	2	2	6	3	2	0	0	1	0	5	0	0	1	0	0	0	0	0
X133	Bacillariophyta	Bacillariophyta_X	Radial-centric-basal-Coscinodiscophyceae	Rhizosolenia	Rhizosolenia_setigera	0	0	0	1	1	0	15	1	0	0	0	0	1	0	0	0	1	1	4	0	0	0	0	1	1	0	4	8	9	8	11	16	11	16	6	14	0	0	0	0	0	0	0	0
X347	Bacillariophyta	Bacillariophyta_X	Radial-centric-basal-Coscinodiscophyceae	Rhizosolenia	Rhizosolenia_imbricata	0	0	0	0	0	0	0	0	0	0	0	1	0	2	0	5	6	4	2	23	0	8	0	0	1	4	11	7	7	3	0	3	20	0	5	1	0	0	0	1	1	1	0	1
X3522	Bacillariophyta	Bacillariophyta_X	Radial-centric-basal-Coscinodiscophyceae	Rhizosolenia	NA	0	0	0	0	0	0	0	0	0	0	0	0	0	0	0	0	0	0	0	0	0	0	0	0	0	0	0	0	0	0	0	0	0	0	0	0	0	0	0	0	0	0	0	0
X3829	Bacillariophyta	Bacillariophyta_X	Radial-centric-basal-Coscinodiscophyceae	Rhizosolenia	Rhizosolenia_setigera	0	0	0	0	0	0	0	0	0	0	0	0	0	0	0	0	0	0	0	0	0	0	0	0	0	0	0	0	0	0	0	0	0	0	0	0	0	0	0	0	0	0	0	0
X3947	Bacillariophyta	Bacillariophyta_X	Radial-centric-basal-Coscinodiscophyceae	Rhizosolenia	Rhizosolenia_setigera	0	0	0	0	0	0	0	0	0	0	0	0	0	0	0	0	0	0	0	0	0	0	0	0	0	0	0	0	0	0	0	0	0	0	0	0	0	0	0	0	0	0	0	0
X2754	Bacillariophyta	Bacillariophyta_X	Raphid-pennate	Sellaphora	Sellaphora_minima	0	0	0	0	0	0	0	0	0	0	0	0	0	0	0	0	0	0	0	0	0	0	0	0	0	0	0	0	0	0	0	0	0	0	0	0	0	0	0	0	0	1	0	0
X589	Bacillariophyta	Bacillariophyta_X	Raphid-pennate	Sellaphora	Sellaphora_pupula	0	0	0	0	0	0	0	0	0	0	0	0	0	0	0	0	0	0	0	1	0	0	1	0	0	0	0	0	0	0	0	0	0	1	0	0	0	0	0	0	0	0	0	0
X110	Bacillariophyta	Bacillariophyta_X	Polar-centric-Mediophyceae	Skeletonema	Skeletonema_marinoi	5	3	17	85	15	56	74	48	96	133	69	30	91	35	117	149	40	111	41	48	10	150	73	48	45	27	84	27	60	79	112	165	237	822	441	236	82	42	112	45	11	36	27	35
X2588	Bacillariophyta	Bacillariophyta_X	Raphid-pennate	Stauroneis	NA	0	0	0	0	0	0	0	0	0	1	0	0	0	0	0	0	0	0	0	0	0	0	0	0	0	0	1	0	1	0	0	0	0	1	0	0	0	1	0	0	0	1	0	0
X651	Bacillariophyta	Bacillariophyta_X	Araphid-pennate	Staurosirella_Nanofrustulum	Staurosirella_Nanofrustulum_sp.	1	6	6	8	1	9	5	4	2	6	5	0	3	1	4	7	1	1	3	1	0	4	2	0	1	2	2	13	7	8	1	0	1	11	3	1	0	1	0	0	0	1	0	3
X3434	Bacillariophyta	Bacillariophyta_X	Polar-centric-Mediophyceae	Stephanodiscus	Stephanodiscus_sp.	0	0	0	2	0	1	0	0	0	0	0	1	0	0	0	0	0	2	0	0	0	0	0	0	0	0	0	0	0	0	0	0	1	0	0	0	1	0	0	0	0	0	0	0
X830	Bacillariophyta	Bacillariophyta_X	Polar-centric-Mediophyceae	Stephanodiscus	Stephanodiscus_sp.	3	2	1	10	5	11	18	6	1	16	2	2	2	1	4	5	2	5	1	2	0	10	5	5	7	0	6	0	4	5	7	8	6	34	9	10	0	0	0	0	0	0	0	3
X2412	Bacillariophyta	Bacillariophyta_X	Radial-centric-basal-Coscinodiscophyceae	Stephanopyxis	NA	0	0	0	0	0	0	0	0	0	0	0	0	0	0	0	0	0	0	0	0	0	0	0	0	0	0	1	0	0	0	0	0	1	0	0	0	0	0	0	0	0	0	0	0
X1934	Bacillariophyta	Bacillariophyta_X	Araphid-pennate	Tabularia	Tabularia_laevis	0	0	0	0	0	0	0	0	0	0	0	0	0	0	0	0	0	0	0	0	0	0	0	0	0	0	0	0	0	0	0	0	0	0	0	0	0	0	0	0	0	1	0	0
X1991	Bacillariophyta	Bacillariophyta_X	Araphid-pennate	Tabularia	Tabularia_tabulata	0	0	0	0	0	0	0	0	0	0	0	0	0	0	0	0	0	0	0	0	0	0	0	0	0	0	0	0	0	0	0	0	0	0	0	0	0	0	0	0	0	0	0	0
X2059	Bacillariophyta	Bacillariophyta_X	Araphid-pennate	Tabularia	Tabularia_sp.	0	0	0	0	0	1	1	0	0	0	0	0	0	0	0	0	0	0	0	0	0	0	0	0	0	0	0	0	0	0	0	0	0	0	0	0	0	0	0	0	0	0	0	0
X215	Bacillariophyta	Bacillariophyta_X	Araphid-pennate	Tabularia	Tabularia_sp.	2	0	1	2	0	1	1	3	0	6	2	0	1	0	5	12	1	9	1	1	1	3	15	2	2	1	9	17	59	18	17	17	3	18	14	4	3	0	11	2	3	73	15	20
X2474	Bacillariophyta	Bacillariophyta_X	Araphid-pennate	Tabularia	Tabularia_laevis	0	0	0	0	0	0	0	0	0	0	0	0	0	0	0	0	0	0	0	0	0	0	0	0	0	0	0	0	0	0	0	0	0	0	0	0	0	0	0	0	0	0	0	0
X3520	Bacillariophyta	Bacillariophyta_X	Araphid-pennate	Tabularia	Tabularia_laevis	0	0	0	0	0	0	0	0	0	0	0	0	0	0	0	0	0	0	0	0	0	0	0	0	0	0	0	0	0	1	0	0	0	0	0	0	0	0	0	0	0	0	0	1
X4035	Bacillariophyta	Bacillariophyta_X	Raphid-pennate	Tenuicylindrus	Tenuicylindrus_belgicus	0	0	0	0	0	0	0	0	0	0	0	0	0	0	0	0	0	0	0	0	0	0	0	0	0	0	0	0	0	0	0	0	0	0	0	0	0	0	0	0	0	0	0	0
X1349	Bacillariophyta	Bacillariophyta_X	Araphid-pennate	Thalassionema	Thalassionema_frauenfeldii	0	0	0	0	0	0	0	1	0	0	0	0	0	0	0	0	0	0	0	0	0	0	0	0	0	0	0	0	0	0	0	0	0	0	0	0	0	0	0	0	0	0	1	0
X1899	Bacillariophyta	Bacillariophyta_X	Araphid-pennate	Thalassionema	Thalassionema_sp.	0	0	0	0	0	0	0	0	1	0	1	0	0	0	0	1	0	0	0	0	0	0	0	1	1	0	0	0	0	0	0	0	1	0	0	0	0	0	1	0	0	0	0	0
X353	Bacillariophyta	Bacillariophyta_X	Araphid-pennate	Thalassionema	Thalassionema_frauenfeldii	5	1	8	15	0	4	14	3	3	13	2	0	2	0	1	13	2	1	0	4	0	5	2	1	1	0	0	0	2	5	3	2	14	11	5	6	1	1	1	2	0	1	0	0
X103	Bacillariophyta	Bacillariophyta_X	Polar-centric-Mediophyceae	Thalassiosira	Thalassiosira_rotula	1	0	0	0	0	0	0	0	0	0	0	0	0	0	0	2	4	6	3	418	0	3	18	6	1	7	3	0	1	1	0	1	68	1	0	1	0	0	0	0	0	0	0	0
X1151	Bacillariophyta	Bacillariophyta_X	Polar-centric-Mediophyceae	Thalassiosira	Thalassiosira_minima	0	0	0	5	2	2	5	5	7	2	7	2	4	4	4	8	2	4	3	3	0	9	3	0	0	1	1	5	2	2	0	0	1	1	3	1	0	1	0	0	0	0	0	0
X1176	Bacillariophyta	Bacillariophyta_X	Polar-centric-Mediophyceae	Thalassiosira	Thalassiosira_minima	0	0	2	4	1	5	3	5	2	4	3	0	6	1	5	8	0	3	2	2	0	11	2	0	1	1	0	0	2	0	0	4	0	1	2	0	0	0	0	0	0	0	0	0
X1271	Bacillariophyta	Bacillariophyta_X	Polar-centric-Mediophyceae	Thalassiosira	Thalassiosira_minuscula	0	0	0	1	0	1	0	1	0	0	0	0	0	0	0	0	0	0	0	3	0	0	1	0	0	0	0	0	0	0	0	6	0	2	0	0	0	0	0	0	0	0	0	0
X1450	Bacillariophyta	Bacillariophyta_X	Polar-centric-Mediophyceae	Thalassiosira	NA	0	1	3	2	1	1	0	0	1	5	0	0	1	1	0	0	0	0	0	0	0	1	3	0	0	0	0	3	0	3	0	0	0	13	1	2	0	0	0	0	0	0	0	0
X1561	Bacillariophyta	Bacillariophyta_X	Polar-centric-Mediophyceae	Thalassiosira	Thalassiosira_guillardii	0	1	0	0	0	0	0	1	1	0	0	2	0	0	0	0	0	0	3	0	3	2	0	2	1	0	0	0	0	0	0	3	7	16	6	0	5	1	2	0	0	0	0	0
X1563	Bacillariophyta	Bacillariophyta_X	Polar-centric-Mediophyceae	Thalassiosira	NA	0	0	0	0	0	0	0	0	0	0	0	0	0	0	0	0	0	0	0	0	0	0	0	0	0	0	0	0	0	0	0	3	2	0	0	0	0	0	0	0	0	0	0	0
X1571	Bacillariophyta	Bacillariophyta_X	Polar-centric-Mediophyceae	Thalassiosira	NA	0	2	2	0	2	1	1	4	3	3	1	0	0	1	1	0	0	0	2	1	0	0	1	0	0	0	0	0	0	0	0	0	3	0	0	0	0	0	0	0	0	0	0	0
X172	Bacillariophyta	Bacillariophyta_X	Polar-centric-Mediophyceae	Thalassiosira	Thalassiosira_profunda	38	32	45	64	38	47	42	53	35	103	54	18	38	38	38	78	26	31	28	5	4	35	16	17	21	5	24	53	25	34	34	77	15	182	94	37	28	11	18	17	2	11	22	8
X1735	Bacillariophyta	Bacillariophyta_X	Polar-centric-Mediophyceae	Thalassiosira	NA	0	0	0	0	0	0	0	0	0	0	0	0	0	0	0	0	0	0	0	0	0	0	0	0	0	0	0	0	0	0	0	0	0	0	0	0	0	0	0	0	0	0	0	0
X1763	Bacillariophyta	Bacillariophyta_X	Polar-centric-Mediophyceae	Thalassiosira	NA	0	0	0	0	0	0	0	0	0	0	0	0	0	0	0	0	0	0	0	0	0	0	0	0	0	0	0	0	0	0	0	0	0	0	0	0	0	0	0	0	0	0	0	0
X2008	Bacillariophyta	Bacillariophyta_X	Polar-centric-Mediophyceae	Thalassiosira	NA	0	0	0	0	0	0	0	0	0	0	0	0	0	0	0	0	0	0	0	0	0	0	0	0	0	0	0	0	0	0	0	0	0	0	0	0	0	0	0	0	0	0	0	0
X2159	Bacillariophyta	Bacillariophyta_X	Polar-centric-Mediophyceae	Thalassiosira	NA	0	0	0	0	0	0	0	0	0	0	0	0	0	0	0	0	0	0	0	0	0	0	0	0	0	0	0	0	0	0	0	0	0	0	0	0	0	0	0	0	0	0	0	0
X216	Bacillariophyta	Bacillariophyta_X	Polar-centric-Mediophyceae	Thalassiosira	Thalassiosira_guillardii	0	3	2	4	1	1	1	1	3	10	0	0	4	1	6	2	1	3	10	13	4	14	6	21	9	3	5	27	6	12	16	184	247	526	163	65	146	35	21	13	0	0	0	0
X23	Bacillariophyta	Bacillariophyta_X	Polar-centric-Mediophyceae	Thalassiosira	Thalassiosira_oceanica	75	64	109	118	101	82	109	51	63	139	69	25	55	49	53	118	48	44	73	53	25	144	111	196	222	93	164	412	332	404	893	1422	834	2311	1268	911	3929	2862	3983	5286	317	922	485	194
X2605	Bacillariophyta	Bacillariophyta_X	Polar-centric-Mediophyceae	Thalassiosira	Thalassiosira_tenera	0	0	0	0	0	0	0	0	0	0	0	0	0	0	0	0	0	0	0	0	0	0	0	0	0	0	0	0	0	0	0	0	0	0	0	0	0	0	0	0	0	0	0	0
X27	Bacillariophyta	Bacillariophyta_X	Polar-centric-Mediophyceae	Thalassiosira	Thalassiosira_minima	238	182	443	1393	321	1032	1422	1048	803	1953	1111	368	839	331	869	1207	195	440	617	418	79	1311	451	169	389	132	326	173	88	173	73	59	108	424	255	145	15	17	10	11	0	5	21	14
X2729	Bacillariophyta	Bacillariophyta_X	Polar-centric-Mediophyceae	Thalassiosira	Thalassiosira_minima	0	0	1	1	1	0	0	1	0	6	5	4	2	0	2	0	0	0	0	0	0	0	0	0	0	0	0	0	0	0	0	0	0	0	0	0	0	0	0	0	0	0	0	0
X280	Bacillariophyta	Bacillariophyta_X	Polar-centric-Mediophyceae	Thalassiosira	NA	0	0	0	0	0	0	0	2	0	0	0	0	0	0	0	0	0	0	1	23	0	0	0	0	0	0	0	0	0	0	0	0	2	0	0	0	0	0	0	0	0	0	0	0
X286	Bacillariophyta	Bacillariophyta_X	Polar-centric-Mediophyceae	Thalassiosira	Thalassiosira_profunda	13	16	8	33	23	28	20	24	23	59	25	8	14	9	12	24	4	4	10	2	2	16	19	0	2	3	3	33	14	22	16	19	13	115	48	18	2	1	0	2	0	1	12	6
X3067	Bacillariophyta	Bacillariophyta_X	Polar-centric-Mediophyceae	Thalassiosira	Thalassiosira_cf_profunda	0	0	0	0	0	0	0	0	0	0	0	0	0	0	0	0	0	0	0	0	0	0	0	0	0	0	0	0	0	0	0	0	0	0	0	0	0	0	0	0	0	0	0	0
X3095	Bacillariophyta	Bacillariophyta_X	Polar-centric-Mediophyceae	Thalassiosira	NA	0	0	0	0	0	0	0	0	0	0	0	0	0	0	0	0	0	0	0	1	0	0	0	0	0	0	0	0	0	0	0	0	0	0	0	0	0	0	0	0	0	0	0	0
X3134	Bacillariophyta	Bacillariophyta_X	Polar-centric-Mediophyceae	Thalassiosira	Thalassiosira_minima	0	0	0	0	0	0	0	0	0	0	0	0	0	0	0	0	0	0	0	1	0	0	0	0	0	0	0	0	0	0	0	0	1	0	0	0	0	0	0	0	0	0	0	0
X3153	Bacillariophyta	Bacillariophyta_X	Polar-centric-Mediophyceae	Thalassiosira	Thalassiosira_rotula	0	0	0	0	0	0	0	0	0	0	0	0	0	0	0	0	0	0	0	1	0	0	0	0	0	0	0	0	0	0	0	0	0	0	0	0	0	0	0	0	0	0	0	0
X36	Bacillariophyta	Bacillariophyta_X	Polar-centric-Mediophyceae	Thalassiosira	NA	0	5	4	7	1	1	16	0	0	0	1	0	0	0	1	1	0	1	3	162	2	1	1	0	0	2	2	0	0	0	0	1	208	1	1	0	0	0	0	0	0	0	0	0
X3636	Bacillariophyta	Bacillariophyta_X	Polar-centric-Mediophyceae	Thalassiosira	Thalassiosira_oceanica	0	0	0	0	0	0	0	0	0	0	0	0	0	0	0	0	0	0	0	0	0	0	0	0	0	0	0	0	0	0	0	0	0	0	0	0	0	0	0	1	0	0	0	0
X3682	Bacillariophyta	Bacillariophyta_X	Polar-centric-Mediophyceae	Thalassiosira	Thalassiosira_oceanica	0	0	0	0	0	0	0	0	0	0	0	0	0	0	0	0	0	0	0	0	0	0	0	0	0	0	0	0	0	0	0	0	0	0	0	0	0	0	0	0	0	0	0	0
X3737	Bacillariophyta	Bacillariophyta_X	Polar-centric-Mediophyceae	Thalassiosira	Thalassiosira_cf_profunda	0	0	0	0	0	0	0	1	0	0	0	0	0	0	0	0	0	0	0	0	0	0	0	0	0	0	0	0	0	0	0	0	0	0	0	0	0	0	0	0	0	0	0	0
X4270	Bacillariophyta	Bacillariophyta_X	Polar-centric-Mediophyceae	Thalassiosira	NA	0	0	0	0	0	0	0	0	0	0	0	0	0	0	0	0	0	0	0	0	0	1	0	0	3	0	0	0	0	0	0	0	0	0	0	0	0	0	0	0	0	0	0	0
X4446	Bacillariophyta	Bacillariophyta_X	Polar-centric-Mediophyceae	Thalassiosira	Thalassiosira_oceanica	0	0	0	0	0	0	0	0	0	0	0	0	0	0	0	0	0	0	0	0	0	0	0	0	0	0	0	0	0	0	0	0	0	0	0	0	0	0	0	0	0	0	0	0
X597	Bacillariophyta	Bacillariophyta_X	Polar-centric-Mediophyceae	Thalassiosira	NA	9	4	14	18	9	14	15	7	7	42	10	3	21	12	17	25	4	7	3	1	5	6	11	4	3	1	4	8	6	3	4	18	1	22	9	4	11	4	8	1	0	0	1	0
X600	Bacillariophyta	Bacillariophyta_X	Polar-centric-Mediophyceae	Thalassiosira	Thalassiosira_minima	1	2	7	23	4	18	20	21	12	44	16	5	16	12	24	26	3	6	13	4	1	17	9	2	5	2	6	3	3	2	1	0	0	8	4	3	0	1	0	0	0	0	3	1
X619	Bacillariophyta	Bacillariophyta_X	Polar-centric-Mediophyceae	Thalassiosira	Thalassiosira_profunda	7	8	8	20	21	18	24	13	17	33	23	6	14	8	25	18	5	6	8	1	5	10	4	4	5	3	10	5	9	0	4	8	0	24	8	5	8	1	3	9	0	1	1	0
X679	Bacillariophyta	Bacillariophyta_X	Polar-centric-Mediophyceae	Thalassiosira	Thalassiosira_minima	5	2	5	14	4	7	14	17	5	25	7	4	5	3	8	5	1	5	4	6	2	12	8	1	2	1	2	1	0	1	0	0	0	1	3	0	0	0	0	0	0	0	0	1
X77	Bacillariophyta	Bacillariophyta_X	Polar-centric-Mediophyceae	Thalassiosira	Thalassiosira_curviseriata	24	46	65	281	62	208	208	195	95	141	62	17	57	27	58	72	23	33	70	127	8	110	30	23	27	12	54	18	11	35	14	24	278	129	59	30	1	0	1	2	1	1	1	0
X83	Bacillariophyta	Bacillariophyta_X	Polar-centric-Mediophyceae	Thalassiosira	Thalassiosira_tenera	2	1	9	7	6	2	59	3	2	10	1	4	1	0	2	7	2	0	0	54	0	1	3	1	0	0	0	1	0	3	0	1	295	3	2	1	0	0	2	0	0	0	0	0
X1449	Bangiophyceae	Bangiales	Bangiaceae	Porphyra	Porphyra_umbilicalis	0	0	0	0	1	0	0	0	1	0	1	0	0	0	0	0	0	0	0	0	0	0	3	0	0	0	0	1	0	4	9	0	0	0	1	0	0	0	0	0	0	0	0	0
X4237	Bangiophyceae	Bangiales	Bangiaceae	Porphyra	Porphyra_linearis	0	0	0	0	0	0	0	0	0	0	0	0	0	0	0	0	0	0	0	0	0	0	0	0	0	0	0	0	0	0	0	0	0	0	0	0	0	0	0	0	0	0	0	0
X4372	Bangiophyceae	Bangiales	Bangiaceae	Porphyra	NA	0	0	0	0	0	0	0	1	0	0	0	0	0	0	0	0	0	0	0	0	0	0	0	0	0	0	0	0	0	0	0	0	0	0	0	0	0	0	0	0	0	0	0	0
X3803	Bangiophyceae	Bangiales	Bangiaceae	Pyropia	Pyropia_tenera	0	0	0	0	0	0	0	0	0	0	0	0	0	0	0	0	0	0	0	1	0	0	0	0	0	0	0	0	0	0	0	0	0	0	0	0	0	0	1	0	0	0	0	0
X2151	Basidiomycota	Agaricomycotina	Agaricomycetes	Antrodia	Antrodia_malicola	0	1	0	0	1	0	0	0	1	0	1	0	0	0	0	0	0	0	0	0	0	0	0	0	0	0	0	0	0	0	0	0	0	0	0	0	0	0	0	0	0	0	0	0
X3906	Basidiomycota	Agaricomycotina	Agaricomycetes	Auricularia	Auricularia_polytricha	0	0	0	1	0	0	0	1	0	0	0	0	0	0	0	0	0	0	0	0	0	0	0	0	0	0	0	0	0	0	0	0	0	0	0	0	0	0	0	0	0	0	0	0
X582	Basidiomycota	Pucciniomycotina	Agaricostilbomycetes	Bensingtonia	Bensingtonia_yuccicola	10	23	4	7	0	1	22	4	0	0	5	2	8	0	1	2	0	0	0	0	4	0	14	12	1	10	4	0	38	1	11	0	0	1	0	0	1	0	5	2	0	51	0	1
X1941	Basidiomycota	Agaricomycotina	Agaricomycetes	Bjerkandera	Bjerkandera_sp.	0	4	3	1	1	0	2	0	0	0	1	0	1	0	0	0	0	0	1	0	0	0	0	0	0	0	0	0	1	1	0	0	0	0	0	0	0	0	0	0	0	0	0	0
X1072	Basidiomycota	Agaricomycotina	Tremellomycetes	Cryptococcus	Cryptococcus_terricola	0	0	0	0	2	0	2	13	7	5	0	0	0	1	7	3	3	1	0	2	0	3	10	0	2	1	1	0	5	0	5	13	0	5	3	14	0	8	1	4	1	26	2	5
X1077	Basidiomycota	Agaricomycotina	Tremellomycetes	Dioszegia	NA	0	0	0	1	0	0	3	0	0	0	0	0	0	0	0	0	0	0	0	0	0	1	0	0	0	0	0	0	1	0	0	0	0	0	0	0	0	0	0	3	0	0	0	0
X3486	Basidiomycota	Ustilaginomycotina	Exobasidiomycetes	Exobasidiomycetes_X	Exobasidiomycetes_X_sp.	1	1	0	0	0	0	0	0	0	0	0	0	0	0	0	0	0	0	0	0	0	0	0	0	0	0	0	0	0	0	0	0	0	0	0	0	0	0	0	0	0	0	0	0
X3143	Basidiomycota	Agaricomycotina	Agaricomycetes	Flammulina	Flammulina_velutipes	0	0	0	0	0	0	0	1	0	0	1	0	0	0	0	2	0	0	0	0	0	0	0	0	0	0	0	0	0	0	0	0	0	0	0	0	0	0	0	0	0	0	0	0
X1381	Basidiomycota	Agaricomycotina	Agaricomycetes	Galerina	Galerina_sp.	5	2	3	9	0	4	5	3	1	0	4	0	4	3	2	0	0	1	0	0	3	0	2	1	0	1	0	14	0	0	2	0	0	0	0	0	0	0	0	0	0	0	1	0
X1173	Basidiomycota	Pucciniomycotina	Microbotryomycetes	Glaciozyma	Glaciozyma_antarctica	0	0	0	0	0	0	0	0	0	0	0	0	1	0	0	2	0	0	0	0	0	0	0	0	0	0	0	0	2	0	0	0	0	0	0	0	0	0	0	0	0	3	0	0
X2507	Basidiomycota	Agaricomycotina	Agaricomycetes	Hericium	NA	0	0	1	1	0	0	1	1	0	0	0	0	0	1	0	0	0	0	0	0	0	0	0	0	0	0	0	0	0	0	0	0	0	0	0	0	0	0	0	0	0	0	0	0
X1502	Basidiomycota	Agaricomycotina	Agaricomycetes	Hydnomerulius	Hydnomerulius_sp.	0	1	0	0	0	0	1	0	0	0	0	0	0	0	0	0	0	0	0	0	0	0	0	0	0	0	0	0	0	0	0	0	0	0	0	0	0	0	0	0	0	0	0	0
X2485	Basidiomycota	Agaricomycotina	Agaricomycetes	Hymenopellis	Hymenopellis_radicata	0	4	0	1	5	0	3	1	0	0	0	0	1	0	0	0	0	0	0	0	0	0	0	0	0	0	0	0	0	0	0	0	0	0	0	0	0	0	0	0	0	0	0	0
X3080	Basidiomycota	Agaricomycotina	Agaricomycetes	Hyphodontia	Hyphodontia_sp.	6	2	0	0	0	0	0	0	0	1	1	0	0	0	0	0	0	0	0	0	0	0	0	0	0	0	0	0	0	0	0	0	0	0	0	0	0	0	0	0	0	0	0	0
X4151	Basidiomycota	Agaricomycotina	Agaricomycetes	Hyphodontia	Hyphodontia_paradoxa	0	0	0	0	0	0	0	0	0	0	0	0	0	0	0	0	0	0	0	0	0	0	0	0	0	0	0	0	0	0	0	0	0	0	0	0	0	0	0	0	0	0	0	0
X1927	Basidiomycota	Agaricomycotina	Agaricomycetes	Mrakia	Mrakia_frigida	1	3	0	0	0	10	1	1	0	0	4	1	0	0	0	0	0	0	0	0	0	0	0	0	0	0	0	0	0	0	0	0	0	0	0	0	0	0	0	2	0	0	0	0
X1430	Basidiomycota	Agaricomycotina	NA	NA	NA	0	0	0	0	0	0	0	0	0	0	1	0	0	0	0	0	0	0	0	0	0	0	0	0	0	0	0	0	0	0	2	0	0	0	0	0	0	0	0	0	0	0	0	0
X2324	Basidiomycota	Agaricomycotina	Agaricomycetes	NA	NA	1	3	0	2	2	3	0	0	0	0	0	0	1	1	3	2	0	0	0	0	0	0	0	0	0	0	0	0	1	0	1	0	0	0	0	3	1	0	0	1	0	0	0	0
X2402	Basidiomycota	Agaricomycotina	Tremellomycetes	NA	NA	0	3	0	0	0	0	2	0	0	0	1	0	0	0	0	0	0	0	0	0	0	0	0	0	0	0	0	0	0	0	0	0	0	0	0	0	0	0	0	0	0	1	0	0
X2759	Basidiomycota	Agaricomycotina	Agaricomycetes	NA	NA	0	0	0	0	0	0	0	0	0	0	0	0	0	0	0	0	0	0	0	0	0	0	0	0	0	0	0	0	0	0	0	0	0	0	0	0	0	0	0	0	0	0	0	0
X1238	Basidiomycota	NA	NA	NA	NA	0	13	4	3	5	7	5	2	1	3	0	0	1	0	2	0	1	3	3	1	1	2	1	0	0	0	1	1	1	0	1	3	0	0	1	0	1	0	0	0	5	0	0	1
X3805	Basidiomycota	Pucciniomycotina	Pucciniomycetes	Phragmidium	Phragmidium_mexicanum	0	0	0	0	0	0	0	0	0	0	0	0	0	0	0	0	0	0	0	0	0	0	0	0	0	0	0	0	0	0	0	0	0	0	0	0	0	0	0	0	0	0	0	0
X3961	Basidiomycota	Agaricomycotina	Agaricomycetes	Pseudocolus	Pseudocolus_fusiformis	0	0	0	0	0	0	0	0	0	0	0	0	0	0	0	1	0	0	0	0	0	0	0	0	0	0	0	0	0	0	0	0	0	0	0	0	0	0	0	0	0	0	0	0
X2589	Basidiomycota	Agaricomycotina	Agaricomycetes	Resinicium	Resinicium_bicolor	0	0	0	0	0	0	3	0	0	0	0	0	0	0	0	0	0	0	0	0	0	0	0	0	0	0	0	0	0	0	0	0	0	0	0	0	0	0	0	0	0	0	0	0
X1368	Basidiomycota	Pucciniomycotina	Cystobasidiomycetes	Rhodotorula	Rhodotorula_glutinis	10	1	6	19	6	1	6	2	1	0	0	0	0	0	2	0	0	0	0	0	0	0	1	0	1	0	0	0	0	0	0	1	0	0	0	0	0	0	0	0	0	0	0	0
X1883	Basidiomycota	Pucciniomycotina	Cystobasidiomycetes	Rhodotorula	Rhodotorula_lamellibrachiae	1	3	0	0	0	0	4	0	0	0	0	0	0	0	0	0	0	0	0	0	1	0	0	0	0	0	0	0	0	0	2	0	0	3	0	0	0	0	0	0	0	1	0	0
X2981	Basidiomycota	Pucciniomycotina	Cystobasidiomycetes	Rhodotorula	Rhodotorula_minuta	0	1	0	0	0	0	4	0	0	0	0	0	0	0	0	0	0	0	0	0	0	0	0	0	0	0	0	0	0	0	0	0	0	0	0	0	0	0	0	0	0	3	0	0
X3656	Basidiomycota	Agaricomycotina	Agaricomycetes	Sistotrema	NA	0	0	0	0	0	0	0	0	0	0	0	0	0	0	0	0	0	0	0	0	0	0	0	0	0	0	0	0	0	0	0	0	0	0	0	0	0	0	0	0	0	0	0	0
X3148	Basidiomycota	Ustilaginomycotina	Ustilaginomycetes	Sporisorium	Sporisorium_reilianum	0	0	1	0	0	0	0	0	0	0	0	0	0	0	0	0	0	0	0	0	0	0	0	0	0	0	0	0	0	0	0	0	0	0	0	0	0	0	0	1	0	0	0	0
X1312	Basidiomycota	Pucciniomycotina	Cystobasidiomycetes	Sporobolomyces	Sporobolomyces_ogasawarensis	1	2	0	2	0	0	2	0	0	0	1	0	0	2	0	0	0	0	0	0	2	0	0	1	0	0	0	0	3	0	1	0	0	1	0	0	0	0	0	0	0	1	0	0
X1355	Basidiomycota	Pucciniomycotina	Cystobasidiomycetes	Sporobolomyces	NA	0	0	0	0	0	0	0	0	0	0	0	0	0	0	0	0	0	0	0	0	0	0	0	0	0	0	0	0	0	0	0	0	0	0	0	0	0	0	0	0	0	0	0	0
X1893	Basidiomycota	Pucciniomycotina	Cystobasidiomycetes	Sporobolomyces	NA	0	0	0	0	0	0	0	0	0	0	0	0	0	0	0	0	0	0	0	0	0	1	0	0	0	0	0	0	0	0	0	0	0	0	0	0	0	0	0	0	0	1	0	0
X212	Basidiomycota	Pucciniomycotina	Cystobasidiomycetes	Sporobolomyces	NA	0	0	0	0	0	0	0	0	0	0	0	0	0	0	0	0	0	0	0	0	0	0	0	0	0	0	0	0	0	0	0	0	0	0	0	0	0	0	0	2	0	0	0	0
X2844	Basidiomycota	Pucciniomycotina	Cystobasidiomycetes	Sporobolomyces	Sporobolomyces_nylandii	0	0	0	1	0	0	0	0	0	0	0	0	0	0	0	0	0	0	0	0	0	0	0	0	0	0	0	0	0	0	0	0	0	0	0	0	0	0	0	0	0	0	0	0
X1674	Basidiomycota	Ustilaginomycotina	Exobasidiomycetes	Sympodiomycopsis	Sympodiomycopsis_paphiopedili	0	1	1	0	0	0	0	0	0	0	0	0	1	1	0	0	0	0	0	0	0	0	0	0	0	0	0	0	2	0	0	0	0	0	0	0	0	0	0	0	0	0	0	0
X1203	Basidiomycota	Agaricomycotina	Agaricomycetes	Trametes	Trametes_versicolor	2	8	6	1	1	3	14	5	1	9	1	0	1	2	0	0	0	0	0	0	0	0	0	0	0	0	0	0	0	0	0	0	0	2	0	0	0	0	0	1	0	0	0	0
X3647	Basidiomycota	Agaricomycotina	Agaricomycetes	Trechispora	Trechispora_alnicola	1	1	0	0	0	0	0	0	0	0	0	0	0	0	0	0	0	0	0	0	0	0	0	0	0	0	0	0	0	0	0	0	0	0	0	0	0	0	0	0	0	0	0	0
X3425	Basidiomycota	Wallemiomycetes	Wallemiales	Wallemia	Wallemia_sebi	3	4	0	0	0	0	1	1	0	1	0	1	0	0	0	0	0	0	0	0	0	0	0	0	0	0	0	2	0	0	0	0	0	0	0	0	0	0	0	0	0	0	0	0
X1993	Bicoecea	Bicoecales	Bicoecaceae	Bicoecaceae_X	Bicoecaceae_X_sp.	0	0	2	0	0	0	0	1	0	3	0	0	0	0	0	0	0	0	0	0	1	0	0	0	0	0	0	0	0	0	0	0	0	0	0	0	0	0	0	0	0	0	0	0
X3700	Bicoecea	Bicoecales	Bicoecaceae	Bicoecaceae_X	Bicoecaceae_X_sp.	0	0	0	0	0	0	0	0	0	0	0	0	0	0	0	0	0	0	0	0	0	0	0	0	0	0	0	0	0	0	0	0	0	0	0	0	0	0	0	0	0	0	0	0
X2607	Bicoecea	Bicoecales	Bicoecaceae	Bicosoeca	Bicosoeca_sp.	0	0	0	0	0	3	0	0	0	0	2	0	0	3	0	0	0	0	0	0	0	0	0	0	0	0	0	4	0	0	0	0	0	0	0	0	0	0	0	0	0	0	0	0
X2897	Bicoecea	Bicoecales	Bicoecaceae	Bicosoeca	Bicosoeca_sp.	2	0	0	0	0	0	0	0	0	0	0	0	0	0	0	0	0	0	1	0	0	0	0	0	0	0	0	0	0	0	0	0	0	0	0	0	0	0	0	0	0	0	0	0
X3381	Bicoecea	Bicoecales	Bicoecaceae	Bicosoeca	Bicosoeca_sp.	0	0	0	1	0	0	0	1	0	0	0	0	0	0	0	0	0	0	0	0	0	0	0	0	0	0	0	0	0	0	0	0	0	0	0	0	0	0	0	0	0	0	0	0
X1720	Bicoecea	Borokales	Borokaceae	Borokaceae_X	Borokaceae_X_sp.	2	20	2	0	0	2	11	0	1	0	1	1	1	2	0	1	0	0	0	0	0	1	0	0	2	1	1	6	1	0	0	0	0	0	1	2	0	0	1	0	0	0	0	0
X1786	Bicoecea	Borokales	Borokaceae	Borokaceae_X	Borokaceae_X_sp.	0	0	0	0	0	0	0	0	0	0	0	0	0	0	0	0	0	0	0	0	0	0	1	0	0	0	0	0	0	0	0	0	0	0	0	0	0	0	0	0	0	0	3	0
X1589	Bicoecea	Anoecales	Caecitellaceae	Caecitellaceae_X	Caecitellaceae_X_sp.	1	1	0	0	0	0	6	0	0	0	0	0	0	0	0	0	0	0	0	0	0	0	0	4	0	2	0	0	38	0	11	0	0	0	0	0	2	0	5	1	0	14	0	0
X1573	Bicoecea	Anoecales	Cafeteriaceae	Cafeteria	Cafeteria_roenbergensis	0	0	0	0	1	1	0	0	0	0	1	0	0	1	0	0	0	0	0	0	2	0	0	1	2	1	5	7	39	0	8	2	0	1	0	0	1	0	3	0	0	5	0	1
X4050	Bicoecea	Bicoecales	Bicoecaceae	NA	NA	0	0	0	1	0	0	0	0	0	0	0	0	0	0	0	0	0	0	0	0	0	0	0	0	0	0	0	0	0	0	0	0	0	0	0	0	0	0	0	0	0	0	0	0
X2305	Bicoecea	Anoecales	Cafeteriaceae	Pseudobodo	Pseudobodo_tremulans	0	0	0	0	0	0	0	0	0	0	0	0	0	0	0	0	0	0	0	0	0	0	0	0	0	0	0	0	0	0	0	0	0	0	0	0	0	0	0	0	0	0	0	0
X3702	Bicoecea	Anoecales	Cafeteriaceae	Pseudobodo	Pseudobodo_tremulans	1	1	0	0	0	0	3	0	0	0	0	0	0	0	0	0	0	0	0	0	0	0	1	2	0	1	0	0	0	0	0	0	0	0	0	0	0	0	0	0	0	1	0	0
X2175	Bolidophyceae	Parmales	NA	NA	NA	8	6	3	7	7	4	0	2	0	0	0	0	0	0	0	0	0	0	1	0	0	1	0	0	0	0	0	0	0	0	0	0	0	0	0	0	0	0	0	0	0	0	0	1
X2667	Bolidophyceae	Parmales	NA	NA	NA	0	0	0	0	1	1	0	0	0	0	0	0	0	0	0	0	0	0	0	0	0	0	0	0	0	0	0	0	0	0	0	0	0	0	0	0	0	0	0	0	0	0	0	0
X4263	Bolidophyceae	Parmales	NA	NA	NA	0	0	0	0	0	0	0	0	0	0	0	0	0	0	2	0	0	0	0	0	0	0	0	0	0	0	0	0	0	1	0	0	0	0	0	0	0	0	0	0	0	0	0	0
X3474	Bolidophyceae	Parmales	Parmales_env_1	Parmales_env_1_X	Parmales_env_1_X_sp.	0	0	0	0	0	0	0	0	0	0	0	0	0	0	0	0	0	0	0	0	0	0	0	0	0	0	0	0	0	0	0	0	0	0	0	0	0	0	0	0	0	0	0	0
X1711	Bolidophyceae	Parmales	Parmales_env_2	Parmales_env_2_X	Parmales_env_2_X_sp.	1	2	6	13	4	7	2	0	1	1	0	0	1	0	5	5	0	1	6	0	0	1	1	0	0	0	0	5	0	1	0	0	0	0	0	0	0	0	0	0	0	0	0	0
X1754	Bolidophyceae	Parmales	Parmales_env_2	Parmales_env_2_X	Parmales_env_2_X_sp.	1	0	0	1	0	2	0	0	0	0	0	0	2	4	3	0	0	0	0	0	0	0	0	0	0	0	1	33	5	5	1	7	0	4	4	0	0	0	0	0	0	0	0	0
X350	Bolidophyceae	Parmales	Parmales_env_2	Parmales_env_2_X	Parmales_env_2_X_sp.	103	112	143	139	125	85	67	33	26	65	14	2	11	14	34	39	13	12	70	0	11	20	8	3	2	3	2	261	22	33	6	5	0	2	1	0	0	0	1	0	0	1	0	0
X644	Bolidophyceae	Parmales	Parmales_env_2	Parmales_env_2_X	Parmales_env_2_X_sp.	62	48	97	91	44	24	23	4	7	7	1	2	4	0	0	0	0	1	15	0	0	1	0	0	1	0	0	14	1	3	1	0	0	0	0	0	0	0	0	0	0	0	0	0
X675	Bolidophyceae	Parmales	Parmales_env_3	Parmales_env_3A	Parmales_env_3A_sp.	7	6	6	14	2	13	4	7	9	16	3	3	4	5	8	8	1	3	19	0	6	3	1	2	0	0	2	142	11	19	5	1	0	2	1	1	2	0	0	0	0	2	1	1
X2964	Bolidophyceae	Parmales	Parmales_env_3	Parmales_env_3B	Parmales_env_3B_sp.	0	0	0	0	0	0	0	0	0	0	0	0	0	0	0	0	0	0	0	0	0	0	0	0	0	0	0	0	0	0	0	0	0	0	0	0	0	0	0	0	0	0	0	0
X220	Bolidophyceae	Parmales	Parmales_X	Parmales_XX	Parmales_XX_sp.	40	50	48	65	42	46	45	18	11	33	15	3	12	5	3	7	0	2	11	0	2	3	0	1	2	4	1	28	5	21	0	3	0	2	0	1	10	0	0	0	0	0	0	0
X1216	Bolidophyceae	Parmales	Triparmaceae	Triparma	Triparma_laevis_clade	0	1	0	0	1	2	3	1	2	4	0	1	5	5	12	4	1	4	17	0	5	8	1	1	2	2	5	45	2	13	0	1	0	2	0	0	0	0	0	0	2	0	1	0
X1175	Brachiopoda	Brachiopoda_X	Brachiopoda_XX	Phoronis	NA	3	0	0	1	0	18	0	0	1	0	0	0	0	0	0	0	0	0	17	0	0	0	0	2	0	0	6	0	0	1	0	0	0	0	0	0	0	2	0	0	0	1	1	4
X2150	Brachiopoda	Brachiopoda_X	Brachiopoda_XX	Phoronis	NA	0	9	0	0	2	0	0	0	1	4	0	0	1	0	0	0	0	1	0	0	1	0	0	0	0	0	0	0	2	0	0	0	0	0	0	3	0	0	0	0	1	0	0	0
X466	Brachiopoda	Brachiopoda_X	Brachiopoda_XX	Phoronis	Phoronis_muelleri	0	0	0	0	0	1	0	0	0	0	0	1	3	1	0	0	0	0	1	1	0	0	2	0	10	6	1	86	9	0	0	18	0	242	0	0	1	0	3	36	10	2	15	9
X3388	Breviatea_X	Breviatea_XX	Breviatea_XXX	Breviatea_XXXX	Breviatea_XXXX_sp.	0	0	0	0	0	1	0	0	0	0	0	0	0	0	0	0	0	0	0	0	0	0	0	0	0	0	0	0	0	0	0	0	0	0	0	0	0	0	0	0	0	0	0	0
X2163	Breviatea_X	Breviatea_XX	Subulatomonas-lineage	Subulatomonas-lineage_X	Subulatomonas-lineage_X_sp.	1	0	0	0	0	0	3	2	2	0	2	0	1	1	0	0	0	1	1	0	0	0	0	0	0	0	1	0	0	0	1	0	0	0	0	0	0	0	0	0	0	1	0	0
X2867	Breviatea_X	Breviatea_XX	Subulatomonas-lineage	Subulatomonas-lineage_X	Subulatomonas-lineage_X_sp.	0	0	0	1	0	0	0	0	1	0	0	0	0	0	0	0	0	0	0	0	0	0	0	0	0	0	1	0	0	0	1	0	0	1	0	0	0	0	0	0	0	0	0	0
X3368	Breviatea_X	Breviatea_XX	Subulatomonas-lineage	Subulatomonas-lineage_X	Subulatomonas-lineage_X_sp.	3	0	0	0	0	0	0	0	0	0	0	0	0	0	0	1	0	0	0	0	0	0	0	0	0	0	0	0	0	0	0	0	0	0	0	0	0	0	0	0	0	0	0	0
X1747	Bryozoa	Bryozoa_X	Bryozoa_XX	Alcyonidium	Alcyonidium_mamillatum	0	1	0	3	4	1	1	0	0	0	0	0	1	0	0	0	0	0	0	0	0	0	0	0	0	0	0	0	0	0	0	0	0	0	0	0	0	0	0	0	0	0	0	0
X1465	Bryozoa	Bryozoa_X	Bryozoa_XX	Callopora	Callopora_lineata	0	0	0	1	0	0	0	0	0	5	0	0	0	0	0	1	0	0	1	0	0	0	1	0	0	0	0	2	2	1	2	1	0	0	1	2	0	0	2	2	1	7	0	0
X2864	Bryozoa	Bryozoa_X	Bryozoa_XX	Callopora	Callopora_lineata	0	0	1	0	1	0	0	0	0	1	1	0	0	0	0	0	2	0	0	0	0	0	0	0	0	0	0	0	0	0	0	0	0	0	0	0	0	0	0	0	0	0	0	0
X1997	Bryozoa	Bryozoa_X	Bryozoa_XX	Crisia	Crisia_aculeata	0	0	0	2	0	0	0	0	0	0	0	0	0	0	1	0	0	0	0	0	1	0	0	0	0	0	0	0	0	0	0	0	0	0	0	1	0	0	0	0	0	0	0	0
X831	Bryozoa	Bryozoa_X	Bryozoa_XX	Crisia	Crisia_aculeata	2	1	0	3	0	1	3	1	2	2	1	1	4	5	1	1	0	0	0	0	2	0	1	0	2	0	2	0	6	1	1	2	0	0	1	3	0	0	0	0	3	2	0	3
X930	Bryozoa	Bryozoa_X	Bryozoa_XX	Crisia	NA	3	3	1	3	3	1	4	1	1	2	2	1	4	9	2	4	0	0	3	1	4	0	0	0	2	2	0	0	2	1	0	2	0	2	0	0	0	0	0	1	0	0	0	0
X2972	Bryozoa	Bryozoa_X	Bryozoa_XX	Cryptosula	Cryptosula_pallasiana	0	0	0	0	3	1	0	0	0	3	0	0	0	0	0	0	0	0	0	0	0	0	0	0	0	0	0	0	0	0	0	0	0	0	0	0	0	0	0	0	0	0	0	0
X3020	Bryozoa	Bryozoa_X	Bryozoa_XX	Electra	Electra_pilosa	0	0	0	0	0	0	0	0	0	0	0	0	0	0	0	0	0	0	0	0	0	0	0	0	0	0	0	0	0	0	0	0	0	0	0	0	0	0	0	0	0	1	0	0
X3145	Bryozoa	Bryozoa_X	Bryozoa_XX	Electra	Electra_pilosa	0	0	0	0	0	0	0	0	0	0	0	0	0	0	0	0	0	0	0	0	0	0	0	0	0	0	0	0	0	0	0	0	0	1	0	0	0	0	0	0	0	1	0	0
X358	Bryozoa	Bryozoa_X	Bryozoa_XX	Electra	Electra_pilosa	10	2	8	24	5	39	13	20	5	12	10	8	2	1	8	17	1	1	5	0	13	7	9	2	1	5	2	14	16	2	9	11	0	10	14	5	0	0	5	10	4	17	2	1
X3423	Bryozoa	Bryozoa_X	Bryozoa_XX	Escharella	Escharella_immersa	0	0	0	0	0	0	0	0	0	0	0	0	0	0	0	0	0	0	0	0	0	0	0	0	0	0	0	0	0	0	0	0	0	0	0	0	0	0	0	0	0	0	0	0
X706	Bryozoa	Bryozoa_X	Bryozoa_XX	Escharella	Escharella_immersa	3	1	0	2	4	0	3	1	0	1	3	0	3	0	2	3	0	1	1	1	0	3	2	4	0	0	0	0	10	2	4	1	0	4	2	5	0	0	1	1	7	7	5	0
X2674	Bryozoa	Bryozoa_X	Bryozoa_XX	Escharoides	Escharoides_coccinea	0	1	0	0	0	0	0	0	0	7	3	0	1	0	0	0	0	0	0	1	0	1	0	0	0	0	0	0	0	0	0	0	0	1	0	0	0	0	0	0	0	0	2	0
X975	Bryozoa	Bryozoa_X	Bryozoa_XX	Flustra	Flustra_foliacea	5	0	4	12	5	6	2	1	2	8	3	0	2	0	0	1	0	0	3	0	4	4	1	0	0	0	2	0	4	1	0	0	0	1	0	3	0	0	2	1	1	3	3	1
X3298	Bryozoa	Bryozoa_X	Bryozoa_XX	Membranipora	Membranipora_membranacea	0	0	0	0	0	0	0	0	0	0	0	0	0	0	0	0	0	0	0	0	0	0	0	0	0	0	0	0	0	0	0	0	0	0	0	0	0	0	0	0	0	0	0	0
X3304	Bryozoa	Bryozoa_X	Bryozoa_XX	Membranipora	Membranipora_membranacea	0	0	0	0	0	0	0	0	0	0	0	0	0	0	0	0	0	0	0	0	0	0	0	0	0	0	0	0	0	0	0	0	0	0	0	0	0	0	0	0	0	0	0	0
X4229	Bryozoa	Bryozoa_X	Bryozoa_XX	Membranipora	NA	0	0	0	0	0	0	0	0	0	0	0	0	0	0	0	0	0	0	0	0	0	0	0	0	0	0	0	0	0	0	0	0	0	0	0	0	0	0	0	0	0	0	0	0
X436	Bryozoa	Bryozoa_X	Bryozoa_XX	Membranipora	Membranipora_membranacea	5	0	1	3	1	0	9	0	1	2	0	0	2	2	3	6	1	5	9	0	0	2	5	0	2	0	4	8	14	7	15	6	3	6	1	4	0	0	2	5	3	4	1	0
X2259	Bryozoa	Bryozoa_X	Bryozoa_XX	NA	NA	0	0	0	0	0	0	0	0	0	0	0	0	0	0	0	0	0	0	0	0	0	0	0	0	0	0	0	0	0	0	0	0	0	0	0	0	0	0	0	0	0	0	0	0
X2378	Bryozoa	Bryozoa_X	Bryozoa_XX	NA	NA	0	0	0	0	0	1	0	0	0	0	0	0	0	0	0	0	0	0	0	0	0	0	0	0	0	0	0	0	1	0	0	0	0	0	0	0	0	0	0	0	0	0	0	0
X2540	Bryozoa	Bryozoa_X	Bryozoa_XX	NA	NA	0	0	0	0	0	1	0	0	0	0	0	0	0	0	0	0	0	0	0	0	0	0	0	0	0	0	0	0	0	0	0	0	0	0	0	0	0	0	0	0	0	0	0	0
X2778	Bryozoa	Bryozoa_X	Bryozoa_XX	NA	NA	0	0	0	1	0	1	2	1	0	0	0	0	0	0	1	2	0	0	0	0	0	0	0	0	0	0	1	0	0	0	0	0	0	3	0	0	0	0	0	0	0	0	0	0
X3252	Bryozoa	Bryozoa_X	Bryozoa_XX	NA	NA	0	0	0	0	0	0	0	0	0	0	0	0	0	0	0	0	0	0	0	0	0	0	0	0	0	0	0	0	0	0	0	0	0	0	0	0	0	0	0	0	0	0	0	0
X3691	Bryozoa	Bryozoa_X	Bryozoa_XX	NA	NA	0	0	0	0	0	0	0	0	0	0	0	0	0	0	0	0	0	0	0	0	0	0	0	0	0	0	0	0	0	0	0	0	0	0	0	0	0	0	0	0	0	1	0	0
X914	Bryozoa	Bryozoa_X	Bryozoa_XX	NA	NA	1	0	2	2	0	0	0	1	0	4	0	0	0	0	0	0	0	0	0	0	0	0	1	0	0	0	0	0	1	0	2	0	0	0	0	0	0	0	0	2	0	0	2	0
X978	Bryozoa	Bryozoa_X	Bryozoa_XX	NA	NA	5	0	0	0	4	0	1	0	1	7	1	0	2	0	0	2	0	0	0	0	0	0	3	0	1	0	0	3	0	3	0	0	0	0	0	0	0	0	0	0	0	0	1	0
X2022	Bryozoa	Bryozoa_X	Bryozoa_XX	Plagioecia	Plagioecia_patina	1	0	2	0	0	0	2	0	1	0	0	0	1	0	1	0	0	0	0	0	0	0	0	0	0	0	0	0	1	0	3	0	0	0	0	0	0	0	0	0	0	0	1	2
X1839	Bryozoa	Bryozoa_X	Bryozoa_XX	Scruparia	Scruparia_chelata	0	0	0	0	0	4	0	0	0	1	0	0	0	0	0	0	0	0	0	0	0	0	0	0	0	0	0	0	0	0	0	0	0	0	0	0	0	0	0	0	0	0	0	0
X1692	Bryozoa	Bryozoa_X	Bryozoa_XX	Tubulipora	Tubulipora_liliacea	0	1	0	1	0	0	0	0	0	0	0	0	0	0	0	0	1	0	0	0	1	0	0	0	0	0	1	0	0	0	0	2	0	0	0	0	0	0	0	0	0	0	0	0
X797	Bryozoa	Bryozoa_X	Bryozoa_XX	Tubulipora	Tubulipora_lobifera	1	3	1	1	3	4	7	0	3	5	2	4	1	2	0	7	0	0	2	0	0	3	1	1	1	2	2	0	0	3	0	1	0	0	2	1	0	0	0	1	0	1	0	1
X1170	Centroheliozoa_X	Centroheliozoa_XX	Centroheliozoa_XXX	Centroheliozoa_XXXX	Centroheliozoa_XXXX_sp.	0	0	0	0	0	2	0	1	0	0	0	0	0	0	0	0	0	0	0	0	0	0	1	0	0	2	2	0	1	0	0	0	0	0	0	0	0	0	0	2	0	4	0	0
X1242	Centroheliozoa_X	Centroheliozoa_XX	Centroheliozoa_XXX	Centroheliozoa_XXXX	Centroheliozoa_XXXX_sp.	0	0	0	0	0	0	4	0	0	0	0	0	0	0	3	4	0	0	0	0	0	0	0	0	0	0	0	0	2	2	1	0	0	3	0	0	0	0	2	1	0	5	0	0
X1551	Centroheliozoa_X	Centroheliozoa_XX	Centroheliozoa_XXX	Centroheliozoa_XXXX	Centroheliozoa_XXXX_sp.	0	0	2	4	0	1	0	4	4	4	14	0	4	25	1	2	0	0	0	1	0	2	0	0	0	0	2	0	0	1	0	1	0	0	4	0	0	0	0	1	0	0	0	0
X2207	Centroheliozoa_X	Centroheliozoa_XX	Centroheliozoa_XXX	Centroheliozoa_XXXX	Centroheliozoa_XXXX_sp.	0	0	1	2	0	0	0	3	0	0	0	0	0	0	1	0	0	0	2	0	0	3	0	0	0	0	0	2	0	0	0	0	0	2	0	1	1	0	0	0	0	0	0	0
X258	Centroheliozoa_X	Centroheliozoa_XX	Centroheliozoa_XXX	Centroheliozoa_XXXX	Centroheliozoa_XXXX_sp.	53	39	64	148	73	61	39	16	27	73	14	7	22	19	10	16	0	8	1	2	0	8	6	2	7	4	4	22	7	11	33	117	11	430	164	104	132	49	78	102	5	20	22	8
X3453	Centroheliozoa_X	Centroheliozoa_XX	Centroheliozoa_XXX	Centroheliozoa_XXXX	Centroheliozoa_XXXX_sp.	0	0	0	0	0	0	0	0	0	0	1	0	0	0	0	0	0	0	0	0	0	0	7	0	0	4	0	0	1	0	1	0	0	0	0	0	0	0	0	0	0	0	0	0
X3707	Centroheliozoa_X	Centroheliozoa_XX	Centroheliozoa_XXX	Centroheliozoa_XXXX	Centroheliozoa_XXXX_sp.	0	0	0	0	0	0	0	0	1	0	0	0	0	0	0	0	0	0	0	0	0	0	0	0	0	0	0	0	0	0	0	0	0	2	0	0	0	0	0	0	0	0	0	0
X4064	Centroheliozoa_X	Centroheliozoa_XX	Centroheliozoa_XXX	Centroheliozoa_XXXX	Centroheliozoa_XXXX_sp.	0	0	0	0	0	0	0	0	0	0	0	0	0	0	0	0	0	0	0	0	0	0	0	0	0	0	0	0	4	0	0	0	0	0	0	0	0	0	0	0	0	0	0	2
X4181	Centroheliozoa_X	Centroheliozoa_XX	Centroheliozoa_XXX	Centroheliozoa_XXXX	Centroheliozoa_XXXX_sp.	0	0	0	0	0	2	0	2	0	0	0	0	0	0	0	0	0	0	0	0	0	0	0	0	0	0	0	0	0	0	0	0	0	0	0	0	0	0	0	0	0	0	0	0
X4022	Centroheliozoa_X	Pterocystida	Heterophryidae	Heterophrys	Heterophrys_sp.	0	0	0	0	0	1	0	0	0	0	0	0	0	0	0	0	0	0	0	0	0	0	0	0	0	0	0	0	0	0	0	0	0	0	0	0	0	0	0	0	0	0	0	0
X1336	Centroheliozoa_X	NA	NA	NA	NA	0	0	0	11	3	0	2	1	0	2	5	0	0	0	0	0	0	0	0	0	1	0	10	3	0	0	0	0	0	0	0	0	0	1	0	0	0	0	0	0	0	0	0	0
X2969	Centroheliozoa_X	NA	NA	NA	NA	2	7	0	0	0	0	3	0	0	0	0	0	0	0	0	0	0	0	0	0	0	0	0	0	0	1	0	0	0	0	0	0	0	0	0	0	0	0	0	0	0	0	0	0
X3222	Centroheliozoa_X	NA	NA	NA	NA	0	0	0	0	0	0	0	0	0	0	0	0	0	0	0	0	0	0	0	0	0	0	1	0	0	0	0	0	0	0	0	0	0	0	0	0	0	0	0	0	0	0	0	0
X3483	Centroheliozoa_X	NA	NA	NA	NA	2	0	0	0	0	0	0	0	0	0	0	0	1	0	0	0	0	0	0	0	0	0	0	0	0	0	0	0	0	0	0	0	1	0	0	0	0	0	0	0	0	0	0	0
X1281	Centroheliozoa_X	Pterocystida	NA	NA	NA	0	0	0	0	0	0	0	0	0	0	0	0	0	0	0	0	0	0	0	0	0	0	0	0	0	0	0	0	0	0	0	0	0	0	0	0	0	0	0	0	0	0	0	0
X2801	Centroheliozoa_X	Pterocystida	NA	NA	NA	0	0	0	0	3	0	5	0	1	4	1	0	0	1	0	2	0	0	1	0	1	0	0	0	0	0	0	0	0	0	0	0	0	0	0	0	0	0	0	0	0	0	0	0
X3260	Centroheliozoa_X	Pterocystida	NA	NA	NA	1	0	2	2	1	0	0	0	1	0	0	0	0	5	0	2	0	0	1	0	0	1	0	0	1	0	0	0	0	0	0	0	0	0	0	0	0	0	0	0	0	0	0	0
X3541	Centroheliozoa_X	Pterocystida	NA	NA	NA	2	4	0	0	0	0	3	0	0	0	0	0	0	0	0	0	0	0	0	0	0	0	1	0	0	0	0	0	1	0	0	0	0	0	0	0	0	0	0	0	0	0	0	0
X3790	Centroheliozoa_X	Pterocystida	NA	NA	NA	0	0	1	0	0	0	0	0	0	0	0	0	0	2	0	0	2	0	0	0	0	0	0	0	0	0	0	0	0	0	0	0	0	0	3	0	0	0	0	1	0	0	0	0
X1293	Centroheliozoa_X	Pterocystida	Pterocystida_X	Pterocystida_XX	Pterocystida_XX_sp.	0	0	0	0	0	0	0	0	0	0	0	0	0	3	0	0	0	1	0	0	0	0	0	0	0	0	1	0	0	0	0	0	0	4	1	1	0	0	0	0	0	0	0	0
X2181	Centroheliozoa_X	Pterocystida	Pterocystida_X	Pterocystida_XX	Pterocystida_XX_sp.	0	0	0	0	1	3	1	0	2	1	1	0	4	1	1	1	0	0	3	0	1	2	0	1	1	0	0	1	0	1	0	0	0	0	0	0	2	0	2	0	1	0	0	0
X3084	Centroheliozoa_X	Pterocystida	Pterocystida_X	Pterocystida_XX	Pterocystida_XX_sp.	1	0	0	0	0	0	0	0	0	0	0	0	0	0	0	0	0	0	0	0	0	0	0	0	0	0	1	4	0	1	0	0	0	0	0	0	0	1	0	1	0	0	0	0
X749	Centroheliozoa_X	Pterocystida	Pterocystida_X	Pterocystida_XX	Pterocystida_XX_sp.	0	5	5	6	7	11	4	1	4	23	7	2	10	17	10	17	1	6	22	2	7	12	4	1	5	3	3	9	9	7	3	1	0	4	2	0	8	2	6	2	1	7	1	0
X2396	Centroheliozoa_X	Pterocystida	Pterocystidae	Pterocystis	NA	0	0	3	0	3	4	0	0	2	0	7	0	0	6	0	0	0	0	0	0	0	2	0	0	0	0	2	0	0	1	0	0	0	0	0	0	0	0	0	2	1	0	1	1
X2898	Centroheliozoa_X	Pterocystida	Pterocystidae	Pterocystis	Pterocystis_sp.	1	2	3	1	1	4	1	1	1	0	0	0	0	0	0	1	0	2	0	0	0	0	0	0	0	0	0	0	0	0	0	0	0	0	0	0	0	0	0	0	0	0	0	1
X4176	Cephalochordata	Cephalochordata_X	Cephalochordata_XX	Branchiostoma	Branchiostoma_floridae	0	3	0	0	0	0	0	0	0	0	0	0	0	0	0	0	0	0	0	0	0	0	0	0	0	0	0	0	0	0	0	0	0	0	0	0	0	0	0	0	0	0	0	0
X2369	Cercozoa_X	Cercozoa_XX	Cercozoa_XXX	Cercozoa_XXXX	Cercozoa_XXXX_sp.	0	2	0	0	0	0	0	0	1	0	0	0	0	0	0	1	0	0	3	0	0	1	0	0	0	4	3	2	0	6	4	2	0	0	0	1	0	0	0	0	0	0	0	0
X1936	Chaetognatha	Aphragmophora	Aphragmophora_X	NA	NA	0	0	0	0	0	0	0	0	0	0	0	0	0	0	0	0	0	0	0	0	0	0	0	0	0	0	0	0	0	0	0	0	0	0	0	0	0	0	0	0	0	2	0	0
X2855	Chaetognatha	Aphragmophora	Aphragmophora_X	NA	NA	0	0	0	0	0	0	0	0	0	0	0	0	0	0	0	0	0	0	0	0	0	0	0	0	0	0	0	0	0	0	0	0	0	0	0	0	0	0	0	0	0	0	0	0
X3567	Chaetognatha	Aphragmophora	Aphragmophora_X	Parasagitta	Parasagitta_setosa	0	0	0	0	0	0	0	0	0	0	0	0	1	0	0	0	0	0	0	0	0	0	0	0	0	1	1	0	0	0	1	0	0	0	0	0	0	0	0	0	0	0	0	0
X152	Chaetognatha	Aphragmophora	Aphragmophora_X	Sagitta	Sagitta_bipunctata	0	0	0	0	0	0	0	0	1	0	0	1	30	0	0	0	0	1	0	0	6	0	2	6	0	7	1	4	48	2	6	0	0	84	354	2	0	0	7	12	107	168	0	2
X1120	Chlorarachniophyceae	Chlorarachnida	Chlorarachnida_X	Chlorarachnion	Chlorarachnion_sp.	0	0	0	0	0	2	1	0	2	1	0	0	0	0	0	1	0	0	0	0	1	0	1	1	0	2	1	1	1	0	2	1	1	2	0	0	0	0	4	1	0	2	0	0
X2716	Chlorarachniophyceae	Chlorarachnida	Chlorarachnida_X	Chlorarachnion	Chlorarachnion_sp.	0	0	0	0	0	0	0	0	0	0	0	0	0	0	0	0	0	0	0	0	0	0	0	0	0	0	0	0	0	0	0	0	0	0	0	0	0	0	0	0	0	0	0	0
X2742	Chlorarachniophyceae	Chlorarachnida	Chlorarachnida_X	Chlorarachnion	Chlorarachnion_sp.	0	0	0	0	0	0	0	0	0	1	0	0	0	0	0	0	0	0	0	0	0	0	0	0	0	0	0	0	0	0	0	0	0	0	0	0	0	0	0	0	0	0	0	0
X3215	Chlorarachniophyceae	Chlorarachnida	Chlorarachnida_X	Chlorarachnion	Chlorarachnion_sp.	0	0	0	1	0	0	0	0	1	0	0	0	1	0	0	0	0	0	0	0	0	0	0	0	0	0	0	0	0	0	0	0	0	2	0	0	1	0	4	2	0	0	0	0
X2800	Chlorarachniophyceae	Chlorarachniophyceae_X	LC104-lineage	LC104-lineage_X	LC104-lineage_X_sp.	1	0	0	0	0	0	0	0	0	0	0	0	3	1	0	0	0	0	1	0	2	1	0	0	0	0	0	19	1	1	0	0	0	0	0	0	0	0	0	0	0	0	0	0
X3044	Chlorarachniophyceae	Chlorarachniophyceae_X	LC104-lineage	LC104-lineage_X	LC104-lineage_X_sp.	1	0	0	0	3	2	3	0	0	0	2	0	0	6	0	0	0	0	0	0	0	0	0	0	0	0	0	4	0	0	0	0	0	0	0	0	0	0	0	0	0	0	0	0
X334	Chlorarachniophyceae	Chlorarachniophyceae_X	NPK2-lineage	NPK2-lineage_X	NPK2-lineage_X_sp.	37	27	55	51	15	44	41	62	40	102	36	14	48	37	45	28	5	6	25	2	13	30	7	16	26	27	37	30	24	44	26	15	0	26	9	9	8	7	15	7	4	6	1	7
X941	Chlorarachniophyceae	Chlorarachniophyceae_X	NPK2-lineage	NPK2-lineage_X	NPK2-lineage_X_sp.	0	0	0	0	0	0	0	0	0	0	0	0	0	0	0	0	0	0	0	0	0	0	0	0	0	0	0	0	0	0	2	0	0	0	0	0	0	0	0	0	0	0	0	0
X1313	Chlorophyceae	Chlamydomonadales	Chlamydomonadales_X	Chlamydomonas	Chlamydomonas_parkeae	0	3	0	1	2	0	4	2	1	2	1	0	2	1	0	0	0	0	3	0	0	0	0	0	0	0	0	0	0	1	0	0	0	0	0	0	0	1	1	2	2	1	0	0
X1932	Chlorophyceae	Chlamydomonadales	Chlamydomonadales_X	Chlamydomonas	NA	0	0	0	0	0	0	0	0	0	0	0	0	0	0	0	0	0	0	0	0	0	0	0	0	0	0	0	0	0	0	0	0	0	0	0	0	0	0	3	0	0	0	0	0
X3256	Chlorophyceae	Chlamydomonadales	Chlamydomonadales_X	Chlamydomonas	Chlamydomonas_reginae	0	0	0	0	0	0	0	0	0	0	0	0	0	0	0	0	0	0	0	0	0	0	0	0	0	0	0	0	0	0	0	0	0	0	0	0	0	0	0	0	0	0	0	0
X2660	Chlorophyceae	Chlamydomonadales	Coccomyxaceae	Coccomyxa	Coccomyxa_sp.	3	0	0	0	0	0	0	0	0	0	0	0	0	0	0	0	0	0	0	0	0	0	0	0	0	0	0	0	0	0	0	0	0	0	0	0	0	0	0	0	0	0	0	0
X2798	Chlorophyceae	Chlamydomonadales	Coccomyxaceae	Coccomyxa	Coccomyxa_sp.	2	0	0	0	0	0	0	0	1	0	0	0	0	0	0	0	0	0	0	0	0	0	0	0	0	0	0	1	0	0	0	0	0	0	0	0	0	0	0	0	0	0	0	0
X2871	Chlorophyceae	Sphaeropleales	Sphaeropleales_X	Coelastrum	Coelastrum_microporum	0	0	0	0	0	0	0	0	0	0	2	0	0	0	0	0	0	0	0	0	0	0	1	0	0	0	0	0	0	0	0	0	0	1	0	0	0	0	0	0	0	0	0	0
X1225	Chlorophyceae	Sphaeropleales	Sphaeropleales_X	Desmodesmus	Desmodesmus_costato-granulatus	0	0	0	2	1	1	3	0	0	1	0	0	0	0	2	0	0	0	2	0	0	3	0	3	2	0	0	2	7	0	0	0	0	3	0	0	0	0	0	0	0	0	0	0
X1745	Chlorophyceae	Sphaeropleales	Sphaeropleales_X	Desmodesmus	Desmodesmus_communis	2	0	0	0	0	0	0	0	1	0	0	0	0	1	0	1	0	0	0	3	1	0	0	0	1	0	2	0	0	1	3	0	0	1	0	0	1	0	0	0	0	0	0	0
X3043	Chlorophyceae	Sphaeropleales	Sphaeropleales_X	Desmodesmus	Desmodesmus_sp.	3	0	2	2	0	0	1	1	0	0	0	0	0	1	1	0	0	0	0	0	0	0	0	0	0	0	0	0	0	0	0	0	0	0	0	0	0	0	0	0	0	0	0	0
X592	Chlorophyceae	Sphaeropleales	Sphaeropleales_X	Desmodesmus	Desmodesmus_communis	3	0	2	4	5	6	1	1	6	2	0	0	1	0	1	2	0	2	4	0	2	2	0	0	6	1	1	1	2	0	5	7	1	7	5	2	0	0	0	0	0	0	0	0
X800	Chlorophyceae	Sphaeropleales	Sphaeropleales_X	Desmodesmus	Desmodesmus_intermedius	9	4	7	10	9	2	12	2	2	20	3	4	2	5	0	3	1	0	4	1	1	1	3	3	2	0	0	8	0	1	1	4	0	1	1	0	0	0	0	0	0	0	0	0
X3464	Chlorophyceae	Chlamydomonadales	Chlamydomonadales_X	Gloeocystis	Gloeocystis_polydermatica	0	0	0	0	0	0	0	0	0	0	0	0	0	0	0	0	0	0	0	0	0	0	0	0	0	0	0	0	0	0	0	0	0	0	0	0	0	0	0	0	0	0	0	0
X3665	Chlorophyceae	Sphaeropleales	Selenastraceae	Monoraphidium	NA	0	0	0	0	0	0	0	0	0	0	0	0	0	0	0	0	0	0	0	0	0	0	0	0	0	0	0	0	0	0	0	0	0	0	3	0	0	0	0	0	0	1	0	0
X2164	Chlorophyceae	Sphaeropleales	Sphaeropleales_X	Mychonastes	Mychonastes_sp.	1	1	1	0	1	1	1	2	0	8	0	0	0	0	0	0	0	0	3	0	1	0	0	0	0	0	0	2	0	1	1	0	0	3	1	0	0	0	0	0	0	0	0	0
X1914	Chlorophyceae	Sphaeropleales	Sphaeropleales_X	NA	NA	0	0	0	0	0	0	0	0	0	0	0	0	0	0	0	0	0	0	0	1	0	0	0	0	0	0	0	0	1	0	0	0	0	0	0	0	0	0	0	0	0	0	0	0
X4025	Chlorophyceae	Sphaeropleales	Sphaeropleales_X	Pseudopediastrum	Pseudopediastrum_kawraiskyi	0	0	0	0	0	0	0	0	0	0	0	0	0	0	0	0	0	0	0	0	0	0	0	0	0	0	0	0	0	0	0	0	0	0	0	0	0	0	0	0	0	0	0	0
X3271	Chlorophyceae	Sphaeropleales	Sphaeropleales_X	Scenedesmus	Scenedesmus_obliquus	0	0	0	0	0	0	0	0	0	0	0	0	0	0	0	0	0	0	0	0	0	0	0	0	0	1	0	5	0	0	0	0	0	0	0	0	0	0	0	0	0	0	0	0
X1534	Chloropicophyceae	Chloropicales	Chloropicaceae	Chloroparvula	Chloroparvula_pacifica	1	2	1	0	1	1	0	0	0	3	2	0	0	1	3	0	1	0	0	0	1	2	0	0	0	1	1	0	2	0	0	0	0	0	0	0	0	0	0	0	0	0	0	0
X2760	Chloropicophyceae	Chloropicales	Chloropicaceae	Chloroparvula	Chloroparvula_pacifica	3	0	0	2	1	1	1	0	0	0	0	0	1	0	0	0	1	1	0	0	0	1	0	0	0	0	0	0	0	0	0	0	0	0	0	0	0	0	0	0	0	0	0	0
X2419	Chloropicophyceae	Chloropicales	Chloropicaceae	Chloropicon	Chloropicon_roscoffensis	7	4	3	5	1	0	0	0	0	1	1	0	2	0	0	0	0	0	0	0	0	0	0	0	0	1	0	0	0	0	0	0	0	1	0	0	0	0	0	0	0	0	0	0
X2878	Choanoflagellatea	Acanthoecida	Acanthoecidae_Group_G	Acanthoecidae_Group_G_X	Acanthoecidae_Group_G_X_sp.	0	0	0	0	0	0	0	0	0	0	0	0	1	0	0	0	0	0	3	0	1	0	0	0	0	0	0	0	0	0	0	1	1	1	2	0	0	1	0	0	0	0	0	0
X1234	Choanoflagellatea	Craspedida	Monosigidae_Group_A	Choanoeca	Choanoeca_perplexa	3	3	0	0	1	1	6	3	0	0	4	1	1	5	0	0	0	0	0	0	1	0	0	0	1	1	2	0	0	0	0	0	0	4	0	0	0	1	0	0	0	0	2	2
X1240	Choanoflagellatea	Craspedida	Monosigidae_Group_A	Codosiga	NA	0	0	0	0	1	0	0	0	0	0	0	0	0	0	0	0	0	0	0	0	0	0	0	0	0	0	0	0	0	0	0	0	0	0	0	0	0	0	0	0	0	0	0	0
X2219	Choanoflagellatea	Craspedida	Monosigidae_Group_A	Codosiga	Codosiga_balthica	0	0	2	3	0	0	0	1	3	2	2	0	3	4	0	2	1	0	0	0	0	0	0	0	0	0	0	1	0	0	0	0	0	0	0	0	0	0	0	1	0	0	0	0
X1684	Choanoflagellatea	Craspedida	Monosigidae_Group_B	Lagenoeca	Lagenoeca_antarctica	0	0	0	0	0	0	0	2	0	3	0	1	1	2	0	0	2	1	0	0	0	0	2	0	0	0	1	0	2	1	0	0	0	3	0	0	0	0	1	0	0	2	0	1
X3011	Choanoflagellatea	Craspedida	Monosigidae_Group_B	Monosigidae_Group_B_X	Monosigidae_Group_B_X_sp.	0	0	2	1	2	0	0	0	1	0	0	0	0	4	2	0	1	1	0	0	0	0	0	0	0	0	0	0	0	0	0	0	0	0	0	0	0	0	0	0	0	0	0	0
X874	Choanoflagellatea	Craspedida	Monosigidae_Group_B	Monosigidae_Group_B_X	Monosigidae_Group_B_X_sp.	0	0	0	2	0	0	0	0	0	0	0	0	0	1	0	0	0	0	5	1	1	1	0	4	0	0	2	22	8	11	36	45	0	53	18	5	1	0	4	1	0	6	1	0
X2768	Choanoflagellatea	Craspedida	Monosigidae_Group_M	Monosigidae_Group_M_X	Monosigidae_Group_M_X_sp.	0	0	0	0	0	0	0	0	1	0	0	0	0	0	0	0	0	0	0	0	0	0	0	0	0	1	0	0	0	0	0	0	0	2	0	0	1	0	0	0	0	0	0	0
X355	Choanoflagellatea	Craspedida	Monosigidae_Group_M	Monosigidae_Group_M_X	Monosigidae_Group_M_X_sp.	44	32	42	52	43	24	47	34	29	72	37	11	36	36	18	7	4	5	32	1	13	24	7	6	5	13	6	29	11	31	20	58	2	109	52	16	28	5	11	6	0	3	0	0
X1356	Choanoflagellatea	Acanthoecida	NA	NA	NA	5	9	7	5	6	1	1	0	0	0	0	0	0	0	0	0	0	0	0	0	0	0	0	0	0	0	0	0	0	0	0	0	0	0	1	0	0	0	2	0	0	0	1	0
X1641	Choanoflagellatea	Acanthoecida	Stephanoecidae_Group_H	NA	NA	1	1	2	3	1	0	2	1	1	0	0	0	0	2	4	1	0	0	2	1	0	3	1	0	0	1	2	3	4	2	1	2	0	5	4	1	0	1	3	1	0	0	0	0
X235	Choanoflagellatea	Acanthoecida	NA	NA	NA	141	133	131	142	52	29	21	15	11	18	4	7	7	17	26	31	40	49	53	7	36	78	39	20	19	25	9	23	14	20	31	105	3	92	64	19	33	20	45	17	6	14	16	8
X2460	Choanoflagellatea	Acanthoecida	NA	NA	NA	0	0	0	0	0	0	0	0	0	0	0	0	0	0	0	0	0	0	0	0	0	0	0	0	0	0	0	0	0	0	0	0	0	0	0	0	0	0	0	0	0	0	0	0
X2656	Choanoflagellatea	Acanthoecida	NA	NA	NA	0	0	0	0	0	0	0	0	0	0	0	0	0	0	0	0	0	0	0	0	0	0	0	0	0	0	0	0	0	0	0	0	0	0	0	0	0	0	0	0	0	0	0	0
X3844	Choanoflagellatea	Acanthoecida	Stephanoecidae_Group_H	NA	NA	0	0	0	0	0	0	0	0	0	0	0	0	0	0	0	0	0	0	0	0	0	0	0	0	0	0	0	0	0	0	0	0	0	0	0	0	0	0	0	0	0	0	0	0
X4448	Choanoflagellatea	Acanthoecida	Stephanoecidae_Group_H	NA	NA	0	0	0	0	0	0	0	0	0	0	0	0	0	0	0	0	0	0	0	0	0	0	0	0	0	0	0	0	0	0	0	0	0	0	0	0	0	0	0	0	0	0	0	0
X480	Choanoflagellatea	Acanthoecida	NA	NA	NA	27	29	47	37	27	18	11	5	10	30	6	2	3	12	5	0	0	1	14	2	3	8	6	1	3	4	2	33	16	36	26	114	4	144	36	8	18	3	3	1	0	2	0	0
X595	Choanoflagellatea	Acanthoecida	NA	NA	NA	0	1	0	6	3	4	2	1	0	5	1	0	3	0	7	7	3	8	4	1	8	21	7	4	3	6	10	21	12	14	10	9	0	14	13	9	6	7	11	15	0	4	6	1
X3739	Choanoflagellatea	Craspedida	NA	NA	NA	0	0	0	0	0	0	0	0	0	0	0	0	0	0	0	0	0	1	0	0	0	0	0	0	0	0	0	0	0	0	0	0	0	0	0	0	0	0	0	0	0	2	0	0
X3952	Choanoflagellatea	Craspedida	Monosigidae_Group_M	NA	NA	0	0	0	0	0	0	0	0	0	0	0	0	0	0	0	0	0	0	0	0	0	0	0	0	0	0	0	0	0	0	0	0	0	0	0	0	0	0	0	0	0	0	0	0
X712	Choanoflagellatea	Craspedida	NA	NA	NA	0	0	4	6	0	9	0	12	8	6	67	1	16	77	2	7	2	7	2	0	0	7	0	0	2	0	2	7	0	10	0	0	1	4	2	3	0	3	0	6	2	0	11	5
X787	Choanoflagellatea	Craspedida	NA	NA	NA	0	0	9	1	0	20	0	5	13	7	51	0	5	147	1	10	1	2	0	0	0	6	0	0	0	0	1	6	0	3	0	0	0	1	5	0	0	0	0	1	0	0	2	4
X1235	Choanoflagellatea	NA	NA	NA	NA	0	0	0	0	0	0	0	0	0	0	0	0	0	0	0	0	0	0	0	0	0	0	0	0	0	0	0	0	0	0	0	0	0	2	0	1	0	0	1	0	0	0	0	0
X1627	Choanoflagellatea	NA	NA	NA	NA	3	1	2	3	3	4	1	1	0	0	0	0	0	1	0	0	0	0	1	0	2	0	0	0	0	0	0	1	0	0	1	8	0	6	4	2	1	1	1	1	0	0	0	2
X1648	Choanoflagellatea	NA	NA	NA	NA	0	0	0	0	0	1	0	0	0	0	0	0	0	0	0	0	0	0	0	0	0	0	0	0	0	0	0	0	0	0	1	0	0	0	0	0	0	0	0	0	0	0	0	0
X2010	Choanoflagellatea	NA	NA	NA	NA	0	0	0	0	0	0	0	0	0	0	0	0	0	0	0	0	0	0	0	0	0	0	0	0	0	0	0	0	0	0	0	0	0	1	0	0	0	0	0	0	0	0	0	0
X2854	Choanoflagellatea	NA	NA	NA	NA	0	0	0	0	0	0	0	0	0	0	0	0	0	0	0	0	0	0	0	0	0	0	0	0	0	0	0	0	0	0	0	0	0	0	0	0	0	0	1	0	0	0	0	0
X3100	Choanoflagellatea	NA	NA	NA	NA	0	0	0	0	0	1	0	0	0	0	0	0	0	0	0	0	1	1	1	0	0	0	0	0	0	0	0	2	1	2	1	2	0	3	1	0	0	0	0	0	0	0	0	0
X3430	Choanoflagellatea	NA	NA	NA	NA	0	0	0	1	0	2	0	0	0	0	0	0	0	0	0	1	0	0	0	0	0	1	0	0	0	0	1	0	0	0	0	0	0	0	3	0	0	1	0	0	0	0	0	0
X999	Choanoflagellatea	NA	NA	NA	NA	0	0	0	0	0	0	0	0	0	0	0	0	0	0	0	0	0	0	0	0	0	0	0	0	0	0	0	0	0	0	0	2	0	0	1	0	1	2	0	1	0	0	0	0
X2138	Choanoflagellatea	Craspedida	Monosigidae_Group_M	Salpingoeca_M	Salpingoeca_tuba	0	0	2	0	0	0	0	0	0	0	2	1	2	12	0	2	0	0	0	0	0	0	0	0	0	0	0	0	0	0	0	0	0	0	0	0	0	0	0	0	0	0	1	0
X3312	Choanoflagellatea	Craspedida	Salpingoecidae_Group_C2	Salpingoecidae_Group_C2_X	Salpingoecidae_Group_C2_X_sp.	3	1	0	0	0	0	1	0	0	0	1	0	0	0	0	0	0	0	0	0	0	0	0	0	0	0	0	0	1	0	0	0	0	0	0	0	0	0	0	0	0	0	0	0
X2246	Choanoflagellatea	Acanthoecida	Acanthoecidae_Group_G	Savillea	Savillea_micropora	0	0	0	1	0	0	1	0	2	0	12	1	1	10	0	0	1	0	0	0	0	0	0	1	1	0	0	1	0	0	0	0	0	0	1	0	0	0	0	0	0	0	0	3
X141	Choanoflagellatea	Acanthoecida	Stephanoecidae_Group_D	Stephanoecidae_Group_D_X	Stephanoecidae_Group_D_X_sp.	107	47	109	143	100	84	69	88	92	257	67	29	65	233	146	134	63	78	460	80	189	505	177	97	133	152	67	89	99	99	92	161	6	311	110	62	45	28	34	30	13	24	21	6
X2104	Choanoflagellatea	Acanthoecida	Stephanoecidae_Group_D	Stephanoecidae_Group_D_X	Stephanoecidae_Group_D_X_sp.	1	3	3	2	0	2	1	0	1	0	1	0	0	1	1	0	0	0	2	0	2	1	0	1	0	0	1	0	0	6	2	3	0	8	1	0	0	0	1	0	0	0	0	0
X39	Choanoflagellatea	Acanthoecida	Stephanoecidae_Group_D	Stephanoecidae_Group_D_X	Stephanoecidae_Group_D_X_sp.	42	60	61	64	33	25	37	19	6	36	18	5	10	24	28	25	17	32	21	12	27	81	37	52	88	169	207	425	505	703	536	917	128	2421	1313	1238	1153	931	1719	903	98	384	180	156
X396	Choanoflagellatea	Acanthoecida	Stephanoecidae_Group_D	Stephanoecidae_Group_D_X	Stephanoecidae_Group_D_X_sp.	25	44	38	45	35	24	14	33	11	51	15	8	11	9	8	4	0	3	16	1	9	11	2	7	3	3	6	40	34	55	37	152	1	251	62	22	38	5	5	1	0	1	0	3
X398	Choanoflagellatea	Acanthoecida	Stephanoecidae_Group_D	Stephanoecidae_Group_D_X	Stephanoecidae_Group_D_X_sp.	0	0	1	0	0	0	0	0	0	0	0	0	0	0	0	0	1	0	0	0	0	0	0	0	0	0	0	0	0	0	0	0	0	0	0	0	0	0	0	0	0	0	0	0
X4456	Choanoflagellatea	Acanthoecida	Stephanoecidae_Group_D	Stephanoecidae_Group_D_X	Stephanoecidae_Group_D_X_sp.	0	0	0	0	0	0	0	0	0	0	0	0	0	0	0	0	0	0	0	0	0	0	0	0	0	0	0	0	0	0	0	0	0	0	0	0	0	0	0	0	0	0	0	0
X50	Choanoflagellatea	Acanthoecida	Stephanoecidae_Group_D	Stephanoecidae_Group_D_X	Stephanoecidae_Group_D_X_sp.	40	33	69	200	126	89	109	56	32	50	13	9	12	37	66	351	437	554	332	51	281	512	229	63	98	107	116	92	80	161	73	74	3	186	78	118	56	133	256	250	107	679	410	466
X528	Choanoflagellatea	Acanthoecida	Stephanoecidae_Group_D	Stephanoecidae_Group_D_X	Stephanoecidae_Group_D_X_sp.	20	13	9	22	16	13	26	13	27	29	10	1	13	13	6	5	0	4	14	1	10	9	3	3	1	6	2	20	7	24	14	75	0	91	23	12	19	2	1	0	0	0	2	0
X926	Choanoflagellatea	Acanthoecida	Stephanoecidae_Group_D	Stephanoecidae_Group_D_X	Stephanoecidae_Group_D_X_sp.	0	0	0	0	0	1	0	0	0	0	0	0	0	0	0	0	0	1	1	0	0	1	0	0	0	2	0	0	3	0	2	1	0	0	1	0	0	1	3	5	0	0	1	0
X1457	Choanoflagellatea	Acanthoecida	Stephanoecidae_Group_E	Stephanoecidae_Group_E_X	Stephanoecidae_Group_E_X_sp.	0	2	0	0	1	0	0	0	0	0	0	0	0	1	0	0	0	0	19	1	3	0	2	1	0	0	2	11	1	7	5	5	0	6	3	2	0	1	3	0	4	3	0	3
X1799	Choanoflagellatea	Acanthoecida	Stephanoecidae_Group_E	Stephanoecidae_Group_E_X	Stephanoecidae_Group_E_X_sp.	0	0	1	2	1	1	0	0	0	0	1	0	1	2	4	4	7	8	1	0	2	14	0	5	1	4	1	0	2	0	0	0	0	2	1	0	2	0	0	1	0	1	0	0
X496	Choanoflagellatea	Acanthoecida	Stephanoecidae_Group_E	Stephanoecidae_Group_E_X	Stephanoecidae_Group_E_X_sp.	16	27	16	42	16	12	16	10	7	24	3	8	17	19	26	53	29	41	34	2	12	66	14	33	26	21	18	23	19	29	26	29	0	40	15	9	7	7	6	6	0	1	3	3
X1284	Choanoflagellatea	Acanthoecida	Stephanoecidae_Group_H	Stephanoecidae_Group_H_X	Stephanoecidae_Group_H_X_sp.	0	0	0	1	0	0	0	0	0	0	0	0	0	0	0	0	0	0	0	0	0	1	0	0	0	0	0	0	0	0	0	0	0	0	0	0	0	0	0	0	0	0	0	0
X1290	Choanoflagellatea	Acanthoecida	Stephanoecidae_Group_H	Stephanoecidae_Group_H_X	Stephanoecidae_Group_H_X_sp.	0	0	1	0	0	0	0	0	0	0	0	0	0	0	0	0	0	0	0	0	1	1	0	0	0	1	1	4	6	6	2	0	0	6	3	11	0	1	2	8	0	7	1	1
X1470	Choanoflagellatea	Acanthoecida	Stephanoecidae_Group_H	Stephanoecidae_Group_H_X	Stephanoecidae_Group_H_X_sp.	0	0	0	0	0	0	0	0	0	0	0	0	0	0	0	0	0	0	0	0	0	0	0	0	0	0	2	3	3	7	1	0	0	1	3	15	2	0	2	2	2	6	2	0
X200	Choanoflagellatea	Acanthoecida	Stephanoecidae_Group_H	Stephanoecidae_Group_H_X	Stephanoecidae_Group_H_X_sp.	13	8	3	14	9	2	3	5	1	4	3	0	3	1	8	2	0	3	1	0	4	8	6	2	3	6	10	15	7	7	13	9	0	35	20	25	37	27	63	45	1	4	4	2
X2243	Choanoflagellatea	Acanthoecida	Stephanoecidae_Group_H	Stephanoecidae_Group_H_X	Stephanoecidae_Group_H_X_sp.	1	0	0	5	2	1	3	0	1	3	0	0	1	5	1	0	1	0	2	0	0	0	0	1	0	1	1	0	0	2	0	2	0	1	1	0	0	0	1	0	0	0	0	0
X326	Choanoflagellatea	Acanthoecida	Stephanoecidae_Group_H	Stephanoecidae_Group_H_X	Stephanoecidae_Group_H_X_sp.	0	0	1	0	0	0	0	0	0	0	0	0	0	0	0	0	0	2	0	1	0	2	1	0	1	9	33	109	171	136	44	18	5	108	64	288	21	22	34	95	126	64	17	17
X811	Choanoflagellatea	Acanthoecida	Stephanoecidae_Group_H	Stephanoecidae_Group_H_X	Stephanoecidae_Group_H_X_sp.	0	1	0	0	0	0	0	0	0	1	0	1	1	0	1	0	1	3	1	0	3	2	1	2	0	1	1	1	0	1	0	1	0	5	3	0	2	0	5	6	0	1	0	1
X893	Choanoflagellatea	Acanthoecida	Stephanoecidae_Group_H	Stephanoecidae_Group_H_X	Stephanoecidae_Group_H_X_sp.	0	0	2	1	0	0	0	0	0	1	0	0	0	1	0	3	0	2	1	0	0	3	3	0	2	0	1	1	0	3	6	38	1	25	15	15	15	6	14	20	5	11	10	2
X1480	Choanoflagellatea	Acanthoecida	Stephanoecidae_New_Choanos_8	Stephanoecidae_New_Choanos_8_X	Stephanoecidae_New_Choanos_8_X_sp.	0	0	1	0	1	0	0	0	0	0	0	0	1	0	0	2	0	2	0	0	0	1	0	0	1	0	1	1	1	5	0	0	0	7	2	2	3	0	1	0	0	0	0	0
X1767	Choanoflagellatea	Acanthoecida	Stephanoecidae_New_Choanos_8	Stephanoecidae_New_Choanos_8_X	Stephanoecidae_New_Choanos_8_X_sp.	0	0	0	0	0	0	0	0	0	1	0	1	0	0	4	1	4	2	0	1	1	2	0	0	0	0	1	0	0	1	1	1	0	2	4	0	1	1	0	0	0	0	0	0
X427	Choanoflagellatea	Acanthoecida	Stephanoecidae_New_Choanos_8	Stephanoecidae_New_Choanos_8_X	Stephanoecidae_New_Choanos_8_X_sp.	0	1	0	5	2	2	3	5	0	12	2	3	2	5	8	12	5	5	7	0	6	13	4	6	9	4	7	13	12	29	30	51	1	130	45	12	36	21	34	16	0	6	4	2
X967	Chrysophyceae	Chrysophyceae_X	Chrysophyceae_Clade-F	Chrysophyceae_Clade-F_X	Chrysophyceae_Clade-F_X_sp.	0	0	0	0	0	0	0	0	0	0	0	0	0	0	0	0	0	0	0	0	0	0	0	0	0	0	0	0	0	0	0	0	0	0	0	0	0	0	0	0	0	0	0	0
X1689	Chrysophyceae	Chrysophyceae_X	Chrysophyceae_Clade-G	Chrysophyceae_Clade-G_X	Chrysophyceae_Clade-G_X_sp.	0	0	0	1	1	1	0	0	1	0	0	0	0	0	0	0	0	0	0	0	0	0	0	0	0	0	0	3	0	1	1	0	0	0	0	0	0	0	0	0	0	0	0	0
X971	Chrysophyceae	Chrysophyceae_X	Chrysophyceae_Clade-G	Chrysophyceae_Clade-G_X	Chrysophyceae_Clade-G_X_sp.	15	11	13	14	19	6	3	0	1	0	2	0	1	4	6	2	0	0	2	0	4	6	2	2	1	6	1	4	4	17	7	20	0	7	1	1	3	1	7	0	0	0	0	0
X1192	Chrysophyceae	Chrysophyceae_X	Chrysophyceae_Clade-H	Chrysophyceae_Clade-H_X	Chrysophyceae_Clade-H_X_sp.	1	1	2	0	2	3	0	0	1	0	0	0	0	6	2	2	0	0	8	0	5	7	0	1	1	5	0	7	1	21	3	3	0	4	0	0	1	0	0	0	0	1	0	3
X1218	Chrysophyceae	Chrysophyceae_X	Chrysophyceae_Clade-H	Chrysophyceae_Clade-H_X	Chrysophyceae_Clade-H_X_sp.	0	0	1	0	0	1	2	0	0	0	0	0	1	0	0	0	0	0	1	0	0	0	0	0	0	0	0	6	0	4	0	4	0	3	8	1	51	3	10	2	0	1	0	1
X1307	Chrysophyceae	Chrysophyceae_X	Chrysophyceae_Clade-H	Chrysophyceae_Clade-H_X	Chrysophyceae_Clade-H_X_sp.	1	0	4	3	5	4	4	1	0	0	0	0	0	5	1	0	0	0	9	0	2	4	2	1	1	3	1	25	5	26	2	0	0	0	2	0	3	0	0	0	0	0	0	0
X1611	Chrysophyceae	Chrysophyceae_X	Chrysophyceae_Clade-H	Chrysophyceae_Clade-H_X	Chrysophyceae_Clade-H_X_sp.	1	0	0	0	0	0	0	0	0	0	0	0	0	0	0	0	0	0	1	0	0	0	0	0	0	1	0	3	3	4	0	0	0	1	0	0	1	0	1	0	0	0	0	0
X2368	Chrysophyceae	Chrysophyceae_X	Chrysophyceae_Clade-H	Chrysophyceae_Clade-H_X	Chrysophyceae_Clade-H_X_sp.	0	0	0	2	1	0	1	0	1	2	0	0	0	0	0	0	0	0	0	0	0	0	0	0	0	1	0	0	1	2	0	9	1	10	2	0	3	1	1	0	0	0	0	0
X3140	Chrysophyceae	Chrysophyceae_X	Chrysophyceae_Clade-H	Chrysophyceae_Clade-H_X	Chrysophyceae_Clade-H_X_sp.	0	0	4	0	0	0	0	0	0	1	1	1	1	1	3	2	0	0	0	0	0	0	0	0	0	0	0	1	0	0	0	0	0	0	0	0	0	0	0	0	0	0	0	0
X3659	Chrysophyceae	Chrysophyceae_X	Chrysophyceae_Clade-H	Chrysophyceae_Clade-H_X	Chrysophyceae_Clade-H_X_sp.	0	1	0	0	0	0	1	0	0	0	0	0	0	0	0	0	0	0	0	0	0	0	0	0	0	0	0	0	0	0	0	0	0	0	0	0	0	0	0	0	0	0	0	0
X587	Chrysophyceae	Chrysophyceae_X	Chrysophyceae_Clade-H	Chrysophyceae_Clade-H_X	Chrysophyceae_Clade-H_X_sp.	36	37	43	33	22	11	3	1	1	1	1	0	0	1	1	0	1	4	14	1	7	30	6	5	7	24	34	48	24	52	24	22	0	43	6	4	0	1	2	1	1	2	2	1
X660	Chrysophyceae	Chrysophyceae_X	Chrysophyceae_Clade-H	Chrysophyceae_Clade-H_X	Chrysophyceae_Clade-H_X_sp.	46	33	55	47	37	20	19	8	5	4	3	1	3	12	5	1	2	1	6	0	4	9	3	2	1	6	6	17	6	37	1	8	0	0	1	0	3	0	0	0	0	1	0	1
X806	Chrysophyceae	Chrysophyceae_X	Chrysophyceae_Clade-H	Chrysophyceae_Clade-H_X	Chrysophyceae_Clade-H_X_sp.	38	27	46	32	16	18	17	1	6	10	3	1	3	4	5	0	0	0	15	0	6	9	2	4	2	4	0	13	2	6	1	6	0	4	0	0	0	0	0	0	0	0	0	0
X875	Chrysophyceae	Chrysophyceae_X	Chrysophyceae_Clade-H	Chrysophyceae_Clade-H_X	Chrysophyceae_Clade-H_X_sp.	23	19	22	31	29	21	13	9	3	8	2	0	1	2	1	0	0	0	8	0	5	4	2	2	3	2	3	4	8	18	0	6	0	4	0	0	1	0	0	0	0	0	0	0
X3045	Chrysophyceae	Chrysophyceae_X	Chrysophyceae_Clade-I	Chrysophyceae_Clade-I_X	Chrysophyceae_Clade-I_X_sp.	0	2	1	2	2	1	0	0	0	0	0	0	0	2	1	0	0	0	0	0	0	0	0	0	0	0	0	0	0	0	0	0	0	0	0	0	0	0	0	0	0	0	0	0
X3753	Chrysophyceae	Chrysophyceae_X	Chrysophyceae_Clade-I	Chrysophyceae_Clade-I_X	Chrysophyceae_Clade-I_X_sp.	0	0	0	0	0	0	0	0	0	0	0	0	0	0	0	0	0	0	0	0	0	0	0	0	0	0	0	0	0	0	0	0	0	0	0	0	0	0	0	0	0	0	0	0
X757	Chrysophyceae	Chrysophyceae_X	Chrysophyceae_Clade-I	Chrysophyceae_Clade-I_X	Chrysophyceae_Clade-I_X_sp.	7	5	14	11	10	5	3	5	1	1	1	0	2	0	0	0	0	1	6	1	2	8	7	2	4	9	13	45	13	66	6	4	0	8	1	1	1	1	1	0	0	3	0	0
X993	Chrysophyceae	Chrysophyceae_X	Chrysophyceae_Clade-I	Chrysophyceae_Clade-I_X	Chrysophyceae_Clade-I_X_sp.	3	8	7	14	2	3	2	3	1	8	1	0	2	6	1	0	0	0	9	0	0	4	0	3	0	3	1	8	3	17	3	10	1	15	2	0	2	0	1	0	0	1	1	1
X2816	Chrysophyceae	Chrysophyceae_X	Chrysophyceae_XX	Chrysophyceae_XXX	Chrysophyceae_XXX_sp.	0	0	0	0	0	0	0	0	0	0	0	0	0	0	0	0	0	0	0	0	0	0	0	0	0	0	0	0	0	0	0	0	0	0	0	0	0	0	0	0	0	0	0	0
X2177	Chrysophyceae	Chrysophyceae_X	Chrysophyceae_Clade-F	Clathromonas	Clathromonas_butcheri	3	4	0	0	2	1	4	1	0	0	0	0	0	0	0	1	0	0	0	0	0	0	0	0	0	0	0	0	2	0	0	0	0	0	0	0	0	0	0	0	0	1	0	0
X562	Chrysophyceae	Chrysophyceae_X	Chrysophyceae_Clade-F	Clathromonas	Clathromonas_butcheri	36	45	3	3	3	1	59	0	1	1	5	0	3	13	4	1	1	1	0	0	0	2	1	8	1	7	1	2	9	5	0	0	0	0	0	1	0	0	1	1	1	4	0	1
X1285	Chrysophyceae	Chrysophyceae_X	Chrysophyceae_Clade-C	Dinobryon	Dinobryon_pediforme	4	0	0	0	0	0	15	1	6	0	10	0	1	6	0	8	0	5	0	0	2	2	2	2	0	5	1	8	1	8	0	5	0	5	0	0	0	2	0	1	0	2	0	1
X1543	Chrysophyceae	Chrysophyceae_X	NA	NA	NA	12	19	0	0	0	0	20	1	6	0	1	0	0	1	0	1	0	0	0	0	0	1	0	1	0	0	0	0	0	0	0	0	0	0	0	0	0	1	0	1	0	1	0	0
X1737	Chrysophyceae	Chrysophyceae_X	NA	NA	NA	0	1	0	0	0	0	0	1	0	2	2	0	0	5	0	2	0	0	0	0	0	0	0	0	0	0	0	1	0	1	0	0	0	5	2	1	0	0	1	0	0	1	1	0
X2025	Chrysophyceae	Chrysophyceae_X	NA	NA	NA	0	0	0	0	0	0	4	0	9	0	2	0	0	1	1	2	0	3	2	0	0	17	0	4	0	0	0	0	1	1	0	0	0	0	0	0	0	0	0	0	0	0	0	0
X2146	Chrysophyceae	Chrysophyceae_X	NA	NA	NA	6	10	12	6	4	1	0	0	1	0	1	0	0	0	0	0	0	0	2	0	0	2	0	0	0	0	0	2	1	3	0	0	0	0	0	0	0	0	0	0	0	0	0	0
X2663	Chrysophyceae	Chrysophyceae_X	NA	NA	NA	1	0	2	2	0	0	0	0	0	0	0	0	0	0	0	0	0	0	0	0	0	1	0	0	0	0	0	11	3	4	1	0	0	0	1	0	0	0	0	0	0	0	0	0
X3197	Chrysophyceae	Chrysophyceae_X	NA	NA	NA	0	0	0	0	0	0	0	0	0	0	0	0	0	6	0	0	0	0	1	0	0	0	0	0	0	0	0	3	0	0	0	0	0	0	1	0	0	0	0	0	3	0	2	0
X3438	Chrysophyceae	Chrysophyceae_X	NA	NA	NA	0	1	0	0	0	0	1	0	0	0	0	0	0	0	0	0	0	0	0	0	0	0	0	0	0	0	0	0	0	0	0	0	0	0	1	0	0	0	0	0	0	0	0	0
X3492	Chrysophyceae	Chrysophyceae_X	NA	NA	NA	0	0	0	0	0	1	3	0	1	0	0	0	0	0	0	0	0	0	0	0	0	0	0	0	0	0	0	0	0	0	0	0	0	0	0	0	0	0	0	0	0	0	0	0
X571	Chrysophyceae	Chrysophyceae_X	NA	NA	NA	4	4	3	8	3	5	6	4	4	9	2	0	7	1	3	3	1	3	8	0	1	9	1	0	3	8	6	39	10	63	16	69	2	81	18	7	64	14	23	5	0	1	0	1
X585	Chrysophyceae	Chrysophyceae_X	NA	NA	NA	9	9	7	7	4	3	3	0	7	3	3	0	0	5	2	2	0	1	5	0	4	7	0	2	4	4	7	108	30	123	39	83	1	82	26	7	6	1	0	0	0	1	0	1
X728	Chrysophyceae	Chrysophyceae_X	NA	NA	NA	0	0	1	1	1	1	1	1	0	0	0	0	0	0	0	0	1	1	0	0	0	0	0	1	0	0	0	0	0	1	0	0	0	1	0	1	2	0	1	0	0	0	0	0
X426	Chrysophyceae	Chrysophyceae_X	Chrysophyceae_Clade-F	Paraphysomonas	Paraphysomonas_imperforata	8	17	3	5	1	6	42	5	1	5	2	1	2	16	3	3	1	0	0	1	2	3	5	60	0	10	3	57	28	10	19	42	2	243	71	29	79	11	37	19	23	12	1	3
X645	Chrysophyceae	Chrysophyceae_X	Chrysophyceae_Clade-F	Paraphysomonas	Paraphysomonas_sp.	61	74	0	0	0	0	164	0	0	0	2	0	0	5	0	0	0	0	0	0	0	0	0	0	0	0	0	1	0	0	0	0	0	0	0	0	0	0	0	0	2	0	0	0
X1328	Chrysophyceae	Chrysophyceae_X	Chrysophyceae_Clade-C	Spumella	Spumella_elongata	2	2	0	0	0	0	5	0	0	0	0	0	0	1	1	0	0	0	0	0	0	1	0	4	2	0	0	0	54	1	13	0	0	0	0	2	2	0	0	0	0	10	0	0
X2069	Chrysophyceae	Chrysophyceae_X	Chrysophyceae_Clade-C	Spumella	Spumella_elongata	0	0	0	1	0	0	0	0	1	4	0	0	0	10	0	1	1	0	0	0	0	2	0	0	0	0	0	5	0	0	0	1	0	0	0	0	0	1	0	0	0	0	0	0
X2240	Chytridiomycota	Chytridiomycotina	Chytridiomycetes	Chytridiomycetes_X	Chytridiomycetes_X_sp.	2	2	0	2	0	0	0	0	0	0	0	0	0	0	0	0	0	0	2	4	5	4	0	0	0	2	3	0	0	0	0	0	0	0	0	0	0	0	0	0	0	0	0	1
X2531	Chytridiomycota	Chytridiomycotina	Chytridiomycetes	Chytridiomycetes_X	Chytridiomycetes_X_sp.	0	0	0	0	0	0	0	0	0	0	0	0	0	0	0	0	0	0	0	0	0	0	0	0	0	0	0	0	0	0	0	0	0	0	0	0	0	0	0	0	0	0	0	0
X316	Chytridiomycota	Chytridiomycotina	Chytridiomycetes	Chytridiomycetes_X	Chytridiomycetes_X_sp.	2	0	0	0	1	1	0	0	0	0	0	0	0	0	0	0	0	0	0	0	0	0	0	0	0	0	0	0	0	0	0	0	0	0	2	0	0	0	0	0	0	0	0	0
X3190	Chytridiomycota	Chytridiomycotina	Chytridiomycetes	Chytridiomycetes_X	Chytridiomycetes_X_sp.	0	0	0	0	0	0	0	0	0	0	0	0	0	0	0	0	0	0	0	0	1	0	0	0	0	0	0	0	0	1	0	0	0	0	0	0	0	0	0	0	0	0	1	0
X1212	Chytridiomycota	Chytridiomycotina	Chytridiomycotina_X	Chytridiomycotina_XX	Chytridiomycotina_XX_sp.	2	2	1	5	4	1	2	2	6	9	1	1	1	2	0	2	0	2	2	2	4	2	5	1	1	0	1	0	0	2	0	1	0	2	1	1	0	0	0	0	0	1	0	0
X1902	Chytridiomycota	Chytridiomycotina	Monoblepharidomycetes	Monoblepharidales_X	Monoblepharidales_X_sp.	0	0	2	1	0	0	0	0	0	0	0	0	0	3	0	0	0	0	0	0	0	0	0	0	0	1	0	0	0	0	0	0	0	0	0	0	0	0	0	0	0	0	0	0
X1045	Chytridiomycota	Chytridiomycotina	Chytridiomycetes	NA	NA	1	1	1	3	0	1	6	0	0	0	0	0	0	0	0	0	0	1	1	1	0	2	2	0	2	0	0	0	0	0	0	0	1	0	0	0	0	0	0	0	0	0	0	0
X3285	Chytridiomycota	Chytridiomycotina	Chytridiomycetes	NA	NA	0	0	0	1	0	0	0	0	0	0	0	0	0	0	0	0	0	0	0	0	0	0	0	0	0	0	0	0	0	0	0	0	0	0	0	0	0	0	0	0	0	0	0	0
X3291	Chytridiomycota	Chytridiomycotina	Chytridiomycetes	NA	NA	0	0	0	0	0	0	0	0	0	0	0	0	0	0	0	0	0	0	0	0	0	0	0	0	0	0	0	0	0	0	0	0	0	0	0	0	0	0	0	0	0	0	0	0
X3631	Chytridiomycota	Chytridiomycotina	Chytridiomycetes	NA	NA	0	0	0	0	0	0	0	0	0	0	0	0	0	0	0	0	0	0	0	0	0	0	0	0	0	0	0	0	0	0	0	0	0	1	0	0	0	0	0	0	0	0	0	0
X3632	Chytridiomycota	Chytridiomycotina	Chytridiomycetes	NA	NA	0	0	0	0	0	0	0	0	0	0	0	0	0	0	0	0	0	0	0	0	0	0	0	0	0	0	0	0	0	0	0	0	0	0	0	1	0	0	0	0	0	0	0	0
X3671	Chytridiomycota	Chytridiomycotina	NA	NA	NA	0	0	1	0	0	0	0	0	0	0	0	0	0	1	0	1	0	0	0	0	0	0	0	0	0	0	0	0	0	0	0	0	0	0	0	0	0	0	0	0	0	0	0	0
X3989	Chytridiomycota	Chytridiomycotina	Chytridiomycetes	NA	NA	0	0	0	0	0	0	0	0	0	0	0	0	0	0	0	0	2	0	0	0	0	0	0	0	0	0	0	0	0	0	0	0	0	0	0	0	0	0	0	0	0	0	0	0
X2504	Chytridiomycota	Chytridiomycotina	Chytridiomycetes	Rhyzophidiales	Rhyzophidiales_sp.	1	1	0	2	0	2	0	0	1	2	1	0	0	0	0	0	0	0	1	0	0	0	0	0	0	0	0	0	0	0	0	0	0	0	0	0	0	0	0	0	0	0	0	0
X699	Chytridiomycota	Chytridiomycotina	Chytridiomycetes	Rhyzophidiales	Rhyzophidiales_sp.	19	18	33	30	18	18	19	7	13	64	12	4	12	28	1	0	0	0	50	1	12	23	5	1	1	1	5	5	2	9	0	0	0	0	0	0	0	0	0	0	0	0	0	0
X345	Chytridiomycota	Chytridiomycotina	Chytridiomycetes	Spizellomycetales-and-Rhizophlyctidales	Spizellomycetales-and-Rhizophlyctidales_sp.	0	0	0	0	0	0	1	0	0	0	0	0	0	0	0	0	0	2	0	0	0	2	2	0	0	0	6	21	14	11	5	22	0	33	11	18	24	24	43	7	0	6	5	2
X3798	Ciliophora_X	Ciliophora_XX	Ciliophora_XXX	Mesodinium	Mesodinium_rubrum	0	0	0	0	0	0	0	0	0	0	0	0	0	0	0	0	1	0	0	0	0	1	0	0	0	0	0	0	0	0	0	0	0	0	0	0	0	0	0	0	0	0	0	0
X2584	Ciliophora_X	Ciliophora_XX	Protocruziidae	Protocruzia	NA	0	0	0	6	0	0	0	0	0	0	7	2	0	8	0	0	0	0	0	0	0	0	0	0	0	0	0	0	0	1	0	0	0	0	0	0	0	0	0	0	0	0	0	0
X2488	Cnidaria	Cnidaria_X	Hydrozoa	Aglaura	Aglaura_hemistoma	0	2	0	0	0	0	0	0	0	0	0	0	0	0	0	0	0	0	0	0	0	0	0	0	0	0	0	0	0	0	0	0	0	0	0	0	0	0	0	0	0	0	0	0
X354	Cnidaria	Cnidaria_X	Hydrozoa	Aglaura	Aglaura_hemistoma	0	0	0	0	0	0	0	0	0	0	0	0	0	0	0	0	0	0	0	0	0	0	0	0	0	0	0	0	0	0	0	0	0	0	0	0	0	0	0	0	4	0	4	0
X778	Cnidaria	Cnidaria_X	Anthozoa	Alaskagorgia	Alaskagorgia_aleutiana	19	4	3	6	7	7	1	7	5	17	2	0	3	5	0	11	3	6	2	0	10	2	0	0	0	1	3	0	2	2	0	0	0	0	0	2	0	0	1	0	0	0	0	1
X1865	Cnidaria	Cnidaria_X	Scyphozoa	Aurelia	Aurelia_aurita	0	0	0	0	0	0	0	0	0	0	0	0	0	0	0	0	0	0	0	0	0	0	0	0	0	11	0	0	0	0	0	0	0	0	0	0	0	0	0	0	0	4	0	0
X1387	Cnidaria	Cnidaria_X	Hydrozoa	Bougainvillia	Bougainvillia_sp.	1	0	0	0	0	0	0	0	0	5	0	0	0	0	0	0	0	0	0	1	0	0	5	1	0	3	3	3	0	12	0	0	0	0	1	0	1	0	0	1	0	3	1	1
X1906	Cnidaria	Cnidaria_X	Hydrozoa	Calycella	Calycella_syringa	0	0	0	0	0	0	0	0	0	0	0	0	0	0	0	0	0	0	0	0	0	0	0	0	0	0	0	0	1	0	0	0	0	0	0	2	0	0	2	0	0	0	0	1
X731	Cnidaria	Cnidaria_X	Anthozoa	Ceriantheopsis	Ceriantheopsis_americana	2	1	18	16	9	9	2	1	0	3	1	0	0	3	2	1	0	259	0	0	0	0	0	2	0	0	0	0	8	0	0	0	0	0	0	0	0	0	0	0	0	0	0	0
X591	Cnidaria	Cnidaria_X	Hydrozoa	Clytia	Clytia_sp.	0	0	0	0	0	0	0	0	2	0	0	0	0	0	0	0	0	0	0	0	0	0	1	0	0	0	16	297	4	0	2	0	0	0	63	0	0	13	1	3	0	3	5	7
X88	Cnidaria	Cnidaria_X	Hydrozoa	Clytia	Clytia_sp.	0	2	0	0	0	1	1	1	0	0	0	0	0	0	0	0	0	0	0	0	0	0	0	0	0	0	0	3	2	1	0	0	0	0	31	0	0	0	1	0	0	0	0	6
X929	Cnidaria	Cnidaria_X	Hydrozoa	Clytia	NA	0	0	0	0	0	0	0	0	0	0	0	0	0	0	0	0	0	0	0	0	0	0	0	0	0	0	0	0	0	0	0	0	0	0	0	0	0	0	0	0	0	0	0	0
X3404	Cnidaria	Cnidaria_X	Hydrozoa	Coryne	Coryne_muscoides	0	0	0	0	0	0	0	0	0	0	0	0	0	1	1	0	0	0	0	0	0	0	0	0	0	0	0	0	0	0	0	0	0	0	0	0	0	0	0	0	0	0	0	0
X1964	Cnidaria	Cnidaria_X	Scyphozoa	Cyanea	Cyanea_lamarckii	0	0	0	0	0	0	0	0	0	0	0	0	0	0	0	0	0	0	0	0	0	0	0	0	0	2	0	1	1	0	17	0	0	0	0	0	0	0	0	0	0	1	0	0
X3194	Cnidaria	Cnidaria_X	Scyphozoa	Cyanea	Cyanea_lamarckii	0	0	0	0	0	0	0	0	0	0	0	0	0	0	0	0	0	0	0	0	0	0	0	0	0	0	0	0	0	0	4	0	0	0	0	0	0	0	1	0	0	0	0	0
X82	Cnidaria	Cnidaria_X	Scyphozoa	Cyanea	Cyanea_lamarckii	1	1	0	625	1	0	7	2	1	1	1	1	2	2	0	3	0	0	6	0	2	0	59	43	3	584	0	109	117	8	8768	21	0	27	24	10	27	4	124	2	46	33	7	85
X1190	Cnidaria	Cnidaria_X	Anthozoa	Diadumene	Diadumene_sp.	4	0	3	3	1	3	3	8	2	2	4	0	1	5	2	0	0	0	0	0	1	2	0	0	1	0	0	2	0	1	0	3	0	2	0	0	0	0	0	1	2	4	0	2
X1791	Cnidaria	Cnidaria_X	Anthozoa	Diadumene	Diadumene_sp.	0	0	6	0	1	0	1	4	0	0	2	0	1	5	1	0	0	2	4	0	0	0	0	1	0	0	0	3	0	0	0	0	0	0	0	0	0	0	0	0	1	0	0	0
X450	Cnidaria	Cnidaria_X	Anthozoa	Diadumene	Diadumene_sp.	1	0	3	0	7	1	0	5	1	3	3	0	2	4	3	3	1	2	3	0	1	0	5	0	0	0	0	7	4	5	0	0	0	0	0	0	1	0	1	0	0	0	7	1
X1182	Cnidaria	Cnidaria_X	Hydrozoa	Diphasia	Diphasia_fallax	0	0	0	0	0	0	2	0	0	0	0	0	0	0	0	2	1	0	1	0	0	0	0	0	0	0	1	6	0	1	1	1	0	5	6	0	0	0	0	3	3	3	1	1
X2496	Cnidaria	Cnidaria_X	Hydrozoa	Ectopleura	NA	0	0	0	0	0	0	0	0	0	0	0	0	0	0	0	2	0	0	0	0	0	0	0	0	0	0	0	1	0	0	0	0	0	0	0	0	0	0	1	0	0	0	0	1
X1443	Cnidaria	Cnidaria_X	Anthozoa	Edwardsiella	Edwardsiella_lineata	0	1	11	0	0	0	0	2	0	0	0	0	1	0	1	4	0	10	1	0	0	0	0	0	1	0	0	28	1	0	0	0	0	0	0	0	0	0	0	0	0	11	1	0
X1537	Cnidaria	Cnidaria_X	Anthozoa	Edwardsiella	Edwardsiella_lineata	0	0	9	0	0	0	0	1	1	0	0	0	0	2	0	0	0	1	0	0	0	0	0	0	0	0	0	11	2	0	0	0	0	1	0	0	0	0	0	0	0	2	0	0
X193	Cnidaria	Cnidaria_X	Anthozoa	Edwardsiella	Edwardsiella_lineata	2	1	191	5	3	16	12	14	1	0	7	1	30	4	4	4	1	64	13	0	0	1	2	0	0	6	0	951	25	4	9	3	0	1	2	0	0	2	1	2	15	211	6	18
X4429	Cnidaria	Cnidaria_X	Anthozoa	Edwardsiella	Edwardsiella_lineata	0	0	0	0	0	0	0	0	0	0	0	0	0	0	0	0	0	0	0	0	0	0	0	0	0	0	0	0	0	0	0	0	0	0	0	0	0	0	0	0	0	0	0	0
X2330	Cnidaria	Cnidaria_X	Hydrozoa	Gonothyraea	Gonothyraea_loveni	0	2	0	0	0	0	1	0	0	0	0	0	0	1	0	0	2	0	0	0	0	0	1	0	0	0	0	0	0	1	0	10	0	0	1	0	0	0	1	4	3	1	0	0
X3195	Cnidaria	Cnidaria_X	Hydrozoa	Halecium	Halecium_beanii	0	0	0	0	0	0	0	0	0	0	0	0	0	0	0	4	0	0	0	0	1	0	0	0	0	0	0	6	3	0	0	0	0	0	0	0	0	0	0	0	0	1	0	0
X3666	Cnidaria	Cnidaria_X	Hydrozoa	Halecium	Halecium_beanii	0	0	0	0	0	0	2	0	0	0	0	0	0	0	0	0	0	0	0	0	0	0	0	0	0	1	0	0	0	1	0	0	0	0	0	0	0	0	0	0	0	1	0	0
X908	Cnidaria	Cnidaria_X	Hydrozoa	Halecium	Halecium_labrosum	1	2	0	0	0	0	0	0	0	0	0	0	0	0	0	0	1	0	3	0	0	0	0	0	0	0	0	0	3	1	1	0	0	0	0	2	0	0	2	1	2	0	0	0
X3843	Cnidaria	Cnidaria_X	Hydrozoa	Laomedea	Laomedea_flexuosa	0	0	0	0	0	0	0	0	0	0	0	0	0	0	0	0	0	0	0	0	0	0	0	0	0	0	0	0	0	3	0	0	0	0	0	0	0	0	1	0	0	0	0	0
X1406	Cnidaria	Cnidaria_X	Hydrozoa	NA	NA	0	0	0	0	0	0	1	0	1	1	0	0	0	0	1	0	0	0	0	0	3	4	1	0	5	3	4	0	1	3	1	1	1	1	1	1	0	0	3	0	0	2	0	0
X1472	Cnidaria	Cnidaria_X	Anthozoa	NA	NA	1	0	0	0	0	1	0	1	0	0	0	1	0	0	0	2	0	1	0	0	0	0	0	0	0	0	0	0	0	0	0	0	0	0	0	0	0	0	0	0	0	0	0	0
X1599	Cnidaria	Cnidaria_X	Hydrozoa	NA	NA	1	0	1	2	0	1	0	0	0	1	0	0	0	0	0	0	0	0	1	0	5	14	1	0	3	4	2	0	2	2	0	0	0	1	1	0	0	0	2	0	0	3	0	0
X1922	Cnidaria	Cnidaria_X	Hydrozoa	NA	NA	0	0	0	0	0	0	0	0	0	0	0	0	0	0	1	0	0	69	0	0	0	1	0	0	0	0	0	0	0	0	0	0	0	0	0	0	1	0	0	0	0	1	0	0
X2494	Cnidaria	Cnidaria_X	Anthozoa	NA	NA	0	0	0	0	0	0	0	1	0	0	0	0	0	1	0	0	0	0	0	0	0	0	0	0	0	0	0	0	1	0	0	0	0	0	0	0	0	0	0	0	0	9	0	0
X29	Cnidaria	Cnidaria_X	Hydrozoa	NA	NA	3	7	1321	39	34	9702	7	4103	557	249	43	5	385	1838	72	62	6	4000	338	12	14	59	17	50	83	124	53	1682	12	75	78	227	7	1239	54	4039	1	573	9	94	3495	13	6735	4060
X3022	Cnidaria	Cnidaria_X	Hydrozoa	NA	NA	0	0	1	0	0	6	0	1	0	0	0	0	2	0	0	0	0	2	0	0	0	0	0	0	0	0	0	0	0	0	0	0	0	1	0	3	0	0	0	0	2	0	6	0
X4082	Cnidaria	Cnidaria_X	Hydrozoa	NA	NA	0	0	0	0	0	0	0	0	0	0	0	0	0	0	0	0	0	0	0	0	0	0	0	0	0	0	0	0	0	0	0	0	0	0	0	0	0	0	0	0	0	0	0	0
X413	Cnidaria	Cnidaria_X	Hydrozoa	NA	NA	6	3	7	12	6	13	10	10	2	9	1	0	3	5	4	5	2	0	3	2	24	57	26	5	33	56	49	15	18	20	7	39	2	36	22	9	1	3	6	5	4	12	5	0
X632	Cnidaria	Cnidaria_X	Hydrozoa	NA	NA	0	0	0	0	0	0	0	0	0	1	0	0	0	0	0	0	0	0	0	0	0	0	0	0	0	0	0	0	0	0	0	0	0	0	0	0	0	0	0	0	0	0	0	0
X186	Cnidaria	Cnidaria_X	Hydrozoa	Nanomia	Nanomia_bijuga	0	0	0	0	0	0	1	0	0	0	0	0	1	0	0	1	3	4297	0	0	1	12	1	0	0	0	0	0	19	8	0	0	0	1	1	0	0	0	0	0	2	7	28	1
X1065	Cnidaria	Cnidaria_X	Hydrozoa	Obelia	Obelia_geniculata	0	0	0	0	1	0	2	0	0	0	0	0	0	0	0	0	0	0	1	0	0	0	1	0	0	0	0	3	1	0	0	0	0	8	19	3	0	0	0	6	4	0	6	9
X1526	Cnidaria	Cnidaria_X	Hydrozoa	Obelia	Obelia_geniculata	0	0	0	1	0	1	0	0	0	0	0	0	0	0	0	0	0	0	0	0	0	0	0	0	0	0	0	0	1	1	1	0	0	6	1	0	0	0	0	5	0	2	5	1
X1951	Cnidaria	Cnidaria_X	Hydrozoa	Obelia	Obelia_longissima	0	0	0	0	1	0	0	0	0	0	1	0	0	0	0	0	0	0	0	0	0	1	0	0	0	0	0	0	0	0	0	1	0	0	0	0	0	0	0	2	0	0	0	0
X2340	Cnidaria	Cnidaria_X	Hydrozoa	Obelia	NA	0	0	0	0	0	0	0	0	0	0	0	0	0	0	0	0	0	0	0	0	0	0	0	0	0	0	0	0	0	0	0	0	0	0	0	0	0	0	0	0	0	0	0	0
X4241	Cnidaria	Cnidaria_X	Hydrozoa	Obelia	Obelia_bidentata	0	0	0	0	0	0	0	0	0	0	0	0	0	0	0	0	0	0	0	0	0	0	0	0	0	0	0	0	0	0	0	0	0	0	0	0	0	0	0	0	0	0	0	0
X653	Cnidaria	Cnidaria_X	Hydrozoa	Obelia	Obelia_geniculata	0	0	0	0	0	0	1	1	2	0	1	0	1	2	3	1	1	2	1	0	0	0	0	1	0	0	2	9	7	0	6	0	0	39	7	0	0	1	1	18	4	5	21	30
X3074	Cnidaria	Cnidaria_X	Hydrozoa	Tiaropsis	Tiaropsis_multicirrata	0	0	0	0	0	0	0	0	0	0	0	0	0	0	0	0	0	0	1	0	0	0	0	0	0	0	0	0	0	0	0	0	0	0	0	0	0	0	2	0	0	0	1	0
X4326	Coccidiomorphea	Agamococcidiorida	Margolisiellidae	Margolisiella	Margolisiella_islandica	0	0	0	0	0	0	0	0	0	0	0	0	0	0	0	0	0	0	0	0	0	0	0	0	0	0	0	0	0	0	0	0	0	0	0	0	0	0	0	0	0	0	0	0
X2533	Coccidiomorphea	Eimeriida	NA	NA	NA	3	1	0	2	0	2	0	2	0	0	1	0	0	1	0	0	0	0	0	0	2	1	4	0	0	0	0	0	0	0	0	0	0	0	0	0	0	0	0	0	0	0	0	0
X4331	Coccidiomorphea	Eimeriida	NA	NA	NA	0	0	0	0	0	0	0	0	0	0	0	0	0	0	0	0	0	0	0	0	0	0	0	0	0	0	0	0	0	0	0	0	0	0	0	0	0	0	0	0	0	0	0	0
X554	Coccidiomorphea	NA	NA	NA	NA	3	8	9	8	11	20	9	7	8	28	4	2	3	17	6	25	4	7	10	0	4	4	2	1	1	4	8	15	20	12	6	1	0	5	5	0	1	2	5	0	0	13	1	3
X4131	Coccidiomorphea	Agamococcidiorida	Rhytidocystidae	Rhytidocystis	Rhytidocystis_cyamus	0	0	0	0	0	0	0	0	0	0	0	0	2	0	0	0	0	0	0	0	0	0	0	0	0	0	0	0	0	0	0	0	0	0	0	0	0	0	0	0	0	0	0	0
X4096	Colpodea	Colpodea_X	Colpodida	Colpoda	Colpoda_steinii	0	0	0	0	1	0	0	0	0	0	0	0	0	0	0	0	0	0	0	0	0	0	0	0	0	0	0	0	0	0	2	0	0	0	0	0	0	0	0	0	0	0	0	0
X3517	Colpodellidea	Colpodellida	Colpodellaceae	Colpodella	Colpodella_sp.	0	0	0	0	0	0	0	0	0	0	0	0	0	0	0	0	0	0	0	0	0	0	0	0	0	0	0	0	3	0	0	0	0	6	0	0	0	0	0	0	0	0	0	0
X665	Colpodellidea	Colpodellida	Colpodellaceae	Colpodella	Colpodella_sp.	0	0	0	0	0	0	0	2	0	0	0	0	0	0	0	0	0	0	0	0	0	0	2	0	0	0	0	0	0	0	0	0	0	0	0	1	0	0	0	0	0	0	0	0
X1917	Colpodellidea	Colpodellida	Colpodellaceae	Voromonas	Voromonas_pontica	0	1	0	0	0	0	3	0	0	0	0	0	0	0	0	0	0	0	0	0	0	0	4	2	0	0	0	0	12	0	0	0	0	0	0	0	0	0	1	0	0	37	0	0
X2611	Compsopogonophyceae	Erythropeltidales	Erythropeltidales_X	Erythrotrichia	Erythrotrichia_carnea	0	0	0	0	0	0	0	0	0	0	1	0	0	0	0	0	1	0	0	0	0	4	0	0	0	0	1	0	0	0	0	0	0	0	0	0	0	0	1	0	0	0	0	0
X1206	CONTH_7	CONTH_7_X	CONTH_7_XX	CONTH_7_XXX	CONTH_7_XXX_sp.	0	0	0	3	0	0	0	1	1	37	9	33	33	2	7	2	0	3	2	0	10	3	0	2	0	1	2	0	3	9	0	2	0	3	0	0	0	0	0	0	0	0	0	0
X321	CONTH_7	CONTH_7_X	CONTH_7_XX	CONTH_7_XXX	CONTH_7_XXX_sp.	0	0	0	15	3	0	2	12	18	786	104	300	279	21	47	25	0	11	21	4	63	7	17	0	1	0	1	5	0	0	0	0	0	0	0	0	0	0	0	0	0	0	0	0
X370	CONTH_7	CONTH_7_X	CONTH_7_XX	CONTH_7_XXX	CONTH_7_XXX_sp.	0	2	0	1	0	0	0	0	0	1	1	33	3	4	0	0	0	0	0	0	0	0	1	0	0	0	0	0	0	0	0	0	0	0	0	0	0	0	0	0	0	0	0	0
X3887	CONTH_8	CONTH_8_X	CONTH_8_XX	CONTH_8_XXX	CONTH_8_XXX_sp.	0	0	0	0	0	0	0	0	0	0	0	0	0	0	0	0	0	0	0	0	0	0	0	0	0	0	0	0	0	0	0	0	0	0	0	0	0	0	0	0	0	0	0	0
X1205	CONThreeP	CONThreeP_X	CONThreeP_XX	Askenasia	Askenasia_sp.	0	0	0	0	0	12	0	0	6	8	0	0	0	0	0	6	0	1	0	0	3	5	0	6	1	2	2	14	11	10	0	3	0	10	1	4	2	0	0	1	0	0	0	0
X1473	CONThreeP	CONThreeP_X	CONThreeP_XX	Askenasia	Askenasia_sp.	0	0	0	0	1	0	0	0	0	4	0	0	0	0	0	0	0	0	0	0	0	0	0	0	0	0	0	2	1	0	1	0	0	5	0	0	0	0	0	1	9	1	4	0
X1912	CONThreeP	CONThreeP_X	CONThreeP_XX	Askenasia	Askenasia_sp.	0	0	0	0	2	0	0	0	1	0	0	0	1	0	0	0	0	0	2	0	1	11	1	1	0	1	0	2	1	0	0	0	0	0	0	0	0	0	0	0	0	4	2	1
X2188	CONThreeP	CONThreeP_X	CONThreeP_XX	Askenasia	Askenasia_sp.	0	0	0	0	0	0	0	0	0	0	0	0	0	0	0	0	0	0	0	0	0	4	2	0	0	0	0	1	1	0	0	4	0	0	0	0	0	0	0	0	0	0	0	0
X3132	CONThreeP	CONThreeP_X	CONThreeP_XX	Askenasia	Askenasia_sp.	0	1	2	2	0	0	0	0	0	0	0	0	1	0	0	0	1	0	1	0	0	1	0	0	0	0	0	2	1	0	0	0	0	0	0	0	0	0	0	0	0	0	0	0
X3901	CONThreeP	CONThreeP_X	CONThreeP_XX	Askenasia	Askenasia_sp.	0	0	4	1	0	1	0	0	1	0	0	0	1	0	0	0	0	0	0	0	0	0	0	0	0	0	0	0	0	0	0	0	0	0	0	0	0	0	0	0	0	0	0	0
X658	CONThreeP	CONThreeP_X	CONThreeP_XX	Askenasia	Askenasia_sp.	17	8	38	83	83	35	32	12	16	72	16	4	13	3	3	4	0	1	2	0	0	1	0	0	0	0	0	0	0	0	0	0	0	0	0	0	0	0	0	0	0	0	0	0
X1849	CONThreeP	CONThreeP_X	CONThreeP_XX	CONThreeP_XXX	CONThreeP_XXX_sp.	0	0	3	5	2	2	4	3	1	18	3	1	7	1	0	0	0	0	3	0	1	2	1	1	0	0	0	1	0	0	1	0	0	0	0	1	0	0	0	0	0	0	0	0
X3519	CONThreeP	CONThreeP_X	CONThreeP_XX	CONThreeP_XXX	CONThreeP_XXX_sp.	0	0	0	0	0	0	0	0	0	0	0	0	0	0	0	0	0	0	0	0	0	0	0	0	0	0	5	3	0	2	0	0	0	2	0	0	0	0	0	0	0	0	0	0
X1294	CONThreeP	CONThreeP_X	NA	NA	NA	0	1	2	0	0	0	0	0	0	0	0	0	1	5	0	2	0	2	17	0	8	16	4	2	1	0	0	3	0	1	0	1	0	32	4	0	4	0	0	0	0	0	0	0
X1297	CONThreeP	CONThreeP_X	NA	NA	NA	11	2	18	14	5	8	4	0	2	9	1	1	2	0	0	0	0	0	4	0	1	0	0	0	0	0	1	6	2	1	0	1	0	2	0	0	0	0	0	0	0	0	0	0
X1359	CONThreeP	CONThreeP_X	CONThreeP_XX	NA	NA	0	0	0	0	1	1	4	6	10	46	4	0	20	5	1	2	3	5	0	0	6	1	1	0	2	0	0	2	0	2	1	0	0	1	0	0	0	0	0	0	0	0	0	0
X2290	CONThreeP	CONThreeP_X	CONThreeP_XX	NA	NA	0	0	0	0	1	0	0	0	0	3	0	0	1	1	5	3	1	0	2	0	2	4	1	0	0	0	1	3	0	4	0	0	0	2	0	0	0	0	0	0	1	0	1	0
X2555	CONThreeP	CONThreeP_X	NA	NA	NA	1	1	0	0	0	0	0	0	0	0	0	0	0	0	0	0	0	0	0	0	0	0	0	0	0	0	0	3	2	1	0	0	0	2	5	1	5	0	0	2	0	0	1	0
X3389	CONThreeP	CONThreeP_X	NA	NA	NA	0	0	0	0	0	0	0	0	0	2	0	0	0	0	0	0	0	0	1	0	0	1	0	1	0	0	0	2	0	0	0	0	0	0	0	0	0	0	0	0	0	0	0	0
X915	CONThreeP	CONThreeP_X	CONThreeP_XX	NA	NA	6	5	14	23	13	6	11	5	14	47	12	5	9	6	3	3	1	0	8	0	0	6	1	1	3	1	4	9	8	4	3	4	0	18	1	1	1	1	1	4	0	0	0	1
X966	CONThreeP	CONThreeP_X	NA	NA	NA	0	0	0	0	0	0	0	0	0	0	0	0	0	0	0	0	0	0	1	0	0	1	0	1	5	4	2	5	0	0	0	0	0	0	0	0	2	0	3	10	68	52	1	3
X1119	CONThreeP	CONThreeP_X	Urotrichidae	Urotricha	Urotricha_sp.	0	2	0	0	2	2	0	3	3	19	1	1	4	1	2	0	1	1	0	0	4	3	0	4	2	2	3	3	4	1	4	3	1	9	1	3	1	1	1	9	8	0	0	1
X1420	Craniata	Craniata_X	Teleostei	Auxis	Auxis_rochei	0	1	3	5	6	0	0	0	2	9	3	1	3	3	4	1	0	2	0	0	0	1	1	0	0	0	1	0	0	3	0	2	0	0	0	0	0	0	1	1	1	0	0	0
X769	Craniata	Craniata_X	Teleostei	Auxis	Auxis_rochei	29	7	1	0	5	0	4	0	0	2	3	0	2	0	0	1	0	1	2	0	1	0	0	0	0	0	0	2	15	15	4	0	0	4	0	0	0	1	4	2	0	2	0	0
X957	Craniata	Craniata_X	Teleostei	Auxis	Auxis_rochei	3	1	3	1	1	0	64	3	0	2	0	1	0	1	0	1	1	2	0	0	0	1	0	0	1	0	0	0	1	2	0	0	0	2	0	0	0	0	0	0	0	0	0	64
X2919	Craniata	Craniata_X	Teleostei	Clupea	Clupea_harengus	0	0	0	0	0	0	0	0	0	0	0	0	0	0	0	0	0	0	0	0	0	0	0	0	0	1	0	0	0	0	0	0	0	0	0	0	0	0	0	0	0	0	0	0
X3584	Craniata	Craniata_X	Teleostei	Clupea	Clupea_harengus	0	0	0	0	0	0	0	0	0	0	0	0	0	0	0	0	0	0	0	0	0	0	0	0	0	0	0	0	0	0	0	0	0	0	0	0	0	0	0	0	0	0	0	0
X4318	Craniata	Craniata_X	Craniata_XX	Craniata_XXX	Craniata_XXX_sp.	0	0	0	0	0	0	3	0	0	0	0	0	0	0	0	0	0	0	0	0	0	0	0	0	0	0	0	0	0	0	0	0	0	0	0	0	0	0	0	0	0	0	0	0
X945	Craniata	Craniata_X	Teleostei	Gadus	Gadus_morhua	1	1	0	2	0	1	4	0	5	8	2	1	3	1	0	5	0	0	1	0	0	3	0	2	0	0	0	0	1	2	0	1	0	0	0	0	0	1	0	0	0	0	0	0
X3928	Craniata	Craniata_X	Mammalia	Homo	Homo_sapiens	0	0	0	0	0	0	0	0	0	0	0	0	0	0	0	0	1	0	0	0	0	0	0	0	0	0	0	0	0	0	0	0	0	0	0	0	0	0	0	0	0	0	0	0
X1520	Craniata	Craniata_X	Teleostei	Hypseleotris	Hypseleotris_sp.	6	2	4	4	9	24	4	3	1	0	0	0	1	3	0	1	1	10	0	0	1	2	2	0	0	0	0	4	0	1	0	0	0	0	1	0	0	0	0	0	0	0	1	0
X1990	Craniata	Craniata_X	Teleostei	Kareius	Kareius_bicoloratus	0	0	0	0	0	0	0	1	1	0	0	0	0	0	0	0	0	0	0	0	0	0	0	0	0	0	0	0	0	0	0	0	0	0	0	0	0	0	0	0	0	0	0	0
X219	Craniata	Craniata_X	Teleostei	Kareius	Kareius_bicoloratus	12	4	1	0	0	0	2	40	1	0	6	0	3	242	4	4	1	34	6	1	12	19	4	5	45	1	0	2	10	15	11	49	0	0	0	0	0	0	1	0	10	0	0	0
X1026	Craniata	Craniata_X	NA	NA	NA	28	3	0	0	1	1	2	1	2	0	2	0	0	0	0	0	0	0	0	0	2	0	4	2	0	4	0	1	0	0	3	3	0	1	1	2	0	0	0	0	0	9	0	0
X2011	Craniata	Craniata_X	Teleostei	NA	NA	0	0	0	0	0	0	0	0	0	0	0	0	0	0	0	0	0	0	0	0	0	0	0	0	0	0	0	0	0	0	0	0	0	0	0	0	0	0	0	0	0	0	0	0
X3162	Craniata	Craniata_X	Teleostei	NA	NA	0	0	0	0	0	0	0	0	0	0	0	0	0	0	0	0	0	0	0	0	0	0	0	0	0	0	0	0	0	0	0	0	0	0	0	0	0	0	0	0	0	0	0	0
X3237	Craniata	Craniata_X	Teleostei	NA	NA	0	0	0	0	0	0	0	0	0	0	0	0	0	0	0	0	0	0	0	0	0	0	0	0	0	0	0	0	0	0	0	0	0	0	0	0	0	0	0	0	0	0	0	0
X4080	Craniata	Craniata_X	Teleostei	NA	NA	0	0	0	0	0	0	0	0	0	0	0	0	0	0	0	0	0	0	0	0	0	0	0	0	0	0	0	0	0	0	0	0	0	0	0	0	0	0	0	0	0	0	0	0
X262	Craniata	Craniata_X	Teleostei	Nematalosa	Nematalosa_erebi	7	0	375	22	18	2	7	2	3	262	6	0	0	6	3	5	0	3	2	0	11	1	3	0	0	136	5	1	2	0	1	30	2	3	0	0	0	0	1	253	0	2	0	0
X1657	Craniata	Craniata_X	Teleostei	Perca	Perca_fluviatilis	0	1	3	5	4	0	11	1	2	6	2	0	0	1	0	2	0	0	1	0	0	0	0	0	0	0	0	0	0	1	0	0	0	0	0	0	0	0	0	0	0	0	0	0
X2365	Cryptomycota	Cryptomycotina	Cryptomycotina_X	Cryptomycotina_XX	Cryptomycotina_XX_sp.	1	0	0	0	1	0	0	0	1	1	1	0	0	5	2	0	0	0	0	0	0	0	0	0	0	0	0	0	0	0	1	0	0	0	0	0	0	0	0	0	0	0	0	0
X3051	Cryptomycota	Cryptomycotina	Cryptomycotina_X	Cryptomycotina_XX	Cryptomycotina_XX_sp.	0	0	0	0	0	0	0	1	0	0	0	0	0	2	0	0	0	0	0	0	1	0	1	0	1	0	1	3	2	0	0	1	0	0	1	0	0	0	0	0	0	0	1	0
X3922	Cryptomycota	Cryptomycotina	Cryptomycotina_X	Cryptomycotina_XX	Cryptomycotina_XX_sp.	0	0	0	0	0	0	1	0	0	0	0	0	0	0	0	0	0	0	0	0	0	0	0	0	0	0	0	0	0	0	0	0	0	1	0	0	0	0	0	0	0	0	0	0
X3971	Cryptomycota	Cryptomycotina	Cryptomycotina_X	Cryptomycotina_XX	Cryptomycotina_XX_sp.	0	0	0	0	0	0	0	0	0	4	0	0	0	0	0	0	0	0	0	0	1	0	0	0	0	0	0	0	0	1	0	0	0	0	1	0	0	0	0	0	0	0	0	0
X137	Cryptophycea	Cryptomonadales	Cryptomonadales_X	Geminigera	Geminigera_cryophila	44	31	48	42	40	53	32	19	22	90	25	16	55	47	37	133	34	55	40	5	10	59	24	30	28	43	13	47	21	27	24	70	2	89	32	8	40	32	57	97	23	186	124	52
X1713	Cryptophyceae	Cryptomonadales	Hemiselmidaceae	Chroomonas	Chroomonas_sp.	0	2	1	1	3	3	0	1	1	3	0	2	2	5	2	3	3	2	0	0	1	0	1	0	1	1	1	5	3	1	2	1	0	3	3	0	0	0	1	2	0	0	2	0
X238	Cryptophyceae	Cryptomonadales	Cryptomonadales_X	Falcomonas	Falcomonas_daucoides	40	41	58	48	58	38	19	15	9	30	7	5	8	28	5	2	0	1	63	1	6	27	14	10	21	17	10	120	42	148	76	460	2	485	141	79	413	72	83	35	0	13	22	9
X183	Cryptophyceae	Cryptomonadales	Cryptomonadales_X	Geminigera	Geminigera_cryophila	22	15	29	40	38	43	60	36	27	193	55	27	54	90	77	165	41	55	70	7	25	95	12	18	33	26	11	43	17	42	53	102	0	113	45	26	40	11	37	23	3	35	19	3
X3735	Cryptophyceae	Cryptomonadales	Cryptomonadales_X	Geminigera	Geminigera_cryophila	0	0	0	0	0	0	0	2	0	0	0	0	0	0	0	0	0	0	0	0	0	0	0	0	0	0	0	0	0	0	0	0	0	0	0	0	0	0	1	0	0	0	0	0
X2420	Cryptophyceae	Goniomonadales	Goniomonadales_X	Goniomonadales_XX	Goniomonadales_XX_sp.	5	3	5	3	0	2	1	0	1	0	1	0	2	0	0	0	0	0	0	0	0	1	0	0	1	0	0	0	2	0	0	0	0	0	0	0	0	0	0	0	0	0	0	0
X3284	Cryptophyceae	Goniomonadales	Goniomonadales_X	Goniomonas	NA	0	0	0	3	0	0	0	1	0	0	0	1	0	0	0	0	0	0	0	0	0	0	1	0	0	0	0	0	0	0	1	0	0	0	0	0	0	0	0	0	0	0	0	0
X2696	Cryptophyceae	Cryptomonadales	Hemiselmidaceae	Hemiselmis	Hemiselmis_sp.	1	0	0	0	3	1	2	3	2	0	1	0	0	0	3	0	0	1	0	0	0	1	0	0	1	2	0	0	1	2	0	0	0	2	0	0	0	0	0	0	0	0	0	1
X410	Cryptophyceae	Cryptomonadales	Hemiselmidaceae	Hemiselmis	Hemiselmis_cryptochromatica	17	9	9	13	6	15	8	6	5	10	4	0	3	4	6	2	0	1	19	1	4	8	2	6	4	7	3	39	20	30	45	146	1	277	89	29	105	31	63	21	2	18	49	11
X742	Cryptophyceae	Cryptomonadales	Hemiselmidaceae	Hemiselmis	Hemiselmis_sp.	4	1	4	4	2	5	0	2	3	1	2	0	0	4	2	0	0	0	2	1	0	1	2	4	0	1	1	6	7	9	11	73	0	78	21	10	38	9	20	7	0	2	7	3
X2373	Cryptophyceae	Cryptomonadales	Cryptomonadales_X	NA	NA	0	0	0	1	0	1	0	1	0	0	0	0	0	0	1	0	0	1	1	0	0	0	0	0	0	2	0	0	0	0	0	0	0	0	1	0	0	0	0	0	0	0	1	0
X2400	Cryptophyceae	Cryptomonadales	Cryptomonadales_X	NA	NA	0	0	0	0	0	2	0	0	0	1	0	0	0	0	0	0	0	0	0	0	0	0	0	0	0	0	0	0	0	0	0	0	1	0	0	0	0	0	0	0	0	0	0	0
X3396	Cryptophyceae	Cryptomonadales	Cryptomonadales_X	NA	NA	0	0	0	0	0	0	1	0	0	0	1	0	0	0	0	0	0	0	0	0	0	0	0	0	0	0	0	0	0	0	0	0	0	0	1	0	0	0	0	0	0	0	0	0
X3433	Cryptophyceae	Cryptomonadales	Cryptomonadales_X	NA	NA	0	0	0	0	0	0	0	0	0	0	0	0	0	0	0	1	1	1	0	0	0	0	0	0	0	0	0	0	0	0	0	0	0	0	0	0	0	0	0	0	0	0	1	0
X3646	Cryptophyceae	Cryptomonadales	NA	NA	NA	2	0	1	1	0	0	0	0	0	2	0	0	1	0	0	0	0	3	0	0	0	0	0	0	0	0	0	0	0	0	0	0	0	0	0	0	0	0	0	0	0	0	0	0
X80	Cryptophyceae	Cryptomonadales	Cryptomonadales_X	NA	NA	185	214	227	338	231	243	177	150	119	454	102	89	129	140	176	242	65	105	76	13	37	142	22	57	64	58	45	141	69	99	50	152	1	234	92	73	134	100	156	243	91	255	239	105
X898	Cryptophyceae	Cryptomonadales	Cryptomonadales_X	NA	NA	0	1	1	5	4	0	2	1	1	4	2	1	4	4	6	7	4	3	1	0	0	4	1	2	0	0	1	2	0	0	2	2	0	3	1	7	2	2	1	2	1	12	2	1
X3913	Cryptophyceae	Goniomonadales	Goniomonadales_X	NA	NA	0	0	0	1	0	1	2	0	0	2	0	0	0	0	0	0	0	0	1	0	0	0	0	0	0	0	2	0	0	1	0	0	0	0	0	0	0	0	0	0	0	0	0	0
X1298	Cryptophyceae	NA	NA	NA	NA	5	7	12	11	7	2	4	2	3	13	1	0	2	2	9	1	0	0	3	0	0	0	2	1	1	2	1	4	0	1	0	2	0	12	2	0	0	0	0	0	0	0	0	0
X184	Cryptophyceae	NA	NA	NA	NA	119	97	137	162	127	118	75	58	66	253	64	40	91	94	92	84	12	21	86	6	23	88	21	50	44	53	71	146	76	132	80	218	1	336	150	76	68	53	46	36	6	45	40	17
X2347	Cryptophyceae	Cryptomonadales	Cryptomonadales_X	Plagioselmis	Plagioselmis_nannoplanctica	0	0	1	0	0	1	1	2	0	0	0	0	0	0	0	0	0	0	0	0	0	1	0	0	0	1	0	0	0	0	0	0	0	0	1	0	0	0	3	0	0	2	0	0
X164	Cryptophyceae	Pyrenomonadales	Pyrenomonadaceae	Rhodomonas	Rhodomonas_sp.	1	1	1	1	0	0	1	0	0	0	0	1	0	0	1	0	0	0	1	0	1	1	0	1	1	2	1	23	7	8	29	205	1	358	130	72	221	105	208	705	387	246	246	106
X2962	Cryptophyceae	Pyrenomonadales	Pyrenomonadaceae	Rhodomonas	Rhodomonas_sp.	0	0	0	0	0	0	0	0	0	0	0	0	0	0	0	0	0	0	0	0	0	0	0	0	0	0	0	0	0	0	0	0	0	1	1	0	1	0	1	1	0	2	0	0
X642	Cryptophyceae	Pyrenomonadales	Pyrenomonadaceae	Rhodomonas	NA	9	18	25	30	24	22	16	10	24	39	15	1	8	10	12	9	5	13	20	3	2	15	6	4	14	7	14	19	10	8	3	25	0	19	9	5	2	1	1	0	0	1	4	0
X652	Cryptophyceae	Pyrenomonadales	Pyrenomonadaceae	Rhodomonas	Rhodomonas_salina	2	8	11	8	16	6	4	6	1	10	6	2	1	10	2	5	0	0	11	0	0	3	4	4	2	4	2	16	5	10	12	54	0	113	45	21	24	10	7	7	3	8	10	3
X15	Cryptophyceae	Cryptomonadales	Cryptomonadales_X	Teleaulax	Teleaulax_amphioxeia	403	381	518	704	786	775	588	586	509	2192	724	1875	1196	1288	1527	3753	1186	1636	746	93	601	1352	344	546	864	454	287	441	349	314	234	1096	2	728	271	259	597	198	564	572	200	614	671	241
X3978	Cryptophyceae	Cryptomonadales	Cryptomonadales_X	Teleaulax	Teleaulax_amphioxeia	0	0	2	0	0	0	0	0	0	0	0	0	1	0	0	0	0	0	0	0	0	0	0	0	0	0	0	0	0	0	0	0	0	0	0	0	0	0	0	0	0	0	0	0
X44	Cryptophyceae	Cryptomonadales	Cryptomonadales_X	Teleaulax	Teleaulax_acuta	88	108	136	198	183	221	159	177	173	595	197	111	255	389	442	1082	328	355	171	41	124	349	108	133	139	118	63	73	57	67	113	337	3	522	187	143	400	194	561	282	141	895	696	259
X623	Cryptophyceae	Cryptomonadales	Cryptomonadales_X	Teleaulax	Teleaulax_amphioxeia	0	0	5	3	8	3	3	2	2	1	2	5	7	5	5	17	4	3	1	0	2	5	1	0	0	1	0	1	1	0	1	3	0	1	2	0	0	0	1	0	1	4	2	2
X734	Ctenophora	Ctenophora_X	Ctenophora_XX	Beroe	Beroe_cucumis	0	0	0	0	0	0	0	0	0	0	0	0	0	0	0	0	0	0	0	0	0	0	0	0	0	0	0	0	0	0	0	0	0	0	0	0	0	0	0	0	0	0	0	0
X902	Ctenophora	Ctenophora_X	Ctenophora_XX	Beroe	Beroe_cucumis	0	1	0	2	0	0	0	0	1	0	0	0	1	0	0	0	0	0	0	0	0	0	0	0	0	0	0	0	0	0	4	1	0	0	1	0	0	0	2	147	0	16	3	1
X3417	Ctenophora	Ctenophora_X	Ctenophora_XX	Mertensia	Mertensia_ovum	0	0	0	0	0	0	0	0	0	0	0	0	0	0	0	0	0	0	0	0	0	0	0	0	0	0	0	0	0	0	0	0	0	0	0	0	0	0	0	0	0	0	0	0
X3077	Ctenophora	Ctenophora_X	Ctenophora_XX	NA	NA	0	0	0	0	0	0	0	0	0	0	0	0	0	0	0	0	0	0	0	0	0	0	0	0	1	0	0	0	0	0	0	0	0	0	0	0	0	0	0	0	0	0	0	0
X67	Ctenophora	Ctenophora_X	Ctenophora_XX	NA	NA	2	1	0	11	4	13	5	34	95	94	27	5553	144	16	6	55	27	238	51	3	20	71	70	23	6515	279	32	148	253	311	190	470	7	425	90	72	18	588	216	1512	529	1638	874	32
X69	Ctenophora	Ctenophora_X	Ctenophora_XX	NA	NA	1	1	2	1	0	0	3	5	0	0	1	0	0	0	0	0	0	0	1	0	0	1	0	0	0	0	0	1	0	0	0	0	0	2	2	0	8	4	5	110	48	34	202	14
X1695	Cyclotrichium_like_organism	Cyclotrichium_like_organism_X	Cyclotrichium_like_organism_XX	Cyclotrichium	Cyclotrichium_sp.	0	0	0	0	0	0	0	1	0	3	1	5	4	1	1	0	0	2	0	0	0	0	1	0	0	0	0	0	0	0	0	0	0	0	0	0	0	0	0	0	0	0	0	0
X1995	Cyclotrichium_like_organism	Cyclotrichium_like_organism_X	Cyclotrichium_like_organism_XX	Cyclotrichium	Cyclotrichium_sp.	0	0	0	1	0	0	0	1	0	2	0	0	1	0	0	0	0	0	0	0	0	0	1	0	0	0	0	0	0	0	1	0	0	1	0	0	0	0	0	0	0	0	0	0
X3337	Cyclotrichium_like_organism	Cyclotrichium_like_organism_X	Cyclotrichium_like_organism_XX	Cyclotrichium	Cyclotrichium_sp.	0	0	0	0	0	0	0	0	0	0	0	0	0	0	0	0	0	0	0	0	0	0	0	0	0	0	0	0	0	0	0	0	0	0	0	0	0	0	0	0	0	0	0	0
X463	Cyclotrichium_like_organism	Cyclotrichium_like_organism_X	Cyclotrichium_like_organism_XX	Cyclotrichium	Cyclotrichium_cyclokaryon	0	0	0	0	0	0	0	0	1	0	2	234	78	61	24	0	0	2	0	0	0	4	1	29	10	40	9	53	116	219	19	82	0	94	9	3	25	1	9	0	0	0	0	0
X817	Dictyochophyceae	Dictyochophyceae_X	Pedinellales	Apedinella	Apedinella_radians	0	0	0	0	0	0	0	0	0	0	0	0	0	0	1	2	0	0	0	0	0	0	0	1	0	0	0	0	0	0	0	0	0	0	0	0	0	0	0	0	0	0	0	0
X274	Dictyochophyceae	Dictyochophyceae_X	Dictyochales	Dictyocha	Dictyocha_speculum	5	3	6	17	15	4	1	4	2	15	2	1	1	0	0	1	0	3	0	0	2	4	0	0	3	0	1	7	0	4	0	2	0	0	0	0	2	3	2	10	8	17	4	6
X3537	Dictyochophyceae	Dictyochophyceae_X	Dictyochales	Dictyocha	Dictyocha_speculum	0	0	0	0	0	0	0	0	0	0	0	0	0	0	0	0	0	0	0	0	0	0	0	0	0	0	0	0	0	0	0	0	0	0	0	0	0	0	0	0	0	0	0	0
X236	Dictyochophyceae	Dictyochophyceae_X	Florenciellales	Florenciella	Florenciella_sp.	28	18	29	36	24	17	19	9	6	21	4	4	9	16	8	22	8	31	25	1	15	32	9	20	20	12	23	21	14	36	25	33	1	18	14	7	21	21	38	22	11	24	15	7
X2740	Dictyochophyceae	Dictyochophyceae_X	Pedinellales	Helicopedinella	Helicopedinella_sp.	0	0	0	0	0	1	0	0	0	0	0	0	0	0	0	0	0	0	0	0	0	0	0	0	0	0	0	0	0	0	0	0	0	0	0	0	0	0	0	0	0	0	0	0
X2106	Dictyochophyceae	Dictyochophyceae_X	Florenciellales	NA	NA	0	0	0	0	1	0	0	0	0	0	0	0	0	0	0	0	0	0	0	0	0	0	0	0	0	0	0	0	0	0	0	0	0	0	0	0	0	0	0	0	0	0	0	0
X378	Dictyochophyceae	Dictyochophyceae_X	Pedinellales	NA	NA	0	3	0	1	0	1	0	0	0	0	0	0	0	0	0	0	0	0	0	0	0	0	0	0	0	1	1	10	3	8	9	45	0	71	25	13	22	4	14	2	0	2	4	3
X889	Dictyochophyceae	Dictyochophyceae_X	Florenciellales	NA	NA	0	0	0	0	0	0	0	0	0	0	0	0	0	0	0	0	0	0	0	0	0	0	0	0	0	0	0	0	0	0	0	0	0	0	0	0	0	0	0	0	0	0	0	0
X263	Dictyochophyceae	Dictyochophyceae_X	Pedinellales	Pedinellales_X	Pedinellales_X_sp.	8	2	3	1	0	6	3	0	2	2	0	0	0	0	0	0	0	0	0	0	0	2	0	1	5	0	0	2	2	2	8	14	0	17	9	9	56	38	101	53	17	17	13	5
X3319	Dictyochophyceae	Dictyochophyceae_X	Pedinellales	Pedinellales_X	Pedinellales_X_sp.	0	0	0	0	0	0	0	0	1	0	0	0	0	0	0	0	0	0	0	0	0	0	0	0	0	0	0	0	0	0	0	0	0	0	0	0	0	0	0	0	0	0	0	0
X3635	Dictyochophyceae	Dictyochophyceae_X	Pedinellales	Pedinellales_X	Pedinellales_X_sp.	0	0	0	0	0	0	0	0	0	0	0	0	0	0	0	0	0	0	0	0	0	0	0	0	0	0	0	0	0	0	0	0	0	0	0	0	0	0	0	0	0	0	0	0
X404	Dictyochophyceae	Dictyochophyceae_X	Pedinellales	Pedinellales_X	Pedinellales_X_sp.	62	39	56	63	36	17	20	13	1	24	1	0	3	3	3	2	1	1	8	0	8	11	1	9	5	5	5	56	16	60	35	90	2	141	57	36	30	5	11	7	0	6	4	1
X515	Dictyochophyceae	Dictyochophyceae_X	Pedinellales	Pedinellales_X	Pedinellales_X_sp.	25	12	44	31	13	15	8	6	4	5	0	1	2	7	1	2	0	3	8	2	2	6	2	2	7	9	2	36	17	39	21	41	4	83	36	21	9	4	5	11	0	4	1	1
X627	Dictyochophyceae	Dictyochophyceae_X	Pedinellales	Pedinellales_X	Pedinellales_X_sp.	0	0	0	0	0	0	0	0	0	0	0	0	0	0	0	0	0	0	0	0	0	0	0	0	0	0	0	0	0	0	3	16	0	43	38	19	42	2	8	1	0	0	0	0
X819	Dictyochophyceae	Dictyochophyceae_X	Pedinellales	Pedinellales_X	Pedinellales_X_sp.	0	0	0	0	0	0	0	0	0	0	0	0	0	0	0	0	0	0	0	0	0	0	0	0	0	0	1	0	0	0	0	0	0	0	0	0	0	0	0	0	0	2	0	0
X865	Dictyochophyceae	Dictyochophyceae_X	Pedinellales	Pedinellales_X	Pedinellales_X_sp.	20	16	0	0	0	4	36	0	0	0	0	0	0	1	0	0	0	0	0	0	0	0	2	0	0	0	0	0	0	0	0	0	0	0	0	0	0	0	0	0	0	0	0	0
X461	Dictyochophyceae	Dictyochophyceae_X	Florenciellales	Pseudochatonella	Pseudochatonella_sp.	0	0	0	0	0	0	0	0	0	0	0	0	0	0	0	0	0	0	0	0	0	2	0	0	1	0	0	0	0	0	0	0	0	0	0	0	0	0	0	1	0	0	0	0
X1202	Dictyochophyceae	Dictyochophyceae_X	Florenciellales	Pseudochattonella	Pseudochattonella_farcimen	0	0	0	0	0	0	0	0	0	0	0	0	0	0	0	0	0	0	0	0	0	0	0	0	0	0	0	0	0	0	0	0	0	0	0	0	0	0	0	0	0	0	0	0
X1463	Dictyochophyceae	Dictyochophyceae_X	Florenciellales	Pseudochattonella	Pseudochattonella_verruculosa	0	0	0	0	2	0	0	0	0	0	0	0	0	0	0	0	0	0	0	0	0	0	0	0	0	0	0	0	0	0	0	0	0	0	0	0	0	0	0	0	0	0	0	0
X1652	Dictyochophyceae	Dictyochophyceae_X	Florenciellales	Pseudochattonella	NA	0	0	0	0	0	0	0	1	0	0	0	0	0	0	0	0	0	0	0	0	0	0	0	0	0	0	0	0	0	0	0	0	0	0	0	0	0	0	0	0	0	0	0	0
X166	Dictyochophyceae	Dictyochophyceae_X	Florenciellales	Pseudochattonella	Pseudochattonella_verruculosa	0	0	1	2	4	0	0	1	1	7	1	0	0	1	3	8	4	5	4	0	1	6	3	1	2	2	0	5	1	7	8	15	0	1	1	0	5	2	3	5	12	21	3	7
X1743	Dictyochophyceae	Dictyochophyceae_X	Florenciellales	Pseudochattonella	Pseudochattonella_verruculosa	0	0	0	0	0	0	0	0	0	0	0	0	0	0	0	0	0	0	0	1	0	0	0	0	0	0	0	0	1	0	0	0	0	0	0	0	0	0	0	0	0	0	0	0
X224	Dictyochophyceae	Dictyochophyceae_X	Florenciellales	Pseudochattonella	Pseudochattonella_farcimen	0	0	3	0	1	0	1	0	0	4	1	0	2	1	0	4	1	1	0	0	0	2	1	0	5	0	1	5	0	2	3	5	0	4	0	0	4	2	4	1	6	8	4	7
X2594	Dictyochophyceae	Dictyochophyceae_X	Florenciellales	Pseudochattonella	Pseudochattonella_verruculosa	0	0	0	0	0	0	0	0	0	0	0	0	0	0	0	0	0	0	0	0	0	0	0	0	0	0	0	0	0	0	1	0	0	0	0	0	0	0	0	0	0	0	0	0
X2758	Dictyochophyceae	Dictyochophyceae_X	Florenciellales	Pseudochattonella	Pseudochattonella_farcimen	0	0	0	0	0	0	0	0	0	0	0	0	0	0	0	0	0	0	0	0	0	0	0	0	0	0	0	0	0	0	0	0	0	0	0	0	0	0	0	0	0	0	0	0
X3354	Dictyochophyceae	Dictyochophyceae_X	Florenciellales	Pseudochattonella	NA	0	0	0	0	0	0	0	0	0	0	0	0	0	0	0	0	0	0	0	0	0	0	0	0	0	0	0	0	0	0	0	0	0	0	0	0	1	0	0	0	0	0	0	1
X573	Dictyochophyceae	Dictyochophyceae_X	Florenciellales	Pseudochattonella	Pseudochattonella_verruculosa	0	0	0	0	1	0	0	0	0	0	0	1	0	0	1	0	2	1	4	0	0	2	0	0	0	0	1	0	0	1	0	0	0	0	0	1	0	0	0	1	0	3	0	0
X64	Dictyochophyceae	Dictyochophyceae_X	Florenciellales	Pseudochattonella	NA	1	1	1	2	3	0	2	7	0	12	0	4	1	6	9	9	13	17	2	3	5	9	1	9	10	0	3	5	5	7	3	3	0	0	1	2	5	3	9	12	1	6	13	2
X1685	Dictyochophyceae	Dictyochophyceae_X	Pedinellales	Pseudopedinella	Pseudopedinella_elastica	0	0	0	0	0	0	0	1	0	0	0	0	0	0	0	0	0	0	0	0	0	0	0	0	0	0	0	0	0	0	0	0	0	0	0	0	1	2	2	2	2	0	0	1
X2527	Dictyochophyceae	Dictyochophyceae_X	Pedinellales	Pseudopedinella	Pseudopedinella_elastica	0	0	0	0	0	0	0	0	0	0	0	0	0	0	0	0	0	0	0	0	0	0	0	0	0	0	0	0	0	0	0	0	0	0	0	0	0	0	0	0	0	5	0	0
X2617	Dictyochophyceae	Dictyochophyceae_X	Pedinellales	Pseudopedinella	Pseudopedinella_elastica	0	0	0	0	0	0	0	0	0	0	0	0	0	0	0	0	1	0	0	0	0	0	0	0	0	0	0	0	0	0	0	0	0	0	0	0	0	0	0	0	0	0	0	0
X3003	Dictyochophyceae	Dictyochophyceae_X	Pedinellales	Pseudopedinella	Pseudopedinella_elastica	0	0	0	0	0	0	0	0	0	0	0	0	0	0	0	0	0	0	0	0	0	0	0	0	0	0	0	0	0	0	0	0	0	0	0	0	0	0	0	0	2	0	0	1
X3418	Dictyochophyceae	Dictyochophyceae_X	Pedinellales	Pseudopedinella	Pseudopedinella_elastica	0	0	0	0	0	0	0	0	0	0	0	0	0	0	0	0	0	0	0	0	0	0	0	0	0	0	0	0	0	0	0	0	0	0	0	0	0	0	0	0	0	0	0	0
X3440	Dictyochophyceae	Dictyochophyceae_X	Pedinellales	Pseudopedinella	Pseudopedinella_elastica	0	0	0	0	0	1	0	0	0	0	0	0	0	0	0	0	0	0	0	0	0	0	0	0	0	0	0	0	0	0	1	0	0	0	0	0	0	0	0	0	0	1	0	0
X4388	Dictyochophyceae	Dictyochophyceae_X	Pedinellales	Pseudopedinella	Pseudopedinella_elastica	0	0	0	0	0	0	0	0	0	0	0	0	0	0	0	0	0	0	0	0	0	0	0	0	0	0	0	0	0	0	0	0	0	0	0	0	0	0	0	0	0	0	0	0
X4443	Dictyochophyceae	Dictyochophyceae_X	Pedinellales	Pseudopedinella	Pseudopedinella_elastica	0	0	0	0	0	0	0	0	0	0	0	0	0	0	0	0	0	0	0	0	0	0	0	0	0	0	0	0	0	0	0	0	0	0	0	0	0	0	0	0	0	0	0	0
X4445	Dictyochophyceae	Dictyochophyceae_X	Pedinellales	Pseudopedinella	Pseudopedinella_elastica	0	0	0	0	0	0	0	0	0	0	0	0	0	0	0	0	0	0	0	0	0	0	0	0	0	0	0	0	0	0	0	0	0	0	0	0	0	0	0	0	0	0	0	0
X4455	Dictyochophyceae	Dictyochophyceae_X	Pedinellales	Pseudopedinella	Pseudopedinella_elastica	0	0	0	0	0	0	0	0	0	0	0	0	0	0	0	0	0	0	0	0	0	0	0	0	0	0	0	0	0	0	0	0	0	0	0	0	0	0	0	0	0	0	0	0
X4461	Dictyochophyceae	Dictyochophyceae_X	Pedinellales	Pseudopedinella	Pseudopedinella_elastica	0	0	0	0	0	0	0	0	0	0	0	0	0	0	0	0	0	0	0	0	0	0	0	0	0	0	0	0	0	0	0	0	0	0	0	0	0	0	0	0	0	0	0	0
X4463	Dictyochophyceae	Dictyochophyceae_X	Pedinellales	Pseudopedinella	Pseudopedinella_elastica	0	0	0	0	0	0	0	0	0	0	0	0	0	0	0	0	0	0	0	0	0	0	0	0	0	0	0	0	0	0	0	0	0	0	0	0	0	0	0	0	0	0	0	0
X71	Dictyochophyceae	Dictyochophyceae_X	Pedinellales	Pseudopedinella	Pseudopedinella_elastica	0	1	1	5	2	2	1	0	1	0	1	0	1	0	2	8	0	1	4	0	0	4	2	6	8	5	8	41	15	24	26	87	1	55	19	10	128	118	302	363	351	371	371	144
X1655	Dictyochophyceae	Dictyochophyceae_X	Pedinellales	Pteridomonas	Pteridomonas_danica	3	1	0	0	0	0	3	1	0	0	0	0	0	5	0	3	1	0	0	0	0	1	1	0	0	1	5	14	0	1	0	0	0	1	1	0	0	0	3	1	0	0	3	0
X2194	Dictyochophyceae	Dictyochophyceae_X	Pedinellales	Pteridomonas	Pteridomonas_danica	0	0	0	0	0	0	0	0	0	0	0	0	0	3	0	0	0	0	0	0	0	0	0	0	0	0	1	2	0	0	0	0	0	0	0	0	0	0	0	0	2	0	0	0
X2426	Dictyochophyceae	Dictyochophyceae_X	Pedinellales	Pteridomonas	Pteridomonas_danica	1	1	0	0	0	0	0	0	0	0	0	0	0	0	0	0	0	0	0	0	0	0	0	0	0	0	0	0	0	0	0	0	0	0	0	1	1	0	0	1	0	0	0	0
X1460	Dinophyceae	Gonyaulacales	Goniodomataceae	Alexandrium	Alexandrium_tamutum	0	0	0	0	0	0	0	0	0	0	0	0	0	0	0	0	0	0	0	0	0	0	0	0	0	0	0	0	0	1	0	0	0	0	0	0	0	0	0	0	0	0	0	0
X606	Dinophyceae	Gonyaulacales	Goniodomataceae	Alexandrium	Alexandrium_ostenfeldii	0	0	0	0	0	0	0	0	0	3	0	1	0	0	0	0	0	0	0	0	0	0	0	0	0	9	0	0	0	0	0	0	2	0	0	0	0	0	0	0	0	0	0	0
X703	Dinophyceae	Gonyaulacales	Goniodomataceae	Alexandrium	Alexandrium_hiranoi	0	0	2	0	0	0	0	0	0	0	0	0	0	0	0	0	0	0	0	0	0	0	0	0	0	0	0	0	0	0	0	0	0	0	0	0	0	0	0	0	0	0	0	0
X197	Dinophyceae	Dinophysiales	Amphisoleniaceae	Amphisoleniaceae_X	Amphisoleniaceae_X_sp.	0	0	0	0	0	0	0	0	0	0	0	0	0	0	0	0	0	0	0	0	1	0	0	0	0	0	5	21	21	18	0	0	1	8	0	16	3	28	41	230	241	490	99	159
X2411	Dinophyceae	Dinophysiales	Amphisoleniaceae	Amphisoleniaceae_X	Amphisoleniaceae_X_sp.	0	0	0	0	0	0	0	0	0	0	0	0	0	0	0	0	0	0	0	0	0	0	0	0	0	0	0	0	0	0	0	0	0	0	0	0	0	0	0	0	0	0	0	0
X2963	Dinophyceae	Gonyaulacales	Gonyaulacaceae	Amylax	Amylax_buxus	0	0	0	0	0	0	0	0	0	0	0	0	0	0	0	0	0	0	0	0	0	0	0	0	0	0	0	0	0	0	0	0	0	0	0	0	0	0	0	0	0	0	0	0
X120	Dinophyceae	Gymnodiniales	Gymnodiniaceae	Ankistrodinium	Ankistrodinium_semilunatum	28	32	110	115	138	70	67	63	48	99	63	46	109	74	114	139	62	122	54	1	21	89	31	81	51	69	102	184	143	140	61	289	2	464	178	162	326	253	301	911	102	424	132	135
X1779	Dinophyceae	Peridiniales	Amphidiniopsidaceae	Archaeperidinium	Archaeperidinium_minutum	0	0	0	0	0	0	0	0	0	0	0	0	0	0	1	0	0	0	0	0	0	0	0	0	0	0	1	0	0	0	0	0	0	0	0	0	0	0	0	0	1	0	0	0
X116	Dinophyceae	Suessiales	Suessiaceae	Biecheleria	Biecheleria_sp.	0	0	12	73	2	9	7	16	6	6	6	0	13	2	11	12	22	14	7	6	8	12	24	0	4	30	4	2	21	35	2	19	0	5	8	0	2	4	27	182	77	143	78	53
X1325	Dinophyceae	Suessiales	Suessiaceae	Biecheleria	NA	0	0	0	1	0	0	0	0	1	0	0	0	0	0	0	1	1	0	0	0	0	0	0	0	0	0	0	0	0	0	0	0	0	0	0	0	0	0	0	0	0	0	0	0
X256	Dinophyceae	Suessiales	Suessiaceae	Biecheleria	Biecheleria_sp.	1	6	3	14	2	15	11	5	4	24	3	2	4	4	6	17	14	10	10	2	2	13	0	6	4	10	5	6	15	11	7	4	1	8	9	2	0	3	16	33	9	33	26	9
X2121	Dinophyceae	Suessiales	Borghiellaceae	Borghiella	Borghiella_tenuissima	0	0	0	0	0	0	0	0	0	0	0	0	0	0	0	0	0	0	0	0	0	0	0	0	0	0	0	0	0	0	0	0	0	0	0	0	0	0	0	1	1	0	0	0
X718	Dinophyceae	Gymnodiniales	Chytriodiniaceae	Chytriodinium	Chytriodinium_roseum	0	0	1	0	1	0	0	0	1	2	1	0	0	0	0	2	3	1	0	0	0	0	0	0	1	0	0	1	1	0	1	1	0	3	0	0	0	1	1	2	2	0	0	0
X9	Dinophyceae	Gymnodiniales	Chytriodiniaceae	Chytriodinium	Chytriodinium_roseum	738	655	994	2062	2090	1712	2445	2248	1773	5335	1864	859	3750	2166	4237	9188	6949	7413	1448	501	1251	3921	1933	1970	1861	1408	839	607	543	374	573	1641	4	1540	846	545	417	169	466	783	523	1028	1054	199
X190	Dinophyceae	Dinophysiales	Dinophysiaceae	Dinophysis	Dinophysis_sp.	0	0	0	0	0	0	0	0	0	0	0	0	0	0	0	0	0	0	0	0	0	0	0	0	0	0	0	0	0	0	0	0	7	0	0	0	0	0	0	0	0	0	0	0
X1505	Dinophyceae	Gonyaulacales	Pyrophacaceae	Fragilidium	Fragilidium_sp.	0	0	0	0	0	0	0	0	0	0	0	0	0	0	0	0	0	0	0	0	0	0	0	0	0	0	0	0	0	0	0	118	0	0	0	0	0	0	0	0	0	0	0	0
X2352	Dinophyceae	Gymnodiniales	Gymnodiniaceae	Gymnodinium	Gymnodinium_microreticulatum	0	0	0	0	0	0	0	0	0	0	0	0	0	0	0	30	0	0	0	0	0	0	0	0	0	0	0	0	0	0	0	0	0	0	0	0	0	0	0	0	0	0	0	0
X2556	Dinophyceae	Gymnodiniales	Gymnodiniaceae	Gymnodinium	NA	1	0	0	1	0	0	0	7	0	0	0	0	0	0	0	0	0	7	0	0	0	0	0	0	0	0	0	0	0	0	0	0	0	0	0	0	0	0	0	0	0	0	0	0
X3036	Dinophyceae	Gymnodiniales	Gymnodiniaceae	Gymnodinium	NA	0	0	0	0	0	0	0	0	0	0	0	0	0	0	0	0	0	0	0	0	0	0	0	1	0	0	0	0	2	2	0	0	0	0	0	0	0	0	0	0	1	2	0	1
X3360	Dinophyceae	Gymnodiniales	Gymnodiniaceae	Gymnodinium	NA	0	0	0	0	0	0	0	0	0	0	0	0	0	0	0	0	0	0	0	0	0	0	0	0	0	0	0	0	0	0	0	0	0	0	0	0	0	0	0	0	0	0	0	0
X3526	Dinophyceae	Gymnodiniales	Gymnodiniaceae	Gymnodinium	NA	0	0	0	0	0	0	0	0	0	0	0	0	0	0	0	0	0	0	0	0	0	0	0	0	0	0	0	0	0	0	0	0	0	0	0	0	0	0	0	0	0	0	0	0
X1063	Dinophyceae	Gymnodiniales	Gymnodiniaceae	Gyrodinium	Gyrodinium_fusiforme	0	0	0	0	0	0	0	0	0	0	0	0	0	0	0	0	0	0	0	0	0	0	0	0	0	0	0	2	1	0	0	3	3	0	0	2	2	0	2	3	0	0	0	1
X11	Dinophyceae	Gymnodiniales	Gymnodiniaceae	Gyrodinium	Gyrodinium_fusiforme	10	6	41	42	25	12	47	102	87	198	69	52	143	86	321	666	528	327	167	306	23	248	83	139	252	303	323	949	847	512	271	1003	1720	511	236	152	735	286	605	1649	283	1051	486	171
X1110	Dinophyceae	Gymnodiniales	Gymnodiniaceae	Gyrodinium	Gyrodinium_fusiforme	0	0	0	0	0	0	0	1	0	0	0	0	0	0	0	1	0	0	0	0	0	0	0	0	0	0	0	5	4	1	0	11	6	2	0	0	2	1	1	8	0	1	1	0
X1154	Dinophyceae	Gymnodiniales	Gymnodiniaceae	Gyrodinium	Gyrodinium_spirale	0	0	0	0	0	0	0	0	0	0	0	0	0	0	0	0	1	0	0	0	0	0	0	0	0	0	0	0	0	0	0	0	13	0	0	0	0	0	0	0	0	0	0	0
X1256	Dinophyceae	Gymnodiniales	Gymnodiniaceae	Gyrodinium	NA	0	0	0	0	0	0	0	0	0	0	0	0	0	0	0	0	0	0	0	1	0	0	0	2	0	0	0	0	1	1	0	7	3	0	0	2	4	0	0	0	0	0	2	0
X1365	Dinophyceae	Gymnodiniales	Gymnodiniaceae	Gyrodinium	Gyrodinium_fusiforme	0	0	0	0	0	0	0	0	0	0	0	0	0	0	0	0	0	0	0	0	0	0	0	0	0	0	0	0	0	0	0	0	0	0	0	0	0	0	0	0	0	0	0	0
X1402	Dinophyceae	Gymnodiniales	Gymnodiniaceae	Gyrodinium	NA	0	0	0	0	0	0	0	0	0	0	0	0	0	0	0	0	2	0	0	0	0	0	0	0	0	0	1	1	4	0	0	5	2	0	0	0	1	1	0	2	0	0	1	0
X1459	Dinophyceae	Gymnodiniales	Gymnodiniaceae	Gyrodinium	Gyrodinium_fusiforme	0	0	0	0	0	0	0	0	0	0	0	0	0	0	0	0	0	0	0	0	0	0	0	1	0	0	0	0	1	0	0	0	3	1	1	0	0	0	2	2	0	2	0	0
X149	Dinophyceae	Gymnodiniales	Gymnodiniaceae	Gyrodinium	Gyrodinium_rubrum	4	5	19	15	22	17	14	40	39	90	18	19	97	104	231	343	194	202	61	21	51	146	34	159	120	146	98	116	154	101	113	152	2	53	36	50	103	80	131	379	584	476	224	79
X1548	Dinophyceae	Gymnodiniales	Gymnodiniaceae	Gyrodinium	NA	0	0	0	0	0	0	0	0	0	0	0	0	0	0	0	0	0	0	0	0	0	0	0	0	0	0	0	1	0	0	0	1	2	0	0	0	3	0	0	2	0	3	0	0
X1567	Dinophyceae	Gymnodiniales	Gymnodiniaceae	Gyrodinium	Gyrodinium_fusiforme	0	0	0	0	0	0	0	0	0	0	0	0	0	0	0	0	3	0	0	0	0	0	0	0	0	0	0	0	0	0	0	0	4	0	0	0	0	0	2	0	0	0	1	0
X1604	Dinophyceae	Gymnodiniales	Gymnodiniaceae	Gyrodinium	Gyrodinium_fusiforme	0	0	0	0	0	0	0	0	0	0	0	0	0	0	0	0	0	0	0	0	0	0	0	0	0	0	0	0	0	0	0	0	0	0	0	0	0	0	0	0	0	1	0	0
X1724	Dinophyceae	Gymnodiniales	Gymnodiniaceae	Gyrodinium	NA	0	0	0	1	0	0	0	3	1	4	0	1	5	3	8	8	4	2	4	0	1	6	1	1	0	1	0	2	0	1	1	1	0	0	0	0	0	0	0	1	0	0	0	0
X1751	Dinophyceae	Gymnodiniales	Gymnodiniaceae	Gyrodinium	Gyrodinium_fusiforme	0	0	0	0	0	0	0	0	0	0	0	0	0	0	0	0	0	0	0	2	0	0	0	0	1	0	0	2	0	0	0	0	3	0	0	0	0	0	1	0	0	0	0	0
X18	Dinophyceae	Gymnodiniales	Gymnodiniaceae	Gyrodinium	Gyrodinium_gutrula	381	217	440	738	680	742	900	1022	1111	2675	1329	594	2329	1736	2968	4774	2136	2945	762	308	685	2403	873	1396	1110	734	719	1146	768	1211	793	2288	28	1349	561	359	973	687	1428	2645	1268	1497	794	452
X1982	Dinophyceae	Gymnodiniales	Gymnodiniaceae	Gyrodinium	Gyrodinium_fusiforme	0	0	0	0	0	0	0	0	0	0	0	0	0	0	0	0	0	0	0	1	0	0	0	0	0	0	0	1	0	0	0	0	2	0	0	0	0	0	0	0	0	0	0	0
X2013	Dinophyceae	Gymnodiniales	Gymnodiniaceae	Gyrodinium	NA	0	0	0	0	0	0	0	0	0	0	0	0	0	0	0	0	0	0	0	0	0	0	0	0	0	1	0	4	2	1	0	1	3	0	1	1	0	0	0	4	0	1	0	1
X2026	Dinophyceae	Gymnodiniales	Gymnodiniaceae	Gyrodinium	Gyrodinium_gutrula	0	1	0	0	0	2	0	1	1	0	0	0	0	1	0	1	0	49	0	0	0	1	0	0	0	0	0	0	0	2	0	0	0	1	0	0	0	0	0	1	0	0	2	0
X2031	Dinophyceae	Gymnodiniales	Gymnodiniaceae	Gyrodinium	Gyrodinium_fusiforme	0	0	0	0	0	0	0	0	0	0	0	0	0	0	0	0	0	0	0	0	0	0	0	0	0	0	0	2	2	0	0	1	0	0	0	0	1	0	0	0	0	0	0	0
X2033	Dinophyceae	Gymnodiniales	Gymnodiniaceae	Gyrodinium	Gyrodinium_fusiforme	0	0	0	0	0	0	0	0	0	0	0	0	0	0	0	0	0	0	0	0	0	0	0	0	0	1	0	2	0	0	0	2	2	0	2	0	0	0	1	1	0	0	2	1
X2081	Dinophyceae	Gymnodiniales	Gymnodiniaceae	Gyrodinium	NA	0	0	0	0	0	0	0	0	0	0	0	0	0	0	0	0	0	0	0	0	0	0	0	0	0	0	0	0	0	0	0	0	0	0	0	0	0	0	0	0	0	0	0	0
X2281	Dinophyceae	Gymnodiniales	Gymnodiniaceae	Gyrodinium	Gyrodinium_fusiforme	0	0	0	0	0	0	0	0	0	0	0	0	0	0	0	0	0	0	0	0	0	0	0	0	0	0	0	0	3	0	0	0	1	0	0	0	0	0	1	0	0	0	0	0
X2414	Dinophyceae	Gymnodiniales	Gymnodiniaceae	Gyrodinium	NA	0	0	0	0	0	0	0	0	0	0	0	0	0	0	0	0	0	0	0	0	0	0	0	0	0	0	0	0	0	0	0	0	0	0	0	0	0	0	0	0	0	0	0	0
X2750	Dinophyceae	Gymnodiniales	Gymnodiniaceae	Gyrodinium	Gyrodinium_fusiforme	0	0	0	0	0	0	0	0	0	0	0	0	0	0	0	0	0	0	0	0	0	0	0	0	0	0	0	0	0	0	0	0	0	0	0	0	1	0	0	0	0	1	0	0
X2763	Dinophyceae	Gymnodiniales	Gymnodiniaceae	Gyrodinium	Gyrodinium_gutrula	0	0	0	0	2	1	0	0	2	7	1	3	4	0	0	0	0	1	0	0	0	1	0	0	0	0	0	0	0	1	0	0	0	1	0	0	0	0	0	1	0	1	0	0
X2813	Dinophyceae	Gymnodiniales	Gymnodiniaceae	Gyrodinium	NA	0	0	0	0	0	0	0	0	0	0	0	0	0	0	0	0	0	0	0	0	0	0	0	0	0	1	0	0	1	1	0	0	1	0	0	0	0	0	0	0	0	0	0	0
X3316	Dinophyceae	Gymnodiniales	Gymnodiniaceae	Gyrodinium	NA	0	0	0	0	1	0	0	0	0	0	0	0	2	0	0	2	0	0	0	0	0	0	0	0	0	0	0	0	0	0	0	0	0	0	0	0	1	0	0	0	0	0	0	0
X3459	Dinophyceae	Gymnodiniales	Gymnodiniaceae	Gyrodinium	Gyrodinium_gutrula	0	0	0	0	0	0	0	0	0	0	0	0	1	0	0	1	2	4	0	0	0	0	0	0	0	0	0	5	0	0	1	0	0	0	0	0	0	0	0	0	0	1	0	0
X3493	Dinophyceae	Gymnodiniales	Gymnodiniaceae	Gyrodinium	Gyrodinium_gutrula	0	0	0	1	0	1	0	0	1	0	0	0	0	0	2	2	1	0	0	0	0	0	0	0	0	0	0	0	2	0	0	0	0	0	0	0	0	0	0	0	0	2	0	0
X3662	Dinophyceae	Gymnodiniales	Gymnodiniaceae	Gyrodinium	Gyrodinium_gutrula	0	0	0	1	0	0	0	0	0	1	0	1	1	0	1	0	0	0	0	0	1	0	0	0	2	0	0	0	0	1	0	0	0	0	0	0	0	0	0	0	0	0	0	0
X3663	Dinophyceae	Gymnodiniales	Gymnodiniaceae	Gyrodinium	Gyrodinium_gutrula	0	0	0	0	0	0	0	0	0	1	0	0	0	0	0	2	0	0	0	0	1	1	0	0	0	0	0	0	0	1	0	0	0	0	0	0	0	0	0	0	0	0	0	0
X3678	Dinophyceae	Gymnodiniales	Gymnodiniaceae	Gyrodinium	Gyrodinium_gutrula	0	0	0	0	0	0	0	1	0	0	0	0	0	1	1	1	0	0	0	0	0	1	0	0	0	0	0	0	0	1	0	0	0	2	0	0	0	0	0	0	0	0	0	0
X3719	Dinophyceae	Gymnodiniales	Gymnodiniaceae	Gyrodinium	NA	0	0	0	0	0	1	0	0	0	0	0	0	2	3	0	0	0	1	0	0	0	0	0	0	0	0	0	0	0	0	0	1	0	0	0	0	2	0	0	0	0	0	0	0
X3767	Dinophyceae	Gymnodiniales	Gymnodiniaceae	Gyrodinium	NA	0	0	0	0	0	0	0	0	2	0	2	0	0	0	0	2	0	1	0	0	2	0	1	0	0	0	0	0	0	0	0	0	0	0	1	0	1	0	0	0	0	0	0	0
X4226	Dinophyceae	Gymnodiniales	Gymnodiniaceae	Gyrodinium	NA	0	0	0	0	0	0	0	0	0	0	0	0	0	0	0	0	0	0	0	0	0	0	0	0	0	0	0	0	0	0	0	0	0	0	0	0	0	0	0	0	0	0	0	0
X4454	Dinophyceae	Gymnodiniales	Gymnodiniaceae	Gyrodinium	Gyrodinium_gutrula	0	0	0	0	0	0	0	0	0	0	0	0	0	0	0	0	0	0	0	0	0	0	0	0	0	0	0	0	0	0	0	0	0	0	0	0	0	0	0	0	0	0	0	0
X533	Dinophyceae	Gymnodiniales	Gymnodiniaceae	Gyrodinium	NA	0	0	0	0	0	0	0	0	0	0	0	0	0	0	0	1	0	0	0	0	0	0	0	0	0	0	0	0	0	1	0	0	1	1	0	0	0	0	1	3	0	0	2	0
X56	Dinophyceae	Gymnodiniales	Gymnodiniaceae	Gyrodinium	Gyrodinium_rubrum	0	18	1	0	0	0	0	0	0	1	0	0	3	49	42	199	62	75	18	13	41	192	5	67	99	59	111	109	128	81	108	42	0	58	29	68	750	798	1875	1992	2517	4379	4496	1036
X701	Dinophyceae	Gymnodiniales	Gymnodiniaceae	Gyrodinium	Gyrodinium_fusiforme	0	0	0	0	0	0	0	0	0	0	0	0	0	0	0	0	0	0	0	0	0	0	0	0	0	0	0	0	0	0	0	0	0	0	0	0	0	0	2	1	0	0	0	0
X805	Dinophyceae	Gymnodiniales	Gymnodiniaceae	Gyrodinium	Gyrodinium_fusiforme	0	0	0	0	0	0	0	0	0	2	0	0	0	0	0	0	1	0	0	1	0	1	0	0	0	0	1	4	3	1	0	3	5	2	0	0	3	1	1	5	1	1	2	0
X829	Dinophyceae	Gymnodiniales	Gymnodiniaceae	Gyrodinium	Gyrodinium_spirale	0	0	0	0	0	0	0	0	0	0	0	0	0	0	0	0	1	0	0	0	0	0	0	0	0	0	0	0	1	1	0	0	4	0	0	0	0	0	0	2	0	0	0	0
X860	Dinophyceae	Gymnodiniales	Gymnodiniaceae	Gyrodinium	Gyrodinium_fusiforme	0	0	0	0	0	0	0	0	0	0	0	0	0	0	0	0	1	0	0	0	0	0	0	0	1	1	0	6	4	1	0	7	14	1	1	2	3	3	3	3	0	0	2	0
X927	Dinophyceae	Gymnodiniales	Gymnodiniaceae	Gyrodinium	Gyrodinium_fusiforme	0	0	0	0	0	0	0	0	0	0	0	0	0	0	0	0	0	0	0	0	0	0	0	1	1	0	0	0	0	1	0	0	6	1	1	0	0	0	1	4	1	2	0	0
X973	Dinophyceae	Gymnodiniales	Gymnodiniaceae	Gyrodinium	Gyrodinium_fusiforme	0	0	0	0	0	0	0	0	0	0	0	0	0	0	0	0	2	0	0	0	0	0	0	0	1	0	0	1	5	2	0	2	5	3	0	1	2	1	5	4	0	2	0	1
X2744	Dinophyceae	Peridiniales	Heterocapsaceae	Heterocapsa	Heterocapsa_triquetra	0	0	0	0	0	0	0	0	0	0	0	0	0	0	0	0	0	0	0	2	0	0	0	0	0	0	0	0	0	0	0	0	0	0	0	0	0	0	0	0	0	0	0	0
X31	Dinophyceae	Peridiniales	Heterocapsaceae	Heterocapsa	Heterocapsa_nei/rotundata	262	203	290	624	700	295	457	435	258	1142	443	355	601	351	835	674	205	507	131	12	116	308	127	495	854	813	1201	797	450	347	226	567	8	627	252	299	911	932	1653	4330	857	1042	398	171
X3731	Dinophyceae	Peridiniales	Heterocapsaceae	Heterocapsa	Heterocapsa_nei/rotundata	0	0	0	0	0	0	1	0	0	0	0	1	1	0	0	0	0	0	0	0	0	0	0	0	0	0	0	0	0	0	0	0	0	0	0	1	0	0	0	0	0	0	0	1
X724	Dinophyceae	Peridiniales	Heterocapsaceae	Heterocapsa	Heterocapsa_triquetra	0	0	0	0	0	0	0	0	0	0	0	0	0	1	0	0	0	0	0	0	0	0	0	0	0	0	0	0	0	0	0	0	2	1	0	0	0	0	0	0	0	0	0	0
X964	Dinophyceae	Peridiniales	Heterocapsaceae	Heterocapsa	Heterocapsa_nei/rotundata	2	1	3	0	4	0	4	0	2	8	1	2	0	0	3	6	1	6	1	0	0	1	1	5	1	7	5	6	4	1	3	2	0	4	2	1	4	6	6	16	3	3	1	1
X1296	Dinophyceae	Peridiniales	Amphidiniopsidaceae	Islandinium	Islandinium_tricingulatum	0	0	0	0	0	0	0	0	0	0	0	0	0	0	0	0	0	0	0	0	0	0	0	0	0	0	0	0	0	0	0	0	0	0	0	0	0	0	0	0	0	0	0	0
X1700	Dinophyceae	Peridiniales	Amphidiniopsidaceae	Islandinium	Islandinium_tricingulatum	0	0	0	0	0	0	0	0	0	0	0	0	0	0	0	0	0	0	0	0	0	0	0	0	0	0	0	0	0	0	0	0	0	0	0	0	0	0	0	0	0	0	0	0
X683	Dinophyceae	Peridiniales	Amphidiniopsidaceae	Islandinium	Islandinium_tricingulatum	0	0	1	0	0	0	0	0	0	0	0	0	0	0	0	0	0	0	0	0	0	0	0	0	0	0	0	0	0	0	0	0	0	0	0	0	0	0	0	0	0	0	0	0
X743	Dinophyceae	Peridiniales	Amphidiniopsidaceae	Islandinium	Islandinium_minutum	0	0	0	0	0	0	0	0	0	0	0	0	0	0	0	0	0	0	0	0	0	0	0	0	0	0	0	0	0	0	0	0	6	0	0	0	0	0	0	1	0	0	0	0
X6	Dinophyceae	Gymnodiniales	Kareniaceae	Karenia	Karenia_brevis	440	461	787	1104	1198	1174	1429	1770	1500	4210	1873	1239	6131	4107	11211	18837	8771	9802	7665	1430	8370	21850	6045	3323	3458	4419	3229	1779	1545	2043	1422	2128	32	2236	984	717	801	501	989	1003	589	939	1032	376
X240	Dinophyceae	Gymnodiniales	Kareniaceae	Karlodinium	Karlodinium_veneficum	15	5	9	13	10	5	7	5	1	10	0	3	2	0	6	8	0	2	4	0	2	7	1	0	0	1	2	0	1	2	0	0	0	0	0	1	1	0	0	0	0	0	1	0
X567	Dinophyceae	Gymnodiniales	Kareniaceae	Karlodinium	NA	5	3	14	18	9	22	13	17	19	48	12	7	28	7	24	64	6	13	11	0	1	20	2	1	7	6	24	13	8	12	5	0	0	0	4	1	0	1	0	1	0	5	0	0
X2500	Dinophyceae	Gymnodiniales	Gymnodiniaceae	Margalefidinium	Margalefidinium_fulvescens	0	0	0	0	0	0	0	0	0	0	0	0	0	0	0	0	0	0	0	0	0	0	0	0	0	0	0	0	0	0	0	0	0	0	0	0	0	0	0	0	0	0	0	0
X1412	Dinophyceae	Gonyaulacales	NA	NA	NA	0	0	0	0	0	0	0	0	0	0	0	0	0	0	0	0	0	0	0	0	0	0	0	0	0	0	0	0	0	0	0	0	0	0	0	0	0	0	0	0	0	0	0	0
X1878	Dinophyceae	Gonyaulacales	NA	NA	NA	0	0	0	0	0	0	0	0	0	0	0	0	0	0	0	0	0	0	0	0	0	0	0	0	0	0	0	0	0	0	0	0	0	0	0	0	0	0	0	0	0	0	0	0
X1286	Dinophyceae	Gymnodiniales	NA	NA	NA	0	0	1	0	0	11	0	6	0	0	0	0	1	1	0	1	1	127	0	0	0	0	0	0	0	0	0	0	0	0	0	0	0	0	0	0	0	0	0	0	0	0	1	0
X13	Dinophyceae	Gymnodiniales	NA	NA	NA	9	22	24	27	26	44	42	10	20	17	1	16	96	64	113	339	173	342	119	43	37	179	71	447	372	595	498	1966	1844	2126	1798	1756	23	655	255	158	487	319	939	2256	1289	1272	1145	538
X1515	Dinophyceae	Gymnodiniales	Gymnodiniaceae	NA	NA	0	0	0	0	0	2	1	0	2	4	0	0	0	2	2	2	2	1	0	0	0	1	0	0	0	0	0	0	0	0	0	2	0	2	1	0	0	0	0	0	0	3	0	0
X1596	Dinophyceae	Gymnodiniales	Gymnodiniaceae	NA	NA	0	0	0	0	0	0	0	0	0	0	0	0	0	0	0	0	0	0	0	1	0	0	0	0	0	0	0	6	0	1	0	1	4	0	0	0	1	0	0	3	0	0	0	0
X1855	Dinophyceae	Gymnodiniales	NA	NA	NA	0	0	0	0	0	0	0	0	0	0	0	0	0	0	0	0	0	0	0	0	0	0	0	0	0	0	0	0	0	0	0	0	0	0	0	0	0	0	0	0	0	0	0	0
X1876	Dinophyceae	Gymnodiniales	NA	NA	NA	0	0	0	0	0	0	0	0	0	0	0	0	0	0	0	0	0	0	0	0	0	0	0	0	0	0	0	0	0	0	0	1	6	1	0	0	1	1	0	0	0	0	0	0
X189	Dinophyceae	Gymnodiniales	Gymnodiniaceae	NA	NA	19	4	9	32	7	11	6	29	48	73	40	28	36	23	44	104	27	10	23	7	8	46	31	10	92	71	51	103	57	82	103	147	5	76	72	67	18	19	75	139	76	152	27	17
X1975	Dinophyceae	Gymnodiniales	Gymnodiniaceae	NA	NA	0	0	0	1	0	0	0	0	2	9	4	2	9	0	3	5	0	1	0	0	11	3	0	0	1	0	0	0	0	0	0	0	0	0	0	0	0	0	0	0	0	1	0	0
X201	Dinophyceae	Gymnodiniales	NA	NA	NA	1	0	0	5	0	0	1	0	0	0	0	0	3	0	0	0	0	0	0	0	0	0	0	0	0	0	0	0	0	0	0	0	0	0	5	0	3	0	6	0	0	8	0	0
X2128	Dinophyceae	Gymnodiniales	NA	NA	NA	0	0	0	2	2	0	0	0	0	0	0	0	0	1	0	0	0	1	0	0	0	0	0	0	0	0	0	0	0	0	1	0	0	0	1	0	1	1	0	1	0	0	0	1
X2331	Dinophyceae	Gymnodiniales	NA	NA	NA	0	0	0	0	0	0	1	0	0	2	1	0	1	0	0	0	3	1	0	0	0	0	0	0	0	0	0	0	0	0	0	2	0	2	0	0	0	0	0	0	0	0	0	0
X2445	Dinophyceae	Gymnodiniales	Gymnodiniaceae	NA	NA	0	0	0	0	0	0	0	0	0	0	0	0	0	0	0	0	0	0	0	0	0	0	0	0	0	0	0	0	0	0	0	0	0	0	0	0	0	0	0	0	0	0	0	0
X2458	Dinophyceae	Gymnodiniales	NA	NA	NA	0	0	0	0	0	0	0	0	0	0	0	0	0	0	0	3	2	4	1	1	1	2	1	0	0	0	1	0	0	0	0	0	0	0	0	0	0	0	0	0	0	0	0	0
X2581	Dinophyceae	Gymnodiniales	NA	NA	NA	0	2	0	3	4	1	10	0	5	2	0	0	2	0	0	0	0	0	0	0	2	0	0	1	0	0	0	0	0	0	0	0	0	0	0	0	0	0	0	0	0	0	0	0
X2598	Dinophyceae	Gymnodiniales	NA	NA	NA	0	0	0	0	0	0	0	0	0	0	0	0	0	0	0	0	0	0	0	0	0	0	0	0	0	0	0	0	0	0	0	0	0	0	0	0	0	0	0	0	0	0	0	0
X2690	Dinophyceae	Gymnodiniales	Gymnodiniaceae	NA	NA	0	0	0	0	0	0	0	0	0	0	0	0	0	0	0	0	0	0	0	0	0	0	0	0	0	0	0	0	0	0	0	0	0	0	0	0	0	0	0	0	0	0	0	0
X2925	Dinophyceae	Gymnodiniales	NA	NA	NA	0	0	0	0	0	0	0	0	0	0	0	0	0	0	0	1	0	0	0	0	0	0	0	0	0	0	0	0	0	0	0	0	0	0	0	0	0	0	0	0	0	0	0	0
X293	Dinophyceae	Gymnodiniales	NA	NA	NA	0	5	1	36	4	16	32	24	35	63	34	38	73	43	169	105	59	60	12	5	9	59	29	39	49	51	54	5	19	30	48	54	0	126	65	34	26	38	20	65	7	18	6	0
X2950	Dinophyceae	Gymnodiniales	NA	NA	NA	0	0	0	0	0	0	0	0	0	2	0	0	0	0	0	0	0	0	0	0	0	0	0	0	0	0	0	0	0	0	0	0	0	0	0	0	0	0	0	0	0	0	0	0
X2965	Dinophyceae	Gymnodiniales	Gymnodiniaceae	NA	NA	0	0	0	0	0	0	0	0	0	0	0	0	0	0	0	0	0	0	0	0	0	0	0	0	0	0	0	0	0	0	0	0	0	0	0	0	0	0	0	0	0	0	0	0
X2966	Dinophyceae	Gymnodiniales	NA	NA	NA	0	0	0	0	0	0	0	0	0	0	0	0	0	0	0	0	0	0	0	0	0	0	0	0	0	0	0	0	0	0	0	0	0	0	0	0	0	0	0	0	0	0	0	0
X3128	Dinophyceae	Gymnodiniales	NA	NA	NA	0	0	0	1	0	1	0	0	1	0	0	0	0	0	0	0	0	0	0	0	0	0	0	0	0	0	0	6	0	0	0	0	0	0	0	0	0	0	0	0	0	0	0	0
X3247	Dinophyceae	Gymnodiniales	NA	NA	NA	0	0	0	0	0	0	0	0	0	0	0	0	0	0	0	0	0	0	0	0	0	0	0	0	0	0	1	0	0	0	0	0	0	0	0	0	0	0	0	0	0	0	0	0
X3306	Dinophyceae	Gymnodiniales	NA	NA	NA	0	0	0	0	0	0	0	0	0	0	0	0	0	0	0	0	0	0	0	0	0	0	0	0	0	0	0	0	0	0	0	0	0	0	0	0	0	0	0	0	0	0	0	0
X3309	Dinophyceae	Gymnodiniales	NA	NA	NA	0	0	0	0	0	0	0	0	0	0	0	0	0	0	0	0	0	0	0	0	0	0	0	0	0	0	0	0	0	0	0	0	0	0	0	0	0	0	0	0	0	0	0	0
X3366	Dinophyceae	Gymnodiniales	NA	NA	NA	0	0	0	0	0	0	0	0	0	0	0	0	0	0	0	0	0	0	0	0	0	0	0	0	0	0	0	0	0	0	0	0	0	0	0	0	0	0	0	0	0	0	0	0
X3471	Dinophyceae	Gymnodiniales	NA	NA	NA	0	0	0	0	0	0	0	0	0	0	0	0	0	0	0	0	0	0	0	0	0	0	0	0	0	0	0	1	0	0	0	0	0	0	0	0	0	0	0	0	0	0	0	0
X3527	Dinophyceae	Gymnodiniales	NA	NA	NA	0	0	0	0	0	0	0	0	0	0	0	0	0	0	0	0	0	0	0	0	0	0	0	0	0	0	0	0	0	0	0	0	0	0	0	0	0	0	0	0	0	0	0	0
X3578	Dinophyceae	Gymnodiniales	NA	NA	NA	0	0	0	0	0	0	0	0	0	0	0	0	0	0	0	0	0	0	0	0	0	0	0	0	0	0	0	0	0	0	0	0	0	0	0	0	0	0	0	0	0	0	0	0
X3637	Dinophyceae	Gymnodiniales	Gymnodiniaceae	NA	NA	0	0	0	0	0	0	0	0	0	0	0	0	0	0	0	0	0	0	0	0	0	0	0	0	0	0	0	0	0	0	0	0	0	0	0	0	0	0	0	0	0	0	0	0
X3642	Dinophyceae	Gymnodiniales	NA	NA	NA	0	0	0	0	0	0	0	0	0	0	0	0	0	0	0	0	0	0	0	0	0	0	0	0	0	0	0	0	0	0	0	0	0	0	0	0	0	0	0	0	0	0	0	0
X3651	Dinophyceae	Gymnodiniales	NA	NA	NA	0	0	0	0	0	1	3	0	1	0	1	0	1	0	0	1	0	1	0	0	0	0	0	0	0	0	0	0	0	0	0	0	0	0	0	0	0	0	0	0	0	0	0	0
X3684	Dinophyceae	Gymnodiniales	Gymnodiniaceae	NA	NA	0	0	0	0	0	0	0	0	0	0	0	0	0	0	0	0	0	1	0	0	0	1	0	0	0	0	0	0	0	0	0	0	0	0	1	0	0	0	0	0	0	0	0	0
X3687	Dinophyceae	Gymnodiniales	NA	NA	NA	0	0	0	0	0	0	0	0	0	0	0	0	0	0	0	0	0	0	0	0	0	0	0	0	0	0	0	0	0	2	0	0	0	0	0	0	0	0	0	0	0	0	0	0
X3693	Dinophyceae	Gymnodiniales	NA	NA	NA	0	0	0	0	0	0	0	0	0	0	0	0	0	0	0	0	0	0	0	0	0	0	0	0	0	0	0	0	0	0	0	0	0	0	0	0	0	0	0	0	0	0	0	0
X3722	Dinophyceae	Gymnodiniales	Chytriodiniaceae	NA	NA	0	0	0	1	0	0	0	0	0	2	0	1	1	0	0	0	0	0	0	1	0	1	0	0	0	0	0	0	0	0	0	0	0	0	0	0	0	0	0	0	0	0	0	0
X3755	Dinophyceae	Gymnodiniales	NA	NA	NA	0	0	0	0	0	0	0	0	0	0	0	0	0	0	0	0	0	0	0	0	0	0	0	0	0	0	0	0	0	0	0	0	0	0	0	0	0	0	0	0	0	0	0	0
X3757	Dinophyceae	Gymnodiniales	NA	NA	NA	0	0	0	0	0	0	0	0	0	0	0	0	0	0	0	0	0	0	0	0	0	0	0	0	0	0	0	0	0	0	0	0	0	0	0	0	0	0	0	0	0	0	0	0
X3814	Dinophyceae	Gymnodiniales	NA	NA	NA	0	0	0	0	0	0	0	0	0	0	0	0	0	0	0	0	0	0	0	0	0	0	0	0	0	0	0	0	0	0	0	0	0	0	0	0	0	0	0	0	0	0	0	0
X3943	Dinophyceae	Gymnodiniales	Gymnodiniaceae	NA	NA	0	0	0	0	0	0	0	0	0	0	0	0	0	0	0	0	0	0	0	0	0	0	0	0	0	0	0	0	0	0	0	0	0	0	0	0	0	0	0	1	0	0	0	0
X40	Dinophyceae	Gymnodiniales	NA	NA	NA	0	0	0	0	0	0	0	0	0	0	0	0	0	0	1	0	0	13	0	1	0	3	0	3	0	0	4	2	0	0	0	3	0	0	1	1	0	2	0	0	0	4	0	0
X4221	Dinophyceae	Gymnodiniales	NA	NA	NA	0	0	0	0	0	0	0	0	0	0	0	0	0	0	0	0	0	0	0	0	0	0	0	0	0	0	0	0	0	0	0	0	0	0	0	0	0	0	0	0	0	1	0	0
X500	Dinophyceae	Gymnodiniales	NA	NA	NA	69	28	56	153	0	2	0	0	0	0	0	0	0	25	0	0	0	0	0	2	0	66	0	0	4	0	0	0	0	0	0	0	0	0	0	0	1	0	0	0	0	0	0	0
X624	Dinophyceae	Gymnodiniales	NA	NA	NA	0	4	6	3	7	4	7	4	3	16	3	4	10	4	11	29	22	19	7	1	3	16	5	4	5	4	1	3	4	1	2	3	0	4	1	1	3	0	2	3	3	4	2	1
X657	Dinophyceae	Gymnodiniales	NA	NA	NA	1	0	0	1	0	0	0	0	0	0	0	0	2	0	0	0	2	2	1	0	0	2	1	1	0	1	1	5	9	5	3	9	0	3	2	0	4	1	1	6	4	6	3	1
X68	Dinophyceae	Gymnodiniales	NA	NA	NA	2	21	25	126	62	55	214	157	178	525	284	170	757	397	1167	764	380	650	58	14	47	366	186	403	521	378	570	65	102	348	540	821	28	1143	563	298	244	234	374	536	281	85	157	11
X705	Dinophyceae	Gymnodiniales	Kareniaceae	NA	NA	16	14	15	12	1	23	14	14	3	24	5	4	9	3	16	11	2	4	5	0	5	6	0	1	3	3	7	4	8	4	0	6	0	4	0	5	2	7	3	12	7	8	0	8
X783	Dinophyceae	Gymnodiniales	NA	NA	NA	0	0	0	0	0	0	0	0	0	0	2	0	1	0	0	0	0	0	0	0	0	0	0	0	0	1	0	0	0	0	0	0	0	0	0	0	1	0	5	4	2	20	3	1
X814	Dinophyceae	Gymnodiniales	Gymnodiniaceae	NA	NA	0	0	0	0	0	0	0	0	0	0	0	0	0	0	1	0	0	0	0	0	0	0	0	0	0	0	0	0	0	1	0	0	1	0	0	0	0	0	0	0	0	1	0	0
X833	Dinophyceae	Gymnodiniales	NA	NA	NA	0	0	0	1	0	0	3	0	0	0	0	0	1	0	0	1	0	1	0	0	0	0	0	1	4	0	3	6	6	9	12	4	0	0	0	2	2	0	1	2	2	1	3	1
X925	Dinophyceae	Gymnodiniales	NA	NA	NA	3	4	0	15	3	8	20	21	0	12	7	2	11	1	10	22	0	4	0	0	1	2	0	0	0	0	3	1	3	1	0	0	0	0	0	4	0	0	0	0	0	0	0	2
X992	Dinophyceae	Gymnodiniales	Gymnodiniaceae	NA	NA	0	6	0	0	0	1	4	0	0	0	3	3	3	17	20	6	7	0	11	1	6	6	7	4	0	23	76	5	5	0	6	3	0	3	0	3	0	0	0	0	0	0	0	0
X1035	Dinophyceae	NA	NA	NA	NA	20	9	4	12	8	6	13	4	1	9	0	0	3	2	2	3	1	0	2	1	1	1	0	0	0	0	1	0	3	1	0	0	1	0	0	0	0	0	1	1	0	0	2	1
X1071	Dinophyceae	NA	NA	NA	NA	0	0	1	0	0	0	0	1	0	0	0	0	1	0	1	0	5	9	0	1	1	0	1	0	0	0	0	0	1	2	0	0	0	0	1	0	0	0	0	0	0	1	1	0
X108	Dinophyceae	NA	NA	NA	NA	20	72	4	200	115	25	279	143	102	141	357	46	67	205	249	246	103	205	53	28	77	89	133	60	3	0	29	182	0	35	70	155	0	339	43	0	14	42	297	80	58	112	0	23
X1144	Dinophyceae	NA	NA	NA	NA	2	0	4	0	0	0	2	0	0	4	0	0	2	0	0	5	0	0	0	0	0	0	0	1	0	0	0	1	0	0	0	0	0	0	2	0	0	0	0	5	1	9	0	1
X1184	Dinophyceae	NA	NA	NA	NA	11	12	2	42	23	6	10	14	4	22	5	3	0	6	0	0	0	0	1	0	0	0	0	0	0	0	0	0	0	0	0	0	0	0	0	0	0	0	0	0	0	0	0	0
X1187	Dinophyceae	NA	NA	NA	NA	0	0	0	0	0	0	0	0	0	0	0	0	0	1	4	3	0	4	0	2	1	7	1	1	1	0	0	0	0	0	0	0	0	0	0	0	0	0	0	0	0	0	0	0
X1239	Dinophyceae	NA	NA	NA	NA	0	0	0	0	0	0	0	0	0	0	0	0	0	0	0	0	0	0	0	0	0	0	0	0	0	0	0	0	3	0	0	0	0	2	2	0	0	0	2	3	0	1	0	0
X1260	Dinophyceae	NA	NA	NA	NA	0	0	0	0	0	0	0	0	0	0	0	0	0	0	0	0	0	0	0	0	0	0	0	0	0	0	0	0	0	0	0	0	0	0	1	0	0	0	0	0	0	0	0	0
X1270	Dinophyceae	NA	NA	NA	NA	0	1	3	7	8	4	2	4	4	4	1	3	8	2	8	8	6	8	3	1	3	1	2	0	5	0	2	0	3	0	1	0	0	0	0	0	1	0	0	0	3	0	0	2
X1273	Dinophyceae	NA	NA	NA	NA	0	0	0	0	0	0	0	0	0	1	1	1	0	1	1	3	2	0	0	0	0	0	1	3	2	1	3	2	1	1	1	0	0	4	2	0	0	0	1	0	5	1	7	0
X1321	Dinophyceae	NA	NA	NA	NA	0	0	0	0	0	0	0	0	0	0	0	0	0	0	0	0	0	0	0	0	0	0	0	0	0	0	0	0	0	0	0	0	0	0	0	0	0	0	0	0	0	0	0	0
X1426	Dinophyceae	NA	NA	NA	NA	0	0	0	0	0	0	0	0	0	0	0	0	0	0	0	0	0	0	0	0	0	0	2	0	0	0	0	0	0	0	0	11	1	0	0	0	0	0	0	0	0	0	0	0
X147	Dinophyceae	NA	NA	NA	NA	11	6	17	10	28	27	25	38	40	108	55	26	163	107	296	430	194	229	166	28	194	480	129	65	62	81	87	38	25	44	29	33	0	22	11	14	10	9	17	8	5	17	19	7
X1523	Dinophyceae	NA	NA	NA	NA	0	0	0	0	0	0	0	1	0	0	0	0	0	0	0	0	0	0	0	0	0	0	0	0	0	0	0	0	0	0	0	0	0	0	0	0	0	0	2	1	1	0	1	0
X157	Dinophyceae	NA	NA	NA	NA	0	0	13	0	0	1	0	7	7	14	6	5	19	21	34	38	64	21	11	2	8	28	26	87	119	81	314	432	401	279	383	501	83	500	330	188	91	56	82	59	101	123	76	36
X1670	Dinophyceae	NA	NA	NA	NA	0	0	0	0	0	0	0	0	0	0	0	0	0	0	0	0	0	0	0	0	0	0	0	0	0	0	0	0	0	0	0	0	0	0	0	0	0	0	0	0	0	0	0	0
X168	Dinophyceae	NA	NA	NA	NA	30	1	0	44	18	0	6	38	12	101	2	26	43	17	89	50	43	0	1	0	13	27	1	32	33	8	16	4	29	44	44	70	0	18	13	18	26	7	89	244	94	330	288	112
X1686	Dinophyceae	NA	NA	NA	NA	0	0	0	0	0	0	0	1	0	0	0	0	0	0	0	0	0	0	0	0	0	0	0	0	0	0	0	0	0	0	0	0	0	0	0	0	0	0	0	0	0	0	0	0
X1727	Dinophyceae	NA	NA	NA	NA	0	0	0	0	0	0	0	0	0	0	0	0	0	0	1	1	0	0	0	0	0	0	0	0	0	0	0	0	0	0	0	0	0	0	0	0	0	0	0	0	0	0	0	0
X1748	Dinophyceae	NA	NA	NA	NA	0	0	0	0	0	0	0	0	0	0	0	0	0	0	0	0	0	0	0	0	0	0	0	0	0	0	0	0	0	0	0	0	2	0	0	0	0	0	0	0	0	0	0	0
X1765	Dinophyceae	NA	NA	NA	NA	6	6	5	8	6	2	10	5	0	4	1	0	0	0	0	1	0	0	0	0	1	0	0	0	0	0	0	0	0	0	0	0	0	0	0	0	0	0	0	0	0	0	0	0
X1877	Dinophyceae	NA	NA	NA	NA	0	0	0	0	0	0	0	0	0	0	0	0	0	0	0	0	0	0	0	0	0	0	0	0	0	0	0	0	2	0	0	0	0	0	0	2	0	0	0	4	0	0	0	0
X1918	Dinophyceae	NA	NA	NA	NA	0	0	0	0	0	0	0	0	0	1	0	0	0	0	0	0	0	0	0	0	0	0	0	0	1	1	0	0	1	1	0	0	0	0	0	0	2	0	1	0	0	3	1	0
X194	Dinophyceae	NA	NA	NA	NA	0	0	0	0	0	0	0	0	0	0	0	0	0	0	0	0	0	0	1	0	0	0	0	0	0	0	1	0	0	0	0	0	1	2	0	0	3	1	0	2	5	0	2	1
X1996	Dinophyceae	NA	NA	NA	NA	0	0	2	0	0	0	0	1	0	0	0	0	0	0	0	0	0	0	1	0	0	0	0	0	0	0	0	0	0	0	0	0	0	3	0	1	0	0	0	0	0	0	0	0
X2018	Dinophyceae	NA	NA	NA	NA	7	3	0	0	11	0	0	4	0	0	0	0	0	0	0	0	0	0	1	0	0	0	0	0	0	0	0	0	0	0	0	0	0	0	0	0	0	0	0	0	0	0	0	0
X202	Dinophyceae	NA	NA	NA	NA	0	0	0	0	1	10	4	28	27	23	30	11	45	39	56	201	75	85	23	9	19	57	18	62	50	35	13	42	6	49	39	40	1	58	28	28	11	10	4	5	39	36	61	26
X2032	Dinophyceae	NA	NA	NA	NA	0	0	0	0	0	0	0	0	0	0	0	0	0	0	1	0	0	0	0	0	0	0	0	0	0	0	0	0	0	0	0	0	0	0	0	0	0	0	0	0	0	0	0	0
X2119	Dinophyceae	NA	NA	NA	NA	0	0	0	0	0	0	0	0	0	0	0	0	0	0	0	0	0	0	0	0	0	0	0	0	0	0	0	0	0	0	0	0	1	0	0	0	0	0	0	0	0	2	0	0
X2133	Dinophyceae	NA	NA	NA	NA	0	0	0	0	0	0	0	0	0	0	0	0	0	0	0	0	0	0	0	0	0	0	0	0	0	0	0	0	0	0	0	0	0	0	0	0	0	0	0	0	0	0	0	0
X218	Dinophyceae	NA	NA	NA	NA	1	2	0	2	0	1	0	0	0	0	0	2	0	1	0	7	0	33	0	9	3	0	0	0	14	0	1	3	1	3	0	1	31	0	0	12	15	1	0	15	3	12	12	9
X2212	Dinophyceae	NA	NA	NA	NA	0	0	0	0	0	0	0	0	0	0	0	0	0	0	0	0	0	0	0	0	0	0	0	0	0	0	0	0	0	0	0	0	0	0	0	0	0	0	0	0	0	0	0	0
X2264	Dinophyceae	NA	NA	NA	NA	0	0	0	0	0	0	0	0	1	0	0	0	0	0	0	0	0	0	0	0	0	0	0	0	0	0	0	0	0	0	0	0	0	0	0	0	0	0	0	0	0	0	0	0
X2275	Dinophyceae	NA	NA	NA	NA	0	0	0	0	0	0	0	0	0	0	0	0	0	0	0	0	0	0	0	0	0	1	0	0	0	0	0	0	1	0	0	0	0	0	0	0	0	0	0	0	0	0	0	0
X2293	Dinophyceae	NA	NA	NA	NA	0	1	4	0	0	1	2	1	1	1	0	0	0	0	3	0	2	3	4	0	0	1	0	3	0	3	3	0	2	4	0	0	0	3	1	1	1	0	0	0	1	0	0	0
X2358	Dinophyceae	NA	NA	NA	NA	0	0	0	0	0	0	0	0	0	0	0	0	0	0	0	0	0	0	0	0	0	0	0	0	0	0	0	0	0	0	0	0	0	0	0	0	0	0	0	0	0	0	0	0
X2381	Dinophyceae	NA	NA	NA	NA	0	0	0	0	0	0	18	0	0	0	0	0	0	0	0	0	0	0	0	0	0	0	0	0	0	0	0	0	0	0	0	0	0	0	0	0	0	0	0	0	0	0	0	0
X2509	Dinophyceae	NA	NA	NA	NA	0	0	0	0	0	0	0	0	0	0	0	0	0	0	0	0	0	0	0	0	0	0	0	0	0	0	0	0	0	0	0	0	0	0	0	0	0	0	0	0	0	0	0	0
X2511	Dinophyceae	NA	NA	NA	NA	0	0	0	0	0	0	0	0	0	0	0	0	0	0	0	0	0	1	0	0	0	0	0	0	0	0	0	0	0	0	0	0	0	0	0	0	0	0	1	4	1	0	2	0
X2521	Dinophyceae	NA	NA	NA	NA	0	0	0	0	0	0	0	0	0	0	0	0	0	0	0	0	0	0	0	0	0	0	0	0	0	0	0	0	0	0	0	0	0	0	0	0	0	0	0	0	0	0	0	0
X2565	Dinophyceae	NA	NA	NA	NA	0	0	0	0	0	0	0	0	0	0	0	0	0	0	0	0	0	0	0	0	0	0	0	0	0	0	0	0	0	0	0	0	0	0	0	0	0	0	0	0	0	0	0	0
X2571	Dinophyceae	NA	NA	NA	NA	0	0	0	1	0	0	0	0	0	0	0	0	1	0	0	1	0	0	0	0	0	0	0	0	1	0	0	0	0	0	0	0	0	0	0	0	0	0	2	0	1	4	5	0
X2573	Dinophyceae	NA	NA	NA	NA	0	0	0	0	0	0	0	0	0	0	0	0	0	0	0	0	0	0	0	0	0	0	0	0	0	0	0	0	0	0	0	0	0	0	0	0	0	0	0	0	0	0	0	0
X2599	Dinophyceae	NA	NA	NA	NA	0	0	0	0	0	0	0	0	0	0	0	0	0	0	0	0	0	0	0	0	0	0	0	0	0	0	0	0	0	0	0	0	0	0	0	0	0	0	0	0	0	0	0	0
X2654	Dinophyceae	NA	NA	NA	NA	0	0	0	0	0	0	0	0	0	0	0	0	0	0	0	0	0	0	0	0	0	0	0	0	0	0	0	0	0	0	0	0	0	0	0	0	0	0	0	0	0	0	0	0
X270	Dinophyceae	NA	NA	NA	NA	0	0	0	0	0	0	0	0	0	0	0	0	0	0	0	0	0	0	0	0	0	2	0	10	44	0	106	44	33	47	0	21	0	172	45	2	101	59	20	168	101	170	105	67
X2704	Dinophyceae	NA	NA	NA	NA	0	0	1	0	0	0	0	0	0	0	0	0	0	0	0	2	3	2	1	0	3	10	0	1	0	0	1	0	0	0	0	0	0	0	0	0	0	0	1	0	0	1	0	0
X2713	Dinophyceae	NA	NA	NA	NA	0	0	0	0	0	0	0	0	0	0	0	0	0	0	0	0	0	0	0	0	0	0	0	0	0	0	0	0	0	0	0	0	0	0	0	0	0	0	0	0	0	0	0	0
X2730	Dinophyceae	NA	NA	NA	NA	0	0	0	0	1	2	0	0	3	2	0	0	6	0	2	0	2	0	1	0	2	5	0	0	0	0	0	1	0	0	0	0	0	1	0	1	0	0	0	0	0	0	0	0
X2737	Dinophyceae	NA	NA	NA	NA	0	0	0	0	0	0	0	0	0	0	0	0	0	0	0	0	0	0	0	0	0	0	0	0	0	0	0	0	0	0	0	0	0	0	0	0	0	0	0	0	0	0	0	0
X2747	Dinophyceae	NA	NA	NA	NA	0	0	0	0	0	0	0	0	0	0	0	0	0	0	0	0	0	0	0	0	0	0	0	0	0	0	0	0	0	0	0	0	0	0	0	0	0	0	0	0	0	0	0	0
X2762	Dinophyceae	NA	NA	NA	NA	1	0	0	2	0	0	0	0	0	0	0	0	0	0	1	0	0	0	0	0	0	0	0	0	0	0	0	0	0	0	0	0	0	0	1	0	0	0	0	0	0	2	2	0
X2784	Dinophyceae	NA	NA	NA	NA	0	0	0	0	0	0	0	0	0	0	0	0	0	0	0	0	0	0	0	0	0	0	0	0	0	0	0	0	0	0	0	0	0	0	0	0	0	0	0	0	0	1	0	0
X283	Dinophyceae	NA	NA	NA	NA	0	0	0	2	2	7	3	6	1	20	3	7	11	6	26	17	16	9	5	2	8	14	2	0	7	8	11	8	2	6	5	3	0	14	2	9	0	3	1	2	0	1	0	0
X2900	Dinophyceae	NA	NA	NA	NA	0	0	0	0	1	0	0	0	2	0	0	0	0	0	1	1	0	0	1	0	0	1	0	0	0	0	0	0	0	0	0	0	0	0	0	0	0	0	1	2	1	1	0	0
X301	Dinophyceae	NA	NA	NA	NA	5	0	0	3	26	0	0	0	0	0	1	0	0	0	0	0	0	0	0	0	0	0	0	0	0	0	0	0	16	1	3	0	1	15	15	10	21	15	11	69	0	1	8	3
X3038	Dinophyceae	NA	NA	NA	NA	0	0	0	0	0	0	0	0	0	0	0	0	0	0	0	0	0	0	0	0	0	0	0	0	0	0	0	0	0	0	0	0	0	0	0	0	0	0	0	0	0	0	0	0
X3062	Dinophyceae	NA	NA	NA	NA	0	0	0	1	0	0	2	0	0	0	0	0	0	0	0	0	0	0	0	0	0	0	0	2	0	0	0	0	0	0	0	0	0	0	0	4	0	0	2	2	0	0	0	1
X3089	Dinophyceae	NA	NA	NA	NA	0	0	0	0	1	0	0	0	0	0	1	0	0	0	0	0	1	1	0	0	0	0	1	0	0	0	0	0	0	1	0	0	0	2	0	0	0	0	2	0	0	1	0	0
X3107	Dinophyceae	NA	NA	NA	NA	0	0	0	0	0	0	0	0	0	0	0	0	0	0	0	0	0	0	0	0	0	0	0	0	0	0	0	0	0	0	0	0	0	0	0	0	0	0	0	0	0	0	0	0
X3119	Dinophyceae	NA	NA	NA	NA	0	0	0	0	0	0	0	0	0	0	0	0	0	0	0	0	0	0	0	0	0	0	0	0	0	0	0	0	0	0	0	0	0	0	0	0	0	0	0	0	0	0	0	0
X313	Dinophyceae	NA	NA	NA	NA	0	0	0	0	0	0	1	1	1	1	0	0	0	2	1	1	1	0	0	0	0	0	1	0	0	0	1	0	0	0	0	0	0	0	1	0	0	0	2	3	2	3	2	0
X3178	Dinophyceae	NA	NA	NA	NA	0	0	0	0	0	0	0	0	1	0	0	0	0	0	0	0	1	0	0	0	0	0	0	0	0	0	0	0	0	0	0	0	0	0	0	0	0	0	0	0	0	0	0	0
X3280	Dinophyceae	NA	NA	NA	NA	0	0	0	0	0	0	1	0	0	0	0	0	0	1	0	0	0	0	0	0	0	0	0	0	0	0	0	1	0	0	0	0	0	0	0	0	0	0	0	0	0	0	0	0
X3281	Dinophyceae	NA	NA	NA	NA	0	0	0	0	0	0	0	4	0	0	1	0	0	0	0	0	0	2	0	0	0	0	0	0	0	0	0	0	0	1	0	0	0	0	0	0	0	0	0	0	0	1	0	0
X3356	Dinophyceae	NA	NA	NA	NA	0	0	0	0	0	0	0	0	0	0	0	0	0	0	0	0	0	0	0	0	0	0	0	0	0	0	0	0	0	0	0	0	0	0	0	0	0	0	0	0	0	1	0	0
X3365	Dinophyceae	NA	NA	NA	NA	0	0	0	0	0	0	0	0	0	0	0	0	0	0	0	0	0	0	0	0	0	0	0	0	0	0	0	0	0	0	0	0	0	0	0	0	0	0	0	0	0	0	0	0
X3375	Dinophyceae	NA	NA	NA	NA	0	0	0	0	0	0	0	0	1	0	2	0	0	0	0	1	2	0	0	0	0	0	0	0	0	0	0	0	0	0	0	1	1	1	0	0	0	0	0	1	0	0	0	0
X3420	Dinophyceae	NA	NA	NA	NA	0	0	0	0	0	0	0	0	0	0	0	0	0	0	0	0	0	0	0	0	0	0	0	0	0	0	0	0	0	0	0	0	0	0	0	0	0	0	0	0	0	0	0	0
X3437	Dinophyceae	NA	NA	NA	NA	0	2	0	0	0	0	0	0	0	4	0	0	0	2	0	0	0	1	0	0	0	0	0	0	0	0	1	3	0	0	0	0	0	2	0	1	0	0	0	0	0	0	0	0
X3469	Dinophyceae	NA	NA	NA	NA	0	0	0	0	0	0	0	0	0	0	0	0	0	0	0	0	0	0	0	0	0	0	0	0	0	0	0	0	0	0	0	0	0	0	0	0	0	0	0	0	1	2	1	0
X3473	Dinophyceae	NA	NA	NA	NA	0	0	0	0	0	0	0	0	0	0	0	0	0	0	0	0	0	0	0	0	0	0	0	0	0	0	0	0	0	0	0	0	0	0	0	0	0	0	0	0	0	0	0	0
X3489	Dinophyceae	NA	NA	NA	NA	0	0	0	0	1	0	0	0	1	1	0	0	0	1	0	0	0	0	1	0	0	0	0	1	0	0	0	0	0	0	0	3	0	0	0	0	0	0	0	0	0	0	0	0
X35	Dinophyceae	NA	NA	NA	NA	36	66	53	142	83	82	74	90	85	185	77	37	117	86	267	263	204	267	110	43	135	310	134	69	183	251	587	303	635	370	298	241	10	1367	676	676	493	411	653	592	318	808	750	287
X3506	Dinophyceae	NA	NA	NA	NA	0	0	0	2	0	0	0	0	0	2	0	0	0	0	0	0	0	2	0	0	0	0	0	0	0	0	0	0	0	0	0	0	0	0	0	1	0	0	1	3	0	0	0	0
X3535	Dinophyceae	NA	NA	NA	NA	0	0	0	0	0	0	0	0	0	0	0	0	0	0	0	0	0	0	0	0	0	0	0	0	0	0	0	0	0	0	0	0	0	0	0	0	0	0	0	0	0	0	0	0
X3571	Dinophyceae	NA	NA	NA	NA	0	0	0	0	0	0	0	0	0	0	0	0	0	0	0	0	0	0	0	0	0	0	0	0	0	0	0	0	2	0	0	2	0	1	0	0	2	0	1	1	0	2	0	0
X3574	Dinophyceae	NA	NA	NA	NA	0	0	0	0	0	0	0	0	0	0	0	0	0	0	0	0	0	0	0	0	0	0	0	0	0	0	0	0	0	0	0	0	0	0	0	1	0	0	0	0	0	0	0	0
X3575	Dinophyceae	NA	NA	NA	NA	0	0	0	0	0	0	0	0	0	0	0	0	0	0	0	0	0	0	0	0	0	0	0	0	0	0	0	0	0	0	0	0	0	0	0	0	0	0	0	0	0	0	0	0
X3579	Dinophyceae	NA	NA	NA	NA	0	0	0	0	0	0	0	0	0	0	0	0	0	0	0	0	0	0	0	0	0	0	0	0	0	0	0	0	0	0	0	0	0	0	0	0	0	0	0	0	0	0	0	0
X3583	Dinophyceae	NA	NA	NA	NA	0	0	0	0	0	0	0	0	0	0	0	0	0	0	0	0	0	0	0	0	0	0	0	0	0	0	0	0	0	0	0	0	0	0	0	0	0	0	0	0	0	0	0	0
X359	Dinophyceae	NA	NA	NA	NA	0	0	0	0	0	0	0	0	0	0	0	0	0	0	0	0	0	0	0	1	0	0	0	0	0	1	7	0	0	0	0	0	9	0	1	0	0	2	0	0	0	0	0	0
X361	Dinophyceae	NA	NA	NA	NA	35	22	36	52	66	56	35	31	41	133	35	19	85	74	72	70	31	24	27	3	8	43	25	14	34	30	47	86	28	62	29	13	0	28	17	10	5	12	4	31	22	14	6	5
X3638	Dinophyceae	NA	NA	NA	NA	0	0	0	0	0	0	0	0	0	0	0	0	0	0	0	0	0	0	0	0	0	0	0	0	0	0	0	0	0	0	0	0	0	0	0	0	0	0	0	0	0	0	0	0
X3661	Dinophyceae	NA	NA	NA	NA	0	0	0	0	0	0	1	0	0	2	0	0	0	0	0	0	0	0	0	0	0	0	0	0	0	0	0	0	0	0	0	6	0	0	0	0	0	0	0	0	0	0	0	0
X3766	Dinophyceae	NA	NA	NA	NA	0	0	0	0	0	0	0	0	6	0	0	0	0	0	0	0	1	0	0	0	0	0	0	0	0	0	0	0	0	0	0	0	0	0	1	0	0	0	0	0	0	0	0	0
X3782	Dinophyceae	NA	NA	NA	NA	0	0	0	0	0	0	2	0	0	1	0	0	0	0	0	2	0	1	1	0	1	0	0	0	0	0	1	0	0	1	0	0	0	0	1	0	0	0	1	0	0	0	0	0
X3791	Dinophyceae	NA	NA	NA	NA	0	0	0	0	0	0	1	0	0	0	0	0	0	1	0	0	1	0	0	0	0	0	0	0	0	0	0	0	0	0	0	0	0	0	0	2	0	0	0	1	0	0	0	0
X38	Dinophyceae	NA	NA	NA	NA	73	121	211	303	216	154	369	258	204	492	112	70	158	150	174	252	249	254	158	27	100	234	148	125	156	249	526	286	244	201	317	427	7	493	304	217	665	505	1063	1718	1736	2201	1233	502
X3889	Dinophyceae	NA	NA	NA	NA	0	0	0	0	0	0	0	0	0	0	0	0	0	0	0	0	0	0	0	0	0	0	0	0	0	0	0	0	0	0	0	0	0	0	0	0	0	0	0	0	0	0	0	0
X3933	Dinophyceae	NA	NA	NA	NA	0	0	0	0	0	0	0	0	0	0	0	0	0	0	1	0	0	0	0	0	0	0	0	0	0	0	0	4	0	0	0	0	0	0	0	0	0	1	0	1	0	1	0	0
X3990	Dinophyceae	NA	NA	NA	NA	0	0	0	0	0	0	0	0	0	0	0	0	0	0	0	0	0	0	0	0	0	1	0	0	0	0	0	0	0	0	0	0	0	0	0	0	0	0	0	0	0	1	0	0
X3994	Dinophyceae	NA	NA	NA	NA	0	0	0	0	0	0	0	0	0	0	0	0	0	0	0	0	0	0	0	0	0	0	0	1	0	0	0	0	0	0	0	0	0	0	0	0	0	0	1	4	0	1	0	0
X4028	Dinophyceae	NA	NA	NA	NA	0	1	0	0	0	0	0	0	0	0	0	0	0	0	0	1	0	0	0	0	0	0	0	0	2	0	0	0	0	0	0	0	0	0	0	0	0	0	0	0	0	0	0	0
X4115	Dinophyceae	NA	NA	NA	NA	0	0	0	0	0	0	1	0	0	0	0	0	0	3	0	0	0	0	0	0	0	0	0	0	0	0	0	0	0	0	0	0	0	2	0	0	0	0	0	0	0	0	0	1
X4264	Dinophyceae	NA	NA	NA	NA	0	0	0	1	0	0	0	0	0	0	0	0	0	0	0	0	0	0	0	0	0	0	0	0	0	0	0	0	0	0	0	1	0	1	0	0	0	0	0	0	0	0	0	0
X4286	Dinophyceae	NA	NA	NA	NA	0	0	0	0	0	0	0	0	0	0	0	0	0	0	0	0	0	0	0	0	0	0	0	0	0	0	0	0	0	0	0	0	0	0	0	0	0	0	0	0	0	0	0	0
X4336	Dinophyceae	NA	NA	NA	NA	0	0	0	0	0	0	0	0	0	0	0	0	0	0	0	0	0	0	0	0	0	0	0	1	0	0	0	3	0	0	0	0	0	0	0	0	0	0	0	0	0	0	0	0
X4344	Dinophyceae	NA	NA	NA	NA	0	0	0	0	0	0	0	0	0	0	0	0	0	0	0	0	0	0	0	0	0	0	0	0	0	0	0	0	0	0	0	0	0	0	0	0	0	0	0	2	0	0	0	0
X4355	Dinophyceae	NA	NA	NA	NA	0	0	0	0	0	0	0	0	0	0	0	0	0	0	0	0	0	0	0	0	0	0	0	0	0	0	0	0	0	0	0	0	0	0	0	0	0	0	0	0	0	0	0	0
X4390	Dinophyceae	NA	NA	NA	NA	0	0	0	0	0	0	0	0	0	0	0	0	0	0	0	0	0	0	0	0	0	0	0	0	0	0	0	0	0	0	0	0	0	0	0	0	0	0	0	0	0	0	0	0
X4428	Dinophyceae	NA	NA	NA	NA	0	0	0	0	0	0	0	0	0	0	0	0	0	0	0	0	0	0	0	0	0	0	0	0	0	0	0	0	0	0	0	0	0	0	0	0	0	0	0	0	0	0	0	0
X4459	Dinophyceae	NA	NA	NA	NA	0	0	0	0	0	0	0	0	0	0	0	0	0	0	0	0	0	0	0	0	0	0	0	0	0	0	0	0	0	0	0	0	0	0	0	0	0	0	0	0	0	0	0	0
X514	Dinophyceae	NA	NA	NA	NA	0	0	0	0	0	0	6	5	27	102	3	2	77	41	161	180	86	55	10	4	31	46	28	8	9	0	0	0	0	1	0	0	0	0	0	0	0	0	0	0	0	0	0	0
X556	Dinophyceae	NA	NA	NA	NA	0	0	0	18	0	0	30	0	0	0	0	0	0	0	0	0	0	0	0	4	0	0	0	15	0	0	0	22	0	0	0	0	0	18	0	0	0	0	1	0	0	0	0	0
X659	Dinophyceae	NA	NA	NA	NA	0	0	0	0	0	0	0	0	0	0	0	0	0	0	0	0	0	1	0	5	0	0	1	0	1	9	1	0	0	0	1	2	0	0	0	3	0	0	0	0	0	1	0	1
X677	Dinophyceae	NA	NA	NA	NA	0	3	0	2	1	0	0	0	0	1	0	1	4	1	2	0	0	0	0	0	1	3	0	0	0	1	8	3	1	1	0	0	0	0	0	0	0	0	0	0	0	1	0	0
X693	Dinophyceae	NA	NA	NA	NA	0	1	0	0	0	0	0	0	0	0	0	0	0	0	0	0	0	0	0	1	0	0	0	0	0	0	0	0	0	0	0	0	0	0	0	0	0	0	0	0	0	0	0	0
X721	Dinophyceae	NA	NA	NA	NA	0	0	0	0	0	0	0	0	0	0	0	0	0	0	1	0	1	0	0	0	0	0	16	0	0	0	0	1	0	1	6	2	0	0	15	1	0	7	0	4	10	9	2	5
X78	Dinophyceae	NA	NA	NA	NA	0	0	0	0	0	0	0	0	0	0	0	0	0	0	0	3	1	1	2	1	3	1	0	1	3	1	1	17	16	8	3	3	0	13	11	29	77	96	171	270	470	442	312	110
X785	Dinophyceae	NA	NA	NA	NA	0	0	0	0	0	0	0	0	0	0	0	0	0	0	0	0	0	0	0	0	0	0	0	0	0	0	0	0	0	0	0	0	0	0	0	0	0	0	0	0	0	0	0	0
X818	Dinophyceae	NA	NA	NA	NA	0	0	0	22	27	15	15	10	9	16	1	2	14	11	17	11	2	6	13	1	8	5	3	0	0	7	8	17	2	23	2	13	0	10	2	0	0	0	1	0	0	0	0	0
X862	Dinophyceae	NA	NA	NA	NA	0	0	0	0	0	0	0	0	0	0	0	0	0	0	0	0	1	0	0	0	0	1	0	1	1	0	9	1	5	7	0	3	0	13	5	0	7	5	6	15	5	16	8	2
X899	Dinophyceae	NA	NA	NA	NA	0	0	0	0	2	3	0	5	2	3	0	2	0	0	4	15	8	3	0	1	2	7	2	4	2	3	0	0	5	6	0	4	0	3	1	5	1	0	0	0	1	2	3	3
X985	Dinophyceae	NA	NA	NA	NA	0	0	0	0	0	0	0	0	0	0	0	0	0	0	0	0	0	0	0	0	0	0	0	0	0	0	0	0	0	0	0	0	0	0	0	0	0	0	0	0	0	0	0	0
X1155	Dinophyceae	Peridiniales	NA	NA	NA	0	0	0	0	0	0	0	0	0	0	0	0	0	0	0	0	0	0	0	0	0	0	0	0	0	0	0	0	0	0	0	0	0	0	0	2	0	0	1	0	0	0	0	0
X117	Dinophyceae	Peridiniales	Thoracosphaeraceae	NA	NA	54	52	88	251	226	156	356	428	254	761	229	152	326	202	477	854	469	467	160	28	66	246	121	127	254	130	188	153	126	118	64	18	0	49	51	29	12	57	27	82	123	107	118	73
X1453	Dinophyceae	Peridiniales	NA	NA	NA	2	1	0	1	0	0	4	0	0	0	0	0	0	0	0	0	0	0	0	0	0	1	0	0	0	0	0	0	0	0	0	0	0	0	0	0	0	0	0	0	0	0	0	0
X1659	Dinophyceae	Peridiniales	NA	NA	NA	0	0	0	0	1	0	0	0	1	0	0	0	2	1	0	2	2	3	2	0	3	7	0	1	1	2	2	4	0	1	3	0	0	1	0	0	0	0	0	0	0	0	0	0
X1677	Dinophyceae	Peridiniales	NA	NA	NA	0	0	0	0	0	0	0	0	0	0	0	0	0	0	0	0	0	0	0	0	0	0	0	0	0	0	0	0	0	0	0	0	0	0	0	0	0	0	0	0	0	0	0	0
X2209	Dinophyceae	Peridiniales	NA	NA	NA	0	0	0	0	0	0	0	0	0	0	0	0	0	0	0	2	0	0	0	0	0	0	0	0	0	0	0	0	0	0	0	1	0	0	0	0	0	0	0	0	0	0	0	0
X2473	Dinophyceae	Peridiniales	NA	NA	NA	0	0	0	0	0	0	0	0	0	0	0	0	0	0	0	0	0	0	0	2	0	0	0	0	0	0	0	0	0	0	0	0	0	0	0	0	0	0	0	0	0	0	0	0
X2517	Dinophyceae	Peridiniales	Amphidiniopsidaceae	NA	NA	0	0	0	0	0	0	0	0	0	0	0	0	0	0	0	0	0	0	0	0	0	0	0	0	0	0	0	0	0	0	0	0	0	0	0	0	0	0	0	0	0	0	0	0
X252	Dinophyceae	Peridiniales	NA	NA	NA	1	1	0	2	1	43	4	0	0	9	0	0	0	0	2	4	1	2	0	0	0	1	0	0	3	0	1	0	0	1	0	0	0	0	0	1	0	0	0	0	0	0	0	0
X3076	Dinophyceae	Peridiniales	NA	NA	NA	0	0	0	0	0	0	0	0	0	0	0	0	0	0	0	0	0	0	0	0	0	0	0	0	0	0	0	0	0	0	0	0	0	0	0	0	0	1	0	0	0	0	0	0
X3127	Dinophyceae	Peridiniales	NA	NA	NA	0	0	4	1	0	0	0	0	1	1	0	1	1	1	2	1	2	1	0	0	0	1	0	1	0	1	0	0	0	0	0	0	0	0	0	0	0	0	0	0	0	1	0	0
X3335	Dinophyceae	Peridiniales	NA	NA	NA	0	0	0	0	0	0	0	0	0	0	0	0	0	0	0	0	0	0	0	0	0	0	0	0	0	0	0	0	0	0	0	0	0	0	0	0	0	0	0	0	0	0	0	0
X420	Dinophyceae	Peridiniales	Thoracosphaeraceae	NA	NA	0	0	0	0	0	0	0	0	0	0	0	0	0	0	0	0	0	0	0	0	0	0	0	0	0	0	0	0	0	0	0	0	0	0	0	0	0	0	0	0	0	0	0	0
X4302	Dinophyceae	Peridiniales	NA	NA	NA	0	0	0	0	0	0	0	0	0	0	0	0	0	0	0	0	0	0	0	0	0	0	0	0	0	0	0	0	0	0	0	0	0	0	0	0	0	0	0	0	0	0	0	0
X484	Dinophyceae	Peridiniales	NA	NA	NA	4	1	6	6	3	2	3	2	3	16	8	5	14	12	33	51	15	22	22	2	21	69	12	6	11	9	9	4	4	9	3	6	0	3	2	0	1	2	7	2	2	0	4	1
X516	Dinophyceae	Peridiniales	NA	NA	NA	3	5	4	2	2	0	3	2	2	8	3	1	1	2	6	4	3	4	1	0	0	2	1	2	4	6	7	10	2	5	0	5	2	16	2	3	1	2	1	3	8	6	10	0
X625	Dinophyceae	Peridiniales	NA	NA	NA	0	0	0	0	0	0	0	0	0	0	0	0	0	0	0	0	1	0	0	0	0	0	0	0	0	0	0	0	0	0	0	0	0	0	0	0	0	0	0	0	0	0	0	2
X725	Dinophyceae	Peridiniales	NA	NA	NA	0	0	0	0	0	0	0	0	1	0	0	0	0	0	1	2	0	0	1	7	0	1	1	0	0	0	2	0	2	0	1	3	7	3	1	1	0	0	0	0	3	2	0	1
X878	Dinophyceae	Peridiniales	NA	NA	NA	0	0	0	0	0	0	0	0	1	3	1	0	6	1	9	17	2	3	5	2	9	22	9	5	1	6	2	2	0	1	0	0	0	3	0	1	0	1	0	1	0	0	0	0
X1115	Dinophyceae	Suessiales	Symbiodiniaceae	NA	NA	0	0	0	0	0	0	0	0	1	0	0	0	2	0	0	1	0	1	0	0	2	0	0	0	0	0	0	0	0	0	0	0	0	0	0	0	0	0	5	0	0	2	0	0
X1259	Dinophyceae	Suessiales	NA	NA	NA	0	0	0	0	0	0	0	0	0	0	0	0	0	0	0	0	0	0	0	0	0	0	0	0	0	0	0	0	0	0	0	0	0	0	0	0	0	0	0	0	0	0	0	0
X1564	Dinophyceae	Suessiales	NA	NA	NA	0	0	9	2	0	5	0	1	0	8	1	0	0	0	0	2	0	8	0	0	0	0	0	5	2	1	6	7	0	0	1	1	0	0	0	3	1	0	0	15	1	6	0	0
X2077	Dinophyceae	Suessiales	NA	NA	NA	0	0	0	0	0	0	0	0	0	0	0	0	0	0	0	0	0	0	0	0	0	0	0	0	0	0	0	0	0	0	0	0	0	0	0	0	0	0	0	0	0	0	0	0
X2351	Dinophyceae	Suessiales	NA	NA	NA	0	0	0	0	0	0	0	0	0	0	0	0	0	0	0	0	0	0	0	0	0	0	0	0	0	0	0	0	0	0	0	0	0	0	0	0	0	0	0	0	0	0	0	0
X2415	Dinophyceae	Suessiales	NA	NA	NA	0	0	0	0	0	0	0	0	0	0	0	0	0	0	0	0	0	0	0	0	0	0	0	0	0	0	0	0	0	0	0	0	0	0	0	0	0	0	0	0	0	0	0	0
X2731	Dinophyceae	Suessiales	NA	NA	NA	0	0	0	0	0	0	0	0	22	0	0	0	0	0	0	0	0	0	0	0	0	0	0	0	0	0	0	0	0	0	0	0	0	0	0	0	0	0	0	0	0	0	0	0
X284	Dinophyceae	Suessiales	NA	NA	NA	67	67	82	119	43	42	23	43	49	205	41	4	44	51	45	41	21	16	49	9	51	33	41	0	13	26	45	30	46	50	23	28	1	87	20	24	2	9	13	25	3	3	9	0
X4337	Dinophyceae	Suessiales	Suessiaceae	NA	NA	0	0	0	0	0	0	0	0	0	0	0	0	0	0	0	0	0	0	0	0	0	0	0	0	0	0	0	0	1	0	0	0	0	0	0	0	0	0	0	1	0	0	0	0
X458	Dinophyceae	Suessiales	NA	NA	NA	5	6	2	32	0	4	11	8	15	13	10	2	0	0	2	1	0	0	1	0	0	0	0	1	0	4	10	0	5	1	5	2	0	13	1	4	5	2	6	1	0	3	3	0
X572	Dinophyceae	Suessiales	Suessiaceae	NA	NA	5	6	14	23	17	6	16	10	11	38	13	2	8	14	19	11	1	4	1	2	3	12	0	0	3	3	5	0	1	1	0	1	2	5	1	0	2	0	0	0	0	2	0	3
X994	Dinophyceae	Suessiales	Symbiodiniaceae	NA	NA	0	0	0	0	0	0	1	0	0	0	0	0	0	0	0	0	0	0	4	0	0	0	0	0	1	0	0	0	1	0	0	0	0	0	2	0	0	0	0	0	0	2	0	0
X1637	Dinophyceae	Suessiales	Suessiaceae	Pelagodinium	Pelagodinium_beii	0	0	0	0	0	0	0	0	0	1	0	0	0	0	0	0	0	0	1	1	0	0	0	0	0	0	0	0	1	0	0	0	1	0	0	0	0	0	0	2	0	1	0	0
X367	Dinophyceae	Suessiales	Suessiaceae	Pelagodinium	Pelagodinium_beii	0	0	1	2	2	1	0	5	0	2	0	0	0	0	0	0	2	3	4	0	0	7	0	1	2	0	2	0	6	2	1	0	1	2	0	0	5	0	3	18	5	7	2	1
X2590	Dinophyceae	Dinophysiales	Oxyphysiaceae	Phalachroma	NA	0	0	0	0	0	0	0	0	0	0	0	0	0	0	0	0	0	0	0	0	0	0	0	0	0	0	0	0	0	0	0	0	0	0	0	0	0	0	0	0	0	0	0	0
X422	Dinophyceae	Dinophysiales	Oxyphysiaceae	Phalachroma	Phalacroma_mitra	0	0	0	0	0	0	0	0	0	0	0	0	0	0	0	0	0	0	0	0	0	0	0	0	0	0	0	0	0	0	0	0	4	0	0	0	0	0	0	0	2	0	0	0
X330	Dinophyceae	Gymnodiniales	Gymnodiniaceae	Polykrikos	Polykrikos_kofoidii	0	0	0	0	0	0	0	0	4	8	0	0	3	1	1	42	40	31	9	16	0	6	1	26	5	17	2	17	0	50	2	11	5	51	4	3	1	0	0	2	3	0	0	30
X694	Dinophyceae	Gymnodiniales	Gymnodiniaceae	Polykrikos	Polykrikos_kofoidii	0	0	0	0	0	0	0	0	0	0	2	0	0	0	0	3	10	9	3	3	0	1	0	4	5	8	2	0	0	8	2	0	2	12	0	0	0	0	0	0	0	0	0	15
X392	Dinophyceae	Prorocentrales	Prorocentraceae	Prorocentrum	Prorocentrum_micans	2	1	1	2	1	3	3	3	0	11	1	3	18	9	17	29	6	18	16	6	18	17	6	9	2	8	6	3	2	4	1	3	13	4	4	1	2	1	1	2	0	2	2	1
X2597	Dinophyceae	Gonyaulacales	Protoceratiaceae	Protoceratium	Protoceratium_reticulatum	0	0	0	0	0	0	0	0	0	0	0	0	0	0	0	0	0	0	0	0	0	0	0	0	0	0	0	0	0	0	0	0	0	0	0	0	0	0	0	0	0	0	0	0
X1025	Dinophyceae	Peridiniales	Protoperidiniaceae	Protoperidinium	Protoperidinium_punctulatum	0	0	0	0	0	0	0	0	0	0	0	0	0	0	0	0	0	0	0	0	0	0	0	0	0	0	0	0	0	0	0	0	5	0	0	0	0	0	0	0	0	0	0	0
X1056	Dinophyceae	Peridiniales	Protoperidiniaceae	Protoperidinium	Protoperidinium_punctulatum	0	0	0	0	0	0	0	0	0	0	0	0	0	0	0	0	0	0	0	1	0	0	0	0	0	0	0	0	0	0	0	1	13	0	0	0	0	0	0	0	0	0	0	0
X1069	Dinophyceae	Peridiniales	Protoperidiniaceae	Protoperidinium	Protoperidinium_excentricum	0	0	0	0	0	0	0	0	0	0	0	0	0	3	0	0	0	0	0	0	0	0	0	0	0	0	0	0	3	0	0	0	0	0	0	0	0	0	0	0	0	0	0	0
X1158	Dinophyceae	Peridiniales	Protoperidiniaceae	Protoperidinium	Protoperidinium_pellucidum	0	0	0	0	0	0	0	0	0	0	0	0	0	0	0	0	0	0	0	0	0	0	0	0	0	0	0	0	0	0	0	0	2	0	0	0	0	0	0	0	0	0	0	0
X1226	Dinophyceae	Peridiniales	Protoperidiniaceae	Protoperidinium	Protoperidinium_monovelum	0	0	0	0	0	0	0	0	0	0	0	0	0	0	0	0	0	0	0	0	0	0	0	0	0	0	0	0	0	0	0	0	0	0	0	0	0	0	0	0	0	0	0	0
X1264	Dinophyceae	Peridiniales	Protoperidiniaceae	Protoperidinium	Protoperidinium_pellucidum	0	0	0	0	0	0	0	0	0	0	0	0	0	0	0	0	0	0	0	0	0	0	0	0	0	0	0	0	0	0	0	0	1	0	0	0	0	0	0	0	0	0	0	0
X1539	Dinophyceae	Peridiniales	Protoperidiniaceae	Protoperidinium	Protoperidinium_punctulatum	0	0	0	0	0	0	0	0	0	0	0	0	0	0	0	0	0	0	0	0	0	0	0	0	0	0	0	0	0	1	0	0	3	0	0	0	0	0	0	0	0	0	0	0
X155	Dinophyceae	Peridiniales	Protoperidiniaceae	Protoperidinium	Protoperidinium_punctulatum	0	0	0	0	0	0	0	0	0	0	0	0	0	0	0	0	0	5	0	32	0	0	0	0	0	0	1	0	10	6	2	23	214	2	0	0	0	0	0	0	0	0	1	0
X1709	Dinophyceae	Peridiniales	Protoperidiniaceae	Protoperidinium	Protoperidinium_punctulatum	0	0	0	0	0	0	0	0	0	0	0	0	0	0	0	0	0	1	0	0	0	0	0	0	0	0	0	0	0	0	0	0	5	0	0	0	0	0	0	0	0	0	0	0
X1758	Dinophyceae	Peridiniales	Protoperidiniaceae	Protoperidinium	Protoperidinium_punctulatum	0	0	0	0	0	0	0	0	0	0	0	0	0	0	0	0	0	0	0	0	0	0	0	0	0	0	0	0	0	0	0	0	0	0	0	0	0	0	0	0	0	0	0	0
X178	Dinophyceae	Peridiniales	Protoperidiniaceae	Protoperidinium	NA	0	3	4	0	0	2	3	4	2	5	2	0	1	1	0	1	0	0	1	18	0	3	4	4	1	3	0	0	0	0	0	3	66	1	2	1	0	0	0	0	0	0	0	0
X1803	Dinophyceae	Peridiniales	Protoperidiniaceae	Protoperidinium	Protoperidinium_bipes	0	0	0	0	0	0	0	0	0	0	0	0	0	0	0	0	0	0	0	0	0	0	0	0	0	0	0	0	0	0	0	0	1	0	0	0	1	0	2	0	0	0	0	0
X1933	Dinophyceae	Peridiniales	Protoperidiniaceae	Protoperidinium	Protoperidinium_punctulatum	0	0	0	0	0	0	0	0	0	0	0	0	0	0	0	0	0	0	0	0	0	0	0	0	0	0	0	0	0	0	0	4	0	0	0	0	0	0	0	0	0	0	0	0
X1935	Dinophyceae	Peridiniales	Protoperidiniaceae	Protoperidinium	NA	0	0	0	0	0	0	0	0	0	0	0	0	0	0	0	0	0	0	0	0	0	0	0	0	0	0	0	0	0	0	0	0	0	0	0	0	0	0	0	0	0	0	0	0
X1949	Dinophyceae	Peridiniales	Protoperidiniaceae	Protoperidinium	Protoperidinium_conicum	0	0	0	0	0	0	0	0	0	0	0	0	0	0	0	0	0	0	0	0	0	0	0	0	0	0	0	0	0	0	0	0	0	0	0	0	0	0	0	0	0	1	0	0
X1967	Dinophyceae	Peridiniales	Protoperidiniaceae	Protoperidinium	Protoperidinium_depressum	0	0	0	0	0	0	0	0	0	0	0	0	0	0	0	0	0	0	0	0	0	0	0	0	0	0	0	0	0	0	0	0	0	0	0	0	0	0	0	0	0	0	0	0
X2060	Dinophyceae	Peridiniales	Protoperidiniaceae	Protoperidinium	NA	0	0	0	0	0	0	0	0	0	0	0	0	0	0	0	0	0	0	0	0	0	0	0	0	0	0	0	0	0	0	0	0	0	0	0	0	0	0	0	0	0	0	0	0
X2184	Dinophyceae	Peridiniales	Protoperidiniaceae	Protoperidinium	Protoperidinium_pellucidum	0	0	0	0	0	0	0	0	0	0	0	0	0	0	0	0	0	0	0	0	0	0	0	0	0	0	0	0	0	0	0	0	0	0	0	0	0	0	0	0	0	0	0	0
X2201	Dinophyceae	Peridiniales	Protoperidiniaceae	Protoperidinium	Protoperidinium_pellucidum	0	0	0	0	0	0	0	0	0	0	0	0	0	0	0	0	0	0	0	0	0	0	0	1	0	0	0	0	0	0	0	0	2	0	0	0	0	0	0	0	0	0	0	0
X2278	Dinophyceae	Peridiniales	Protoperidiniaceae	Protoperidinium	Protoperidinium_punctulatum	0	0	0	0	0	0	0	0	0	0	0	0	0	0	0	0	0	0	0	0	0	0	0	0	0	0	0	0	0	0	0	0	1	0	0	0	0	0	0	0	0	0	0	0
X2359	Dinophyceae	Peridiniales	Protoperidiniaceae	Protoperidinium	Protoperidinium_monovelum	0	0	0	0	0	0	0	0	0	0	0	0	0	0	0	0	0	0	0	0	0	0	0	0	0	0	0	0	0	0	0	0	0	0	0	0	0	0	0	0	0	0	0	0
X2562	Dinophyceae	Peridiniales	Protoperidiniaceae	Protoperidinium	Protoperidinium_bipes	0	0	0	0	0	0	0	0	0	0	0	0	0	0	0	0	0	0	0	0	0	0	0	0	0	0	0	0	0	0	0	0	0	0	0	0	0	0	0	0	0	0	0	0
X2790	Dinophyceae	Peridiniales	Protoperidiniaceae	Protoperidinium	Protoperidinium_pellucidum	0	0	0	0	0	0	0	0	0	0	0	0	0	0	0	0	0	0	0	0	0	0	0	0	0	0	0	0	0	0	0	0	0	0	0	0	0	0	0	0	0	0	0	0
X2796	Dinophyceae	Peridiniales	Protoperidiniaceae	Protoperidinium	Protoperidinium_abei	0	0	0	0	0	0	0	0	0	0	0	0	0	0	0	0	0	0	0	0	0	0	0	0	0	0	0	0	0	0	0	0	0	0	0	0	0	0	0	0	0	0	0	0
X3060	Dinophyceae	Peridiniales	Protoperidiniaceae	Protoperidinium	Protoperidinium_thulesense	0	0	0	0	0	0	0	0	0	0	0	0	0	0	0	0	0	0	0	0	0	0	0	0	0	0	0	0	0	0	0	0	0	0	0	0	0	0	0	0	0	0	0	0
X3069	Dinophyceae	Peridiniales	Protoperidiniaceae	Protoperidinium	NA	0	0	0	0	0	0	0	0	0	0	0	0	0	0	0	0	0	0	0	0	0	0	0	0	0	0	0	0	0	0	0	0	0	0	0	0	0	0	0	0	0	0	0	0
X308	Dinophyceae	Peridiniales	Protoperidiniaceae	Protoperidinium	Protoperidinium_punctulatum	0	0	0	13	0	0	0	0	0	0	0	0	0	0	0	0	0	0	0	3	0	0	0	0	1	0	0	1	5	0	1	0	0	0	0	0	0	0	0	0	0	0	0	0
X3109	Dinophyceae	Peridiniales	Protoperidiniaceae	Protoperidinium	Protoperidinium_pellucidum	0	0	0	0	0	0	0	0	0	0	0	0	0	0	0	0	0	0	0	0	0	0	0	0	0	0	0	0	0	0	0	0	1	0	0	0	0	0	0	0	0	0	0	0
X327	Dinophyceae	Peridiniales	Protoperidiniaceae	Protoperidinium	Protoperidinium_conicum	0	0	0	0	0	0	0	0	0	0	0	0	0	0	0	0	0	0	0	0	0	0	0	0	0	0	0	0	0	0	0	0	0	0	0	0	0	0	0	0	0	15	0	0
X3282	Dinophyceae	Peridiniales	Protoperidiniaceae	Protoperidinium	NA	0	0	0	0	0	0	0	0	0	0	0	0	0	0	0	0	0	0	0	0	0	0	0	0	0	0	0	0	0	0	0	0	0	0	0	0	0	0	0	0	0	0	0	0
X3294	Dinophyceae	Peridiniales	Protoperidiniaceae	Protoperidinium	Protoperidinium_conicum	0	0	0	0	0	0	0	0	0	0	0	0	0	0	0	0	0	0	0	0	0	0	0	0	0	0	0	0	0	0	0	0	0	0	0	0	0	0	0	0	0	0	0	0
X3809	Dinophyceae	Peridiniales	Protoperidiniaceae	Protoperidinium	Protoperidinium_abei	0	0	0	0	0	0	0	0	0	0	0	0	0	0	0	0	0	0	0	0	0	0	0	0	0	0	0	0	0	0	0	0	0	0	0	0	0	0	0	0	0	0	0	0
X3892	Dinophyceae	Peridiniales	Protoperidiniaceae	Protoperidinium	Protoperidinium_bipes	0	0	0	0	0	0	0	0	0	0	0	0	0	0	0	0	0	0	0	0	0	0	0	0	0	0	0	0	0	0	0	0	0	0	0	0	0	0	0	0	0	0	0	0
X4243	Dinophyceae	Peridiniales	Protoperidiniaceae	Protoperidinium	NA	0	0	0	0	0	0	0	0	0	0	0	0	0	0	0	0	0	0	0	0	0	0	0	0	0	0	0	0	0	0	0	0	0	0	0	0	0	0	0	0	0	0	0	0
X4303	Dinophyceae	Peridiniales	Protoperidiniaceae	Protoperidinium	NA	0	0	0	0	0	0	0	0	0	0	0	0	0	0	0	0	0	0	0	0	0	0	0	0	0	0	0	0	0	0	0	0	0	0	0	0	0	0	0	0	0	0	0	0
X4357	Dinophyceae	Peridiniales	Protoperidiniaceae	Protoperidinium	Protoperidinium_depressum	0	0	0	0	0	0	0	0	0	0	0	0	0	0	0	0	0	0	0	0	0	0	0	0	0	0	0	0	0	0	0	0	0	0	0	0	0	0	0	0	0	0	0	0
X4380	Dinophyceae	Peridiniales	Protoperidiniaceae	Protoperidinium	Protoperidinium_pellucidum	0	0	0	0	0	0	0	0	0	0	0	0	0	0	0	0	0	0	0	0	0	0	0	0	0	0	0	0	1	0	0	0	0	0	0	0	0	0	1	0	0	0	0	0
X439	Dinophyceae	Peridiniales	Protoperidiniaceae	Protoperidinium	NA	0	0	0	1	0	0	0	1	0	0	4	0	1	0	0	0	0	1	0	2	0	0	2	0	0	0	0	0	1	0	0	1	6	1	1	3	0	0	2	5	0	2	0	1
X460	Dinophyceae	Peridiniales	Protoperidiniaceae	Protoperidinium	Protoperidinium_pellucidum	0	0	0	0	0	0	0	0	0	0	0	0	0	0	0	0	0	0	0	0	0	0	0	2	0	0	0	0	0	0	0	0	7	0	0	0	0	0	0	0	0	0	0	0
X58	Dinophyceae	Peridiniales	Protoperidiniaceae	Protoperidinium	Protoperidinium_pellucidum	0	0	1	1	0	0	0	0	0	0	0	0	3	0	0	0	0	0	0	16	0	0	26	3	3	1	0	3	2	1	7	55	418	1	10	7	4	12	0	0	3	5	12	4
X581	Dinophyceae	Peridiniales	Protoperidiniaceae	Protoperidinium	Protoperidinium_depressum	0	0	0	0	0	0	0	0	0	0	0	0	0	0	0	0	0	0	0	0	0	0	0	0	0	0	0	0	0	0	0	0	0	0	0	0	0	0	0	0	0	0	0	1
X588	Dinophyceae	Peridiniales	Protoperidiniaceae	Protoperidinium	Protoperidinium_monovelum	0	0	0	0	0	0	0	0	0	0	0	0	0	0	0	0	0	0	0	0	0	0	0	0	0	0	0	0	0	3	0	0	0	0	2	0	0	0	0	0	0	0	0	0
X601	Dinophyceae	Peridiniales	Protoperidiniaceae	Protoperidinium	Protoperidinium_conicum	0	0	0	0	0	0	0	0	0	0	0	0	0	0	0	0	0	0	0	0	2	0	0	0	0	0	0	0	0	0	0	4	0	0	0	0	0	0	0	0	0	1	0	0
X745	Dinophyceae	Peridiniales	Protoperidiniaceae	Protoperidinium	Protoperidinium_pellucidum	0	0	0	0	0	0	0	0	0	0	0	0	0	0	0	0	0	0	0	0	0	0	0	0	0	0	0	0	0	0	0	0	0	0	0	0	0	0	0	0	0	0	0	0
X850	Dinophyceae	Peridiniales	Protoperidiniaceae	Protoperidinium	Protoperidinium_punctulatum	0	0	0	0	0	0	0	0	0	0	0	0	0	0	0	0	0	0	0	5	0	0	0	0	0	0	0	0	0	0	0	0	10	0	0	0	0	0	0	0	0	0	0	0
X2406	Dinophyceae	Gonyaulacales	Pyrocystaceae	Pyrocystis	Pyrocystis_lunula	0	0	0	0	0	0	0	0	0	0	0	0	0	0	0	0	0	0	0	0	0	0	0	0	0	0	0	0	0	0	0	0	0	0	0	0	0	0	0	0	0	0	0	0
X140	Dinophyceae	Torodiniales	Torodiniaceae	Torodinium	Torodinium_robustum	62	87	96	226	295	162	211	234	111	420	138	78	176	126	290	416	131	175	50	12	19	55	33	60	77	37	35	87	17	31	29	32	0	77	17	30	13	13	16	88	63	60	42	14
X1102	Dinophyceae	Gonyaulacales	Ceratiaceae	Tripos	Tripos_furca	0	0	0	0	0	0	0	9	0	0	0	0	0	0	0	0	0	0	0	0	0	0	0	0	0	0	0	0	0	0	0	0	0	0	0	0	0	0	0	0	0	0	0	0
X158	Dinophyceae	Gonyaulacales	Ceratiaceae	Tripos	NA	0	0	0	0	0	0	0	1	1	64	4	0	0	10	34	6	11	2	13	74	4	45	30	21	15	23	14	3	4	24	32	36	31	4	0	0	2	0	0	8	24	65	24	47
X199	Dinophyceae	Gonyaulacales	Ceratiaceae	Tripos	Tripos_fusus	0	0	0	11	0	0	0	0	0	1	0	0	0	0	1	0	1	0	0	15	0	2	16	0	0	0	0	0	0	0	0	28	17	0	0	0	1	0	0	0	0	0	0	0
X3984	Discosea-Flabellinia	Vannellida	Vannellidae	Clydonella	Clydonella_sp.	0	0	0	0	0	0	0	0	0	0	1	0	0	0	1	0	0	0	0	0	0	0	0	0	0	0	0	0	0	0	0	0	0	0	0	0	0	0	0	1	0	0	0	0
X4039	Discosea-Flabellinia	Vannellida	Vannellidae	Lingulamoeba	Lingulamoeba_sp.	0	0	0	0	0	0	0	0	0	0	1	0	0	2	0	1	0	0	0	0	0	0	0	0	0	0	0	0	0	0	0	2	0	0	0	0	0	0	0	0	0	0	1	1
X3367	Discosea-Flabellinia	Vannellida	Vannellidae	Ripella	Ripella_sp.	0	0	0	0	0	0	0	0	0	0	0	0	0	0	0	0	0	0	0	0	0	0	0	0	0	0	0	0	0	0	0	0	0	0	0	0	0	0	0	0	0	0	0	0
X3536	Discosea-Flabellinia	Vannellida	Vannellidae	Ripella	Ripella_sp.	0	0	0	0	0	0	0	0	0	0	0	0	0	0	0	0	0	0	0	0	0	0	0	0	0	0	0	0	0	0	0	0	0	0	0	0	0	0	0	0	0	0	0	0
X3760	Discosea-Flabellinia	Vannellida	Vannellidae	Ripella	Ripella_sp.	0	0	0	0	0	0	0	0	0	0	0	0	0	0	0	0	0	0	0	0	0	0	0	0	0	0	0	0	0	0	0	0	0	0	0	0	0	0	0	0	0	0	0	0
X1702	Discosea-Flabellinia	Vannellida	Vannellidae	Vannella	Vannella_contorta	5	7	0	0	0	0	13	0	0	0	0	0	0	0	0	0	0	0	0	0	1	0	1	1	0	1	0	0	0	0	0	0	0	0	0	0	0	0	0	0	0	4	0	0
X2040	Discosea-Flabellinia	Vannellida	Vannellidae	Vannella	NA	2	1	0	1	0	0	2	0	0	0	0	0	0	3	0	0	1	0	0	0	0	1	0	0	0	0	1	0	0	0	0	0	0	0	0	0	0	0	1	0	0	5	0	1
X2349	Discosea-Flabellinia	Vannellida	Vannellidae	Vannella	NA	0	0	0	1	0	0	0	0	0	0	0	0	0	0	0	0	0	0	0	0	0	0	0	0	0	0	0	0	0	0	0	0	0	0	0	0	0	0	0	0	0	0	0	0
X2430	Discosea-Flabellinia	Vannellida	Vannellidae	Vannella	NA	0	1	0	0	0	0	1	0	0	0	0	0	0	0	0	0	0	0	0	0	1	0	1	1	0	0	0	4	2	1	1	0	0	0	0	0	0	0	0	2	0	4	0	0
X2544	Discosea-Flabellinia	Vannellida	Vannellidae	Vannella	NA	0	0	0	1	0	0	0	0	0	0	0	0	0	0	0	0	0	0	0	0	0	0	0	0	0	0	0	0	0	0	0	1	0	0	0	0	0	0	0	0	0	0	1	4
X2937	Discosea-Flabellinia	Vannellida	Vannellidae	Vannella	NA	2	0	0	0	0	0	1	0	0	0	0	0	0	0	0	0	1	0	0	0	0	0	0	0	0	0	0	1	0	0	0	0	0	1	0	0	0	0	0	0	0	0	1	0
X3824	Discosea-Flabellinia	Vannellida	Vannellidae	Vannella	NA	0	0	0	0	1	0	0	0	1	1	0	0	0	0	0	0	0	0	0	0	0	0	0	0	0	0	0	0	0	0	0	0	0	1	0	0	0	0	0	0	0	0	1	0
X1076	Echinodermata	Echinodermata_X	Echinodermata_XX	Asterias	Asterias_forbesi	0	0	2	0	0	0	0	0	0	0	0	0	0	0	0	0	0	0	0	0	0	1	0	0	0	0	0	2	0	1	0	0	0	1	0	0	0	0	0	0	0	0	0	0
X17	Echinodermata	Echinodermata_X	Echinodermata_XX	Asterias	Asterias_forbesi	60	36	297	230	72	203	15	119	339	310	49	61	248	616	14	132	237	144	245	359	88	1754	124	133	504	161	139	980	241	217	89	767	5	359	71	79	8	21	15	442	1400	96	162	55
X1813	Echinodermata	Echinodermata_X	Echinodermata_XX	Asterias	Asterias_forbesi	0	0	0	0	0	1	0	0	1	0	0	0	0	0	0	0	0	1	0	0	0	1	0	0	0	0	0	0	1	0	0	0	0	0	0	0	0	0	0	0	0	0	0	0
X1841	Echinodermata	Echinodermata_X	Echinodermata_XX	Asterias	Asterias_forbesi	0	0	0	0	0	0	0	0	0	0	0	0	0	0	0	0	0	0	0	0	0	0	0	0	0	0	0	0	0	0	0	0	0	0	0	0	0	0	0	0	0	0	0	0
X2387	Echinodermata	Echinodermata_X	Echinodermata_XX	Asterias	Asterias_forbesi	0	0	0	0	0	0	0	0	0	0	0	0	0	0	0	0	1	0	0	1	0	0	0	0	1	0	0	0	1	0	0	1	0	0	0	0	0	0	0	1	0	0	0	0
X2840	Echinodermata	Echinodermata_X	Echinodermata_XX	Asterias	Asterias_forbesi	0	0	0	0	0	0	0	1	0	0	0	0	2	0	0	0	0	1	0	0	0	0	0	0	0	0	0	1	0	0	0	0	0	0	0	0	0	0	0	0	0	0	0	0
X807	Echinodermata	Echinodermata_X	Echinodermata_XX	Astropecten	Astropecten_articulatus	0	0	0	0	0	0	0	0	0	0	0	0	0	0	0	0	0	0	0	0	0	0	0	0	0	0	0	0	0	0	0	0	0	0	0	0	0	0	0	0	57	1	7	0
X203	Echinodermata	Echinodermata_X	Echinodermata_XX	NA	NA	0	0	0	0	0	0	0	0	0	0	0	0	0	0	6	40	20	72	25	3	3	31	30	6	91	11	3	122	32	6	17	91	0	4	23	2	1	2	6	88	76	35	285	21
X4438	Echinodermata	Echinodermata_X	Echinodermata_XX	NA	NA	0	0	0	0	0	0	0	0	0	0	0	0	0	0	0	0	0	0	0	0	0	0	0	0	0	0	0	0	0	0	0	0	0	0	0	0	1	0	0	0	0	0	0	0
X4452	Echinodermata	Echinodermata_X	Echinodermata_XX	NA	NA	0	0	0	0	0	0	0	0	0	0	0	0	0	0	0	0	0	0	0	0	0	0	0	0	0	0	0	0	0	0	0	0	0	0	0	0	0	0	0	0	0	0	0	0
X1373	Echinodermata	Echinodermata_X	Echinodermata_XX	Paracentrotus	Paracentrotus_lividus	0	0	0	0	0	0	0	0	0	0	0	0	0	0	2	0	24	12	1	0	0	0	0	0	2	2	1	3	3	2	1	0	0	0	0	0	0	0	0	4	0	18	2	0
X2037	Echinodermata	Echinodermata_X	Echinodermata_XX	Paracentrotus	Paracentrotus_lividus	0	0	0	0	0	0	0	0	0	0	0	0	0	0	0	0	0	0	0	0	0	0	0	0	0	0	0	0	0	0	0	0	0	0	0	0	0	0	1	0	0	1	0	0
X24	Echinodermata	Echinodermata_X	Echinodermata_XX	Paracentrotus	Paracentrotus_lividus	0	0	3	3	4	0	0	1	75	6	27	3	12	125	684	1323	1288	1014	625	90	178	1288	216	272	1888	441	626	875	1302	973	789	1973	6	552	380	403	165	863	177	10992	15379	2173	5346	1281
X2651	Echinodermata	Echinodermata_X	Echinodermata_XX	Paracentrotus	Paracentrotus_lividus	0	0	0	0	0	0	0	0	0	0	0	0	0	0	0	2	1	2	1	0	0	0	0	0	0	0	0	2	0	0	1	0	0	0	1	0	0	0	0	1	2	10	0	0
X3244	Echinodermata	Echinodermata_X	Echinodermata_XX	Paracentrotus	Paracentrotus_lividus	0	0	0	0	0	0	0	0	0	0	0	0	0	0	0	0	0	0	0	0	0	0	0	0	0	0	0	0	1	0	0	0	0	0	0	0	0	0	0	0	0	0	2	0
X95	Echinodermata	Echinodermata_X	Echinodermata_XX	Paracentrotus	Paracentrotus_lividus	0	0	0	0	0	0	0	0	26	5	3	1	3	26	60	182	286	221	154	18	47	160	53	47	396	73	137	225	281	176	104	605	0	135	31	56	38	154	44	2167	2035	390	1724	282
X3419	Embryophyceae	Embryophyceae_X	Embryophyceae_XX	Apium	Apium_graveolens	0	0	0	0	0	0	0	0	0	0	0	0	0	0	0	0	0	0	0	0	0	0	0	0	0	0	0	0	0	0	0	0	0	0	0	0	0	0	0	0	0	0	0	0
X1957	Embryophyceae	Embryophyceae_X	Embryophyceae_XX	Brachypodium	Brachypodium_distachyon	0	0	0	0	0	0	0	0	0	1	0	0	0	0	0	0	0	0	0	0	0	0	0	0	0	0	0	2	0	0	0	0	0	0	0	0	0	0	0	1	0	0	0	0
X1881	Embryophyceae	Embryophyceae_X	Embryophyceae_XX	NA	NA	70	0	0	0	0	0	0	0	0	0	0	0	0	0	0	0	0	0	0	0	0	0	0	0	0	0	0	0	0	0	0	0	0	0	0	0	0	0	0	0	0	0	0	0
X1938	Embryophyceae	Embryophyceae_X	Embryophyceae_XX	NA	NA	0	0	0	0	0	0	0	0	0	0	0	0	0	0	0	0	0	0	0	0	0	0	0	0	0	0	0	0	0	0	0	0	0	0	0	0	0	0	0	0	0	0	0	0
X2320	Embryophyceae	Embryophyceae_X	Embryophyceae_XX	NA	NA	0	0	0	0	0	0	0	0	0	0	0	0	0	0	0	0	0	0	0	0	0	0	0	0	0	0	0	0	0	0	0	0	0	0	0	0	0	0	0	0	0	0	0	0
X2424	Embryophyceae	Embryophyceae_X	Embryophyceae_XX	NA	NA	1	0	0	0	0	0	0	0	0	0	0	0	0	0	0	0	0	0	0	0	0	0	0	0	0	0	0	0	0	0	0	0	0	0	0	0	0	0	0	0	0	0	0	0
X2885	Embryophyceae	Embryophyceae_X	Embryophyceae_XX	NA	NA	0	0	0	0	0	0	0	0	0	0	0	0	0	0	0	0	0	0	0	0	0	0	0	0	0	0	0	0	0	0	0	0	0	0	0	0	0	0	0	0	0	0	0	0
X440	Embryophyceae	Embryophyceae_X	Embryophyceae_XX	NA	NA	2	1	0	1	1	16	15	24	1	21	8	6	2	4	0	1	2	1	0	0	0	0	1	1	3	3	1	9	1	1	2	0	0	3	0	1	3	2	4	1	2	3	0	2
X853	Embryophyceae	Embryophyceae_X	Embryophyceae_XX	NA	NA	0	0	0	0	0	0	0	0	0	0	0	0	0	0	0	0	0	0	0	0	0	0	0	0	0	0	0	0	1	0	3	0	0	0	1	0	0	0	0	0	0	0	0	0
X1278	Embryophyceae	Embryophyceae_X	Embryophyceae_XX	Ostryopsis	Ostryopsis_davidiana	0	0	0	0	0	0	1	0	0	0	0	0	0	0	0	0	0	0	0	0	0	0	0	0	0	0	0	0	0	0	0	0	0	0	0	0	0	0	0	0	0	0	0	0
X2634	Embryophyceae	Embryophyceae_X	Embryophyceae_XX	Physcomitrella	Physcomitrella_patens	0	0	0	0	0	0	0	0	0	0	0	0	0	0	0	0	0	0	0	0	0	0	0	0	0	0	0	0	0	0	0	0	0	0	0	0	0	0	0	0	0	0	0	0
X3001	Embryophyceae	Embryophyceae_X	Embryophyceae_XX	Pinus	Pinus_luchuensis	0	0	0	0	0	0	0	0	0	0	0	0	0	0	0	0	0	0	0	0	0	0	0	1	0	0	0	0	0	0	0	0	0	0	0	0	0	0	0	0	0	0	0	0
X2183	Embryophyceae	Embryophyceae_X	Embryophyceae_XX	Pogostemon	Pogostemon_cablin	0	0	0	0	0	0	0	0	0	0	1	0	0	0	0	0	0	0	0	0	0	0	0	0	0	0	0	0	0	0	0	0	0	1	0	0	0	0	0	0	0	0	0	0
X1696	Embryophyceae	Embryophyceae_X	Embryophyceae_XX	Taxus	Taxus_wallichiana_var._wallichiana	0	0	0	0	0	0	0	0	0	0	0	0	0	0	0	0	0	0	0	0	0	0	0	0	0	0	0	0	0	0	0	0	0	0	0	0	0	0	0	0	0	0	0	0
X479	Embryophyceae	Embryophyceae_X	Embryophyceae_XX	Wollemia	Wollemia_nobilis	0	0	0	0	0	0	0	0	0	0	0	0	0	0	0	0	0	0	0	0	0	0	0	0	0	0	0	0	0	0	0	0	0	0	0	0	0	0	0	0	0	0	0	0
X1856	Endomyxa	NA	NA	NA	NA	4	2	10	0	0	1	4	3	5	0	0	0	0	0	0	1	0	0	1	0	1	0	0	0	0	0	6	0	0	0	0	0	0	0	0	0	0	0	0	0	0	0	0	0
X2543	Endomyxa	NA	NA	NA	NA	0	0	0	1	0	0	0	0	0	0	0	0	0	0	0	0	0	0	0	0	0	0	0	0	0	0	0	0	0	0	0	0	0	0	0	0	0	0	0	0	0	0	0	0
X3264	Endomyxa	NA	NA	NA	NA	0	0	0	0	2	0	0	0	0	0	0	0	0	0	0	1	0	0	0	0	0	0	0	0	0	0	0	0	0	0	0	0	0	0	0	0	0	0	0	0	0	0	0	0
X1764	Endomyxa	Vampyrellida	NA	NA	NA	8	4	4	7	2	4	1	1	1	2	1	0	1	1	0	0	0	0	0	1	0	0	0	0	0	0	0	0	0	0	0	0	1	0	0	0	0	0	0	0	0	0	0	0
X3269	Endomyxa	Vampyrellida	NA	NA	NA	0	0	0	0	0	0	0	0	0	0	0	0	0	0	0	0	0	0	0	0	0	0	0	0	0	0	0	0	0	0	0	0	0	0	0	0	0	0	0	0	0	0	0	0
X3289	Endomyxa	Vampyrellida	Vampyrellida_X	NA	NA	0	0	0	0	0	0	0	0	0	0	0	0	0	0	0	0	0	0	0	0	0	0	0	0	0	0	0	0	0	0	0	0	0	0	0	0	0	0	0	0	0	0	0	0
X3620	Endomyxa	Vampyrellida	NA	NA	NA	0	0	0	0	0	0	0	0	0	0	0	0	0	0	1	0	0	0	0	0	0	0	0	0	0	0	0	0	0	0	0	0	0	0	0	0	0	0	0	0	0	0	0	0
X3709	Endomyxa	Vampyrellida	NA	NA	NA	0	0	0	0	0	0	0	0	0	1	0	0	0	0	0	0	0	0	0	0	0	0	1	0	0	0	0	0	0	0	0	0	0	0	0	0	0	0	0	0	0	0	0	0
X3888	Endomyxa	Vampyrellida	Vampyrellida_X	NA	NA	0	0	0	0	0	0	0	0	0	0	0	0	0	0	0	0	0	0	0	0	0	0	0	0	0	0	0	0	0	0	0	0	0	0	0	0	0	0	0	0	0	0	0	0
X4070	Endomyxa	Vampyrellida	Vampyrellida_X	NA	NA	0	0	0	0	0	0	0	0	0	0	0	0	0	0	0	0	0	0	0	0	0	0	0	0	0	0	0	0	0	0	0	0	0	0	0	0	0	0	0	0	0	0	0	0
X726	Endomyxa	Vampyrellida	NA	NA	NA	4	8	0	0	0	0	354	0	0	0	0	0	0	0	0	0	0	0	0	0	0	0	1	0	0	0	0	0	0	0	0	0	0	0	0	0	0	0	1	0	0	0	0	0
X920	Endomyxa	Vampyrellida	Vampyrellida_X	NA	NA	0	1	0	0	0	0	0	1	0	1	0	0	0	0	0	0	0	0	0	0	0	0	0	0	0	0	0	0	0	0	0	0	0	0	0	0	0	0	0	0	0	0	0	0
X4053	Endomyxa	Vampyrellida	Penardia-lineage	Penardia-lineage_X	Penardia-lineage_X_sp.	0	0	0	0	0	0	0	1	0	0	0	0	0	0	0	0	0	0	0	0	0	0	0	0	0	0	0	0	0	0	0	0	0	0	0	0	0	0	0	0	0	0	0	0
X2939	Endomyxa	Vampyrellida	Sey055-lineage	Sey055-lineage_X	Sey055-lineage_X_sp.	0	0	1	0	2	1	3	1	0	1	0	0	0	0	0	1	0	0	0	0	0	0	0	0	0	0	0	0	1	0	1	0	0	1	0	0	1	0	0	0	0	0	0	0
X4180	Endomyxa	Vampyrellida	Sey055-lineage	Sey055-lineage_X	Sey055-lineage_X_sp.	0	1	0	0	0	0	1	0	0	0	0	0	0	0	0	0	0	0	0	0	0	0	0	0	0	0	0	0	0	0	0	0	0	0	0	0	0	0	0	0	0	0	0	0
X4250	Endomyxa	Vampyrellida	Sey055-lineage	Sey055-lineage_X	Sey055-lineage_X_sp.	0	1	0	1	1	0	0	0	0	0	0	0	0	0	0	0	0	0	0	0	0	0	0	0	0	0	0	0	0	0	0	0	0	0	0	0	0	0	0	0	0	0	0	0
X2549	Endomyxa	Vampyrellida	Vampyrellida_X	Vampyrellida_clade_B	Vampyrellida_sp.	0	0	0	0	0	0	0	0	0	0	0	0	0	0	0	0	0	0	0	0	0	0	0	0	0	0	0	0	0	0	0	0	0	0	0	0	0	0	0	0	0	0	0	0
X3606	Endomyxa	Vampyrellida	Vampyrellida_X	Vampyrellida_clade_B	Vampyrellida_sp.	0	0	0	0	0	0	0	0	0	0	0	0	0	0	0	0	0	0	0	0	0	0	0	0	0	0	1	2	0	0	0	0	0	0	0	1	0	0	0	0	2	0	0	1
X2315	Endomyxa	Vampyrellida	Vampyrellida_X	Vampyrellida_XX	Vampyrellida_XX_sp.	0	0	0	0	0	0	0	0	0	0	0	0	0	0	0	0	0	0	0	0	0	0	0	0	0	0	0	0	0	0	0	0	0	0	0	0	0	0	0	0	0	0	0	0
X3206	Endomyxa-Ascetosporea	Haplosporida	Haplosporidiidae	Haplosporidiidae_X	Haplosporidiidae_X_sp.	0	0	0	0	0	0	0	0	0	0	0	0	0	0	0	0	0	0	0	0	0	0	0	0	0	0	0	0	0	0	0	0	0	0	0	0	0	0	0	0	0	0	0	0
X4213	Endomyxa-Ascetosporea	Haplosporida	Haplosporidiidae	Minchinia	Minchinia_mercenariae	0	0	0	0	0	0	0	0	0	0	0	0	0	0	0	0	0	0	0	0	0	0	0	0	0	0	0	0	0	0	1	0	0	0	0	0	0	0	0	0	0	0	0	0
X2857	Endomyxa-Ascetosporea	Haplosporida	Haplosporidiidae	NA	NA	15	1	0	3	0	0	3	0	1	0	0	0	0	0	0	0	4	1	0	0	0	0	0	0	0	0	0	0	0	0	0	0	0	0	0	0	0	0	0	0	0	0	0	0
X3266	Endomyxa-Ascetosporea	Haplosporida	Haplosporidiidae	NA	NA	0	0	0	1	1	0	0	0	0	0	0	0	0	0	1	0	0	0	0	0	0	0	0	1	0	0	2	0	0	0	0	0	0	0	1	0	0	0	0	0	1	1	0	0
X4193	Endomyxa-Phytomyxea	Plasmodiophorida	Polymyxa-lineage	NA	NA	0	0	0	0	0	0	0	0	0	0	0	0	0	0	0	0	0	0	0	0	0	0	0	0	0	0	0	0	0	0	0	0	0	0	0	0	0	0	0	0	0	0	0	0
X1726	Endomyxa-Phytomyxea	Phagomyxida	Phagomyxidae	Phagomyxa	Phagomyxa_sp.	0	0	0	1	0	0	0	0	0	0	0	0	0	0	0	0	0	0	0	0	0	0	0	0	1	0	0	0	1	3	0	0	0	0	0	0	0	0	0	0	0	2	0	1
X2410	Endomyxa-Phytomyxea	Phagomyxida	Phagomyxidae	Phagomyxa	Phagomyxa_odontellae	0	0	0	0	0	0	0	0	0	0	0	0	0	0	0	0	0	0	0	0	0	1	0	0	0	0	1	0	0	0	0	0	0	0	0	0	0	0	0	0	0	0	0	0
X2903	Endomyxa-Phytomyxea	Phagomyxida	Phagomyxidae	Phagomyxa	Phagomyxa_sp.	0	0	0	0	0	0	0	0	1	0	0	0	0	0	0	0	0	0	0	0	0	0	0	0	0	0	0	0	0	0	0	0	0	0	0	0	0	0	0	0	0	0	0	0
X2980	Endomyxa-Phytomyxea	Phagomyxida	Phagomyxidae	Phagomyxa	Phagomyxa_sp.	0	0	1	0	0	0	0	1	0	0	0	2	2	0	0	0	0	0	0	0	0	0	0	0	0	0	0	0	0	0	0	0	0	0	0	0	0	0	0	0	0	0	0	0
X3465	Endomyxa-Phytomyxea	Phagomyxida	Phagomyxidae	Phagomyxa	Phagomyxa_sp.	0	0	0	0	0	0	0	0	0	0	0	0	0	0	2	0	0	0	0	0	0	0	0	0	0	0	0	0	0	0	0	0	0	0	0	0	0	0	1	0	0	0	0	0
X3789	Endomyxa-Phytomyxea	Phagomyxida	Phagomyxidae	Phagomyxa	Phagomyxa_sp.	0	0	1	0	0	0	0	0	0	0	0	0	0	2	0	0	0	0	0	0	0	0	0	0	0	0	1	0	0	0	0	0	0	0	0	0	0	0	0	0	0	0	0	0
X1046	Entoprocta	Entoprocta_X	Entoprocta_XX	Barentsia	Barentsia_gracilis	0	0	0	0	0	0	0	0	0	0	0	0	0	0	0	0	0	0	0	0	0	0	0	2	0	1	0	0	0	0	5	0	0	1	0	2	0	0	0	0	0	2	3	1
X3873	Entoprocta	Entoprocta_X	Entoprocta_XX	NA	NA	0	0	0	0	0	0	0	0	0	0	0	0	0	0	0	0	0	0	0	0	0	0	0	0	0	0	0	0	0	0	0	0	0	0	0	0	2	0	0	0	0	0	0	0
X3232	Euglenozoa	Kinetoplastida	Bodonidae	Bodo	Bodo_saltans	0	0	0	0	0	1	0	0	0	2	3	0	3	6	0	0	0	0	0	0	0	0	0	0	0	0	0	1	0	0	0	0	0	0	0	0	0	0	0	0	0	0	0	0
X3224	Euglenozoa	Kinetoplastida	Bodonidae	Bodonidae_X	Bodonidae_X_sp.	0	0	4	0	0	1	1	0	0	0	1	0	0	5	0	2	0	0	0	0	0	1	0	0	0	0	0	0	0	0	0	1	0	0	0	0	0	0	0	0	0	0	0	0
X1043	Euglenozoa	Diplonemea	Diplonemida	Diplonema	NA	2	2	0	4	2	0	6	1	7	10	4	1	3	5	2	6	1	0	4	0	2	5	4	0	0	1	5	17	1	3	0	0	0	1	0	0	0	0	0	0	0	0	0	0
X1245	Euglenozoa	Diplonemea	Diplonemida	Diplonema	NA	0	0	2	1	1	5	0	1	0	0	3	0	4	19	0	0	0	2	2	0	0	2	0	0	0	0	2	2	0	1	0	0	0	1	0	0	0	1	0	1	5	0	4	2
X1613	Euglenozoa	Diplonemea	Diplonemida	Diplonema	NA	0	0	1	0	1	7	0	0	3	4	1	0	0	15	0	3	0	1	0	0	0	2	0	0	1	0	3	4	0	1	0	3	0	0	3	0	0	0	0	1	0	0	2	0
X1716	Euglenozoa	Diplonemea	Diplonemida	Diplonema	NA	0	0	0	0	0	0	0	0	0	3	0	0	0	1	2	0	1	0	0	0	4	1	0	1	0	1	4	2	0	1	0	1	0	3	1	4	0	0	2	0	0	0	0	1
X1850	Euglenozoa	Diplonemea	Diplonemida	Diplonema	Diplonema_sp.	0	0	0	0	1	2	1	1	0	1	0	0	0	2	2	3	0	0	0	0	0	0	0	0	0	1	1	1	2	2	0	0	0	0	0	0	0	0	1	0	0	0	0	0
X2113	Euglenozoa	Diplonemea	Diplonemida	Diplonema	NA	0	0	0	0	0	3	0	1	0	0	5	0	2	7	1	0	0	0	0	0	0	1	0	0	0	0	0	4	0	1	0	4	0	0	1	0	0	0	0	1	0	0	3	0
X2225	Euglenozoa	Diplonemea	Diplonemida	Diplonema	NA	0	0	1	1	0	1	0	1	0	0	4	0	0	2	2	0	0	0	0	0	0	0	0	0	0	0	1	7	0	0	0	0	0	0	1	0	0	0	0	1	2	0	0	2
X2261	Euglenozoa	Diplonemea	Diplonemida	Diplonema	Diplonema_sp.	3	0	1	0	0	0	0	0	0	0	0	0	0	0	0	0	0	0	0	0	0	0	0	0	0	0	2	0	0	0	0	0	0	0	0	0	0	0	0	0	0	0	0	0
X2270	Euglenozoa	Diplonemea	Diplonemida	Diplonema	Diplonema_ambulator	0	0	0	3	0	0	0	0	0	0	0	0	0	12	0	0	0	1	0	0	0	0	0	0	0	0	2	2	0	1	0	0	0	0	0	0	0	0	0	1	3	0	0	0
X2394	Euglenozoa	Diplonemea	Diplonemida	Diplonema	Diplonema_sp.	4	0	0	0	2	0	1	0	0	0	0	0	0	0	0	0	0	0	0	0	0	0	0	0	0	0	0	0	0	0	0	0	0	0	0	0	0	0	0	0	0	0	0	0
X2403	Euglenozoa	Diplonemea	Diplonemida	Diplonema	NA	0	0	0	1	0	1	0	0	0	3	0	0	0	7	0	0	0	0	0	0	0	0	0	0	0	0	0	3	0	0	0	4	0	0	0	0	0	0	0	0	4	0	0	0
X2466	Euglenozoa	Diplonemea	Diplonemida	Diplonema	NA	0	0	0	0	2	3	0	0	0	0	1	0	0	3	0	0	0	1	0	0	0	0	0	0	0	0	0	3	0	1	0	0	0	1	0	0	0	0	0	2	0	0	0	1
X2510	Euglenozoa	Diplonemea	Diplonemida	Diplonema	NA	0	0	0	0	0	0	0	1	0	0	0	0	0	0	0	0	0	0	0	0	0	0	0	0	0	0	0	0	0	0	0	0	0	0	0	0	0	0	0	0	0	0	0	0
X2677	Euglenozoa	Diplonemea	Diplonemida	Diplonema	NA	0	0	1	0	0	1	0	0	0	0	1	0	1	3	0	0	0	0	0	0	0	0	0	0	0	0	0	0	0	0	0	6	0	0	0	0	0	0	0	0	0	0	0	3
X2712	Euglenozoa	Diplonemea	Diplonemida	Diplonema	NA	0	0	0	1	0	0	0	0	0	0	0	0	0	0	0	0	0	1	0	0	0	0	0	0	0	0	0	0	0	0	0	0	0	0	0	0	0	0	0	0	0	0	0	1
X2766	Euglenozoa	Diplonemea	Diplonemida	Diplonema	Diplonema_ambulator	0	0	0	0	1	1	0	1	3	0	3	0	0	0	1	1	1	0	0	0	0	0	0	0	0	0	0	1	0	0	0	0	0	0	0	0	0	0	0	0	1	0	1	0
X2775	Euglenozoa	Diplonemea	Diplonemida	Diplonema	Diplonema_ambulator	0	0	0	0	0	1	0	0	0	0	0	0	0	5	0	0	0	0	0	0	0	0	0	0	0	0	0	0	0	0	0	0	0	0	0	1	0	0	0	1	0	0	3	1
X2804	Euglenozoa	Diplonemea	Diplonemida	Diplonema	Diplonema_ambulator	0	0	0	0	0	1	0	0	1	0	1	0	1	1	0	0	0	1	0	0	0	0	0	0	0	0	0	5	0	0	0	0	0	0	0	0	0	0	0	0	0	0	0	0
X2872	Euglenozoa	Diplonemea	Diplonemida	Diplonema	Diplonema_ambulator	0	0	0	0	0	0	0	0	0	0	0	0	0	7	1	2	0	0	0	0	0	0	0	0	0	0	1	0	0	0	0	0	0	0	0	0	0	0	0	0	0	0	0	0
X3056	Euglenozoa	Diplonemea	Diplonemida	Diplonema	NA	0	0	1	0	0	2	0	0	0	0	0	0	1	7	0	0	0	0	0	0	0	0	0	0	0	0	0	0	0	0	0	0	0	0	1	0	0	0	0	0	0	0	1	0
X3170	Euglenozoa	Diplonemea	Diplonemida	Diplonema	Diplonema_ambulator	0	0	2	0	2	1	0	0	0	0	0	0	0	4	0	0	0	0	0	0	0	0	0	0	0	0	0	0	0	0	0	1	0	1	1	1	0	0	0	0	0	0	0	0
X3177	Euglenozoa	Diplonemea	Diplonemida	Diplonema	NA	0	0	0	0	0	3	0	0	1	0	1	0	1	2	0	0	0	0	0	0	0	0	0	0	0	0	0	0	0	0	0	0	0	0	0	0	0	0	0	0	5	0	0	0
X32	Euglenozoa	Diplonemea	Diplonemida	Diplonema	NA	0	0	670	428	205	2506	0	305	667	267	1555	46	259	7928	258	429	82	90	16	18	1	94	0	0	71	0	671	2216	0	355	0	439	8	240	293	61	0	281	0	493	831	0	831	810
X3213	Euglenozoa	Diplonemea	Diplonemida	Diplonema	NA	0	0	0	0	0	0	0	0	1	0	0	0	0	4	0	0	0	0	0	0	0	0	0	0	0	0	0	0	0	1	0	0	0	0	0	0	0	0	0	0	0	0	0	1
X3227	Euglenozoa	Diplonemea	Diplonemida	Diplonema	NA	0	0	0	2	0	3	0	0	0	0	2	0	0	4	0	2	0	0	0	0	0	0	0	0	0	0	0	0	0	0	0	0	0	0	0	0	0	0	0	1	0	0	0	0
X3231	Euglenozoa	Diplonemea	Diplonemida	Diplonema	NA	0	0	0	0	0	3	0	0	0	0	0	0	0	1	0	0	0	0	0	0	0	0	0	0	0	0	0	6	0	0	0	0	0	0	0	0	0	0	0	0	0	0	0	0
X3315	Euglenozoa	Diplonemea	Diplonemida	Diplonema	NA	0	0	0	0	5	0	0	0	0	0	2	0	0	4	0	3	0	0	0	0	0	0	0	0	0	0	0	0	0	0	0	0	0	2	0	0	0	0	0	0	0	0	0	0
X3326	Euglenozoa	Diplonemea	Diplonemida	Diplonema	NA	0	0	2	0	0	0	0	0	0	0	1	0	0	3	0	0	0	0	0	0	0	0	0	0	0	0	0	0	0	0	0	0	0	0	0	0	0	1	0	0	0	0	0	1
X3331	Euglenozoa	Diplonemea	Diplonemida	Diplonema	NA	0	0	0	2	0	0	0	0	0	0	2	0	0	4	0	0	0	0	0	0	0	0	0	0	0	0	1	0	0	0	0	0	0	0	0	0	0	0	0	0	0	0	0	4
X3334	Euglenozoa	Diplonemea	Diplonemida	Diplonema	Diplonema_ambulator	0	0	0	0	0	0	0	0	0	0	1	0	0	0	0	0	0	0	0	0	0	0	0	0	0	0	0	0	0	0	0	0	0	0	0	0	0	0	0	0	0	0	1	0
X3383	Euglenozoa	Diplonemea	Diplonemida	Diplonema	NA	0	0	0	1	0	0	0	0	0	0	0	0	0	1	0	0	0	0	0	0	0	0	0	0	0	0	0	4	0	0	0	0	0	0	0	0	0	0	0	0	0	0	0	0
X3397	Euglenozoa	Diplonemea	Diplonemida	Diplonema	Diplonema_ambulator	0	0	0	0	0	0	0	0	0	0	1	0	0	0	0	0	0	0	0	0	0	0	0	0	0	0	0	4	0	0	0	0	0	2	0	0	0	0	0	0	0	0	3	0
X3427	Euglenozoa	Diplonemea	Diplonemida	Diplonema	NA	0	0	4	0	0	0	0	0	1	0	0	0	0	3	0	0	0	0	0	0	0	0	0	0	0	0	0	0	0	0	0	0	0	0	0	0	0	0	0	0	0	0	0	1
X3439	Euglenozoa	Diplonemea	Diplonemida	Diplonema	NA	0	0	0	0	0	2	0	0	0	0	0	0	0	3	0	0	0	0	0	0	0	0	0	0	0	0	0	0	0	0	0	0	0	0	0	0	0	2	0	0	7	0	0	0
X3447	Euglenozoa	Diplonemea	Diplonemida	Diplonema	NA	0	0	4	0	0	0	0	1	0	0	1	0	0	1	0	0	0	0	0	0	0	0	0	0	0	0	0	0	0	0	0	0	0	0	0	0	0	0	0	0	0	0	0	0
X3454	Euglenozoa	Diplonemea	Diplonemida	Diplonema	Diplonema_ambulator	0	0	0	0	0	0	0	0	0	0	0	0	0	0	0	0	0	0	0	0	0	0	0	0	0	0	0	0	0	0	0	0	0	0	0	0	0	0	0	0	0	0	0	0
X3455	Euglenozoa	Diplonemea	Diplonemida	Diplonema	NA	0	0	0	0	0	0	0	0	0	0	0	0	0	2	0	0	0	0	0	0	0	0	0	0	0	0	1	0	0	0	0	0	0	0	0	0	0	0	0	0	4	0	0	0
X3491	Euglenozoa	Diplonemea	Diplonemida	Diplonema	NA	0	0	0	0	0	0	0	0	1	0	0	0	0	0	0	0	0	0	0	0	0	0	0	0	0	0	0	0	0	0	0	0	0	0	0	0	0	0	0	2	0	0	1	0
X3497	Euglenozoa	Diplonemea	Diplonemida	Diplonema	Diplonema_ambulator	0	0	0	0	0	0	0	0	0	0	0	0	0	0	0	0	0	0	0	0	0	0	0	0	0	0	0	0	0	0	0	0	0	0	0	0	0	0	0	0	0	0	0	0
X3504	Euglenozoa	Diplonemea	Diplonemida	Diplonema	NA	0	0	0	0	0	1	0	0	0	0	0	0	0	0	0	1	0	0	0	0	0	0	0	0	0	0	0	7	0	1	0	0	0	0	0	0	0	0	0	0	0	0	0	0
X3510	Euglenozoa	Diplonemea	Diplonemida	Diplonema	NA	0	0	0	1	0	0	0	0	0	0	1	0	0	3	1	0	0	0	0	0	0	0	0	0	0	0	0	0	0	1	0	0	0	0	0	0	0	0	0	0	0	0	0	0
X3511	Euglenozoa	Diplonemea	Diplonemida	Diplonema	NA	0	0	0	0	0	0	0	0	0	0	0	0	0	2	0	0	0	0	0	0	0	0	0	0	0	0	2	0	0	0	0	0	0	0	0	0	0	0	0	0	0	0	0	0
X3546	Euglenozoa	Diplonemea	Diplonemida	Diplonema	Diplonema_ambulator	0	0	0	2	0	0	0	0	1	0	0	0	0	1	0	0	0	0	0	0	0	0	0	0	0	0	0	0	0	0	0	0	0	0	0	0	0	0	0	0	0	0	0	0
X3550	Euglenozoa	Diplonemea	Diplonemida	Diplonema	NA	0	0	0	2	0	0	0	0	0	0	1	0	0	5	2	0	0	0	0	0	0	0	0	0	0	0	0	0	0	0	0	0	0	0	0	0	0	1	0	0	0	0	0	1
X3590	Euglenozoa	Diplonemea	Diplonemida	Diplonema	Diplonema_ambulator	0	0	2	1	0	1	0	0	1	0	0	0	0	1	0	0	0	0	0	0	0	0	0	0	0	0	1	0	0	0	0	0	0	0	0	0	0	0	0	0	0	0	0	0
X3599	Euglenozoa	Diplonemea	Diplonemida	Diplonema	NA	0	0	0	1	0	3	0	0	0	0	0	0	1	2	0	0	0	0	0	0	0	0	0	0	0	0	0	1	0	0	0	0	0	0	0	0	0	0	0	1	0	0	0	0
X3600	Euglenozoa	Diplonemea	Diplonemida	Diplonema	Diplonema_ambulator	0	0	0	0	0	1	0	0	0	0	1	0	0	0	0	0	0	0	0	0	0	0	0	0	0	0	0	2	0	0	0	0	0	0	0	0	0	0	0	0	0	0	0	3
X3601	Euglenozoa	Diplonemea	Diplonemida	Diplonema	NA	0	0	0	1	0	1	0	0	0	0	0	0	0	1	0	0	0	0	0	0	0	0	0	0	0	0	0	0	0	0	0	0	0	0	0	0	0	0	0	0	0	0	0	0
X3604	Euglenozoa	Diplonemea	Diplonemida	Diplonema	NA	0	0	0	1	0	0	0	0	0	1	1	0	0	0	0	0	0	0	0	0	0	0	0	0	0	0	1	0	0	0	0	0	0	0	1	0	0	0	0	0	0	0	0	0
X3609	Euglenozoa	Diplonemea	Diplonemida	Diplonema	NA	0	0	0	0	0	0	0	0	0	0	2	0	0	0	0	0	0	0	0	0	0	0	0	0	0	0	0	0	0	0	0	0	0	0	0	0	0	0	0	0	0	0	0	0
X3668	Euglenozoa	Diplonemea	Diplonemida	Diplonema	Diplonema_papillatum	0	0	0	0	0	0	0	0	0	0	2	0	0	1	0	0	0	0	0	0	0	0	0	0	0	0	0	0	0	0	0	2	0	0	0	0	0	0	0	0	0	0	0	0
X3717	Euglenozoa	Diplonemea	Diplonemida	Diplonema	Diplonema_ambulator	0	0	0	0	0	2	0	0	0	0	2	0	0	2	0	0	0	0	0	0	0	0	0	0	0	0	0	0	0	0	0	0	0	0	0	0	0	0	0	0	0	0	0	0
X3721	Euglenozoa	Diplonemea	Diplonemida	Diplonema	Diplonema_ambulator	0	0	0	1	0	1	0	0	0	0	1	0	0	1	0	0	0	0	0	0	0	0	0	0	0	0	0	0	0	0	0	0	0	1	0	0	0	0	0	0	0	0	0	0
X3729	Euglenozoa	Diplonemea	Diplonemida	Diplonema	Diplonema_ambulator	0	0	2	1	0	0	0	0	0	0	1	0	0	1	0	0	0	0	0	0	0	0	0	0	0	0	0	0	0	0	0	0	0	0	0	0	0	0	0	0	0	0	0	0
X3732	Euglenozoa	Diplonemea	Diplonemida	Diplonema	NA	0	0	0	0	0	0	0	0	0	0	0	0	0	0	0	0	0	0	0	0	0	0	0	0	0	0	0	4	0	0	0	0	0	0	0	0	0	0	0	0	0	0	2	1
X3733	Euglenozoa	Diplonemea	Diplonemida	Diplonema	Diplonema_ambulator	0	0	0	0	0	0	0	1	0	0	0	0	0	0	0	0	0	0	0	0	0	0	0	0	0	0	0	0	0	1	0	0	0	0	0	0	0	0	0	0	0	0	1	0
X3738	Euglenozoa	Diplonemea	Diplonemida	Diplonema	Diplonema_ambulator	0	0	0	0	0	0	0	1	0	0	0	0	0	0	0	0	0	0	0	0	0	1	0	0	0	0	1	0	0	0	0	0	0	0	0	0	0	0	0	0	0	0	0	0
X3783	Euglenozoa	Diplonemea	Diplonemida	Diplonema	NA	0	0	0	0	0	0	0	0	0	0	0	0	0	0	0	0	0	0	0	0	0	0	0	0	0	0	0	0	0	0	0	0	0	0	0	0	0	0	0	0	0	0	0	0
X3786	Euglenozoa	Diplonemea	Diplonemida	Diplonema	Diplonema_ambulator	0	0	0	0	0	0	0	0	0	0	0	0	0	0	0	0	0	0	0	0	0	0	0	0	0	0	0	2	0	0	0	0	0	0	0	0	0	0	0	0	0	0	0	0
X3792	Euglenozoa	Diplonemea	Diplonemida	Diplonema	NA	0	0	0	0	0	0	0	0	0	0	0	0	0	3	0	0	0	0	0	0	0	0	0	0	0	0	0	0	0	0	0	0	0	0	0	0	0	0	0	0	0	0	0	0
X3800	Euglenozoa	Diplonemea	Diplonemida	Diplonema	NA	0	0	0	0	0	0	0	0	0	0	0	0	0	1	0	0	0	1	0	0	0	0	0	0	0	0	0	3	0	0	0	0	0	0	0	0	0	0	0	0	0	0	0	0
X3807	Euglenozoa	Diplonemea	Diplonemida	Diplonema	NA	0	0	0	0	0	0	0	0	0	0	0	0	0	0	0	0	0	0	0	0	0	0	0	0	0	0	0	0	0	0	2	0	0	0	0	0	0	0	0	0	0	1	0	0
X3828	Euglenozoa	Diplonemea	Diplonemida	Diplonema	Diplonema_sp.	0	0	0	0	0	0	0	0	0	0	0	0	0	0	0	0	0	0	0	0	0	0	0	0	0	0	0	0	0	0	0	0	0	0	0	0	0	0	0	0	0	0	0	0
X3835	Euglenozoa	Diplonemea	Diplonemida	Diplonema	NA	0	0	0	0	0	3	0	1	0	2	0	0	0	1	0	0	0	0	0	0	0	0	0	0	0	0	0	0	0	1	0	0	0	0	0	0	0	0	0	0	0	0	1	1
X3838	Euglenozoa	Diplonemea	Diplonemida	Diplonema	Diplonema_ambulator	0	0	0	0	0	1	0	0	0	4	0	0	1	1	0	0	0	0	0	0	0	0	0	0	0	0	0	0	0	0	0	0	0	0	0	0	0	0	0	0	0	0	0	0
X3839	Euglenozoa	Diplonemea	Diplonemida	Diplonema	NA	0	0	0	0	0	1	0	0	0	0	0	0	0	1	0	0	0	0	0	0	0	0	0	0	0	0	1	0	0	0	0	0	0	0	0	0	0	0	0	2	0	0	0	1
X3848	Euglenozoa	Diplonemea	Diplonemida	Diplonema	NA	0	0	0	0	0	0	0	0	0	0	0	0	0	3	0	0	0	0	0	0	0	0	0	0	0	0	0	0	0	0	0	0	0	0	1	0	0	0	0	1	0	0	0	0
X3858	Euglenozoa	Diplonemea	Diplonemida	Diplonema	Diplonema_sp.	0	0	0	0	0	0	0	0	0	0	0	0	0	0	0	0	0	0	0	0	0	0	0	0	0	0	0	0	0	0	0	0	0	0	0	0	0	0	0	0	0	0	0	0
X3859	Euglenozoa	Diplonemea	Diplonemida	Diplonema	Diplonema_ambulator	0	0	0	0	0	0	0	0	0	0	0	0	1	3	0	0	0	0	0	0	0	0	0	0	1	0	0	0	0	0	0	0	0	0	0	0	0	0	0	0	0	0	0	0
X3861	Euglenozoa	Diplonemea	Diplonemida	Diplonema	NA	0	0	0	0	0	0	0	0	0	0	0	0	2	1	0	0	1	0	0	0	0	0	0	0	0	0	0	3	0	0	0	2	0	0	0	0	0	0	0	0	0	0	0	0
X3910	Euglenozoa	Diplonemea	Diplonemida	Diplonema	NA	0	0	2	0	0	4	0	0	0	0	1	0	0	0	0	0	0	0	0	0	0	0	0	0	0	0	0	0	0	0	0	0	0	0	0	0	0	0	0	0	0	0	0	0
X3911	Euglenozoa	Diplonemea	Diplonemida	Diplonema	NA	0	0	0	0	0	2	0	0	0	1	1	0	0	4	0	0	0	0	0	0	0	0	0	0	0	0	0	0	0	0	0	0	0	0	0	0	0	0	0	0	0	0	0	0
X3924	Euglenozoa	Diplonemea	Diplonemida	Diplonema	Diplonema_ambulator	0	0	0	0	0	0	0	0	0	0	0	0	0	0	0	0	0	0	0	0	0	0	0	0	0	0	0	0	0	0	0	0	0	0	0	0	0	0	0	0	0	0	0	0
X3930	Euglenozoa	Diplonemea	Diplonemida	Diplonema	Diplonema_ambulator	0	0	0	0	0	0	0	0	0	0	0	0	0	3	0	0	0	0	0	0	0	0	0	0	0	0	0	4	0	0	0	0	0	0	0	1	0	0	0	0	1	0	0	0
X3948	Euglenozoa	Diplonemea	Diplonemida	Diplonema	Diplonema_ambulator	0	0	0	0	0	0	0	0	0	0	0	0	0	0	0	0	0	0	0	0	0	0	0	0	0	0	0	0	0	0	0	0	0	0	0	0	0	0	0	0	0	0	0	0
X3965	Euglenozoa	Diplonemea	Diplonemida	Diplonema	NA	0	0	0	0	0	0	0	0	0	0	0	0	0	3	0	0	0	0	0	0	0	0	0	0	0	0	0	0	0	0	0	0	0	0	0	0	0	0	0	1	0	0	0	0
X3982	Euglenozoa	Diplonemea	Diplonemida	Diplonema	Diplonema_ambulator	0	0	0	0	0	0	0	0	0	0	2	0	2	3	0	0	0	0	0	0	0	0	0	0	0	0	1	0	0	0	0	0	0	0	0	0	0	0	0	0	0	0	0	0
X3992	Euglenozoa	Diplonemea	Diplonemida	Diplonema	NA	0	0	0	0	0	0	0	0	0	0	0	0	0	0	0	0	0	0	0	0	0	0	0	0	0	0	0	0	0	0	0	0	0	0	0	0	0	0	0	0	0	0	0	0
X4014	Euglenozoa	Diplonemea	Diplonemida	Diplonema	Diplonema_ambulator	1	0	0	0	0	0	0	0	0	0	0	0	0	0	0	0	0	0	0	0	0	0	0	0	0	0	0	0	0	0	0	0	0	0	0	0	0	0	0	0	0	0	0	0
X4031	Euglenozoa	Diplonemea	Diplonemida	Diplonema	Diplonema_ambulator	0	0	0	0	0	0	0	0	0	2	1	0	0	0	0	0	0	0	0	0	0	0	0	0	0	0	0	0	0	0	0	0	0	0	0	0	0	0	0	2	0	0	0	1
X4033	Euglenozoa	Diplonemea	Diplonemida	Diplonema	Diplonema_sp.	0	0	0	0	0	0	0	0	0	1	0	0	0	0	0	0	0	0	0	0	0	0	0	0	0	0	0	0	0	0	0	0	0	5	0	0	0	0	0	0	0	0	0	0
X4044	Euglenozoa	Diplonemea	Diplonemida	Diplonema	NA	0	0	0	0	0	0	0	0	0	0	0	0	1	1	0	0	0	0	0	0	0	0	0	0	0	0	0	1	0	0	0	0	0	0	0	0	0	0	0	0	0	0	0	0
X4045	Euglenozoa	Diplonemea	Diplonemida	Diplonema	NA	0	0	0	0	0	0	0	0	0	0	0	0	1	2	0	0	0	0	0	0	0	0	0	0	0	0	0	2	0	0	0	0	0	1	0	0	0	0	0	0	0	0	0	0
X4058	Euglenozoa	Diplonemea	Diplonemida	Diplonema	NA	0	0	0	0	0	0	0	0	0	0	0	0	0	2	0	0	0	0	0	0	0	0	0	0	0	0	0	6	0	0	0	0	0	0	0	0	0	0	0	0	0	0	0	0
X4071	Euglenozoa	Diplonemea	Diplonemida	Diplonema	Diplonema_ambulator	0	0	0	0	0	0	0	0	0	0	0	0	0	0	0	0	0	0	0	0	0	0	0	0	0	0	0	0	0	0	0	0	0	0	0	0	0	0	0	0	0	0	0	0
X4103	Euglenozoa	Diplonemea	Diplonemida	Diplonema	Diplonema_ambulator	0	0	0	0	0	0	0	0	0	0	0	0	0	0	0	0	0	0	0	0	0	0	0	0	0	0	0	0	0	0	0	0	0	0	0	0	0	0	0	2	0	0	0	0
X4105	Euglenozoa	Diplonemea	Diplonemida	Diplonema	Diplonema_ambulator	0	0	0	0	0	3	0	0	0	0	0	0	0	2	0	0	0	0	0	0	0	0	0	0	0	0	0	1	0	0	0	0	0	0	0	0	0	0	0	0	1	0	0	0
X4109	Euglenozoa	Diplonemea	Diplonemida	Diplonema	Diplonema_sp.	0	0	0	0	0	0	0	0	0	3	0	0	0	0	0	0	0	0	0	0	0	0	0	0	0	0	0	0	0	0	0	0	0	0	0	0	0	0	0	0	0	0	0	0
X4114	Euglenozoa	Diplonemea	Diplonemida	Diplonema	Diplonema_ambulator	0	0	1	0	0	0	0	0	0	0	0	0	0	0	0	2	0	0	0	0	0	0	0	0	0	0	0	0	0	0	0	0	0	0	0	0	0	0	0	0	0	0	0	0
X4120	Euglenozoa	Diplonemea	Diplonemida	Diplonema	NA	0	0	0	0	0	0	0	0	0	0	0	0	0	1	0	0	0	0	0	0	0	0	0	0	0	0	0	0	0	0	0	0	0	1	0	0	0	0	0	0	0	0	0	0
X4122	Euglenozoa	Diplonemea	Diplonemida	Diplonema	Diplonema_ambulator	0	0	0	0	0	0	0	1	0	0	0	0	0	1	0	0	0	0	0	0	0	0	0	0	0	0	0	0	0	0	0	0	0	0	0	0	0	0	0	0	0	0	0	0
X4123	Euglenozoa	Diplonemea	Diplonemida	Diplonema	NA	0	0	0	0	0	0	0	0	0	0	0	0	0	0	0	0	0	0	0	0	0	0	0	0	0	0	0	0	0	0	0	0	0	0	0	0	0	0	0	0	0	0	0	1
X4124	Euglenozoa	Diplonemea	Diplonemida	Diplonema	NA	0	0	0	0	0	0	0	0	0	0	0	0	0	3	0	1	0	0	0	0	0	0	0	0	0	0	0	0	0	0	0	0	0	0	0	0	0	0	0	0	0	0	0	0
X4210	Euglenozoa	Diplonemea	Diplonemida	Diplonema	Diplonema_papillatum	0	0	0	0	0	0	0	0	0	0	0	0	0	0	0	0	0	0	0	0	0	0	0	0	0	0	0	0	0	0	0	0	1	0	0	0	0	0	0	0	0	0	0	0
X4211	Euglenozoa	Diplonemea	Diplonemida	Diplonema	NA	0	0	0	0	0	0	0	0	0	0	0	0	0	0	0	0	0	0	0	0	0	0	0	0	0	0	0	0	0	0	0	0	0	2	0	0	0	0	0	0	0	0	0	0
X4257	Euglenozoa	Diplonemea	Diplonemida	Diplonema	NA	0	0	0	0	0	0	0	0	0	0	0	0	0	0	0	0	0	0	0	0	0	0	0	1	0	0	0	0	0	0	1	0	0	0	0	0	0	0	0	0	0	0	0	0
X4389	Euglenozoa	Diplonemea	Diplonemida	Diplonema	Diplonema_ambulator	0	0	0	0	0	0	0	0	0	0	0	0	0	0	0	0	0	0	0	0	0	0	0	0	0	0	0	0	0	0	0	0	0	0	0	0	0	0	1	0	0	0	0	0
X4406	Euglenozoa	Diplonemea	Diplonemida	Diplonema	Diplonema_ambulator	0	0	0	0	0	0	2	0	0	0	0	0	0	0	0	0	0	0	0	0	0	0	0	0	0	0	0	0	0	0	0	0	0	0	0	0	0	0	0	0	0	0	0	0
X4409	Euglenozoa	Diplonemea	Diplonemida	Diplonema	Diplonema_ambulator	0	0	0	0	0	0	0	0	0	0	0	0	0	0	0	0	0	0	0	0	0	0	0	0	0	0	0	0	0	0	0	0	0	0	0	0	0	0	0	0	0	0	0	0
X576	Euglenozoa	Diplonemea	Diplonemida	Diplonema	Diplonema_ambulator	0	0	11	7	0	46	0	5	9	3	26	1	7	111	1	8	1	0	0	0	0	2	0	0	3	0	11	34	0	5	0	5	0	3	2	0	0	4	0	9	1	0	9	13
X1111	Euglenozoa	Diplonemea	Diplonemea_X	Diplonemea_XX	Diplonemea_XX_sp.	1	0	0	2	0	0	0	0	0	0	0	0	1	0	0	0	1	1	1	0	10	4	7	3	9	12	25	3	19	8	2	1	0	6	2	7	0	0	0	3	17	11	13	4
X1818	Euglenozoa	Diplonemea	Diplonemea_X	Diplonemea_XX	Diplonemea_XX_sp.	0	0	0	0	0	0	0	0	0	0	0	0	0	1	3	0	0	1	1	0	3	1	1	2	1	6	7	2	4	0	1	2	0	4	0	0	2	1	0	5	20	3	3	0
X2155	Euglenozoa	Diplonemea	Diplonemea_X	Diplonemea_XX	Diplonemea_XX_sp.	0	0	7	0	0	0	0	0	0	0	0	0	0	0	0	0	0	0	0	0	2	0	0	0	2	1	8	1	4	1	1	2	0	5	0	1	2	2	1	2	11	5	3	0
X3390	Euglenozoa	Diplonemea	Diplonemea_X	Diplonemea_XX	Diplonemea_XX_sp.	0	0	0	1	0	0	1	0	0	1	0	0	0	0	0	0	0	0	0	0	2	1	1	0	1	0	1	0	3	0	0	0	0	0	0	0	0	0	0	0	1	0	1	0
X3634	Euglenozoa	Diplonemea	Diplonemea_X	Diplonemea_XX	Diplonemea_XX_sp.	0	0	0	0	0	0	0	0	0	0	0	0	0	0	0	0	0	0	0	0	0	0	0	0	0	0	0	0	0	0	0	0	0	0	0	0	0	0	0	1	3	5	0	1
X692	Euglenozoa	Diplonemea	Diplonemea_X	Diplonemea_XX	Diplonemea_XX_sp.	2	0	0	0	0	0	0	0	0	8	1	1	1	0	9	10	5	6	7	0	19	17	5	2	10	28	59	25	12	6	2	16	0	18	8	3	0	0	0	11	55	43	25	6
X3576	Euglenozoa	Diplonemea	DSPD-1	DSPD-1_X	DSPD-1_X_sp.	0	0	0	0	0	0	0	0	0	0	0	0	0	0	0	0	0	0	0	0	0	0	0	0	0	0	0	0	0	0	0	0	0	0	0	0	0	0	0	0	0	0	0	0
X4369	Euglenozoa	Kinetoplastida	Neobodonid	Klosteria	Klosteria_bodomorphis	0	0	0	0	0	0	3	0	0	0	0	0	0	0	0	0	0	0	0	0	0	0	0	0	0	0	0	0	0	0	0	0	0	0	0	0	0	0	0	0	0	0	0	0
X3201	Euglenozoa	Diplonemea	NA	NA	NA	0	0	0	0	0	0	0	0	0	0	0	0	0	0	0	0	0	0	0	0	0	0	0	0	0	0	0	4	0	1	0	0	0	0	0	0	0	0	0	0	0	0	0	1
X4046	Euglenozoa	Diplonemea	Diplonemea_X	NA	NA	0	0	0	0	0	0	0	0	0	0	0	0	0	0	0	0	0	0	0	0	0	0	0	0	0	0	0	0	0	0	0	0	0	0	0	0	0	0	0	0	0	0	0	0
X4104	Euglenozoa	Diplonemea	NA	NA	NA	0	0	0	0	0	0	0	0	0	0	0	0	0	5	0	0	0	0	0	0	0	0	0	0	0	0	0	0	0	0	0	0	0	0	0	0	0	0	0	0	0	0	0	0
X4106	Euglenozoa	Diplonemea	NA	NA	NA	0	0	0	0	0	2	0	0	0	0	0	0	0	1	0	0	0	0	0	0	0	0	0	0	0	0	0	3	0	0	0	0	0	0	0	0	0	0	0	0	0	0	0	0
X621	Euglenozoa	Diplonemea	NA	NA	NA	7	7	11	10	12	5	13	9	6	49	7	1	4	8	6	4	2	1	5	2	3	8	4	2	3	7	25	15	25	4	9	18	3	21	8	16	2	5	6	14	8	6	2	3
X2483	Euglenozoa	Euglenida	Euglenales	NA	NA	4	2	6	5	8	1	1	1	0	0	0	0	0	0	0	0	0	0	0	0	0	0	0	0	0	0	0	0	0	0	0	0	0	0	0	0	0	0	0	0	0	0	0	0
X3300	Euglenozoa	Euglenida	NA	NA	NA	0	0	0	0	0	0	0	0	0	0	0	0	0	0	0	0	0	0	0	0	0	0	0	0	0	0	0	0	0	0	0	0	0	0	0	0	0	0	0	0	1	0	0	0
X4244	Euglenozoa	Euglenida	Euglenales	NA	NA	0	0	0	0	0	0	0	0	0	0	0	0	0	0	0	0	0	0	0	0	0	0	0	0	0	0	0	0	0	0	0	0	0	0	0	0	0	0	0	0	0	0	0	0
X4292	Euglenozoa	Euglenida	Euglenales	NA	NA	0	0	0	0	0	0	0	0	0	0	0	0	0	0	0	0	0	0	0	0	0	0	0	0	0	0	0	0	0	0	0	0	0	0	0	0	0	0	0	0	0	0	0	0
X3384	Euglenozoa	Kinetoplastida	NA	NA	NA	0	0	4	0	0	2	2	2	0	0	0	0	0	4	0	0	0	0	0	0	0	0	0	0	0	0	0	1	0	0	0	0	0	1	0	0	0	0	0	1	0	0	0	0
X3866	Euglenozoa	Kinetoplastida	Neobodonid	NA	NA	0	0	0	0	0	0	0	0	0	0	0	0	0	0	2	0	0	0	0	0	0	1	0	0	0	0	0	0	0	0	0	0	0	0	0	0	0	0	0	0	0	0	0	0
X4309	Euglenozoa	Kinetoplastida	Neobodonid	NA	NA	0	0	0	0	0	0	0	0	0	0	0	0	0	0	0	0	0	0	0	0	0	0	0	0	0	0	0	0	0	0	0	0	0	0	0	0	0	0	0	0	0	0	0	0
X4322	Euglenozoa	Kinetoplastida	NA	NA	NA	0	0	0	2	0	0	0	0	0	0	0	0	0	0	0	0	1	0	0	0	0	0	0	0	0	0	0	1	0	0	0	0	0	0	0	0	0	0	0	0	0	0	0	0
X1501	Euglenozoa	NA	NA	NA	NA	0	0	4	1	0	0	0	0	1	0	0	0	0	0	0	0	0	0	0	0	0	0	0	0	0	0	3	0	0	0	0	0	0	0	2	13	0	5	0	0	4	0	1	1
X3052	Euglenozoa	NA	NA	NA	NA	0	0	0	0	0	1	0	0	0	0	0	0	0	2	2	0	0	0	0	0	0	0	0	0	0	0	0	0	0	0	0	0	0	0	0	0	0	0	0	2	0	0	0	0
X3512	Euglenozoa	NA	NA	NA	NA	0	0	0	0	0	0	0	0	0	0	0	0	0	4	0	3	0	1	0	0	0	0	0	0	0	0	0	0	0	0	0	0	0	0	0	0	0	0	0	0	0	0	0	0
X3545	Euglenozoa	NA	NA	NA	NA	0	0	0	0	0	0	0	0	1	5	2	0	0	0	0	3	0	0	0	0	0	0	0	0	0	0	0	0	0	0	0	0	0	0	0	0	0	0	0	0	0	0	0	0
X3558	Euglenozoa	NA	NA	NA	NA	0	0	0	0	0	1	0	0	0	0	1	0	1	1	0	0	0	0	0	0	0	0	0	0	0	0	0	0	0	0	0	0	0	0	0	0	0	0	0	0	0	0	0	0
X3836	Euglenozoa	NA	NA	NA	NA	0	0	0	0	0	2	0	0	0	0	1	0	0	1	0	0	0	0	0	0	0	0	0	0	0	0	2	0	0	0	0	0	0	0	0	0	0	0	0	0	4	0	0	0
X3849	Euglenozoa	NA	NA	NA	NA	0	0	0	1	0	0	0	0	0	0	0	0	0	2	0	0	0	0	0	0	0	0	0	0	0	0	0	5	0	0	0	0	0	0	0	0	0	0	0	0	0	0	0	0
X3969	Euglenozoa	NA	NA	NA	NA	0	0	0	0	0	1	0	0	0	0	0	0	0	1	0	0	0	0	0	0	0	0	0	0	0	0	0	0	0	0	0	0	0	0	0	0	0	0	0	0	0	0	0	0
X4047	Euglenozoa	NA	NA	NA	NA	0	0	0	0	0	0	0	0	0	0	0	0	0	0	0	0	0	0	0	0	0	0	0	0	0	0	0	7	0	0	0	0	0	0	0	0	0	0	0	0	0	0	0	0
X4312	Euglenozoa	NA	NA	NA	NA	0	0	2	0	0	0	0	0	0	0	0	0	0	1	0	0	0	0	0	0	0	0	0	0	0	0	0	0	0	0	0	0	0	0	0	0	0	0	0	0	0	0	0	0
X4321	Euglenozoa	NA	NA	NA	NA	0	0	0	2	0	0	0	0	0	0	0	0	0	0	0	0	0	0	0	0	0	0	0	0	0	0	0	0	0	0	0	0	0	0	0	0	0	0	0	0	0	0	0	0
X1969	Euglenozoa	Kinetoplastida	Neobodonid	Neobodo	Neobodo_designis	3	0	0	0	0	0	0	0	0	0	0	0	0	0	0	0	0	0	0	0	0	0	0	0	0	0	0	0	0	1	0	0	0	0	0	0	0	0	0	1	0	0	0	0
X2539	Euglenozoa	Kinetoplastida	Neobodonid	Neobodo	Neobodo_designis	0	0	0	0	0	0	1	0	0	0	2	0	0	3	5	6	0	0	2	0	2	1	1	0	0	0	1	0	0	1	0	0	0	0	0	0	0	0	0	0	0	0	0	0
X3321	Euglenozoa	Kinetoplastida	Neobodonid	Neobodo	Neobodo_sp.	0	0	0	0	0	0	0	0	0	1	0	0	0	0	0	0	0	0	0	0	0	1	0	0	0	0	0	0	0	0	0	0	0	0	0	0	0	0	0	0	0	0	0	0
X3379	Euglenozoa	Kinetoplastida	Neobodonid	Neobodo	Neobodo_sp.	0	0	0	0	0	0	0	0	0	0	0	0	1	0	0	2	0	0	0	0	0	0	0	0	0	1	0	1	0	0	0	0	0	1	0	0	0	0	0	0	0	2	0	0
X3607	Euglenozoa	Kinetoplastida	Neobodonid	Neobodo	Neobodo_saliens	0	0	0	1	0	0	1	0	0	0	2	0	1	0	0	1	0	1	0	0	0	1	0	0	0	0	0	0	0	0	0	0	0	0	0	0	0	0	0	0	0	0	0	0
X3718	Euglenozoa	Kinetoplastida	Neobodonid	Neobodo	Neobodo_designis	0	0	0	0	0	2	0	0	0	0	0	0	0	2	0	0	0	0	0	0	0	1	0	0	0	1	0	0	1	1	0	0	0	0	0	0	0	0	0	0	0	0	0	0
X4319	Euglenozoa	Kinetoplastida	Neobodonid	Neobodo	Neobodo_designis	0	0	0	0	0	0	3	0	0	0	0	0	0	0	0	0	0	0	0	0	0	0	0	0	0	0	0	0	0	0	0	0	0	0	0	0	0	0	0	0	0	0	0	0
X912	Euglenozoa	Kinetoplastida	Neobodonid	Neobodo	Neobodo_sp.	1	1	6	8	7	2	9	6	4	26	14	7	17	3	14	26	0	8	5	3	7	15	6	0	1	2	4	9	3	1	4	3	0	1	1	5	0	0	0	0	3	5	2	1
X2023	Euglenozoa	Kinetoplastida	Neobodonid	Neobodonid_X	Neobodonid_X_sp.	1	2	1	0	0	1	20	2	0	0	0	0	1	1	0	0	0	0	0	0	2	1	1	0	0	0	0	0	0	1	0	0	0	0	0	0	0	0	2	0	0	6	0	0
X3400	Euglenozoa	Kinetoplastida	Neobodonid	Neobodonid_X	Neobodonid_X_sp.	0	0	0	1	0	0	0	0	0	0	0	0	0	0	0	0	2	1	3	0	4	1	0	2	0	0	0	0	0	0	0	0	0	0	0	0	0	0	0	0	0	0	0	0
X3710	Euglenozoa	Kinetoplastida	Neobodonid	Neobodonid_X	Neobodonid_X_sp.	0	1	0	0	0	0	0	0	0	0	0	0	0	0	0	0	0	0	0	0	0	0	0	0	0	0	0	0	0	0	0	0	0	0	0	0	0	0	0	0	0	0	0	0
X2905	Euglenozoa	Euglenida	Petalomonadales	Notosolenus	Notosolenus_urceolatus	0	1	4	3	0	0	4	0	1	2	1	0	0	0	0	3	0	0	1	0	0	0	0	0	0	0	2	2	0	0	0	0	0	0	0	0	0	0	0	0	0	0	1	0
X3673	Euglenozoa	Euglenida	Petalomonadales	Notosolenus	Notosolenus_urceolatus	0	0	0	0	0	0	2	0	0	0	0	0	0	0	0	0	0	1	0	0	0	0	0	0	0	0	0	0	0	0	0	0	0	0	0	0	0	0	0	0	0	1	0	0
X3940	Euglenozoa	Euglenida	Petalomonadales	Notosolenus	Notosolenus_ostium	0	0	0	0	0	0	0	0	0	0	0	0	0	0	0	0	0	0	0	0	0	0	0	0	0	0	0	0	0	0	0	0	0	0	0	0	0	0	0	0	0	0	0	0
X4383	Euglenozoa	Euglenida	Petalomonadales	Notosolenus	Notosolenus_ostium	0	0	0	0	0	0	0	0	0	0	0	0	0	0	0	0	0	0	0	0	0	0	0	0	0	0	0	0	0	0	0	0	0	0	0	0	0	0	0	0	0	0	0	0
X4407	Euglenozoa	Euglenida	Petalomonadales	Notosolenus	Notosolenus_ostium	0	0	0	0	0	0	0	0	0	0	0	0	0	0	0	0	0	0	0	0	0	0	0	0	0	0	0	0	0	0	0	0	0	0	0	0	0	0	0	0	0	0	0	0
X433	Euglenozoa	Euglenida	Petalomonadales	Petalomonadales_X	Petalomonadales_X_sp.	29	39	29	72	49	16	72	23	15	93	28	6	19	50	55	32	14	1	13	0	2	6	17	1	8	14	22	23	23	7	5	7	0	19	3	13	0	1	1	1	0	4	2	1
X4392	Euglenozoa	Euglenida	Petalomonadales	Petalomonadales_X	Petalomonadales_X_sp.	0	0	0	0	0	0	0	0	0	0	0	0	0	0	0	0	0	0	0	0	0	0	0	0	0	0	0	0	0	0	0	0	0	0	0	0	0	0	0	0	0	0	0	0
X789	Euglenozoa	Euglenida	Petalomonadales	Petalomonadales_X	Petalomonadales_X_sp.	13	9	7	14	15	2	19	8	3	24	11	2	5	7	9	19	7	1	2	1	2	5	6	0	1	2	11	5	9	1	0	1	0	1	1	1	0	0	0	0	0	0	2	0
X2553	Euglenozoa	Euglenida	Petalomonadales	Petalomonas	Petalomonas_cantuscygni	1	3	0	0	0	0	1	0	0	0	0	0	0	0	0	0	0	0	0	0	0	0	2	1	0	0	0	0	14	0	5	0	0	0	0	0	1	0	0	0	0	5	0	0
X3621	Euglenozoa	Euglenida	Petalomonadales	Petalomonas	Petalomonas_cantuscygni	0	0	0	0	0	0	0	0	0	0	0	0	0	0	1	0	0	0	0	0	0	0	0	0	0	0	0	0	0	0	0	0	0	0	0	0	0	0	0	0	0	0	0	0
X3740	Euglenozoa	Euglenida	Petalomonadales	Petalomonas	Petalomonas_cantuscygni	0	0	0	0	0	0	0	0	0	0	0	0	0	1	0	0	0	0	0	0	0	0	0	0	0	0	0	0	0	0	0	0	0	1	0	0	0	1	0	0	4	0	1	0
X3802	Euglenozoa	Euglenida	Petalomonadales	Petalomonas	Petalomonas_cantuscygni	0	0	0	0	0	0	0	0	0	0	0	0	0	0	0	1	0	0	0	0	0	0	1	0	0	0	0	0	0	0	0	0	0	0	0	0	0	0	0	0	0	0	0	0
X3893	Euglenozoa	Euglenida	Petalomonadales	Petalomonas	Petalomonas_sphagnophila	3	0	0	0	0	0	0	0	0	4	0	0	0	0	0	0	0	0	0	0	0	0	0	0	0	0	0	0	0	0	0	0	0	0	0	0	0	0	0	0	0	0	0	0
X3954	Euglenozoa	Euglenida	Petalomonadales	Petalomonas	Petalomonas_cantuscygni	1	0	0	0	0	0	0	0	0	0	0	0	0	0	1	0	0	0	0	0	0	0	0	0	0	0	0	1	0	0	0	0	0	1	0	0	0	0	0	0	0	0	0	0
X4073	Euglenozoa	Euglenida	Petalomonadales	Petalomonas	Petalomonas_cantuscygni	0	0	0	0	0	0	0	0	0	0	0	0	0	0	0	0	0	0	0	0	0	0	0	0	0	0	0	0	0	0	0	0	0	0	0	0	0	0	0	0	0	0	0	0
X4231	Euglenozoa	Euglenida	Petalomonadales	Petalomonas	Petalomonas_sphagnophila	0	0	0	0	0	0	0	0	0	0	0	0	0	0	0	0	0	0	0	0	0	0	0	0	0	0	0	0	0	0	0	0	0	0	0	0	0	0	0	0	0	0	0	0
X4393	Euglenozoa	Euglenida	Petalomonadales	Petalomonas	Petalomonas_cantuscygni	0	0	0	0	0	0	0	0	0	0	0	0	0	0	0	0	0	0	0	0	0	0	0	0	0	0	0	0	0	0	0	0	0	0	0	0	0	0	0	0	0	0	0	0
X4417	Euglenozoa	Kinetoplastida	Prokinetoplastidae	PLO	PLO_of	0	0	0	0	0	0	0	0	0	0	0	0	0	0	0	0	0	0	0	0	0	0	0	0	0	0	0	2	0	0	0	0	0	0	0	0	0	0	0	0	0	0	0	0
X755	Euglenozoa	Kinetoplastida	Parabodonid	Procryptobia	Procryptobia_sorokini	21	1	1	0	0	2	11	1	0	0	1	0	2	2	2	3	0	2	0	0	2	0	0	3	1	0	1	3	71	0	12	0	0	3	1	0	2	0	1	2	0	17	1	3
X3086	Euglenozoa	Kinetoplastida	Neobodonid	Rhynchomonas	Rhynchomonas_nasuta	1	1	1	1	2	0	0	1	0	4	1	0	2	1	0	0	0	0	0	0	0	0	0	0	0	0	0	2	0	0	0	1	0	0	0	0	0	0	0	0	0	0	0	0
X3723	Euglenozoa	Kinetoplastida	Neobodonid	Rhynchomonas	Rhynchomonas_nasuta	0	0	0	0	0	0	0	0	0	1	1	0	1	3	1	0	0	0	0	0	0	0	0	0	0	0	2	0	0	0	0	0	0	0	0	0	0	0	0	0	0	0	0	0
X2120	Euglenozoa	Diplonemea	Diplonemea_X	Rhynchopus	Rhynchopus_sp.	0	0	0	0	0	0	0	0	0	0	0	0	0	0	0	0	0	0	0	0	0	0	0	0	0	0	0	0	0	0	0	0	0	0	2	1	0	2	0	0	3	0	3	6
X2291	Euglenozoa	Diplonemea	Diplonemea_X	Rhynchopus	Rhynchopus_sp.	0	0	0	0	0	0	0	1	2	1	0	0	0	0	0	1	0	0	0	0	0	0	1	0	0	0	0	0	0	0	0	0	0	0	0	0	0	0	0	0	0	0	0	0
X2554	Euglenozoa	Diplonemea	Diplonemea_X	Rhynchopus	Rhynchopus_sp.	1	0	0	0	0	1	1	0	1	0	0	0	0	2	0	1	0	0	1	0	0	0	0	0	0	0	0	0	0	0	0	0	0	0	0	0	0	0	0	0	0	0	0	0
X3172	Euglenozoa	Diplonemea	Diplonemea_X	Rhynchopus	Rhynchopus_sp.	0	0	0	0	2	1	2	0	0	0	0	0	0	2	0	1	0	0	0	0	0	1	0	0	0	2	1	0	0	0	0	0	0	1	0	0	0	0	0	0	1	0	0	1
X3495	Euglenozoa	Diplonemea	Diplonemea_X	Rhynchopus	Rhynchopus_sp.	0	0	1	0	0	0	0	0	1	0	1	0	0	0	1	0	0	1	0	0	0	1	0	0	0	0	0	2	0	0	0	0	0	0	0	0	0	0	0	0	0	0	0	1
X3832	Euglenozoa	Diplonemea	Diplonemea_X	Rhynchopus	Rhynchopus_sp.	0	0	0	0	0	0	0	0	0	0	0	0	1	1	0	0	0	0	0	0	0	0	0	0	0	0	0	0	0	0	0	0	0	0	0	0	0	0	0	0	0	0	0	0
X4265	Eukaryota_XXX	Eukaryota_XXXX	Eukaryota_XXXXX	Eukaryota_XXXXXX	Eukaryota_XXXXXX_sp.	0	0	0	0	0	0	0	0	0	0	0	1	0	1	0	0	0	0	0	0	0	1	0	0	0	0	0	0	0	0	0	0	0	1	0	0	0	0	0	0	0	0	0	0
X2397	Eustigmatophyceae	Eustigmatophyceae_X	Eustigmatophyceae_XX	Monodus	Monodus_sp.	0	0	0	0	1	0	3	0	0	3	0	0	0	2	0	0	0	0	0	1	0	0	0	1	0	1	0	4	0	4	2	0	0	6	0	0	0	0	0	1	0	0	0	1
X1082	Eustigmatophyceae	Eustigmatophyceae_X	Eustigmatophyceae_XX	Nannochloropsis	Nannochloropsis_oceanica	0	0	4	3	1	1	0	0	2	1	0	0	0	2	0	0	0	1	2	0	6	5	5	3	1	2	1	13	8	5	2	8	0	5	0	4	3	1	1	1	0	1	0	0
[truncated: 2,464 more rows]
[truncated: 9 more columns]

## Sheet: 2020 10 μm
tax#	class	order	family	genus	species	2020-03-02	2020-03-03	2020-03-04	2020-03-05	2020-03-06	2020-03-09	2020-03-10	2020-03-11	2020-03-16	2020-03-17	2020-03-18	2020-03-19	2020-03-20	2020-03-23	2020-03-24	2020-03-25	2020-03-26	2020-03-27	2020-03-30	2020-03-31	2020-04-01	2020-04-02	2020-04-03	2020-04-06	2020-04-07	2020-04-08	2020-04-09	2020-04-14	2020-04-15	2020-04-16	2020-04-17	2020-04-20	2020-04-21	2020-04-22	2020-04-23	2020-04-24	2020-04-27	2020-04-28	2020-04-29	2020-04-30	2020-05-04	2020-05-05	2020-05-06	2020-05-07
X1712	Ichthyosporea	Ichthyosphonida	Abeoformidae_Group_MAIP_1	Abeoformidae_Group_MAIP_1_X	Abeoformidae_Group_MAIP_1_X_sp.	0	0	0	0	0	0	0	0	0	0	0	0	0	0	0	0	0	0	0	0	0	0	0	0	0	0	0	0	0	0	0	0	0	0	0	0	0	0	0	0	0	0	0	0
X2859	Ichthyosporea	Ichthyosphonida	Abeoformidae_Group_MAIP_1	Abeoformidae_Group_MAIP_1_X	Abeoformidae_Group_MAIP_1_X_sp.	0	0	0	0	0	0	0	0	0	0	0	0	0	0	0	0	0	0	0	0	0	0	1	0	0	0	0	0	0	0	0	0	0	0	0	0	0	0	0	0	0	0	0	0
X2868	Ichthyosporea	Ichthyosphonida	Abeoformidae_Group_MAIP_1	Abeoformidae_Group_MAIP_1_X	Abeoformidae_Group_MAIP_1_X_sp.	0	0	0	0	0	0	0	0	0	0	0	0	0	0	0	0	0	0	0	0	0	0	0	0	0	0	0	0	0	0	0	0	0	0	0	0	0	0	0	0	0	0	0	0
X3054	Ichthyosporea	Ichthyosphonida	Abeoformidae_Group_MAIP_1	Abeoformidae_Group_MAIP_1_X	Abeoformidae_Group_MAIP_1_X_sp.	0	0	0	0	0	0	0	0	0	1	0	0	0	10	0	0	0	0	0	0	0	0	0	0	0	0	0	0	0	0	0	0	0	0	0	0	0	0	0	0	0	0	0	0
X423	Ichthyosporea	Ichthyosphonida	Abeoformidae_Group_MAIP_1	Abeoformidae_Group_MAIP_1_X	Abeoformidae_Group_MAIP_1_X_sp.	5	11	0	1	8	1	5	8	14	2	12	0	0	34	1	2	0	0	1	2	0	0	3	0	0	0	0	0	1	0	0	1	0	0	0	1	0	0	0	0	0	0	0	0
X118	Ichthyosporea	Ichthyosphonida	Abeoformidae_Group_MAIP_2	Abeoformidae_Group_MAIP_2_X	Abeoformidae_Group_MAIP_2_X_sp.	6	0	0	0	6	1	6	45	53	36	9	2	3	114	15	2	0	0	4	5	2	0	2	0	1	0	0	0	0	0	0	0	0	0	0	1	0	0	0	0	0	0	0	0
X2271	Ichthyosporea	Ichthyosphonida	Abeoformidae_Group_MAIP_2	Abeoformidae_Group_MAIP_2_X	Abeoformidae_Group_MAIP_2_X_sp.	0	0	0	0	0	1	1	0	0	0	0	0	0	0	0	0	1	0	0	0	0	0	0	1	0	0	0	0	0	0	0	0	0	0	0	0	0	0	0	0	0	0	1	0
X3589	Ichthyosporea	Ichthyosphonida	Abeoformidae_Group_MAIP_2	Abeoformidae_Group_MAIP_2_X	Abeoformidae_Group_MAIP_2_X_sp.	0	1	0	0	0	0	0	0	0	0	0	0	0	0	0	0	0	0	0	0	0	0	0	0	0	0	0	0	0	0	0	0	0	0	0	0	0	0	0	0	0	0	0	0
X90	Ichthyosporea	Ichthyosphonida	Abeoformidae_Group_MAIP_2	Abeoformidae_Group_MAIP_2_X	Abeoformidae_Group_MAIP_2_X_sp.	78	48	12	7	54	5	26	53	53	25	10	2	0	262	19	6	1	2	9	17	7	3	13	9	6	2	4	6	0	2	1	5	7	6	4	9	8	3	4	1	0	0	4	8
X1834	Acantharea	Acantharea_X	Acantharea_XX	Acantharea_XXX	Acantharea_XXX_sp.	1	0	0	0	1	0	0	0	1	0	0	0	0	0	0	0	0	0	0	0	0	0	0	0	0	0	0	0	0	0	0	0	0	0	0	0	0	0	0	0	0	0	0	0
X2136	Acantharea	Acantharea_X	Acantharea_XX	Acantharea_XXX	Acantharea_XXX_sp.	0	0	0	0	0	1	0	0	0	2	0	0	0	0	0	0	0	0	0	0	0	0	0	0	0	0	0	0	0	0	0	0	0	0	0	0	0	0	0	0	0	0	0	0
X2639	Acantharea	Acantharea_X	Acantharea_XX	Acantharea_XXX	Acantharea_XXX_sp.	0	0	0	0	0	0	0	2	0	0	0	0	0	0	0	0	0	0	0	1	0	0	0	0	0	0	0	0	0	0	0	0	0	0	0	0	0	0	0	0	0	0	0	0
X2837	Acantharea	Acantharea_X	Acantharea_XX	Acantharea_XXX	Acantharea_XXX_sp.	0	0	0	0	0	1	0	0	0	0	0	0	0	0	0	0	0	0	0	0	0	0	0	0	0	0	0	0	0	0	0	0	0	0	0	0	0	0	0	0	0	0	0	0
X730	Acantharea	Acantharea_X	Acantharea_XX	Acantharea_XXX	Acantharea_XXX_sp.	0	0	0	0	0	1	0	0	0	0	0	0	0	0	0	0	0	0	1	0	0	0	0	2	0	0	0	0	0	0	0	0	0	0	0	0	0	0	0	0	0	0	0	0
X3979	Acantharea	Acantharea-Group-I	Acantharea-Group-I_X	Acantharea-Group-I_XX	Acantharea-Group-I_XX_sp.	0	0	0	0	0	0	0	0	0	0	0	0	0	0	0	0	0	0	0	0	0	0	0	0	0	0	0	0	0	0	0	0	0	0	0	0	0	0	0	0	0	0	0	0
X1718	Mollusca	Bivalvia	Heteroconchia	Acanthocardia	Acanthocardia_tuberculata	0	0	0	0	0	0	0	0	0	0	0	0	0	0	0	0	0	0	0	0	0	62	0	2	27	0	0	0	0	0	0	0	0	0	0	0	0	0	0	0	0	0	0	0
X2878	Choanoflagellatea	Acanthoecida	Acanthoecidae_Group_G	Acanthoecidae_Group_G_X	Acanthoecidae_Group_G_X_sp.	0	0	0	0	0	0	0	0	0	0	0	0	0	0	0	0	0	0	0	0	0	0	0	0	0	0	0	0	0	0	0	0	0	0	0	0	0	0	0	0	0	0	0	0
X1503	Arthropoda	Crustacea	Maxillopoda	Acartia	Acartia_bifilosa	0	0	0	0	0	0	0	0	0	0	0	0	1	0	0	0	0	0	0	0	0	0	0	0	0	0	0	0	0	0	0	0	11	78	0	0	0	0	0	0	0	0	0	0
X1823	Arthropoda	Crustacea	Maxillopoda	Acartia	Acartia_bifilosa	0	0	0	0	0	0	0	0	0	0	0	0	0	0	0	0	0	0	0	0	0	0	0	0	0	0	0	0	0	0	0	0	3	1	0	0	0	0	0	0	0	0	0	0
X1907	Arthropoda	Crustacea	Maxillopoda	Acartia	Acartia_bifilosa	0	0	0	0	0	0	0	0	0	0	0	0	0	0	0	0	0	0	0	0	0	0	0	0	0	0	0	0	0	0	0	0	43	0	0	0	0	0	0	0	0	0	0	0
X2843	Arthropoda	Crustacea	Maxillopoda	Acartia	Acartia_bifilosa	0	0	0	0	0	0	1	0	0	0	0	0	0	0	0	0	0	0	0	0	0	0	0	0	0	0	0	0	0	0	0	0	1	1	0	0	0	0	0	0	0	0	0	0
X3103	Arthropoda	Crustacea	Maxillopoda	Acartia	Acartia_bifilosa	0	0	0	0	0	0	2	0	0	0	0	0	0	0	0	0	0	0	0	0	0	0	0	0	0	0	0	0	0	0	0	0	3	7	0	0	0	0	0	0	0	0	0	0
X3150	Arthropoda	Crustacea	Maxillopoda	Acartia	Acartia_bifilosa	0	0	0	0	0	0	5	0	0	0	0	0	0	0	0	0	0	0	0	0	0	0	0	0	0	0	0	0	0	0	0	0	1	1	0	0	0	0	0	0	0	0	0	0
X368	Arthropoda	Crustacea	Maxillopoda	Acartia	Acartia_bifilosa	2	0	0	0	0	0	38	2	0	0	0	0	93	0	0	0	0	0	0	0	0	0	0	0	0	0	0	0	0	0	0	0	89	459	0	0	0	0	0	0	0	0	0	0
X671	Arthropoda	Crustacea	Maxillopoda	Acartia	Acartia_bifilosa	0	0	0	0	0	0	104	0	0	0	0	0	8	0	0	0	0	0	0	0	0	0	0	0	0	0	0	0	0	0	0	0	50	108	0	0	0	0	0	0	0	0	0	0
X903	Arthropoda	Crustacea	Maxillopoda	Acartia	Acartia_bifilosa	0	0	0	0	0	0	1	0	0	0	0	0	0	0	0	0	0	0	0	0	0	0	0	0	0	0	0	0	0	0	0	0	4	5	0	0	0	0	0	0	0	0	0	0
X1036	Arthropoda	Crustacea	Maxillopoda	Acartia	Acartia_clausii	0	0	0	4	0	1	0	2	0	0	0	0	0	0	1	0	0	0	0	2	1	0	0	0	0	0	0	0	0	0	0	0	0	0	0	0	0	0	0	0	0	0	0	0
X1215	Arthropoda	Crustacea	Maxillopoda	Acartia	Acartia_clausii	0	0	0	3	0	0	0	1	0	0	0	0	0	0	4	0	0	0	1	0	0	0	0	0	0	1	0	0	3	1	0	0	1	1	0	0	1	1	1	4	0	2	1	1
X1277	Arthropoda	Crustacea	Maxillopoda	Acartia	Acartia_clausii	0	0	0	3	1	0	0	1	1	0	0	0	0	0	1	0	0	0	1	0	0	0	1	0	0	0	0	0	0	0	0	0	0	0	0	0	0	0	1	0	0	0	0	0
X1364	Arthropoda	Crustacea	Maxillopoda	Acartia	Acartia_clausii	0	0	0	0	0	0	0	0	0	0	0	0	0	0	1	0	1	0	2	0	0	1	0	0	0	0	0	0	0	0	0	0	0	0	0	1	0	0	1	1	0	0	0	0
X1451	Arthropoda	Crustacea	Maxillopoda	Acartia	Acartia_clausii	0	0	0	0	1	0	0	0	0	0	0	0	0	0	3	0	1	0	1	0	0	0	1	0	0	0	0	0	0	0	0	0	0	0	0	0	0	0	0	0	0	0	0	0
X1512	Arthropoda	Crustacea	Maxillopoda	Acartia	Acartia_clausii	0	0	0	2	0	0	0	1	0	0	0	0	0	0	1	0	0	0	1	1	0	0	0	0	0	0	0	0	0	0	0	0	0	0	0	0	0	0	2	0	0	0	0	0
X1553	Arthropoda	Crustacea	Maxillopoda	Acartia	Acartia_clausii	0	0	0	2	0	1	0	2	0	0	2	2	1	0	0	0	2	0	1	7	0	0	1	0	0	0	0	0	0	0	0	1	0	1	0	0	0	1	1	0	2	0	0	1
X162	Arthropoda	Crustacea	Maxillopoda	Acartia	Acartia_clausii	1	0	0	79	8	0	16	25	0	0	7	50	86	2	141	29	96	45	126	12	1	21	20	46	0	41	1	16	32	80	0	63	21	70	0	94	91	47	105	52	112	57	66	86
X1651	Arthropoda	Crustacea	Maxillopoda	Acartia	Acartia_clausii	0	0	0	0	0	0	0	0	0	0	0	0	0	0	1	0	0	0	0	0	0	0	0	0	0	0	0	1	0	0	0	0	0	0	0	0	0	0	0	0	0	0	0	0
X1667	Arthropoda	Crustacea	Maxillopoda	Acartia	Acartia_clausii	0	0	0	0	0	0	0	0	0	0	0	0	0	0	0	0	0	0	0	0	0	2	0	0	0	0	0	0	0	0	0	0	0	1	0	0	5	0	5	0	0	1	0	6
X1830	Arthropoda	Crustacea	Maxillopoda	Acartia	Acartia_clausii	0	0	0	0	0	0	0	0	0	0	0	0	0	0	0	0	0	0	0	0	0	1	0	0	0	0	0	0	0	1	0	0	0	0	0	0	0	0	0	0	0	0	0	1
X1854	Arthropoda	Crustacea	Maxillopoda	Acartia	Acartia_clausii	0	0	0	0	0	0	0	0	0	0	1	1	0	0	0	0	2	0	1	0	0	0	0	0	0	0	0	0	0	0	0	0	0	0	0	0	0	1	1	0	3	1	0	0
X1978	Arthropoda	Crustacea	Maxillopoda	Acartia	Acartia_clausii	0	0	0	0	0	1	0	2	0	0	0	0	0	0	1	0	0	0	0	0	1	0	0	0	0	0	0	1	0	0	0	0	0	0	0	5	0	1	0	0	2	0	2	4
X2	Arthropoda	Crustacea	Maxillopoda	Acartia	Acartia_clausii	469	8	21	17197	1549	189	3246	7206	38	24	3339	10551	22252	471	38821	6464	27777	9574	28289	3169	500	5986	4402	12123	367	10256	901	2917	8317	18512	19	13670	4432	16574	1	24243	17953	11033	24273	10339	27627	14408	21553	20651
X2038	Arthropoda	Crustacea	Maxillopoda	Acartia	Acartia_clausii	0	0	0	0	0	0	0	0	0	0	0	0	0	0	0	0	0	0	0	0	0	0	0	0	0	0	0	0	0	0	0	0	0	0	0	0	0	0	0	0	0	0	0	0
X2062	Arthropoda	Crustacea	Maxillopoda	Acartia	Acartia_clausii	0	0	0	0	0	0	0	0	0	0	0	0	0	0	0	0	1	0	0	0	0	0	0	0	0	0	0	0	0	0	0	0	0	0	0	0	0	0	1	0	1	0	0	0
X2095	Arthropoda	Crustacea	Maxillopoda	Acartia	Acartia_clausii	0	0	0	0	2	0	0	7	0	0	1	0	3	0	8	0	0	0	1	0	0	1	2	5	0	0	1	0	2	2	0	2	1	0	0	1	0	0	7	0	0	0	0	0
X2197	Arthropoda	Crustacea	Maxillopoda	Acartia	Acartia_clausii	0	0	0	0	0	0	0	1	0	0	0	0	0	0	0	0	1	0	0	0	0	0	0	0	0	0	0	0	0	0	0	0	0	0	0	0	0	0	0	0	0	0	0	0
X2213	Arthropoda	Crustacea	Maxillopoda	Acartia	Acartia_clausii	0	0	0	0	0	0	0	0	0	0	0	0	0	0	0	0	0	0	0	0	0	0	0	0	0	0	0	0	0	0	0	0	0	0	0	0	0	0	0	0	0	0	0	0
X2274	Arthropoda	Crustacea	Maxillopoda	Acartia	Acartia_clausii	0	0	0	0	0	0	0	1	0	0	0	0	0	0	0	0	0	0	0	0	0	0	0	0	0	0	0	0	0	0	0	1	0	0	0	0	0	0	0	0	0	0	0	0
X2301	Arthropoda	Crustacea	Maxillopoda	Acartia	Acartia_clausii	0	0	0	0	0	0	0	0	0	0	0	1	1	0	0	0	0	0	45	0	0	0	0	0	0	0	0	0	0	0	0	0	0	0	0	0	0	0	1	0	0	0	0	0
X2409	Arthropoda	Crustacea	Maxillopoda	Acartia	Acartia_clausii	0	0	0	0	0	0	0	0	0	0	0	0	0	0	0	0	1	0	0	0	0	0	1	0	0	0	0	0	0	0	0	1	0	0	0	0	0	0	0	0	0	0	0	0
X2454	Arthropoda	Crustacea	Maxillopoda	Acartia	Acartia_clausii	0	0	0	1	0	0	0	0	0	0	0	0	0	0	1	0	0	0	0	1	0	0	1	1	0	0	0	0	0	0	0	0	0	0	0	0	0	0	0	0	0	0	0	0
X2577	Arthropoda	Crustacea	Maxillopoda	Acartia	Acartia_clausii	0	0	0	0	0	0	0	0	0	0	0	0	0	0	0	0	0	0	0	0	0	0	0	0	0	0	0	0	0	0	0	0	0	0	0	0	0	0	0	0	0	0	0	0
X2578	Arthropoda	Crustacea	Maxillopoda	Acartia	Acartia_clausii	0	0	0	0	0	0	0	0	0	0	0	0	0	0	0	0	0	0	0	0	0	0	0	0	0	0	0	0	0	0	0	0	0	0	0	0	0	0	0	0	0	0	0	0
X2653	Arthropoda	Crustacea	Maxillopoda	Acartia	Acartia_clausii	0	0	0	0	0	0	0	0	0	0	0	0	0	0	0	0	0	0	0	0	0	0	0	1	0	0	0	0	0	1	0	0	0	1	0	0	0	0	0	0	2	0	0	0
X2749	Arthropoda	Crustacea	Maxillopoda	Acartia	Acartia_clausii	0	0	0	0	0	0	0	0	0	0	0	0	4	0	0	0	3	0	0	0	0	0	0	0	0	0	1	4	0	0	0	0	0	0	0	0	0	1	2	0	0	0	0	0
X2865	Arthropoda	Crustacea	Maxillopoda	Acartia	Acartia_clausii	0	0	0	3	0	0	0	2	0	0	0	0	0	0	1	0	0	0	0	1	0	0	0	0	0	0	0	0	0	0	0	0	0	0	0	0	0	0	0	0	0	0	0	0
X2892	Arthropoda	Crustacea	Maxillopoda	Acartia	Acartia_clausii	0	0	0	0	0	0	0	0	0	0	0	0	0	0	0	0	0	0	0	0	0	0	0	0	0	0	0	0	0	0	0	0	0	0	0	0	0	0	0	0	0	0	0	0
X2904	Arthropoda	Crustacea	Maxillopoda	Acartia	Acartia_clausii	0	0	0	0	1	0	0	2	0	1	0	0	0	0	7	0	0	0	1	0	0	0	0	0	0	0	0	0	1	2	0	1	0	0	0	2	0	0	0	1	0	0	0	0
X2956	Arthropoda	Crustacea	Maxillopoda	Acartia	Acartia_clausii	0	0	0	0	0	0	0	0	0	0	0	0	0	0	0	0	0	0	0	0	1	0	1	2	0	1	0	0	1	0	0	0	0	0	0	0	0	0	0	0	0	0	0	0
X3023	Arthropoda	Crustacea	Maxillopoda	Acartia	Acartia_clausii	0	0	0	0	0	0	0	0	0	0	0	0	0	0	0	0	0	0	0	0	0	0	0	0	0	1	0	0	0	1	0	0	0	0	0	0	0	0	0	0	1	0	0	0
X3025	Arthropoda	Crustacea	Maxillopoda	Acartia	Acartia_clausii	0	0	0	2	0	0	0	2	0	0	0	0	0	0	0	0	0	0	0	0	0	0	1	0	0	0	0	0	0	0	0	0	0	0	0	0	0	0	0	0	0	0	0	0
X3070	Arthropoda	Crustacea	Maxillopoda	Acartia	Acartia_clausii	0	0	0	0	0	0	0	0	0	0	0	24	0	0	0	0	0	0	0	0	0	0	1	0	0	0	0	0	0	0	0	0	0	0	0	1	0	0	0	0	0	0	0	0
X3102	Arthropoda	Crustacea	Maxillopoda	Acartia	Acartia_clausii	0	0	0	2	0	0	0	1	0	0	0	0	0	0	0	0	0	0	1	0	0	0	0	0	0	0	0	0	0	0	0	0	0	0	0	0	0	0	1	0	0	0	0	0
X3112	Arthropoda	Crustacea	Maxillopoda	Acartia	Acartia_clausii	0	0	0	0	0	0	0	0	0	0	0	0	0	0	0	0	0	0	0	0	0	0	0	0	0	0	0	0	0	0	0	0	1	0	0	0	0	0	0	1	0	0	0	0
X319	Arthropoda	Crustacea	Maxillopoda	Acartia	Acartia_clausii	3	0	0	17	5	0	5	13	0	0	8	15	33	1	60	10	38	15	50	2	0	12	8	18	0	17	1	4	12	34	0	25	3	25	0	32	28	15	30	14	36	23	40	31
X3202	Arthropoda	Crustacea	Maxillopoda	Acartia	Acartia_clausii	0	0	0	0	0	0	0	0	0	0	0	0	0	0	0	0	0	0	0	0	0	0	0	0	0	0	0	0	0	0	0	0	0	0	0	0	0	0	0	0	0	0	0	1
X3238	Arthropoda	Crustacea	Maxillopoda	Acartia	Acartia_clausii	0	0	0	2	0	0	1	0	0	0	0	0	1	0	0	0	0	0	0	0	0	0	0	0	0	0	0	0	0	0	0	0	0	1	0	0	0	0	0	0	0	0	0	0
X3239	Arthropoda	Crustacea	Maxillopoda	Acartia	Acartia_clausii	0	0	0	1	0	0	0	0	0	0	0	0	0	0	0	0	0	0	0	0	0	0	0	0	0	0	0	0	0	0	0	1	0	0	0	0	0	0	0	0	0	0	0	0
X3299	Arthropoda	Crustacea	Maxillopoda	Acartia	Acartia_clausii	0	0	0	0	0	0	0	0	0	0	0	0	0	0	0	0	0	0	0	0	0	0	0	0	0	0	0	0	0	0	0	0	0	2	0	0	0	1	0	0	0	0	0	0
X3350	Arthropoda	Crustacea	Maxillopoda	Acartia	Acartia_clausii	0	0	0	0	0	0	0	0	0	0	0	0	0	0	0	0	0	0	0	0	0	0	0	0	0	0	0	0	0	0	0	0	1	0	0	0	0	0	1	0	1	0	0	0
X338	Arthropoda	Crustacea	Maxillopoda	Acartia	Acartia_clausii	1	0	0	15	1	0	7	10	0	0	4	13	30	0	56	6	29	15	37	7	1	13	11	19	1	10	3	2	11	31	0	20	7	29	0	25	20	14	34	14	46	21	29	24
X3386	Arthropoda	Crustacea	Maxillopoda	Acartia	Acartia_clausii	0	0	0	2	0	1	1	0	0	0	0	0	0	0	0	0	0	0	0	0	0	0	0	0	0	0	0	0	0	0	0	0	0	0	0	0	0	0	0	0	0	0	0	0
X3401	Arthropoda	Crustacea	Maxillopoda	Acartia	Acartia_clausii	0	0	0	12	0	0	0	0	0	0	0	0	0	0	0	0	0	0	0	0	0	0	0	0	0	0	0	0	0	0	0	0	0	0	0	0	0	0	0	0	0	0	0	0
X3557	Arthropoda	Crustacea	Maxillopoda	Acartia	Acartia_clausii	0	0	0	0	0	0	0	0	0	0	0	0	1	0	0	0	0	0	0	0	0	0	0	0	0	0	0	0	0	0	0	0	0	0	0	0	0	0	0	0	0	0	0	0
X356	Arthropoda	Crustacea	Maxillopoda	Acartia	Acartia_clausii	1	0	0	26	2	0	3	9	0	0	4	13	36	2	43	6	24	16	36	3	0	8	5	17	1	17	1	5	7	35	0	16	8	27	0	30	23	14	40	18	47	19	32	31
X3868	Arthropoda	Crustacea	Maxillopoda	Acartia	Acartia_clausii	0	0	0	0	0	0	0	0	0	0	0	0	0	0	0	0	0	0	1	0	0	0	0	0	0	0	0	0	0	0	0	0	0	0	0	0	0	0	0	0	0	0	0	0
X393	Arthropoda	Crustacea	Maxillopoda	Acartia	Acartia_clausii	0	0	0	16	1	1	6	5	0	0	2	16	15	1	34	6	24	11	28	4	1	9	6	15	0	8	1	5	11	23	0	22	4	22	0	30	29	12	30	11	27	13	22	23
X431	Arthropoda	Crustacea	Maxillopoda	Acartia	Acartia_clausii	0	0	0	1	0	1	0	2	0	0	0	0	28	0	0	0	0	0	0	0	0	0	0	0	0	0	0	3	0	0	0	0	0	5	0	46	0	0	95	1	57	2	0	0
X4382	Arthropoda	Crustacea	Maxillopoda	Acartia	Acartia_clausii	0	0	0	0	0	0	0	0	0	0	0	0	0	0	0	0	0	0	0	0	0	0	0	0	0	0	0	0	0	0	0	0	0	0	0	0	0	0	0	0	0	0	0	0
X548	Arthropoda	Crustacea	Maxillopoda	Acartia	Acartia_clausii	0	0	0	0	0	0	0	11	0	0	3	0	0	0	0	5	1	1	0	2	0	0	0	1	0	0	0	0	16	9	1	0	0	0	0	0	0	0	0	0	0	0	0	0
X637	Arthropoda	Crustacea	Maxillopoda	Acartia	Acartia_clausii	0	0	0	0	0	0	0	17	0	0	2	1	0	0	0	1	3	1	1	2	0	1	1	2	0	0	0	0	16	15	0	0	0	0	0	0	0	0	0	0	0	0	0	0
X788	Arthropoda	Crustacea	Maxillopoda	Acartia	Acartia_clausii	0	0	0	1	1	0	3	1	0	0	3	4	4	1	8	1	10	3	8	0	0	6	1	1	0	4	0	0	4	5	0	2	1	5	0	9	4	7	10	2	13	4	8	6
X937	Arthropoda	Crustacea	Maxillopoda	Acartia	Acartia_clausii	0	0	0	1	1	0	0	0	0	0	0	0	0	0	1	0	0	0	0	0	1	0	1	0	0	0	0	0	0	0	0	0	0	0	0	0	0	1	0	0	3	0	2	0
X1315	Arthropoda	Crustacea	Maxillopoda	Acartia	Acartia_tonsa	0	0	0	0	0	0	0	0	0	0	0	0	0	0	0	0	0	0	0	0	0	0	0	0	0	0	0	0	0	0	0	0	0	0	0	0	0	0	0	0	0	0	0	0
X1164	Bacillariophyta	Bacillariophyta_X	Raphid-pennate	Achnanthes	Achnanthes_sp.	0	0	0	0	0	0	0	0	0	0	0	0	1	0	1	0	0	0	0	1	0	0	1	0	0	0	0	0	1	0	0	0	2	0	0	0	0	0	0	0	0	0	0	0
X1945	Bacillariophyta	Bacillariophyta_X	Raphid-pennate	Achnanthes	Achnanthes_sp.	0	0	0	0	0	0	1	0	0	0	0	0	0	0	0	0	0	0	0	0	16	0	0	0	0	0	0	0	0	0	0	0	0	0	0	0	0	0	0	0	0	0	0	0
X2130	Bacillariophyta	Bacillariophyta_X	Raphid-pennate	Achnanthes	Achnanthes_sp.	1	0	0	0	0	2	0	3	0	0	0	0	0	11	0	0	0	0	0	3	0	0	1	0	0	0	0	0	0	0	0	0	0	0	0	0	0	0	0	0	0	0	0	0
X255	Bacillariophyta	Bacillariophyta_X	Raphid-pennate	Achnanthes	Achnanthes_sp.	0	6	15	0	0	0	93	0	0	0	0	0	0	0	0	0	0	0	0	1	497	0	5	0	0	10	0	0	7	0	5	0	0	0	0	0	0	0	0	0	0	0	0	0
X2382	Phyllopharyngea	Suctoria	Acinetidae_2	Acineta_1	Acineta_1_sp.	0	0	0	0	0	12	0	0	0	0	0	0	0	0	0	0	0	0	0	0	0	0	0	0	0	0	0	1	0	0	0	0	0	0	0	0	0	0	0	0	0	0	0	0
X1805	Ascomycota	Pezizomycotina	Sordariomycetes	Acremonium	Acremonium_sclerotigenum	0	0	0	0	0	0	0	0	0	0	0	0	0	0	0	0	0	0	0	0	0	0	0	0	0	0	0	0	0	0	0	0	0	0	0	0	0	0	0	0	0	0	0	0
X1491	Ulvophyceae	Ulvales-relatives	Ulvales-relatives_X	Acrochaete	Acrochaete_leptochaete	0	0	0	0	1	0	0	0	0	0	0	0	0	0	0	1	0	0	1	2	0	0	0	0	0	0	0	0	0	0	0	0	0	0	0	0	0	0	0	0	0	0	0	0
X2039	Ulvophyceae	Ulvales-relatives	Ulvales-relatives_X	Acrochaete	Acrochaete_leptochaete	0	0	0	0	0	0	1	0	0	0	0	0	0	0	0	0	0	0	0	0	0	0	0	0	0	0	0	0	0	0	0	0	0	0	0	0	0	0	0	0	0	0	0	0
X2222	Ulvophyceae	Ulvales-relatives	Ulvales-relatives_X	Acrochaete	Acrochaete_leptochaete	1	0	0	0	4	0	0	0	0	0	0	0	0	0	0	0	0	0	0	3	0	0	0	0	0	0	0	0	0	0	0	0	0	0	0	0	0	0	0	0	0	0	0	0
X2909	Florideophyceae	Acrochaetiales	Acrochaetiales_X	Acrochaetiales_XX	Acrochaetiales_XX_sp.	0	0	0	0	1	0	0	0	0	0	0	0	0	0	0	0	0	0	0	0	0	0	0	0	0	0	0	0	0	0	0	0	0	0	0	0	0	0	0	0	0	0	0	0
X1943	Bacillariophyta	Bacillariophyta_X	Radial-centric-basal-Coscinodiscophyceae	Actinocyclus	Actinocyclus_curvatulus	15	0	0	0	0	0	0	0	0	0	4	0	1	0	0	15	0	3	0	1	0	0	0	0	0	0	1	0	0	0	1	0	0	0	0	0	0	0	0	0	0	0	0	0
X421	Bacillariophyta	Bacillariophyta_X	Radial-centric-basal-Coscinodiscophyceae	Actinocyclus	Actinocyclus_sp.	0	43	15	24	37	26	32	106	79	58	70	21	5	197	54	87	27	6	39	39	0	25	115	43	26	2	41	5	5	23	5	2	13	7	6	34	4	5	4	0	2	1	2	3
X1592	Bacillariophyta	Bacillariophyta_X	Radial-centric-basal-Coscinodiscophyceae	Actinoptychus	Actinoptychus_sp.	15	5	1	1	3	2	12	0	3	6	1	0	1	14	9	0	0	0	0	0	0	0	9	0	0	0	0	0	0	0	0	0	0	1	0	5	0	0	0	0	0	1	0	3
X845	Bacillariophyta	Bacillariophyta_X	Radial-centric-basal-Coscinodiscophyceae	Actinoptychus	Actinoptychus_splendens	12	11	6	2	0	8	9	32	20	1	0	2	0	0	0	0	0	0	3	5	0	0	3	0	0	0	0	0	1	0	1	0	0	0	0	0	0	0	0	0	0	0	0	4
X2451	Bacillariophyta	Bacillariophyta_X	Radial-centric-basal-Coscinodiscophyceae	Actinoptychus	Actinoptychus_undulatus	0	4	0	0	0	0	6	12	4	2	1	0	0	3	2	0	0	0	1	0	0	0	0	2	0	0	0	1	0	0	0	0	0	0	0	1	0	0	0	0	0	0	0	0
X250	Bacillariophyta	Bacillariophyta_X	Radial-centric-basal-Coscinodiscophyceae	Actinoptychus	Actinoptychus_undulatus	45	165	148	50	40	87	212	539	283	166	113	25	14	386	223	74	1	2	59	31	4	19	72	3	4	0	11	2	10	6	1	2	4	14	3	13	1	0	2	0	0	1	0	1
X4172	Rotifera	Rotifera_X	Rotifera_XX	Adineta	Adineta_vaga	5	0	0	0	0	0	0	0	0	0	0	0	0	0	0	0	0	0	0	0	0	0	0	0	0	0	0	0	0	0	0	0	0	0	0	0	0	0	0	0	0	0	0	0
X2488	Cnidaria	Cnidaria_X	Hydrozoa	Aglaura	Aglaura_hemistoma	36	0	0	0	0	0	0	0	0	0	0	0	0	6	0	0	0	0	0	0	0	0	0	0	0	0	0	0	0	0	0	0	0	0	0	0	1	0	0	0	0	0	0	0
X354	Cnidaria	Cnidaria_X	Hydrozoa	Aglaura	Aglaura_hemistoma	0	0	0	0	0	1	0	0	0	0	0	0	0	0	0	0	0	0	0	0	0	0	0	0	0	0	0	0	0	0	0	0	0	0	0	0	0	0	0	0	0	0	0	0
X778	Cnidaria	Cnidaria_X	Anthozoa	Alaskagorgia	Alaskagorgia_aleutiana	7	3	0	0	2	1	5	104	6	3	1	0	0	0	0	0	0	0	1	0	0	0	1	0	0	0	0	0	0	0	0	0	0	0	0	0	0	0	0	0	0	0	0	0
X1747	Bryozoa	Bryozoa_X	Bryozoa_XX	Alcyonidium	Alcyonidium_mamillatum	5	0	0	0	0	0	0	0	0	0	0	0	0	0	0	0	0	0	0	0	0	0	0	0	0	0	0	0	0	0	0	0	0	0	0	0	0	0	0	0	0	0	0	0
X703	Dinophyceae	Gonyaulacales	Goniodomataceae	Alexandrium	Alexandrium_hiranoi	0	335	0	0	0	0	0	0	0	0	0	0	0	0	0	0	0	0	0	0	0	0	0	0	0	0	0	0	0	0	0	0	0	35	0	0	0	0	0	0	0	0	0	0
X606	Dinophyceae	Gonyaulacales	Goniodomataceae	Alexandrium	Alexandrium_ostenfeldii	0	0	0	0	1	0	0	0	0	0	0	2	0	0	0	0	1	4	0	0	0	0	7	39	17	0	0	0	7	12	22	0	0	0	0	0	1	2	2	0	8	0	0	0
X1460	Dinophyceae	Gonyaulacales	Goniodomataceae	Alexandrium	Alexandrium_tamutum	0	0	0	0	0	0	0	0	0	0	0	0	0	0	0	0	0	1	0	0	0	0	0	0	0	0	0	0	0	0	0	0	0	0	0	0	0	0	0	0	1	0	0	0
X2761	Prymnesiophyceae	Calcihaptophycidae	Rhabdosphaeraceae	Algirosphaera	Algirosphaera_robusta	0	0	0	0	0	0	0	0	0	0	0	0	0	0	0	0	0	0	0	0	0	0	0	0	0	0	0	0	0	0	0	0	0	0	0	0	0	0	0	0	0	0	0	0
X2797	Apusomonadidae_Group-1	Apusomonadidae_Group-1_X	Apusomonadidae_Group-1_XX	Amastigomonas	Amastigomonas_mutabilis	4	2	0	0	0	0	0	0	0	0	0	0	0	0	0	1	0	0	0	0	0	0	0	0	0	0	0	0	0	0	0	0	0	0	0	0	0	0	0	0	0	0	0	0
X1439	Apusomonadidae_Group-1	Apusomonadidae_Group-1_X	Apusomonadidae_Group-1_XX	Amastigomonas	Amastigomonas_sp.	0	0	0	0	0	0	0	0	0	0	1	0	0	0	0	0	0	0	0	1	0	0	0	0	0	0	0	0	0	0	0	0	0	0	0	0	0	0	0	0	0	0	0	0
X2711	Apusomonadidae_Group-1	Apusomonadidae_Group-1_X	Apusomonadidae_Group-1_XX	Amastigomonas	Amastigomonas_sp.	0	0	0	0	0	0	0	0	0	0	0	0	0	0	0	0	0	0	0	0	0	0	0	0	0	0	0	0	0	0	0	0	0	0	0	0	0	0	0	0	0	0	0	0
X3611	Apusomonadidae_Group-1	Apusomonadidae_Group-1_X	Apusomonadidae_Group-1_XX	Amastigomonas	Amastigomonas_sp.	0	0	0	0	0	0	0	0	0	0	0	0	0	0	0	0	0	0	0	0	0	1	1	0	0	0	0	0	0	0	0	0	0	0	0	0	0	0	0	0	0	0	0	0
X3754	Apusomonadidae_Group-1	Apusomonadidae_Group-1_X	Apusomonadidae_Group-1_XX	Amastigomonas	Amastigomonas_sp.	0	0	0	0	0	0	0	0	0	0	0	0	0	0	0	0	0	0	0	0	0	0	0	0	0	0	0	0	0	0	0	0	0	0	0	0	0	0	0	0	0	0	0	0
X1973	Syndiniales	Dino-Group-II	Dino-Group-II-Clade-4	Amoebophrya	Amoebophrya_sp.	0	2	0	0	0	0	1	0	0	0	0	0	0	0	0	0	0	0	0	0	0	0	0	0	0	0	0	0	0	0	0	0	0	3	0	0	1	0	0	0	1	0	0	0
X1195	Porifera	Porifera_X	Demospongiae	Amphilectus	Amphilectus_fucorum	0	0	0	0	0	0	17	0	0	0	0	0	0	0	0	0	0	0	0	0	0	0	0	0	0	0	0	0	0	0	0	0	0	0	0	0	0	0	0	0	0	0	0	0
X1744	Nemertea	Nemertea_X	Nemertea_XX	Amphiporus	Amphiporus_lactifloreus	0	0	0	0	0	0	0	0	0	0	0	0	0	0	0	0	0	0	0	0	0	0	0	0	0	0	0	0	0	0	0	0	0	0	0	0	0	0	0	0	0	0	0	0
X197	Dinophyceae	Dinophysiales	Amphisoleniaceae	Amphisoleniaceae_X	Amphisoleniaceae_X_sp.	72	0	0	4	0	0	0	0	14	0	2	0	0	0	23	0	0	0	0	0	5	4	0	0	0	0	0	1	0	2	0	0	0	0	0	4	6	5	4	13	235	8	10	48
X2411	Dinophyceae	Dinophysiales	Amphisoleniaceae	Amphisoleniaceae_X	Amphisoleniaceae_X_sp.	0	0	0	0	0	0	0	0	0	0	0	0	0	0	3	0	0	0	1	0	0	0	0	0	0	0	0	0	0	0	0	0	0	0	0	0	0	0	1	0	12	2	1	2
X1575	Bacillariophyta	Bacillariophyta_X	Raphid-pennate	Amphora	Amphora_coffeaeformis	0	0	0	0	0	0	1	0	0	0	0	0	0	0	0	0	0	1	0	0	2	0	0	0	0	0	2	1	2	0	0	0	0	0	0	0	0	0	0	0	0	0	0	0
X2963	Dinophyceae	Gonyaulacales	Gonyaulacaceae	Amylax	Amylax_buxus	0	0	0	0	0	0	0	0	0	0	0	0	0	0	0	0	0	0	0	0	0	0	0	0	0	0	0	0	0	0	0	0	0	0	0	0	0	0	0	2	0	0	0	0
X4065	Oligohymenophorea	Scuticociliatia_2	Scuticociliatia_2_X	Ancistrum	Ancistrum_crassum	0	0	0	0	0	0	0	0	0	0	0	0	0	0	0	0	0	0	0	0	0	0	0	0	0	0	0	0	0	0	0	0	0	0	0	0	0	0	0	0	0	0	0	0
X1037	Planomonadida	Planomonadidae	Planomonadidae_Group-1	Ancyromonas	Ancyromonas_kenti	0	0	0	0	0	1	2	0	0	0	0	0	0	0	0	0	0	0	0	0	0	0	0	0	0	0	0	0	0	0	0	0	0	0	0	0	0	0	0	0	0	0	0	0
X1728	Planomonadida	Planomonadidae	Planomonadidae_Group-1	Ancyromonas	Ancyromonas_kenti	0	0	0	0	0	0	0	0	0	0	0	0	0	0	0	0	0	0	0	0	0	0	0	0	0	0	0	0	0	0	0	0	0	0	0	0	0	0	0	0	0	0	0	0
X120	Dinophyceae	Gymnodiniales	Gymnodiniaceae	Ankistrodinium	Ankistrodinium_semilunatum	90	8	7	3	12	12	6	8	20	25	4	1	0	3	1	0	0	0	0	11	0	1	4	1	2	0	1	0	0	0	0	8	7	3	2	1	7	6	1	1	2	0	0	2
X1616	Arthropoda	Crustacea	Maxillopoda	Anomalocera	Anomalocera_patersoni	0	0	0	0	0	0	0	0	0	0	0	0	0	0	0	0	0	0	0	0	0	0	0	0	0	0	0	0	0	0	0	0	0	0	0	0	0	0	0	0	0	0	0	0
X4026	Spirotrichea	Hypotrichia	Holostichidae	Anteholosticha	Anteholosticha_pulchra	0	0	0	0	0	0	0	0	0	0	0	0	0	0	0	0	0	0	0	0	0	0	0	0	0	0	0	0	0	0	0	0	0	0	0	0	0	0	0	0	0	0	0	0
X2151	Basidiomycota	Agaricomycotina	Agaricomycetes	Antrodia	Antrodia_malicola	0	2	0	0	0	0	0	0	0	0	0	0	0	0	0	0	0	0	0	0	0	0	0	0	0	0	0	0	0	0	0	0	0	0	0	0	0	0	0	0	0	0	0	0
X4196	Ichthyosporea	Ichthyosphonida	Pseudoperkinsidae	Anurofeca	Anurofeca_sp.	0	0	0	0	0	0	0	0	0	0	0	0	0	0	0	0	0	0	0	0	0	0	0	0	0	0	0	0	0	0	0	0	0	0	0	0	0	0	0	0	0	0	0	0
X1268	Trebouxiophyceae	Watanabea-Clade	Watanabea-Clade_X	Apatococcus	Apatococcus_lobatus	36	2	0	0	0	0	4	1	0	0	1	0	0	6	0	1	0	0	1	0	2	0	1	2	0	0	0	0	6	0	0	0	0	0	0	0	0	0	0	0	0	0	0	1
X817	Dictyochophyceae	Dictyochophyceae_X	Pedinellales	Apedinella	Apedinella_radians	0	0	0	0	0	0	0	0	0	0	0	0	0	0	0	0	0	0	0	0	0	0	0	0	0	0	0	0	0	0	0	0	0	0	0	0	0	0	0	0	0	0	0	0
X3278	Annelida	Annelida_X	Annelida_XX	Aphrodita	Aphrodita_sp.	0	0	0	0	0	0	0	5	0	2	0	0	0	0	0	0	0	0	0	0	0	0	0	0	0	0	0	0	0	0	0	0	0	0	0	0	0	0	0	0	0	0	0	0
X3185	Ascomycota	Pezizomycotina	Sordariomycetes	Apiospora	Apiospora_montagnei	0	0	0	0	0	0	0	0	0	0	1	0	0	0	0	0	0	0	0	0	0	0	0	0	0	0	0	0	0	0	0	0	0	0	0	0	0	0	0	0	0	0	0	0
X3419	Embryophyceae	Embryophyceae_X	Embryophyceae_XX	Apium	Apium_graveolens	0	0	0	0	0	0	0	0	0	0	0	0	0	0	0	0	0	0	0	0	0	0	0	0	0	0	0	0	0	0	0	0	0	0	0	0	0	0	0	0	0	0	0	0
X536	Labyrinthulomycetes	Labyrinthulales	Labyrinthulaceae	Aplanochytrium	Aplanochytrium_kerguelense	0	0	0	0	0	0	0	1	0	0	0	0	0	1	0	0	0	0	0	0	0	0	0	0	0	0	0	0	0	0	0	0	1	0	0	0	0	0	0	0	0	0	0	0
X1636	Labyrinthulomycetes	Labyrinthulales	Labyrinthulaceae	Aplanochytrium	Aplanochytrium_sp.	1	2	0	0	0	0	1	1	1	0	0	0	0	0	1	0	0	0	0	0	0	0	0	0	0	0	0	0	0	0	0	0	0	0	0	0	0	0	0	0	1	0	0	0
X1749	Labyrinthulomycetes	Labyrinthulales	Labyrinthulaceae	Aplanochytrium	Aplanochytrium_sp.	0	0	1	0	0	1	0	0	0	0	0	0	0	0	0	0	0	0	0	0	0	0	0	0	0	0	0	0	0	0	0	0	0	0	0	0	0	0	0	0	0	0	0	0
X380	Labyrinthulomycetes	Labyrinthulales	Labyrinthulaceae	Aplanochytrium	Aplanochytrium_sp.	65	36	9	4	12	2	12	86	10	5	3	0	2	41	3	1	2	0	4	1	7	1	10	0	0	0	0	0	0	1	1	2	2	0	0	2	0	0	1	0	0	0	0	0
X3720	Mollusca	Gastropoda	Heterobranchia	Aplysia	Aplysia_californica	0	0	0	0	0	0	0	1	0	0	0	0	0	0	0	0	0	0	0	0	0	0	0	0	0	0	0	0	0	0	0	0	0	0	0	0	0	0	0	0	0	0	0	0
X3229	Apusomonadidae_Group-1	Apusomonadidae_Group-1_X	Apusomonadidae_Group-1_XX	Apusomonadidae_Group-1_XXX	Apusomonadidae_Group-1_XXX_sp.	0	2	0	0	0	0	0	0	0	1	0	0	0	0	0	0	0	0	0	0	0	0	0	0	0	0	0	0	0	0	0	0	0	0	0	0	0	0	0	0	0	0	0	0
X4325	Apusomonadidae_Group-3	Apusomonadidae_Group-3_X	Apusomonadidae_Group-3_XX	Apusomonadidae_Group-3_XXX	Apusomonadidae_Group-3_XXX_sp.	0	0	0	0	0	0	0	0	0	0	0	0	0	0	0	0	0	0	0	0	0	0	0	0	0	0	0	0	0	0	0	0	0	0	0	1	0	0	0	0	0	0	0	0
X1397	Apusomonadidae_Group-1	Apusomonadidae_Group-1_X	Apusomonadidae_Group-1_XX	Apusomonas	Apusomonas_proboscidea	0	0	0	1	0	0	0	0	0	0	1	0	0	0	0	0	0	0	0	2	0	0	3	0	0	0	0	0	0	0	0	0	0	0	0	0	0	0	0	0	0	0	0	0
X2991	Apusomonadidae_Group-1	Apusomonadidae_Group-1_X	Apusomonadidae_Group-1_XX	Apusomonas	Apusomonas_proboscidea	0	0	0	0	0	0	0	0	0	0	0	0	0	0	0	0	0	0	0	0	0	0	0	0	0	0	0	0	0	0	0	0	0	0	0	0	0	0	0	0	0	0	0	0
X3083	Apusomonadidae_Group-1	Apusomonadidae_Group-1_X	Apusomonadidae_Group-1_XX	Apusomonas	Apusomonas_proboscidea	1	1	0	0	0	0	0	0	0	0	0	0	0	0	0	0	0	0	0	0	0	0	0	0	0	0	0	0	0	0	0	0	0	0	0	0	0	0	0	0	0	0	0	0
X710	Apusomonadidae_Group-1	Apusomonadidae_Group-1_X	Apusomonadidae_Group-1_XX	Apusomonas	Apusomonas_proboscidea	1	5	0	0	2	0	0	1	0	0	1	0	0	0	0	0	0	0	0	0	0	0	0	0	0	0	0	0	0	0	0	0	0	0	0	0	0	0	0	0	0	0	0	0
X986	Apusomonadidae_Group-1	Apusomonadidae_Group-1_X	Apusomonadidae_Group-1_XX	Apusomonas	Apusomonas_proboscidea	5	0	0	0	0	0	1	1	1	0	0	0	0	0	0	0	0	0	0	1	0	0	1	0	0	0	0	0	0	0	0	0	0	1	0	0	0	0	0	0	0	0	0	0
X1779	Dinophyceae	Peridiniales	Amphidiniopsidaceae	Archaeperidinium	Archaeperidinium_minutum	0	10	7	0	0	5	0	0	7	0	0	9	0	0	0	0	0	1	0	0	0	0	0	0	0	0	2	0	0	0	0	0	0	0	1	0	0	0	1	1	1	0	0	0
X1822	Platyhelminthes	Turbellaria	Acoelomorpha	Archaphanostoma	Archaphanostoma_macrospiriferum	0	0	0	0	0	0	0	0	0	0	0	0	0	0	0	0	0	0	0	0	0	0	1	0	0	0	0	0	0	0	0	0	0	0	0	0	0	0	0	0	0	0	0	0
X2360	Platyhelminthes	Turbellaria	Acoelomorpha	Archaphanostoma	Archaphanostoma_macrospiriferum	0	0	0	0	0	0	0	0	0	0	0	0	0	0	0	0	0	0	0	0	0	0	0	0	0	0	0	0	0	0	0	0	0	0	0	0	0	0	0	0	0	0	0	0
X2417	Platyhelminthes	Turbellaria	Acoelomorpha	Archaphanostoma	Archaphanostoma_macrospiriferum	0	0	0	0	0	0	0	0	0	0	0	0	0	0	0	0	0	0	0	0	0	0	0	0	0	0	0	0	0	0	0	0	0	0	0	0	0	0	0	0	0	0	0	0
X322	Bacillariophyta	Bacillariophyta_X	Polar-centric-Mediophyceae	Arcocellulus	Arcocellulus_cornucervis	31	10	1	4	10	6	12	13	13	9	2	0	0	20	3	0	0	1	0	9	2	0	3	0	0	0	1	0	0	0	0	0	1	1	0	0	0	0	0	0	0	0	0	0
X2875	Mollusca	Bivalvia	Heteroconchia	Arctica	Arctica_islandica	0	0	0	0	0	1	0	0	0	0	0	0	0	0	0	0	0	0	0	0	0	0	0	0	0	0	0	0	0	0	0	0	0	0	0	0	0	0	0	0	0	0	0	0
X3953	Annelida	Annelida_X	Annelida_XX	Arenicola	Arenicola_marina	2	0	0	0	0	0	0	0	0	0	0	0	0	0	0	0	0	0	0	0	0	0	0	0	0	0	0	0	0	0	0	0	0	0	0	0	0	0	0	0	0	0	0	0
X160	Ascomycota	Pezizomycotina	Leotiomycetes	Articulospora	Articulospora_tetracladia	188	15	1	0	2	1	20	2	2	0	22	0	2	30	4	0	0	0	0	3	36	0	24	107	0	1	25	0	16	0	0	1	1	3	0	0	0	0	8	0	0	12	0	0
X1559	Urochordata	Urochordata_X	Ascidiacea	Ascidia	Ascidia_zara	0	0	0	0	0	0	0	0	0	0	0	0	0	0	0	0	0	0	0	0	0	0	0	0	0	0	0	0	0	0	0	0	0	0	0	0	0	0	0	0	0	0	0	0
X3556	Urochordata	Urochordata_X	Ascidiacea	Ascidiacea_X	Ascidiacea_X_sp.	0	0	0	0	0	0	0	0	0	0	0	0	0	0	0	0	0	0	0	0	0	0	0	0	0	0	0	0	0	0	0	0	1	0	0	0	0	0	0	0	0	0	0	0
X1205	CONThreeP	CONThreeP_X	CONThreeP_XX	Askenasia	Askenasia_sp.	0	0	0	0	0	0	0	0	0	0	0	0	0	0	0	0	0	0	0	0	0	0	0	0	0	0	0	0	0	0	2	0	0	0	0	3	2	1	0	0	0	0	0	1
X1473	CONThreeP	CONThreeP_X	CONThreeP_XX	Askenasia	Askenasia_sp.	0	0	0	0	0	0	0	0	0	0	0	0	0	0	0	0	0	0	0	0	0	0	0	0	0	0	0	0	0	0	0	0	0	0	0	0	0	0	0	0	0	0	0	0
X1912	CONThreeP	CONThreeP_X	CONThreeP_XX	Askenasia	Askenasia_sp.	0	0	0	0	0	0	0	0	0	0	0	0	0	0	0	0	0	0	0	1	0	0	0	0	0	0	0	0	0	0	0	0	0	0	0	0	0	0	0	0	0	0	0	0
X2188	CONThreeP	CONThreeP_X	CONThreeP_XX	Askenasia	Askenasia_sp.	0	0	0	0	0	0	0	0	0	0	0	0	0	0	0	0	0	0	0	0	0	0	0	0	0	0	0	0	0	0	0	0	0	0	0	0	0	0	0	0	0	0	0	0
X3132	CONThreeP	CONThreeP_X	CONThreeP_XX	Askenasia	Askenasia_sp.	2	0	0	0	1	0	0	0	0	0	0	0	0	0	0	0	0	0	0	0	0	0	0	0	0	0	0	0	0	0	0	0	0	0	0	0	0	0	0	0	0	0	0	0
X3901	CONThreeP	CONThreeP_X	CONThreeP_XX	Askenasia	Askenasia_sp.	0	0	0	0	0	0	0	0	0	0	0	0	0	0	0	0	0	0	0	0	0	0	0	0	0	0	0	0	0	0	0	0	0	0	0	0	0	0	0	0	0	0	0	0
X658	CONThreeP	CONThreeP_X	CONThreeP_XX	Askenasia	Askenasia_sp.	26	8	2	5	39	3	5	5	11	8	1	0	0	8	1	0	0	0	0	0	0	0	0	0	0	0	0	0	0	0	0	0	0	0	0	0	0	0	0	0	0	0	0	0
X1606	Spirotrichea	Euplotia	Aspidiscidae	Aspidisca	Aspidisca_steini	1	1	0	1	2	0	0	1	0	0	1	0	0	0	0	0	0	0	0	0	0	0	0	0	0	0	0	0	0	0	0	0	0	0	0	4	0	0	1	0	1	0	0	0
X1385	Filosa-Imbricatea	Euglyphida	Euglyphidae	Assulina	Assulina_muscorum	17	6	1	0	3	0	0	0	0	0	0	0	2	6	0	0	0	0	0	0	0	0	1	0	0	0	0	0	0	0	0	0	0	0	0	0	0	0	0	0	0	0	0	0
X3171	Filosa-Imbricatea	Euglyphida	Euglyphidae	Assulina	Assulina_muscorum	0	0	0	0	0	0	0	0	0	0	0	0	0	0	0	0	0	0	0	0	0	0	0	0	0	0	0	0	0	0	0	0	0	0	0	0	0	0	0	0	0	0	0	0
X3683	Filosa-Imbricatea	Euglyphida	Euglyphidae	Assulina	Assulina_muscorum	0	0	0	0	0	0	0	0	0	0	0	0	0	0	0	0	0	0	0	0	0	0	0	0	0	0	0	0	0	0	0	0	0	0	0	0	0	0	0	0	0	0	0	0
X748	Filosa-Imbricatea	Euglyphida	Euglyphidae	Assulina	Assulina_muscorum	17	4	2	6	15	7	4	19	15	10	0	0	0	1	0	0	0	0	0	0	0	0	0	0	0	0	0	1	0	0	0	0	0	0	0	0	0	0	0	0	0	0	0	0
X1076	Echinodermata	Echinodermata_X	Echinodermata_XX	Asterias	Asterias_forbesi	0	121	5	0	0	0	0	0	1	0	0	2	0	0	0	0	0	0	0	1	0	7	0	0	1	14	0	0	0	0	0	0	0	0	0	0	0	0	0	0	0	0	0	0
X17	Echinodermata	Echinodermata_X	Echinodermata_XX	Asterias	Asterias_forbesi	154	13585	1322	71	99	53	12	3967	2037	803	3	60	50	1325	1	2	45	48	275	602	6	1622	44	5	135	5770	4	4	10	93	0	119	17	152	7	6	1	5	2	16	198	2	7	1
X1813	Echinodermata	Echinodermata_X	Echinodermata_XX	Asterias	Asterias_forbesi	0	2	15	0	0	2	0	3	1	0	0	0	0	0	0	0	0	0	0	0	0	0	0	0	0	0	0	0	0	0	0	0	0	0	0	0	0	0	0	0	0	0	0	0
X1841	Echinodermata	Echinodermata_X	Echinodermata_XX	Asterias	Asterias_forbesi	0	1	5	3	0	1	0	2	0	0	0	0	0	0	0	0	0	0	0	0	0	0	0	0	0	1	0	0	0	0	0	0	0	0	0	0	0	0	0	0	0	0	0	0
X2387	Echinodermata	Echinodermata_X	Echinodermata_XX	Asterias	Asterias_forbesi	0	0	0	1	0	0	0	0	0	0	0	1	0	0	0	0	0	0	0	0	0	0	0	0	0	0	0	0	0	0	0	2	0	1	0	0	0	0	0	0	0	0	0	0
X2840	Echinodermata	Echinodermata_X	Echinodermata_XX	Asterias	Asterias_forbesi	0	1	0	0	0	0	0	2	0	0	0	0	0	0	0	0	0	0	0	0	0	0	0	0	0	0	0	0	0	0	0	0	0	0	0	0	0	0	0	0	0	0	0	0
X1529	Bacillariophyta	Bacillariophyta_X	Araphid-pennate	Asterionella	Asterionella_japonica	0	0	0	0	0	0	0	0	0	0	0	0	0	0	0	0	1	0	2	0	0	0	0	0	0	0	0	0	0	0	0	0	0	0	0	2	0	0	0	0	0	0	0	0
X2627	Bacillariophyta	Bacillariophyta_X	Araphid-pennate	Asterionella	Asterionella_japonica	0	0	0	0	0	0	0	0	0	0	0	0	0	0	0	0	0	0	0	0	0	0	0	0	0	0	0	0	0	0	0	0	0	0	0	0	0	0	0	0	0	0	0	0
X481	Bacillariophyta	Bacillariophyta_X	Araphid-pennate	Asterionellopsis	Asterionellopsis_glacialis	2	2	3	1	1	3	4	42	10	7	3	3	0	20	6	2	1	0	9	2	0	1	5	3	1	2	1	1	1	1	0	2	2	0	0	6	0	0	0	0	0	0	1	1
X2580	Trebouxiophyceae	Microthamniales	Microthamniales_X	Asterochloris	Asterochloris_phycobiontica	0	0	0	0	0	0	0	0	0	0	0	0	0	26	0	0	0	0	0	0	0	0	0	0	0	0	0	0	0	0	0	0	0	0	0	0	0	0	0	0	0	0	0	0
X635	Bacillariophyta	Bacillariophyta_X	Araphid-pennate	Asteroplanus	Asteroplanus_karianus	0	5	6	1	4	3	3	9	4	8	2	0	1	15	4	0	1	0	4	4	1	1	2	0	0	1	1	2	1	0	1	2	3	5	3	5	0	0	0	0	0	0	0	0
X807	Echinodermata	Echinodermata_X	Echinodermata_XX	Astropecten	Astropecten_articulatus	0	0	0	0	0	0	0	0	0	0	0	0	0	0	0	0	0	0	0	0	0	0	0	0	0	0	0	0	0	0	0	0	0	0	0	0	0	0	0	0	54	0	0	0
X3577	Bacillariophyta	Bacillariophyta_X	Polar-centric-Mediophyceae	Attheya	Attheya_sp.	0	0	0	0	0	0	0	0	0	0	0	0	0	0	0	0	0	0	0	0	0	0	0	0	0	0	0	0	0	0	0	0	0	0	0	0	0	0	0	0	0	0	0	0
X3934	Arthropoda	Crustacea	Maxillopoda	Attheyella	Attheyella_crassa	0	0	0	0	0	0	0	0	0	0	0	0	0	0	0	0	0	0	0	0	0	0	0	0	0	0	0	0	0	0	0	0	0	0	0	0	0	0	0	0	0	0	0	0
X2810	Filosa-Imbricatea	Marimonadida	Marimonadida_X	Auranticordis	Auranticordis_quadriverberis	0	0	0	0	0	0	0	0	0	0	0	0	0	3	0	0	0	0	0	0	0	0	0	0	0	0	0	0	0	0	0	0	0	0	0	0	0	0	0	0	0	0	0	0
X3358	Filosa-Imbricatea	Marimonadida	Marimonadida_X	Auranticordis	Auranticordis_quadriverberis	0	0	0	0	0	0	0	0	0	0	0	0	0	0	0	0	0	0	0	0	0	0	0	0	0	0	0	0	0	0	0	0	0	0	0	0	0	0	0	0	0	0	0	0
X4187	Filosa-Imbricatea	Marimonadida	Marimonadida_X	Auranticordis	Auranticordis_quadriverberis	0	0	0	0	0	0	0	0	0	0	0	0	0	0	0	0	0	0	0	0	0	0	0	0	0	0	0	0	0	0	0	0	0	0	0	0	0	0	0	0	0	0	0	0
X1109	Labyrinthulomycetes	Thraustochytriales	Thraustochytriaceae	Aurantiochytrium	Aurantiochytrium_sp.	0	0	1	0	0	0	0	1	1	0	0	0	0	7	0	0	0	0	0	0	0	0	0	0	0	0	0	0	0	0	0	0	0	0	0	0	0	0	0	0	0	0	0	0
X1955	Labyrinthulomycetes	Thraustochytriales	Thraustochytriaceae	Aurantiochytrium	Aurantiochytrium_sp.	0	0	0	0	0	1	0	0	3	0	0	0	0	16	0	0	0	0	0	1	0	0	0	0	0	0	0	0	0	0	0	0	0	0	0	0	0	0	1	0	0	0	0	0
X2226	Labyrinthulomycetes	Thraustochytriales	Thraustochytriaceae	Aurantiochytrium	Aurantiochytrium_sp.	0	0	0	0	0	0	0	0	0	0	0	0	0	6	0	0	0	0	0	0	0	0	0	0	0	0	0	0	0	0	0	0	0	0	0	0	0	0	0	0	0	0	0	0
X1865	Cnidaria	Cnidaria_X	Scyphozoa	Aurelia	Aurelia_aurita	0	0	0	0	0	0	0	0	0	0	0	0	0	0	0	0	0	0	0	0	0	0	0	0	0	1	0	0	0	0	0	0	0	0	0	0	0	0	0	0	0	0	0	0
X3906	Basidiomycota	Agaricomycotina	Agaricomycetes	Auricularia	Auricularia_polytricha	4	0	0	0	0	0	0	0	0	0	0	0	0	0	0	0	0	0	0	0	0	0	0	0	0	0	0	0	0	0	0	0	0	0	0	0	0	0	0	0	0	0	0	0
X1114	Annelida	Annelida_X	Annelida_XX	Aurospio	Aurospio_dibranchiata	0	0	0	0	3	0	0	2	0	0	0	0	0	0	0	0	0	0	0	0	0	0	0	0	0	0	0	0	0	0	0	0	0	0	0	0	0	0	0	0	0	1	0	0
X233	Annelida	Annelida_X	Annelida_XX	Aurospio	Aurospio_dibranchiata	0	0	1	0	1	0	0	0	0	0	1	0	224	90	3	0	0	0	1	1	123	0	1	1	0	0	234	0	0	1	0	0	0	0	4	0	0	516	0	0	0	0	1	1
X3462	Trebouxiophyceae	Chlorellales	Chlorellales_X	Auxenochlorella	Auxenochlorella_protothecoides	0	0	0	0	0	0	0	0	0	0	0	0	0	0	0	0	0	0	0	0	1	0	1	0	0	0	0	0	0	0	0	0	0	0	0	0	0	0	0	0	0	0	0	0
X1420	Craniata	Craniata_X	Teleostei	Auxis	Auxis_rochei	5	0	0	0	11	1	2	0	2	4	0	0	0	2	1	1	0	0	0	0	0	0	0	0	0	0	0	0	0	0	0	0	0	0	0	0	0	0	0	0	0	0	0	0
X769	Craniata	Craniata_X	Teleostei	Auxis	Auxis_rochei	50	7	2	0	0	0	1	0	2	1	0	0	0	0	0	0	0	0	0	0	0	0	0	0	0	0	0	0	0	0	1	0	0	0	0	0	0	0	0	0	0	0	0	0
X957	Craniata	Craniata_X	Teleostei	Auxis	Auxis_rochei	9	1	0	0	5	1	20	1	1	0	1	0	0	1	0	0	0	0	0	0	0	0	0	0	0	0	0	0	0	0	0	0	0	0	0	0	0	0	0	0	0	0	0	5
X1915	Bacillariophyta	Bacillariophyta_X	Raphid-pennate	Bacillaria	Bacillaria_paxillifer	1	0	0	1	0	1	15	5	1	3	0	0	1	4	1	0	0	0	1	0	0	0	21	0	0	0	0	1	0	1	0	0	0	0	0	0	0	0	0	0	0	0	0	0
X2536	Bacillariophyta	Bacillariophyta_X	Polar-centric-Mediophyceae	Bacteriastrum	Bacteriastrum_hyalinum	0	5	0	0	8	0	0	0	0	3	0	0	0	13	1	0	0	0	0	0	0	0	0	0	0	0	0	0	0	0	0	0	0	0	0	0	0	0	0	0	0	0	0	0
X816	Hemichordata	Hemichordata_X	Hemichordata_XX	Balanoglossus	Balanoglossus_sp.	14	0	0	1	0	0	0	4	0	0	2	0	0	0	0	0	0	0	0	0	0	0	0	0	0	0	0	0	0	0	0	0	0	0	0	0	0	0	0	0	0	0	1	0
X1046	Entoprocta	Entoprocta_X	Entoprocta_XX	Barentsia	Barentsia_gracilis	0	0	0	0	0	0	0	0	0	0	0	0	0	0	0	0	0	0	0	0	0	0	0	0	0	0	0	0	0	1	0	0	0	0	1	0	0	0	0	0	0	0	0	0
X2405	Mollusca	Bivalvia	Heteroconchia	Barnea	Barnea_candida	0	0	0	0	0	0	0	0	0	0	0	0	0	0	0	0	0	0	0	0	0	0	0	0	0	0	0	0	0	0	0	0	0	0	0	0	0	0	0	0	0	0	0	0
X59	Mamiellophyceae	Mamiellales	Bathycoccaceae	Bathycoccus	Bathycoccus_prasinos	623	262	9	120	601	285	287	115	323	154	82	0	0	96	4	0	0	0	1	34	6	1	22	0	0	1	0	0	0	2	0	4	13	30	6	1	0	0	1	0	0	0	0	0
X582	Basidiomycota	Pucciniomycotina	Agaricostilbomycetes	Bensingtonia	Bensingtonia_yuccicola	26	13	1	1	0	0	6	1	3	0	1	0	0	0	0	0	0	0	0	0	4	0	8	1	0	0	0	0	2	0	0	0	0	0	0	0	0	0	0	0	0	0	0	0
X1291	Bacillariophyta	Bacillariophyta_X	Raphid-pennate	Berkeleya	Berkeleya_rutilans	0	0	0	0	0	0	1	0	0	0	0	0	0	0	0	0	0	0	0	0	2	0	0	0	0	0	0	0	0	0	0	0	0	1	0	0	0	0	0	0	0	0	0	0
X734	Ctenophora	Ctenophora_X	Ctenophora_XX	Beroe	Beroe_cucumis	0	0	0	0	0	0	0	0	0	0	0	0	0	0	0	0	0	0	0	0	0	0	0	0	0	0	0	0	0	0	0	0	0	0	0	0	0	0	0	0	0	0	0	0
X902	Ctenophora	Ctenophora_X	Ctenophora_XX	Beroe	Beroe_cucumis	0	0	0	0	0	0	0	0	1	0	0	0	0	0	0	0	0	0	0	0	0	0	0	0	0	0	0	0	0	0	0	0	0	0	0	0	0	0	0	0	0	0	0	0
X1993	Bicoecea	Bicoecales	Bicoecaceae	Bicoecaceae_X	Bicoecaceae_X_sp.	0	1	0	0	0	0	0	0	0	0	0	0	0	0	0	0	0	0	0	0	0	0	0	0	0	0	0	0	0	0	0	0	1	0	0	0	0	0	0	0	0	0	0	0
X3700	Bicoecea	Bicoecales	Bicoecaceae	Bicoecaceae_X	Bicoecaceae_X_sp.	0	0	0	0	0	0	0	0	0	0	0	0	0	0	0	0	0	0	0	0	0	0	0	0	0	0	0	0	0	0	0	0	0	0	0	0	0	0	0	0	0	0	0	0
X2607	Bicoecea	Bicoecales	Bicoecaceae	Bicosoeca	Bicosoeca_sp.	0	0	0	0	0	0	0	0	0	0	0	0	0	5	0	0	0	0	0	0	0	0	0	0	0	0	0	0	0	0	0	0	0	0	0	0	0	0	0	0	0	0	0	0
X2897	Bicoecea	Bicoecales	Bicoecaceae	Bicosoeca	Bicosoeca_sp.	0	0	0	0	0	0	0	0	0	0	0	0	0	0	0	0	0	0	0	0	0	0	0	0	0	0	0	0	0	0	0	0	0	0	0	0	0	0	0	0	0	0	0	0
X3381	Bicoecea	Bicoecales	Bicoecaceae	Bicosoeca	Bicosoeca_sp.	0	0	0	0	1	0	0	0	0	0	0	0	0	0	0	0	0	0	0	0	0	0	0	0	0	0	0	0	0	0	0	0	0	0	0	0	0	0	0	0	0	0	0	0
X3399	Bacillariophyta	Bacillariophyta_X	Polar-centric-Mediophyceae	Biddulphia	Biddulphia_alternans	0	0	0	0	0	0	3	0	0	0	0	0	0	0	0	0	0	0	0	0	0	0	4	0	0	0	0	0	0	0	0	0	0	0	0	0	0	0	0	0	0	0	0	0
X116	Dinophyceae	Suessiales	Suessiaceae	Biecheleria	Biecheleria_sp.	140	32	32	6	51	10	25	94	37	24	8	0	4	77	14	7	2	0	15	12	8	3	6	10	0	0	3	3	1	0	0	1	1	0	0	3	1	5	4	2	21	2	9	2
X256	Dinophyceae	Suessiales	Suessiaceae	Biecheleria	Biecheleria_sp.	25	5	5	2	11	5	3	25	12	10	1	0	4	1	3	1	2	0	0	2	1	0	3	2	0	0	0	0	1	0	0	0	0	0	0	0	0	0	0	0	2	0	0	0
X1527	Ascomycota	Pezizomycotina	Dothideomycetes	Bipolaris	Bipolaris_sp.	0	1	0	0	0	0	15	0	0	0	0	0	0	0	24	0	0	0	0	0	0	0	0	0	0	0	0	0	0	0	0	0	0	0	0	0	0	0	0	0	0	0	0	0
X2422	Ascomycota	Pezizomycotina	Dothideomycetes	Bipolaris	Bipolaris_sp.	3	1	0	0	0	0	1	0	0	0	0	0	0	0	0	0	0	0	0	0	2	0	2	0	0	0	0	0	0	0	0	0	0	0	0	0	0	0	0	0	0	0	0	0
X1941	Basidiomycota	Agaricomycotina	Agaricomycetes	Bjerkandera	Bjerkandera_sp.	0	4	0	3	0	0	1	0	1	0	0	0	0	0	0	0	0	0	0	0	0	0	0	0	0	0	0	0	0	0	0	0	0	0	0	0	0	0	0	0	0	0	0	0
X1815	Ulvophyceae	Ulvales-relatives	Ulvales-relatives_X	Blidingia	Blidingia_dawsonii	1	0	0	0	2	0	1	0	1	0	0	0	0	0	0	0	0	0	0	2	0	0	7	0	0	1	0	0	0	0	0	0	0	0	0	0	0	0	0	0	0	0	0	0
X1429	Annelida	Annelida_X	Annelida_XX	Boccardia	Boccardia_proboscidea	0	0	0	0	0	0	1	0	0	0	0	0	0	0	0	0	0	0	0	0	0	0	0	0	0	0	0	0	0	70	0	0	0	0	0	0	0	0	0	0	0	0	0	0
X3232	Euglenozoa	Kinetoplastida	Bodonidae	Bodo	Bodo_saltans	0	0	0	0	0	0	1	0	0	0	0	0	0	0	0	0	0	0	0	1	0	0	0	0	0	0	0	0	0	0	0	0	0	0	0	0	0	0	0	0	0	0	0	0
X3224	Euglenozoa	Kinetoplastida	Bodonidae	Bodonidae_X	Bodonidae_X_sp.	0	0	0	0	1	0	0	0	0	0	0	0	0	0	0	0	0	0	0	0	0	0	0	0	0	0	0	0	0	0	0	0	0	0	0	0	0	0	0	0	0	0	0	0
X2121	Dinophyceae	Suessiales	Borghiellaceae	Borghiella	Borghiella_tenuissima	0	0	0	0	0	0	0	0	0	0	0	0	0	0	0	0	0	0	0	0	0	0	0	0	0	0	0	0	0	0	0	0	0	0	0	0	0	0	0	0	0	0	0	0
X1720	Bicoecea	Borokales	Borokaceae	Borokaceae_X	Borokaceae_X_sp.	0	7	0	0	0	0	3	0	0	0	0	0	0	3	0	0	0	0	0	0	0	0	0	0	1	0	0	0	0	0	0	0	0	0	0	0	0	0	0	0	0	0	0	0
X1786	Bicoecea	Borokales	Borokaceae	Borokaceae_X	Borokaceae_X_sp.	0	0	0	0	0	0	0	0	0	0	0	0	0	0	0	0	0	0	0	0	0	0	0	0	0	0	0	0	0	0	0	0	0	0	0	0	0	0	0	0	0	0	0	0
X3101	Xanthophyceae	Xanthophyceae_X	Xanthophyceae_XX	Botryidiopsidaceae	Botryidiopsidaceae_sp.	0	0	0	0	0	0	0	0	0	0	0	0	0	19	0	0	0	0	0	0	0	0	0	0	0	0	0	0	0	0	0	0	0	0	0	0	0	0	0	0	0	0	0	0
X1462	Filosa-Thecofilosea	Ebriida	Botuliformidae	Botuliforma	Botuliforma_benthica	1	2	0	0	0	0	0	0	3	3	0	0	0	0	1	0	0	0	2	0	0	0	0	1	0	0	0	0	1	0	0	0	3	1	0	0	0	0	1	0	1	0	0	0
X1699	Filosa-Thecofilosea	Ebriida	Botuliformidae	Botuliforma	Botuliforma_benthica	0	0	0	0	0	0	0	0	0	0	0	0	0	0	0	0	0	0	0	0	0	0	0	0	0	0	0	0	0	0	0	0	0	0	0	0	0	0	0	0	0	0	0	0
X1976	Filosa-Thecofilosea	Ebriida	Botuliformidae	Botuliforma	Botuliforma_benthica	1	1	0	0	0	2	0	1	0	0	1	0	0	0	0	0	0	0	0	0	0	0	0	1	0	0	0	1	0	0	1	0	3	0	1	0	1	0	0	0	0	0	0	0
X2268	Filosa-Thecofilosea	Ebriida	Botuliformidae	Botuliforma	Botuliforma_benthica	0	0	1	1	0	0	0	0	1	0	0	0	0	0	0	0	0	0	0	0	0	0	0	1	0	0	0	0	0	1	0	1	2	0	0	0	1	1	0	0	0	1	1	1
X2421	Filosa-Thecofilosea	Ebriida	Botuliformidae	Botuliforma	Botuliforma_benthica	2	1	2	0	0	2	0	0	0	0	0	0	0	0	0	0	0	0	0	0	0	0	0	0	0	0	0	0	0	0	0	0	0	0	0	0	0	0	0	0	0	0	0	0
X2782	Filosa-Thecofilosea	Ebriida	Botuliformidae	Botuliforma	Botuliforma_benthica	0	0	0	1	0	0	0	0	0	0	0	2	0	0	1	0	0	0	2	0	0	0	0	0	0	0	0	0	0	0	0	1	2	1	0	0	0	1	0	0	0	0	0	0
X2879	Filosa-Thecofilosea	Ebriida	Botuliformidae	Botuliforma	Botuliforma_benthica	0	0	0	0	0	0	0	0	0	0	0	0	0	0	0	0	0	0	0	1	0	0	0	0	0	0	0	0	0	0	0	0	0	0	0	0	0	0	0	0	0	0	0	0
X349	Filosa-Thecofilosea	Ebriida	Botuliformidae	Botuliforma	Botuliforma_benthica	21	5	6	3	2	2	12	9	11	7	0	3	0	8	1	4	1	1	13	9	0	6	7	12	3	4	13	14	5	9	1	21	33	16	13	29	8	11	2	2	6	1	2	13
X4119	Filosa-Thecofilosea	Ebriida	Botuliformidae	Botuliforma	Botuliforma_benthica	0	0	0	0	0	0	0	0	0	0	0	0	0	0	0	0	0	0	0	0	0	0	0	0	0	0	0	0	0	0	0	0	0	0	1	2	0	0	0	0	0	0	0	0
X559	Filosa-Thecofilosea	Ebriida	Botuliformidae	Botuliforma	Botuliforma_benthica	4	2	0	1	1	0	1	3	4	5	0	0	0	2	1	0	0	0	3	10	0	0	1	0	0	0	0	0	0	0	0	1	1	1	0	1	0	2	1	0	0	0	0	0
X713	Filosa-Thecofilosea	Ebriida	Botuliformidae	Botuliforma	Botuliforma_benthica	25	21	31	8	5	5	12	37	13	15	6	1	5	17	5	0	0	0	8	1	0	0	5	2	0	0	0	1	0	1	0	3	8	3	5	2	0	1	0	0	0	0	1	1
X1387	Cnidaria	Cnidaria_X	Hydrozoa	Bougainvillia	Bougainvillia_sp.	0	0	0	0	0	0	0	0	0	0	0	0	0	0	0	0	0	0	1	0	0	0	0	0	0	0	1	0	0	0	0	0	0	0	0	0	0	0	0	0	0	0	0	0
X1963	Ascomycota	Pezizomycotina	Leotiomycetes	Brachyalara	Brachyalara_straminea	0	0	0	0	0	0	1	0	0	0	6	1	0	0	0	0	0	0	0	0	7	0	3	6	0	0	0	0	0	0	0	0	0	0	0	0	0	0	0	0	0	0	0	0
X2714	Ascomycota	Pezizomycotina	Leotiomycetes	Brachyalara	Brachyalara_straminea	0	0	0	0	0	0	0	0	0	0	0	0	0	0	0	0	0	0	0	0	0	0	0	0	0	0	0	0	0	0	0	0	0	0	0	0	0	0	0	0	0	0	0	0
X1957	Embryophyceae	Embryophyceae_X	Embryophyceae_XX	Brachypodium	Brachypodium_distachyon	0	0	0	0	3	0	0	0	0	0	0	0	0	0	0	0	0	0	0	0	0	0	0	0	0	0	0	0	0	0	0	0	0	0	0	0	0	0	0	0	0	0	0	0
X4176	Cephalochordata	Cephalochordata_X	Cephalochordata_XX	Branchiostoma	Branchiostoma_floridae	0	3	0	0	0	0	0	0	0	0	0	0	0	0	0	0	0	0	0	0	0	0	0	0	0	0	0	0	0	0	0	0	0	0	0	0	0	0	0	0	0	0	0	0
X3388	Breviatea_X	Breviatea_XX	Breviatea_XXX	Breviatea_XXXX	Breviatea_XXXX_sp.	0	1	0	0	0	0	0	1	0	0	0	0	0	0	0	0	0	0	0	0	0	0	0	0	0	0	0	0	0	0	0	0	0	0	0	0	0	0	0	0	0	0	0	0
X1493	Bacillariophyta	Bacillariophyta_X	Polar-centric-Mediophyceae	Brockmanniella	Brockmanniella brockmannii	0	0	0	2	0	0	0	0	0	0	0	0	0	0	0	0	0	0	0	0	0	0	0	0	0	0	0	0	0	0	0	0	0	0	0	0	0	0	0	0	0	0	0	0
X73	Bacillariophyta	Bacillariophyta_X	Polar-centric-Mediophyceae	Brockmanniella	Brockmanniella brockmannii	43	28	6	3	70	21	32	11	34	26	5	0	0	31	3	0	0	0	2	11	1	0	4	1	1	0	0	1	1	0	1	1	2	3	0	2	1	2	1	2	0	1	2	2
X3028	Bacillariophyta	Bacillariophyta_X	Polar-centric-Mediophyceae	Brockmanniella	Brockmanniella_brockmannii	0	0	0	1	0	0	0	0	0	0	0	0	0	0	3	1	0	0	0	0	0	0	0	0	0	0	0	0	0	0	0	0	0	0	0	0	0	0	0	0	0	0	0	1
X332	Bacillariophyta	Bacillariophyta_X	Polar-centric-Mediophyceae	Brockmanniella	Brockmanniella_brockmannii	56	110	84	25	4	29	45	177	85	77	22	8	3	6	33	10	1	3	18	15	0	4	20	1	1	1	2	4	2	3	0	1	4	4	6	6	0	0	0	0	0	0	0	0
X1589	Bicoecea	Anoecales	Caecitellaceae	Caecitellaceae_X	Caecitellaceae_X_sp.	4	0	0	0	0	0	1	0	0	0	0	0	0	0	0	0	0	0	0	0	1	0	1	0	0	0	0	0	0	0	2	0	0	0	0	0	0	0	0	0	0	0	0	0
X1573	Bicoecea	Anoecales	Cafeteriaceae	Cafeteria	Cafeteria_roenbergensis	0	1	0	0	0	0	0	0	0	0	0	0	0	0	0	0	0	0	0	0	0	0	0	0	0	0	1	0	0	0	0	0	0	0	0	0	0	0	0	0	0	0	0	0
X1093	Arthropoda	Crustacea	Maxillopoda	Calanus	Calanus_helgolandicus	0	0	0	11	0	0	0	2	0	2	0	8	0	0	0	0	0	0	0	0	10	0	0	0	0	0	0	1	32	0	3	0	0	0	6	15	3	10	0	20	0	10	3	1
X1275	Arthropoda	Crustacea	Maxillopoda	Calanus	Calanus_helgolandicus	0	0	0	1	0	0	0	0	0	0	0	0	0	0	0	0	0	0	0	0	0	0	0	0	0	0	0	0	0	0	0	0	0	0	0	0	0	0	0	0	0	157	0	0
X2375	Arthropoda	Crustacea	Maxillopoda	Calanus	Calanus_helgolandicus	0	0	0	0	0	0	0	0	4	0	0	0	0	0	0	0	0	0	0	0	30	0	0	0	0	0	0	0	1	0	0	0	0	0	3	0	0	2	0	1	0	0	0	0
X2376	Arthropoda	Crustacea	Maxillopoda	Calanus	Calanus_helgolandicus	0	0	0	0	0	0	0	0	1	3	0	1	0	0	0	0	0	0	0	0	22	0	0	0	0	0	0	0	1	0	0	5	0	0	1	1	0	1	0	0	0	8	0	0
X324	Arthropoda	Crustacea	Maxillopoda	Calanus	Calanus_helgolandicus	0	0	0	68	0	0	0	0	0	21	0	197	0	0	0	1	0	0	0	1	90	0	0	1	0	1	0	1	76	1	50	1	2	0	63	144	12	73	0	236	0	136	55	0
X4	Arthropoda	Crustacea	Maxillopoda	Calanus	Calanus_helgolandicus	52	5	1	74246	8	11	92	295	91	5954	12	51655	6	11	5	38	9	150	1	124	47481	7	71	60	36	544	29	538	20771	338	17266	120	55	13	35169	51555	2980	33772	4	39497	7	31550	23108	194
X519	Arthropoda	Crustacea	Maxillopoda	Calanus	Calanus_helgolandicus	0	0	0	164	0	0	0	0	0	2	0	72	0	0	0	0	0	0	0	0	17	0	0	0	0	3	0	0	32	2	4	1	0	0	5	141	11	46	0	54	0	49	97	0
X538	Arthropoda	Crustacea	Maxillopoda	Calanus	Calanus_helgolandicus	0	0	0	18	0	0	0	0	0	3	0	173	0	0	0	0	0	0	0	0	60	0	1	0	0	1	0	0	18	0	21	0	0	0	18	12	3	52	0	74	0	12	3	0
X663	Arthropoda	Crustacea	Maxillopoda	Calanus	Calanus_helgolandicus	0	0	0	72	0	0	0	0	0	1	0	15	0	0	0	0	0	0	0	0	44	0	0	0	0	0	0	0	17	0	5	0	0	0	13	42	2	19	0	18	0	10	6	1
X3734	Porifera	Porifera_X	Calcarea	Calcarea_X	Calcarea_X_sp.	0	0	1	0	0	0	0	4	0	0	0	0	0	0	0	0	0	0	0	0	0	0	2	0	0	0	0	0	0	0	0	0	0	0	0	0	0	0	0	0	0	0	0	0
X965	Prymnesiophyceae	Coccolithales	Calcidiscaceae	Calcidiscus	Calcidiscus_leptoporus	32	11	17	1	40	10	9	19	10	16	4	0	1	47	5	0	0	0	1	0	0	0	3	0	0	0	1	0	0	0	0	0	0	0	0	0	0	1	0	0	0	0	0	0
X2883	Nemertea	Nemertea_X	Nemertea_XX	Callinera	Callinera_grandis	0	0	0	0	0	0	0	0	0	0	0	0	0	0	0	0	0	0	0	0	0	0	0	0	0	0	0	0	0	0	0	0	0	0	0	0	0	0	0	0	0	0	0	0
X3508	Florideophyceae	Ceramiales	Callithamniaceae	Callithamnion	Callithamnion_collabens	0	0	0	0	0	0	0	0	0	1	0	0	0	0	0	0	0	0	0	0	0	0	0	0	0	0	0	0	0	0	0	0	0	0	0	0	0	0	0	0	0	0	0	0
X1465	Bryozoa	Bryozoa_X	Bryozoa_XX	Callopora	Callopora_lineata	0	0	0	0	0	0	0	0	1	1	0	0	0	0	0	0	0	0	0	0	0	0	0	0	0	0	0	0	0	0	0	0	0	0	0	8	0	0	0	0	0	0	0	0
X2864	Bryozoa	Bryozoa_X	Bryozoa_XX	Callopora	Callopora_lineata	0	0	0	0	0	0	0	0	0	0	0	0	0	0	0	0	0	0	0	0	0	0	0	0	0	0	0	0	0	0	0	0	0	0	0	0	0	0	0	0	0	1	0	0
X3997	Nematoda	Chromadorea	Chromadorea_X	Calomicrolaimus	Calomicrolaimus_parahonestus	0	0	0	0	0	0	0	0	0	0	0	0	0	0	0	0	0	0	0	0	0	0	0	0	0	0	0	0	0	0	0	0	0	0	0	0	0	0	0	0	0	0	0	0
X1906	Cnidaria	Cnidaria_X	Hydrozoa	Calycella	Calycella_syringa	0	0	0	0	0	0	0	0	0	0	0	0	0	0	0	0	0	0	0	0	0	0	0	0	0	0	0	0	0	0	0	0	0	0	0	0	0	0	0	0	0	17	0	0
X934	Arthropoda	Crustacea	Maxillopoda	Canuella	Canuella_perplexa	0	0	0	0	0	0	0	0	0	0	0	0	0	0	0	0	0	0	0	0	0	0	0	0	0	0	0	0	0	0	0	0	0	0	0	0	0	0	0	0	0	0	0	0
X1001	Annelida	Annelida_X	Annelida_XX	Capitella	Capitella_capitata	0	0	0	0	0	0	0	0	0	0	0	0	0	0	0	0	0	0	0	0	0	0	0	0	0	0	0	0	0	0	0	0	0	0	0	0	0	0	0	0	0	0	0	0
X1629	Ulvophyceae	Ulotrichales	Ulotrichales_X	Capsosiphon	Capsosiphon_fulvescens	0	0	0	0	0	0	0	0	0	0	0	0	0	0	1	0	0	0	0	0	2	0	0	0	0	0	0	0	0	0	0	0	0	0	0	0	0	0	0	0	0	0	0	0
X4273	Nemertea	Nemertea_X	Nemertea_XX	Carcinonemertes	Carcinonemertes_carcinophila	0	0	0	0	0	0	0	0	0	0	0	0	0	0	0	0	0	0	0	0	0	0	0	0	0	0	0	0	0	0	0	0	0	0	0	0	0	0	0	0	0	0	0	0
X1103	Arthropoda	Crustacea	Malacostraca	Carcinus	Carcinus_maenas	1	0	0	0	0	0	0	0	0	0	0	0	0	0	0	0	0	0	0	0	0	0	0	0	0	0	0	0	0	0	0	0	0	0	0	0	0	0	1	0	0	0	0	0
X1228	Arthropoda	Crustacea	Malacostraca	Carcinus	Carcinus_maenas	69	9	0	0	0	0	0	0	0	0	0	0	0	0	0	0	0	0	0	0	0	0	0	0	0	0	0	0	0	0	0	0	1	0	0	0	1	1	0	0	0	0	0	0
X4173	Mollusca	Bivalvia	Carditoida	Cardita	Cardita_calyculata	2	0	0	0	0	0	0	0	0	0	0	0	0	0	0	0	0	0	0	0	0	0	0	0	0	0	0	0	0	0	0	0	0	0	0	0	0	0	0	0	0	0	0	0
X4356	Mollusca	Bivalvia	Heteroconchia	Cardium	Cardium_edule	0	0	0	0	0	0	0	0	0	0	0	0	0	0	0	0	0	0	0	0	0	0	0	0	0	0	0	0	0	0	0	0	0	0	0	0	0	0	0	0	0	0	0	0
X473	Mollusca	Bivalvia	Heteroconchia	Cardium	Cardium_edule	0	0	0	0	0	0	0	0	0	0	0	0	0	0	0	0	0	0	0	0	0	0	0	0	0	0	0	0	0	0	0	0	0	60	0	0	0	46	0	0	0	0	0	0
X3714	Fornicata	Fornicata_X	Carpediomonas-like	Carpediemonas	Carpediemonas_sp.	0	0	0	0	0	0	0	0	0	0	0	0	0	0	0	0	0	0	0	0	0	0	0	0	0	0	0	0	0	0	0	0	0	0	0	0	0	0	0	0	0	0	0	0
X4179	Fornicata	Fornicata_X	Carpediomonas-like	Carpediemonas	Carpediemonas_sp.	0	0	0	0	0	0	0	0	0	0	0	0	0	0	0	0	0	0	0	0	0	0	0	0	0	0	0	0	0	0	0	0	0	0	0	0	0	0	0	0	0	0	0	0
X2020	Fornicata	Fornicata_X	Carpediomonas-like	Carpediomonas-like_X	Carpediomonas-like_X_sp.	0	1	0	1	3	0	0	0	0	0	0	0	0	0	0	0	0	0	0	0	0	0	0	0	0	0	0	0	0	0	0	0	0	0	0	0	0	0	0	0	0	0	0	0
X3406	Bacillariophyta	Bacillariophyta_X	Araphid-pennate	Catacombas	Catacombas_gaillonii	0	0	0	0	0	0	0	0	0	0	0	0	0	0	0	0	0	0	3	0	0	0	0	0	0	0	0	0	0	0	1	0	0	0	0	0	0	0	0	0	0	0	0	0
X109	Filosa-Thecofilosea	Ventricleftida	CCW10-lineage	CCW10-lineage_X	CCW10-lineage_X_sp.	43	42	16	32	122	36	106	223	93	88	19	6	3	74	18	2	1	1	23	42	2	3	37	0	4	0	6	2	0	0	0	2	1	1	3	1	0	1	1	0	0	0	0	0
X1431	Filosa-Thecofilosea	Ventricleftida	CCW10-lineage	CCW10-lineage_X	CCW10-lineage_X_sp.	0	0	0	0	0	0	7	0	0	0	0	0	0	0	0	0	0	0	0	0	0	0	0	0	0	0	0	0	0	0	0	0	0	0	0	0	0	0	0	0	0	0	0	1
X260	Filosa-Thecofilosea	Ventricleftida	CCW10-lineage	CCW10-lineage_X	CCW10-lineage_X_sp.	12	14	2	5	8	7	25	20	55	34	4	2	1	30	8	1	0	0	2	18	1	3	4	1	1	0	1	5	0	1	0	0	1	1	1	1	0	0	1	0	0	0	0	0
X265	Filosa-Thecofilosea	Ventricleftida	CCW10-lineage	CCW10-lineage_X	CCW10-lineage_X_sp.	19	2	0	0	1	0	2	0	3	2	2	0	0	0	0	0	0	0	0	4	0	0	2	0	0	0	0	0	1	1	2	1	0	1	1	5	0	1	0	2	0	0	1	2
X364	Filosa-Thecofilosea	Ventricleftida	CCW10-lineage	CCW10-lineage_X	CCW10-lineage_X_sp.	0	2	0	0	0	0	0	0	7	1	1	0	0	4	0	0	0	0	0	6	2	2	7	0	0	0	0	0	0	0	1	1	11	5	5	2	1	2	2	0	0	0	2	0
X887	Filosa-Thecofilosea	Ventricleftida	CCW10-lineage	CCW10-lineage_X	CCW10-lineage_X_sp.	0	2	0	0	0	0	0	0	0	0	0	0	0	0	0	1	0	0	0	4	0	1	0	0	0	0	0	0	0	0	0	0	0	0	0	0	0	0	0	0	0	0	0	0
X1170	Centroheliozoa_X	Centroheliozoa_XX	Centroheliozoa_XXX	Centroheliozoa_XXXX	Centroheliozoa_XXXX_sp.	0	0	0	0	0	0	0	0	0	0	0	0	0	0	0	0	0	0	0	0	0	0	0	0	0	0	0	0	0	0	0	0	0	0	0	0	0	0	0	0	0	0	0	0
X1242	Centroheliozoa_X	Centroheliozoa_XX	Centroheliozoa_XXX	Centroheliozoa_XXXX	Centroheliozoa_XXXX_sp.	0	0	0	0	0	0	0	0	0	0	0	0	0	0	0	0	0	0	0	0	0	0	0	0	0	0	0	0	0	0	0	0	0	0	0	0	0	0	0	0	0	0	0	0
X1551	Centroheliozoa_X	Centroheliozoa_XX	Centroheliozoa_XXX	Centroheliozoa_XXXX	Centroheliozoa_XXXX_sp.	0	0	0	1	0	0	0	5	1	0	5	0	1	1	0	0	0	0	0	0	0	0	0	0	1	0	0	0	0	0	0	0	0	0	0	0	0	0	0	0	0	0	0	1
X2207	Centroheliozoa_X	Centroheliozoa_XX	Centroheliozoa_XXX	Centroheliozoa_XXXX	Centroheliozoa_XXXX_sp.	1	0	1	0	0	1	0	8	0	1	0	1	0	0	0	0	0	0	0	0	0	0	0	0	0	0	0	0	0	0	0	1	0	0	0	0	0	0	0	0	0	0	0	0
X258	Centroheliozoa_X	Centroheliozoa_XX	Centroheliozoa_XXX	Centroheliozoa_XXXX	Centroheliozoa_XXXX_sp.	77	66	26	11	57	22	24	29	17	13	2	0	2	8	1	1	0	0	6	4	0	0	3	5	0	0	0	4	1	1	0	8	9	13	4	25	20	5	4	4	1	1	1	3
X3453	Centroheliozoa_X	Centroheliozoa_XX	Centroheliozoa_XXX	Centroheliozoa_XXXX	Centroheliozoa_XXXX_sp.	0	0	0	0	0	0	0	0	0	0	0	0	0	0	0	0	0	0	0	0	0	0	1	0	0	0	0	0	0	0	0	0	0	0	0	0	0	0	0	0	0	0	0	0
X3707	Centroheliozoa_X	Centroheliozoa_XX	Centroheliozoa_XXX	Centroheliozoa_XXXX	Centroheliozoa_XXXX_sp.	0	0	0	0	0	0	0	0	0	0	0	0	0	0	0	0	0	0	0	0	0	0	0	0	0	0	0	0	0	0	0	0	0	0	0	0	0	0	0	0	0	0	0	0
X4064	Centroheliozoa_X	Centroheliozoa_XX	Centroheliozoa_XXX	Centroheliozoa_XXXX	Centroheliozoa_XXXX_sp.	0	0	0	0	0	0	0	0	0	0	0	0	0	0	0	0	0	0	0	0	0	0	0	0	0	0	0	0	0	0	0	0	0	0	0	0	0	0	0	0	0	0	0	0
X4181	Centroheliozoa_X	Centroheliozoa_XX	Centroheliozoa_XXX	Centroheliozoa_XXXX	Centroheliozoa_XXXX_sp.	0	0	0	0	0	1	0	0	0	0	0	0	0	0	0	0	0	0	0	0	0	0	0	0	0	0	0	0	0	0	0	0	0	0	0	0	0	0	0	0	0	0	0	0
X1113	Arthropoda	Crustacea	Maxillopoda	Centropages	Centropages_hamatus	0	0	0	0	0	18	0	0	0	0	2	0	0	0	0	0	1	0	0	0	0	0	0	0	0	0	6	0	3	0	2	0	0	0	0	0	0	0	0	1	13	4	0	0
X1343	Arthropoda	Crustacea	Maxillopoda	Centropages	Centropages_hamatus	0	0	0	0	0	4	0	0	0	0	67	0	4	0	0	0	27	0	0	0	0	0	0	1	0	0	0	0	1	2	0	1	0	1	0	0	0	1	0	0	1	1	0	0
X14	Arthropoda	Crustacea	Maxillopoda	Centropages	Centropages_hamatus	24	1	2	1	5	3895	3	27	32	9	15684	35	4738	259	6	9	3969	6	0	3	8	3	18	87	0	2	1652	0	598	595	1249	759	4	1401	139	205	0	923	49	2888	3263	6744	1225	4
X1565	Arthropoda	Crustacea	Maxillopoda	Centropages	Centropages_hamatus	0	0	0	0	0	6	0	1	0	0	45	0	6	0	0	0	18	0	0	0	0	0	0	0	0	0	2	0	0	0	1	3	0	0	0	0	0	0	0	1	1	0	0	0
X1874	Arthropoda	Crustacea	Maxillopoda	Centropages	Centropages_hamatus	0	0	0	0	0	0	0	0	0	0	1	0	0	0	0	0	0	0	0	0	0	0	0	0	0	0	0	0	0	0	0	0	0	0	0	0	0	0	0	0	0	15	0	0
X1887	Arthropoda	Crustacea	Maxillopoda	Centropages	Centropages_hamatus	0	0	0	0	0	0	0	0	0	0	5	0	2	0	0	0	2	0	0	0	0	0	0	0	0	0	0	0	0	1	0	0	0	1	0	0	0	2	0	0	3	0	0	0
X2435	Arthropoda	Crustacea	Maxillopoda	Centropages	Centropages_hamatus	0	0	0	0	0	1	0	0	0	0	19	0	0	0	0	0	0	0	0	0	0	0	0	0	0	0	0	0	5	1	2	0	0	0	0	0	0	0	0	0	0	0	0	0
X2689	Arthropoda	Crustacea	Maxillopoda	Centropages	Centropages_hamatus	0	0	0	0	0	0	0	0	0	0	0	0	0	0	0	0	0	0	0	0	0	0	0	0	0	0	0	0	1	0	0	0	0	0	0	0	0	0	0	0	0	8	0	0
X2914	Arthropoda	Crustacea	Maxillopoda	Centropages	Centropages_hamatus	0	0	0	0	0	1	0	0	0	0	1	0	2	0	0	0	0	0	0	0	0	0	0	0	0	0	0	0	1	0	0	0	0	0	0	0	0	0	0	0	2	0	0	0
X3441	Arthropoda	Crustacea	Maxillopoda	Centropages	Centropages_hamatus	0	0	0	0	0	0	0	0	0	0	0	0	0	0	0	0	0	0	0	0	0	0	0	0	0	0	0	0	0	1	0	0	0	0	0	0	0	0	0	1	0	3	0	0
X613	Arthropoda	Crustacea	Maxillopoda	Centropages	Centropages_hamatus	0	0	0	0	0	0	0	0	0	0	0	0	0	0	0	0	0	0	0	0	0	0	0	0	0	0	0	0	0	0	0	0	0	0	0	0	0	0	0	0	0	0	0	0
X530	Arthropoda	Crustacea	Maxillopoda	Centropages	Centropages_typicus	20	0	0	0	0	1	0	33	0	0	0	0	0	11	0	0	0	0	0	0	0	0	0	0	0	0	0	0	0	0	0	0	0	0	0	0	0	0	0	0	0	0	0	0
X1418	Gregarinomorphea	Eugregarinorida	Cephaloidophoridae	Cephaloidophora	Cephaloidophora_communis	0	0	0	0	0	0	0	0	0	0	0	0	0	0	0	0	0	0	0	0	0	0	0	0	0	0	0	0	0	0	0	0	0	0	0	0	0	0	0	0	0	0	0	0
X1236	Gregarinomorphea	Eugregarinorida	Cephaloidophoridae	Cephaloidophora	Cephaloidophora_sp.	0	0	0	1	0	1	3	0	5	0	0	0	0	0	1	0	0	0	0	0	0	0	0	0	0	0	0	0	0	0	0	0	0	0	0	0	0	0	0	0	0	0	0	0
X1329	Gregarinomorphea	Eugregarinorida	Cephaloidophoridae	Cephaloidophora	Cephaloidophora_sp.	0	0	2	2	0	1	0	0	3	0	0	0	0	28	0	0	0	0	0	0	0	0	0	0	0	0	0	0	0	0	0	0	0	0	0	0	0	0	0	0	0	0	0	0
X169	Gregarinomorphea	Eugregarinorida	Cephaloidophoridae	Cephaloidophora	Cephaloidophora_sp.	1	0	9	28	0	13	40	208	29	0	0	0	0	212	13	0	0	0	11	4	0	2	15	0	0	0	0	0	1	0	0	0	2	0	1	1	1	0	1	0	0	0	0	0
X2968	Gregarinomorphea	Eugregarinorida	Cephaloidophoridae	Cephaloidophoridae_X	Cephaloidophoridae_X_sp.	0	0	0	0	0	0	0	0	0	0	0	0	0	0	0	0	0	0	0	0	0	0	0	0	0	0	0	0	0	0	0	0	0	0	0	0	0	0	0	0	0	0	0	0
X320	Gregarinomorphea	Eugregarinorida	Cephaloidophoridae	Cephaloidophoridae_X	Cephaloidophoridae_X_sp.	0	0	0	0	0	0	0	0	0	0	0	0	0	0	0	0	0	0	0	2	0	0	0	0	0	0	0	0	0	0	0	0	0	0	0	0	0	0	0	0	1	0	0	0
X3248	Gregarinomorphea	Eugregarinorida	Cephaloidophoridae	Cephaloidophoridae_X	Cephaloidophoridae_X_sp.	0	0	0	0	0	0	0	0	0	0	0	0	0	0	0	0	0	0	0	0	0	0	0	0	0	0	0	0	0	0	0	0	0	0	0	0	0	0	0	0	0	0	0	0
X917	Gregarinomorphea	Eugregarinorida	Cephaloidophoridae	Cephaloidophoridae_X	Cephaloidophoridae_X_sp.	0	0	0	0	0	0	0	0	0	0	0	0	0	0	0	0	0	0	0	0	0	0	0	0	0	0	0	0	0	0	0	0	0	0	0	0	0	0	0	0	0	0	0	0
X3825	Ascomycota	Pezizomycotina	Sordariomycetes	Cephalotheca	Cephalotheca_sulfurea	0	0	0	0	0	0	0	0	0	0	0	0	0	0	0	0	0	0	0	0	0	0	0	0	0	0	0	0	0	0	0	0	0	0	0	0	0	0	0	0	0	0	0	0
X297	Nemertea	Nemertea_X	Nemertea_XX	Cephalothrix	Cephalothrix_filiformis	164	118	18	13	10	10	1	3	0	1	1	0	0	7	0	0	0	0	0	0	0	0	0	0	0	0	0	0	0	1	0	0	0	0	0	0	0	0	0	0	0	0	0	4
X3323	Nemertea	Nemertea_X	Nemertea_XX	Cephalothrix	Cephalothrix_hongkongiensis	1	0	0	0	0	0	0	1	0	0	0	0	0	0	0	0	0	0	0	0	0	0	0	0	0	0	0	0	0	0	0	0	0	0	0	0	0	0	0	0	0	0	0	0
X3411	Florideophyceae	Ceramiales	Ceramiaceae	Ceramium	Ceramium_inkyuii	0	0	0	0	0	0	0	0	0	0	0	0	0	0	0	0	0	0	0	0	0	0	0	0	0	0	0	0	0	0	0	0	0	0	0	0	0	0	0	0	0	0	0	0
X1475	Florideophyceae	Ceramiales	Ceramiaceae	Ceramium	Ceramium_rubrum	0	0	0	0	0	0	1	0	0	0	0	0	0	0	0	0	0	0	0	1	1	0	2	0	0	0	0	0	0	0	0	0	0	0	0	0	0	0	0	0	0	0	0	0
X673	Florideophyceae	Ceramiales	Ceramiaceae	Ceramium	Ceramium_rubrum	2	0	0	0	0	0	2	0	0	4	0	0	0	9	2	0	0	0	0	2	1	0	4	0	0	0	0	0	0	0	0	0	0	0	0	0	0	0	0	0	0	0	0	0
X1078	Bacillariophyta	Bacillariophyta_X	Polar-centric-Mediophyceae	Cerataulina	Cerataulina_pelagica	0	0	0	0	0	0	0	0	0	0	0	0	0	0	0	0	0	0	0	0	0	0	1	0	0	0	1	0	0	2	0	1	0	0	0	0	1	1	4	3	12	7	0	10
X12	Bacillariophyta	Bacillariophyta_X	Polar-centric-Mediophyceae	Cerataulina	Cerataulina_pelagica	0	2	0	1	0	0	0	0	4	0	0	3	1	0	0	45	49	33	97	37	40	42	82	124	43	64	148	164	182	244	241	108	200	185	217	1276	293	1345	2367	1773	6807	5853	2000	8316
X1351	Bacillariophyta	Bacillariophyta_X	Polar-centric-Mediophyceae	Cerataulina	Cerataulina_pelagica	0	0	0	0	0	0	0	0	0	0	0	0	0	0	0	0	0	0	0	0	0	0	0	0	0	0	0	0	0	0	0	0	0	0	0	0	0	0	1	0	2	1	0	2
X1741	Bacillariophyta	Bacillariophyta_X	Polar-centric-Mediophyceae	Cerataulina	Cerataulina_pelagica	0	0	0	0	0	0	0	0	0	0	0	0	0	0	0	1	1	0	0	0	0	0	0	3	0	0	0	0	1	1	0	0	0	0	0	0	1	0	0	1	0	1	1	0
X1824	Bacillariophyta	Bacillariophyta_X	Polar-centric-Mediophyceae	Cerataulina	Cerataulina_pelagica	0	0	0	0	0	0	0	0	0	0	0	0	0	0	0	0	0	0	0	0	0	0	0	0	0	0	0	0	0	0	1	1	1	3	0	3	0	1	4	4	4	1	0	3
X1879	Bacillariophyta	Bacillariophyta_X	Polar-centric-Mediophyceae	Cerataulina	Cerataulina_pelagica	0	0	0	0	0	0	0	0	0	0	0	0	0	0	0	0	0	0	0	0	0	0	0	0	0	0	0	0	0	0	0	0	0	0	0	0	0	0	0	0	1	0	0	0
X1923	Bacillariophyta	Bacillariophyta_X	Polar-centric-Mediophyceae	Cerataulina	Cerataulina_pelagica	0	0	0	0	0	0	0	0	0	0	0	0	0	0	0	0	0	0	0	0	0	0	0	1	0	0	0	1	0	0	0	1	0	0	0	0	0	0	1	1	0	0	0	0
X2203	Bacillariophyta	Bacillariophyta_X	Polar-centric-Mediophyceae	Cerataulina	Cerataulina_pelagica	0	0	0	0	0	0	0	0	0	0	0	0	0	0	0	0	0	0	0	0	0	0	0	0	0	0	0	0	0	0	0	0	0	0	0	0	0	0	0	0	0	0	0	0
X2283	Bacillariophyta	Bacillariophyta_X	Polar-centric-Mediophyceae	Cerataulina	Cerataulina_pelagica	0	0	0	0	0	0	0	0	0	0	0	0	0	0	0	0	0	0	0	0	0	0	0	0	0	0	0	0	0	0	0	0	0	0	0	0	0	0	0	0	3	0	1	13
X2478	Bacillariophyta	Bacillariophyta_X	Polar-centric-Mediophyceae	Cerataulina	Cerataulina_pelagica	0	0	0	0	0	0	0	0	0	0	0	0	0	0	0	0	0	0	0	0	0	0	0	0	0	0	0	0	0	1	0	0	0	0	0	0	0	1	1	1	3	1	0	1
X2595	Bacillariophyta	Bacillariophyta_X	Polar-centric-Mediophyceae	Cerataulina	Cerataulina_pelagica	0	0	0	0	0	0	0	0	0	0	0	0	0	0	0	0	0	0	0	0	0	0	0	0	0	0	0	0	0	0	0	0	0	0	0	1	0	0	0	0	3	0	0	3
X2756	Bacillariophyta	Bacillariophyta_X	Polar-centric-Mediophyceae	Cerataulina	Cerataulina_pelagica	0	0	0	0	0	0	0	0	0	0	0	0	0	0	0	0	0	0	0	0	0	0	0	0	0	0	0	0	0	0	0	0	0	0	0	0	0	0	0	0	0	1	0	0
X594	Bacillariophyta	Bacillariophyta_X	Polar-centric-Mediophyceae	Cerataulina	Cerataulina_pelagica	0	0	0	0	0	0	0	0	0	0	1	0	0	0	0	0	0	0	0	0	0	0	0	1	0	0	1	0	0	1	0	1	3	1	1	7	0	5	11	2	18	8	1	23
X626	Bacillariophyta	Bacillariophyta_X	Polar-centric-Mediophyceae	Cerataulina	Cerataulina_pelagica	0	0	0	0	0	0	0	0	0	0	0	0	0	0	0	0	0	0	0	1	0	0	1	2	0	0	0	0	0	3	5	0	0	2	0	9	2	6	20	5	31	20	6	38
X1061	Bacillariophyta	Bacillariophyta_X	Polar-centric-Mediophyceae	Cerataulus	Cerataulus_smithii	2	26	7	0	1	2	11	0	11	5	1	0	0	2	0	0	0	0	0	0	0	1	0	0	0	1	0	0	2	0	0	0	0	0	0	0	0	0	0	0	0	0	0	0
X2986	Bacillariophyta	Bacillariophyta_X	Polar-centric-Mediophyceae	Cerataulus	Cerataulus_smithii	0	0	0	0	0	1	0	1	0	0	0	0	0	0	0	0	0	0	0	0	0	0	0	0	0	0	0	0	0	0	0	0	0	0	0	0	0	0	0	0	0	0	0	0
X3006	Bacillariophyta	Bacillariophyta_X	Polar-centric-Mediophyceae	Cerataulus	Cerataulus_smithii	0	0	0	0	0	0	0	0	0	0	0	0	0	0	0	0	0	0	0	0	0	0	0	0	0	0	0	0	0	0	0	0	0	0	0	0	0	0	0	0	0	0	0	0
X3160	Bacillariophyta	Bacillariophyta_X	Polar-centric-Mediophyceae	Cerataulus	Cerataulus_smithii	0	0	0	0	0	0	0	0	0	0	0	0	0	0	0	0	0	0	0	0	0	0	0	0	0	0	0	0	0	0	0	0	0	0	0	0	0	0	0	0	0	0	0	0
X2369	Cercozoa_X	Cercozoa_XX	Cercozoa_XXX	Cercozoa_XXXX	Cercozoa_XXXX_sp.	0	0	0	0	0	0	0	0	1	0	0	0	0	0	0	0	0	0	0	0	1	0	2	0	0	0	0	0	0	0	0	0	0	0	0	0	0	0	0	0	0	0	0	0
X1174	Nemertea	Nemertea_X	Nemertea_XX	Cerebratulus	Cerebratulus_lacteus	0	0	0	0	0	0	0	0	0	0	0	0	0	0	0	0	0	0	0	0	0	0	0	0	0	0	0	0	0	0	0	0	0	0	0	0	0	0	0	0	0	0	0	0
X2098	Nemertea	Nemertea_X	Nemertea_XX	Cerebratulus	Cerebratulus_lacteus	0	0	0	0	0	0	0	0	0	0	0	2	0	0	0	0	0	0	0	0	0	0	0	0	0	0	0	0	0	0	0	0	0	0	0	0	0	0	0	0	0	0	0	0
X731	Cnidaria	Cnidaria_X	Anthozoa	Ceriantheopsis	Ceriantheopsis_americana	10	0	1	1	6	1	0	3	1	1	0	0	0	0	0	0	0	2	0	0	0	0	0	0	0	0	0	0	0	0	0	0	0	0	0	0	0	0	0	0	0	0	0	0
X804	Bacillariophyta	Bacillariophyta_X	Polar-centric-Mediophyceae	Chaetoceros	Chaetoceros_anastomosans	0	0	0	0	0	0	0	0	1	1	0	0	0	5	0	0	0	0	0	0	0	0	1	0	0	1	2	0	0	0	0	1	0	0	0	0	0	0	0	0	0	0	0	0
X1622	Bacillariophyta	Bacillariophyta_X	Polar-centric-Mediophyceae	Chaetoceros	Chaetoceros_brevis_1	6	0	0	0	0	2	0	12	0	0	0	0	0	0	0	0	0	0	0	0	0	0	0	0	0	0	0	0	0	0	0	0	0	0	0	0	0	0	0	0	0	0	0	0
X317	Bacillariophyta	Bacillariophyta_X	Polar-centric-Mediophyceae	Chaetoceros	Chaetoceros_cf_convolutus	0	0	0	0	0	3	1	0	0	0	0	1	0	0	4	5	0	0	3	0	1	4	17	1	4	0	15	0	7	0	0	0	3	0	7	19	0	6	0	0	0	0	6	0
X385	Bacillariophyta	Bacillariophyta_X	Polar-centric-Mediophyceae	Chaetoceros	Chaetoceros_cf_convolutus	0	0	0	0	0	0	0	0	0	0	0	0	0	0	0	1	0	0	1	3	1	5	4	4	0	6	6	11	2	3	6	0	7	7	4	21	2	16	12	11	62	20	4	57
X3120	Bacillariophyta	Bacillariophyta_X	Polar-centric-Mediophyceae	Chaetoceros	Chaetoceros_contortus	0	0	0	0	0	0	0	0	0	0	0	0	0	0	0	0	0	0	0	0	0	0	0	0	0	0	0	0	0	0	0	0	0	0	0	0	0	0	0	0	0	0	0	0
X92	Bacillariophyta	Bacillariophyta_X	Polar-centric-Mediophyceae	Chaetoceros	Chaetoceros_contortus	2	3	0	0	0	1	0	0	1	0	0	0	1	0	1	0	1	1	0	0	0	0	0	0	1	0	1	0	0	0	0	0	0	0	0	1	0	0	1	0	22	5	0	15
X2893	Bacillariophyta	Bacillariophyta_X	Polar-centric-Mediophyceae	Chaetoceros	Chaetoceros_contortus_cf_var_contortus	0	0	0	0	0	0	0	0	0	0	0	0	0	0	0	0	0	0	0	0	0	0	0	0	0	0	0	0	0	0	0	0	0	0	0	0	0	0	0	0	0	0	0	0
X921	Bacillariophyta	Bacillariophyta_X	Polar-centric-Mediophyceae	Chaetoceros	Chaetoceros_curvisetus_1	0	2	0	0	0	1	0	0	0	0	0	0	0	0	0	0	1	0	0	3	0	0	0	0	0	1	0	2	0	0	1	0	2	0	0	1	1	0	1	1	7	5	2	4
X1900	Bacillariophyta	Bacillariophyta_X	Polar-centric-Mediophyceae	Chaetoceros	Chaetoceros_danicus	0	0	0	0	1	0	0	0	2	0	0	0	1	0	0	0	0	0	0	0	0	0	0	0	0	0	0	0	0	0	0	1	0	0	0	1	0	0	0	0	0	0	0	0
X254	Bacillariophyta	Bacillariophyta_X	Polar-centric-Mediophyceae	Chaetoceros	Chaetoceros_danicus	38	16	16	11	22	6	22	120	59	57	27	6	9	177	53	26	15	5	25	10	3	16	44	17	13	8	15	17	15	11	16	16	15	23	8	52	9	5	10	1	9	3	3	17
X3144	Bacillariophyta	Bacillariophyta_X	Polar-centric-Mediophyceae	Chaetoceros	Chaetoceros_danicus	0	0	0	1	0	1	0	0	0	0	0	0	0	0	0	1	0	0	0	0	0	0	0	1	0	0	0	0	0	0	0	0	0	0	0	0	0	0	0	0	0	0	0	0
X946	Bacillariophyta	Bacillariophyta_X	Polar-centric-Mediophyceae	Chaetoceros	Chaetoceros_danicus	0	2	1	0	1	1	2	9	8	2	1	1	0	1	4	6	2	2	4	1	0	1	8	3	2	0	0	3	1	1	2	1	4	2	0	4	1	2	1	0	1	0	0	3
X2390	Bacillariophyta	Bacillariophyta_X	Polar-centric-Mediophyceae	Chaetoceros	Chaetoceros_debilis	0	0	0	0	0	0	0	0	0	0	0	0	0	0	0	0	0	0	0	3	0	0	1	0	0	0	0	0	0	0	0	0	0	1	0	1	0	1	0	0	0	0	0	0
X631	Bacillariophyta	Bacillariophyta_X	Polar-centric-Mediophyceae	Chaetoceros	Chaetoceros_debilis	3	5	0	0	3	1	0	6	2	0	0	0	0	0	0	5	4	1	8	8	1	1	10	3	4	0	4	2	1	1	0	0	1	0	0	2	0	2	0	2	0	0	0	0
X62	Bacillariophyta	Bacillariophyta_X	Polar-centric-Mediophyceae	Chaetoceros	Chaetoceros_debilis_1	0	0	0	0	0	0	0	0	0	0	0	1	0	7	0	84	55	44	163	106	20	71	446	380	156	61	374	297	284	267	513	102	158	138	142	1132	144	844	1741	510	90	28	9	81
X483	Bacillariophyta	Bacillariophyta_X	Polar-centric-Mediophyceae	Chaetoceros	Chaetoceros_decipiens	0	0	0	0	0	0	0	0	0	0	0	0	0	5	0	9	12	2	8	0	4	3	13	4	0	1	2	6	1	2	5	5	3	0	3	16	1	0	3	0	0	0	0	0
X51	Bacillariophyta	Bacillariophyta_X	Polar-centric-Mediophyceae	Chaetoceros	Chaetoceros_diadema_1	20	0	21	0	7	5	0	20	2	0	1	0	0	16	0	21	21	12	21	16	8	20	125	52	35	13	88	87	104	72	177	48	47	46	41	125	9	36	61	6	38	19	9	51
X1042	Bacillariophyta	Bacillariophyta_X	Polar-centric-Mediophyceae	Chaetoceros	Chaetoceros_dichaeta	0	0	0	0	0	0	0	0	0	0	0	0	0	0	0	0	0	0	0	0	0	0	0	0	0	0	0	0	0	0	0	0	0	0	0	0	0	0	0	0	0	0	0	0
X1338	Bacillariophyta	Bacillariophyta_X	Polar-centric-Mediophyceae	Chaetoceros	Chaetoceros_dichaeta	0	0	0	0	0	0	0	0	0	0	0	0	0	0	0	0	0	0	0	0	0	0	0	0	0	0	0	0	0	0	0	0	0	0	0	0	0	0	0	0	0	0	0	0
X148	Bacillariophyta	Bacillariophyta_X	Polar-centric-Mediophyceae	Chaetoceros	Chaetoceros_dichaeta	0	0	0	0	0	0	0	0	0	1	0	0	0	0	0	0	0	0	1	0	0	0	0	0	0	0	0	0	0	0	0	0	0	0	0	0	0	0	0	0	0	0	0	0
X1671	Bacillariophyta	Bacillariophyta_X	Polar-centric-Mediophyceae	Chaetoceros	Chaetoceros_dichaeta	0	0	0	0	0	0	0	0	0	0	0	0	0	0	0	0	0	0	0	0	0	0	0	0	0	0	0	0	0	0	0	0	0	0	0	0	0	0	0	0	0	0	0	0
X2143	Bacillariophyta	Bacillariophyta_X	Polar-centric-Mediophyceae	Chaetoceros	Chaetoceros_dichaeta	0	0	0	0	0	0	0	0	0	0	0	0	0	0	0	0	0	0	0	0	0	0	0	0	0	0	0	0	0	0	0	0	0	0	0	0	0	0	0	0	0	0	0	0
X242	Bacillariophyta	Bacillariophyta_X	Polar-centric-Mediophyceae	Chaetoceros	Chaetoceros_dichatoensis	6	2	4	2	11	0	3	0	3	1	0	0	0	0	0	3	1	2	9	10	2	3	19	5	4	3	11	19	8	17	18	12	31	28	30	124	18	26	41	7	14	29	5	46
X1152	Bacillariophyta	Bacillariophyta_X	Polar-centric-Mediophyceae	Chaetoceros	Chaetoceros_didymus_1	0	0	0	0	1	0	0	0	2	0	0	0	0	0	0	0	2	1	1	0	0	0	0	1	0	0	2	0	1	0	0	0	0	0	1	2	0	3	2	0	2	5	1	12
X507	Bacillariophyta	Bacillariophyta_X	Polar-centric-Mediophyceae	Chaetoceros	Chaetoceros_eibenii	0	0	0	1	0	0	0	0	0	0	0	0	0	0	34	21	20	5	43	11	26	10	230	23	9	24	45	16	37	16	18	14	19	38	11	9	2	2	5	0	4	3	0	10
X3960	Bacillariophyta	Bacillariophyta_X	Polar-centric-Mediophyceae	Chaetoceros	Chaetoceros_protuberans	0	0	0	0	0	0	0	0	3	0	0	0	0	0	0	0	0	0	0	0	0	0	0	0	0	0	0	0	0	0	0	1	0	0	0	0	0	0	1	0	0	0	0	0
X3548	Bacillariophyta	Bacillariophyta_X	Polar-centric-Mediophyceae	Chaetoceros	Chaetoceros_pumilum	0	0	0	0	2	0	0	0	0	0	0	0	0	5	0	0	0	0	0	0	0	0	0	0	0	0	0	0	0	0	0	0	0	0	0	0	0	0	0	0	0	0	0	0
X1395	Bacillariophyta	Bacillariophyta_X	Polar-centric-Mediophyceae	Chaetoceros	Chaetoceros_radicans	0	0	0	0	0	0	0	0	0	0	0	0	0	0	0	0	0	0	0	0	0	0	0	0	0	0	0	0	1	0	0	0	0	0	0	0	1	0	0	0	0	0	0	0
X759	Bacillariophyta	Bacillariophyta_X	Polar-centric-Mediophyceae	Chaetoceros	Chaetoceros_radicans	0	0	0	0	0	0	0	0	0	0	0	0	0	0	0	0	0	0	0	1	0	0	4	0	0	1	1	0	0	1	0	0	0	0	0	2	0	1	0	1	1	1	1	0
X174	Bacillariophyta	Bacillariophyta_X	Polar-centric-Mediophyceae	Chaetoceros	Chaetoceros_socialis	29	9	4	1	12	1	3	2	0	1	1	0	0	4	1	13	7	15	22	22	10	14	47	25	16	16	25	14	11	20	22	21	18	40	20	102	13	33	48	6	10	50	7	87
X1309	Bacillariophyta	Bacillariophyta_X	Polar-centric-Mediophyceae	Chaetoceros	Chaetoceros_tenuissimus	2	0	1	2	4	0	3	4	4	1	1	0	0	0	1	3	2	0	1	2	0	0	0	1	0	0	1	3	0	0	1	1	1	3	0	3	1	1	0	0	0	0	0	1
X2338	Bacillariophyta	Bacillariophyta_X	Polar-centric-Mediophyceae	Chaetoceros	Chaetoceros_teres	0	0	0	0	0	0	0	0	0	0	0	0	0	0	0	0	0	0	0	1	0	0	0	0	0	0	0	0	0	0	0	0	0	0	0	0	0	0	0	0	0	0	0	0
X2389	Bacillariophyta	Bacillariophyta_X	Polar-centric-Mediophyceae	Chaetoceros	Chaetoceros_teres	0	0	0	0	0	0	0	0	0	0	0	0	0	0	0	1	6	0	0	0	0	0	0	0	0	0	0	0	0	0	0	0	0	0	0	0	0	1	0	0	0	0	0	0
X2438	Bacillariophyta	Bacillariophyta_X	Polar-centric-Mediophyceae	Chaetoceros	Chaetoceros_teres	0	0	0	0	0	0	0	0	0	0	0	0	0	0	0	2	0	0	1	2	0	0	0	0	0	0	0	0	0	0	0	0	0	0	0	0	0	0	0	1	0	0	0	0
X3641	Bacillariophyta	Bacillariophyta_X	Polar-centric-Mediophyceae	Chaetoceros	Chaetoceros_teres	0	0	0	0	0	0	0	0	0	0	0	0	0	0	0	0	0	0	0	0	0	0	0	0	0	0	0	0	0	0	0	0	0	0	0	0	0	0	0	0	0	0	0	0
X37	Bacillariophyta	Bacillariophyta_X	Polar-centric-Mediophyceae	Chaetoceros	Chaetoceros_teres	0	0	0	0	4	0	0	0	5	0	0	0	2	5	3	102	165	52	71	49	17	16	80	9	6	6	4	10	1	1	5	3	6	2	3	10	1	1	3	0	0	0	0	0
X1116	Bacillariophyta	Bacillariophyta_X	Polar-centric-Mediophyceae	Chaetoceros	Chaetoceros_throndsenii	1	0	0	0	3	0	0	4	4	1	2	0	0	1	0	2	2	0	3	0	1	1	1	4	1	1	1	0	1	0	1	0	3	2	0	5	0	0	3	0	0	0	0	0
X1556	Bacillariophyta	Bacillariophyta_X	Polar-centric-Mediophyceae	Chaetoceros	Chaetoceros_throndsenii	0	0	0	0	0	0	0	0	0	0	0	0	0	0	0	0	0	0	0	0	0	0	0	0	0	0	0	0	0	0	0	0	0	0	0	0	0	0	0	0	0	0	0	0
X204	Bacillariophyta	Bacillariophyta_X	Polar-centric-Mediophyceae	Chaetoceros	Chaetoceros_throndsenii	12	15	16	7	69	14	48	85	17	37	17	6	7	66	27	16	7	2	21	18	1	9	20	14	9	0	10	0	3	10	6	9	12	20	12	41	14	7	18	12	0	0	0	0
X374	Bacillariophyta	Bacillariophyta_X	Polar-centric-Mediophyceae	Chaetoceros	Chaetoceros_throndsenii	4	0	0	0	1	1	0	0	0	0	1	0	0	1	0	1	0	0	1	1	0	0	0	0	1	0	0	3	1	0	0	0	0	0	0	4	0	0	1	0	0	0	0	0
X834	Bacillariophyta	Bacillariophyta_X	Polar-centric-Mediophyceae	Chaetoceros	Chaetoceros_throndsenii	0	0	0	0	0	0	0	0	0	0	2	0	0	0	0	0	0	0	0	0	0	0	0	0	0	0	0	0	0	0	0	0	0	0	0	0	0	0	0	0	0	0	0	0
X3585	Ulvophyceae	Cladophorales	Cladophorales_X	Chaetomorpha	Chaetomorpha_ligustica	0	0	0	0	0	0	0	0	0	0	0	0	0	0	0	0	0	0	0	0	0	0	0	0	0	0	0	0	0	0	0	0	0	0	0	0	0	0	0	0	0	0	0	0
X772	Annelida	Annelida_X	Annelida_XX	Chaetopterus	Chaetopterus_pugaporcinus	0	0	0	0	0	0	0	0	0	0	0	0	0	0	0	0	1	0	0	0	0	0	0	0	0	0	0	0	0	0	0	0	0	1	0	2	0	0	0	0	0	0	0	0
X2792	Urochordata	Urochordata_X	Ascidiacea	Chelyosoma	Chelyosoma_siboja	0	0	0	0	0	0	0	0	0	0	0	0	0	0	0	0	0	0	0	0	0	0	0	0	0	0	0	0	0	0	0	0	0	0	0	0	0	1	0	0	0	0	0	0
X1313	Chlorophyceae	Chlamydomonadales	Chlamydomonadales_X	Chlamydomonas	Chlamydomonas_parkeae	1	1	0	0	0	1	1	0	0	1	1	1	1	0	0	0	0	0	0	0	0	0	0	0	0	0	0	0	0	0	0	0	0	1	0	0	0	0	0	0	0	0	0	0
X3256	Chlorophyceae	Chlamydomonadales	Chlamydomonadales_X	Chlamydomonas	Chlamydomonas_reginae	0	0	0	0	0	0	0	0	0	0	0	0	0	0	0	0	0	0	0	0	0	0	0	0	0	0	0	0	0	0	0	0	0	0	0	0	0	0	0	0	0	0	0	0
X1120	Chlorarachniophyceae	Chlorarachnida	Chlorarachnida_X	Chlorarachnion	Chlorarachnion_sp.	0	0	0	2	0	1	2	0	0	0	0	0	0	0	0	0	0	1	0	3	2	1	4	1	0	0	0	1	0	2	0	0	0	0	0	3	0	2	1	0	1	0	0	1
X2716	Chlorarachniophyceae	Chlorarachnida	Chlorarachnida_X	Chlorarachnion	Chlorarachnion_sp.	0	0	0	0	0	0	0	0	0	0	0	0	0	0	0	0	0	0	0	0	0	0	0	0	0	0	0	0	0	0	0	0	1	0	0	0	0	0	0	0	0	0	0	0
X2742	Chlorarachniophyceae	Chlorarachnida	Chlorarachnida_X	Chlorarachnion	Chlorarachnion_sp.	0	0	0	0	0	0	0	0	0	0	0	0	0	0	0	0	0	0	0	0	0	0	0	0	0	0	0	0	0	0	0	0	0	0	0	0	0	0	0	0	0	0	0	0
X3215	Chlorarachniophyceae	Chlorarachnida	Chlorarachnida_X	Chlorarachnion	Chlorarachnion_sp.	0	0	0	0	0	0	0	0	0	0	0	0	0	0	0	0	0	0	0	0	0	0	0	0	0	0	0	0	0	0	0	0	0	0	0	0	0	0	0	0	0	0	0	0
X400	Trebouxiophyceae	Watanabea-Clade	Watanabea-Clade_X	Chloroidium	Chloroidium_ellipsoideum	47	64	1	0	1	15	103	0	1	2	4	0	0	44	4	1	0	0	0	0	10	0	7	4	0	0	0	0	18	0	0	0	0	0	0	0	0	0	0	0	1	0	0	0
X996	Trebouxiophyceae	Watanabea-Clade	Watanabea-Clade_X	Chloroidium	Chloroidium_ellipsoideum	11	32	0	0	0	0	35	0	0	0	0	0	0	0	0	0	0	0	0	0	0	0	0	1	0	1	0	0	0	0	0	0	0	0	0	0	0	0	0	0	0	0	0	0
X2122	Trebouxiophyceae	Watanabea-Clade	Watanabea-Clade_X	Chloroidium	Chloroidium_saccharophila	2	9	0	0	0	0	0	0	0	0	0	0	0	0	0	0	0	0	0	0	1	0	0	0	0	0	0	0	0	0	0	0	0	0	0	0	0	0	0	0	0	0	0	0
X310	Trebouxiophyceae	Watanabea-Clade	Watanabea-Clade_X	Chloroidium	Chloroidium_saccharophilum	138	248	0	0	3	7	186	0	8	0	1	0	0	5	0	0	0	0	0	0	17	0	10	3	0	2	0	0	3	0	0	0	0	0	0	0	0	0	0	0	0	0	0	0
X1534	Chloropicophyceae	Chloropicales	Chloropicaceae	Chloroparvula	Chloroparvula_pacifica	0	1	0	1	2	0	0	1	0	0	0	0	0	0	0	0	0	0	0	0	0	0	0	0	0	0	0	0	0	0	0	0	0	0	0	0	0	0	0	0	0	0	0	0
X2760	Chloropicophyceae	Chloropicales	Chloropicaceae	Chloroparvula	Chloroparvula_pacifica	0	2	0	0	1	0	0	0	0	0	0	0	0	0	0	0	0	0	0	0	0	0	0	0	0	0	0	0	0	0	0	0	0	0	0	0	0	0	0	0	0	0	0	0
X2419	Chloropicophyceae	Chloropicales	Chloropicaceae	Chloropicon	Chloropicon_roscoffensis	0	1	0	0	0	0	0	0	0	0	0	0	0	0	0	0	0	0	0	0	0	0	0	0	0	0	0	0	0	0	0	0	0	0	0	0	0	0	0	0	0	0	0	0
X1234	Choanoflagellatea	Craspedida	Monosigidae_Group_A	Choanoeca	Choanoeca_perplexa	1	2	1	0	0	0	0	0	1	0	2	0	0	0	0	0	0	0	0	0	0	0	0	0	0	0	0	0	0	0	0	0	0	0	0	0	0	0	0	0	0	0	0	0
X2676	Trebouxiophyceae	Trebouxiophyceae_X	Trebouxiophyceae_XX	Choricystis	Choricystis_minor	0	0	0	0	0	0	0	0	0	0	0	0	0	0	0	0	0	0	0	0	0	0	0	0	0	0	0	0	0	0	0	0	0	0	0	0	0	0	0	1	0	0	0	0
X2764	Trebouxiophyceae	Trebouxiophyceae_X	Trebouxiophyceae_XX	Choricystis	Choricystis_minor	0	0	0	0	0	0	0	0	0	0	0	0	0	0	0	0	0	0	0	0	0	0	0	0	0	0	0	0	0	0	0	0	0	0	0	0	0	0	0	0	0	0	0	0
X1882	Trebouxiophyceae	Trebouxiophyceae_X	Trebouxiophyceae_XX	Choricystis	Choricystis_sp.	4	0	0	0	2	0	1	1	1	0	0	0	0	0	0	0	0	0	0	1	0	0	0	0	0	0	0	0	0	0	0	0	0	0	0	0	0	0	0	0	0	0	0	0
X2691	Nematoda	Chromadorea	Chromadorea_X	Chromadorina	Chromadorina_sp.	0	0	0	0	0	0	0	0	0	0	0	0	0	0	0	0	0	0	0	0	0	0	0	0	0	0	0	0	0	0	0	0	0	0	0	0	0	0	0	0	0	0	0	0
X1713	Cryptophyceae	Cryptomonadales	Hemiselmidaceae	Chroomonas	Chroomonas_sp.	0	1	0	0	2	1	1	3	2	2	0	0	0	0	0	0	0	0	0	0	0	0	1	0	0	0	0	0	0	0	0	0	0	0	0	0	0	0	0	0	0	0	0	0
X891	Prymnesiophyceae	Prymnesiales	Prymnesiales_X	Chrysocampanula	Chrysocampanula_spinifera	0	0	0	0	0	0	0	0	0	0	0	0	0	0	0	0	0	0	0	0	0	0	0	0	0	0	0	0	0	0	0	0	0	0	0	0	0	0	0	0	0	0	0	0
X129	Prymnesiophyceae	Prymnesiales	Chrysochromulinaceae	Chrysochromulina	Chrysochromulina_rotalis	40	8	2	3	38	8	15	7	20	5	2	1	0	15	1	1	0	0	0	10	0	0	2	2	0	0	1	0	0	0	0	0	0	0	1	1	0	0	1	0	0	1	0	1
X241	Prymnesiophyceae	Prymnesiales	Chrysochromulinaceae	Chrysochromulina	Chrysochromulina_scutellum	13	2	0	1	9	1	2	0	3	1	0	0	0	0	0	1	0	0	1	1	0	0	2	0	0	0	0	0	0	0	0	0	0	0	0	0	0	0	0	0	0	0	0	1
X1028	Prymnesiophyceae	Prymnesiales	Chrysochromulinaceae	Chrysochromulina	Chrysochromulina_sp.	9	2	1	1	8	2	0	0	13	9	3	0	0	6	0	0	0	0	0	1	0	0	0	0	0	0	0	0	0	0	0	0	0	0	0	0	0	0	0	0	0	0	0	0
X1136	Prymnesiophyceae	Prymnesiales	Chrysochromulinaceae	Chrysochromulina	Chrysochromulina_sp.	0	0	0	0	0	0	0	0	0	0	0	0	0	0	0	0	0	0	0	0	0	0	0	0	0	0	0	0	0	0	0	0	0	0	0	0	0	0	0	0	0	0	0	0
X131	Prymnesiophyceae	Prymnesiales	Chrysochromulinaceae	Chrysochromulina	Chrysochromulina_sp.	135	72	7	17	70	28	35	22	49	25	3	0	0	19	1	1	0	0	0	15	2	2	16	0	0	0	0	0	0	1	0	0	0	1	1	0	0	0	1	0	0	0	0	0
X1330	Prymnesiophyceae	Prymnesiales	Chrysochromulinaceae	Chrysochromulina	Chrysochromulina_sp.	0	0	0	0	2	0	0	0	0	1	0	0	0	0	0	0	0	0	0	0	0	0	0	0	0	0	0	0	0	0	0	0	0	0	0	0	0	0	0	0	0	0	0	0
X1485	Prymnesiophyceae	Prymnesiales	Chrysochromulinaceae	Chrysochromulina	Chrysochromulina_sp.	6	2	0	0	4	0	0	1	1	1	0	0	0	0	0	0	0	0	0	0	0	0	0	0	0	0	0	0	0	0	0	0	0	0	0	0	0	0	0	0	0	0	0	0
X1568	Prymnesiophyceae	Prymnesiales	Chrysochromulinaceae	Chrysochromulina	Chrysochromulina_sp.	6	1	0	0	1	0	3	0	1	0	0	0	0	0	0	0	0	0	0	0	0	0	0	0	0	0	0	0	0	0	0	0	0	0	0	0	0	0	0	0	0	0	0	0
X1986	Prymnesiophyceae	Prymnesiales	Chrysochromulinaceae	Chrysochromulina	Chrysochromulina_sp.	1	1	0	0	2	0	1	1	0	0	0	0	0	0	0	0	0	0	0	0	0	0	0	0	0	0	0	0	0	0	0	0	0	0	0	0	0	0	0	0	0	0	0	0
X372	Prymnesiophyceae	Prymnesiales	Chrysochromulinaceae	Chrysochromulina	Chrysochromulina_sp.	8	7	1	0	4	1	0	6	3	4	3	0	1	1	0	0	0	0	0	1	1	0	3	0	0	0	0	0	0	0	0	0	0	0	0	1	0	0	0	0	0	0	0	0
X387	Prymnesiophyceae	Prymnesiales	Chrysochromulinaceae	Chrysochromulina	Chrysochromulina_sp.	18	6	0	2	9	2	2	6	1	3	1	0	0	0	0	0	0	0	0	3	0	0	0	0	0	0	0	0	0	0	0	0	0	0	0	0	0	0	0	0	0	0	0	0
X388	Prymnesiophyceae	Prymnesiales	Chrysochromulinaceae	Chrysochromulina	Chrysochromulina_sp.	36	22	1	2	17	4	6	2	6	3	2	0	0	8	0	0	0	0	1	6	2	0	0	0	0	0	0	0	0	0	0	0	0	0	0	2	0	0	0	0	0	0	0	0
X598	Prymnesiophyceae	Prymnesiales	Chrysochromulinaceae	Chrysochromulina	Chrysochromulina_sp.	3	2	0	0	1	0	2	0	0	0	0	0	0	0	0	0	0	0	0	0	0	0	0	0	0	0	0	0	0	0	1	0	0	0	0	0	0	0	0	0	0	0	0	0
X688	Prymnesiophyceae	Prymnesiales	Chrysochromulinaceae	Chrysochromulina	Chrysochromulina_sp.	22	8	0	1	5	3	6	3	5	2	1	0	0	0	0	0	0	0	0	1	0	0	2	1	0	0	0	0	0	0	0	0	0	0	0	0	0	0	0	0	0	0	0	0
X835	Prymnesiophyceae	Prymnesiales	Chrysochromulinaceae	Chrysochromulina	Chrysochromulina_sp.	23	6	1	1	4	0	4	0	2	2	0	0	0	0	0	0	0	0	0	0	0	0	0	0	0	0	0	0	0	0	0	0	0	0	0	0	0	0	0	0	0	0	0	0
X1541	Prymnesiophyceae	Prymnesiales	Chrysochromulinaceae	Chrysochromulina	Chrysochromulina_throndsenii	0	0	0	0	0	0	0	0	0	0	0	0	0	0	0	0	0	0	0	0	0	0	0	0	0	0	0	0	0	0	0	0	0	0	0	0	0	0	0	0	0	0	0	0
X295	Prymnesiophyceae	Prymnesiales	Chrysochromulinaceae	Chrysochromulina	Chrysochromulina_throndsenii	2	0	0	0	1	0	0	1	0	1	0	1	0	0	0	0	0	0	0	0	0	0	0	0	0	0	0	0	0	0	0	0	0	0	0	0	0	0	0	0	2	0	0	0
X967	Chrysophyceae	Chrysophyceae_X	Chrysophyceae_Clade-F	Chrysophyceae_Clade-F_X	Chrysophyceae_Clade-F_X_sp.	0	0	0	0	0	0	0	0	0	0	0	0	0	0	0	0	0	0	0	0	0	0	0	0	0	0	0	0	0	0	0	0	0	0	0	0	0	0	0	0	0	0	0	0
X1689	Chrysophyceae	Chrysophyceae_X	Chrysophyceae_Clade-G	Chrysophyceae_Clade-G_X	Chrysophyceae_Clade-G_X_sp.	0	0	0	0	1	1	0	0	0	0	0	0	0	0	0	0	0	0	0	0	0	0	0	0	0	0	0	0	0	0	0	0	0	0	0	0	0	0	0	0	0	0	0	0
X971	Chrysophyceae	Chrysophyceae_X	Chrysophyceae_Clade-G	Chrysophyceae_Clade-G_X	Chrysophyceae_Clade-G_X_sp.	11	1	0	4	4	2	2	1	1	1	0	0	0	0	0	0	0	0	0	3	0	0	0	0	1	0	0	0	0	0	0	0	0	1	0	0	1	0	0	0	0	0	0	0
X1192	Chrysophyceae	Chrysophyceae_X	Chrysophyceae_Clade-H	Chrysophyceae_Clade-H_X	Chrysophyceae_Clade-H_X_sp.	2	0	0	1	4	0	1	0	0	2	0	0	0	0	0	0	0	0	0	0	0	0	0	0	0	0	0	0	0	0	1	0	0	0	0	0	0	0	0	0	0	0	0	0
X1218	Chrysophyceae	Chrysophyceae_X	Chrysophyceae_Clade-H	Chrysophyceae_Clade-H_X	Chrysophyceae_Clade-H_X_sp.	0	3	0	0	0	1	0	0	0	0	0	0	0	0	0	0	0	0	0	0	0	0	0	0	0	0	0	0	0	0	0	0	0	0	0	0	0	0	0	0	0	0	0	0
X1307	Chrysophyceae	Chrysophyceae_X	Chrysophyceae_Clade-H	Chrysophyceae_Clade-H_X	Chrysophyceae_Clade-H_X_sp.	0	2	0	0	2	0	1	0	2	1	0	0	0	0	0	0	0	0	0	0	0	0	1	0	0	0	0	0	0	0	0	0	0	0	0	0	0	0	0	0	0	0	0	0
X1611	Chrysophyceae	Chrysophyceae_X	Chrysophyceae_Clade-H	Chrysophyceae_Clade-H_X	Chrysophyceae_Clade-H_X_sp.	2	0	0	0	1	0	0	0	0	0	0	0	0	0	0	0	0	0	0	0	0	0	0	0	0	0	0	0	0	0	0	0	0	0	0	0	0	0	0	0	0	0	0	0
X2368	Chrysophyceae	Chrysophyceae_X	Chrysophyceae_Clade-H	Chrysophyceae_Clade-H_X	Chrysophyceae_Clade-H_X_sp.	0	0	0	1	0	0	0	0	0	0	0	0	0	0	0	0	0	0	0	0	0	0	0	0	0	0	0	0	0	0	0	0	1	0	0	0	0	0	0	0	0	0	0	0
X3140	Chrysophyceae	Chrysophyceae_X	Chrysophyceae_Clade-H	Chrysophyceae_Clade-H_X	Chrysophyceae_Clade-H_X_sp.	0	0	0	0	0	0	0	1	0	3	0	0	0	0	0	0	0	0	0	0	0	0	0	0	0	0	0	0	0	0	0	0	0	0	0	0	0	0	0	0	0	0	0	0
X3659	Chrysophyceae	Chrysophyceae_X	Chrysophyceae_Clade-H	Chrysophyceae_Clade-H_X	Chrysophyceae_Clade-H_X_sp.	0	0	0	0	0	0	1	0	0	0	0	0	0	0	0	0	0	0	0	0	0	0	0	0	0	0	0	0	0	0	0	0	0	0	0	0	0	0	0	0	0	0	0	0
X587	Chrysophyceae	Chrysophyceae_X	Chrysophyceae_Clade-H	Chrysophyceae_Clade-H_X	Chrysophyceae_Clade-H_X_sp.	42	13	0	4	4	4	0	2	3	0	0	0	0	0	0	0	0	0	0	1	1	0	1	0	0	0	0	0	0	0	0	1	3	0	0	0	0	0	0	0	0	0	0	0
[truncated: 4,033 more rows]
[truncated: 9 more columns]

## Sheet: counts + relative abundances
total counts	2020-03-02	2020-03-03	2020-03-04	2020-03-05	2020-03-06	2020-03-09	2020-03-10	2020-03-11	2020-03-16	2020-03-17	2020-03-18	2020-03-19	2020-03-20	2020-03-23	2020-03-24	2020-03-25	2020-03-26	2020-03-27	2020-03-30	2020-03-31	2020-04-01	2020-04-02	2020-04-03	2020-04-06	2020-04-07	2020-04-08	2020-04-09	2020-04-14	2020-04-15	2020-04-16	2020-04-17	2020-04-20	2020-04-21	2020-04-22	2020-04-23	2020-04-24	2020-04-27	2020-04-28	2020-04-29	2020-04-30	2020-05-04	2020-05-05	2020-05-06	2020-05-07	2020-05-08	2020-05-11	2020-05-12	2020-05-13	2020-05-14
[truncated: 28 more rows]
[truncated: 4 more columns]

[truncated: 1 more sheets: methodology]
