# Supplementary material for: Alpha-glucans from bacterial necromass indicate an intra-population loop within the marine carbon cycle
Source: Research Square preprint supplement (doi:10.21203/rs.3.rs-3205445/v1), 2023-08-14
Supplement: Supplementary file 2 [file 81b518aa40685a43764c92a6.xlsx]

## Sheet: Information
	Table S3 Proteomics of Polaribacter sp. Hel_I_88 grown on laminarin with samples taken at 18, 24 and 48 h.
	Proteome
		SusD-like
		TonB-dependent receptor
		part of the α-glucan PUL
		proteins of the Glg pathway
		part of a different PUL
	PUL annotation	annotation specific for proteins belonging to a classic PUL (CAZymes, Regulators, SusC/D-like), generated by combining multiple CAZyme-specific annotation tools
	function	NCBI annotation
	iBAQ	intensity-based absolute quantification; i.e., peak area divided by the number of all theoretical tryptic peptides between 6 and 30 amino acids
	riBAQ [%]	relative protein abundance in % of all proteins in the same sample
	PUL	annotation-based likely target substrate of the PUL
	T1	samples taken after 18 h
	T2	samples taken after 24 h
	T3	samples taken after 48 h

## Sheet: ProteinGroups.succession
Protein IDs	Majority protein IDs	order	function	PUL annotation	PUL	Peptides	Razor + unique peptides	Unique peptides	Razor + unique peptides T1-1	Razor + unique peptides T1-2	Razor + unique peptides T1-3	Razor + unique peptides T2-1	Razor + unique peptides T2-2	Razor + unique peptides T2-3	Razor + unique peptides T3-1	Razor + unique peptides T3-2	Razor + unique peptides T3-3	Sequence coverage [%]	Mol. weight [kDa]	Intensity	Intensity T1-1	Intensity T1-2	Intensity T1-3	Intensity T2-1	Intensity T2-2	Intensity T2-3	Intensity T3-1	Intensity T3-2	Intensity T3-3	iBAQ	iBAQ T1-1	iBAQ T1-2	iBAQ T1-3	riBAQ [%] T1-1	riBAQ [%] T1-2	riBAQ [%] T1-3	# identified	mean (no 0)	SD	iBAQ T2-1	iBAQ T2-2	iBAQ T2-3	riBAQ [%] T2-1	riBAQ [%] T2-2	riBAQ [%] T2-3	# identified	mean (no 0)	SD	iBAQ T3-1
P161_RS0100005	P161_RS0100005	1	hypothetical protein			8	8	8	7	6	1	1	1	1	1	3	1	41.8	21.082	28632000	10373000	15997000	404090	316740	123930	297260	565950	359970	193750	2602900	943040	1454300	36735	0.00372576	0.00293367	8.41114e-05	3	0.00224784	0.00156379	28795	11266	27023	5.50179e-05	2.35857e-05	6.30782e-05	3	4.72273e-05	1.70379e-05	51450
P161_RS0100010	P161_RS0100010	2	glyceraldehyde-3-phosphate dehydrogenase			24	24	24	19	23	23	11	9	11	10	12	12	53.3	53.267	1060200000	52876000	182010000	167120000	118950000	67767000	54876000	161650000	202450000	52535000	42410000	2115000	7280400	6685000	0.00835593	0.0146863	0.0153065	3	0.0127829	0.00314057	4758000	2710700	2195000	0.00909099	0.00567494	0.00512366	3	0.00662986	0.00175477	6466000
P161_RS0100015	P161_RS0100015	3	trypsin-like serine protease			18	18	18	10	12	14	8	11	9	7	7	6	49.5	50.084	450270000	49667000	100130000	127460000	70413000	21869000	52464000	7904800	15423000	4941000	25015000	2759300	5562900	7080900	0.0109014	0.0112217	0.016213	3	0.0127787	0.00243193	3911800	1214900	2914700	0.00747418	0.00254343	0.00680361	3	0.00560707	0.00218355	439160
P161_RS0100020	P161_RS0100020	4	diaminopimelate epimerase			7	7	7	4	5	0	3	2	0	3	3	3	36.7	28.716	51314000	19211000	24948000	0	1887400	645090	0	1792500	1861300	968360	3947200	1477800	1919100	0	0.00583848	0.00387128	0	2	0.00485488	0.00242543	145190	49622	0	0.000277411	0.000103885	0	2	0.000190648	0.000114436	137890
P161_RS0100025	P161_RS0100025	5	GNAT family N-acetyltransferase			3	3	3	2	2	0	0	0	0	0	0	0	19	20.47	4842100	2574000	2268100	0	0	0	0	0	0	0	807010	428990	378020	0	0.00169485	0.000762556	0	2	0.0012287	0.000693076	0	0	0	0	0	0	0	0	0	0
P161_RS0100030	P161_RS0100030	6	endolytic transglycosylase MltG			17	17	17	14	15	8	3	2	4	4	3	3	51.3	38.792	304440000	49834000	186460000	53541000	2885800	2292300	3564900	1597400	1755600	2511100	16914000	2768600	10359000	2974500	0.0109382	0.0208966	0.00681065	3	0.0128818	0.00591249	160320	127350	198050	0.000306319	0.000266611	0.000462296	3	0.000345076	8.44578e-05	88743
P161_RS0100040	P161_RS0100040	8	SAM-dependent methyltransferase			5	5	5	3	5	0	0	0	0	0	0	0	23.5	26.047	11160000	3329300	7830800	0	0	0	0	0	0	0	1240000	369930	870090	0	0.00146152	0.00175518	0	2	0.00160835	0.000767602	0	0	0	0	0	0	0	0	0	0
P161_RS0100045	P161_RS0100045	9	low molecular weight phosphotyrosine protein phosphatase			4	4	4	3	4	0	0	0	0	0	0	1	35.1	16.92	7556400	2490600	5065800	0	0	0	0	0	0	0	839600	276730	562860	0	0.0010933	0.00113542	0	2	0.00111436	0.000525597	0	0	0	0	0	0	0	0	0	0
P161_RS0100050	P161_RS0100050	10	chromosomal replication initiator protein DnaA	ODP|DnaA		22	22	22	13	17	14	10	3	5	3	7	1	47.6	54.396	147330000	18799000	80681000	29818000	7159900	1980300	2053900	2109900	4224200	505890	4911100	626640	2689400	993940	0.00247572	0.00542516	0.00227581	3	0.00339223	0.00143981	238660	66009	68462	0.000456002	0.000138192	0.000159807	3	0.000251334	0.000144991	70330
P161_RS0100055	P161_RS0100055	11	acyl-CoA thioesterase			2	2	2	1	0	1	1	1	0	1	0	2	17.4	15.265	18067000	0	0	931170	527000	283970	0	10083000	0	6242100	4516800	0	0	232790	0	0	0.000533015	1	0	0	131750	70993	0	0.000251731	0.000148626	0	2	0.000200179	0.000103328	2520800
P161_RS0100060	P161_RS0100060	12	peptide chain release factor N(5)-glutamine methyltransferase			3	3	3	2	3	0	0	0	0	0	0	0	12.5	33.744	10217000	2633300	7583800	0	0	0	0	0	0	0	785930	202560	583370	0	0.000800273	0.0011768	0	2	0.000988534	0.000490697	0	0	0	0	0	0	0	0	0	0
P161_RS0100065	P161_RS0100065	13	cardiolipin synthase			9	9	9	5	7	5	2	3	2	2	3	2	21.1	55.043	42009000	2441900	7077000	6895000	3106000	5167800	5695600	6066900	5309600	249550	2000400	116280	337000	328330	0.000459398	0.000679809	0.000751771	3	0.000630326	0.000124383	147900	246090	271220	0.000282589	0.000515198	0.000633093	3	0.00047696	0.000145625	288900
P161_RS0100070	P161_RS0100070	14	GNAT family N-acetyltransferase			10	10	10	7	7	4	5	2	2	4	1	3	58.5	18.533	92744000	8209900	15151000	4882300	24284000	840610	238240	1830400	23644000	13664000	6624600	586420	1082200	348740	0.00231682	0.00218305	0.000798503	3	0.00176613	0.000686389	1734600	60044	17017	0.00331426	0.000125704	3.97218e-05	3	0.00115989	0.00152377	130740
P161_RS0100080	P161_RS0100080	16	bifunctional diaminohydroxyphosphoribosylaminopyrimidine deaminase/5-amino-6-(5-phosphoribosylamino)uracil reductase RibD			6	6	6	4	5	1	1	0	1	2	3	2	20.6	38.776	8648000	1721600	3049400	973460	408730	0	319610	814510	1045400	315230	508700	101270	179380	57262	0.000400097	0.000361852	0.000131112	3	0.000297687	0.000118817	24043	0	18801	4.59384e-05	0	4.38861e-05	2	4.49122e-05	2.11884e-05	47912
P161_RS0100085	P161_RS0100085	17	HAD-IA family hydrolase			8	8	8	3	8	0	1	2	3	1	3	1	43.6	23.865	186760000	13236000	130840000	0	2065200	227500	146720	13463000	26586000	193770	15563000	1103000	10903000	0	0.00435772	0.0219939	0	2	0.0131758	0.00950882	172100	18959	12227	0.000328827	3.96913e-05	2.85408e-05	3	0.000132353	0.000139003	1121900
P161_RS0100100	P161_RS0100100	20	hypothetical protein			4	4	4	4	3	1	1	1	0	0	0	1	34.6	15.737	8731000	4920600	3219200	186200	0	284680	0	0	0	120270	1091400	615070	402400	23275	0.00243001	0.000811736	5.32923e-05	3	0.00109835	0.000991232	0	35585	0	0	7.44984e-05	0	1	0	0	0
P161_RS0100115	P161_RS0100115	23	fasciclin domain-containing protein			7	7	7	6	7	5	4	4	4	4	0	4	58.4	18.948	1047800000	158070000	161930000	187210000	142370000	92468000	54904000	130430000	0	120470000	130980000	19759000	20241000	23401000	0.0780637	0.0408309	0.0535808	3	0.0574918	0.0154498	17796000	11559000	6863000	0.0340024	0.0241992	0.0160199	3	0.0247405	0.00735129	16303000
P161_RS0100120	P161_RS0100120	24	DUF481 domain-containing protein			3	3	3	2	2	0	0	0	0	0	0	0	16.3	29.833	4114600	383990	3730600	0	0	0	0	0	0	0	342880	31999	310880	0	0.000126421	0.000627118	0	2	0.00037677	0.000270793	0	0	0	0	0	0	0	0	0	0
P161_RS0100145	P161_RS0100145	29	carbamoyl-phosphate synthase large subunit			49	49	49	43	39	40	31	31	34	32	36	36	60.6	106.28	13125000000	791290000	1375000000	1457100000	1804200000	1635200000	1695200000	1187300000	1976600000	1203400000	273440000	16485000	28645000	30357000	0.0651288	0.0577837	0.0695078	3	0.0641401	0.00483713	37587000	34066000	35317000	0.0718166	0.0713183	0.0824384	3	0.0751911	0.00512864	24735000
P161_RS0100165	P161_RS0100165	34	CTP synthase			26	26	26	21	21	22	15	14	12	9	9	12	55.7	60.242	824630000	100580000	173630000	160870000	151300000	78723000	48128000	42919000	14823000	53645000	31716000	3868400	6678100	6187500	0.0152832	0.0134713	0.0141674	3	0.0143073	0.000746309	5819400	3027800	1851100	0.011119	0.0063388	0.00432091	3	0.00725957	0.00285065	1650700
P161_RS0100170	P161_RS0100170	35	membrane protein insertase YidC			25	25	25	19	20	24	14	13	15	15	13	16	34.4	71.858	2536600000	167130000	272510000	412870000	390780000	336860000	401240000	247050000	124370000	183810000	115300000	7597000	12387000	18767000	0.0300142	0.0249875	0.0429704	3	0.0326574	0.00757568	17763000	15312000	18238000	0.0339393	0.0320562	0.0425719	3	0.0361891	0.00457829	11229000
P161_RS0100180	P161_RS0100180	37	AI-2E family transporter			4	4	4	3	4	0	2	2	1	3	2	1	15.6	38.411	32761000	1370800	12874000	0	3187800	791960	1018300	9713600	2726100	1078400	4095200	171350	1609300	0	0.000676968	0.00324634	0	2	0.00196165	0.00139836	398470	98995	127280	0.000761347	0.000207249	0.000297102	3	0.000421899	0.000242812	1214200
P161_RS0100190	P161_RS0100190	39	N(4)-(beta-N-acetylglucosaminyl)-L-asparaginase			12	12	12	8	9	6	5	4	3	3	1	7	38.7	35.744	282150000	15756000	20861000	36636000	52309000	21987000	31517000	27608000	6942700	68535000	17635000	984750	1303800	2289800	0.00389054	0.00263007	0.00524291	3	0.00392118	0.00106691	3269300	1374200	1969800	0.00624657	0.00287693	0.00459799	3	0.00457383	0.00137575	1725500
P161_RS0100195	P161_RS0100195	40	glycosyl hydrolase family 92	CAZyme, single-domain, contains GH92 domain *		16	16	16	9	10	9	3	3	4	4	5	4	18.8	112.19	58481000	12487000	22053000	11239000	1136200	1320000	2452600	3679200	1668600	2445000	1299600	277500	490070	249750	0.00109634	0.000988587	0.000571848	3	0.000885593	0.000226171	25248	29334	54502	4.82407e-05	6.14117e-05	0.000127221	3	7.89577e-05	3.45481e-05	81760
P161_RS0100200	P161_RS0100200	41	family 20 glycosylhydrolase	CAZyme, single-domain, contains GH92 domain *		9	9	9	6	3	4	1	1	0	0	0	0	13.3	90.024	39139000	30071000	5267300	3800200	0	0	0	0	0	0	850840	653720	114510	82613	0.00258271	0.000230994	0.000189157	3	0.00100095	0.0011186	0	0	0	0	0	0	0	0	0	0
P161_RS0100205	P161_RS0100205	42	copper homeostasis protein CutC			6	6	6	1	4	0	2	1	1	1	0	0	21	25.783	2001800	0	1141900	0	422650	165390	271830	0	0	0	125110	0	71369	0	0	0.000143968	0	1	0	0	26416	10337	16990	5.04724e-05	2.16409e-05	3.96587e-05	3	3.72573e-05	1.18923e-05	0
P161_RS0100210	P161_RS0100210	43	glycoside hydrolase family 2 protein	CAZyme, single-domain, contains GH2 domain		10	10	10	2	5	6	0	2	0	2	0	1	15.5	96.607	11820000	1781200	6430600	2829400	0	578650	0	0	0	200550	236410	35625	128610	56588	0.000140747	0.000259437	0.000129568	3	0.000176584	5.87632e-05	0	11573	0	0	2.42285e-05	0	1	0	0	0
P161_RS0100215	P161_RS0100215	44	glycosyltransferase	CAZyme, single-domain, contains GT2 domain		3	3	3	3	2	0	0	0	0	0	0	0	14.6	35.958	5408400	2512100	2896300	0	0	0	0	0	0	0	386310	179440	206880	0	0.00070893	0.000417326	0	2	0.000563128	0.000290933	0	0	0	0	0	0	0	0	0	0
P161_RS0100220	P161_RS0100220	45	hypothetical protein			9	9	9	6	4	5	2	2	0	3	0	2	81.2	16.842	86357000	24872000	14259000	18540000	3427100	9697300	0	13908000	0	1652800	8635700	2487200	1425900	1854000	0.00982641	0.00287638	0.00424507	3	0.00564929	0.00300606	342710	969730	0	0.000654808	0.00203016	0	2	0.00134248	0.000846032	1390800
P161_RS0100225	P161_RS0100225	46	SDR family oxidoreductase			15	15	15	13	13	3	11	9	8	10	9	8	60.1	29.644	2796200000	235500000	506690000	224030000	300520000	112510000	142390000	537700000	520870000	216030000	164480000	13853000	29805000	13178000	0.0547303	0.0601237	0.0301734	3	0.0483425	0.0130348	17678000	6618100	8376000	0.0337769	0.0138552	0.0195516	3	0.0223946	0.00837777	31630000
P161_RS0100230	P161_RS0100230	47	DNA repair protein RecN			31	31	31	27	26	24	7	4	4	7	6	9	45.7	61.94	173750000	41446000	63954000	36243000	10653000	3818500	3306200	4546900	4563300	5215100	5265000	1255900	1938000	1098300	0.0049618	0.0039094	0.00251476	3	0.00379532	0.00100225	322830	115710	100190	0.000616823	0.000242243	0.000233868	3	0.000364311	0.000178586	137790
P161_RS0100235	P161_RS0100235	48	YkgJ family cysteine cluster protein			2	2	2	0	0	1	0	0	0	0	0	1	11.5	20.221	246540	0	0	144110	0	0	0	0	0	102430	27393	0	0	16012	0	0	3.66624e-05	1	0	0	0	0	0	0	0	0	0	0	0	0
P161_RS0100240	P161_RS0100240	49	ATP-binding protein	OCS|FeoC		4	4	4	3	2	0	0	0	0	0	0	0	10	44.795	2547300	1607700	939610	0	0	0	0	0	0	0	127370	80386	46981	0	0.000317588	9.47718e-05	0	2	0.00020618	0.000133121	0	0	0	0	0	0	0	0	0	0
P161_RS0100245	P161_RS0100245	50	arginine--tRNA ligase			33	33	33	26	26	29	10	10	11	12	8	13	55	66.939	771150000	108160000	130160000	146770000	29449000	112540000	14982000	123720000	31191000	74178000	22681000	3181300	3828200	4316800	0.0125687	0.00772238	0.00988409	3	0.0100584	0.00198232	866150	3309900	440660	0.00165493	0.00692939	0.00102861	3	0.00320431	0.00264641	3638700
P161_RS0100250	P161_RS0100250	51	dihydrolipoyl dehydrogenase			41	41	41	32	37	37	34	31	33	28	27	25	83.1	49.4	15559000000	285450000	1298100000	1523400000	2542300000	3158400000	2354500000	2064200000	1830600000	502300000	707240000	12975000	59006000	69245000	0.0512615	0.119029	0.158549	3	0.109613	0.044303	115560000	143560000	107020000	0.220798	0.300548	0.24981	3	0.257052	0.032958	93829000
P161_RS0100255	P161_RS0100255	52	hypothetical protein			7	7	7	7	6	5	1	1	2	0	0	0	20.3	44.127	34184000	9326500	19205000	4660600	0	0	992270	0	0	0	1627800	444120	914530	221930	0.00175463	0.00184482	0.000508149	3	0.0013692	0.000609967	0	0	47251	0	0	0.000110295	1	0	0	0
P161_RS17820	P161_RS17820	53	glycosyltransferase	CAZyme, multi-domain, contains two GT2 domains *		6	6	6	2	4	5	3	3	2	1	1	0	17.4	54.86	176060000	6760100	55350000	68156000	8075600	26180000	2570900	8393800	576860	0	8803100	338010	2767500	3407800	0.00133541	0.0055827	0.00780277	3	0.00490696	0.00268318	403780	1309000	128550	0.000771492	0.00274044	0.000300067	3	0.00127066	0.00105695	419690
P161_RS0100265	P161_RS0100265	54	tetratricopeptide repeat protein			54	54	54	45	44	39	15	17	16	15	21	12	57.6	111.26	1468900000	196370000	323310000	254550000	132260000	177440000	154070000	90657000	76537000	63738000	29978000	4007600	6598100	5195000	0.0158332	0.0133099	0.0118949	3	0.0136793	0.00162889	2699200	3621200	3144300	0.00515729	0.0075811	0.00733955	3	0.00669265	0.00109013	1850100
P161_RS0100270	P161_RS0100270	55	DUF4838 domain-containing protein	CAZyme, single-domain, contains GH163 domain		38	38	38	30	29	28	9	15	11	12	10	16	53.2	84.805	997290000	87493000	198370000	198210000	24453000	187580000	15632000	107840000	44904000	132810000	24932000	2187300	4959300	4955200	0.00864157	0.0100041	0.0113458	3	0.00999716	0.00110402	611310	4689600	390800	0.00116801	0.00981783	0.000912221	3	0.00396602	0.00413917	2695900
P161_RS0100275	P161_RS0100275	56	DUF1573 domain-containing protein			6	6	6	4	5	2	1	1	2	1	1	1	39.9	20	42661000	21157000	15870000	2558500	1042700	768580	647200	140310	155080	321790	3878300	1923300	1442800	232590	0.00759856	0.00291047	0.000532557	3	0.00368053	0.00293563	94788	69871	58837	0.000181109	0.000146277	0.00013734	3	0.000154909	1.88824e-05	12755
P161_RS0100280	P161_RS0100280	57	LysM peptidoglycan-binding domain-containing protein	CAZyme, single-domain, contains CBM50 domain		8	8	8	8	4	1	1	1	0	2	1	1	62.9	13.732	83757000	64977000	9029200	265310	2386700	922510	0	3249800	0	2927100	10470000	8122100	1128700	33163	0.0320887	0.00227685	7.59327e-05	3	0.0114805	0.0145999	298340	115310	0	0.000570031	0.000241405	0	2	0.000405718	0.00023362	406230
P161_RS0100295	P161_RS0100295	59	23S rRNA (adenine(1618)-N(6))-methyltransferase RlmF			7	7	7	3	4	0	4	3	3	4	3	1	25.2	32.622	14145000	1747100	4160300	0	2577700	820810	1328800	1715900	1556700	237670	832060	102770	244720	0	0.000406023	0.000493658	0	2	0.000449841	0.000215054	151630	48283	78164	0.000289716	0.000101082	0.000182454	3	0.000191084	7.72508e-05	100930
P161_RS0100300	P161_RS0100300	60	bacillithiol biosynthesis cysteine-adding enzyme BshC			20	20	20	19	15	13	6	7	3	3	3	3	38.5	62.14	129690000	22572000	33923000	32321000	9182600	22415000	3592100	4094700	1042700	547010	3814400	663890	997730	950620	0.00262289	0.00201266	0.00217662	3	0.00227072	0.000257861	270080	659270	105650	0.000516035	0.0013802	0.000246612	3	0.000714284	0.000483552	120430
P161_RS0100305	P161_RS0100305	61	zinc carboxypeptidase			45	45	45	34	32	31	26	23	24	21	25	26	56.1	93.714	4481400000	286720000	402660000	502410000	604590000	610030000	490440000	623320000	486140000	475090000	109300000	6993100	9821100	12254000	0.0276283	0.0198115	0.0280577	3	0.0251658	0.00379016	14746000	14879000	11962000	0.0281748	0.0311497	0.0279222	3	0.0290822	0.00146554	15203000
P161_RS0100310	P161_RS0100310	62	30S ribosomal protein S12 methylthiotransferase RimO			10	10	10	5	10	8	2	3	1	4	1	2	27.3	51.65	73188000	3975800	27153000	21980000	5247200	3690700	0	10141000	417440	582850	2613900	141990	969750	785020	0.000560973	0.00195621	0.00179745	3	0.00143821	0.000623678	187400	131810	0	0.000358061	0.000275949	0	2	0.000317005	0.000153151	362170
P161_RS0100315	P161_RS0100315	63	amidase			18	18	18	11	15	14	11	7	8	7	8	8	31.9	61.259	1584600000	88718000	207960000	171810000	443390000	115140000	82169000	163010000	126320000	186070000	72027000	4032600	9452700	7809500	0.015932	0.0190683	0.0178813	3	0.0176272	0.00129296	20154000	5233800	3735000	0.0385078	0.0109571	0.00871839	3	0.0193944	0.013546	7409400
P161_RS0100330	P161_RS0100330	65	signal recognition particle-docking protein FtsY			24	24	24	18	18	18	15	14	10	13	11	7	78.7	35.135	4429300000	133220000	378830000	474340000	734170000	736260000	360470000	762640000	576550000	272760000	276830000	8326400	23677000	29646000	0.0328959	0.0477621	0.0678799	3	0.0495126	0.0143357	45886000	46016000	22529000	0.0876732	0.096336	0.0525881	3	0.0788658	0.0189147	47665000
P161_RS0100340	P161_RS0100340	67	50S ribosomal protein L33			3	3	3	1	3	2	0	1	0	1	1	2	41.7	6.9852	128090000	2027300	14824000	5228200	0	1010100	0	54525000	148390	50328000	128090000	2027300	14824000	5228200	0.00800944	0.0299035	0.0119709	3	0.016628	0.00952553	0	1010100	0	0	0.00211468	0	1	0	0	54525000
P161_RS0100345	P161_RS0100345	68	50S ribosomal protein L28			14	14	14	9	13	8	8	8	7	8	4	9	86.1	8.8173	1951000000	140870000	391390000	778330000	151330000	80886000	86656000	248090000	22224000	51211000	278710000	20124000	55913000	111190000	0.0795058	0.11279	0.25459	3	0.148962	0.0759162	21619000	11555000	12379000	0.0413069	0.0241908	0.0288956	3	0.0314644	0.00721986	35442000
P161_RS0100350	P161_RS0100350	69	competence/damage-inducible protein A			13	13	13	9	9	10	5	6	6	4	7	8	37.9	45.796	325240000	36044000	78089000	57017000	24110000	5069800	28737000	18691000	53266000	24218000	15488000	1716400	3718500	2715100	0.00678114	0.00750109	0.00621671	3	0.00683298	0.000525627	1148100	241420	1368400	0.00219365	0.000505421	0.00319417	3	0.00196441	0.00110958	890030
P161_RS0100370	P161_RS0100370	72	fumarylacetoacetate hydrolase family protein			9	9	9	7	7	4	6	6	4	5	6	4	54.5	22.985	995760000	22858000	96677000	136440000	73312000	214950000	47309000	86230000	250650000	67335000	82980000	1904800	8056400	11370000	0.00752547	0.0162517	0.0260337	3	0.0166036	0.00756004	6109400	17912000	3942400	0.0116731	0.0374994	0.00920251	3	0.0194583	0.0127968	7185900
P161_RS0100375	P161_RS0100375	73	formyltetrahydrofolate deformylase			12	12	12	9	11	2	2	3	5	5	4	3	43.6	32.928	93485000	12833000	48070000	2418800	1915700	2295000	17995000	4779800	2422300	755350	5193600	712960	2670600	134380	0.00281676	0.00538723	0.000307687	3	0.00283723	0.00207377	106430	127500	999710	0.000203353	0.000266925	0.00233356	3	0.000934614	0.000989547	265550
P161_RS0100380	P161_RS0100380	74	1,4-dihydroxy-2-naphthoyl-CoA synthase			12	12	12	10	11	2	6	4	5	4	4	5	53	31.146	502750000	43879000	115520000	810910	55710000	12279000	110530000	15573000	6744000	141700000	45704000	3989000	10502000	73719	0.0157597	0.021185	0.000168793	3	0.0123712	0.00890813	5064600	1116200	10049000	0.00967681	0.0023368	0.0234568	3	0.0118235	0.00875479	1415800
P161_RS0100385	P161_RS0100385	75	hypothetical protein	*		14	14	14	14	8	7	7	4	6	1	3	3	40.8	44.161	182920000	70164000	34804000	21152000	8728800	6392500	19952000	0	18810000	2917800	10162000	3898000	1933600	1175100	0.0154002	0.00390053	0.0026906	3	0.00733044	0.00572751	484930	355140	1108400	0.000926544	0.000743497	0.00258727	3	0.0014191	0.000829393	0
P161_RS0100390	P161_RS0100390	76	hypothetical protein			3	3	3	2	3	0	2	2	2	2	1	2	17.5	25.496	143770000	282760	7242200	0	995530	29003000	23111000	37723000	647250	44762000	17971000	35345	905280	0	0.000139641	0.00182616	0	2	0.000982902	0.000829909	124440	3625300	2888800	0.000237764	0.00758969	0.00674315	3	0.00485687	0.00328443	4715300
P161_RS0100395	P161_RS0100395	77	hypothetical protein			4	4	4	2	2	2	1	0	0	1	0	0	22	19.182	71263000	5553600	25267000	35217000	143750	0	0	5081600	0	0	10180000	793380	3609500	5031000	0.00313448	0.00728121	0.0115194	3	0.00731169	0.00342319	20536	0	0	3.92376e-05	0	0	1	0	0	725940
P161_RS0100400	P161_RS0100400	78	2-succinyl-5-enolpyruvyl-6-hydroxy-3-cyclohexene-1-carboxylic-acid synthase			9	9	9	2	6	5	5	4	3	1	2	2	21.1	62.833	61078000	1599100	10514000	12086000	11591000	12041000	5514000	1106800	5479900	1146600	2349100	61503	404380	464830	0.000242986	0.00081573	0.00106431	3	0.000707676	0.0003439	445800	463120	212080	0.000851779	0.000969557	0.000495046	3	0.000772127	0.00020174	42569
P161_RS0100405	P161_RS0100405	79	fructose-6-phosphate aldolase			19	19	19	10	16	6	9	8	8	11	9	8	83.9	23.332	5407700000	490510000	1255100000	210920000	543330000	558380000	706510000	835210000	462460000	345220000	450640000	40876000	104590000	17576000	0.161493	0.210983	0.0402434	3	0.137573	0.0717268	45277000	46532000	58876000	0.0865096	0.0974163	0.137431	3	0.107119	0.0218913	69601000
P161_RS0100410	P161_RS0100410	80	hypothetical protein			6	6	6	6	6	4	1	2	1	1	2	1	22.8	39.097	42897000	4863800	19506000	12468000	1783200	1829300	1905000	0	365570	176780	2383200	270210	1083600	692650	0.00106754	0.00218588	0.00158595	3	0.00161312	0.000456962	99066	101630	105830	0.000189283	0.000212766	0.000247033	3	0.00021636	2.37128e-05	0
P161_RS0100415	P161_RS0100415	81	SDR family oxidoreductase			13	13	13	6	10	0	5	4	5	5	5	7	53.6	29.533	196570000	10258000	43870000	0	12927000	5010000	12129000	50856000	12620000	48902000	11563000	603380	2580600	0	0.00238383	0.00520568	0	2	0.00379475	0.00212772	760390	294700	713450	0.00145286	0.000616964	0.00166536	3	0.00124506	0.000452526	2991500
P161_RS0100420	P161_RS0100420	83	nucleoside triphosphate pyrophosphohydrolase			10	10	10	9	6	0	1	1	0	0	0	0	33.6	30.019	69867000	15401000	53672000	0	257220	538040	0	0	0	0	4657800	1026700	3578100	0	0.00405628	0.00721787	0	2	0.00563708	0.00295422	17148	35869	0	3.27643e-05	7.50929e-05	0	2	5.39286e-05	3.07393e-05	0
P161_RS0100425	P161_RS0100425	84	DUF5606 domain-containg protein			12	12	12	7	9	8	7	7	4	6	0	7	96.5	15.946	2372700000	302190000	391080000	415120000	294940000	351100000	171970000	252260000	0	194090000	338960000	43170000	55869000	59302000	0.170556	0.112701	0.135783	3	0.13968	0.0237793	42134000	50157000	24567000	0.0805044	0.105005	0.0573453	3	0.0809517	0.0194597	36037000
P161_RS0100430	P161_RS0100430	85	peptide deformylase			9	9	9	8	9	1	2	2	1	0	0	0	58.2	22.539	218590000	50809000	164230000	433290	102700	720950	2291900	0	0	0	24288000	5645400	18248000	48143	0.0223038	0.0368105	0.000110232	3	0.0197415	0.015092	11411	80105	254650	2.18027e-05	0.000167702	0.000594414	3	0.000261306	0.000242957	0
P161_RS0100435	P161_RS0100435	86	Holliday junction resolvase RuvX			3	3	3	1	2	3	0	0	0	0	0	0	20.4	15.362	5812100	1750700	2495700	1565700	0	0	0	0	0	0	726510	218840	311970	195710	0.000864591	0.000629317	0.000448113	3	0.000647341	0.000170503	0	0	0	0	0	0	0	0	0	0
P161_RS0100440	P161_RS0100440	87	2,3,4,5-tetrahydropyridine-2,6-dicarboxylate N-succinyltransferase			25	25	25	20	20	8	17	18	15	17	16	17	76	29.555	10760000000	212920000	626910000	47663000	2138500000	863660000	1272400000	1912400000	2292300000	1393300000	827700000	16378000	48224000	3666400	0.0647061	0.0972792	0.00839488	3	0.0567934	0.0367157	164500000	66436000	97876000	0.314306	0.139086	0.228466	3	0.227286	0.0715382	147110000
P161_RS0100445	P161_RS0100445	88	glycosyltransferase family 2 protein	CAZyme, single-domain, contains GT2 domain		8	8	8	5	7	0	2	1	0	3	3	1	33.7	29.302	70049000	19115000	26879000	0	665970	0	0	12353000	10755000	280800	4378000	1194700	1679900	0	0.00472001	0.00338876	0	2	0.00405438	0.00198703	41623	0	0	7.9528e-05	0	0	1	0	0	772070
P161_RS0100450	P161_RS0100450	89	glycosyltransferase family 25 protein	CAZyme, single-domain, contains GT25 domain		7	7	7	5	6	0	1	0	0	2	1	1	26.5	29.861	14909000	2728500	11229000	0	328260	0	0	120470	502300	0	828270	151590	623850	0	0.000598901	0.00125845	0	2	0.000928677	0.00051396	18237	0	0	3.4845e-05	0	0	1	0	0	6692.8
P161_RS0100455	P161_RS0100455	90	alpha-1,2-fucosyltransferase	CAZyme, single-domain, contains GT11 domain		9	9	9	5	4	1	2	0	1	2	2	1	40.4	31.137	172060000	18446000	13567000	1280100	31827000	0	7552500	44388000	48997000	6007500	14339000	1537200	1130600	106670	0.00607316	0.00228069	0.00024424	3	0.00286603	0.00241537	2652300	0	629380	0.00506768	0	0.00146912	2	0.0032684	0.00212889	3699000
P161_RS0100460	P161_RS0100460	91	HD domain-containing protein			21	21	21	9	14	14	6	5	6	7	5	4	46.2	53.607	715020000	21972000	131250000	143680000	71113000	90698000	68460000	96296000	67130000	24428000	31088000	955290	5706400	6246900	0.00377415	0.0115112	0.0143034	3	0.00986291	0.00445375	3091900	3943400	2976500	0.00590762	0.00825564	0.00694787	3	0.00703704	0.000960648	4186800
P161_RS0100465	P161_RS0100465	92	pyruvate carboxylase			61	61	61	48	47	43	28	25	26	35	35	32	58.7	129.46	4606700000	211410000	417590000	356420000	561440000	346590000	557890000	607210000	859780000	688390000	68757000	3155300	6232700	5319700	0.0124659	0.0125728	0.0121804	3	0.0124064	0.000165643	8379700	5172900	8326800	0.0160109	0.0108296	0.0194368	3	0.0154258	0.00353811	9062900
P161_RS0100470	P161_RS0100470	93	ABC transporter ATP-binding protein			23	23	23	18	21	17	7	6	5	4	5	5	42.2	68.979	435220000	100420000	108440000	124060000	34734000	12228000	28626000	2891000	22435000	1390200	15544000	3586400	3872900	4430500	0.0141691	0.00781255	0.0101444	3	0.0107087	0.00262555	1240500	436730	1022300	0.00237019	0.000914309	0.00238629	3	0.00189027	0.000690137	103250
P161_RS0100475	P161_RS0100475	94	phospho-sugar mutase			33	33	33	27	27	24	21	17	18	22	19	19	57.1	62.987	5328200000	284170000	459430000	535110000	788610000	821310000	608720000	848660000	436360000	545860000	152230000	8119000	13126000	15289000	0.0320765	0.0264782	0.0350069	3	0.0311872	0.00353814	22532000	23466000	17392000	0.0430513	0.0491269	0.0405971	3	0.0442584	0.00358534	24247000
P161_RS0100480	P161_RS0100480	95	glycosyltransferase family 2 protein	CAZyme, single-domain, contains GT2 domain		6	6	6	4	5	2	2	1	2	2	2	1	16	36.451	29780000	3700300	17552000	452760	1928300	1384200	1587200	2072700	968280	134270	2290800	284640	1350100	34828	0.00112455	0.00272347	7.9745e-05	3	0.00130926	0.00108717	148330	106480	122090	0.00028341	0.000222919	0.000284987	3	0.000263772	2.88946e-05	159440
P161_RS0100485	P161_RS0100485	96	DUF4199 domain-containing protein			2	2	2	2	2	2	2	2	1	1	1	2	19.1	18.969	405870000	15060000	14957000	69619000	84313000	78613000	13856000	112990000	6155400	10305000	81174000	3012000	2991300	13924000	0.0118998	0.00603416	0.0318815	3	0.0166052	0.0110643	16863000	15723000	2771200	0.0322197	0.0329166	0.00646865	3	0.0238683	0.0123067	22599000
P161_RS0100495	P161_RS0100495	97	DNA polymerase III subunit beta			27	27	27	27	23	19	19	15	20	15	21	22	85.5	40.816	8930800000	872560000	913070000	1607400000	793030000	364880000	736330000	1223100000	1490300000	930200000	446540000	43628000	45654000	80369000	0.172365	0.0920949	0.184019	3	0.149493	0.0408646	39652000	18244000	36817000	0.0757621	0.0381944	0.0859397	3	0.0666321	0.0205332	61154000
P161_RS0100500	P161_RS0100500	98	PIG-L family deacetylase	CAZyme, single-domain, contains CE14 domain		49	49	49	42	37	36	21	16	16	21	27	21	57.1	93.721	1139500000	145730000	207420000	212510000	56351000	77338000	37988000	95069000	175080000	132030000	21102000	2698600	3841100	3935400	0.0106616	0.00774841	0.00901081	3	0.00914027	0.00119283	1043500	1432200	703490	0.00199379	0.00299836	0.00164211	3	0.00221142	0.000574672	1760500
P161_RS0100505	P161_RS0100505	99	sodium:solute symporter			3	3	3	2	3	0	0	0	0	0	0	0	6.1	64.234	6524600	2137100	4387500	0	0	0	0	0	0	0	434970	142470	292500	0	0.000562869	0.000590042	0	2	0.000576456	0.00027197	0	0	0	0	0	0	0	0	0	0
P161_RS0100510	P161_RS0100510	100	Gfo/Idh/MocA family oxidoreductase	*		9	9	9	6	6	8	5	3	6	2	2	2	35	36.662	92997000	9849500	18974000	26102000	10206000	8179400	11487000	3108400	4127600	964550	5470400	579380	1116100	1535400	0.00228901	0.00225144	0.00351558	3	0.00268534	0.000587265	600350	481140	675680	0.00114707	0.00100728	0.0015772	3	0.00124385	0.000242523	182850
P161_RS0100515	P161_RS0100515	101	2-hydroxyacid dehydrogenase			24	24	24	20	20	14	12	16	14	16	15	12	68.1	36.818	2856100000	176810000	533730000	94932000	217050000	447730000	367110000	389250000	378530000	250960000	142800000	8840500	26687000	4746600	0.034927	0.053834	0.0108682	3	0.0332097	0.0175827	10852000	22386000	18355000	0.0207346	0.0468658	0.042845	3	0.0368152	0.0114885	19462000
P161_RS0100520	P161_RS0100520	102	DUF2911 domain-containing protein			23	23	23	11	17	3	17	14	13	20	19	19	69.9	31.097	11083000000	83593000	725760000	84663000	1322700000	838160000	1226500000	2457100000	2708700000	1635700000	692690000	5224600	45360000	5291400	0.0206413	0.0915018	0.0121156	3	0.0414196	0.0355841	82671000	52385000	76658000	0.157957	0.10967	0.178938	3	0.148855	0.0290019	153570000
P161_RS0100525	P161_RS0100525	103	NAD(P)H-binding protein			6	6	6	6	6	0	1	1	1	1	1	1	27.2	29.186	21253000	6471800	12564000	0	418100	151600	682940	632580	254430	77913	1328300	404490	785230	0	0.00159806	0.00158399	0	2	0.00159103	0.000750039	26131	9475	42684	4.99279e-05	1.98362e-05	9.96347e-05	3	5.64663e-05	3.2904e-05	39536
P161_RS0100530	P161_RS0100530	104	VOC family protein			5	5	5	4	4	2	1	1	0	1	0	4	41.3	16.085	172340000	15774000	39649000	1395200	378070	0	0	38020000	0	77128000	21543000	1971700	4956100	174390	0.00778978	0.00999763	0.000399297	3	0.00606223	0.00410449	47259	0	0	9.02966e-05	0	0	1	0	0	4752500
P161_RS0100535	P161_RS0100535	105	S41 family peptidase	*		45	45	45	29	33	32	23	21	19	28	29	28	44.4	122.59	1340400000	53728000	85109000	106460000	98619000	80434000	38549000	287570000	411490000	178400000	22339000	895470	1418500	1774400	0.00353782	0.00286145	0.00406281	3	0.00348736	0.000491749	1643700	1340600	642480	0.00314058	0.00280659	0.0014997	3	0.00248229	0.000708047	4792900
P161_RS0100545	P161_RS0100545	107	hypothetical protein			15	15	15	10	12	9	5	7	7	7	7	6	40.7	48.865	405130000	47142000	153190000	33017000	22069000	8598200	11443000	65460000	52184000	12029000	16205000	1885700	6127600	1320700	0.00745001	0.0123608	0.00302398	3	0.0076116	0.00381346	882750	343930	457730	0.00168665	0.000720029	0.00106845	3	0.00115838	0.000399711	2618400
P161_RS0100555	P161_RS0100555	109	SAM-dependent methyltransferase			2	2	2	1	1	0	1	1	0	0	1	0	4.3	45.74	1712900	586690	905590	0	0	220610	0	0	0	0	85644	29334	45279	0	0.000115893	9.13384e-05	0	2	0.000103616	4.98628e-05	0	11030	0	0	2.30917e-05	0	1	0	0	0
P161_RS0100560	P161_RS0100560	110	formate dehydrogenase accessory sulfurtransferase FdhD			6	6	6	5	5	1	2	1	0	1	2	2	23.9	29.836	19667000	2587700	4889800	8944600	1024500	227100	0	297060	316810	1379300	1156900	152220	287630	526150	0.00060139	0.000580218	0.00120472	3	0.000795441	0.00028953	60266	13359	0	0.000115149	2.79675e-05	0	2	7.15581e-05	4.90374e-05	17474
P161_RS0100565	P161_RS0100565	111	FdhF/YdeP family oxidoreductase			19	19	19	9	9	11	6	7	4	4	6	6	25.7	84.63	63709000	5597600	8187400	20464000	4826300	3289500	1475100	7466500	6040400	6362200	1385000	121690	177990	444860	0.000480772	0.000359048	0.00101859	3	0.000619469	0.000286561	104920	71511	32068	0.000200468	0.000149711	7.48544e-05	3	0.000141678	5.15952e-05	162320
P161_RS0100570	P161_RS0100570	112	hypothetical protein			9	9	9	7	7	7	5	5	3	4	6	4	22.5	55.919	137360000	5926000	18200000	31352000	41619000	14692000	6293200	3397900	14275000	1610300	5087600	219480	674070	1161200	0.00086712	0.00135976	0.00265878	3	0.00162855	0.000755732	1541400	544140	233080	0.00294511	0.00113918	0.000544065	3	0.00154278	0.00102093	125850
P161_RS17830	P161_RS17830	113	beta-N-acetylhexosaminidase	CAZyme, single-domain, contains GH20 domain		32	32	32	22	25	21	16	14	14	14	9	12	54.3	63.64	1390700000	64493000	119940000	170910000	139860000	441180000	171440000	131690000	117450000	33707000	47954000	2223900	4135900	5893500	0.00878617	0.00834309	0.0134942	3	0.0102078	0.00233087	4822600	15213000	5911900	0.00921442	0.0318489	0.0137998	3	0.0182877	0.00977023	4540900
P161_RS0100580	P161_RS0100580	114	energy-dependent translational throttle protein EttA			45	45	45	33	30	34	19	22	23	19	17	24	72.3	63.449	3552400000	265310000	367010000	595150000	172040000	907740000	458830000	194600000	163540000	428230000	111010000	8290800	11469000	18598000	0.0327552	0.0231357	0.0425835	3	0.0328248	0.00793968	5376200	28367000	14338000	0.0102722	0.0593873	0.0334683	3	0.0343759	0.0200614	6081100
P161_RS0100590	P161_RS0100590	115	NADPH-dependent 2,4-dienoyl-CoA reductase			33	33	33	21	15	22	10	11	10	12	10	17	52.4	74.636	330940000	32159000	35480000	77102000	48414000	57315000	23117000	8016200	9521600	39816000	8071700	784360	865370	1880500	0.00309884	0.00174566	0.00430574	3	0.00305008	0.00104572	1180800	1397900	563820	0.00225613	0.00292655	0.00131609	3	0.00216626	0.000660531	195520
P161_RS0100595	P161_RS0100595	116	NAD-dependent succinate-semialdehyde dehydrogenase			30	30	30	12	18	20	16	16	14	23	24	20	71.6	50.503	3669200000	17347000	131580000	125630000	208740000	330960000	208380000	1102600000	1183700000	360370000	141120000	667180	5060900	4832000	0.00263589	0.010209	0.0110637	3	0.00796955	0.00378758	8028500	12729000	8014500	0.0153399	0.0266486	0.0187078	3	0.0202321	0.00474092	42406000
P161_RS0100600	P161_RS0100600	117	pirin family protein			6	6	6	2	5	0	3	2	2	3	3	2	31.6	26.422	15713000	1662500	6408900	0	1625500	1455500	194080	1880900	2105200	380610	924300	97795	376990	0	0.000386368	0.000760478	0	2	0.000573423	0.000310477	95616	85619	11416	0.000182691	0.000179246	2.66477e-05	3	0.000129528	7.27612e-05	110640
P161_RS0100605	P161_RS0100605	118	pirin family protein			5	5	5	4	3	0	2	1	1	2	1	1	20.8	32.427	19660000	1537500	2797100	0	1240300	106480	0	7810200	5902000	266060	1787200	139770	254280	0	0.000552202	0.000512943	0	2	0.000532573	0.000251568	112760	9680.4	0	0.000215448	2.02662e-05	0	2	0.000117857	9.71392e-05	710020
P161_RS0100620	P161_RS0100620	121	NAD(P)H-dependent oxidoreductase	*		8	8	8	5	8	3	3	3	2	3	0	5	46.9	19.741	131570000	8407900	13772000	12003000	5413500	2111400	605320	24009000	0	65248000	10964000	700660	1147700	1000200	0.00276816	0.00231518	0.00229014	3	0.00245783	0.000219678	451120	175950	50444	0.000861944	0.000368357	0.000117748	3	0.00044935	0.000309167	2000800
P161_RS0100630	P161_RS0100630	123	ATP-binding protein			26	26	26	17	22	20	7	8	6	7	7	9	47.1	72.441	422710000	41159000	102980000	65282000	13936000	61543000	7337500	42683000	50356000	37438000	12433000	1210600	3028800	1920100	0.00478283	0.00610981	0.00439642	3	0.00509635	0.000733779	409890	1810100	215810	0.000783167	0.0037895	0.000503752	3	0.00169214	0.00148744	1255400
P161_RS0100635	P161_RS0100635	124	hypothetical protein			15	15	15	10	12	12	8	5	5	5	5	6	32	65.471	91726000	5107700	15945000	17052000	16764000	4883500	13095000	4548700	12482000	1847900	2779600	154780	483190	516720	0.000611504	0.000974708	0.00118312	3	0.000923112	0.000236198	508010	147980	396810	0.000970642	0.000309801	0.00092625	3	0.000735564	0.000301605	137840
P161_RS0100645	P161_RS0100645	126	hypothetical protein			6	6	6	5	2	1	1	0	1	2	1	0	16.1	48.687	10745000	5614800	2393400	629780	409820	0	1696900	0	0	0	565510	295510	125970	33146	0.0011675	0.000254111	7.58938e-05	3	0.000499168	0.000478149	21569	0	89309	4.12114e-05	0	0.000208469	2	0.00012484	9.01434e-05	0
P161_RS0100650	P161_RS0100650	127	NUDIX domain-containing protein			6	6	6	5	5	0	1	2	2	1	2	1	31.8	22.223	21499000	4061800	13356000	0	670310	123150	791180	995490	859950	641360	1653800	312450	1027400	0	0.00123443	0.00207251	0	2	0.00165347	0.00085124	51563	9472.7	60860	9.85202e-05	1.98314e-05	0.000142062	3	8.68045e-05	5.05834e-05	76576
P161_RS0100655	P161_RS0100655	128	AAA family ATPase			28	28	28	24	23	22	9	8	7	9	8	8	46.6	75.133	290490000	51374000	100350000	83126000	13924000	20397000	6960700	6233400	4285500	3839500	7448500	1317300	2573100	2131400	0.00520438	0.00519055	0.00488023	3	0.00509172	0.000149655	357010	523000	178480	0.00068213	0.00109492	0.000416615	3	0.000731221	0.000279083	159830
P161_RS0100660	P161_RS0100660	129	hypothetical protein			12	12	12	6	9	8	0	0	0	1	1	0	40.9	40.805	28250000	3722500	14690000	8710800	0	0	0	8609	1117700	0	1228300	161850	638710	378730	0.000639436	0.00128843	0.000867171	3	0.000931679	0.000268848	0	0	0	0	0	0	0	0	0	374.3
P161_RS0100665	P161_RS0100665	130	type II toxin-antitoxin system PemK/MazF family toxin			3	3	3	2	3	1	0	0	0	0	0	1	31.8	12.503	8431000	3113500	3897900	630090	0	0	0	0	0	789460	1204400	444790	556850	90012	0.00175727	0.0011233	0.000206099	3	0.00102889	0.000636773	0	0	0	0	0	0	0	0	0	0
P161_RS0100675	P161_RS0100675	132	hypothetical protein			39	39	39	23	30	29	9	14	8	10	9	11	74.7	51.058	1704900000	186750000	398560000	362160000	141930000	179860000	27731000	227040000	36799000	144050000	58789000	6439500	13743000	12488000	0.0254411	0.0277229	0.0285935	3	0.0272525	0.00132925	4894000	6202200	956220	0.00935085	0.0129845	0.00223205	3	0.00818913	0.00446587	7829000
P161_RS0100685	P161_RS0100685	133	T9SS type B sorting domain-containing protein			36	36	20	29	32	31	17	20	18	25	19	14	32.6	163.06	2267800000	79875000	257640000	404710000	235270000	249600000	183610000	319990000	346880000	190250000	52740000	1857600	5991700	9411800	0.00733899	0.0120867	0.02155	3	0.0136586	0.00590714	5471500	5804600	4270100	0.0104543	0.0121521	0.00996744	3	0.0108579	0.000936458	7441600
P161_RS0100690	P161_RS0100690	134	translation initiation factor IF-2			63	63	63	55	53	54	33	43	34	43	36	32	63.6	105.34	17479000000	596980000	1628000000	1433800000	1717900000	3866400000	1341600000	2746100000	2291200000	1856800000	388420000	13266000	36178000	31863000	0.0524112	0.0729796	0.0729561	3	0.0661156	0.00969049	38176000	85920000	29813000	0.0729419	0.179876	0.0695907	3	0.10747	0.0512175	61024000
P161_RS0100695	P161_RS0100695	135	transcription termination/antitermination protein NusA			38	38	38	26	34	33	28	22	19	17	17	17	80.6	47.396	9624800000	602570000	1553000000	1930500000	1709200000	1237100000	1085600000	676710000	481430000	348600000	437490000	27389000	70593000	87749000	0.108208	0.142403	0.200917	3	0.150509	0.0382799	77691000	56233000	49346000	0.148442	0.117726	0.115185	3	0.127118	0.0151143	30759000
P161_RS0100700	P161_RS0100700	136	ribosome assembly cofactor RimP			3	3	3	1	1	2	1	0	0	0	0	0	35.9	17.292	16293000	1435200	1325000	2359000	11174000	0	0	0	0	0	2715500	239200	220840	393160	0.00094503	0.000445486	0.000900211	3	0.000763576	0.000225666	1862300	0	0	0.00355825	0	0	1	0	0	0
P161_RS0100705	P161_RS0100705	137	universal stress protein			10	10	10	8	9	0	4	2	1	5	4	4	45.3	31.273	650200000	9446800	172570000	0	39917000	1298500	678840	159050000	187950000	79287000	50015000	726680	13275000	0	0.00287096	0.0267788	0	2	0.0148249	0.0120043	3070500	99884	52219	0.00586673	0.00020911	0.000121892	3	0.00206591	0.00268782	12235000
P161_RS0100715	P161_RS0100715	139	TlpA family protein disulfide reductase			12	11	11	5	7	7	6	3	4	4	4	3	24	59.503	69642000	1875200	5847800	10832000	12351000	2195500	2581000	30180000	2952500	827180	2321400	62506	194930	361060	0.000246948	0.00039322	0.000826712	3	0.00048896	0.000246179	411700	73183	86034	0.000786625	0.000153211	0.000200824	3	0.00038022	0.000288028	1006000
P161_RS0100720	P161_RS0100720	140	recombination protein RecR			9	9	9	6	8	2	4	1	1	1	2	2	37.6	22.919	38344000	8415100	23679000	433140	993010	0	0	0	3167600	1656200	2949500	647310	1821400	33318	0.00255739	0.00367419	7.62876e-05	3	0.00210262	0.00150363	76385	0	0	0.000145947	0	0	1	0	0	0
P161_RS0100725	P161_RS0100725	141	sodium:solute symporter			2	2	2	2	2	1	0	0	0	0	0	0	3.8	53.7	3583800	1047600	2050000	486180	0	0	0	0	0	0	223990	65475	128130	30386	0.000258678	0.000258468	6.95742e-05	3	0.000195574	8.90951e-05	0	0	0	0	0	0	0	0	0	0
P161_RS0100735	P161_RS0100735	143	T9SS type A sorting domain-containing protein			70	70	60	51	53	50	54	48	44	33	31	35	50.5	310.11	12008000000	467550000	624110000	1132600000	2253200000	2186900000	1792700000	871190000	1039600000	1640300000	214430000	8349200	11145000	20226000	0.032986	0.0224821	0.0463111	3	0.0339264	0.00975084	40235000	39052000	32012000	0.076876	0.0817567	0.0747237	3	0.0777855	0.00294233	15557000
P161_RS0100740	P161_RS0100740	144	choice-of-anchor A family protein	*		31	27	27	13	13	13	9	6	8	9	5	5	19.3	209.33	137410000	20284000	14269000	17631000	24792000	10214000	7736300	6862500	940600	34678000	2544600	375640	264250	326500	0.00148408	0.000533055	0.000747581	3	0.00092157	0.000407279	459110	189160	143260	0.00087721	0.000396013	0.000334403	3	0.000535875	0.000242667	127080
P161_RS0100745	P161_RS0100745	145	pyridoxamine 5'-phosphate oxidase			7	7	7	5	6	2	3	2	2	2	2	2	39.5	25.063	255790000	8191600	44257000	4615800	5555500	54989000	13120000	16883000	45663000	62516000	25579000	819160	4425700	461580	0.00323633	0.00892768	0.00105687	3	0.00440696	0.00331815	555550	5498900	1312000	0.00106148	0.0115121	0.00306252	3	0.00521204	0.00452912	1688300
P161_RS0100750	P161_RS0100750	146	histidine phosphatase family protein			7	7	7	5	5	4	5	5	3	3	0	6	60.5	18.461	978340000	40121000	40366000	20540000	214400000	278950000	137970000	23778000	0	222210000	122290000	5015100	5045700	2567500	0.0198136	0.0101784	0.00587875	3	0.0119569	0.00582624	26800000	34869000	17246000	0.0512061	0.0729994	0.0402563	3	0.0548206	0.0136095	2972300
P161_RS0100755	P161_RS0100755	147	exopolyphosphatase			20	20	20	14	14	16	15	15	13	11	12	11	52.5	32.881	1445500000	29534000	130120000	88512000	122870000	310830000	125820000	287510000	300860000	49488000	85032000	1737300	7654100	5206600	0.00686371	0.0154401	0.0119215	3	0.0114084	0.00352005	7227800	18284000	7401000	0.01381	0.0382782	0.0172757	3	0.0231213	0.0108105	16912000
P161_RS0100760	P161_RS0100760	148	OmpA family protein			37	37	37	29	34	32	27	29	30	23	24	28	78.1	41.818	25142000000	743630000	1768600000	2598200000	3018300000	4163400000	2745300000	3512400000	3728200000	2863800000	1197200000	35411000	84219000	123720000	0.139902	0.16989	0.283279	3	0.19769	0.0617465	143730000	198260000	130730000	0.274621	0.415064	0.305155	3	0.331613	0.0603106	167260000
P161_RS17835	P161_RS17835	149	thioredoxin family protein			6	6	6	6	6	1	1	0	0	0	0	1	33.9	19.319	110350000	77310000	31251000	1412600	376460	0	0	0	0	0	13794000	9663700	3906300	176570	0.0381793	0.00787993	0.000404289	3	0.0154878	0.0163329	47057	0	0	8.99106e-05	0	0	1	0	0	0
P161_RS0100770	P161_RS0100770	150	tetraacyldisaccharide 4'-kinase			6	6	6	2	3	1	1	1	1	2	0	0	17.8	39.35	40490000	1134700	4237200	876440	571010	9796400	689080	23185000	0	0	2024500	56737	211860	43822	0.000224156	0.000427372	0.000100338	3	0.000250622	0.000134816	28550	489820	34454	5.45498e-05	0.00102545	8.04239e-05	3	0.000386809	0.000451714	1159300
P161_RS0100780	P161_RS0100780	152	Nif3-like dinuclear metal center hexameric protein			12	12	12	9	9	6	4	4	5	5	5	4	36.3	40.591	90739000	22049000	27319000	10883000	5680000	1817700	4420300	9707300	6355700	2508000	5337600	1297000	1607000	640150	0.00512418	0.0032417	0.00146574	3	0.00327721	0.00149376	334120	106930	260020	0.000638395	0.000223862	0.000606949	3	0.000489735	0.000188439	571020
P161_RS0100785	P161_RS0100785	153	hypothetical protein			42	42	42	32	39	6	10	18	15	15	17	15	88.7	29.44	8876300000	740350000	1671500000	6102300	859440000	1075100000	846760000	1201000000	1846000000	630130000	522140000	43550000	98324000	358960	0.172057	0.198343	0.000821904	3	0.123741	0.0875766	50555000	63239000	49809000	0.0965942	0.132393	0.116266	3	0.115084	0.0146387	70646000
P161_RS0100795	P161_RS0100795	154	DUF349 domain-containing protein			56	56	56	47	44	42	21	24	22	20	14	17	62.2	77.165	2619500000	328580000	348570000	453840000	315420000	530460000	257920000	242730000	27570000	114460000	55735000	6991000	7416400	9656100	0.02762	0.0149606	0.0221094	3	0.0215633	0.00518257	6711100	11286000	5487700	0.0128227	0.0236276	0.0128096	3	0.01642	0.00509657	5164500
P161_RS0100800	P161_RS0100800	155	shikimate dehydrogenase			13	13	13	10	12	1	7	4	0	4	4	4	49.4	28.538	165390000	22082000	75082000	5018600	16057000	1008700	0	2216300	18159000	25764000	11026000	1472100	5005500	334570	0.00581596	0.0100973	0.000766058	3	0.00555977	0.00381376	1070400	67248	0	0.00204519	0.000140786	0	2	0.00109299	0.000932699	147750
P161_RS0100805	P161_RS0100805	156	DUF368 domain-containing protein			2	2	2	0	0	0	0	0	1	0	1	1	6.5	37.662	513870	0	0	0	0	0	267350	0	246520	0	57097	0	0	0	0	0	0	0	0	0	0	0	29706	0	0	6.93409e-05	1	0	0	0
P161_RS0100810	P161_RS0100810	157	DUF368 domain-containing protein			5	5	5	4	5	1	2	2	2	2	2	1	16.3	36.811	232420000	8551700	16704000	2115500	76133000	986170	477290	42619000	84442000	394150	23242000	855170	1670400	211550	0.0033786	0.00336959	0.000484382	3	0.00241086	0.00136223	7613300	98617	47729	0.0145465	0.000206458	0.000111411	3	0.0049548	0.0067825	4261900
P161_RS0100815	P161_RS0100815	158	MBL fold metallo-hydrolase			17	17	17	13	10	11	6	7	8	7	8	4	44.4	29.714	762980000	30285000	87989000	83690000	19403000	103790000	102100000	83886000	150250000	101590000	69362000	2753100	7999000	7608200	0.0108769	0.0161359	0.0174203	3	0.014811	0.00283084	1763900	9435800	9281900	0.00337024	0.0197542	0.0216662	3	0.0149302	0.00821131	7626000
P161_RS0100820	P161_RS0100820	159	superoxide dismutase family protein			8	8	8	6	8	7	6	6	4	5	7	7	60.1	18.035	11358000000	73762000	173260000	273230000	1878700000	1415800000	1139800000	1864000000	1652800000	2887000000	1622600000	10537000	24751000	39033000	0.0416295	0.0499286	0.0893731	3	0.0603104	0.0208278	268380000	202260000	162830000	0.512787	0.423438	0.380084	3	0.43877	0.0552497	266280000
P161_RS0100825	P161_RS0100825	160	TIGR04255 family protein			13	13	13	4	11	1	7	9	5	11	10	6	57	30.725	2405100000	63355000	516320000	461140	356150000	357980000	276950000	287140000	350290000	196480000	218650000	5759600	46939000	41922	0.022755	0.0946871	9.5988e-05	3	0.0391793	0.0403252	32377000	32544000	25177000	0.0618619	0.0681319	0.0587692	3	0.062921	0.00389501	26103000
P161_RS0100830	P161_RS0100830	161	hypothetical protein			8	8	8	6	7	0	4	3	1	1	0	0	31.8	24.471	64319000	17515000	40981000	0	2163100	3076000	174170	409250	0	0	9188400	2502100	5854500	0	0.00988528	0.0118099	0	2	0.0108476	0.00517362	309020	439430	24882	0.000590437	0.000919961	5.80806e-05	3	0.000522826	0.000355094	58464
P161_RS0100835	P161_RS0100835	162	hypothetical protein			6	6	6	2	3	0	0	0	0	0	2	0	31.6	20.485	4093500	985080	2547100	0	0	0	0	0	561290	0	292390	70363	181940	0	0.00027799	0.000367016	0	2	0.000322503	0.000156313	0	0	0	0	0	0	0	0	0	0
P161_RS0100840	P161_RS0100840	163	hypothetical protein			23	23	23	16	17	22	10	11	9	10	11	11	57	44.062	805500000	83072000	219270000	196070000	81010000	73423000	87777000	38032000	16716000	10124000	36613000	3776000	9966800	8912400	0.0149182	0.0201054	0.0204065	3	0.0184767	0.00251925	3682300	3337400	3989900	0.00703568	0.00698696	0.00931339	3	0.00777867	0.00108539	1728700
P161_RS0100845	P161_RS0100845	164	glutamine synthetase			32	32	32	27	27	26	7	7	8	8	9	10	47	82.37	843200000	150880000	258410000	211810000	47401000	17111000	32687000	60746000	45089000	19065000	24091000	4311000	7383100	6051600	0.0170319	0.0148935	0.0138562	3	0.0152605	0.00132217	1354300	488890	933900	0.00258763	0.00102351	0.00217995	3	0.00193036	0.000662489	1735600
P161_RS0100850	P161_RS0100850	165	glutamine synthetase			31	31	31	25	26	27	20	19	20	17	15	14	88.9	38.342	30973000000	1770900000	4551200000	4593900000	2203700000	4687900000	3007500000	3691000000	4650400000	1816200000	2212300000	126490000	325080000	328130000	0.499736	0.655763	0.751313	3	0.635604	0.10369	157400000	334850000	214820000	0.30074	0.70102	0.501441	3	0.501067	0.163414	263640000
P161_RS0100855	P161_RS0100855	166	HAMP domain-containing protein	HK|Classic		12	12	12	6	9	9	1	1	1	1	1	1	20.6	63.08	32956000	4126000	8729400	16512000	2083100	393510	0	388100	468820	254880	1029900	128940	272790	516000	0.000509415	0.000550282	0.00118148	3	0.000747057	0.000307632	65098	12297	0	0.000124381	2.57442e-05	0	2	7.50627e-05	5.36063e-05	12128
P161_RS0100860	P161_RS0100860	167	response regulator transcription factor	RR|NarL		5	5	5	1	4	1	0	1	0	0	0	0	20.7	23.394	6209300	93849	5999700	0	0	115760	0	0	0	0	477640	7219.2	461510	0	2.85216e-05	0.000930975	0	2	0.000479748	0.0004323	0	8904.4	0	0	1.86417e-05	0	1	0	0	0
P161_RS0100865	P161_RS0100865	168	hypothetical protein			2	2	2	2	2	2	2	1	0	2	0	2	24.2	10.996	15224000	3073300	6036200	3662000	270490	383030	0	356000	0	1442500	5074500	1024400	2012100	1220700	0.00404719	0.00405888	0.00279501	3	0.0036337	0.000593057	90164	127680	0	0.000172274	0.000267302	0	2	0.000219788	0.000110634	118670
P161_RS0100875	P161_RS0100875	169	DUF4136 domain-containing protein			15	15	15	7	9	9	7	8	8	7	1	12	49.7	21.13	6884000000	332740000	354610000	920020000	1024500000	782340000	752540000	1043900000	56186	1673200000	983420000	47535000	50659000	131430000	0.187801	0.102191	0.300933	3	0.196975	0.0813948	146360000	111760000	107510000	0.279646	0.233973	0.250954	3	0.254858	0.0188492	149130000
P161_RS0100885	P161_RS0100885	170	D-alanyl-D-alanine carboxypeptidase family protein			2	2	2	2	2	0	1	1	1	1	1	1	10.4	22.829	11914000	2481100	4855200	0	1295300	407440	0	692610	1757400	425330	992860	206760	404600	0	0.000816866	0.000816174	0	2	0.00081652	0.000384911	107940	33954	0	0.000206238	7.10838e-05	0	2	0.000138661	8.554e-05	57717
P161_RS0100890	P161_RS0100890	171	methylmalonyl-CoA mutase family protein			68	68	68	46	58	57	26	33	26	38	28	24	58.6	131.92	4177200000	176580000	579840000	650440000	185840000	702990000	200980000	581670000	680850000	418030000	69620000	2942900	9664100	10841000	0.0116268	0.0194948	0.0248224	3	0.018648	0.00542027	3097400	11717000	3349600	0.00591813	0.0245299	0.00781877	3	0.0127556	0.00836178	9694500
P161_RS0100900	P161_RS0100900	172	carboxypeptidase-like regulatory domain-containing protein			5	5	5	3	1	1	1	0	1	0	1	0	13.1	65.148	29189000	19303000	1932600	2459000	2470300	0	2334400	0	689850	0	1042500	689400	69022	87822	0.00272368	0.000139234	0.000201084	3	0.00102133	0.001204	88227	0	83371	0.000168573	0	0.000194608	2	0.000181591	8.62599e-05	0
P161_RS0100920	P161_RS0100920	175	transcriptional regulator	TR|TrmB		5	5	5	3	3	0	1	2	1	2	0	2	30.5	19.366	7381200	2332500	3657400	0	397800	534300	0	127260	0	332040	492080	155500	243820	0	0.000614348	0.000491843	0	2	0.000553095	0.000265485	26520	35620	0	5.06711e-05	7.45717e-05	0	2	6.26214e-05	3.10908e-05	8484
P161_RS0100925	P161_RS0100925	176	peptidylprolyl isomerase			5	5	5	5	5	4	3	3	3	3	0	4	63.3	15.789	4197500000	380940000	528020000	352090000	539620000	429500000	430630000	581680000	0	955040000	839500000	76188000	105600000	70417000	0.301003	0.21302	0.161232	3	0.225085	0.0576953	107920000	85900000	86127000	0.2062	0.179835	0.201041	3	0.195692	0.011409	116340000
P161_RS0100930	P161_RS0100930	177	sigma-70 family RNA polymerase sigma factor	SF|Ecf		4	4	4	2	3	1	0	0	0	0	0	0	25.1	20.677	3306400	723020	1971300	612100	0	0	0	0	0	0	413300	90378	246410	76513	0.000357065	0.000497067	0.00017519	3	0.000343107	0.000131776	0	0	0	0	0	0	0	0	0	0
P161_RS0100940	P161_RS0100940	179	dienelactone hydrolase family protein			2	2	2	2	2	0	1	1	0	1	1	0	7.8	33.138	4519100	1551100	1265700	0	525250	378540	0	526900	271600	0	301270	103410	84381	0	0.000408551	0.000170216	0	2	0.000289384	0.000167561	35017	25236	0	6.69061e-05	5.28324e-05	0	2	5.98693e-05	2.88015e-05	35127
P161_RS0100945	P161_RS0100945	180	zinc carboxypeptidase			33	33	33	26	25	29	17	14	12	22	21	21	41.8	95.79	1008700000	63853000	104920000	119560000	84919000	128740000	28140000	120010000	243060000	115460000	21014000	1330300	2185800	2490800	0.00525574	0.00440928	0.00570314	3	0.00512272	0.000536526	1769100	2682000	586260	0.00338018	0.00561486	0.00136847	3	0.0034545	0.00173438	2500300
P161_RS0100950	P161_RS0100950	181	class I SAM-dependent methyltransferase			8	8	8	6	4	0	3	2	1	2	1	1	29.3	31.166	14570000	5213600	6604600	0	1274300	345140	0	526730	358390	247080	857050	306680	388510	0	0.00121163	0.000783717	0	2	0.000997673	0.000501704	74961	20302	0	0.000143226	4.25029e-05	0	2	9.28645e-05	6.00605e-05	30984
P161_RS0100955	P161_RS0100955	182	hypothetical protein			18	18	18	10	17	0	2	2	2	3	3	4	66.3	28.904	134740000	21582000	78881000	0	1114500	1954400	1722900	17881000	5754500	5847400	8982500	1438800	5258700	0	0.0056844	0.010608	0	2	0.00814622	0.00433443	74297	130290	114860	0.000141957	0.000272766	0.000268111	3	0.000227612	6.05964e-05	1192100
P161_RS0100960	P161_RS0100960	183	hypothetical protein			14	14	14	11	14	3	6	4	3	2	3	4	42.8	35.034	166140000	19858000	91816000	407130	23345000	26600000	1324800	886840	1099500	804950	9773100	1168100	5400900	23949	0.00461492	0.0108949	5.48356e-05	3	0.00518822	0.00444396	1373300	1564700	77928	0.00262393	0.00327575	0.000181903	3	0.00202719	0.00133168	52167
P161_RS0100965	P161_RS0100965	184	citrate synthase			43	43	43	29	36	23	24	21	26	28	30	31	82.7	47.813	24249000000	1633700000	3619400000	2912100000	1875000000	1056400000	1902600000	4212200000	3790600000	3246500000	1347100000	90763000	201080000	161790000	0.358586	0.405626	0.370447	3	0.37822	0.019975	104170000	58686000	105700000	0.199035	0.122861	0.246729	3	0.189542	0.0510125	234010000
P161_RS0100970	P161_RS0100970	185	phosphopyruvate hydratase			44	44	44	34	35	29	24	23	24	26	32	28	97.7	46.138	53748000000	3833900000	7636100000	10002000000	4184600000	2984700000	5479500000	5862000000	8770600000	4993700000	2828800000	201790000	401900000	526440000	0.79723	0.810727	1.20538	3	0.937779	0.189302	220240000	157090000	288400000	0.420807	0.328873	0.673195	3	0.474292	0.145567	308530000
P161_RS0100975	P161_RS0100975	186	glutamine-hydrolyzing carbamoyl-phosphate synthase small subunit			14	14	14	12	13	12	11	11	10	9	10	8	43.3	41.182	1824500000	131390000	224850000	342950000	246560000	303080000	113960000	204450000	223970000	33333000	121640000	8759500	14990000	22863000	0.034607	0.0302384	0.052349	3	0.0390648	0.00956116	16437000	20205000	7597100	0.0314058	0.0422998	0.0177335	3	0.0304797	0.0100505	13630000
P161_RS0100980	P161_RS0100980	187	50S ribosomal protein L17			12	12	12	8	11	10	9	10	9	7	9	8	63.8	18.156	9886600000	576020000	1543200000	693830000	1276200000	1143100000	896280000	918250000	1328800000	1510900000	1235800000	72003000	192890000	86729000	0.284469	0.389105	0.198582	3	0.290718	0.0779061	159530000	142890000	112040000	0.30481	0.299145	0.261528	3	0.288494	0.0192077	114780000
P161_RS0100985	P161_RS0100985	188	DNA-directed RNA polymerase subunit alpha			42	42	42	30	34	29	26	23	25	26	27	26	91.8	37.21	58654000000	3696800000	7216500000	10265000000	6527400000	3718500000	6743300000	7114800000	8145700000	5226600000	2932700000	184840000	360820000	513230000	0.730265	0.727859	1.17513	3	0.877752	0.210282	326370000	185920000	337160000	0.623587	0.38923	0.787012	3	0.599943	0.163252	355740000
P161_RS0100990	P161_RS0100990	189	30S ribosomal protein S4			27	27	27	21	27	21	23	21	20	18	22	21	86.6	22.742	32298000000	2366800000	3914500000	3751500000	2502400000	5946800000	2439200000	3114100000	3202700000	5059900000	2484500000	182060000	301110000	288580000	0.719281	0.60741	0.660756	3	0.662482	0.0456876	192500000	457450000	187630000	0.367805	0.957687	0.437974	3	0.587822	0.263098	239540000
P161_RS0100995	P161_RS0100995	190	30S ribosomal protein S11			7	7	7	5	6	4	5	5	5	4	2	6	48.8	13.62	968460000	110200000	149950000	122710000	188690000	98876000	99779000	46930000	1132600	150190000	242110000	27550000	37488000	30678000	0.108844	0.0756222	0.0702428	3	0.0849031	0.0170709	47172000	24719000	24945000	0.0901304	0.05175	0.0582276	3	0.0667027	0.0167756	11732000
P161_RS0101000	P161_RS0101000	191	30S ribosomal protein S13			15	15	15	10	14	10	6	5	5	6	3	10	60.3	13.696	940010000	187250000	191550000	141880000	69405000	36931000	48165000	126860000	2303500	135660000	134290000	26750000	27364000	20269000	0.105684	0.0551997	0.0464095	3	0.0690976	0.026118	9915000	5275900	6880600	0.0189443	0.0110453	0.016061	3	0.0153502	0.00326371	18123000
P161_RS0101010	P161_RS0101010	193	translation initiation factor IF-1			4	4	4	3	3	3	1	1	1	1	0	2	53.5	8.0974	118270000	35849000	33768000	27457000	6380700	4277700	2746900	3937500	0	3849600	39422000	11950000	11256000	9152500	0.047212	0.022706	0.0209563	3	0.0302914	0.0119859	2126900	1425900	915630	0.00406382	0.00298517	0.0021373	3	0.00306209	0.000788375	1312500
P161_RS0101015	P161_RS0101015	194	preprotein translocase subunit SecY			12	12	12	10	12	10	6	6	6	7	7	5	23	47.432	3563100000	266700000	1026000000	756340000	349600000	320510000	300930000	278250000	221100000	43656000	274080000	20515000	78924000	58180000	0.0810505	0.159208	0.133214	3	0.124491	0.0324985	26893000	24654000	23148000	0.0513838	0.051614	0.054033	3	0.0523436	0.00119828	21404000
P161_RS0101020	P161_RS0101020	195	50S ribosomal protein L15			13	13	13	10	11	10	11	10	8	9	1	11	73.2	15.79	5101500000	236120000	394740000	337490000	641880000	249570000	576800000	1039700000	380590	1624800000	637690000	29515000	49342000	42186000	0.116608	0.0995345	0.0965925	3	0.104245	0.00882393	80235000	31197000	72101000	0.153303	0.065312	0.168301	3	0.128972	0.045429	129960000
P161_RS0101025	P161_RS0101025	196	50S ribosomal protein L30			5	5	5	3	5	4	3	3	3	3	0	2	66.7	6.812	1651700000	38525000	147150000	211450000	238230000	307100000	274300000	235310000	0	199580000	550550000	12842000	49049000	70485000	0.0507361	0.0989434	0.161388	3	0.103689	0.045298	79411000	102370000	91434000	0.151729	0.214315	0.213429	3	0.193158	0.0292969	78438000
P161_RS0101030	P161_RS0101030	197	30S ribosomal protein S5			18	18	18	11	15	13	13	13	11	10	4	17	74.1	18.025	15971000000	235840000	427440000	1982100000	3354000000	1875100000	2259700000	2553800000	21917000	3261200000	1774600000	26205000	47493000	220230000	0.103531	0.0958046	0.504256	3	0.23453	0.190751	372670000	208340000	251080000	0.712051	0.436167	0.586081	3	0.5781	0.112771	283750000
P161_RS0101035	P161_RS0101035	198	50S ribosomal protein L18			11	11	11	9	11	7	9	7	9	6	3	9	70.7	12.879	5422300000	915310000	1115000000	682380000	611690000	574170000	417730000	595720000	2173900	508210000	903720000	152550000	185830000	113730000	0.602693	0.374863	0.260405	3	0.412654	0.142271	101950000	95695000	69622000	0.194793	0.200341	0.162514	3	0.185883	0.0166784	99286000
P161_RS0101040	P161_RS0101040	199	50S ribosomal protein L6			28	28	28	18	23	18	21	18	17	18	17	17	88.4	19.532	30011000000	1702000000	1637400000	4704600000	5031500000	4337600000	3064800000	3516400000	1636400000	4380400000	2728300000	154730000	148860000	427690000	0.611306	0.300286	0.979273	3	0.630288	0.27752	457410000	394330000	278610000	0.873962	0.825543	0.650343	3	0.783283	0.0960585	319670000
P161_RS0101045	P161_RS0101045	200	30S ribosomal protein S8			16	16	16	14	15	14	13	12	10	11	5	11	84.8	14.803	23313000000	1096600000	1924500000	4679200000	3999000000	2466400000	2228800000	2780200000	65132000	4073500000	2914200000	137080000	240570000	584900000	0.541575	0.485287	1.33923	3	0.788698	0.389965	499880000	308300000	278600000	0.955108	0.645436	0.650319	3	0.750288	0.144844	347530000
P161_RS0101050	P161_RS0101050	201	30S ribosomal protein S14			8	8	8	8	8	6	5	5	5	6	1	6	38.2	10.29	1228300000	155460000	242330000	103470000	50861000	52238000	26961000	140940000	5122300	450910000	614140000	77731000	121160000	51733000	0.307099	0.244408	0.118452	3	0.22332	0.0784452	25431000	26119000	13481000	0.0485904	0.054681	0.0314679	3	0.0449131	0.00982697	70468000
P161_RS0101055	P161_RS0101055	202	50S ribosomal protein L5			32	32	32	27	30	20	23	23	21	20	25	21	95.1	20.413	55835000000	5332100000	7107200000	8940300000	8368400000	5897600000	4069800000	3962900000	6907200000	5249500000	5075900000	484730000	646110000	812760000	1.91507	1.30336	1.86096	3	1.69313	0.276494	760770000	536150000	369980000	1.45358	1.12245	0.863622	3	1.14655	0.241453	360260000
P161_RS0101060	P161_RS0101060	203	50S ribosomal protein L24			13	13	13	6	10	6	7	6	6	5	2	8	86	10.886	6796700000	397990000	395240000	631300000	717500000	442340000	374200000	1883100000	15740000	1939400000	1699200000	99497000	98811000	157830000	0.393092	0.199325	0.36138	3	0.317932	0.0848614	179380000	110580000	93550000	0.342737	0.231503	0.218368	3	0.264203	0.0557904	470770000
P161_RS0101065	P161_RS0101065	204	50S ribosomal protein L14			14	14	14	10	11	11	12	12	11	8	4	13	70.5	13.53	6214000000	242720000	379460000	431310000	932570000	579170000	988200000	894750000	40168000	1725700000	887720000	34675000	54208000	61616000	0.136994	0.10935	0.141081	3	0.129142	0.0140937	133220000	82738000	141170000	0.25454	0.173215	0.329525	3	0.252427	0.0638308	127820000
P161_RS0101070	P161_RS0101070	205	30S ribosomal protein S17			9	9	9	7	9	6	7	6	5	5	2	7	68.2	10.091	359050000	66121000	118960000	26124000	29583000	17837000	8728100	42321000	7530100	41841000	71810000	13224000	23793000	5224800	0.0522453	0.0479961	0.0119631	3	0.0374015	0.0180711	5916600	3567400	1745600	0.0113047	0.00746847	0.00407465	3	0.00761594	0.0029535	8464300
P161_RS0101080	P161_RS0101080	207	50S ribosomal protein L16			10	10	10	9	10	6	8	7	9	5	7	8	63.6	15.889	10879000000	876860000	2071500000	1210700000	1726600000	1431700000	1123100000	741230000	91508000	1606000000	1813200000	146140000	345260000	201790000	0.577369	0.696471	0.462035	3	0.578625	0.0957124	287760000	238610000	187180000	0.549816	0.499538	0.436923	3	0.495426	0.04618	123540000
P161_RS0101085	P161_RS0101085	208	30S ribosomal protein S3			25	25	25	19	24	13	16	17	19	14	19	17	67.1	26.899	15289000000	591960000	1950100000	472680000	789140000	2809500000	1711800000	1892100000	2465100000	2606400000	1176100000	45535000	150010000	36360000	0.179899	0.302606	0.0832528	3	0.188586	0.0897608	60703000	216120000	131680000	0.115984	0.452454	0.307373	3	0.291937	0.137797	145550000
P161_RS0101090	P161_RS0101090	209	50S ribosomal protein L22			16	16	16	14	16	10	11	11	10	10	4	12	77.6	14.977	5346400000	490750000	954850000	503670000	422100000	338430000	364460000	967260000	26686000	1278200000	668300000	61344000	119360000	62959000	0.242357	0.240777	0.144156	3	0.209097	0.0459247	52762000	42304000	45558000	0.100811	0.0885648	0.106343	3	0.0985731	0.00742855	120910000
P161_RS0101095	P161_RS0101095	210	30S ribosomal protein S19			7	7	7	6	6	6	6	6	6	5	2	7	62	10.227	14149000000	348380000	697150000	2143600000	2315000000	2427000000	1522400000	1522800000	2462600	3169800000	2829700000	69676000	139430000	428720000	0.275275	0.281263	0.981632	3	0.512724	0.331577	463010000	485400000	304490000	0.884662	1.0162	0.710753	3	0.870539	0.125098	304550000
P161_RS0101100	P161_RS0101100	211	50S ribosomal protein L2			17	17	17	13	15	6	14	13	16	12	12	11	51.1	29.864	15082000000	526840000	2394700000	89662000	2014300000	1614800000	3064100000	1747000000	2162300000	1468500000	1256900000	43903000	199560000	7471800	0.173452	0.40256	0.017108	3	0.197706	0.158292	167860000	134570000	255340000	0.320726	0.281727	0.596025	3	0.399493	0.139878	145580000
P161_RS0101105	P161_RS0101105	212	50S ribosomal protein L23			14	14	14	13	13	11	11	9	10	11	2	13	87.5	10.749	12361000000	919230000	1058600000	1217000000	1659200000	1242200000	1232000000	2298900000	503950	2733500000	2060200000	153200000	176440000	202840000	0.605261	0.355921	0.464439	3	0.475207	0.102077	276530000	207030000	205340000	0.528359	0.433424	0.479313	3	0.480365	0.0387641	383150000
P161_RS0101110	P161_RS0101110	213	50S ribosomal protein L4			26	26	26	18	24	11	22	22	20	21	23	22	71.3	23.191	29416000000	934300000	2572100000	433750000	5361100000	2213300000	4997000000	4402200000	4182600000	4320000000	2941600000	93430000	257210000	43375000	0.369123	0.518853	0.0993149	3	0.329097	0.173599	536110000	221330000	499700000	1.02433	0.463362	1.16642	3	0.884705	0.303529	440220000
P161_RS0101115	P161_RS0101115	214	50S ribosomal protein L3			24	24	24	15	18	11	20	19	19	15	21	19	70.2	21.98	24179000000	461380000	3296800000	518470000	1751200000	4073200000	2828700000	3544300000	4845800000	2858900000	1859900000	35491000	253600000	39882000	0.140218	0.511571	0.091317	3	0.247702	0.187649	134710000	313320000	217590000	0.257387	0.655946	0.507907	3	0.473747	0.164494	272640000
P161_RS0101120	P161_RS0101120	215	30S ribosomal protein S10			15	15	15	15	15	10	9	9	11	7	1	11	75.2	11.401	4514500000	573490000	706540000	582170000	534520000	273890000	280410000	515640000	0	1047800000	752420000	95582000	117760000	97029000	0.377625	0.23755	0.222165	3	0.279113	0.0699406	89087000	45649000	46735000	0.170216	0.0955677	0.109091	3	0.124958	0.032475	85939000
P161_RS0101125	P161_RS0101125	216	elongation factor G			69	69	69	63	60	57	60	51	54	55	50	51	89.6	78.005	113960000000	8375200000	14648000000	13602000000	17967000000	15753000000	14189000000	12260000000	8381200000	8787100000	2999000000	220400000	385480000	357950000	0.870755	0.777604	0.819591	3	0.82265	0.03809	472810000	414560000	373390000	0.903386	0.867895	0.871582	3	0.880955	0.015933	322630000
P161_RS0101130	P161_RS0101130	217	30S ribosomal protein S7			18	18	18	14	16	12	14	14	14	11	2	13	69.2	18.379	22547000000	881970000	1567400000	3456600000	3960200000	4135100000	2538500000	1760200000	1289000	4245500000	2254700000	88197000	156740000	345660000	0.348448	0.316182	0.791451	3	0.48536	0.216839	396020000	413510000	253850000	0.756666	0.865697	0.592547	3	0.738303	0.112266	176020000
P161_RS0101135	P161_RS0101135	218	30S ribosomal protein S12			6	6	6	5	5	5	5	5	5	4	3	6	52.4	13.747	4277900000	287990000	313150000	692430000	479320000	503710000	478360000	328990000	7064500	1186900000	855590000	57597000	62630000	138490000	0.227554	0.12634	0.317098	3	0.223664	0.0779253	95865000	100740000	95672000	0.183167	0.210903	0.223321	3	0.205797	0.0167858	65799000
P161_RS0101140	P161_RS0101140	219	hypothetical protein			8	8	8	2	1	0	4	3	1	0	0	1	18.5	56.695	3862100	634380	717030	0	1638600	622550	249560	0	0	0	154480	25375	28681	0	0.000100251	5.78564e-05	0	2	7.90539e-05	4.10894e-05	65542	24902	9982.2	0.000125229	5.21332e-05	2.33009e-05	3	6.68878e-05	4.29002e-05	0
P161_RS0101145	P161_RS0101145	220	SusC/RagA family TonB-linked outer membrane protein	SusC-like		71	71	71	62	65	63	60	56	55	60	64	56	78.7	110.07	293740000000	19942000000	27872000000	24401000000	34111000000	38039000000	35052000000	31441000000	49049000000	33829000000	8159300000	553940000	774220000	677810000	2.1885	1.56178	1.55197	3	1.76742	0.297778	947530000	1056600000	973670000	1.81042	2.21203	2.27278	3	2.09841	0.205143	873360000
P161_RS18910	P161_RS18910	221	RagB/SusD family nutrient uptake outer membrane protein	SusD-like		52	52	52	41	47	44	48	45	43	44	47	44	90.1	55.274	332780000000	17411000000	29836000000	33800000000	46433000000	46027000000	39375000000	45374000000	49492000000	25028000000	12325000000	644860000	1105000000	1251900000	2.54771	2.22905	2.86645	3	2.54774	0.260219	1719700000	1704700000	1458300000	3.28579	3.56885	3.40402	3	3.41955	0.116078	1680500000
P161_RS0101155	P161_RS0101155	222	hypothetical protein			4	4	4	1	3	1	3	3	2	3	3	2	27.7	29.245	9770400000	152210000	1976000000	55107000	1942000000	740540000	525900000	1768200000	1726000000	884440000	4885200000	76104000	988010000	27553000	0.300671	1.99305	0.0630876	3	0.785603	0.859286	971000000	370270000	262950000	1.85527	0.775173	0.613788	3	1.08141	0.551152	884090000
P161_RS0101160	P161_RS0101160	223	23S rRNA (guanosine(2251)-2'-O)-methyltransferase RlmB			19	19	19	13	17	1	8	8	8	11	10	9	65.7	27.031	1348200000	104600000	412760000	576200	245100000	18684000	67204000	235710000	167980000	95629000	89883000	6973200	27517000	38413	0.0275497	0.0555083	8.79535e-05	3	0.0277153	0.0226256	16340000	1245600	4480300	0.0312204	0.00260771	0.0104581	3	0.0147621	0.012071	15714000
P161_RS0101170	P161_RS0101170	225	replication-associated recombination protein A			9	9	9	9	9	3	3	3	2	2	3	2	31.4	47.199	77004000	14660000	31123000	8847900	3068800	1860400	1298600	14046000	966280	1133600	3500200	666350	1414700	402180	0.00263261	0.00285378	0.000920864	3	0.00213575	0.000863789	139490	84563	59025	0.00026652	0.000177035	0.000137779	3	0.000193778	5.38754e-05	638460
P161_RS0101175	P161_RS0101175	226	hypothetical protein			13	13	13	11	11	2	3	2	2	2	2	1	44.2	30.666	53567000	19240000	29246000	859370	2321800	488930	82421	491620	664690	172900	4869800	1749100	2658700	78125	0.00691033	0.00536323	0.000178881	3	0.00415081	0.00287872	211070	44448	7492.8	0.000403286	9.30534e-05	1.749e-05	3	0.000171277	0.000166931	44693
P161_RS0101180	P161_RS0101180	227	hypothetical protein			5	5	5	3	2	2	1	0	1	0	1	1	15.7	51.802	22377000	3387800	3682300	863050	2715700	0	11379000	0	0	349760	1177800	178310	193810	45424	0.000704466	0.000390961	0.000104006	3	0.000399811	0.000245216	142930	0	598890	0.000273093	0	0.00139795	2	0.000835523	0.000604994	0
P161_RS0101185	P161_RS0101185	228	hypothetical protein			2	2	2	1	0	0	0	2	1	1	1	1	17.9	19.401	8424400	584100	0	0	0	3680500	857890	1918300	1078200	305520	1404100	97349	0	0	0.000384606	0	0	1	0	0	0	613410	142980	0	0.00128419	0.00033375	2	0.000808972	0.000544047	319710
P161_RS0101190	P161_RS0101190	229	noncanonical pyrimidine nucleotidase, YjjG family			4	4	4	3	2	0	0	0	0	0	0	0	16.2	26.802	47996000	7794200	40202000	0	0	0	0	0	0	0	6856600	1113500	5743200	0	0.00439921	0.0115854	0	2	0.0079923	0.00477512	0	0	0	0	0	0	0	0	0	0
P161_RS0101205	P161_RS0101205	232	hypothetical protein			5	5	5	2	3	0	1	2	0	2	1	2	17.9	35.626	11282000	1960500	7149600	0	513870	295540	0	686670	288880	386890	705120	122530	446850	0	0.000484091	0.000901402	0	2	0.000692746	0.000368332	32117	18471	0	6.13652e-05	3.86697e-05	0	2	5.00174e-05	2.53336e-05	42917
P161_RS0101210	P161_RS0101210	233	hypothetical protein			4	4	4	3	3	0	0	1	0	0	0	0	9	51.193	26028000	5287900	20572000	0	0	167470	0	0	0	0	1041100	211520	822900	0	0.000835672	0.00165998	0	2	0.00124783	0.000677691	0	6698.7	0	0	1.4024e-05	0	1	0	0	0
P161_RS0101215	P161_RS0101215	234	JAB domain-containing protein			2	2	2	1	2	0	0	1	0	1	1	0	11	25.08	3725600	335050	1863600	0	0	685640	0	400470	440890	0	286590	25773	143350	0	0.000101824	0.000289171	0	2	0.000195497	0.000119762	0	52742	0	0	0.000110417	0	1	0	0	30805
P161_RS0101220	P161_RS0101220	235	Trk system potassium transporter TrkA			12	12	12	10	12	9	5	3	8	4	4	4	28.6	49.831	201650000	18356000	52581000	29906000	56951000	2932600	24735000	5172100	6888200	4132800	8402300	764840	2190900	1246100	0.00302172	0.00441956	0.00285317	3	0.00343149	0.000702056	2373000	122190	1030600	0.00453403	0.000255809	0.00240567	3	0.0023985	0.00174658	215500
P161_RS0101230	P161_RS0101230	237	T9SS type A sorting domain-containing protein			17	17	17	16	15	17	7	5	4	6	6	3	29.5	108.23	2382600000	147270000	230110000	274080000	280310000	232290000	210640000	313820000	410570000	283490000	125400000	7751100	12111000	14425000	0.030623	0.0244307	0.0330286	3	0.0293608	0.00362177	14753000	12226000	11086000	0.0281882	0.0255955	0.0258774	3	0.0265537	0.00116147	16517000
P161_RS0101240	P161_RS0101240	239	hypothetical protein			10	10	10	7	6	2	1	4	3	3	5	3	28.8	43.853	55222000	13357000	16884000	894880	873760	1610900	2222600	1985800	15825000	1568100	2629600	636030	803990	42613	0.00251282	0.00162184	9.75702e-05	3	0.00141074	0.000997257	41608	76711	105840	7.94994e-05	0.000160597	0.000247056	3	0.000162384	6.84164e-05	94560
P161_RS0101245	P161_RS0101245	240	nucleotidyltransferase family protein			8	8	8	7	6	6	1	2	1	1	1	1	22.4	43.535	22785000	7569600	8116700	4702100	859500	261020	158840	445930	339530	331800	1035700	344070	368940	213730	0.00135935	0.000744239	0.000489373	3	0.000864321	0.000365175	39068	11865	7220.1	7.46463e-05	2.48398e-05	1.68534e-05	3	3.87798e-05	2.55701e-05	20270
P161_RS0101250	P161_RS0101250	241	peptidoglycan synthetase			21	21	21	15	19	17	9	6	8	12	7	7	51.8	51.138	752960000	32695000	103840000	121020000	96927000	93497000	52191000	129090000	77912000	45784000	30118000	1307800	4153600	4840900	0.00516685	0.00837879	0.0110841	3	0.00820992	0.00241866	3877100	3739900	2087700	0.00740788	0.0078296	0.00487319	3	0.00670356	0.00130567	5163700
P161_RS0101255	P161_RS0101255	242	TonB-dependent receptor plug domain-containing protein	putative SusC-like		86	86	86	51	67	65	28	33	27	49	39	36	44	250.71	2915600000	210790000	246220000	344440000	129610000	333010000	147510000	440440000	777320000	286240000	23704000	1713700	2001800	2800300	0.00677047	0.0040381	0.00641179	3	0.00574012	0.00121238	1053800	2707400	1199300	0.00201347	0.00566803	0.00279945	3	0.00349365	0.00157065	3580800
P161_RS0101265	P161_RS0101265	245	hypothetical protein			6	6	6	5	5	5	5	6	5	5	0	5	37.7	17.463	4360600000	97368000	101700000	387090000	623550000	344200000	467040000	890560000	0	1449100000	622940000	13910000	14529000	55298000	0.0549555	0.0293084	0.126615	3	0.0702929	0.0411789	89079000	49172000	66720000	0.170201	0.102943	0.155741	3	0.142962	0.0289065	127220000
P161_RS0101270	P161_RS0101270	246	DUF4136 domain-containing protein			4	4	4	3	3	2	1	2	3	2	0	3	34.7	19.46	50035000	3768900	3258200	884450	8727000	3767700	11479000	592260	0	17558000	5559500	418770	362020	98272	0.00165447	0.00073028	0.000225011	3	0.000869922	0.00059187	969670	418630	1275400	0.00185272	0.000876416	0.00297709	3	0.00190208	0.000858306	65807
P161_RS0101275	P161_RS0101275	247	M20/M25/M40 family metallo-hydrolase			22	22	22	15	16	15	12	15	13	10	12	10	69.3	36.6	2771400000	94180000	236800000	216010000	418590000	507460000	330720000	374370000	417180000	176040000	145860000	4956800	12463000	11369000	0.0195833	0.0251408	0.0260314	3	0.0235852	0.00285301	22031000	26708000	17406000	0.0420941	0.0559141	0.0406298	3	0.0462127	0.00688595	19704000
P161_RS0101280	P161_RS0101280	248	3-deoxy-8-phosphooctulonate synthase			15	15	15	13	15	1	10	10	12	10	8	11	71.4	29.951	4597100000	301960000	801230000	0	745260000	509580000	510690000	747050000	468810000	512540000	306470000	20131000	53416000	0	0.0795334	0.107753	0	2	0.0936431	0.0456223	49684000	33972000	34046000	0.09493	0.0711215	0.0794715	3	0.081841	0.00986312	49804000
P161_RS0101285	P161_RS0101285	249	transglutaminase			8	8	8	7	7	0	3	1	1	2	2	1	28.8	37.198	58494000	8932000	19861000	0	14379000	1751500	0	709660	12506000	354160	3440800	525410	1168300	0	0.00207579	0.00235674	0	2	0.00221626	0.00105103	845820	103030	0	0.00161609	0.000215697	0	2	0.000915892	0.000716423	41745
P161_RS0101300	P161_RS0101300	252	universal stress protein			5	5	5	4	3	2	2	2	2	3	0	2	36.4	16.808	80959000	2160300	2069900	1210600	14277000	11430000	14553000	19061000	0	16196000	8995500	240030	229990	134510	0.000948309	0.000463944	0.000307985	3	0.000573413	0.000272631	1586400	1270000	1617100	0.0030311	0.00265879	0.0037747	3	0.00315486	0.000463899	2117900
P161_RS0101340	P161_RS0101340	260	mechanosensitive ion channel			4	4	4	1	3	0	0	0	0	0	0	1	15.8	32.712	10330000	1046200	9163000	0	0	0	0	0	0	121140	939120	95111	833000	0	0.000375764	0.00168036	0	2	0.00102806	0.00072009	0	0	0	0	0	0	0	0	0	0
P161_RS0101350	P161_RS0101350	262	alanine dehydrogenase			14	14	14	12	13	12	10	6	8	6	8	10	36.7	45.787	270420000	24560000	60188000	56743000	30856000	12591000	15743000	26975000	29797000	12962000	10401000	944630	2314900	2182400	0.00373204	0.0046697	0.004997	3	0.00446625	0.000536083	1186800	484280	605500	0.00226759	0.00101386	0.00141338	3	0.00156494	0.000522934	1037500
P161_RS0101360	P161_RS0101360	265	TolC family protein			5	5	5	2	3	4	2	2	1	2	2	2	11.2	53.307	12653000	550460	2151000	3825000	1785200	572970	276280	1657700	1385300	449480	550150	23933	93521	166300	9.45543e-05	0.000188654	0.000380774	3	0.000221327	0.000119111	77619	24912	12012	0.000148305	5.21541e-05	2.80389e-05	3	7.61659e-05	5.19512e-05	72075
P161_RS0101365	P161_RS0101365	266	ABC transporter ATP-binding protein			7	7	7	5	7	2	4	2	3	3	3	2	36.8	25.297	155660000	5311500	14655000	2175800	30407000	44965000	17669000	25464000	14573000	441770	12972000	442620	1221200	181320	0.0017487	0.00246345	0.000415165	3	0.00154244	0.000848833	2533900	3747100	1472400	0.00484146	0.00784468	0.00343694	3	0.00537436	0.00183848	2122000
P161_RS0101385	P161_RS0101385	270	ABC transporter ATP-binding protein			3	3	3	3	2	0	0	0	0	0	0	0	16	25.371	5387200	1310700	4076400	0	0	0	0	0	0	0	673390	163840	509550	0	0.000647298	0.00102788	0	2	0.00083759	0.000424314	0	0	0	0	0	0	0	0	0	0
P161_RS0101395	P161_RS0101395	272	sigma-54-dependent Fis family transcriptional regulator	RR|NtrC		15	15	15	13	10	6	7	2	8	4	4	4	42	50.134	156080000	17407000	42800000	23943000	33669000	7207300	18911000	2226400	7392900	2522500	5780700	644690	1585200	886770	0.00254704	0.00319772	0.00203042	3	0.00259173	0.000477596	1247000	266940	700400	0.00238261	0.000558848	0.0016349	3	0.00152545	0.00074856	82461
P161_RS0101400	P161_RS0101400	273	HAMP domain-containing histidine kinase	HK|Classic		11	11	11	8	8	2	4	2	5	1	2	1	29	51.708	27290000	9932000	11312000	1295400	2022000	85247	2112800	124430	315560	90704	1091600	397280	452480	51817	0.00156957	0.000912759	0.000118644	3	0.000866991	0.000593222	80881	3409.9	84514	0.000154537	7.13874e-06	0.000197276	3	0.000119651	8.14488e-05	4977.2
P161_RS0101405	P161_RS0101405	274	hypothetical protein			4	4	4	3	3	2	1	0	0	1	1	0	15.9	31.809	72644000	8505000	17712000	18248000	324180	0	0	8707300	19147000	0	5588000	654230	1362500	1403700	0.00258473	0.00274848	0.00321402	3	0.00284908	0.000266575	24937	0	0	4.76465e-05	0	0	1	0	0	669790
P161_RS0101410	P161_RS0101410	275	glycosyltransferase	CAZyme, single-domain, contains GT2 domain		2	2	2	1	2	0	1	0	0	1	0	0	10.4	27.969	1959700	471950	1487800	0	0	0	0	0	0	0	178160	42905	135250	0	0.000169509	0.000272831	0	2	0.00022117	0.00011247	0	0	0	0	0	0	0	0	0	0
P161_RS0101415	P161_RS0101415	276	glycosyltransferase	CAZyme, single-domain, contains GT4 domain		11	11	11	8	9	7	4	3	3	0	4	0	28.2	42.814	88562000	19953000	55169000	8060600	1681200	419020	1754700	0	1524900	0	3850500	867530	2398600	350460	0.00342743	0.00483854	0.000802441	3	0.00302281	0.00167239	73095	18218	76291	0.000139661	3.814e-05	0.000178082	3	0.000118627	5.90351e-05	0
P161_RS0101420	P161_RS0101420	277	ATP-binding cassette domain-containing protein			12	12	12	9	11	1	2	1	3	4	5	2	57.5	25.781	569250000	166060000	254910000	381950	1471800	428940	61428000	42717000	36697000	5147400	37950000	11071000	16994000	25464	0.0437392	0.0342809	5.83044e-05	3	0.0260261	0.0187636	98122	28596	4095200	0.000187479	5.98667e-05	0.00955918	3	0.00326884	0.00444825	2847800
P161_RS0101425	P161_RS0101425	278	tetratricopeptide repeat protein			59	59	59	44	46	33	14	18	17	23	24	22	58.9	114.2	786470000	166230000	283420000	129390000	13558000	19677000	7989000	52223000	70829000	43148000	12893000	2725100	4646300	2121200	0.0107663	0.00937269	0.00485687	3	0.00833195	0.00252226	222250	322580	130970	0.000424648	0.000675332	0.000305715	3	0.000468565	0.000154058	856120
P161_RS0101430	P161_RS0101430	279	hypothetical protein			11	11	11	9	9	9	5	6	6	6	6	6	24.6	67.011	445420000	60486000	89244000	135200000	23834000	58684000	43784000	16186000	11174000	6826500	20246000	2749400	4056600	6145500	0.0108623	0.00818312	0.0140712	3	0.0110389	0.00240705	1083400	2667400	1990200	0.00207003	0.00558429	0.0046456	3	0.00409997	0.00148566	735740
P161_RS0101435	P161_RS0101435	280	hypothetical protein			9	9	9	6	6	1	3	1	1	4	6	2	36.6	28.342	88449000	9914200	21421000	816970	2088300	251790	506840	22754000	19475000	11221000	6317800	708160	1530100	58355	0.00279779	0.00308657	0.000133614	3	0.00200599	0.00132921	149160	17985	36203	0.000284996	3.76522e-05	8.45065e-05	3	0.000135718	0.000107275	1625300
P161_RS0101440	P161_RS0101440	281	GTPase ObgE			16	16	16	9	13	10	10	4	9	6	6	5	67.2	35.878	1206500000	47434000	161450000	159790000	222800000	109350000	216450000	113970000	131240000	44018000	54841000	2156100	7338600	7263100	0.0085183	0.0148037	0.0166302	3	0.0133174	0.00347442	10127000	4970500	9838700	0.0193494	0.0104059	0.0229659	3	0.0175737	0.00527908	5180600
P161_RS19275	P161_RS19275	282	adenylate kinase			25	25	25	19	23	10	6	5	5	9	9	9	68	41.999	541490000	83431000	211440000	31023000	24638000	44160000	14402000	91680000	32025000	8696400	22562000	3476300	8809900	1292600	0.0137341	0.0177717	0.00295964	3	0.0114885	0.00625199	1026600	1840000	600100	0.0019615	0.0038521	0.00140078	3	0.00240479	0.00104869	3820000
P161_RS0101455	P161_RS0101455	283	protein translocase subunit SecDF			52	52	52	45	49	47	35	34	35	36	38	36	50	108.65	23870000000	2791700000	4363200000	3642100000	2214700000	1919900000	2329300000	1722000000	2827600000	2059500000	568330000	66469000	103890000	86716000	0.262605	0.209571	0.198552	3	0.223576	0.0279621	52731000	45712000	55460000	0.100752	0.0956996	0.129457	3	0.108636	0.0148663	40999000
P161_RS0101465	P161_RS0101465	285	formate--tetrahydrofolate ligase			19	19	19	10	12	14	8	4	6	6	5	7	39.8	60.488	237700000	7419200	27498000	35316000	52315000	48282000	25131000	23588000	4080400	14066000	8489100	264970	982050	1261300	0.00104684	0.00198103	0.00288797	3	0.00197195	0.000751667	1868400	1724400	897520	0.00356991	0.00361009	0.00209503	3	0.00309167	0.000704926	842440
P161_RS0101470	P161_RS0101470	286	DNA helicase RecQ			11	11	11	6	7	7	1	1	0	1	2	2	18.5	79.905	28637000	5372400	12089000	8517400	0	690420	0	510340	962480	495310	665980	124940	281130	198080	0.000493612	0.000567106	0.00045354	3	0.000504753	4.70275e-05	0	16056	0	0	3.36138e-05	0	1	0	0	11868
P161_RS0101475	P161_RS0101475	287	malate dehydrogenase			22	22	22	17	20	9	18	17	15	15	16	11	92.9	32.113	16881000000	672450000	2099200000	528830000	1989700000	1432900000	3108200000	2687600000	2884900000	1476600000	1125400000	44830000	139950000	35255000	0.177114	0.282312	0.0807227	3	0.18005	0.0823248	132650000	95529000	207210000	0.253451	0.199993	0.483678	3	0.312374	0.12308	179170000
P161_RS0101480	P161_RS0101480	288	hypothetical protein			14	14	14	10	11	9	10	10	11	11	12	11	36.1	35.459	8207400000	141890000	341660000	147750000	864520000	1022500000	1304900000	1401200000	2083300000	899700000	586250000	10135000	24404000	10554000	0.0400413	0.0492286	0.0241653	3	0.0378117	0.0103528	61752000	73038000	93208000	0.117988	0.152907	0.21757	3	0.162822	0.0412541	100090000
P161_RS0101485	P161_RS0101485	289	DNA topoisomerase (ATP-hydrolyzing) subunit B			42	42	42	35	32	34	21	22	20	21	16	20	62.6	71.726	7388000000	693930000	1148300000	1014500000	886930000	1153400000	608260000	859940000	450930000	571890000	238320000	22385000	37042000	32725000	0.0884385	0.0747225	0.0749298	3	0.0793636	0.00641749	28611000	37206000	19621000	0.0546663	0.077892	0.0458001	3	0.0594528	0.0135316	27740000
P161_RS0101510	P161_RS0101510	294	bifunctional amidotransferase subunit GatB/aspartate--tRNA ligase AspS			77	77	77	63	67	58	28	38	30	26	29	25	72.1	126.47	8605700000	613220000	1558000000	1222400000	548300000	1800500000	775680000	552090000	921010000	614470000	143430000	10220000	25967000	20374000	0.0403771	0.0523816	0.04665	3	0.0464695	0.00490247	9138400	30008000	12928000	0.0174605	0.0628227	0.0301771	3	0.0368201	0.0191055	9201400
P161_RS0101515	P161_RS0101515	295	Asp-tRNA(Asn)/Glu-tRNA(Gln) amidotransferase subunit GatA			30	30	30	26	28	19	19	18	19	17	17	18	73.4	50.776	2458600000	125470000	495670000	483200000	279960000	141490000	159540000	509050000	207500000	56678000	84778000	4326600	17092000	16662000	0.0170935	0.0344786	0.0381507	3	0.0299076	0.0091841	9653800	4878800	5501500	0.0184453	0.0102139	0.0128418	3	0.0138337	0.00343284	17554000
P161_RS0101520	P161_RS0101520	296	hypothetical protein			3	3	3	1	1	1	1	2	2	2	0	1	38.6	9.2504	5904500	1457800	1238700	1709000	676660	90551	0	518000	0	213760	843500	208260	176950	244150	0.000822792	0.00035695	0.000559026	3	0.000579589	0.000190734	96666	12936	0	0.000184697	2.70819e-05	0	2	0.00010589	8.14379e-05	73999
P161_RS0101525	P161_RS0101525	297	anthranilate synthase component I family protein			20	20	20	13	17	17	12	7	8	8	8	9	46.4	52.364	837700000	38279000	196250000	118140000	100390000	44795000	34568000	130330000	120280000	54669000	31026000	1417700	7268700	4375500	0.00560104	0.0146627	0.0100185	3	0.0100941	0.00369979	3718000	1659100	1280300	0.00710389	0.00347338	0.00298853	3	0.00452193	0.00183642	4826900
P161_RS0101530	P161_RS0101530	298	aminodeoxychorismate/anthranilate synthase component II			9	9	9	5	8	0	2	4	2	0	1	0	68.6	21.754	553520000	19708000	325040000	0	30052000	114250000	61742000	0	2731800	0	61502000	2189800	36116000	0	0.00865145	0.0728545	0	2	0.040753	0.0324973	3339100	12694000	6860300	0.00637994	0.0265753	0.0160136	3	0.0163229	0.00824763	0
P161_RS0101535	P161_RS0101535	299	anthranilate phosphoribosyltransferase			11	11	11	8	10	10	3	3	4	4	4	4	35	36.166	159150000	7955900	62111000	70835000	4817700	3847700	3238800	1845800	3226300	1275600	11368000	568280	4436500	5059700	0.00224516	0.00894947	0.0115851	3	0.00759324	0.00393176	344120	274830	231340	0.000657502	0.000575366	0.000540003	3	0.000590957	4.92191e-05	131840
P161_RS0101545	P161_RS0101545	300	indole-3-glycerol phosphate synthase TrpC			11	11	11	9	10	1	5	5	3	6	6	4	42.4	28.828	404310000	62537000	101260000	67970	60811000	42890000	21106000	51828000	62334000	1479800	33693000	5211400	8438200	5664.2	0.0205892	0.0170218	1.29692e-05	3	0.0125413	0.0089778	5067500	3574200	1758900	0.00968235	0.00748271	0.0041057	3	0.00709025	0.00229351	4319000
P161_RS0101550	P161_RS0101550	301	DNA-deoxyinosine glycosylase			4	4	4	4	3	1	0	0	0	0	0	0	30.1	21.261	22824000	17700000	4709800	414700	0	0	0	0	0	0	2536000	1966600	523310	46078	0.00776963	0.00105564	0.000105504	3	0.00297692	0.00341108	0	0	0	0	0	0	0	0	0	0
P161_RS0101555	P161_RS0101555	302	phosphoribosylanthranilate isomerase			4	4	4	3	4	0	0	0	0	1	1	0	19.2	26.161	12819000	3337500	7691700	0	0	0	0	1002800	786960	0	986080	256730	591670	0	0.00101429	0.00119354	0	2	0.00110391	0.00052551	0	0	0	0	0	0	0	0	0	77141
P161_RS0101560	P161_RS0101560	303	tryptophan synthase subunit beta			10	10	10	8	9	6	5	4	7	3	5	4	30.5	42.971	185640000	14880000	89823000	52748000	10557000	2209500	5759100	2393800	4553500	2719900	12376000	992030	5988200	3516600	0.0039193	0.0120796	0.00805189	3	0.00801694	0.00333152	703770	147300	383940	0.00134468	0.000308377	0.000896208	3	0.000849754	0.00042434	159590
P161_RS0101565	P161_RS0101565	304	tryptophan synthase subunit alpha			12	12	12	7	10	0	3	4	3	4	3	3	52.5	28.497	255150000	12314000	168710000	0	1961000	12129000	31698000	8003900	809680	19532000	21263000	1026100	14059000	0	0.00405391	0.0283603	0	2	0.0162071	0.0125235	163410	1010700	2641500	0.000312223	0.00211593	0.0061659	3	0.00286468	0.0024477	666990
P161_RS17880	P161_RS17880	305	peptidylprolyl isomerase			6	6	6	3	5	0	1	1	2	1	1	1	37	16.048	26285000	4902700	16942000	0	1020500	394210	902150	612490	735610	775770	3755000	700380	2420300	0	0.00276706	0.00488232	0	2	0.00382469	0.00199911	145780	56316	128880	0.000278538	0.000117899	0.000300837	3	0.000232425	8.14918e-05	87499
P161_RS0101575	P161_RS0101575	306	amidohydrolase			29	29	29	24	23	24	18	13	11	12	10	10	53.4	61.454	2097600000	257060000	437550000	362440000	419920000	78771000	310090000	129070000	74808000	27843000	72330000	8864300	15088000	12498000	0.035021	0.0304361	0.0286164	3	0.0313578	0.00269468	14480000	2716200	10693000	0.0276666	0.00568645	0.02496	3	0.0194377	0.00978617	4450700
P161_RS0101585	P161_RS0101585	308	thymidylate synthase			13	13	13	10	11	1	6	3	5	4	3	3	44.5	31.435	280170000	51237000	169730000	0	39803000	3289800	2521300	4745900	7059900	1781100	20012000	3659800	12124000	0	0.0144591	0.024457	0	2	0.019458	0.0100397	2843100	234990	180090	0.00543224	0.000491959	0.000420373	3	0.00211486	0.00234593	338990
P161_RS0101590	P161_RS0101590	309	Na+ dependent nucleoside transporter			6	6	6	4	2	4	2	2	1	0	2	1	19.4	49.542	94452000	10448000	9032100	13897000	27828000	31886000	824270	0	368630	166720	6746600	746300	645150	992650	0.00294848	0.00130142	0.00227285	3	0.00217425	0.000676013	1987700	2277600	58877	0.00379785	0.00476823	0.000137433	3	0.00290117	0.00199401	0
P161_RS0101595	P161_RS0101595	310	hypothetical protein			9	9	9	7	9	2	6	6	5	4	4	4	65.5	22.789	375910000	36273000	125330000	1002300	15252000	107940000	56213000	27588000	4088500	2229100	31326000	3022800	10444000	83522	0.0119425	0.021068	0.000191239	3	0.0110672	0.00854535	1271000	8994900	4684400	0.00242847	0.0188311	0.0109345	3	0.0107314	0.0066979	2299000
P161_RS0101600	P161_RS0101600	311	electron transfer flavoprotein subunit alpha/FixB family protein			18	18	18	10	15	5	14	14	9	12	14	11	47.2	33.239	6966700000	90505000	222230000	10280000	1193600000	622670000	817830000	1633600000	1351300000	1024600000	497620000	6464600	15874000	734270	0.0255403	0.0320216	0.00168124	3	0.0197477	0.0130461	85260000	44477000	58417000	0.162904	0.0931141	0.136359	3	0.130793	0.0287623	116690000
P161_RS0101605	P161_RS0101605	312	electron transfer flavoprotein subunit beta/FixA family protein			15	15	15	10	12	4	9	8	8	10	13	10	65.3	26.636	1851300000	35528000	101740000	6995300	339840000	118190000	73107000	467990000	404640000	303310000	168300000	3229800	9249100	635940	0.0127603	0.0186576	0.0014561	3	0.010958	0.00713719	30894000	10745000	6646100	0.0590284	0.022495	0.0155136	3	0.0323457	0.0190816	42545000
P161_RS0101610	P161_RS0101610	313	pyruvate dehydrogenase complex E1 component subunit beta			24	24	24	20	21	21	15	16	17	13	13	16	76.1	36.401	22303000000	1042000000	2237800000	1080200000	1920100000	3496100000	2513400000	3890400000	3956800000	2165900000	1239000000	57890000	124320000	60012000	0.228711	0.250783	0.137408	3	0.205634	0.0490772	106670000	194230000	139640000	0.203812	0.406627	0.325953	3	0.312131	0.0833739	216130000
P161_RS0101615	P161_RS0101615	314	inorganic diphosphatase			15	15	15	8	14	6	3	5	4	5	9	5	58.3	20.367	3733800000	451610000	368450000	698550000	9814200	458810000	286610000	59439000	749420000	651140000	533400000	64516000	52635000	99793000	0.254889	0.106177	0.228494	3	0.19652	0.0647846	1402000	65544000	40944000	0.00267877	0.137219	0.0955731	3	0.0784901	0.0562382	8491200
P161_RS17885	P161_RS17885	315	sodium-translocating pyrophosphatase			17	17	17	13	14	15	15	13	14	14	12	12	24.6	79.284	2275500000	157570000	324530000	354790000	255900000	218840000	252120000	280670000	139940000	291130000	119760000	8293200	17080000	18673000	0.0327647	0.0344544	0.0427552	3	0.0366581	0.00436614	13468000	11518000	13269000	0.025733	0.0241133	0.030973	3	0.0269398	0.00292759	14772000
P161_RS0101625	P161_RS0101625	316	hypothetical protein			4	4	4	3	3	1	1	1	0	1	2	1	16.9	28.959	20690000	1098500	3271900	482620	332430	302180	0	403480	14641000	157920	1591600	84497	251680	37125	0.00033383	0.000507698	8.50044e-05	3	0.000308844	0.000173466	25572	23245	0	4.88598e-05	4.86642e-05	0	2	4.8762e-05	2.29868e-05	31037
P161_RS0101630	P161_RS0101630	317	DUF4240 domain-containing protein			6	6	6	3	4	0	1	2	1	0	1	0	24.9	35.31	5851100	2090600	3199800	0	0	97799	332850	0	130000	0	365690	130660	199990	0	0.000516211	0.000403427	0	2	0.000459819	0.000221597	0	6112.4	20803	0	1.27965e-05	4.85592e-05	2	3.06779e-05	2.055e-05	0
P161_RS0101635	P161_RS0101635	318	DUF2183 domain-containing protein			4	4	4	1	1	3	0	0	0	0	1	0	12.9	38.617	5355700	0	1094400	3587900	0	0	0	0	673370	0	334730	0	68399	224240	0	0.000137977	0.000513438	2	0.000325707	0.000216955	0	0	0	0	0	0	0	0	0	0
P161_RS0101645	P161_RS0101645	320	PA2169 family four-helix-bundle protein			9	9	9	5	5	0	0	0	0	4	2	4	55.7	17.085	116910000	14812000	30542000	0	0	0	0	69568000	834230	1157900	11691000	1481200	3054200	0	0.00585191	0.00616104	0	2	0.00600648	0.00283429	0	0	0	0	0	0	0	0	0	6956800
P161_RS0101650	P161_RS0101650	321	helix-turn-helix transcriptional regulator	TR|AraC		22	22	22	17	16	17	13	13	12	8	6	4	57.8	39.917	303870000	35911000	46983000	44087000	58134000	34685000	61697000	8296100	9867600	4208400	13212000	1561300	2042800	1916800	0.00616837	0.00412081	0.00438886	3	0.00489268	0.000908664	2527600	1508000	2682500	0.00482942	0.00315705	0.0062616	3	0.00474936	0.00126869	360700
P161_RS0101660	P161_RS0101660	323	hypothetical protein			2	2	2	1	1	1	1	1	0	2	0	1	16.4	12.671	8873300	1659600	2229800	1456500	1354700	679230	0	1090300	0	403230	2218300	414900	557440	364130	0.00163918	0.00112449	0.000833741	3	0.00119914	0.00033303	338670	169810	0	0.000647088	0.000355503	0	2	0.000501296	0.000264602	272570
P161_RS0101665	P161_RS0101665	324	YtxH domain-containing protein			8	8	8	3	6	5	1	1	1	4	0	5	42.1	13.143	19302000	1397300	7206500	3084400	764850	259060	356320	3138600	0	3094500	3216900	232890	1201100	514060	0.0009201	0.0024229	0.00117703	3	0.00150668	0.000656305	127470	43176	59387	0.000243554	9.03904e-05	0.000138624	3	0.000157523	6.39408e-05	523100
P161_RS0101680	P161_RS0101680	327	5-oxoprolinase subunit PxpA			5	5	5	3	4	1	2	1	1	1	1	1	18.4	27.848	10653000	2085300	3793200	738000	751470	355260	502490	1134300	730290	562340	760910	148950	270950	52714	0.000588471	0.00054657	0.000120698	3	0.00041858	0.000211327	53676	25376	35892	0.000102557	5.31255e-05	8.37806e-05	3	7.98212e-05	2.03738e-05	81024
P161_RS0101695	P161_RS0101695	330	phosphoenolpyruvate carboxykinase (ATP)			25	25	25	24	23	22	12	11	11	9	9	8	60.8	59.767	1743000000	81192000	288670000	405440000	191110000	205500000	163190000	229670000	131130000	47043000	58098000	2706400	9622500	13515000	0.0106924	0.0194109	0.030945	3	0.0203494	0.00829469	6370500	6849900	5439700	0.012172	0.0143405	0.0126976	3	0.01307	0.000923641	7655500
P161_RS0101705	P161_RS0101705	332	saccharopine dehydrogenase			18	18	18	13	15	11	7	3	6	4	5	3	38	51.824	235050000	22841000	112080000	30357000	18094000	2928400	21336000	8518200	15212000	3677900	9040300	878480	4310900	1167600	0.00347069	0.0086961	0.00267343	3	0.00494674	0.0026711	695900	112630	820620	0.00132964	0.000235795	0.00191552	3	0.00116032	0.00069612	327620
P161_RS0101715	P161_RS0101715	334	hypothetical protein			6	6	6	5	6	6	4	4	4	3	1	4	33.8	16.887	385290000	17378000	20690000	72529000	63648000	131630000	54012000	21204000	160680	4044000	55042000	2482600	2955700	10361000	0.00980824	0.00596235	0.0237234	3	0.0131647	0.00762945	9092600	18804000	7716000	0.017373	0.0393668	0.018011	3	0.0249169	0.0102209	3029200
P161_RS0101720	P161_RS0101720	335	glycosidase	CAZyme, multi-domain, contains two GH13_18 domains		8	8	7	4	4	1	3	2	1	0	1	2	14.3	66.842	22784000	3377100	6879000	2076600	3728800	555420	2386300	0	2666500	1114400	632890	93807	191080	57683	0.000370612	0.000385454	0.000132076	3	0.000296047	0.000116104	103580	15428	66286	0.000197908	3.2299e-05	0.000154727	3	0.000128311	7.01423e-05	0
P161_RS0101725	P161_RS0101725	336	carbohydrate kinase			5	5	5	2	4	0	2	1	0	1	2	0	19.3	34.645	5528300	916740	4173000	0	0	0	0	266590	171940	0	276410	45837	208650	0	0.000181092	0.000420896	0	2	0.000300994	0.000172387	0	0	0	0	0	0	0	0	0	13329
P161_RS0101740	P161_RS0101740	339	TonB-dependent receptor	SusC-like		10	10	10	3	3	5	1	3	3	4	6	4	15.1	93.384	34338000	2164600	2578600	16546000	173500	379840	330030	1290000	8834300	2041400	928060	58503	69692	447180	0.000231133	0.000140585	0.0010239	3	0.000465206	0.000396782	4689.3	10266	8919.7	8.95973e-06	2.14922e-05	2.08207e-05	3	1.70909e-05	5.75613e-06	34865
P161_RS17890	P161_RS17890	346	RES family NAD+ phosphorylase			3	3	3	1	2	2	0	1	0	0	0	0	10.9	40.399	7703500	924630	4892900	1638700	0	247350	0	0	0	0	427970	51368	271830	91036	0.000202944	0.000548345	0.000208443	3	0.000319911	0.000161543	0	13741	0	0	2.87672e-05	0	1	0	0	0
P161_RS0101780	P161_RS0101780	347	sce7725 family protein			13	13	13	10	11	1	3	2	2	4	5	2	41.3	35.163	257710000	13000000	50201000	1136400	68785000	160040	38357000	30065000	55228000	777120	14317000	722220	2789000	63133	0.00285334	0.00562607	0.000144554	3	0.00287466	0.00223787	3821400	8891.2	2130900	0.00730145	1.8614e-05	0.00497403	3	0.00409803	0.00303705	1670300
P161_RS0101810	P161_RS0101810	353	cadmium-translocating P-type ATPase			9	9	7	6	6	6	2	1	0	1	0	0	13.6	71.331	20010000	2817100	7440200	7977700	968800	297960	0	508170	0	0	741110	104340	275560	295470	0.000412226	0.00055587	0.000676532	3	0.000548209	0.000108038	35881	11036	0	6.85569e-05	2.31042e-05	0	2	4.58306e-05	2.84796e-05	18821
P161_RS0101820	P161_RS0101820	355	STAS/SEC14 domain-containing protein			5	5	5	4	3	0	1	0	0	0	0	0	27.7	14.19	7356500	2849500	3967500	0	539520	0	0	0	0	0	919560	356180	495940	0	0.00140719	0.00100043	0	2	0.00120381	0.00059128	67440	0	0	0.000128856	0	0	1	0	0	0
P161_RS0101840	P161_RS0101840	358	heavy metal translocating P-type ATPase			14	14	14	11	11	12	3	5	5	4	5	5	21.7	91.723	129890000	31226000	28439000	30209000	4679000	6059600	6121400	8846700	9533300	4778500	3330600	800650	729200	774590	0.0031632	0.00147097	0.00177356	3	0.00213591	0.000736834	119970	155370	156960	0.000229224	0.000325272	0.000366382	3	0.000306959	5.74726e-05	226840
P161_RS0101860	P161_RS0101860	362	ATP-binding protein			2	2	2	1	1	0	0	0	1	0	0	0	9.5	28.749	1228100	290910	403990	0	0	0	533200	0	0	0	102340	24242	33665	0	9.57751e-05	6.79103e-05	0	2	8.18427e-05	4.02232e-05	0	0	44433	0	0	0.000103717	1	0	0	0
P161_RS0101885	P161_RS0101885	367	efflux RND transporter periplasmic adaptor subunit			9	9	9	5	6	7	4	3	2	1	1	0	23.9	46.22	39798000	2748300	8291900	19966000	4472900	2345200	1371400	356910	245350	0	1809000	124920	376900	907530	0.000493533	0.000760296	0.00207795	3	0.00111059	0.000692642	203310	106600	62335	0.000388459	0.000223171	0.000145505	3	0.000252378	0.000101313	16223
P161_RS0101890	P161_RS0101890	368	CusA/CzcA family heavy metal efflux RND transporter			9	9	9	5	3	2	0	0	1	0	1	1	7.4	162.83	7880200	2515700	2921500	1596900	0	0	0	0	441250	404840	114210	36459	42341	23144	0.000144042	8.54118e-05	5.29924e-05	3	9.41487e-05	3.76807e-05	0	0	0	0	0	0	0	0	0	0
P161_RS0101915	P161_RS0101915	372	efflux RND transporter periplasmic adaptor subunit			18	18	18	15	12	13	8	6	4	7	5	7	32.8	65.631	142460000	18975000	29843000	18809000	59255000	3884100	2528300	3902000	3315000	1954400	5088000	677670	1065800	671740	0.00267733	0.00214997	0.00153807	3	0.00212179	0.000465529	2116200	138720	90298	0.00404337	0.000290415	0.000210777	3	0.00151485	0.00178823	139360
P161_RS0101920	P161_RS0101920	373	DUF305 domain-containing protein			4	4	4	3	3	2	1	1	1	1	0	1	23.8	18.97	22119000	2751900	4756700	11616000	724320	852540	435700	409550	0	571950	2457700	305770	528520	1290700	0.00120803	0.00106615	0.00295529	3	0.00174316	0.000859062	80480	94726	48412	0.000153771	0.000198312	0.000113005	3	0.000155029	3.48377e-05	45505
P161_RS0101925	P161_RS0101925	374	membrane protein			3	3	3	2	2	2	0	0	1	1	0	1	12.7	27.913	10509000	2087300	2125800	4766000	0	0	903420	522730	0	103760	1050900	208730	212580	476600	0.000824649	0.000428824	0.00109126	3	0.000781578	0.000272149	0	0	90342	0	0	0.00021088	1	0	0	52273
P161_RS0101930	P161_RS0101930	375	DUF2911 domain-containing protein			3	3	3	3	2	1	0	0	0	0	0	0	15.4	22.264	6508200	1345300	2155200	3007700	0	0	0	0	0	0	650820	134530	215520	300770	0.0005315	0.000434755	0.000688667	3	0.000551641	0.000104633	0	0	0	0	0	0	0	0	0	0
P161_RS0101935	P161_RS0101935	376	heavy metal translocating P-type ATPase			14	14	14	10	10	8	4	4	3	5	7	7	16.8	100.01	55499000	10131000	10651000	7552500	1245500	1492500	8115000	3799900	7346700	5165000	1632300	297980	313260	222130	0.00117726	0.000631919	0.000508607	3	0.000772594	0.000290535	36632	43898	238680	6.99919e-05	9.19019e-05	0.000557136	3	0.000239677	0.000224656	111760
P161_RS0101950	P161_RS0101950	379	universal stress protein			7	7	7	5	7	0	2	0	0	0	0	1	28.9	31.637	16501000	3276900	12131000	0	1092700	0	0	0	0	0	868450	172470	638480	0	0.000681393	0.00128797	0	2	0.000984679	0.000526105	57508	0	0	0.000109879	0	0	1	0	0	0
P161_RS0101975	P161_RS0101975	383	DUF3347 domain-containing protein			6	6	6	6	5	2	4	2	2	1	0	1	31.9	20.628	26964000	10878000	8069700	2150700	5365100	332850	0	0	0	166910	2074100	836810	620750	165440	0.00330606	0.0012522	0.000378805	3	0.00164569	0.00122701	412700	25604	0	0.000788536	5.36028e-05	0	2	0.000421069	0.000359751	0
P161_RS0101980	P161_RS0101980	384	multicopper oxidase domain-containing protein	CAZyme, single-domain, contains AA1 domain		9	9	9	6	7	7	2	1	1	1	2	1	12	93.837	39306000	7286800	14563000	10576000	2842400	1583800	639810	1255000	288530	271500	982650	182170	364070	264390	0.000719716	0.000734415	0.000605369	3	0.0006865	5.76815e-05	71059	39594	15995	0.000135771	8.28914e-05	3.73362e-05	3	8.53327e-05	4.02228e-05	31374
P161_RS0101990	P161_RS0101990	386	TolC family protein			10	10	10	8	4	1	1	0	1	1	1	0	30.1	46.791	14803000	5796100	6553900	770890	182960	0	81199	1262400	155760	0	616800	241500	273080	32121	0.000954116	0.000550867	7.35468e-05	3	0.000526177	0.000359915	7623.3	0	3383.3	1.45657e-05	0	7.89744e-06	2	1.12315e-05	5.95346e-06	52601
P161_RS0101995	P161_RS0101995	387	efflux RND transporter permease subunit			16	16	16	14	14	12	2	1	3	1	0	0	15.9	138.12	87534000	7840200	57433000	16881000	631420	257810	4357700	133440	0	0	1945200	174230	1276300	375130	0.000688347	0.0025746	0.000858928	3	0.00137396	0.000851833	14031	5729.2	96837	2.68087e-05	1.19943e-05	0.000226041	3	8.82813e-05	9.75983e-05	2965.3
P161_RS0102005	P161_RS0102005	389	cadmium-translocating P-type ATPase			9	7	7	6	6	7	2	3	3	2	1	3	15.3	71.315	77817000	9799300	21125000	18856000	7996700	5954800	3950500	4008900	5285700	840410	2993000	376900	812510	725230	0.00148905	0.00163902	0.00166055	3	0.00159621	7.6277e-05	307560	229030	151940	0.000587647	0.000479482	0.000354664	3	0.000473931	9.51958e-05	154190
P161_RS0102020	P161_RS0102020	393	efflux RND transporter periplasmic adaptor subunit			11	11	11	8	7	5	4	2	2	3	2	2	32	44.555	90748000	12964000	31719000	29112000	3381700	1750900	2209000	3183700	3614900	2813100	3629900	518580	1268700	1164500	0.0020488	0.00255927	0.00266633	3	0.0024248	0.00026944	135270	70035	88359	0.000258457	0.000146621	0.000206251	3	0.000203776	4.56906e-05	127350
P161_RS0102025	P161_RS0102025	394	CusA/CzcA family heavy metal efflux RND transporter			14	14	14	8	9	8	3	0	0	1	1	1	10.4	160.52	26309000	6412600	9669400	6517300	3475900	0	0	233610	0	0	487200	118750	179060	120690	0.000469157	0.000361206	0.000276342	3	0.000368902	7.89043e-05	64369	0	0	0.000122988	0	0	1	0	0	4326.1
P161_RS0102045	P161_RS0102045	398	16S rRNA processing protein RimM			4	4	4	3	3	1	1	1	0	0	3	1	27.4	20.201	60262000	4102500	8834400	450050	505100	352650	0	0	35560000	10457000	7532800	512810	1104300	56256	0.00202601	0.00222763	0.000128808	3	0.00146082	0.000945462	63138	44081	0	0.000120636	9.2285e-05	0	2	0.000106461	5.15034e-05	0
P161_RS0102050	P161_RS0102050	399	30S ribosomal protein S16			17	17	17	14	16	8	11	11	8	6	11	6	83.7	19.149	13361000000	1701500000	1760600000	2437100000	1330600000	1343000000	886560000	1218000000	1303000000	1380500000	1908700000	243070000	251510000	348150000	0.960319	0.507355	0.797152	3	0.754942	0.187315	190090000	191860000	126650000	0.3632	0.401665	0.295632	3	0.353499	0.0438283	174010000
P161_RS0102055	P161_RS0102055	400	PA2169 family four-helix-bundle protein			4	4	4	1	2	1	0	0	0	0	0	0	44.6	17.17	1314300	0	1314300	0	0	0	0	0	0	0	164280	0	164280	0	0	0.000331392	0	1	0	0	0	0	0	0	0	0	0	0	0	0
P161_RS0102060	P161_RS0102060	401	DNA polymerase III subunit alpha			41	41	41	26	34	29	8	10	6	3	1	2	27.9	163.23	174940000	17646000	44596000	44804000	17960000	16060000	2357900	2141400	0	29378000	2058200	207600	524660	527110	0.000820185	0.00105836	0.00120691	3	0.00102849	0.000159289	211300	188940	27740	0.000403726	0.000395552	6.47518e-05	3	0.00028801	0.000157903	25193
P161_RS0102070	P161_RS0102070	403	HAD family phosphatase			5	5	5	3	4	0	0	0	0	0	0	0	31.5	23.933	14095000	5218100	8876500	0	0	0	0	0	0	0	1084200	401400	682810	0	0.00158585	0.00137739	0	2	0.00148162	0.000703607	0	0	0	0	0	0	0	0	0	0
P161_RS0102075	P161_RS0102075	404	gliding motility-associated ABC transporter ATP-binding subunit GldA			9	9	9	5	7	1	5	3	4	4	4	1	34.2	34.346	142590000	6616100	67355000	372250	7144900	3593400	5219900	1388300	50407000	488620	8911600	413510	4209700	23266	0.00163369	0.00849196	5.32717e-05	3	0.00339297	0.0036628	446560	224590	326250	0.000853231	0.000470187	0.000761546	3	0.000694988	0.000163306	86769
P161_RS0102085	P161_RS0102085	406	outer membrane beta-barrel protein	putative SusC-like		31	31	31	24	26	29	12	8	9	9	15	12	41.9	104.81	1682500000	83687000	261010000	271060000	176220000	108960000	125550000	130640000	326900000	198420000	41036000	2041100	6366200	6611200	0.00806396	0.0128421	0.0151375	3	0.0120145	0.00294647	4298100	2657700	3062200	0.00821227	0.00556398	0.00714791	3	0.00697472	0.00108807	3186400
P161_RS0102090	P161_RS0102090	407	GLPGLI family protein			19	19	19	13	16	2	9	8	8	8	7	8	47.3	31.566	229380000	27093000	75572000	824090	41157000	8225600	22507000	23821000	19137000	11046000	16384000	1935200	5398000	58864	0.00764557	0.010889	0.00013478	3	0.00622313	0.00450415	2939800	587540	1607600	0.005617	0.00123003	0.00375252	3	0.00353319	0.00179768	1701500
P161_RS0102095	P161_RS0102095	408	GLPGLI family protein			6	6	6	1	1	1	2	1	1	1	1	1	23.2	31.455	2206500	223030	787490	151920	392740	155650	80933	81942	49949	282840	200590	20275	71590	13811	8.01023e-05	0.000144414	3.16228e-05	3	8.53797e-05	4.61978e-05	35704	14150	7357.5	6.82188e-05	2.96235e-05	1.71742e-05	3	3.83388e-05	2.1731e-05	7449.3
P161_RS0102110	P161_RS0102110	411	response regulator transcription factor	RR|OmpR		5	5	5	4	5	1	0	2	1	1	1	1	28	26.012	14875000	3143700	7134400	1340000	0	1244400	804490	853290	354580	0	1144200	241830	548800	103070	0.00095542	0.00110706	0.000235997	3	0.000766159	0.000379958	0	95726	61884	0	0.000200406	0.000144452	2	0.000172429	8.44325e-05	65637
P161_RS0102115	P161_RS0102115	412	deoxynucleoside kinase			14	14	14	9	12	1	9	5	7	5	7	5	74	23.866	1583000000	120540000	614530000	0	189960000	204970000	199310000	93695000	96356000	63668000	143910000	10958000	55867000	0	0.0432928	0.112697	0	2	0.0779949	0.0464182	17269000	18634000	18119000	0.0329955	0.0390109	0.0422941	3	0.0381002	0.00385039	8517800
P161_RS0102125	P161_RS0102125	414	hypothetical protein			4	4	4	0	3	0	1	1	1	0	0	0	41.2	15.035	16429000	0	5957700	0	4352700	3396400	2722600	0	0	0	3285900	0	1191500	0	0	0.00240354	0	1	0	0	870540	679270	544530	0.00166332	0.00142207	0.00127106	3	0.00145215	0.000161544	0
P161_RS0102130	P161_RS0102130	415	16S rRNA (guanine(527)-N(7))-methyltransferase RsmG			12	12	12	10	10	0	5	4	4	3	3	2	69.4	23.69	244480000	12160000	121820000	0	19535000	18004000	36976000	34506000	771060	708460	22226000	1105500	11075000	0	0.0043676	0.0223409	0	2	0.0133542	0.00966799	1775900	1636700	3361500	0.00339317	0.00342649	0.00784655	3	0.00488873	0.00209153	3136900
P161_RS0102135	P161_RS0102135	416	acyl-CoA desaturase			3	3	3	2	2	3	0	0	0	0	0	0	8	42.294	12349000	1627800	5074900	5646700	0	0	0	0	0	0	1372100	180860	563880	627410	0.00071454	0.00113748	0.00143657	3	0.0010962	0.000296209	0	0	0	0	0	0	0	0	0	0
P161_RS0102140	P161_RS0102140	417	pyridoxal phosphate-dependent aminotransferase			23	23	23	18	18	22	17	17	18	18	17	16	69.7	41.454	15215000000	1112100000	1778400000	1537000000	1737400000	1611700000	1923300000	1831600000	2359800000	1323400000	760730000	55605000	88918000	76852000	0.219684	0.179369	0.175967	3	0.191673	0.0198553	86868000	80586000	96163000	0.165977	0.168709	0.224468	3	0.186385	0.0269519	91580000
P161_RS0102155	P161_RS0102155	420	cell division protein FtsZ			26	26	26	19	22	21	13	16	9	7	6	6	47.9	68.789	350000000	56308000	79428000	105690000	25416000	63276000	5632100	7716300	3870200	2658700	10937000	1759600	2482100	3302900	0.00695181	0.00500698	0.00756259	3	0.00650713	0.00108967	794240	1977400	176000	0.00151753	0.00413975	0.000410826	3	0.0020227	0.00156368	241140
P161_RS0102160	P161_RS0102160	421	cell division protein FtsA			25	25	25	14	19	18	15	14	13	10	9	12	70.1	48.744	3577100000	69919000	324000000	669040000	483880000	767530000	528310000	309500000	269400000	155560000	155530000	3039900	14087000	29089000	0.01201	0.0284168	0.0666045	3	0.0356771	0.0228717	21038000	33371000	22970000	0.0401968	0.0698633	0.0536175	3	0.0545592	0.0121296	13457000
P161_RS0102165	P161_RS0102165	422	hypothetical protein			12	12	12	7	12	1	5	4	2	2	2	2	51.5	27.788	82818000	7069000	71038000	1007300	1122500	1251500	469600	719610	140180	0	5915600	504930	5074200	71950	0.00199487	0.0102359	0.000164743	3	0.00413183	0.00438039	80176	89393	33543	0.00015319	0.000187147	7.82974e-05	3	0.000139545	4.54732e-05	51401
P161_RS0102170	P161_RS0102170	423	UDP-N-acetylmuramate--L-alanine ligase			14	14	14	5	11	10	5	5	3	3	3	4	37.8	51.883	209490000	8139200	30334000	34226000	44030000	11872000	5640500	58756000	14775000	1716500	10474000	406960	1516700	1711300	0.00160781	0.00305954	0.00391833	3	0.0028619	0.000953561	2201500	593590	282020	0.00420635	0.0012427	0.000658302	3	0.00203578	0.00155325	2937800
P161_RS0102175	P161_RS0102175	424	undecaprenyldiphospho-muramoylpentapeptide beta-N-acetylglucosaminyltransferase	CAZyme, single-domain, contains GT28 domain		16	16	16	10	10	10	6	5	5	3	5	5	48.2	40.913	110080000	14130000	20965000	13666000	16705000	14702000	15278000	8001500	3898000	2734300	5503900	706480	1048200	683300	0.00279116	0.00211447	0.00156454	3	0.00215672	0.000501655	835240	735080	763880	0.00159587	0.00153891	0.00178308	3	0.00163929	0.0001043	400070
P161_RS0102185	P161_RS0102185	426	UDP-N-acetylmuramoyl-L-alanine--D-glutamate ligase			12	12	12	6	8	8	5	1	1	2	2	3	30.8	51.315	96951000	3590800	14278000	30685000	11332000	4176800	7433800	13077000	8202100	4176600	4039600	149620	594900	1278500	0.000591118	0.00120005	0.00292736	3	0.00157284	0.000989522	472160	174030	309740	0.000902144	0.000364338	0.000723008	3	0.000663163	0.000223599	544860
P161_RS0102190	P161_RS0102190	427	phospho-N-acetylmuramoyl-pentapeptide-transferase			4	4	4	4	3	0	3	2	1	3	3	3	9.3	45.432	25822000	4936800	10248000	0	2170500	1882800	794060	2784900	1726300	1278300	1518900	290400	602820	0	0.00114731	0.00121603	0	2	0.00118167	0.000557751	127670	110750	46710	0.000243936	0.000231859	0.000109032	3	0.000194942	6.09473e-05	163820
P161_RS0102195	P161_RS0102195	428	UDP-N-acetylmuramoyl-L-alanyl-D-glutamate--2,6-diaminopimelate ligase			14	14	14	6	9	11	3	6	4	3	3	3	36.1	54.178	97288000	6821500	45346000	25085000	2342900	6784300	3912500	3109700	3093700	791940	3741800	262360	1744100	964790	0.00103653	0.00351826	0.00220906	3	0.00225462	0.00101367	90112	260940	150480	0.000172175	0.000546287	0.000351256	3	0.000356573	0.000152777	119600
P161_RS0102200	P161_RS0102200	429	transpeptidase family protein			15	15	15	12	12	12	5	6	4	2	3	6	27	73.624	62365000	11342000	18028000	17209000	4532000	5301200	2559400	1410300	865910	1117800	1732400	315060	500770	478030	0.00124474	0.00101017	0.00109454	3	0.00111648	9.701e-05	125890	147250	71094	0.000240535	0.000308273	0.00016595	3	0.000238253	5.81252e-05	39175
P161_RS0102210	P161_RS0102210	431	16S rRNA (cytosine(1402)-N(4))-methyltransferase RsmH			15	15	15	10	14	1	3	2	4	1	2	1	51.7	34.761	661130000	43606000	232730000	2871200	62603000	55890000	65299000	89101000	108850000	182240	41320000	2725400	14546000	179450	0.0107675	0.0293427	0.000410883	3	0.013507	0.0119692	3912700	3493100	4081200	0.0074759	0.00731292	0.0095265	3	0.00810511	0.00100728	5568800
P161_RS0102215	P161_RS0102215	432	division/cell wall cluster transcriptional repressor MraZ			7	7	7	4	5	3	2	2	2	1	1	2	38.7	17.737	28452000	8856200	7128600	6587900	2499200	1391900	747500	387410	154460	698380	3161300	984020	792060	731990	0.00388766	0.00159777	0.00167602	3	0.00238715	0.0010615	277690	154660	83055	0.000530575	0.000323786	0.00019387	3	0.000349411	0.000138648	43045
P161_RS0102225	P161_RS0102225	433	alpha/beta hydrolase			14	14	14	9	13	1	7	5	5	9	11	6	46.9	28.584	1558700000	94911000	286610000	0	354400000	2736400	203100000	206950000	297080000	112920000	119900000	7300900	22047000	0	0.0288443	0.044474	0	2	0.0366592	0.0184217	27262000	210490	15623000	0.0520888	0.000440668	0.0364678	3	0.0296658	0.0216269	15919000
P161_RS0102230	P161_RS0102230	434	YihA family ribosome biogenesis GTP-binding protein			7	7	7	3	5	3	3	1	1	1	2	2	36	23.479	52689000	1103200	11640000	1012000	1898400	1703400	700810	14959000	16947000	2725100	5268900	110320	1164000	101200	0.000435851	0.00234806	0.000231716	3	0.00100521	0.000953191	189840	170340	70081	0.000362723	0.000356612	0.000163586	3	0.000294307	9.24674e-05	1495900
P161_RS0102245	P161_RS0102245	437	nitroreductase family protein			3	3	3	2	3	0	2	2	1	2	1	2	14.3	27.941	29596000	3584200	10316000	0	2795500	606170	324330	9926500	1060600	982790	2959600	358420	1031600	0	0.00141604	0.00208098	0	2	0.00174851	0.000867807	279550	60617	32433	0.000534129	0.000126904	7.57064e-05	3	0.00024558	0.000205103	992650
P161_RS0102250	P161_RS0102250	438	hypothetical protein			6	6	6	2	5	0	4	3	3	0	0	0	35.6	24.278	102440000	616670	32494000	0	33783000	23939000	11608000	0	0	0	7317200	44048	2321000	0	0.000174025	0.00468201	0	2	0.00242802	0.00216727	2413100	1709900	829170	0.00461065	0.00357973	0.00193548	3	0.00337529	0.00110166	0
P161_RS0102260	P161_RS0102260	440	penicillin acylase family protein			19	19	19	13	14	14	6	6	2	1	1	4	28.6	89.795	104160000	12679000	34319000	28885000	9422200	12985000	2517400	564170	757210	2034200	2367300	288170	779970	656470	0.0011385	0.00157338	0.00150311	3	0.001405	0.000190613	214140	295110	57215	0.000409152	0.000617823	0.000133554	3	0.000386843	0.00019833	12822
P161_RS0102265	P161_RS0102265	441	DegT/DnrJ/EryC1/StrS family aminotransferase			18	18	18	15	17	15	10	11	12	11	13	13	59.7	43.069	1986700000	265020000	406450000	395660000	179850000	82226000	154130000	117520000	265760000	120070000	110370000	14723000	22581000	21981000	0.0581675	0.0455512	0.0503295	3	0.0513494	0.00520083	9991700	4568100	8562600	0.0190909	0.00956347	0.0199872	3	0.0162138	0.00471674	6529000
P161_RS0102270	P161_RS0102270	442	UDP-glucose 4-epimerase GalE			34	34	34	28	26	28	21	23	22	20	20	21	72.7	37.263	35423000000	2976700000	5300900000	4438700000	4056900000	4270800000	3072400000	4626900000	3903100000	2776600000	2083700000	175100000	311820000	261100000	0.691784	0.629015	0.597836	3	0.639545	0.0390703	238640000	251230000	180730000	0.455964	0.525958	0.421867	3	0.46793	0.0433292	272170000
P161_RS0102275	P161_RS0102275	443	DUF2911 domain-containing protein			7	7	7	6	7	4	1	1	0	0	0	0	48.9	20.024	689100000	95911000	232590000	360220000	375980	0	0	0	0	0	114850000	15985000	38766000	60037000	0.0631534	0.0782002	0.137466	3	0.0929397	0.0320782	62663	0	0	0.000119729	0	0	1	0	0	0
P161_RS0102285	P161_RS0102285	445	ferrous iron transport protein B			25	25	25	21	22	24	9	8	7	7	6	10	41.5	77.952	770490000	149410000	217760000	232780000	64391000	11304000	8560800	52528000	4510800	29239000	24078000	4669200	6805100	7274400	0.018447	0.0137275	0.0166561	3	0.0162769	0.00194531	2012200	353250	267530	0.00384466	0.000739541	0.000624479	3	0.00173623	0.00149163	1641500
P161_RS0102295	P161_RS0102295	447	SCO family protein			6	6	6	4	5	0	0	0	1	1	0	1	26.1	26.5	51797000	28756000	18286000	0	0	0	4462400	292970	0	0	5179700	2875600	1828600	0	0.0113609	0.00368872	0	2	0.00752481	0.00473215	0	0	446240	0	0	0.00104163	1	0	0	29297
P161_RS0102300	P161_RS0102300	448	RIP metalloprotease RseP			21	21	21	18	21	16	7	7	6	9	9	8	38.5	51.351	405060000	35263000	191460000	57460000	27301000	24904000	12878000	30083000	20252000	5463000	18412000	1602900	8702800	2611800	0.00633273	0.0175556	0.00598019	3	0.00995617	0.00537554	1241000	1132000	585350	0.00237115	0.00236988	0.00136635	3	0.00203579	0.000473369	1367400
P161_RS0102310	P161_RS0102310	450	cupin			15	15	15	13	13	1	3	1	1	1	1	0	39.2	33.786	54819000	14283000	35176000	576380	3544500	308800	0	322300	608570	0	3224700	840160	2069200	33905	0.0033193	0.00417407	7.76316e-05	3	0.00252367	0.00176446	208500	18165	0	0.000398376	3.8029e-05	0	2	0.000218202	0.000179505	18959
P161_RS0102315	P161_RS0102315	451	biotin synthase BioB			15	15	15	13	13	11	5	5	5	0	1	0	55.1	40.833	254170000	44725000	119150000	77921000	5063800	5019800	2291400	0	0	0	14951000	2630900	7009100	4583600	0.0103941	0.014139	0.010495	3	0.011676	0.00174207	297870	295280	134790	0.000569133	0.000618178	0.000314632	3	0.000500648	0.000133048	0
P161_RS0102320	P161_RS0102320	452	AAA domain-containing protein			44	44	44	25	33	31	10	15	13	17	13	7	31	186.48	487340000	15069000	67398000	71579000	25947000	50935000	21705000	101410000	111320000	21979000	5076500	156970	702060	745620	0.000620156	0.00141622	0.00170723	3	0.00124787	0.000459485	270280	530570	226100	0.000516417	0.00111077	0.000527772	3	0.000718318	0.000277541	1056300
P161_RS0102325	P161_RS0102325	453	hypothetical protein			50	50	50	43	42	40	18	18	19	14	13	16	58.9	76.861	1438600000	271370000	349780000	185170000	220610000	117190000	117220000	100070000	23006000	54196000	38881000	7334500	9453500	5004500	0.0289771	0.0190699	0.0114587	3	0.0198352	0.00717229	5962400	3167300	3168100	0.0113922	0.00663085	0.00739511	3	0.00847272	0.00208784	2704500
P161_RS0102330	P161_RS0102330	454	hypothetical protein			7	7	7	5	7	0	3	1	0	1	1	0	35.8	25.25	106450000	3776800	42013000	0	33036000	26647000	0	772460	206700	0	13306000	472100	5251700	0	0.00186517	0.0105939	0	2	0.00622954	0.00461761	4129500	3330800	0	0.00789013	0.00697314	0	2	0.00743164	0.00352325	96558
P161_RS0102335	P161_RS0102335	455	phage-shock protein			5	5	5	3	4	0	0	0	0	0	0	0	26.4	26.535	6116200	1782200	4334000	0	0	0	0	0	0	0	470480	137090	333390	0	0.000541614	0.000672526	0	2	0.00060707	0.000291123	0	0	0	0	0	0	0	0	0	0
P161_RS0102345	P161_RS0102345	457	helix-turn-helix transcriptional regulator	TR|Xre		9	9	9	7	9	0	2	1	1	3	4	0	36.5	29.067	45616000	8197600	30064000	0	1722100	533930	2201500	1502500	1394900	0	3801400	683130	2505300	0	0.00269891	0.00505378	0	2	0.00387634	0.00206479	143500	44494	183460	0.000274182	9.31497e-05	0.00042824	3	0.00026519	0.000136948	125200
P161_RS0102355	P161_RS0102355	459	phytoene desaturase			10	10	10	3	6	8	3	3	3	1	2	2	25.4	54.805	31864000	999150	15633000	10267000	1655100	680500	488780	1113500	716110	311010	1448300	45416	710590	466660	0.000179429	0.00143343	0.0010685	3	0.000893787	0.000526639	75231	30932	22217	0.000143742	6.47572e-05	5.18598e-05	3	8.67863e-05	4.06165e-05	50615
P161_RS0102365	P161_RS0102365	461	beta-ketoacyl synthase			5	5	5	4	3	2	1	0	0	2	1	2	18.1	43.221	31948000	2014800	2297600	1588600	0	0	0	12470000	10243000	3333600	2662300	167900	191470	132390	0.000663338	0.00038624	0.000303131	3	0.000450903	0.000153998	0	0	0	0	0	0	0	0	0	1039200
P161_RS0102370	P161_RS0102370	462	adenosylmethionine--8-amino-7-oxononanoate transaminase			16	16	16	12	13	6	2	3	1	5	7	6	43.7	47.596	305860000	30923000	48511000	4202000	2043900	1136000	750030	32670000	132050000	53576000	13903000	1405600	2205000	191000	0.00555323	0.00444801	0.000437329	3	0.00347952	0.00219797	92906	51637	34092	0.000177513	0.000108104	7.95789e-05	3	0.000121732	4.11264e-05	1485000
P161_RS17910	P161_RS17910	463	pyridoxal phosphate-dependent aminotransferase family protein			6	6	6	3	1	2	3	0	1	0	2	1	22.2	44.822	7474600	2344000	1439100	1750300	1154600	0	0	0	522720	263870	439680	137890	84653	102960	0.000544775	0.000170765	0.000235746	3	0.000317095	0.000163165	67915	0	0	0.000129764	0	0	1	0	0	0
P161_RS0102380	P161_RS0102380	464	hypothetical protein			3	3	3	2	3	0	0	0	0	0	0	0	26.4	14.38	2749100	1684000	1065000	0	0	0	0	0	0	0	343630	210510	133130	0	0.000831681	0.000268555	0	2	0.000550118	0.000346559	0	0	0	0	0	0	0	0	0	0
P161_RS0102385	P161_RS0102385	465	dethiobiotin synthase			9	9	9	7	7	0	4	4	3	3	3	1	45.3	22.729	228380000	14714000	33840000	0	46650000	74428000	45607000	8397200	4415800	328660	22838000	1471400	3384000	0	0.0058132	0.00682633	0	2	0.00631976	0.00300774	4665000	7442800	4560700	0.0089133	0.0155817	0.0106458	3	0.0117136	0.00282516	839720
P161_RS0102430	P161_RS0102430	473	S9 family peptidase	*		37	37	37	29	30	28	18	17	19	19	24	20	41.6	96.981	1654300000	93694000	162790000	153580000	336120000	128670000	120110000	261320000	253130000	144840000	35197000	1993500	3463700	3267600	0.00787591	0.0069871	0.00748176	3	0.00744826	0.000363625	7151500	2737700	2555600	0.0136642	0.00573147	0.00596538	3	0.00845368	0.00368563	5560000
P161_RS0102440	P161_RS0102440	475	1-deoxy-D-xylulose-5-phosphate synthase			13	13	13	9	10	9	4	1	0	1	2	3	24.3	64.933	59474000	9188100	20437000	21793000	2906100	304500	0	417050	1326700	3101900	2478100	382840	851540	908050	0.00151252	0.00171776	0.00207914	3	0.00176981	0.000234233	121090	12687	0	0.000231364	2.65607e-05	0	2	0.000128962	0.000103376	17377
P161_RS0102450	P161_RS0102450	477	hypothetical protein			7	7	7	6	5	3	2	4	1	3	0	3	43.8	16.711	64353000	12845000	4631200	7633800	3488100	4483700	747820	27332000	0	3190800	9193300	1835100	661600	1090500	0.0072501	0.0013346	0.0024969	3	0.00369387	0.00255901	498310	640530	106830	0.000952109	0.00134097	0.000249367	3	0.000847482	0.000451745	3904600
P161_RS0102455	P161_RS0102455	478	T9SS type A sorting domain-containing protein			35	35	35	32	29	33	21	20	21	17	19	17	48.4	98.889	3366700000	268210000	558160000	472420000	545620000	444940000	513320000	186120000	249450000	128490000	80160000	6385900	13290000	11248000	0.0252294	0.0268091	0.0257543	3	0.0259309	0.000656889	12991000	10594000	12222000	0.0248216	0.0221789	0.0285291	3	0.0251765	0.00260458	4431500
P161_RS0102460	P161_RS0102460	479	deoxyguanosinetriphosphate triphosphohydrolase			20	20	20	14	14	11	7	4	9	6	9	10	46.8	50.627	477910000	20808000	162780000	53062000	30297000	12308000	64057000	30677000	51016000	52905000	23895000	1040400	8138800	2653100	0.0041104	0.0164179	0.00607475	3	0.00886768	0.00539869	1514900	615410	3202900	0.00289448	0.00128838	0.00747634	3	0.0038864	0.00262178	1533900
P161_RS0102465	P161_RS0102465	480	HTH domain-containing protein	TR|LexA		13	13	13	6	6	4	3	3	2	2	1	1	33	51.144	65824000	4379900	44433000	7407900	4490000	1092400	1473500	607900	1269000	670030	2861900	190430	1931900	322080	0.000752349	0.0038971	0.00073746	3	0.00179564	0.00148597	195220	47496	64064	0.000373002	9.94345e-05	0.000149541	3	0.000207326	0.000118923	26430
P161_RS0102470	P161_RS0102470	481	ribonucleoside-diphosphate reductase subunit alpha			32	32	32	25	25	29	15	13	11	8	8	10	57.3	67.278	1766900000	220050000	396210000	513680000	282010000	203990000	66317000	45295000	10785000	28585000	67958000	8463300	15239000	19757000	0.0334367	0.0307407	0.0452372	3	0.0364715	0.00629524	10846000	7845900	2550700	0.0207232	0.0164257	0.00595395	3	0.0143676	0.00620265	1742100
P161_RS0102475	P161_RS0102475	482	ribonucleotide reductase			42	42	42	32	38	32	32	22	21	15	12	15	74.5	49.311	8271300000	562770000	1671200000	1493600000	2333800000	580530000	1042200000	276890000	198440000	111810000	318130000	21645000	64278000	57446000	0.0855149	0.129664	0.131533	3	0.115571	0.0212663	89762000	22328000	40085000	0.171506	0.0467444	0.093568	3	0.103939	0.051459	10650000
P161_RS0102480	P161_RS0102480	483	cold shock domain-containing protein			5	5	5	3	3	3	4	3	2	1	1	4	50.8	7.0578	125080000	4371200	8582900	5527800	4563200	3790300	652370	724470	0	96867000	41693000	1457100	2861000	1842600	0.0057567	0.00577131	0.00421897	3	0.00524899	0.000728364	1521100	1263400	217460	0.00290633	0.00264497	0.000507604	3	0.00201963	0.00107448	241490
P161_RS0102485	P161_RS0102485	484	cytochrome oxidase assembly protein			4	4	4	2	3	1	0	0	0	0	0	0	9.7	39.394	4147100	1038100	3109000	0	0	0	0	0	0	0	259190	64883	194310	0	0.000256339	0.000391969	0	2	0.000324154	0.00016253	0	0	0	0	0	0	0	0	0	0
P161_RS0102490	P161_RS0102490	485	NAD(P)-binding protein			13	13	13	8	8	5	5	4	5	4	8	4	30.9	47.803	127630000	17743000	51674000	4349100	12179000	2257600	5442400	21211000	8510500	4266800	6381700	887170	2583700	217450	0.00350502	0.00521193	0.000497891	3	0.00307162	0.00194875	608950	112880	272120	0.00116351	0.000236318	0.000635193	3	0.000678339	0.00037975	1060500
P161_RS0102500	P161_RS0102500	487	GatB/YqeY domain-containing protein			7	7	7	6	7	5	3	4	2	3	0	5	27.5	16.403	53737000	11242000	23251000	6803900	2917200	2401200	859670	2995000	0	3266400	5970800	1249100	2583500	755990	0.00493494	0.00521153	0.00173098	3	0.00395915	0.0015796	324140	266790	95519	0.000619326	0.000558534	0.000222964	3	0.000466941	0.000174294	332780
P161_RS0102505	P161_RS0102505	488	clan AA aspartic protease			2	2	2	1	2	2	0	1	1	1	2	1	19.5	16.742	13325000	3458700	3507100	1503000	0	525820	417680	1340400	920420	1651900	2665000	691730	701410	300600	0.00273288	0.00141491	0.000688278	3	0.00161202	0.000846263	0	105160	83536	0	0.000220156	0.000194993	2	0.000207575	9.83893e-05	268070
P161_RS0102520	P161_RS0102520	490	NADH:ubiquinone reductase (Na(+)-transporting) subunit F			27	27	27	20	23	23	16	13	14	18	16	14	65.6	48.607	4355900000	220160000	564540000	817290000	769610000	349180000	430490000	524370000	565590000	114620000	197990000	10007000	25661000	37150000	0.0395356	0.0517643	0.0850616	3	0.0587872	0.0192379	34982000	15872000	19568000	0.0668392	0.0332286	0.0456764	3	0.0485814	0.0138744	23835000
P161_RS0102530	P161_RS0102530	492	NADH:ubiquinone reductase (Na(+)-transporting) subunit D			3	3	3	2	2	2	1	1	1	2	2	2	18.7	22.994	80202000	2312500	11055000	8070700	1007600	671710	336920	3538400	29857000	23352000	10025000	289060	1381900	1008800	0.00114202	0.00278762	0.00230983	3	0.00207982	0.000691221	125950	83964	42114	0.00024065	0.000175781	9.83042e-05	3	0.000171578	5.81882e-05	442300
P161_RS0102535	P161_RS0102535	493	Na(+)-translocating NADH-quinone reductase subunit C			19	19	19	14	17	6	12	10	9	11	12	8	58.4	30.077	12265000000	897970000	1654900000	46552000	2018000000	1225600000	1345600000	1832700000	1868800000	1374800000	943450000	69075000	127300000	3580900	0.272901	0.256794	0.00819912	3	0.179298	0.121164	155230000	94278000	103510000	0.296594	0.197374	0.241617	3	0.245195	0.0405853	140980000
P161_RS0102540	P161_RS0102540	494	NADH:ubiquinone reductase (Na(+)-transporting) subunit B			2	2	2	1	2	1	1	0	0	1	1	0	6.6	44.821	32071000	321400	30122000	528530	528290	0	0	231370	338980	0	3563400	35711	3346900	58726	0.000141087	0.00675149	0.000134464	3	0.00234235	0.00311774	58699	0	0	0.000112155	0	0	1	0	0	25708
P161_RS0102545	P161_RS0102545	495	Na(+)-translocating NADH-quinone reductase subunit A			32	32	32	21	29	29	22	20	20	22	22	20	78.4	49.343	17646000000	489140000	1898700000	1886900000	2181500000	2638000000	2041500000	2789500000	2554600000	1165900000	678680000	18813000	73026000	72572000	0.0743263	0.147311	0.166167	3	0.129268	0.0396049	83905000	101460000	78519000	0.160315	0.21241	0.183282	3	0.185336	0.0213171	107290000
P161_RS0102550	P161_RS0102550	496	DUF5103 domain-containing protein			10	10	10	10	8	3	5	4	6	3	7	7	28.9	47.71	443780000	36833000	46589000	59371000	25083000	3588100	74745000	6824600	147800000	42945000	21132000	1753900	2218500	2827200	0.0069293	0.00447524	0.00647338	3	0.00595931	0.00106577	1194400	170860	3559300	0.00228211	0.000357701	0.00830826	3	0.00364936	0.00338673	324980
P161_RS0102560	P161_RS0102560	498	DUF3667 domain-containing protein			2	2	2	1	0	0	1	1	1	1	1	1	4.7	44.874	3417600	488300	0	0	306160	88494	374040	912450	987100	261100	189870	27128	0	0	0.000107177	0	0	1	0	0	17009	4916.3	20780	3.24987e-05	1.02924e-05	4.85055e-05	3	3.04322e-05	1.56687e-05	50692
P161_RS0102570	P161_RS0102570	500	L-glutamate gamma-semialdehyde dehydrogenase			39	39	39	26	33	33	30	30	28	27	25	26	71.7	59.714	12974000000	211440000	882460000	1072600000	1943100000	2164000000	1394700000	2395900000	2045300000	864220000	418510000	6820500	28467000	34599000	0.0269464	0.0574247	0.0792207	3	0.0545306	0.0214388	62680000	69806000	44991000	0.119761	0.146141	0.10502	3	0.123641	0.0170104	77286000
P161_RS0102580	P161_RS0102580	502	hypothetical protein			4	4	4	3	3	2	2	2	1	1	1	1	18.7	25.36	49565000	3695600	10469000	14573000	4327500	13335000	435750	1416700	652590	660350	8260900	615940	1744800	2428900	0.00243345	0.00351967	0.00556141	3	0.00383818	0.00129669	721250	2222500	72625	0.00137807	0.00465288	0.000169524	3	0.00206683	0.00189401	236120
P161_RS17915	P161_RS17915	503	T9SS type A sorting domain-containing protein			11	11	11	8	8	8	8	7	6	7	8	5	14	136.46	429160000	26395000	84204000	72683000	41843000	34941000	13953000	38762000	100910000	15471000	13844000	851460	2716200	2344600	0.00336394	0.00547922	0.00536838	3	0.00473718	0.000972081	1349800	1127100	450090	0.00257903	0.00235962	0.00105062	3	0.00199642	0.000674757	1250400
P161_RS0102590	P161_RS0102590	504	lipoyl(octanoyl) transferase LipB			7	7	7	6	6	0	3	2	1	2	2	1	32.9	26.795	292190000	19642000	63847000	0	76721000	17207000	42197000	10564000	27048000	34967000	29219000	1964200	6384700	0	0.00776015	0.0128794	0	2	0.0103198	0.00529473	7672100	1720700	4219700	0.0146589	0.00360234	0.00984979	3	0.00937034	0.00452653	1056400
P161_RS0102600	P161_RS0102600	506	nucleoid-associated protein			13	13	13	10	11	10	3	5	5	3	4	0	43.1	41.03	260870000	35682000	90931000	95692000	4442300	23391000	6111400	1424500	3195800	0	11858000	1621900	4133200	4349600	0.00640779	0.00833764	0.00995919	3	0.00823488	0.00145167	201920	1063200	277790	0.000385804	0.00222584	0.000648429	3	0.00108669	0.000812606	64752
P161_RS0102605	P161_RS0102605	507	ribonuclease HII			3	3	3	0	2	0	1	0	0	0	0	0	17.6	22.765	1298300	0	1298300	0	0	0	0	0	0	0	129830	0	129830	0	0	0.000261898	0	1	0	0	0	0	0	0	0	0	0	0	0	0
P161_RS0102610	P161_RS0102610	508	putative porin			17	17	17	12	14	16	10	7	9	7	6	8	29.9	75.591	165130000	23341000	38314000	40064000	21028000	7874400	17727000	7268300	3902900	5608400	5504200	778020	1277100	1335500	0.0030738	0.00257621	0.00305787	3	0.00290263	0.0002309	700940	262480	590900	0.00133927	0.000549511	0.0013793	3	0.00108936	0.000382081	242280
P161_RS18925	P161_RS18925	509	hypothetical protein			2	2	2	1	1	0	1	1	0	0	0	0	9.6	24.772	1786600	0	1559300	0	146410	80953	0	0	0	0	127620	0	111380	0	0	0.00022468	0	1	0	0	10458	5782.3	0	1.99818e-05	1.21054e-05	0	2	1.60436e-05	8.21823e-06	0
P161_RS0102630	P161_RS0102630	512	cytochrome P450			7	7	7	4	7	0	1	0	1	0	1	2	21.4	51.387	139430000	3379100	52767000	0	36084000	0	46348000	0	294410	557220	5577200	135160	2110700	0	0.000533989	0.00425778	0	2	0.00239588	0.00189386	1443400	0	1853900	0.00275787	0	0.00432745	2	0.00354266	0.00178874	0
P161_RS0102640	P161_RS0102640	514	HAMP domain-containing histidine kinase	HK|Classic		6	6	6	2	4	0	2	0	0	0	0	2	16.6	48.594	11278000	620510	8185600	0	812480	0	0	0	0	1659000	537030	29548	389790	0	0.000116738	0.000786299	0	2	0.000451518	0.000346443	38690	0	0	7.3924e-05	0	0	1	0	0	0
P161_RS0102645	P161_RS0102645	515	TonB-dependent receptor	SusC-like		3	3	3	2	2	1	1	0	1	0	0	0	4.2	90.884	10669000	1667800	3046700	1152200	2551000	0	2251500	0	0	0	231940	36257	66232	25048	0.000143244	0.000133606	5.73519e-05	3	0.0001114	3.84201e-05	55457	0	48945	0.00010596	0	0.000114249	2	0.000110105	5.20141e-05	0
P161_RS0102655	P161_RS0102655	517	Na+/H+ antiporter NhaC			3	3	3	2	3	2	2	1	1	1	2	0	4.9	52.391	20920000	2223900	3976300	6393000	2459400	2008000	1160800	992190	1706600	0	4184000	444780	795260	1278600	0.00175723	0.00160423	0.00292759	3	0.00209635	0.000591083	491890	401590	232160	0.000939842	0.000840742	0.000541917	3	0.000774167	0.000169135	198440
P161_RS0102670	P161_RS0102670	520	Lrp/AsnC family transcriptional regulator	TR|AsnC		6	6	6	3	2	2	3	4	3	3	0	4	29.6	17.83	113400000	7298400	5994900	3391800	2401100	3154300	1983600	53849000	0	35330000	12600000	810940	666100	376870	0.00320386	0.00134368	0.000862912	3	0.00180348	0.00100948	266780	350480	220400	0.00050973	0.000733742	0.000514467	3	0.000585979	0.000104502	5983200
P161_RS0102675	P161_RS0102675	521	DUF3857 domain-containing protein			54	54	54	41	48	50	26	24	25	5	4	4	67.6	77.492	5767500000	642700000	960620000	1179000000	923380000	1165000000	884020000	4876200	4622700	3179100	151780000	16913000	25279000	31027000	0.0668198	0.0509937	0.0710419	3	0.0629518	0.00862954	24300000	30659000	23264000	0.0464294	0.0641856	0.0543038	3	0.0549729	0.00726438	128320
P161_RS0102680	P161_RS0102680	522	DUF3857 domain-containing protein			34	34	34	25	28	32	11	13	8	2	3	3	54	73.487	457800000	82344000	160730000	155600000	30950000	17256000	7375100	999400	1533900	1009800	13873000	2495300	4870600	4715100	0.00985841	0.00982515	0.0107961	3	0.0101599	0.000450062	937890	522920	223490	0.001792	0.00109475	0.000521679	3	0.00113614	0.000519433	30285
P161_RS0102690	P161_RS0102690	523	YceI family protein			11	11	11	9	9	10	10	9	9	7	9	8	46.2	22.979	12237000000	289020000	717720000	1096000000	2026400000	1530800000	561810000	2518000000	1903400000	1593900000	1223700000	28902000	71772000	109600000	0.114186	0.144781	0.250949	3	0.169972	0.0586059	202640000	153080000	56181000	0.387179	0.320478	0.13114	3	0.279599	0.108451	251800000
P161_RS0102695	P161_RS0102695	524	tRNA threonylcarbamoyladenosine dehydratase			8	8	8	3	6	2	3	0	0	4	5	3	35.9	26.163	37647000	2759200	10283000	972100	6490100	0	0	6432300	7269000	3441800	3137300	229940	856880	81008	0.000908445	0.00172853	0.000185482	3	0.000940819	0.000630362	540840	0	0	0.00103337	0	0	1	0	0	536020
P161_RS0102700	P161_RS0102700	525	hypothetical protein			3	3	3	0	2	0	1	0	2	0	0	0	14.5	24.794	1415000	0	1357900	0	57045	0	0	0	0	0	108840	0	104450	0	0	0.0002107	0	1	0	0	4388.1	0	0	8.38423e-06	0	0	1	0	0	0
P161_RS0102705	P161_RS0102705	526	D-tyrosyl-tRNA(Tyr) deacylase			2	2	2	1	1	1	2	2	0	2	0	1	16.7	16.678	530520000	0	284610000	0	6666600	198690000	0	40281000	0	269510	66314000	0	35576000	0	0	0.0717652	0	1	0	0	833320	24836000	0	0.0015922	0.051995	0	2	0.0267936	0.0241441	5035100
P161_RS0102710	P161_RS0102710	527	SMI1/KNR4 family protein			4	4	4	4	3	0	1	0	0	0	0	0	21.7	28.713	10652000	7150700	3501300	0	0	0	0	0	0	0	819390	550060	269330	0	0.00217317	0.000543302	0	2	0.00135824	0.00092342	0	0	0	0	0	0	0	0	0	0
P161_RS0102715	P161_RS0102715	528	ribosome small subunit-dependent GTPase A			6	6	6	1	1	0	4	1	1	3	1	0	20.5	36.284	53926000	1982800	4990900	0	15868000	30658000	0	313730	111870	0	2451200	90129	226860	0	0.000356081	0.00045763	0	2	0.000406856	0.000196223	721290	1393600	0	0.00137815	0.00291755	0	2	0.00214785	0.00119169	14260
P161_RS0102720	P161_RS0102720	529	insulinase family protein			56	56	56	48	48	46	27	24	25	15	28	15	60.1	105.78	17240000000	1524700000	2426600000	1992200000	3171500000	3309100000	2765600000	386580000	1254600000	409090000	383110000	33883000	53924000	44272000	0.133865	0.108777	0.101369	3	0.11467	0.0139054	70478000	73535000	61457000	0.134661	0.153948	0.143455	3	0.144021	0.00788421	8590800
P161_RS0102725	P161_RS0102725	530	bifunctional 3-deoxy-7-phosphoheptulonate synthase/chorismate mutase type II			32	32	32	30	29	28	23	20	19	19	21	18	80	40.478	23065000000	3283900000	6325100000	3118800000	2103300000	1205100000	1722500000	2101600000	2137300000	1067200000	1098300000	156370000	301200000	148520000	0.617785	0.607592	0.340063	3	0.521813	0.128584	100160000	57388000	82025000	0.191373	0.120144	0.191466	3	0.167661	0.0335998	100080000
P161_RS0102730	P161_RS0102730	531	prephenate dehydrogenase			15	15	15	12	15	1	4	3	1	2	3	1	61.5	31.619	872250000	241810000	525800000	617400	3410700	1709500	49407000	3698900	1790000	44008000	51309000	14224000	30929000	36318	0.0561961	0.0623911	8.31566e-05	3	0.0395568	0.0280264	200630	100560	2906300	0.000383339	0.000210526	0.006784	3	0.00245929	0.00305885	217580
P161_RS0102735	P161_RS0102735	532	aminotransferase class I/II-fold pyridoxal phosphate-dependent enzyme			25	25	25	19	22	11	10	6	5	5	8	5	70.3	42.754	1055800000	216740000	335130000	238120000	99102000	27050000	29786000	71191000	34229000	4449100	52789000	10837000	16756000	11906000	0.0428147	0.0338008	0.0272609	3	0.0346255	0.00637653	4955100	1352500	1489300	0.00946759	0.0028315	0.00347638	3	0.00525849	0.0029879	3559600
P161_RS0102740	P161_RS0102740	533	hypothetical protein			11	11	11	8	11	1	3	2	1	4	3	0	42.7	30.681	398550000	28132000	214010000	188310	48434000	2925200	0	37153000	67708000	0	33213000	2344300	17834000	15693	0.00926184	0.0359754	3.5932e-05	3	0.0150911	0.0152402	4036100	243770	0	0.00771168	0.000510341	0	2	0.00411101	0.0035212	3096100
P161_RS0102745	P161_RS0102745	534	UDP-glucose--hexose-1-phosphate uridylyltransferase			16	16	16	8	13	13	9	9	8	5	6	3	50	39.128	332330000	10198000	56962000	70669000	27639000	102130000	9061400	27062000	27893000	720350	15825000	485610	2712500	3365200	0.00191854	0.00547175	0.00770523	3	0.00503184	0.0023828	1316100	4863200	431490	0.00251464	0.0101813	0.0010072	3	0.0045677	0.00401681	1288600
P161_RS0102750	P161_RS0102750	535	galactokinase			15	15	15	12	12	11	3	2	2	3	3	2	37.2	42.273	111370000	23609000	26007000	16638000	21615000	1192900	1217300	19312000	1570700	205880	4640300	983700	1083600	693230	0.00388639	0.00218588	0.00158728	3	0.00255318	0.000973883	900630	49704	50720	0.00172081	0.000104057	0.000118393	3	0.000647754	0.000758789	804650
P161_RS17925	P161_RS17925	536	aldose 1-epimerase			14	14	14	10	11	9	5	6	5	5	6	6	42.2	34.436	387830000	14800000	39396000	26411000	36721000	47327000	50530000	45411000	122910000	4317100	21546000	822210	2188700	1467300	0.00324838	0.00441513	0.00335965	3	0.00367438	0.000525749	2040100	2629300	2807200	0.00389797	0.00550453	0.00655268	3	0.00531839	0.00109174	2522900
P161_RS0102760	P161_RS0102760	537	GntR family transcriptional regulator	TR|GntR		2	2	2	1	2	0	0	0	0	0	0	0	6	38.062	1674900	0	1674900	0	0	0	0	0	0	0	93051	0	93051	0	0	0.000187706	0	1	0	0	0	0	0	0	0	0	0	0	0	0
P161_RS0102765	P161_RS0102765	538	formylglycine-generating enzyme family protein			14	14	14	10	11	13	8	9	10	6	7	5	40.4	41.284	273750000	14668000	60643000	90304000	14898000	19266000	16376000	6834000	14698000	36065000	13036000	698460	2887800	4300200	0.00275947	0.00582538	0.00984608	3	0.00614364	0.00290184	709440	917450	779790	0.00135551	0.00192071	0.00182022	3	0.00169881	0.000246195	325430
P161_RS0102770	P161_RS0102770	539	TonB-dependent receptor	SusC-like		32	32	32	27	23	23	12	8	8	15	8	10	42.2	94.232	327010000	77032000	83741000	76945000	10317000	8364800	4406000	36887000	23078000	6236500	8175200	1925800	2093500	1923600	0.00760844	0.00422308	0.00440443	3	0.00541198	0.00155489	257930	209120	110150	0.00049282	0.0004378	0.000257117	3	0.000395912	0.000100681	922160
P161_RS0102790	P161_RS0102790	543	hypothetical protein			9	9	9	6	5	7	0	2	0	1	2	2	26.4	41.629	47589000	6331400	19056000	19067000	0	858190	0	1024300	935140	317360	2643800	351740	1058600	1059300	0.00138965	0.00213545	0.00242546	3	0.00198352	0.000436299	0	47677	0	0	9.98134e-05	0	1	0	0	56907
P161_RS0102795	P161_RS0102795	544	DNA-protecting protein DprA			5	5	5	3	2	1	1	1	0	0	0	0	13.6	41.566	8563400	454640	1195100	1608100	4688000	617510	0	0	0	0	389250	20666	54325	73096	8.16471e-05	0.000109586	0.000167366	3	0.000119533	3.56946e-05	213090	28068	0	0.000407146	5.87613e-05	0	2	0.000232954	0.000179689	0
P161_RS0102800	P161_RS0102800	545	SPOR domain-containing protein			4	4	4	3	4	0	3	1	0	0	0	0	14.8	33.671	7890200	3154000	4036500	0	699630	0	0	0	0	0	493130	197120	252280	0	0.00077878	0.000508908	0	2	0.000643844	0.000322889	43727	0	0	8.35481e-05	0	0	1	0	0	0
P161_RS0102805	P161_RS0102805	546	acyl-CoA thioesterase			5	5	5	4	4	3	3	3	3	2	0	3	44.1	18.706	47241000	13672000	14715000	7041400	1518400	1922800	1839300	1776500	0	4755700	5249000	1519200	1635000	782380	0.00600204	0.00329818	0.0017914	3	0.00369721	0.00174199	168710	213650	204370	0.00032235	0.000447283	0.000477049	3	0.000415561	6.70207e-05	197390
P161_RS0102815	P161_RS0102815	548	mechanosensitive ion channel			3	3	3	1	2	1	1	2	1	1	1	1	11.2	36.164	30768000	1421300	5605200	8148900	2219300	1441400	2291600	4654500	3999800	985770	2564000	118440	467100	679080	0.000467932	0.000942251	0.00155488	3	0.000988353	0.000444939	184940	120120	190970	0.00035336	0.000251475	0.00044577	3	0.000350202	7.93519e-05	387870
P161_RS0102820	P161_RS0102820	549	ATP-binding protein			41	41	41	32	33	25	9	9	9	11	12	10	46.6	115.74	615420000	102520000	188670000	71103000	12797000	38720000	55446000	88191000	29382000	28585000	12067000	2010300	3699500	1394200	0.00794228	0.00746277	0.00319227	3	0.00619911	0.00213515	250920	759210	1087200	0.000479427	0.00158943	0.00253779	3	0.00153555	0.000841185	1729200
P161_RS0102825	P161_RS0102825	550	type 1 glutamine amidotransferase			6	6	6	2	4	1	2	2	1	4	5	3	46.8	20.434	367760000	2333600	9371400	2240100	4235500	1493400	344970	142450000	77358000	127930000	36776000	233360	937140	224010	0.000921957	0.00189043	0.000512911	3	0.00110843	0.000577622	423550	149340	34497	0.000809267	0.000312648	8.05243e-05	3	0.000400813	0.000303969	14245000
P161_RS0102830	P161_RS0102830	551	peptidoglycan DD-metalloendopeptidase family protein			9	9	9	2	6	4	1	2	1	1	1	1	26.1	45.489	32109000	1581900	21401000	4431500	965390	855380	738230	465170	1122500	547830	1689900	83256	1126400	233230	0.000328927	0.00227222	0.000534022	3	0.00104505	0.000871764	50810	45020	38854	9.70814e-05	9.42509e-05	9.06946e-05	3	9.4009e-05	2.61302e-06	24482
P161_RS0102835	P161_RS0102835	552	DUF4292 domain-containing protein			13	13	13	10	12	0	4	4	5	3	2	4	39.1	29.516	239630000	28289000	193260000	0	3797800	2392500	1544600	4144800	4584000	1624200	14096000	1664000	11368000	0	0.00657412	0.0229319	0	2	0.014753	0.00964176	223400	140740	90857	0.000426845	0.000294644	0.000212082	3	0.00031119	8.84538e-05	243810
P161_RS0102840	P161_RS0102840	553	hypothetical protein			4	4	4	4	4	0	0	0	1	0	0	0	14.4	38.183	10811000	3939100	6872300	0	0	0	0	0	0	0	831650	303010	528640	0	0.00119713	0.00106639	0	2	0.00113176	0.00053618	0	0	0	0	0	0	0	0	0	0
P161_RS0102845	P161_RS0102845	554	nucleotidyltransferase			23	23	23	16	17	20	14	15	16	11	13	13	84	36.708	8100100000	533440000	939040000	929030000	1062100000	1110500000	1427800000	560690000	1055800000	481830000	426320000	28076000	49423000	48896000	0.110922	0.0996979	0.111956	3	0.107526	0.00555105	55898000	58445000	75148000	0.106803	0.122357	0.175413	3	0.134858	0.0293719	29510000
P161_RS0102850	P161_RS0102850	555	ABC-F family ATP-binding cassette domain-containing protein			25	25	25	18	21	20	6	7	6	3	4	6	38.2	71.637	385510000	39705000	78816000	80709000	56695000	87971000	35013000	1994500	1453700	3148400	12047000	1240800	2463000	2522200	0.00490214	0.00496845	0.00577503	3	0.00521521	0.000396779	1771700	2749100	1094100	0.00338514	0.00575533	0.00255389	3	0.00389812	0.00135638	62329
P161_RS17935	P161_RS17935	556	hypothetical protein			7	7	7	4	4	2	2	2	0	0	0	0	53.7	14.252	33689000	6698700	4400400	1269400	14290000	7030900	0	0	0	0	4211100	837330	550050	158680	0.00330812	0.00110958	0.000363327	3	0.00159367	0.00124999	1786200	878860	0	0.00341285	0.00183992	0	2	0.00262639	0.00139471	0
P161_RS0102860	P161_RS0102860	557	3'-5' exonuclease			6	6	6	5	5	0	0	0	0	0	0	0	28.6	27.966	7633400	3000200	4633200	0	0	0	0	0	0	0	545250	214300	330940	0	0.000846655	0.000667584	0	2	0.00075712	0.00036432	0	0	0	0	0	0	0	0	0	0
P161_RS18930	P161_RS18930	558	T9SS type A sorting domain-containing protein			7	7	7	6	7	6	5	5	5	5	5	5	23.1	65.957	2222200000	155460000	232440000	165820000	284900000	282060000	350260000	87859000	421560000	241840000	246910000	17273000	25827000	18425000	0.068242	0.0520992	0.0421874	3	0.0541762	0.0107377	31655000	31340000	38918000	0.0604824	0.0656113	0.090844	3	0.0723126	0.0132699	9762100
P161_RS0102870	P161_RS0102870	559	response regulator transcription factor	RR|OmpR		9	9	9	6	9	1	4	3	2	4	4	2	53	26.383	859060000	149600000	300430000	83053	159340000	62956000	9970900	97997000	77579000	1099000	71588000	12466000	25036000	6921	0.0492506	0.0505035	1.58469e-05	3	0.0332567	0.0235104	13278000	5246300	830910	0.0253699	0.0109833	0.00193954	3	0.0127643	0.00964796	8166400
P161_RS0102875	P161_RS0102875	560	two-component sensor histidine kinase	HK|Classic		12	12	12	9	11	9	2	4	3	2	3	3	45.4	40.09	93083000	11291000	52378000	18233000	1734100	991300	5591100	647910	824550	1391500	6205500	752750	3491800	1215600	0.00297396	0.00704379	0.00278334	3	0.00426703	0.00196501	115600	66086	372740	0.000220874	0.000138353	0.000870065	3	0.000409764	0.000327221	43194
P161_RS0102880	P161_RS0102880	561	phosphoribosylamine--glycine ligase			32	32	32	20	19	8	11	6	9	8	14	10	80.9	46.29	1884300000	188990000	258530000	127740000	355350000	56874000	190670000	218930000	316980000	170250000	69790000	6999700	9575300	4731300	0.0276544	0.0193156	0.0108332	3	0.0192677	0.00686731	13161000	2106400	7062000	0.0251464	0.00440982	0.0164844	3	0.0153469	0.0085038	8108400
P161_RS0102885	P161_RS0102885	562	glycosyltransferase family 2 protein	CAZyme, single-domain, contains GT2 domain *		5	5	5	4	5	0	1	0	0	2	1	0	22.4	28.901	25585000	4318400	16912000	0	1192100	0	0	2007300	1155100	0	2132100	359860	1409400	0	0.00142173	0.00284309	0	2	0.00213241	0.00116069	99339	0	0	0.000189805	0	0	1	0	0	167280
P161_RS0102890	P161_RS0102890	563	exopolysaccharide biosynthesis polyprenyl glycosylphosphotransferase			4	4	4	3	3	2	1	1	1	1	1	0	9.3	53.239	18953000	4846400	10067000	2588900	1093600	0	0	357900	0	0	789730	201930	419440	107870	0.000797784	0.00084611	0.000246988	3	0.000630294	0.000271755	45568	0	0	8.70657e-05	0	0	1	0	0	14913
P161_RS0102895	P161_RS0102895	564	glycosyltransferase	CAZyme, single-domain, contains GT2 domain		6	6	6	6	4	0	2	0	0	1	2	1	22.6	29.784	7139500	2919400	3034300	0	526880	0	0	159080	499870	0	509960	208530	216730	0	0.000823859	0.000437196	0	2	0.000630527	0.00033655	37634	0	0	7.19064e-05	0	0	1	0	0	11363
P161_RS0102900	P161_RS0102900	565	hypothetical protein			3	3	3	3	3	0	1	0	0	0	0	0	6.9	66.124	5969900	1679600	3517200	0	773220	0	0	0	0	0	238800	67182	140690	0	0.000265422	0.000283805	0	2	0.000274614	0.000129671	30929	0	0	5.90953e-05	0	0	1	0	0	0
P161_RS0102905	P161_RS0102905	566	glycosyltransferase	CAZyme, single-domain, contains GT94 domain		9	9	9	5	6	8	1	1	1	1	1	1	30.5	40.94	37902000	3105800	8271000	9198200	428820	0	553050	434590	164310	15747000	1804900	147890	393860	438010	0.000584283	0.000794509	0.0010029	3	0.000793898	0.000170902	20420	0	26336	3.9016e-05	0	6.14746e-05	2	5.02453e-05	2.53985e-05	20695
P161_RS0102910	P161_RS0102910	567	acyltransferase			3	3	3	0	0	1	1	1	0	0	0	1	18.1	22.736	5128800	0	0	0	4923000	0	0	0	0	205800	512880	0	0	0	0	0	0	0	0	0	492300	0	0	0.000940625	0	0	1	0	0	0
P161_RS17945	P161_RS17945	568	glycosyltransferase	CAZyme, single-domain, contains GT2 domain		8	8	8	6	5	1	5	4	3	3	3	3	24.9	30.275	29546000	5827000	14878000	110430	3204800	885810	1039300	1508700	1157200	934760	2462100	485580	1239800	9202.5	0.00191843	0.00250097	2.10708e-05	3	0.00148016	0.00105878	267070	73817	86610	0.000510284	0.000154538	0.000202169	3	0.000288997	0.000157677	125720
P161_RS0102920	P161_RS0102920	569	EpsG family protein			2	2	2	1	1	0	0	0	0	0	1	0	9.2	42.739	66989000	177190	1629900	0	0	0	0	0	65182000	0	3940600	10423	95877	0	4.11791e-05	0.000193407	0	2	0.000117293	8.31832e-05	0	0	0	0	0	0	0	0	0	0
P161_RS0102930	P161_RS0102930	571	dTDP-4-dehydrorhamnose 3,5-epimerase			5	5	5	4	3	2	1	1	1	1	1	1	31.7	21.542	181240000	4766700	6281000	40319000	27870000	25860000	0	18995000	30806000	26340000	18124000	476670	628100	4031900	0.00188322	0.00126703	0.00923176	3	0.00412734	0.00361813	2787000	2586000	0	0.00532505	0.00541388	0	2	0.00536946	0.00253145	1899500
P161_RS0102935	P161_RS0102935	572	glucose-1-phosphate thymidylyltransferase RfbA			9	9	9	5	9	0	4	3	2	2	2	1	37.9	31.64	452680000	42143000	105020000	0	120120000	82513000	38174000	36059000	28427000	228860	32335000	3010200	7501600	0	0.0118927	0.0151325	0	2	0.0135126	0.00650576	8579700	5893800	2726700	0.016393	0.0123389	0.00636477	3	0.0116989	0.00411895	2575600
P161_RS0102940	P161_RS0102940	573	dTDP-glucose 4,6-dehydratase			15	15	15	12	13	1	4	5	2	2	2	2	54.9	38.204	107800000	13675000	77644000	836980	9164100	3297000	1464400	1189700	352370	178730	4900100	621610	3529300	38045	0.00245585	0.00711943	8.71109e-05	3	0.0032208	0.00292144	416550	149870	66564	0.000795892	0.000313758	0.000155376	3	0.000421675	0.000272396	54079
P161_RS0102945	P161_RS0102945	574	hypothetical protein			20	20	20	17	18	14	5	7	6	6	8	6	47.3	39.865	777910000	280420000	281220000	167230000	4378200	3443900	7478800	8631700	17885000	7219200	35360000	12746000	12783000	7601500	0.0503568	0.0257863	0.017405	3	0.0311827	0.0139832	199010	156540	339950	0.000380244	0.000327722	0.000793525	3	0.000500497	0.000208309	392350
P161_RS0102950	P161_RS0102950	575	hypothetical protein			34	34	34	23	23	25	15	13	14	10	9	12	59.6	63.946	1869400000	125810000	240310000	385520000	357190000	209640000	162410000	231540000	69177000	87787000	58418000	3931600	7509600	12047000	0.0155329	0.0151486	0.0275838	3	0.0194218	0.00577353	11162000	6551400	5075200	0.021327	0.0137156	0.0118467	3	0.0156298	0.00410014	7235800
P161_RS0102955	P161_RS0102955	576	S41 family peptidase			17	17	17	10	11	13	9	7	6	0	0	0	33.6	61.834	127630000	9463600	28644000	34062000	23392000	29764000	2301000	0	0	0	5317700	394320	1193500	1419200	0.00155788	0.00240757	0.00324951	3	0.00240499	0.000690611	974650	1240200	95876	0.00186224	0.0025964	0.000223798	3	0.00156081	0.000991784	0
P161_RS0102965	P161_RS0102965	578	acyl-CoA dehydrogenase			29	29	29	24	24	19	15	13	13	19	21	20	70.4	43.461	4116100000	156190000	490880000	688700000	305140000	76768000	199270000	652230000	817710000	729200000	228670000	8677100	27271000	38261000	0.0342814	0.0550121	0.0876055	3	0.0589663	0.0219483	16952000	4264900	11070000	0.0323898	0.00892871	0.02584	3	0.0223862	0.00988441	36235000
P161_RS0102970	P161_RS0102970	579	SGNH/GDSL hydrolase family protein	*		4	4	4	3	4	1	1	0	0	0	0	0	22.6	26.917	15887000	1928800	13554000	224350	180130	0	0	0	0	0	1444300	175340	1232200	20396	0.000692732	0.00248564	4.67003e-05	3	0.00107502	0.00103173	16376	0	0	3.12892e-05	0	0	1	0	0	0
P161_RS0102975	P161_RS0102975	580	hypothetical protein			3	3	3	2	2	2	2	3	2	1	0	2	13	17.841	18557000	1665800	3269200	3364000	2043900	2051700	1061000	1788800	0	3312200	4639100	416440	817290	841010	0.00164527	0.00164867	0.00192564	3	0.00173986	0.000131377	510980	512920	265250	0.000976317	0.00107382	0.000619157	3	0.000889763	0.000195443	447200
P161_RS0103010	P161_RS0103010	586	MBL fold metallo-hydrolase			11	11	11	9	9	8	4	5	4	5	5	4	28.6	49.817	125700000	9497300	25981000	34520000	15695000	11813000	4554400	8820300	11676000	3141400	5465100	412930	1129600	1500900	0.0016314	0.00227867	0.00343658	3	0.00244888	0.000746726	682380	513620	198020	0.00130381	0.00107528	0.000462226	3	0.000947104	0.000355327	383490
P161_RS0103015	P161_RS0103015	587	methyltransferase domain-containing protein			2	2	2	1	1	0	0	0	0	1	0	0	10.4	22.449	572550	388470	0	0	0	0	0	184080	0	0	52050	35316	0	0	0.000139526	0	0	1	0	0	0	0	0	0	0	0	0	0	0	16734
P161_RS0103030	P161_RS0103030	590	rhodanese-like domain-containing protein			2	2	2	1	1	0	0	0	0	0	1	0	20	12.437	501020	0	286190	0	0	0	0	0	214830	0	83503	0	47698	0	0	9.62181e-05	0	1	0	0	0	0	0	0	0	0	0	0	0	0
P161_RS0103035	P161_RS0103035	591	Crp/Fnr family transcriptional regulator	OCS|Crp		4	4	4	1	4	0	1	0	0	1	0	0	23.3	24.349	3737500	465100	2532000	0	268910	0	0	471450	0	0	339770	42282	230180	0	0.000167047	0.000464327	0	2	0.000315687	0.00019203	24447	0	0	4.67103e-05	0	0	1	0	0	42859
P161_RS0103045	P161_RS0103045	592	TolC family protein			20	20	20	14	14	16	9	13	12	16	14	13	52.7	50.561	362870000	23187000	77237000	71183000	76481000	43455000	20063000	24972000	19030000	7263200	12960000	828100	2758500	2542300	0.00327165	0.00556455	0.00582105	3	0.00488575	0.00114613	2731500	1552000	716540	0.00521901	0.00324916	0.00167258	3	0.00338025	0.00145079	891860
P161_RS0103050	P161_RS0103050	593	efflux RND transporter permease subunit			36	36	36	29	30	23	7	11	10	10	11	8	34	117.67	440110000	31452000	120700000	58524000	35361000	100420000	20602000	28695000	42669000	1692600	9567700	683740	2624000	1272300	0.00270132	0.00529323	0.00291316	3	0.0036359	0.00117509	768710	2183000	447870	0.00146876	0.00457018	0.00104544	3	0.00236146	0.00157134	623810
P161_RS0103055	P161_RS0103055	594	Bro-N domain-containing protein			9	9	9	9	8	0	5	5	1	4	4	3	33.2	32.241	72247000	20259000	39763000	0	4998500	1678600	1434300	2120600	1690600	302280	6020600	1688200	3313600	0	0.00666973	0.00668431	0	2	0.00667702	0.00314758	416540	139880	119520	0.000795873	0.000292843	0.000278988	3	0.000455902	0.000240462	176720
P161_RS0103060	P161_RS0103060	595	HlyD family efflux transporter periplasmic adaptor subunit			18	18	18	14	14	18	10	11	9	7	7	1	57.7	41.299	1596600000	98410000	248650000	329410000	182720000	414930000	123600000	88801000	93576000	16484000	84030000	5179500	13087000	17337000	0.0204631	0.0263996	0.0396962	3	0.028853	0.00804123	9616700	21838000	6505100	0.0183744	0.0457186	0.0151845	3	0.0264258	0.0137041	4673700
P161_RS0103065	P161_RS0103065	596	hypothetical protein			4	4	4	2	3	0	2	0	2	0	2	2	11.3	46.194	12990000	2841000	3496600	0	2289100	0	671430	0	3032800	658950	618570	135290	166500	0	0.000534503	0.00033587	0	2	0.000435186	0.000220594	109010	0	31973	0.000208283	0	7.46327e-05	2	0.000141458	8.61614e-05	0
P161_RS0103070	P161_RS0103070	597	acyl-CoA thioesterase II			14	14	14	6	12	1	6	5	3	5	5	4	55.6	32.768	449050000	51206000	50607000	388570	109600000	51425000	22641000	69195000	68203000	25791000	28066000	3200400	3162900	24286	0.0126441	0.00638032	5.56072e-05	3	0.00636001	0.00513926	6849800	3214100	1415100	0.0130877	0.00672883	0.00330318	3	0.00770658	0.00405392	4324700
P161_RS0103090	P161_RS0103090	601	TonB-dependent receptor	SusC-like		41	41	41	31	32	30	19	15	15	21	21	21	57	93.306	1997800000	148110000	270370000	208080000	224420000	194240000	115280000	269130000	368780000	199440000	44397000	3291300	6008300	4624100	0.0130032	0.0121202	0.0105877	3	0.0119037	0.000997944	4987100	4316400	2561700	0.00952873	0.00903653	0.00597962	3	0.00818163	0.00156996	5980600
P161_RS0103095	P161_RS0103095	602	DNA repair protein RecO			7	7	7	4	5	0	0	0	0	0	0	1	40.4	27.544	13734000	1315500	5424900	0	0	0	0	0	0	6993100	807850	77384	319110	0	0.000305728	0.00064372	0	2	0.000474724	0.000262908	0	0	0	0	0	0	0	0	0	0
P161_RS0103100	P161_RS0103100	603	hypothetical protein			13	13	13	8	12	11	4	4	4	3	4	4	28	86.272	201680000	18828000	27937000	40417000	21760000	29387000	28842000	5042600	6171800	23298000	7203000	672440	997730	1443500	0.00265667	0.00201266	0.00330515	3	0.00265816	0.000527661	777130	1049500	1030100	0.00148484	0.00219716	0.0024045	3	0.00202884	0.000393864	180090
P161_RS0103105	P161_RS0103105	604	methyltransferase domain-containing protein			4	4	4	4	4	1	1	1	2	0	1	0	12	38.073	8096700	2206600	4304600	358620	426590	0	800260	0	0	0	426140	116140	226560	18875	0.000458845	0.000457025	4.32177e-05	3	0.000319696	0.000195501	22452	0	42119	4.28985e-05	0	9.83159e-05	2	7.06072e-05	4.02456e-05	0
P161_RS0103120	P161_RS0103120	607	1-acyl-sn-glycerol-3-phosphate acyltransferase			2	2	2	1	2	0	1	0	0	0	0	0	7.2	31.07	2022100	0	2022100	0	0	0	0	0	0	0	144430	0	144430	0	0	0.000291349	0	1	0	0	0	0	0	0	0	0	0	0	0	0
P161_RS0103125	P161_RS0103125	608	tryptophan--tRNA ligase			19	19	19	15	15	9	8	8	6	6	6	4	57.5	36.195	709710000	104350000	242580000	44878000	88399000	54958000	51963000	50805000	43560000	28207000	44357000	6522100	15162000	2804900	0.0257675	0.0305853	0.00642232	3	0.020925	0.0104419	5524900	3434900	3247700	0.0105563	0.00719108	0.00758091	3	0.00844276	0.00150294	3175300
P161_RS0103135	P161_RS0103135	610	T9SS type A sorting domain-containing protein	*		37	30	19	21	20	20	12	13	8	7	7	6	23.6	353.4	803850000	31959000	52428000	193610000	141380000	130300000	66911000	69848000	76378000	41026000	14886000	591840	970890	3585400	0.00233824	0.00195851	0.00820942	3	0.00416872	0.00286141	2618200	2412900	1239100	0.00500253	0.00505149	0.00289236	3	0.00431546	0.00100648	1293500
P161_RS0103140	P161_RS0103140	611	ribosome biogenesis GTPase Der			19	19	19	12	14	12	7	8	8	9	9	8	46.8	49.481	1517200000	65680000	201970000	149700000	246130000	17533000	270280000	200150000	254130000	111620000	84288000	3648900	11220000	8316700	0.014416	0.0226334	0.0190426	3	0.0186973	0.00336359	13674000	974060	15016000	0.0261266	0.00203923	0.035051	3	0.0210723	0.0139428	11120000
P161_RS18935	P161_RS18935	614	hypothetical protein			8	8	8	4	4	0	5	5	5	7	6	5	38	32.562	357680000	3064600	5326700	0	78105000	2045400	34763000	83628000	96364000	54388000	27514000	235740	409750	0	0.00093136	0.000826563	0	2	0.000878961	0.000416549	6008000	157340	2674100	0.0114793	0.000329397	0.00624199	3	0.00601691	0.00455473	6432900
P161_RS0103160	P161_RS0103160	615	response regulator transcription factor	RR|NarL		2	2	2	2	2	1	1	1	1	1	1	1	14	21.302	52798000	13282000	21687000	6851500	2256300	2018000	1075700	2935300	2014900	677110	5866400	1475800	2409700	761280	0.00583058	0.00486093	0.00174309	3	0.00414487	0.00174384	250700	224230	119520	0.000479006	0.000469433	0.000278988	3	0.000409143	9.21158e-05	326150
P161_RS0103165	P161_RS0103165	616	tandem-95 repeat protein			5	5	5	2	3	1	1	0	0	1	1	0	3	257.57	38129000	1157700	12272000	2091200	21752000	0	0	306930	549360	0	1314800	39922	423180	72109	0.000157724	0.000853654	0.000165107	3	0.000392161	0.000326339	750050	0	0	0.0014331	0	0	1	0	0	10584
P161_RS0103180	P161_RS0103180	619	GTPase Era			13	13	13	11	12	9	5	5	6	3	3	2	45.9	33.975	404210000	23322000	79252000	48578000	32699000	27317000	27393000	101330000	23220000	41098000	28872000	1665800	5660800	3469900	0.00658123	0.0114192	0.00794496	3	0.00864845	0.00203676	2335700	1951200	1956600	0.00446276	0.0040849	0.00456717	3	0.00437161	0.000207168	7237700
P161_RS0103195	P161_RS0103195	623	DUF58 domain-containing protein			5	5	5	4	5	0	0	1	0	0	0	0	17	35.956	9328800	1732900	7595800	0	0	0	0	0	0	0	490990	91207	399780	0	0.00036034	0.000806451	0	2	0.000583395	0.000329852	0	0	0	0	0	0	0	0	0	0
P161_RS0103200	P161_RS0103200	624	peptidase M1			22	22	22	11	13	7	2	3	6	8	4	7	34.2	98.985	129410000	9476200	18960000	11042000	1667800	5868400	18090000	11998000	16024000	36281000	2156800	157940	316010	184030	0.000623988	0.000637467	0.00042137	3	0.000560942	9.88454e-05	27797	97807	301510	5.3111e-05	0.000204762	0.000703797	3	0.000320557	0.000277974	199970
P161_RS0103205	P161_RS0103205	625	thioredoxin			7	7	7	7	7	3	6	6	5	5	0	6	77.1	11.54	1159300000	32160000	47988000	109670000	230750000	118540000	73746000	219590000	0	326890000	165620000	4594300	6855500	15667000	0.0181511	0.0138292	0.0358724	3	0.0226176	0.00953723	32964000	16935000	10535000	0.0629835	0.035454	0.0245912	3	0.0410096	0.0161584	31369000
P161_RS0103210	P161_RS0103210	626	methylenetetrahydrofolate reductase [NAD(P)H]			14	14	14	9	12	3	5	7	6	4	5	5	52.1	35.899	1260900000	47399000	392680000	12942000	86784000	139700000	247990000	85104000	122740000	125580000	66365000	2494700	20667000	681160	0.00985604	0.0416902	0.00155964	3	0.017702	0.0172971	4567600	7352500	13052000	0.0087272	0.0153927	0.0304665	3	0.0181955	0.00909362	4479200
P161_RS18945	P161_RS18945	627	dihydropteroate synthase			62	62	62	49	52	46	25	24	23	22	28	28	65.4	115.88	5178900000	451950000	832530000	651610000	718920000	546210000	488710000	536620000	580640000	371740000	92481000	8070500	14867000	11636000	0.0318849	0.0299903	0.0266427	3	0.0295059	0.00216733	12838000	9753700	8726900	0.0245293	0.0204197	0.0203707	3	0.0217732	0.00194892	9582500
P161_RS0103220	P161_RS0103220	628	5-methyltetrahydrofolate--homocysteine methyltransferase			16	16	16	15	14	9	7	5	7	7	7	7	54	37.33	1878900000	203430000	356060000	365020000	207980000	44294000	250360000	141820000	203160000	106730000	144530000	15648000	27389000	28078000	0.061822	0.0552501	0.0642896	3	0.0604539	0.00381507	15999000	3407300	19259000	0.0305689	0.0071333	0.0449551	3	0.0275524	0.0155873	10909000
P161_RS0103225	P161_RS0103225	629	cysteine synthase CysM	CAZyme, single-domain, contains CBM5 domain		29	29	29	23	27	8	16	14	11	15	14	12	75.8	32.6	5070600000	554080000	748960000	14608000	903380000	331960000	583700000	844880000	640970000	448030000	316910000	34630000	46810000	913020	0.136816	0.0944268	0.00209052	3	0.0777778	0.0562472	56461000	20748000	36481000	0.107879	0.0434366	0.0851554	3	0.0788236	0.0266866	52805000
P161_RS0103230	P161_RS0103230	630	serine acetyltransferase			13	13	13	8	11	0	5	3	1	4	3	4	57.6	28.527	656260000	20077000	122430000	0	116840000	100660000	1525200	145570000	67577000	81577000	59660000	1825200	11130000	0	0.00721099	0.0224518	0	2	0.0148314	0.00935929	10622000	9151200	138650	0.0202952	0.0191583	0.000323642	3	0.0132591	0.00915849	13234000
P161_RS0103240	P161_RS0103240	632	NAD(P)/FAD-dependent oxidoreductase			31	31	22	23	31	25	17	14	18	8	11	14	81.2	38.336	8547700000	958090000	2000800000	2252300000	965110000	451820000	914310000	70808000	710770000	223600000	474870000	53227000	111160000	125130000	0.210289	0.224236	0.286508	3	0.240344	0.0331354	53617000	25101000	50795000	0.102445	0.0525498	0.118568	3	0.0911874	0.0281026	3933800
P161_RS0103245	P161_RS0103245	633	bifunctional precorrin-2 dehydrogenase/sirohydrochlorin ferrochelatase			9	9	9	4	8	3	2	2	2	2	1	1	43.6	21.995	65857000	16240000	39456000	4054600	863460	1199500	738680	2304800	624750	375110	7317400	1804400	4384000	450510	0.00712881	0.00884356	0.00103152	3	0.00566797	0.00335237	95940	133280	82075	0.00018331	0.000279026	0.000191583	3	0.000217973	4.3303e-05	256090
P161_RS0103250	P161_RS0103250	634	uroporphyrinogen-III C-methyltransferase			6	6	6	5	6	0	0	0	0	0	0	0	25.5	30.098	14636000	5799200	8837200	0	0	0	0	0	0	0	1045500	414230	631230	0	0.00163654	0.00127334	0	2	0.00145494	0.000701709	0	0	0	0	0	0	0	0	0	0
P161_RS0103255	P161_RS0103255	635	HEPN domain-containing protein			54	54	54	47	43	45	23	23	19	14	14	13	73.8	79.415	8059900000	1360600000	2181900000	2702900000	492470000	659730000	564010000	34901000	48759000	14632000	212100000	35806000	57419000	71129000	0.141462	0.115828	0.162863	3	0.140051	0.0192279	12960000	17361000	14842000	0.0247624	0.0363458	0.0346448	3	0.0319177	0.005107	918450
P161_RS0103260	P161_RS0103260	636	GTP-binding protein			43	43	43	34	34	32	17	17	16	4	6	6	86.4	49.057	5121800000	332160000	1589500000	2283000000	320190000	220710000	339100000	3491000	27585000	6143400	189700000	12302000	58869000	84554000	0.0486027	0.118753	0.193602	3	0.120319	0.059206	11859000	8174500	12559000	0.0226587	0.0171136	0.0293157	3	0.0230293	0.00498839	129290
P161_RS0103270	P161_RS0103270	637	sulfate adenylyltransferase subunit 2			23	23	23	19	19	6	6	6	3	1	1	2	75.4	34.747	2367100000	586250000	1413300000	141750000	108170000	68639000	43931000	318690	274770	4478800	139240000	34485000	83134000	8338300	0.136243	0.167701	0.019092	3	0.107679	0.0639432	6363100	4037600	2584200	0.0121578	0.00845285	0.00603214	3	0.00888094	0.00251905	18746
P161_RS0103275	P161_RS0103275	638	phosphoadenosine phosphosulfate reductase family protein			17	17	17	16	16	6	8	9	7	4	4	4	83.8	23.533	1404300000	192930000	586360000	72595000	88456000	158250000	85914000	61333000	97300000	61200000	108030000	14841000	45105000	5584200	0.0586337	0.0909874	0.012786	3	0.0541357	0.0320836	6804300	12173000	6608700	0.0130008	0.0254846	0.0154263	3	0.0179706	0.0054047	4717900
P161_RS0103295	P161_RS0103295	641	Rrf2 family transcriptional regulator	TR|Rrf2		3	3	3	2	2	1	0	0	1	2	0	0	19.9	15.145	6042200	1908700	3351700	0	0	0	251940	529770	0	0	549290	173520	304700	0	0.000685542	0.000614652	0	2	0.000650097	0.000307822	0	0	22903	0	0	5.34611e-05	1	0	0	48161
P161_RS17970	P161_RS17970	642	hypothetical protein	CAZyme, single-domain, contains PL7_5 domain *		11	11	11	7	7	4	3	2	3	3	3	2	43.3	43.926	29595000	7206900	9181400	6222400	1329800	347640	840800	2319900	1587400	558420	1409300	343190	437210	296310	0.00135587	0.000881956	0.000678455	3	0.000972095	0.000283804	63322	16554	40038	0.000120988	3.46563e-05	9.34583e-05	3	8.30341e-05	3.60072e-05	110470
P161_RS0103305	P161_RS0103305	643	aminotransferase class I/II-fold pyridoxal phosphate-dependent enzyme			22	22	22	18	17	15	12	11	14	8	12	10	68.1	43.422	3087500000	408290000	595000000	336710000	432340000	227250000	366630000	199260000	351280000	170770000	147020000	19442000	28333000	16034000	0.0768113	0.0571544	0.0367127	3	0.0568928	0.0163712	20588000	10821000	17459000	0.039337	0.0226541	0.0407535	3	0.0342482	0.00821862	9488400
P161_RS0103310	P161_RS0103310	644	bifunctional aspartate kinase/homoserine dehydrogenase I			62	62	62	49	51	52	34	35	34	40	36	40	57.4	126.11	11656000000	713430000	1701300000	1422400000	1388900000	1698200000	961290000	1524900000	1150100000	1095900000	215860000	13212000	31506000	26341000	0.0521979	0.063555	0.0603125	3	0.0586885	0.00477664	25720000	31448000	17802000	0.0491426	0.0658374	0.0415541	3	0.052178	0.0101433	28240000
P161_RS0103315	P161_RS0103315	645	O-acetylhomoserine aminocarboxypropyltransferase/cysteine synthase			32	32	32	22	29	24	25	20	24	23	24	24	96.5	45.266	35808000000	2430000000	3561500000	4650400000	4765300000	1806000000	4134800000	3862900000	6732500000	3864200000	1492000000	101250000	148400000	193770000	0.400018	0.299358	0.443671	3	0.381016	0.0604285	198560000	75249000	172280000	0.379384	0.157536	0.402143	3	0.313021	0.110336	160950000
P161_RS0103320	P161_RS0103320	646	methionine adenosyltransferase			24	24	24	19	20	19	14	16	15	17	15	11	68.3	47.168	5752000000	165730000	517680000	622060000	695210000	1057700000	957530000	939230000	647190000	149710000	273900000	7891700	24652000	29622000	0.0311785	0.0497289	0.0678249	3	0.0495774	0.0149612	33105000	50365000	45596000	0.0632529	0.105441	0.106432	3	0.0917086	0.0201253	44725000
P161_RS0103325	P161_RS0103325	647	zinc-dependent metalloprotease			59	59	58	53	51	48	34	34	32	38	40	38	63.4	94.187	17766000000	1084200000	2122000000	1806600000	1584500000	2933200000	1651700000	1751800000	2671800000	2159700000	455530000	27801000	54410000	46324000	0.109836	0.109758	0.106067	3	0.108554	0.00175851	40629000	75210000	42351000	0.0776288	0.157455	0.0988574	3	0.111314	0.033758	44917000
P161_RS0103330	P161_RS0103330	648	carboxypeptidase-like regulatory domain-containing protein			2	2	2	1	2	0	1	1	1	1	1	1	3.9	62.874	15035000	1831300	5943200	0	1827300	1419700	1526300	1128900	1042500	315840	455600	55494	180100	0	0.000219245	0.000363304	0	2	0.000291275	0.000149373	55372	43022	46252	0.000105798	9.0068e-05	0.000107963	3	0.000101276	7.97469e-06	34208
P161_RS0103335	P161_RS0103335	649	tRNA-dihydrouridine synthase family protein			7	7	7	4	4	1	1	0	0	1	1	1	31.2	36.629	32471000	5752300	4290700	4378600	1305600	0	0	3063900	10739000	2940600	1709000	302750	225830	230450	0.0011961	0.000455552	0.000527657	3	0.000726437	0.000333405	68718	0	0	0.000131298	0	0	1	0	0	161260
P161_RS0103340	P161_RS0103340	650	hypothetical protein			2	2	2	2	2	1	1	1	0	1	0	1	16.9	15.913	3633900	2033200	1253400	137570	0	63245	0	60187	0	86309	454240	254150	156680	17196	0.00100409	0.000316061	3.93733e-05	3	0.000453176	0.000405604	0	7905.6	0	0	1.65506e-05	0	1	0	0	7523.4
P161_RS0103345	P161_RS0103345	651	hypothetical protein			6	6	6	6	5	2	2	2	1	1	0	2	48.1	18.036	34896000	11771000	15400000	3160500	1870800	1037800	345600	222640	0	1087700	3172400	1070100	1400000	287320	0.00422774	0.00282413	0.000657871	3	0.00256992	0.00146844	170080	94345	31419	0.000324968	0.000197514	7.33395e-05	3	0.000198607	0.00010273	20240
P161_RS0103350	P161_RS0103350	652	endonuclease/exonuclease/phosphatase			14	14	14	10	9	10	5	7	7	6	6	5	37.2	37.909	66064000	6976400	14643000	23023000	1863400	3880700	3203200	4248500	6981200	1245200	3670200	387580	813490	1279000	0.00153125	0.001641	0.0029285	3	0.00203358	0.000634387	103520	215600	177960	0.000197793	0.000451366	0.000415401	3	0.000354853	0.000112025	236030
P161_RS17975	P161_RS17975	653	mechanosensitive ion channel family protein			16	16	16	11	12	13	11	12	11	11	10	11	35.6	62.454	303520000	16361000	62372000	84434000	35941000	27457000	27213000	19394000	23516000	6829000	9790800	527760	2012000	2723700	0.00208507	0.00405868	0.0062364	3	0.00412672	0.00169546	1159400	885720	877830	0.00221524	0.00185428	0.00204907	3	0.00203953	0.000147513	625620
P161_RS0103370	P161_RS0103370	656	gamma carbonic anhydrase family protein			9	9	9	7	7	5	4	5	3	4	0	6	38.6	18.505	190410000	31660000	46393000	6946100	5437200	3926800	1837400	35621000	0	58592000	27202000	4522800	6627500	992300	0.0178686	0.0133692	0.00227205	3	0.01117	0.00655444	776740	560970	262480	0.0014841	0.00117441	0.000612691	3	0.0010904	0.000360676	5088700
P161_RS0103380	P161_RS0103380	658	response regulator transcription factor	RR|LytTR		7	7	7	7	6	0	3	3	2	2	3	2	29.6	27.832	37195000	10882000	18467000	0	1668800	1206600	942090	1742800	1042600	1243400	2656800	777260	1319100	0	0.00307079	0.00266094	0	2	0.00286586	0.0013613	119200	86188	67292	0.000227753	0.000180437	0.000157076	3	0.000188422	2.94009e-05	124490
P161_RS0103385	P161_RS0103385	659	hypothetical protein	HK|Classic		17	17	17	11	6	11	6	4	5	3	5	5	22.6	84.512	70594000	9530100	6813100	17938000	6557500	2708900	2260600	2031700	3994300	18760000	1680800	226910	162220	427090	0.000896474	0.000327236	0.0009779	3	0.00073387	0.000289449	156130	64498	53824	0.000298314	0.000135029	0.000125638	3	0.000186327	7.92794e-05	48373
P161_RS0103400	P161_RS0103400	662	LysM peptidoglycan-binding domain-containing protein	CAZyme, multi-domain, contains a GH73 and a CBM50 domain		10	10	10	8	8	0	0	0	0	0	0	0	36.5	32.302	28734000	5178500	23555000	0	0	0	0	0	0	0	1915600	345230	1570300	0	0.00136393	0.00316767	0	2	0.0022658	0.00129734	0	0	0	0	0	0	0	0	0	0
P161_RS0103405	P161_RS0103405	663	pyridoxal-phosphate dependent enzyme			6	6	6	3	4	2	1	1	0	1	1	0	18.2	34.728	9368500	1293000	6792300	1283100	0	0	0	0	0	0	520470	71834	377350	71284	0.000283801	0.000761204	0.000163218	3	0.000402741	0.000258208	0	0	0	0	0	0	0	0	0	0
P161_RS0103425	P161_RS0103425	667	ABC-F family ATP-binding cassette domain-containing protein			32	32	32	25	26	27	5	9	7	6	7	7	63.7	72.937	454200000	84446000	126520000	139750000	9077600	77664000	7891200	2695000	2516400	3632700	14194000	2638900	3953900	4367300	0.0104257	0.00797595	0.00999972	3	0.00946714	0.00106868	283680	2427000	246600	0.00054202	0.00508101	0.000575624	3	0.00206622	0.00213182	84220
P161_RS0103445	P161_RS0103445	670	FAD-dependent oxidoreductase			20	20	20	12	16	16	4	5	5	2	5	3	58.1	39.835	249350000	20974000	56624000	73537000	5930800	5020400	4645600	14549000	58914000	9153500	11874000	998750	2696400	3501800	0.00394585	0.00543928	0.008018	3	0.00580104	0.00168201	282420	239070	221220	0.000539613	0.000500501	0.000516381	3	0.000518832	1.60612e-05	692790
P161_RS0103455	P161_RS0103455	672	gliding motility protein GldN			23	23	23	21	23	8	16	16	15	14	14	13	68	32.926	7326700000	639660000	1612600000	9491100	1098900000	678200000	1154600000	990670000	559130000	583410000	385620000	33667000	84874000	499530	0.133011	0.171211	0.00114376	3	0.101789	0.0728553	57839000	35695000	60770000	0.110512	0.0747287	0.141852	3	0.109031	0.0274229	52141000
P161_RS0103460	P161_RS0103460	673	gliding motility protein GldM			45	45	45	33	35	37	30	35	28	31	31	29	83.5	55.049	16827000000	424390000	1399200000	1795200000	1593200000	2740500000	1788400000	2792600000	3095100000	1198600000	580250000	14634000	48249000	61902000	0.0578159	0.0973296	0.141736	3	0.0989604	0.0342796	54939000	94500000	61669000	0.104971	0.197839	0.14395	3	0.14892	0.0380758	96295000
P161_RS0103465	P161_RS0103465	674	gliding motility protein GldL			20	20	20	15	18	7	13	14	14	13	12	11	70.4	22.985	10914000000	302210000	2254200000	60246000	702200000	1344900000	2282400000	1864200000	1081600000	1022400000	992220000	27474000	204920000	5477000	0.108544	0.413372	0.0125406	3	0.178152	0.170881	63836000	122270000	207490000	0.12197	0.255976	0.484332	3	0.287426	0.149596	169480000
P161_RS0103470	P161_RS0103470	675	gliding motility lipoprotein GldK	*		20	20	20	17	20	19	14	15	15	14	13	14	42.4	52.161	5175300000	306590000	469070000	588330000	635190000	839680000	599170000	800570000	419280000	517430000	235240000	13936000	21321000	26742000	0.0550582	0.0430095	0.0612306	3	0.0530995	0.0075666	28872000	38167000	27235000	0.055165	0.0799039	0.063573	3	0.066214	0.0102708	36390000
P161_RS0103475	P161_RS0103475	676	formimidoylglutamase			20	20	20	16	18	11	7	7	10	7	8	3	65.3	44.192	568280000	95235000	130470000	44479000	54360000	33180000	92781000	89619000	27420000	727790	25831000	4328900	5930600	2021800	0.0171026	0.0119634	0.00462928	3	0.0112318	0.00511842	2470900	1508200	4217300	0.00472109	0.00315747	0.00984419	3	0.00590758	0.00285586	4073600
P161_RS0103480	P161_RS0103480	677	type I DNA topoisomerase			56	56	56	50	46	39	26	25	18	29	28	26	72	94.648	3711300000	303640000	658180000	500880000	297250000	437280000	207560000	419970000	489550000	396980000	74226000	6072800	13164000	10018000	0.0239924	0.0265549	0.022938	3	0.0244951	0.00151877	5944900	8745600	4151200	0.0113588	0.0183092	0.0096899	3	0.0131193	0.00373253	8399300
P161_RS0103490	P161_RS0103490	678	beta-glucosidase BglX	CAZyme, single-domain, contains GH3 domain	Laminarin	33	33	33	28	28	28	11	9	11	10	11	11	54.6	84.452	1185100000	179250000	281640000	303390000	63434000	83158000	141450000	66790000	50227000	15793000	30388000	4596200	7221500	7779100	0.0181586	0.0145675	0.0178117	3	0.0168459	0.00161732	1626500	2132300	3626800	0.00310771	0.00446404	0.00846582	3	0.00534586	0.00227457	1712600
P161_RS0103495	P161_RS0103495	679	endonuclease/exonuclease/phosphatase family protein		Laminarin	20	20	20	11	16	0	6	4	4	5	7	6	58.8	31.923	128000000	22871000	89313000	0	5745100	3238800	719400	936840	3288800	1886800	6399900	1143500	4465600	0	0.00451773	0.00900817	0	2	0.00676295	0.00367758	287260	161940	35970	0.000548861	0.000339027	8.39626e-05	3	0.00032395	0.000190093	46842
P161_RS17980	P161_RS17980	680	family 16 glycosylhydrolase	CAZyme, single-domain, contains GH16 domain *	Laminarin	16	16	16	13	12	13	1	2	1	4	4	4	27.4	60.962	164310000	25351000	56689000	76738000	0	952730	0	1955300	1738400	883580	7468500	1152300	2576800	3488100	0.0045525	0.00519801	0.00798663	3	0.00591238	0.0014902	0	43306	0	0	9.06626e-05	0	1	0	0	88875
P161_RS0103505	P161_RS0103505	681	RagB/SusD family nutrient uptake outer membrane protein	SusD-like	Laminarin	33	33	33	24	27	28	23	23	21	17	18	19	61.6	61.166	7752300000	833930000	1353900000	1634700000	651880000	853450000	772670000	823120000	418790000	409970000	267320000	28756000	46685000	56367000	0.113609	0.0941747	0.129062	3	0.112282	0.0142737	22478000	29429000	26644000	0.0429482	0.0616106	0.0621935	3	0.0555841	0.00893811	28384000
P161_RS17985	P161_RS17985	682	SusC/RagA family TonB-linked outer membrane protein	SusC-like	Laminarin	66	66	66	53	62	59	35	32	29	34	35	29	70.9	112.83	17246000000	1669900000	3254500000	3297700000	1328400000	1707300000	1370400000	1451700000	2100600000	1065600000	351960000	34080000	66419000	67301000	0.134643	0.133983	0.154098	3	0.140908	0.00933057	27110000	34843000	27967000	0.0517984	0.072945	0.0652817	3	0.0633417	0.00874136	29627000
P161_RS0103515	P161_RS0103515	683	hypothetical protein	TR|LuxR	Laminarin	7	7	7	1	3	2	2	3	1	2	1	2	7.8	108.76	10181000	0	1375700	1053100	1201500	1190800	0	4935800	137810	286170	188540	0	25476	19501	0	5.13911e-05	4.46511e-05	2	4.80211e-05	2.2804e-05	22251	22052	0	4.25144e-05	4.61666e-05	0	2	4.43405e-05	2.09554e-05	91403
P161_RS0103525	P161_RS0103525	685	glycerol kinase GlpK			23	23	23	10	16	16	15	16	13	11	13	12	53	55.101	915340000	11542000	73553000	110830000	199270000	137570000	151970000	77769000	127130000	25705000	35205000	443930	2828900	4262800	0.00175388	0.00570656	0.00976045	3	0.0057403	0.00326876	7664400	5291000	5844900	0.0146442	0.0110769	0.0136434	3	0.0131215	0.00150237	2991100
P161_RS0103530	P161_RS0103530	686	sulfatase-like hydrolase/transferase	Sulfatase|S1_40		10	10	10	6	6	8	5	5	4	4	5	3	19.7	55.739	89476000	7399800	13150000	15335000	18965000	11652000	7985000	4949600	7062800	2976500	4473800	369990	657520	766740	0.00146175	0.00132637	0.00175559	3	0.00151457	0.000179163	948250	582590	399250	0.0018118	0.00121967	0.000931945	3	0.00132114	0.000366294	247480
P161_RS0103540	P161_RS0103540	687	tRNA (N6-isopentenyl adenosine(37)-C2)-methylthiotransferase MiaB			10	10	10	4	4	3	1	2	0	0	0	0	25.2	55.18	22642000	356890	10655000	9914600	941180	774700	0	0	0	0	870840	13727	409790	381330	5.42325e-05	0.000826643	0.000873124	3	0.000584667	0.000375553	36199	29796	0	6.91645e-05	6.23789e-05	0	2	6.57717e-05	3.11286e-05	0
P161_RS0103545	P161_RS0103545	688	sigma-54-dependent Fis family transcriptional regulator	ODP|Fis		24	24	24	14	20	19	9	6	8	9	9	9	57.7	46.604	711000000	31355000	84336000	130980000	113380000	69646000	33742000	118720000	84848000	43991000	30913000	1363300	3666800	5695000	0.00538612	0.0073968	0.0130397	3	0.00860755	0.00323974	4929500	3028100	1467100	0.00941867	0.00633943	0.00342456	3	0.00639422	0.00244739	5161600
P161_RS0103550	P161_RS0103550	689	LptE family protein			10	10	10	6	7	5	5	7	5	7	0	6	61	18.287	857960000	33566000	137470000	46015000	27856000	40593000	22897000	298340000	0	251230000	122570000	4795200	19638000	6573600	0.0189448	0.0396145	0.0150514	3	0.0245369	0.0107793	3979400	5799100	3271100	0.00760334	0.0121406	0.00763553	3	0.00912649	0.00213134	42620000
P161_RS0103555	P161_RS0103555	690	hypothetical protein			14	14	14	8	10	0	3	2	1	1	1	3	48	29.002	54716000	11615000	36058000	0	3372100	146470	273050	2242800	292060	716520	3908300	829640	2575600	0	0.00327774	0.00519559	0	2	0.00423666	0.00214517	240870	10462	19504	0.000460224	2.19025e-05	4.5527e-05	3	0.000175885	0.00020129	160200
P161_RS0103565	P161_RS0103565	692	co-chaperone GroES			11	11	11	10	9	9	7	8	5	5	0	7	84.6	9.6531	445310000	59943000	89911000	59001000	63854000	49419000	27844000	28322000	0	67020000	55664000	7492900	11239000	7375200	0.0296029	0.0226717	0.0168869	3	0.0230538	0.00519833	7981700	6177400	3480500	0.0152504	0.0129326	0.00812432	3	0.0121025	0.00296785	3540200
P161_RS0103570	P161_RS0103570	693	chaperonin GroEL			66	66	66	50	54	58	50	49	46	37	32	39	80	57.481	47530000000	2806200000	6568600000	8530300000	7585400000	7573500000	4085900000	5627800000	2422500000	2329700000	1584300000	93540000	218950000	284340000	0.369557	0.441674	0.651048	3	0.487426	0.119385	252850000	252450000	136200000	0.483114	0.528512	0.317924	3	0.443183	0.0904904	187590000
P161_RS0103595	P161_RS0103595	698	GAF domain-containing protein			4	4	4	3	3	4	2	2	3	3	0	3	23.3	16.947	199460000	7958100	6546800	9135800	77348000	61532000	1042800	23017000	0	12884000	39893000	1591600	1309400	1827200	0.00628808	0.00264137	0.0041837	3	0.00437105	0.00149465	15470000	12306000	208570	0.0295581	0.025763	0.000486852	3	0.0186027	0.0129032	4603300
P161_RS0103600	P161_RS0103600	699	bifunctional phosphoribosylaminoimidazolecarboxamide formyltransferase/IMP cyclohydrolase			33	33	33	23	24	26	21	19	20	21	19	19	65.7	55.773	10553000000	828870000	2038400000	2106400000	1399400000	1022000000	892690000	946170000	902160000	416950000	390850000	30699000	75495000	78014000	0.121285	0.152291	0.178627	3	0.150735	0.0234355	51831000	37852000	33062000	0.0990322	0.0792444	0.0771747	3	0.0851504	0.00985221	35043000
P161_RS0103605	P161_RS0103605	700	rod shape-determining protein			25	25	25	16	16	19	16	15	15	15	15	10	71.3	37.417	4171600000	289730000	679320000	578620000	462690000	606670000	392880000	638890000	447770000	75034000	260730000	18108000	42457000	36164000	0.071541	0.0856458	0.082804	3	0.0799969	0.00609078	28918000	37917000	24555000	0.0552529	0.0793805	0.0573173	3	0.0639836	0.0109199	39931000
P161_RS0103610	P161_RS0103610	701	rod shape-determining protein MreC			5	5	5	4	5	4	3	2	3	3	2	1	18.2	31.162	28368000	3060400	9864700	2433200	2974800	2198200	1729900	3351300	2223900	532070	1418400	153020	493240	121660	0.00060455	0.000994982	0.000278563	3	0.000626032	0.000292871	148740	109910	86495	0.000284194	0.0002301	0.0002019	3	0.000238731	3.41461e-05	167560
P161_RS0103620	P161_RS0103620	703	penicillin-binding protein 2			16	16	16	12	14	13	4	4	4	1	1	1	26.6	71.261	75206000	9840300	25404000	19524000	3551200	4174400	11381000	299950	600810	430900	2426000	317430	819470	629800	0.0012541	0.00165306	0.00144204	3	0.00144974	0.000162967	114550	134660	367130	0.000218868	0.000281915	0.00085697	3	0.000452584	0.0002871	9675.9
P161_RS0103630	P161_RS0103630	705	30S ribosomal protein S20			4	4	4	3	4	3	2	3	1	3	0	3	28.9	9.462	869840000	44713000	123490000	119480000	73160000	63189000	47053000	53085000	0	345680000	869840000	44713000	123490000	119480000	0.176652	0.249109	0.273571	3	0.23311	0.0411525	73160000	63189000	47053000	0.139785	0.132288	0.109833	3	0.127302	0.012726	53085000
P161_RS0103640	P161_RS0103640	707	proline--tRNA ligase			33	33	33	23	28	29	18	17	18	19	19	16	67.1	56.084	2782400000	176680000	499450000	338520000	344500000	312190000	280050000	372680000	360280000	98062000	95945000	6092500	17222000	11673000	0.0240702	0.0347408	0.0267274	3	0.0285128	0.00453552	11879000	10765000	9656700	0.0226969	0.0225369	0.0225411	3	0.0225916	7.44735e-05	12851000
P161_RS18950	P161_RS18950	708	hypothetical protein			5	5	5	3	4	5	3	3	3	2	2	1	11.8	40.847	445930000	22885000	81240000	50833000	82177000	163290000	36689000	4393000	3581500	840640	34302000	1760300	6249200	3910200	0.00695458	0.0126061	0.00895311	3	0.0095046	0.00233995	6321300	12561000	2822200	0.012078	0.0262969	0.00658769	3	0.0149875	0.0083051	337930
P161_RS0103660	P161_RS0103660	709	hemin receptor			14	14	14	12	13	12	9	9	9	9	7	8	45.6	52.19	7875400000	188310000	573220000	600230000	1034900000	1305100000	1085900000	1289900000	1255300000	542440000	875040000	20923000	63691000	66692000	0.0826624	0.12848	0.152703	3	0.121282	0.0290435	114990000	145010000	120650000	0.219709	0.303583	0.281626	3	0.268306	0.0355135	143330000
P161_RS0103665	P161_RS0103665	710	NifU family protein			19	19	19	12	16	4	9	9	8	8	7	6	86.4	33.372	1248700000	61780000	164900000	9994200	127710000	105180000	424450000	174990000	92557000	87093000	69370000	3432200	9161300	555230	0.0135599	0.0184805	0.0012713	3	0.0111039	0.00723709	7095200	5843300	23581000	0.0135566	0.0122331	0.0550437	3	0.0269445	0.0198765	9721400
P161_RS0103670	P161_RS0103670	711	bifunctional demethylmenaquinone methyltransferase/2-methoxy-6-polyprenyl-1,4-benzoquinol methylase UbiE			11	11	11	7	10	1	6	5	3	9	7	4	60.1	26.552	1634600000	22429000	398760000	0	302030000	71174000	100020000	409690000	292300000	38210000	136220000	1869100	33230000	0	0.00738443	0.0670328	0	2	0.0372086	0.0300108	25169000	5931200	8335000	0.0480898	0.0124172	0.0194559	3	0.0266543	0.0154272	34141000
P161_RS0103675	P161_RS0103675	712	PorT family protein			7	7	7	6	5	1	2	1	2	1	2	1	37	26.936	116950000	54229000	18298000	18738000	5727700	786170	9771500	2122400	5352000	1921900	9745600	4519100	1524800	1561500	0.017854	0.00307588	0.00357534	3	0.00816842	0.0068518	477310	65514	814290	0.000911984	0.000137156	0.00190075	3	0.000983296	0.000721747	176870
P161_RS0103680	P161_RS0103680	713	RNA methyltransferase			6	6	6	3	6	0	1	1	1	1	1	1	33.7	27.09	69463000	13202000	54888000	0	0	0	0	775160	489320	109190	7718100	1466800	6098600	0	0.00579502	0.0123023	0	2	0.00904867	0.00502521	0	0	0	0	0	0	0	0	0	86129
P161_RS0103685	P161_RS0103685	714	membrane protein			19	19	19	9	12	10	5	5	1	6	8	5	26.3	95.357	69948000	8251700	17924000	12844000	4336600	2683900	330430	5310300	6878400	11387000	1589700	187540	407370	291920	0.000740932	0.000821762	0.000668404	3	0.000743699	6.26387e-05	98558	60998	7509.7	0.000188312	0.000127701	1.75294e-05	3	0.000111181	7.06937e-05	120690
P161_RS0103690	P161_RS0103690	715	class II fructose-bisphosphate aldolase			32	32	32	27	29	29	26	27	25	24	21	23	82.3	38.946	82352000000	5195200000	9732800000	9498900000	8862600000	11380000000	8059500000	9568900000	12045000000	8009700000	4334300000	273430000	512250000	499940000	1.08027	1.03333	1.1447	3	1.0861	0.0456548	466450000	598930000	424190000	0.891235	1.25388	0.990161	3	1.04509	0.15306	503620000
P161_RS0103695	P161_RS0103695	716	acetyl-CoA carboxylase, carboxyltransferase subunit beta			21	21	21	15	19	5	13	13	13	10	11	8	71.3	32.152	2855500000	212910000	725320000	9297300	306590000	356190000	308350000	395290000	265780000	275740000	219650000	16378000	55794000	715180	0.0647061	0.11255	0.00163753	3	0.0596311	0.0454217	23584000	27399000	23719000	0.0450614	0.0573607	0.0553658	3	0.052596	0.00538966	30407000
P161_RS0103700	P161_RS0103700	717	30S ribosomal protein S15			11	11	11	8	10	7	7	7	8	6	0	9	85.4	10.348	9035700000	394720000	590360000	886720000	1682000000	1245100000	1201200000	919760000	0	2115800000	1807100000	78943000	118070000	177340000	0.311887	0.238175	0.406052	3	0.318705	0.0687048	336410000	249020000	240240000	0.64277	0.521332	0.560778	3	0.57496	0.0505812	183950000
P161_RS0103705	P161_RS0103705	718	polyribonucleotide nucleotidyltransferase			45	45	45	43	38	38	29	27	32	32	29	30	62.8	82.327	14140000000	772370000	1322300000	1576100000	2067500000	1776900000	1695200000	1461600000	1971600000	1497000000	415890000	22717000	38890000	46355000	0.0897502	0.0784503	0.106138	3	0.0914462	0.0113669	60808000	52260000	49858000	0.116184	0.109408	0.116381	3	0.113991	0.00324161	42987000
P161_RS0103715	P161_RS0103715	720	tyrosine-type recombinase/integrase			3	3	3	2	2	0	1	1	1	3	2	2	6.7	45.024	6252400	773720	297240	0	873850	962460	1009100	1372700	664310	299000	260520	32238	12385	0	0.000127366	2.49835e-05	0	2	7.61746e-05	5.51042e-05	36410	40103	42045	6.95677e-05	8.3957e-05	9.81431e-05	3	8.38893e-05	1.1666e-05	57197
P161_RS0103725	P161_RS0103725	722	hypothetical protein			5	5	5	3	5	2	2	1	1	1	1	0	28	24.743	49329000	1255300	9079100	2335800	1210400	729610	228820	29747000	4742600	0	5481000	139480	1008800	259540	0.000551057	0.00203499	0.000594264	3	0.0010601	0.000689574	134490	81067	25424	0.000256967	0.000169716	5.93457e-05	3	0.00016201	8.08623e-05	3305300
P161_RS0103735	P161_RS0103735	724	T9SS type A sorting domain-containing protein			4	4	4	4	4	2	2	3	2	3	2	1	10	39.003	13475000	1636600	2768600	2107300	138800	1105600	277900	2998000	2159400	282430	1497200	181850	307630	234140	0.000718452	0.000620562	0.000536106	3	0.00062504	7.45097e-05	15422	122840	30878	2.94664e-05	0.00025717	7.20767e-05	3	0.000119571	9.88398e-05	333110
P161_RS0103750	P161_RS0103750	727	hypothetical protein			12	12	12	7	8	4	5	5	3	6	1	6	73.9	17.72	299230000	9000200	11796000	27930000	30636000	25227000	22753000	74782000	34644000	62460000	29923000	900020	1179600	2793000	0.00355579	0.00237953	0.00639508	3	0.00411013	0.00168555	3063600	2522700	2275300	0.00585354	0.00528136	0.0053111	3	0.005482	0.000263003	7478200
P161_RS0103755	P161_RS0103755	728	hypothetical protein			9	9	9	5	4	1	4	4	2	2	3	1	29.4	38.676	32833000	2834800	6357700	419500	3832100	10678000	2679000	445800	5505200	81622	1931400	166750	373980	24676	0.000658795	0.000754406	5.65002e-05	3	0.0004899	0.000308936	225420	628100	157590	0.000430704	0.00131495	0.000367853	3	0.000704502	0.000432413	26224
P161_RS0103760	P161_RS0103760	729	restriction endonuclease or methylase			20	20	20	14	15	6	9	6	8	7	6	7	69.7	40.754	473600000	94488000	202640000	18886000	25636000	6663200	17078000	49246000	26617000	32348000	24927000	4973000	10665000	994000	0.0196473	0.0215138	0.00227594	3	0.014479	0.00866246	1349300	350700	898860	0.00257807	0.000734202	0.00209816	3	0.00180348	0.000781064	2591900
P161_RS0103790	P161_RS0103790	735	hypothetical protein			35	35	35	34	34	23	23	22	22	19	18	18	66.7	35.674	10740000000	979790000	2807200000	396870000	1263800000	1182200000	1862500000	777010000	823380000	647360000	565270000	51568000	147750000	20888000	0.203734	0.298047	0.0478268	3	0.183203	0.103178	66518000	62223000	98024000	0.127094	0.130266	0.228812	3	0.162057	0.0472202	40895000
P161_RS0103795	P161_RS0103795	736	TonB-dependent receptor			33	33	33	30	26	29	17	15	15	13	13	14	51.2	78.5	2662300000	252090000	554330000	719950000	195870000	226850000	200620000	241020000	87951000	183610000	66557000	6302300	13858000	17999000	0.0248991	0.0279549	0.041212	3	0.0313553	0.00708048	4896800	5671200	5015400	0.0093562	0.0118728	0.0117071	3	0.0109787	0.0011493	6025500
P161_RS0103800	P161_RS0103800	737	hypothetical protein			5	5	5	5	5	5	4	4	4	5	5	5	39.4	22.763	4279400000	130140000	343230000	1341700000	492000000	320360000	479090000	315330000	514810000	342730000	1069800000	32536000	85807000	335410000	0.128543	0.173093	0.767982	3	0.356539	0.291502	123000000	80091000	119770000	0.235013	0.167673	0.279572	3	0.227419	0.045997	78832000
P161_RS0103805	P161_RS0103805	738	DoxX family membrane protein			4	4	4	3	4	3	3	3	2	1	0	2	24.8	17.176	98599000	16874000	12794000	15136000	24690000	26806000	1029300	254430	0	1015800	24650000	4218400	3198400	3783900	0.016666	0.00645193	0.00866392	3	0.010594	0.00438754	6172600	6701600	257310	0.0117938	0.01403	0.000600623	3	0.00880816	0.00587497	63607
P161_RS0103810	P161_RS0103810	739	dihydroorotase			10	10	10	8	8	8	4	2	0	3	5	3	23.3	52.118	46989000	3750300	10059000	13776000	2923600	455650	0	4297300	9677100	2051300	1678200	133940	359230	491990	0.000529169	0.000724652	0.0011265	3	0.00079344	0.000248663	104420	16273	0	0.000199513	3.40681e-05	0	2	0.00011679	8.71384e-05	153480
P161_RS0103820	P161_RS0103820	740	SAVED domain-containing protein			19	19	19	15	15	15	6	7	8	7	5	2	48	42.983	670100000	22925000	152210000	165310000	18704000	62425000	77846000	84601000	84660000	1423600	39417000	1348500	8953300	9723900	0.00532764	0.0180609	0.0222646	3	0.0152177	0.00720084	1100200	3672100	4579200	0.00210213	0.00768766	0.010689	3	0.00682625	0.00355808	4976500
P161_RS18005	P161_RS18005	741	hypothetical protein			15	15	15	10	12	12	9	8	10	8	9	8	33	51.711	201460000	11344000	44425000	65617000	19710000	10520000	6251500	24742000	13907000	4940900	8058300	453750	1777000	2624700	0.00179267	0.00358463	0.00600972	3	0.00379568	0.00172806	788390	420800	250060	0.00150636	0.000880959	0.0005837	3	0.000990339	0.000384532	989670
P161_RS0103830	P161_RS0103830	742	AhpC/TSA family protein			25	25	25	17	21	12	9	8	7	8	13	11	44.2	43.029	776140000	96312000	227600000	101910000	24141000	14992000	10500000	56053000	152930000	91710000	38807000	4815600	11380000	5095300	0.0190254	0.0229561	0.0116666	3	0.0178827	0.00467923	1207100	749610	524990	0.00230638	0.00156933	0.00122545	3	0.00170039	0.00045091	2802700
P161_RS0103835	P161_RS0103835	743	hypothetical protein			13	13	13	12	11	8	4	4	5	3	2	0	35.5	35.464	108500000	22781000	52802000	18413000	2668900	2275500	3497700	4919600	1140700	0	7233200	1518700	3520200	1227500	0.00600007	0.00710108	0.00281058	3	0.00530391	0.00181944	177930	151700	233180	0.000339966	0.000317589	0.000544298	3	0.000400618	0.000102007	327970
P161_RS0103840	P161_RS0103840	744	hypothetical protein			15	15	15	9	12	1	8	4	7	4	4	1	51.6	35.337	100780000	9983100	57221000	1263900	14596000	1061200	12736000	2444000	1184900	285680	8398000	831930	4768500	105320	0.00328678	0.00961919	0.000241149	3	0.00438237	0.00390616	1216300	88430	1061300	0.00232395	0.000185131	0.00247733	3	0.00166214	0.00104628	203670
P161_RS0103845	P161_RS0103845	745	TlpA family protein disulfide reductase			22	22	21	18	15	18	10	10	6	7	6	7	44.2	58.051	727430000	47136000	172040000	90663000	118320000	63628000	8568600	39750000	132330000	55001000	22732000	1473000	5376300	2833200	0.00581952	0.0108453	0.00648712	3	0.0077173	0.00222853	3697600	1988400	267770	0.00706491	0.00416278	0.00062504	3	0.00395091	0.00263333	1242200
P161_RS0103850	P161_RS0103850	746	hypothetical protein			2	2	2	0	2	1	0	0	0	1	1	0	11.4	26.274	10151000	0	7713800	1273300	0	0	0	0	1164000	0	1268900	0	964230	159160	0	0.00194508	0.000364426	2	0.00115475	0.000844236	0	0	0	0	0	0	0	0	0	0
P161_RS0103860	P161_RS0103860	748	AraC family transcriptional regulator			2	2	2	1	1	1	0	0	1	0	0	1	14.6	17.618	0	0	0	0	0	0	0	0	0	0	0	0	0	0	0	0	0	0	0	0	0	0	0	0	0	0	0	0	0	0
P161_RS0103870	P161_RS0103870	750	hypothetical protein			3	3	3	0	0	1	0	1	1	1	0	2	26.3	8.3783	1885200	0	0	263760	0	360720	319310	330750	0	610640	269310	0	0	37679	0	0	8.62729e-05	1	0	0	0	51531	45616	0	0.000107882	0.000106479	2	0.00010718	5.05285e-05	47249
P161_RS0103875	P161_RS0103875	751	hypothetical protein			10	10	10	8	9	8	3	2	2	2	2	1	30.5	40.734	56727000	6884600	19187000	13052000	7738500	2041900	3001000	1548500	2630300	644160	3336900	404970	1128600	767750	0.00159995	0.00227665	0.0017579	3	0.00187817	0.000289055	455200	120110	176530	0.000869739	0.000251454	0.000412063	3	0.000511086	0.000261946	91087
P161_RS0103885	P161_RS0103885	752	helix-turn-helix transcriptional regulator	TR|ArsR		2	2	2	2	1	0	0	0	0	0	0	0	14.6	14.048	4257900	3499000	758970	0	0	0	0	0	0	0	532240	437370	94872	0	0.00172796	0.000191379	0	2	0.000959669	0.000773415	0	0	0	0	0	0	0	0	0	0
P161_RS0103890	P161_RS0103890	753	mercuric transport protein MerTP			2	2	2	0	0	1	1	0	1	0	1	0	9.6	21.629	1224600	0	0	319380	352320	0	0	0	552930	0	153080	0	0	39922	0	0	9.14086e-05	1	0	0	44040	0	0	8.41461e-05	0	0	1	0	0	0
P161_RS0103895	P161_RS0103895	754	organomercurial lyase			3	3	3	3	3	0	0	0	0	0	0	0	16.3	22.864	5147700	1779700	3368000	0	0	0	0	0	0	0	857950	296610	561340	0	0.00117184	0.00113236	0	2	0.0011521	0.000543344	0	0	0	0	0	0	0	0	0	0
P161_RS0103900	P161_RS0103900	755	mercury(II) reductase			17	17	17	14	13	15	7	10	8	7	7	3	37.3	62.244	383990000	76628000	55902000	101810000	53049000	45681000	10021000	16322000	22888000	1688700	14769000	2947200	2150100	3915900	0.0116438	0.00433726	0.00896616	3	0.00831573	0.00301812	2040300	1756900	385410	0.00389835	0.00367813	0.00089964	3	0.00282537	0.00136466	627750
P161_RS0103905	P161_RS0103905	756	hypothetical protein			4	4	4	1	1	2	1	0	1	1	0	2	6.3	81.322	5435300	750770	1389900	1182500	0	0	1808200	303890	0	0	150980	20855	38608	32848	8.23938e-05	7.78815e-05	7.52114e-05	3	7.84956e-05	2.96416e-06	0	0	50228	0	0	0.000117244	1	0	0	8441.4
P161_RS18010	P161_RS18010	758	hypothetical protein			4	4	4	4	4	2	2	2	1	1	0	2	59.7	8.2474	136280000	14767000	18689000	4274400	55976000	9674100	0	283570	0	32620000	45428000	4922300	6229500	1424800	0.019447	0.0125664	0.00326234	3	0.0117586	0.006632	18659000	3224700	0	0.0356513	0.00675102	0	2	0.0212012	0.0154626	94522
P161_RS19315	P161_RS19315	759	hypothetical protein			4	4	4	4	4	1	1	1	1	2	0	1	59.1	7.6228	88061000	16261000	23121000	3084200	0	1487900	569710	41599000	0	1939200	17612000	3252200	4624100	616830	0.0128488	0.0093279	0.00141234	3	0.007863	0.00478243	0	297590	113940	0	0.000623015	0.000265963	2	0.000444489	0.000255249	8319800
P161_RS0103925	P161_RS0103925	760	hypothetical protein			8	8	8	6	5	4	2	5	3	0	1	1	32.4	30.291	15745000	2754400	3753700	2651100	1049200	3352200	991390	0	833430	359810	1124700	196740	268120	189370	0.000777279	0.000540861	0.000433597	3	0.000583912	0.000143572	74940	239450	70814	0.000143186	0.000501297	0.000165297	3	0.000269926	0.000163852	0
P161_RS0103955	P161_RS0103955	766	hypothetical protein			11	11	11	9	9	7	2	3	0	2	1	1	40.4	34.939	99705000	33994000	47125000	8580400	2887600	2051000	0	2400900	1010700	1654900	5865000	1999700	2772100	504730	0.0079004	0.00559198	0.00115567	3	0.00488268	0.00279883	169860	120650	0	0.000324547	0.000252585	0	2	0.000288566	0.000139168	141230
P161_RS0103960	P161_RS0103960	767	hypothetical protein			2	2	2	2	2	1	0	0	0	0	0	0	9.3	25.402	10442000	3181800	5262800	1997300	0	0	0	0	0	0	1044200	318180	526280	199730	0.00125706	0.00106163	0.000457318	3	0.000925337	0.000340421	0	0	0	0	0	0	0	0	0	0
P161_RS0103965	P161_RS0103965	768	hypothetical protein			4	4	4	3	3	0	1	1	0	1	1	0	11.5	31.04	23604000	4251700	5838200	0	1546000	5443100	0	3516200	3008600	0	1573600	283450	389210	0	0.00111985	0.000785129	0	2	0.00095249	0.000469342	103070	362870	0	0.000196933	0.00075968	0	2	0.000478307	0.000321901	234410
P161_RS0103980	P161_RS0103980	771	tetratricopeptide repeat protein			3	3	3	2	2	0	0	1	0	0	0	0	10.4	34.415	4519500	2963400	1556000	0	0	0	0	0	0	0	282470	185220	97251	0	0.000731766	0.000196178	0	2	0.000463972	0.000309268	0	0	0	0	0	0	0	0	0	0
P161_RS0103985	P161_RS0103985	772	2-amino-4-hydroxy-6-hydroxymethyldihydropteridine diphosphokinase			11	11	11	8	6	3	3	0	2	0	1	1	33.4	43.513	24751000	7966700	8366400	1045300	4394000	0	1444800	0	1533700	0	1076100	346380	363760	45446	0.00136848	0.00073379	0.000104057	3	0.000735441	0.000516198	191050	0	62816	0.000365035	0	0.000146628	2	0.000255831	0.000149982	0
P161_RS0103990	P161_RS0103990	773	gliding motility protein GldC			2	2	2	0	1	0	0	0	0	0	1	0	35.1	12.866	1241900	0	1241900	0	0	0	0	0	0	0	206990	0	206990	0	0	0.000417548	0	1	0	0	0	0	0	0	0	0	0	0	0	0
P161_RS0103995	P161_RS0103995	774	gliding motility lipoprotein GldB			18	18	18	15	14	12	5	7	7	2	3	2	53.9	37.713	311240000	25670000	60619000	69207000	31285000	63762000	53789000	3437600	2894000	581950	14147000	1166800	2755400	3145800	0.00460979	0.00555829	0.00720288	3	0.00579032	0.00107126	1422000	2898300	2445000	0.00271698	0.00606769	0.00570722	3	0.00483063	0.0015018	156250
P161_RS0104000	P161_RS0104000	775	NAD(+) synthase			15	15	15	13	14	4	6	6	6	8	8	6	61.1	28.847	1150000000	82122000	354570000	10093000	66619000	42887000	101110000	197470000	158930000	136150000	71873000	5132600	22161000	630810	0.0202778	0.044704	0.00144435	3	0.0221421	0.0177098	4163700	2680400	6319600	0.00795548	0.00561151	0.0147515	3	0.00943948	0.00387612	12342000
P161_RS0104015	P161_RS0104015	776	DNA primase			16	16	16	9	10	11	7	6	6	2	2	3	24.8	77.993	99294000	14025000	17796000	21220000	6392000	18307000	3854100	9054300	1330900	7315200	3102900	438280	556110	663120	0.00173155	0.00112181	0.00151833	3	0.00145723	0.00025265	199750	572100	120440	0.000381657	0.00119771	0.000281136	3	0.000620168	0.000410441	282950
P161_RS0104020	P161_RS0104020	777	ATP-dependent Clp protease ATP-binding subunit ClpX			22	22	22	16	18	14	11	6	11	7	6	6	54.5	45.599	1585400000	251900000	481580000	293120000	210560000	9485300	218720000	67040000	43977000	8976400	68928000	10952000	20938000	12744000	0.0432691	0.0422369	0.0291797	3	0.0382286	0.00641238	9154600	412400	9509500	0.0174915	0.000863373	0.0221975	3	0.0135174	0.0091517	2914800
P161_RS0104025	P161_RS0104025	778	ATP-dependent Clp endopeptidase proteolytic subunit ClpP			12	12	12	9	9	4	6	4	5	4	7	4	53.6	24.687	8768800000	301960000	543100000	1048400000	1505000000	1056500000	737270000	1046900000	1345800000	1184000000	876880000	30196000	54310000	104840000	0.119298	0.109556	0.24005	3	0.156301	0.0593526	150500000	105650000	73727000	0.287557	0.221182	0.172097	3	0.226945	0.0473122	104690000
P161_RS0104030	P161_RS0104030	779	trigger factor			51	51	51	39	48	44	28	24	24	27	22	21	80.3	50.659	6378500000	375830000	1353900000	1046100000	819730000	489360000	497140000	901290000	648540000	246680000	255140000	15033000	54155000	41843000	0.0593923	0.109243	0.0958071	3	0.0881476	0.02106	32789000	19574000	19885000	0.0626491	0.0409788	0.0464164	3	0.0500148	0.00920551	36052000
P161_RS0104040	P161_RS0104040	780	sterol desaturase family protein			3	3	3	0	2	0	0	0	0	1	0	0	12.9	35.079	3609900	0	3082900	0	0	0	0	527000	0	0	257850	0	220210	0	0	0.000444216	0	1	0	0	0	0	0	0	0	0	0	0	0	37643
P161_RS0104045	P161_RS0104045	781	NAD(P)/FAD-dependent oxidoreductase			17	17	17	11	12	6	6	7	5	7	8	7	48.3	38.964	131190000	25360000	54046000	9415000	4844200	3822700	3593900	7828400	8799100	13482000	6904800	1334700	2844500	495530	0.00527312	0.00573803	0.00113461	3	0.00404859	0.00206922	254960	201200	189150	0.000487146	0.000421219	0.000441522	3	0.000449962	2.75683e-05	412020
P161_RS0104050	P161_RS0104050	782	elongation factor 4			30	30	30	24	27	27	17	13	10	10	12	14	49.7	66.939	3476800000	362220000	733460000	620460000	399410000	522630000	175970000	310850000	109050000	242710000	139070000	14489000	29338000	24819000	0.057243	0.0591817	0.0568276	3	0.0577508	0.00102593	15976000	20905000	7038800	0.0305249	0.0437653	0.0164303	3	0.0302402	0.0111613	12434000
P161_RS0104060	P161_RS0104060	784	heme-binding protein			11	11	11	6	5	8	3	1	1	1	1	1	70.6	22.274	89154000	7714200	25029000	52822000	2163800	266260	306440	152230	518940	181600	8104900	701290	2275300	4802000	0.00277065	0.00458982	0.010995	3	0.00611851	0.00352731	196710	24205	27858	0.000375849	5.0674e-05	6.50273e-05	3	0.00016385	0.00015002	13839
P161_RS0104065	P161_RS0104065	785	EF-hand domain-containing protein			3	3	3	1	3	1	0	0	0	0	0	0	30.8	10.14	3263300	252140	2647500	363600	0	0	0	0	0	0	652650	50428	529500	72721	0.000199231	0.00106813	0.000166508	3	0.000477955	0.000417528	0	0	0	0	0	0	0	0	0	0
P161_RS0104075	P161_RS0104075	787	hypothetical protein	*		16	16	16	13	14	14	8	8	9	7	7	5	58.1	41.332	990110000	114520000	142240000	198870000	71155000	166080000	123560000	62188000	82193000	29296000	49505000	5726200	7112000	9943500	0.022623	0.0143466	0.0227674	3	0.0199124	0.00393603	3557800	8303900	6178100	0.0067978	0.0173845	0.0144212	3	0.0128678	0.00445938	3109400
P161_RS0104080	P161_RS0104080	788	M28 family peptidase			12	12	12	6	10	8	8	6	7	8	11	9	30.7	45.315	466750000	5294700	27184000	28405000	35458000	4813900	37938000	93975000	194900000	38779000	19448000	220610	1132700	1183500	0.000871584	0.00228492	0.00270984	3	0.00195545	0.000785794	1477400	200580	1580800	0.00282283	0.000419921	0.00368997	3	0.00231091	0.0013832	3915600
P161_RS0104095	P161_RS0104095	791	response regulator	RR|LytTR		4	4	4	2	3	0	1	1	0	3	1	1	13.5	29.043	156640000	905080	7203300	0	1319900	2831500	0	139590000	4459900	337670	10443000	60339	480220	0	0.000238387	0.000968717	0	2	0.000603552	0.000412125	87991	188770	0	0.000168122	0.000395196	0	2	0.000281659	0.000161935	9305700
P161_RS0104100	P161_RS0104100	792	tRNA dihydrouridine synthase DusB			14	14	14	9	13	11	2	2	2	1	1	1	48.5	37.473	49223000	2776900	16528000	10431000	4954500	9531800	4207100	201740	123560	468900	2343900	132230	787020	496700	0.000522413	0.00158761	0.00113728	3	0.00108243	0.000436589	235930	453890	200340	0.000450786	0.000950234	0.000467642	3	0.000622887	0.000231571	9606.6
P161_RS0104105	P161_RS0104105	793	hypothetical protein			2	2	2	0	0	2	0	0	0	0	0	0	17	20.198	205320	0	0	205320	0	0	0	0	0	0	20532	0	0	20532	0	0	4.70117e-05	1	0	0	0	0	0	0	0	0	0	0	0	0
P161_RS0104110	P161_RS0104110	794	ABC transporter permease			6	6	6	5	5	3	2	2	3	1	1	1	14.8	44.93	19958000	5318100	5535000	3512900	2117600	624320	1065600	774380	764910	245450	1247400	332380	345940	219550	0.00131316	0.000697843	0.000502699	3	0.000837902	0.000345375	132350	39020	66601	0.000252878	8.16897e-05	0.000155463	3	0.000163343	7.01091e-05	48399
P161_RS0104115	P161_RS0104115	795	30S ribosome-binding factor RbfA			9	9	9	8	9	6	3	3	2	3	2	5	58.8	14.856	179010000	40226000	42242000	13670000	8310400	5624000	3717500	35168000	501530	29546000	17901000	4022600	4224200	1367000	0.0158925	0.00852121	0.00312999	3	0.00918122	0.00523111	831040	562400	371750	0.00158785	0.0011774	0.000867754	3	0.001211	0.000294935	3516800
P161_RS0104125	P161_RS0104125	797	two-component sensor histidine kinase	HK|Classic		9	9	9	5	6	2	1	0	0	2	1	1	37.3	28.448	23702000	4416900	16361000	1856600	253600	0	0	531400	124770	157130	1580100	294460	1090700	123770	0.00116335	0.0022002	0.000283394	3	0.00121565	0.000783406	16907	0	0	3.23038e-05	0	0	1	0	0	35427
P161_RS0104135	P161_RS0104135	799	hypothetical protein			6	6	6	2	3	3	2	3	1	0	1	1	28.2	23.871	13371000	965900	5639000	971660	752650	2529000	1250700	0	722330	539420	1028500	74300	433770	74743	0.000293544	0.000875017	0.000171138	3	0.000446566	0.000307054	57896	194540	96208	0.00011062	0.000407276	0.000224573	3	0.00024749	0.000122188	0
P161_RS0104145	P161_RS0104145	801	F0F1 ATP synthase subunit beta			51	51	51	34	46	47	38	45	38	42	40	38	94.8	54.32	110870000000	3036500000	11670000000	13456000000	14768000000	16684000000	11042000000	17828000000	15664000000	6719400000	3823000000	104710000	402430000	463980000	0.413688	0.811796	1.06237	3	0.762617	0.267095	509250000	575300000	380760000	0.973011	1.20441	0.888785	3	1.02207	0.133441	614750000
P161_RS0104150	P161_RS0104150	802	OmpA family protein			30	30	30	22	28	23	22	21	23	24	25	26	57.8	48.192	88891000000	5526000000	8266600000	11090000000	7945100000	6436600000	9103500000	13635000000	15925000000	10963000000	5926100000	368400000	551110000	739350000	1.45547	1.11172	1.69288	3	1.42002	0.238577	529670000	429110000	606900000	1.01203	0.898356	1.41665	3	1.10901	0.222429	909020000
P161_RS0104155	P161_RS0104155	803	glycine C-acetyltransferase			28	28	28	22	25	18	10	11	10	9	10	8	74.1	43.848	1855400000	434110000	528410000	184300000	102050000	87405000	78188000	152830000	228720000	59404000	88354000	20672000	25162000	8776300	0.0816708	0.0507577	0.0200949	3	0.0508411	0.0251383	4859700	4162100	3723300	0.00928531	0.00871349	0.00869108	3	0.00889663	0.000274992	7277600
P161_RS0104160	P161_RS0104160	804	UvrD-helicase domain-containing protein			19	19	19	13	11	9	5	3	2	5	1	1	22.6	120.88	141650000	22692000	31365000	28092000	10515000	7517200	4383500	23374000	8296600	5420000	2575500	412590	570270	510760	0.00163006	0.00115037	0.00116948	3	0.00131663	0.000221761	191180	136680	79700	0.000365283	0.000286144	0.000186039	3	0.000279155	7.33427e-05	424980
P161_RS0104170	P161_RS0104170	806	metal-dependent transcriptional regulator			9	9	9	4	9	1	2	0	0	0	1	0	41.3	24.391	91212000	3386500	86067000	845550	708670	0	0	0	204110	0	6515100	241890	6147600	60396	0.000955657	0.0124012	0.000138288	3	0.00449837	0.00559807	50619	0	0	9.67165e-05	0	0	1	0	0	0
P161_RS0104175	P161_RS0104175	807	TonB-dependent receptor	SusC-like		19	19	19	14	13	15	7	7	4	5	5	7	32.1	86.737	155920000	29728000	51050000	45531000	8856100	5854400	3892900	4706400	3467100	2836000	4585900	874340	1501500	1339100	0.00345434	0.00302888	0.00306611	3	0.00318311	0.000192388	260470	172190	114500	0.000497674	0.000360485	0.000267271	3	0.000375143	9.4631e-05	138420
P161_RS0104185	P161_RS0104185	809	hypothetical protein			4	4	4	2	2	3	3	3	3	3	0	3	18.7	20.929	54455000	2268200	3284400	5534400	3977200	2411300	2070700	18507000	0	16402000	6050600	252020	364940	614930	0.000995679	0.00073617	0.00140799	3	0.00104661	0.000276625	441910	267920	230080	0.000844347	0.000560899	0.000537062	3	0.000647436	0.000139576	2056300
P161_RS0104190	P161_RS0104190	810	transcription-repair coupling factor			31	31	31	21	27	25	2	6	3	3	3	4	29.2	128	237290000	40601000	97088000	56123000	712210	38375000	519860	1389200	1060000	1417200	4477100	766060	1831800	1058900	0.00302654	0.00369517	0.00242454	3	0.00304875	0.000518971	13438	724060	9808.6	2.56757e-05	0.00151584	2.28956e-05	3	0.000521472	0.000703128	26212
P161_RS0104215	P161_RS0104215	815	serine/threonine protein phosphatase			4	4	4	3	2	0	1	1	0	2	2	1	16.1	28.039	12100000	2744700	7194100	0	796230	174720	0	589060	439290	162160	864310	196050	513870	0	0.000774553	0.0010366	0	2	0.000905575	0.000440093	56874	12480	0	0.000108668	2.61273e-05	0	2	6.73975e-05	4.63132e-05	42076
P161_RS0104220	P161_RS0104220	816	hypothetical protein			14	14	14	9	10	12	8	7	7	2	2	4	34	53.234	172410000	12372000	28907000	47860000	46560000	22507000	10319000	954120	1873500	1053500	9578200	687310	1605900	2658900	0.00271542	0.00323948	0.00608803	3	0.00401431	0.00148187	2586700	1250400	573290	0.00494234	0.00261775	0.0013382	3	0.0029661	0.00149186	53007
P161_RS0104225	P161_RS0104225	817	universal stress protein			17	17	17	10	16	3	9	10	8	8	6	10	58.5	31.351	1509400000	228450000	412610000	787920	165750000	106460000	286370000	152790000	93367000	62859000	100630000	15230000	27508000	52528	0.0601706	0.0554901	0.000120272	3	0.0385937	0.0272718	11050000	7097200	19091000	0.021113	0.0148582	0.044563	3	0.0268447	0.0127863	10186000
P161_RS0104235	P161_RS0104235	819	NAD(P)/FAD-dependent oxidoreductase			6	6	6	2	3	3	1	3	2	2	3	3	14.9	52.142	14262000	2103300	5827500	973130	490690	625160	819200	0	2264700	1158200	475400	70110	194250	32438	0.00027699	0.000391848	7.42727e-05	3	0.000247704	0.000131293	16356	20839	27307	3.1251e-05	4.36271e-05	6.37411e-05	3	4.62064e-05	1.33888e-05	0
P161_RS0104250	P161_RS0104250	822	glycosyltransferase family 2 protein	CAZyme, single-domain, contains GT2 domain		5	5	5	3	4	0	2	0	0	2	3	1	22.6	25.978	14401000	3459000	8832800	0	271120	0	0	442240	1117300	278360	1309200	314450	802990	0	0.00124233	0.00161982	0	2	0.00143107	0.000691994	24647	0	0	4.70924e-05	0	0	1	0	0	40204
P161_RS0104255	P161_RS0104255	823	glycosyltransferase	CAZyme, single-domain, contains GT2 domain		8	8	8	4	6	6	1	1	1	4	3	3	15.9	57.725	113240000	19990000	39575000	28299000	447810	161920	112780	16539000	6466800	1651600	6661400	1175900	2327900	1664700	0.00464574	0.00469592	0.00381163	3	0.00438443	0.000405549	26341	9524.7	6634.3	5.03291e-05	1.99403e-05	1.54861e-05	3	2.85851e-05	1.54825e-05	972880
P161_RS0104265	P161_RS0104265	825	LacI family transcriptional regulator	OCS|LacI		16	16	16	10	10	7	6	5	5	5	6	3	54.7	37.773	1276100000	100230000	256210000	26135000	59117000	105340000	123710000	282760000	229090000	93495000	85072000	6682200	17080000	1742300	0.0264	0.0344544	0.00398931	3	0.0216146	0.0128894	3941100	7022500	8247300	0.00753016	0.0147018	0.0192512	3	0.0138277	0.00482484	18850000
P161_RS0104270	P161_RS0104270	826	Cof-type HAD-IIB family hydrolase			5	5	5	3	5	0	0	0	1	0	0	0	18.3	30.488	17401000	4111200	12459000	0	0	0	830150	0	0	0	1338500	316240	958400	0	0.0012494	0.00193332	0	2	0.00159136	0.000800449	0	0	63858	0	0	0.00014906	1	0	0	0
P161_RS0104275	P161_RS0104275	827	carbon-nitrogen hydrolase family protein			9	9	9	8	9	2	1	1	2	1	1	1	32.5	35.799	41131000	5303600	31939000	2031600	0	481950	392220	379000	485970	117690	2419400	311970	1878700	119500	0.00123253	0.00378978	0.000273617	3	0.00176531	0.00148408	0	28350	23072	0	5.93517e-05	5.38556e-05	2	5.66036e-05	2.67774e-05	22294
P161_RS0104280	P161_RS0104280	828	hypothetical protein			4	4	4	2	4	0	0	0	0	0	0	0	20.9	23.233	3205000	463510	2741500	0	0	0	0	0	0	0	291370	42138	249230	0	0.000166479	0.000502756	0	2	0.000334617	0.000209115	0	0	0	0	0	0	0	0	0	0
P161_RS0104285	P161_RS0104285	829	DUF2797 domain-containing protein			10	10	10	10	9	0	2	0	0	1	1	0	43.7	30.648	43545000	8307300	33166000	0	2071800	0	0	0	0	0	2721600	519200	2072900	0	0.00205125	0.00418153	0	2	0.00311639	0.0017072	129490	0	0	0.000247413	0	0	1	0	0	0
P161_RS0104290	P161_RS0104290	830	GH3 auxin-responsive promoter family protein			15	15	15	7	12	13	6	7	7	5	5	5	28.7	58.149	194150000	20615000	28022000	58495000	18097000	25424000	17529000	12964000	10437000	2569800	7467400	792890	1077800	2249800	0.00313254	0.00217418	0.00515132	3	0.00348601	0.00124085	696030	977830	674190	0.00132989	0.00204712	0.00157372	3	0.00165024	0.000297766	498600
P161_RS0104295	P161_RS0104295	831	hypothetical protein			20	20	20	14	11	13	11	12	8	13	14	9	27.3	73.355	211990000	26374000	33320000	22211000	19389000	32653000	6345700	21637000	39287000	10775000	5888600	732610	925550	616960	0.00289439	0.00186705	0.00141264	3	0.00205803	0.000619811	538580	907020	176270	0.00102905	0.00189888	0.000411457	3	0.00111313	0.00061014	601020
P161_RS0104300	P161_RS0104300	832	polyprenyl synthetase family protein			17	17	17	11	14	14	3	3	3	1	2	0	58.5	37.18	87560000	10222000	32066000	24467000	1336600	17300000	1598200	0	571170	0	4169500	486770	1526900	1165100	0.00192313	0.00308012	0.00266771	3	0.00255698	0.000478784	63646	823790	76104	0.000121607	0.00172463	0.000177645	3	0.000674628	0.000742817	0
P161_RS0104305	P161_RS0104305	833	DUF5615 family PIN-like protein			2	2	2	2	2	0	0	0	0	1	0	0	17.8	12.226	1820300	367160	1037500	0	0	0	0	415630	0	0	227530	45895	129690	0	0.000181322	0.000261615	0	2	0.000221469	0.000109426	0	0	0	0	0	0	0	0	0	51954
P161_RS0104315	P161_RS0104315	835	23S rRNA (adenine(2503)-C(2))-methyltransferase RlmN			13	13	13	10	10	10	4	3	4	3	3	2	41.4	39.35	104760000	10549000	30039000	42915000	5705700	3720100	3624500	2299700	5234800	675510	5820200	586050	1668800	2384200	0.00231536	0.00336636	0.00545906	3	0.00371359	0.00130668	316980	206670	201360	0.000605646	0.000432671	0.000470023	3	0.00050278	7.43186e-05	127760
P161_RS0104320	P161_RS0104320	836	tRNA preQ1(34) S-adenosylmethionine ribosyltransferase-isomerase QueA			29	29	29	22	25	20	12	10	14	10	11	10	65	39.77	4656700000	1045500000	1195000000	594830000	286290000	217900000	250790000	506780000	378360000	181240000	232840000	52276000	59750000	29741000	0.206532	0.12053	0.0680974	3	0.13172	0.0570667	14315000	10895000	12539000	0.0273513	0.022809	0.029269	3	0.0264765	0.00270886	25339000
P161_RS0104325	P161_RS0104325	837	3-phosphoshikimate 1-carboxyvinyltransferase			22	22	22	19	19	11	7	10	9	7	8	9	59.9	45.686	513600000	136250000	165690000	113350000	24182000	6436900	10305000	23405000	25195000	8775000	24457000	6488200	7890100	5397600	0.0256335	0.0159162	0.0123588	3	0.0179695	0.00561052	1151500	306520	490720	0.00220014	0.00064171	0.00114546	3	0.0013291	0.000649344	1114500
P161_RS0104330	P161_RS0104330	838	glycosyl hydrolase	CAZyme, multi-domain, contains four GH74 domains		57	57	57	44	45	46	34	37	34	39	36	40	58.5	115.77	8623200000	263460000	460180000	639830000	609230000	1850900000	562370000	1239100000	1559200000	1438900000	187460000	5727300	10004000	13909000	0.0226274	0.0201804	0.0318472	3	0.024885	0.00502333	13244000	40236000	12225000	0.025305	0.0842354	0.0285361	3	0.0460255	0.0270507	26938000
P161_RS0104350	P161_RS0104350	842	phosphatase PAP2 family protein			5	5	5	3	5	0	1	1	1	1	1	0	20.6	32.444	24531000	3938500	16451000	0	214000	985690	1255800	1288000	398760	0	1887000	302960	1265400	0	0.00119693	0.00255261	0	2	0.00187477	0.00104277	16462	75822	96602	3.14535e-05	0.000158736	0.000225492	3	0.000138561	8.04903e-05	99075
P161_RS0104355	P161_RS0104355	843	hypothetical protein			2	2	2	1	0	1	0	0	0	0	0	0	13.9	20.033	1103200	628470	0	474720	0	0	0	0	0	0	157600	89781	0	67817	0.000354706	0	0.000155279	2	0.000254993	0.000145182	0	0	0	0	0	0	0	0	0	0
P161_RS0104365	P161_RS0104365	845	alpha/beta fold hydrolase	*		8	8	8	7	7	0	2	2	0	2	2	1	37.4	29.6	261700000	51799000	112500000	0	14006000	1105200	0	32545000	49577000	168150	20131000	3984600	8653600	0	0.0157423	0.0174564	0	2	0.0165993	0.00785623	1077400	85013	0	0.00205856	0.000177978	0	2	0.00111827	0.000931304	2503500
P161_RS0104370	P161_RS0104370	846	pyridoxine 5'-phosphate synthase			10	10	10	8	9	3	8	7	5	8	9	6	57.8	26.5	1912700000	97875000	610590000	7431800	156100000	80744000	113860000	378950000	264190000	202990000	173880000	8897700	55508000	675620	0.035153	0.111973	0.00154695	3	0.0495576	0.0462175	14191000	7340300	10351000	0.0271144	0.0153672	0.0241617	3	0.0222144	0.00498954	34450000
P161_RS0104375	P161_RS0104375	847	CBS domain-containing protein			8	8	8	4	7	0	1	0	0	0	0	0	34.2	25.43	15982000	3576800	12406000	0	0	0	0	0	0	0	1141600	255480	886110	0	0.00100935	0.00178749	0	2	0.00139842	0.000731773	0	0	0	0	0	0	0	0	0	0
P161_RS0104380	P161_RS0104380	848	NAD kinase			13	13	13	7	10	1	5	1	3	5	5	6	42.5	33.372	496260000	7665400	23094000	54394	114990000	996840	37706000	127920000	94038000	89792000	31016000	479090	1443400	3399.6	0.00189279	0.00291168	7.784e-06	3	0.00160408	0.00120296	7187200	62302	2356600	0.0137324	0.000130431	0.00550087	3	0.00645457	0.00559378	7995000
P161_RS0104385	P161_RS0104385	849	hypothetical protein			5	5	5	3	4	4	3	2	2	1	0	1	31.6	25.529	568980000	30025000	103820000	5350500	191980000	99667000	105230000	4157200	0	28753000	94830000	5004100	17303000	891750	0.0197702	0.0349042	0.00204182	3	0.0189054	0.01343	31996000	16611000	17538000	0.061134	0.0347757	0.0409379	3	0.0456159	0.0112577	692870
P161_RS0104390	P161_RS0104390	850	isoprenyl transferase			8	8	8	5	6	1	5	3	1	3	3	4	29.6	28.456	273620000	28461000	73943000	358700	34753000	2097900	60055000	5381600	3298400	65272000	19544000	2032900	5281600	25621	0.00803157	0.0106542	5.86639e-05	3	0.00624816	0.0045057	2482300	149850	4289600	0.00474287	0.000313716	0.010013	3	0.00502318	0.00396466	384400
P161_RS0104395	P161_RS0104395	851	outer membrane protein assembly factor BamA			42	42	42	33	33	29	16	16	16	18	15	15	59.6	94.66	3613800000	283830000	444650000	447520000	584150000	461370000	388620000	297220000	393940000	312530000	92662000	7277600	11401000	11475000	0.0287523	0.0229985	0.0262741	3	0.0260083	0.00235648	14978000	11830000	9964600	0.0286181	0.0247665	0.0232598	3	0.0255481	0.00225627	7621000
P161_RS0104400	P161_RS0104400	852	OmpH family outer membrane protein			15	15	15	14	12	12	4	7	5	4	3	3	46.7	33.603	1745000000	102290000	219470000	247690000	245500000	309550000	195090000	177370000	146980000	101100000	124650000	7306500	15676000	17692000	0.0288665	0.0316222	0.040509	3	0.0336659	0.00496789	17535000	22111000	13935000	0.0335037	0.0462901	0.0325276	3	0.0374405	0.00627031	12669000
P161_RS0104405	P161_RS0104405	853	OmpH family outer membrane protein			34	34	34	24	33	20	18	18	15	16	9	21	82.1	18.812	6033000000	888570000	1208900000	605000000	706770000	451320000	372610000	547930000	13181000	1238800000	548460000	80779000	109900000	55000000	0.319141	0.221694	0.125932	3	0.222256	0.0788781	64252000	41029000	33873000	0.122765	0.0858956	0.0790677	3	0.0959093	0.0191931	49812000
P161_RS0104410	P161_RS0104410	854	glutamate racemase			12	12	12	8	9	0	1	2	0	1	1	2	51.1	29.3	56866000	10548000	25947000	0	656060	785400	0	278990	628230	18021000	3791000	703220	1729800	0	0.00277828	0.00348942	0	2	0.00313385	0.00150557	43737	52360	0	8.35672e-05	0.000109617	0	2	9.65923e-05	4.67595e-05	18599
P161_RS0104415	P161_RS0104415	855	type IX secretion system membrane protein PorP/SprF			5	5	5	4	5	2	3	3	4	3	4	2	15.3	36.708	248650000	16928000	49351000	36376000	18705000	16863000	46479000	17252000	24092000	22606000	20721000	1410700	4112600	3031300	0.00557338	0.00829609	0.00694071	3	0.00693673	0.00111154	1558700	1405300	3873300	0.00297817	0.00294204	0.00904121	3	0.00498714	0.0028667	1437700
P161_RS0104420	P161_RS0104420	856	PKD domain-containing protein	*		13	13	13	12	11	11	10	9	9	9	9	10	7.8	245.97	685680000	16730000	43063000	88428000	97354000	84739000	76664000	100430000	95367000	82907000	25396000	619630	1594900	3275100	0.00244803	0.00321729	0.00749893	3	0.00438808	0.00222201	3605700	3138500	2839400	0.00688932	0.00657055	0.00662784	3	0.00669591	0.000138751	3719700
P161_RS18035	P161_RS18035	857	type IX secretion system membrane protein PorP/SprF			2	2	2	2	2	0	0	0	0	0	0	0	8.4	38.014	12972000	746000	12226000	0	0	0	0	0	0	0	1621600	93250	1528300	0	0.000368411	0.00308294	0	2	0.00172568	0.00137473	0	0	0	0	0	0	0	0	0	0
P161_RS0104430	P161_RS0104430	858	hypothetical protein			2	2	2	1	2	2	0	1	0	1	0	1	10.7	17.812	13078000	5037400	2170900	3237000	0	1838000	0	461650	0	333070	1634800	629670	271370	404630	0.0024877	0.000547417	0.000926473	3	0.00132053	0.000839694	0	229740	0	0	0.000480968	0	1	0	0	57706
P161_RS0104435	P161_RS0104435	859	DUF4837 family protein			28	28	28	20	23	25	19	20	20	18	17	15	77.7	36.749	27624000000	727150000	1982800000	2678700000	3522100000	4651800000	3216900000	4565100000	3939600000	2339900000	1973200000	51939000	141630000	191340000	0.2052	0.285701	0.438107	3	0.30967	0.0965826	251580000	332270000	229780000	0.480688	0.695618	0.536362	3	0.570889	0.0910784	326080000
P161_RS0104440	P161_RS0104440	860	lytic transglycosylase domain-containing protein	CAZyme, multi-domain, contains a GH23 and a CBM50 domain		10	10	10	7	9	7	3	4	2	3	3	4	24.3	50.101	143240000	9153400	55403000	35824000	21218000	13092000	1163800	4456100	1623900	1303600	5968200	381390	2308500	1492700	0.00150679	0.00465679	0.00341781	3	0.0031938	0.0012957	884080	545480	48494	0.00168919	0.00114198	0.000113197	3	0.000981456	0.000653332	185670
P161_RS0104445	P161_RS0104445	861	exodeoxyribonuclease III			11	11	11	9	10	1	7	5	3	5	5	4	53.4	29.35	747890000	104410000	220010000	6311800	111330000	3148000	3047700	97370000	103190000	99069000	53421000	7457600	15715000	450840	0.0294634	0.0317009	0.00103228	3	0.0207322	0.0139599	7952300	224860	217690	0.0151943	0.000470752	0.000508141	3	0.00539105	0.00693193	6955000
P161_RS0104460	P161_RS0104460	863	CoA transferase subunit B			7	7	7	4	6	0	6	2	2	5	4	3	40.6	23.449	1807100000	17129000	271680000	0	193410000	23791000	346050000	519700000	232440000	202890000	225890000	2141200	33960000	0	0.00845944	0.0685053	0	2	0.0384824	0.030496	24177000	2973900	43256000	0.0461944	0.00622596	0.10097	3	0.0511301	0.0388362	64963000
P161_RS0104465	P161_RS0104465	864	CoA transferase subunit A			15	15	15	10	14	4	9	8	6	7	8	7	70	25.633	2448900000	269570000	606740000	13322000	358650000	158620000	105770000	367530000	384180000	184480000	272100000	29953000	67416000	1480200	0.118338	0.135994	0.00338919	3	0.0859071	0.0587925	39851000	17624000	11752000	0.0761423	0.0368964	0.027432	3	0.0468236	0.0210885	40836000
P161_RS0104470	P161_RS0104470	865	penicillin-binding protein	CAZyme, single-domain, contains GT51 domain		31	31	31	28	25	22	16	12	12	15	12	12	50.6	84.729	1311400000	102440000	233240000	173460000	234100000	84677000	219610000	114380000	69693000	79826000	36428000	2845600	6478900	4818200	0.0112424	0.0130695	0.0110321	3	0.0117813	0.00091489	6502800	2352100	6100300	0.0124247	0.0049242	0.0142396	3	0.0105295	0.0040322	3177100
P161_RS0104480	P161_RS0104480	867	hypothetical protein			10	10	10	4	6	8	5	6	8	5	5	6	18.4	54.775	84236000	8234100	22535000	15027000	11109000	7127100	6710900	4886600	5462000	3143600	3369400	329360	901420	601080	0.00130123	0.00181838	0.00137628	3	0.00149863	0.000228162	444370	285090	268440	0.000849047	0.000596845	0.000626603	3	0.000690832	0.000112533	195470
P161_RS18980	P161_RS18980	870	response regulator transcription factor	RR|LytTR		2	2	2	0	2	0	0	0	0	0	0	0	9.2	25.865	861530	0	861530	0	0	0	0	0	0	0	66272	0	66272	0	0	0.000133686	0	1	0	0	0	0	0	0	0	0	0	0	0	0
P161_RS0104500	P161_RS0104500	871	sensor histidine kinase	HK|Classic		4	4	4	3	2	0	0	0	0	0	1	0	10.7	66.498	1714200	965200	512660	0	0	0	0	0	236330	0	57140	32173	17089	0	0.000127109	3.44726e-05	0	2	8.07907e-05	5.36724e-05	0	0	0	0	0	0	0	0	0	0
P161_RS0104510	P161_RS0104510	873	hypothetical protein			20	20	20	19	19	16	11	13	13	9	10	11	68.9	39.762	22774000000	2776500000	4472700000	6176100000	2258100000	946770000	1479900000	1558900000	1725900000	1378700000	1751800000	213580000	344050000	475080000	0.84381	0.69403	1.08778	3	0.875207	0.162274	173700000	72829000	113840000	0.331884	0.15247	0.26573	3	0.250028	0.0740823	119920000
P161_RS0104515	P161_RS0104515	874	TonB-dependent receptor	SusC-like		47	47	47	40	42	40	17	18	20	19	18	14	63.6	100.46	3477600000	558790000	915300000	771860000	203560000	320210000	236810000	188720000	188930000	93434000	77280000	12417000	20340000	17152000	0.049057	0.0410306	0.0392726	3	0.0431201	0.00425895	4523600	7115800	5262500	0.00864313	0.0148972	0.0122839	3	0.0119414	0.00256466	4193700
P161_RS0104520	P161_RS0104520	875	porin			10	10	10	5	4	2	2	2	3	3	5	3	29.4	45.27	22531000	2889300	7880100	1172500	1526200	670060	873010	1884800	4663400	971450	901240	115570	315210	46902	0.000456593	0.000635853	0.000107391	3	0.000399946	0.000219431	61048	26802	34921	0.000116643	5.61109e-05	8.1514e-05	3	8.47559e-05	2.48182e-05	75390
P161_RS0104525	P161_RS0104525	876	phosphate:sodium symporter			20	20	20	17	14	13	5	4	5	4	3	4	26.3	82.729	449800000	102020000	95476000	91172000	37409000	3870300	95504000	9911500	7902700	6541800	15510000	3517800	3292300	3143900	0.0138981	0.00664135	0.00719853	3	0.00924599	0.00329739	1290000	133460	3293300	0.00246477	0.000279403	0.00768735	3	0.00347718	0.00310786	341770
P161_RS0104530	P161_RS0104530	877	patatin			11	11	11	6	7	8	3	2	0	1	2	4	18.4	83.159	43733000	6554800	11540000	10951000	2251400	1247200	0	10154000	209610	824680	1286300	192790	339400	322100	0.000761673	0.00068465	0.000737506	3	0.000727943	3.21635e-05	66218	36683	0	0.000126521	7.67971e-05	0	2	0.000101659	5.20447e-05	298660
P161_RS0104535	P161_RS0104535	878	excinuclease ABC subunit UvrC			13	13	13	8	7	7	4	3	1	3	4	2	25.8	69.792	309910000	4031700	6414400	6421600	4069000	2587500	669070	1631700	283620000	464090	9684800	125990	200450	200680	0.00049776	0.000404355	0.000459493	3	0.00045387	3.83393e-05	127160	80859	20908	0.000242961	0.000169281	4.88043e-05	3	0.000153682	8.00281e-05	50992
P161_RS0104540	P161_RS0104540	879	DUF4230 domain-containing protein			7	7	7	5	1	1	2	1	1	2	2	2	36.8	23.647	33149000	4391900	1526200	817000	251480	1024100	1763100	13139000	645540	9590400	2367800	313710	109020	58357	0.0012394	0.000219919	0.000133619	3	0.00053098	0.000502168	17963	73154	125940	3.43215e-05	0.00015315	0.000293974	3	0.000160482	0.000106129	938510
P161_RS0104550	P161_RS0104550	881	glycine--tRNA ligase			36	36	36	22	31	30	15	17	16	14	12	14	61.2	59.238	4626900000	98529000	601060000	655210000	374420000	871960000	417930000	691230000	681280000	235270000	154230000	3284300	20035000	21840000	0.0129756	0.0404153	0.0500066	3	0.0344658	0.0156923	12481000	29065000	13931000	0.0238471	0.0608485	0.0325183	3	0.0390713	0.0158005	23041000
P161_RS0104565	P161_RS0104565	884	Ig-like domain-containing protein			12	12	12	9	8	9	6	7	5	6	6	7	21.7	61.886	288930000	24572000	50229000	66496000	14259000	45747000	6125200	41841000	11065000	28597000	8025800	682540	1395200	1847100	0.00269657	0.00281445	0.00422927	3	0.00324676	0.000696401	396080	1270800	170140	0.00075678	0.00266046	0.000397148	3	0.00127146	0.000993083	1162300
P161_RS0104570	P161_RS0104570	885	cystathionine gamma-synthase			10	10	10	9	9	8	4	3	5	4	5	3	30.6	41.934	97407000	24255000	38933000	10395000	5384000	1880100	3695300	4755900	6115800	1994300	6957700	1732500	2780900	742470	0.00684475	0.00560973	0.00170002	3	0.00471817	0.0021929	384570	134290	263950	0.000734788	0.000281141	0.000616123	3	0.000544017	0.000192091	339700
P161_RS0104580	P161_RS0104580	886	DinB family protein			5	5	5	4	5	3	2	2	1	3	3	2	29.1	17.393	1511500000	91176000	176110000	276190000	218530000	156150000	15465000	65644000	423180000	89077000	302300000	18235000	35222000	55238000	0.0720427	0.0710511	0.126477	3	0.0898571	0.0258976	43706000	31229000	3093000	0.083508	0.0653789	0.00721981	3	0.0520356	0.0325423	13129000
P161_RS0104585	P161_RS0104585	887	arsenate reductase			5	5	5	4	3	1	0	0	0	1	0	1	41.7	13.577	11456000	6085700	4792200	578230	0	0	0	0	0	0	1432000	760710	599030	72279	0.00300541	0.00120839	0.000165496	3	0.00145976	0.00117294	0	0	0	0	0	0	0	0	0	0
P161_RS0104590	P161_RS0104590	888	DUF4252 domain-containing protein			3	3	3	1	1	1	0	0	0	0	0	1	22	18.209	1910000	837310	590120	341860	0	0	0	0	0	140750	477510	209330	147530	85465	0.000827019	0.000297603	0.000195688	3	0.000440103	0.000276737	0	0	0	0	0	0	0	0	0	0
P161_RS0104595	P161_RS0104595	889	hypothetical protein			5	5	5	1	2	3	4	4	3	4	0	4	29.9	16.887	449550000	2852700	72228000	59582000	103510000	55988000	33357000	7126000	0	114900000	64221000	407530	10318000	8511800	0.00161007	0.0208138	0.0194893	3	0.0139711	0.00875726	14787000	7998200	4765300	0.0282532	0.0167445	0.0111234	3	0.018707	0.00712957	1018000
P161_RS0104610	P161_RS0104610	892	glycosyltransferase family 4 protein	CAZyme, single-domain, contains GT4 domain		9	9	9	4	6	6	3	3	4	3	3	1	26.3	36.971	45014000	1586800	8615100	6662400	2226200	1655200	1789400	1741300	20495000	242830	2369200	83515	453420	350650	0.00032995	0.000914655	0.000802876	3	0.000682494	0.000253428	117170	87115	94180	0.000223874	0.000182378	0.000219839	3	0.000208697	1.86829e-05	91646
P161_RS0104615	P161_RS0104615	893	hypothetical protein			9	9	9	5	6	6	4	3	2	5	4	3	26.3	35.105	79793000	7126000	15382000	10847000	3847100	1771700	1033500	36353000	1729400	1704000	4987100	445370	961390	677940	0.00175956	0.00193935	0.00155227	3	0.00175039	0.00015816	240440	110730	64596	0.000459403	0.000231817	0.000150783	3	0.000280667	0.000130643	2272000
P161_RS18050	P161_RS18050	894	thymidine kinase			4	4	4	0	2	1	1	1	1	1	1	2	19.6	25.102	10858000	0	5235900	566520	1540200	273700	181120	1091800	1416600	552220	987090	0	475990	51502	0	0.000960184	0.000117923	2	0.000539054	0.000427559	140020	24882	16465	0.000267533	5.20913e-05	3.84333e-05	3	0.000119352	0.000104928	99250
P161_RS0104625	P161_RS0104625	895	alanine racemase			6	6	6	2	4	3	2	3	3	1	1	0	17.2	41.328	12372000	1616100	4189500	3560600	1218900	839150	684250	0	263100	0	824770	107740	279300	237370	0.000425658	0.000563414	0.000543501	3	0.000510858	6.07912e-05	81262	55943	45617	0.000155265	0.000117119	0.000106481	3	0.000126288	2.0945e-05	0
P161_RS0104630	P161_RS0104630	896	large-conductance mechanosensitive channel protein MscL			6	6	6	4	3	2	4	4	4	3	0	4	34.1	14.765	6036600000	423660000	1007300000	564030000	1030800000	822060000	711060000	808220000	0	669560000	2012200000	141220000	335760000	188010000	0.557931	0.677307	0.430483	3	0.55524	0.100784	343590000	274020000	237020000	0.656489	0.57367	0.553262	3	0.594474	0.044636	269410000
P161_RS0104650	P161_RS0104650	899	hypothetical protein			9	9	9	7	7	1	5	4	5	4	4	3	38.7	29.675	106520000	18527000	27541000	30300000	3301500	2601200	2388500	6764400	4084200	11011000	7101300	1235200	1836100	2020000	0.00488002	0.00370385	0.00462515	3	0.00440301	0.000505211	220100	173410	159230	0.00042054	0.00036304	0.000371681	3	0.000385087	2.5316e-05	450960
P161_RS0104665	P161_RS0104665	901	cystathionine beta-synthase			37	37	37	31	33	32	18	19	18	15	17	16	61.1	69.207	2437700000	298650000	330800000	593390000	347230000	331500000	290210000	157730000	66899000	21337000	69650000	8532700	9451400	16954000	0.0337109	0.0190657	0.0388192	3	0.030532	0.00837178	9920800	9471300	8291900	0.0189554	0.0198285	0.0193553	3	0.0193797	0.000356841	4506500
P161_RS0104670	P161_RS0104670	902	hypothetical protein			2	2	2	1	1	0	1	0	0	0	0	0	24	14.034	5811600	859370	947770	0	4004500	0	0	0	0	0	830230	122770	135400	0	0.000485039	0.000273134	0	2	0.000379086	0.000198541	572070	0	0	0.00109304	0	0	1	0	0	0
P161_RS0104675	P161_RS0104675	903	DEAD/DEAH box helicase			18	18	18	11	12	12	7	12	10	9	11	10	44.5	51.517	513280000	15477000	51865000	46285000	43423000	77489000	39988000	111950000	74948000	51855000	21387000	644860	2161000	1928500	0.00254771	0.00435925	0.00441565	3	0.0037742	0.000867567	1809300	3228700	1666200	0.00345698	0.00675939	0.00388931	3	0.0047019	0.00146554	4664700
P161_RS0104680	P161_RS0104680	904	TatD family hydrolase			9	9	9	5	6	0	2	1	0	2	4	1	43.3	29.457	19313000	2383400	10603000	0	452910	0	0	959450	4812500	102250	1207100	148960	662680	0	0.00058851	0.00133678	0	2	0.000962646	0.000547037	28307	0	0	5.40855e-05	0	0	1	0	0	59966
P161_RS0104685	P161_RS0104685	905	hypothetical protein			10	10	10	6	7	2	3	2	2	2	2	3	28.8	42.149	89909000	13456000	33054000	6281900	9426900	4971900	7762000	760680	10442000	3754000	4994900	747570	1836300	349000	0.00295349	0.00370425	0.000799099	3	0.00248561	0.0012313	523720	276220	431220	0.00100066	0.000578276	0.00100657	3	0.000861835	0.000200521	42260
P161_RS0104695	P161_RS0104695	907	hypothetical protein			16	16	16	4	12	9	0	0	1	1	2	2	16.6	129.94	23734000	2072400	12372000	7333300	0	0	0	0	655790	1299900	402270	35126	209700	124290	0.000138776	0.000423014	0.000284584	3	0.000282125	0.000116053	0	0	0	0	0	0	0	0	0	0
P161_RS0104705	P161_RS0104705	909	CusA/CzcA family heavy metal efflux RND transporter			8	8	8	3	4	3	2	1	1	0	0	0	6.3	160.28	60096000	1945900	6498000	729660	21773000	20040000	9108400	0	0	0	910540	29484	98454	11055	0.000116485	0.000198605	2.53124e-05	3	0.000113468	7.07786e-05	329900	303640	138010	0.000630332	0.00063568	0.000322148	3	0.000529387	0.000146556	0
P161_RS0104710	P161_RS0104710	910	efflux RND transporter periplasmic adaptor subunit			6	6	6	4	3	3	1	0	3	1	3	3	18.3	42.321	27286000	2514300	5538000	2432200	3457000	0	2578900	8329700	952320	1483300	1364300	125720	276900	121610	0.000496694	0.000558573	0.000278448	3	0.000444571	0.000120153	172850	0	128950	0.00033026	0	0.000301	2	0.00031563	0.000149268	416480
P161_RS0104715	P161_RS0104715	911	DUF3575 domain-containing protein			10	10	10	6	7	8	8	8	8	7	1	9	77.7	21.486	7480500000	95101000	147210000	855890000	1358500000	1573300000	709300000	1136600000	418640	1604200000	680050000	8645500	13383000	77808000	0.0341566	0.0269967	0.178155	3	0.0797696	0.0696307	123500000	143020000	64482000	0.235968	0.299417	0.150516	3	0.228634	0.0610093	103330000
P161_RS0104720	P161_RS0104720	912	DUF3575 domain-containing protein			7	7	7	5	6	5	5	5	5	4	0	6	40.4	18.513	2463100000	45247000	66213000	188510000	477320000	360380000	283170000	387580000	0	654640000	273670000	5027400	7357000	20946000	0.0198622	0.0148408	0.0479596	3	0.0275542	0.0145737	53036000	40042000	31463000	0.101335	0.0838293	0.0734422	3	0.086202	0.01151	43064000
P161_RS0104725	P161_RS0104725	913	aminoacyl-tRNA hydrolase			2	2	2	1	2	1	0	1	0	0	0	0	9.7	15.372	2321200	1165100	646270	509820	0	0	0	0	0	0	580300	291280	161570	127460	0.00115079	0.000325925	0.000291843	3	0.000589518	0.000397121	0	0	0	0	0	0	0	0	0	0
P161_RS0104730	P161_RS0104730	914	BamA/TamA family outer membrane protein			10	10	10	8	7	7	2	3	3	3	7	5	33.6	45.487	1100100000	32828000	48814000	90765000	78263000	114110000	38269000	70041000	567190000	59827000	64712000	1931100	2871400	5339100	0.00762938	0.00579229	0.0122248	3	0.00854883	0.00270536	4603700	6712600	2251100	0.00879618	0.0140531	0.00525461	3	0.00936795	0.00361463	4120100
P161_RS0104735	P161_RS0104735	915	TonB-dependent receptor	SusC-like		30	30	30	21	24	28	6	9	9	3	7	6	51	87.152	1266900000	136730000	333470000	477530000	45544000	97863000	110180000	3955000	51780000	9843300	38391000	4143400	10105000	14471000	0.0163697	0.0203842	0.033134	3	0.023296	0.00714697	1380100	2965500	3338800	0.00263692	0.00620837	0.00779356	3	0.00554629	0.00215662	119850
P161_RS0104755	P161_RS0104755	919	lysophospholipid acyltransferase family protein			23	23	23	17	20	14	8	5	5	1	3	4	39.8	69.297	241650000	46183000	80618000	65298000	25969000	15855000	2444500	325380	2515900	2444500	6531200	1248200	2178900	1764800	0.00493138	0.00439536	0.00404083	3	0.00445585	0.000366074	701860	428520	66067	0.00134103	0.000897121	0.000154216	3	0.000797455	0.000489612	8794.1
P161_RS0104760	P161_RS0104760	920	aspartate kinase			21	21	21	13	10	9	7	6	7	5	9	8	49.9	47.421	433930000	22931000	42402000	88967000	11094000	15481000	29153000	28825000	143490000	51587000	16690000	881950	1630800	3421800	0.0034844	0.00328971	0.00783483	3	0.00486965	0.00209821	426680	595410	1121300	0.000815247	0.00124651	0.00261738	3	0.00155971	0.00076833	1108700
P161_RS0104765	P161_RS0104765	921	GNAT family N-acetyltransferase			7	7	7	5	5	3	2	2	2	1	0	1	51.3	18.099	28059000	9266700	7649800	4107300	1446000	1687000	3117800	418500	0	365590	2805900	926670	764980	410730	0.00366108	0.00154315	0.00094044	3	0.00204822	0.0011667	144600	168700	311780	0.000276284	0.000353179	0.000727769	3	0.000452411	0.000197222	41850
P161_RS0104770	P161_RS0104770	922	class 1 fructose-bisphosphatase			22	22	22	17	17	20	15	14	14	13	11	12	72.6	37.365	3686000000	160960000	337670000	389040000	641330000	737360000	591120000	379190000	320660000	128660000	230370000	10060000	21105000	24315000	0.039745	0.0425738	0.0556736	3	0.0459974	0.00693884	40083000	46085000	36945000	0.0765856	0.0964805	0.0862385	3	0.0864349	0.00812324	23699000
P161_RS0104775	P161_RS0104775	923	superoxide dismutase			14	14	14	13	13	10	11	10	11	9	11	10	62.9	22.452	22974000000	2531200000	2913000000	2324100000	2558800000	2040600000	1407000000	2623300000	4174400000	2401800000	1914500000	210930000	242750000	193670000	0.833341	0.489684	0.443442	3	0.588822	0.173928	213230000	170050000	117250000	0.407413	0.356005	0.27369	3	0.345703	0.0550764	218610000
P161_RS0104790	P161_RS0104790	926	response regulator transcription factor	RR|NarL		6	6	5	1	4	0	2	1	1	0	0	0	32.1	24.429	4535600	0	2725200	0	1679100	131280	0	0	0	0	412320	0	247750	0	0	0.00049977	0	1	0	0	152640	11934	0	0.000291645	2.49842e-05	0	2	0.000158315	0.000131989	0
P161_RS0104795	P161_RS0104795	927	hypothetical protein	HK|Classic		21	21	21	13	12	12	9	10	8	10	11	12	29.8	73.552	439760000	14893000	45899000	57253000	41230000	79513000	74394000	29903000	34295000	62380000	12565000	425520	1311400	1635800	0.00168114	0.0026454	0.00374546	3	0.00269067	0.000843362	1178000	2271800	2125600	0.00225078	0.00475609	0.00496166	3	0.00398951	0.00123233	854380
P161_RS0104800	P161_RS0104800	928	hypothetical protein			26	26	26	17	19	18	13	12	14	11	13	14	40.3	71.736	936140000	44938000	102570000	161830000	103210000	114100000	169560000	51491000	68574000	119860000	26747000	1283900	2930600	4623800	0.00507242	0.00591171	0.010587	3	0.00719039	0.0024261	2948800	3260000	4844500	0.0056342	0.00682492	0.0113082	3	0.00792245	0.00244296	1471200
P161_RS0104805	P161_RS0104805	929	sugar kinase			22	22	22	15	20	5	16	12	11	14	12	13	77.6	33.827	3185400000	253210000	550100000	14371000	587000000	161970000	331180000	541160000	340210000	406170000	245030000	19478000	42315000	1105500	0.0769535	0.0853594	0.00253124	3	0.054948	0.0372228	45154000	12459000	25475000	0.0862746	0.0260833	0.0594648	3	0.0572742	0.0246218	41627000
P161_RS0104810	P161_RS0104810	930	SufE family protein			7	7	7	7	6	3	5	5	4	2	1	5	42.6	16.198	147430000	12153000	14673000	5187800	45913000	27305000	24258000	4578300	1840800	11517000	12285000	1012800	1222700	432320	0.00400136	0.00246647	0.000989875	3	0.0024859	0.00122951	3826100	2275400	2021500	0.00731043	0.00476363	0.00471867	3	0.00559758	0.00121131	381530
P161_RS0104820	P161_RS0104820	932	DUF2480 family protein			4	4	4	4	2	0	0	0	0	0	0	0	28.4	19.379	13994000	7798200	6195800	0	0	0	0	0	0	0	1999100	1114000	885110	0	0.00440118	0.00178548	0	2	0.00309333	0.0018074	0	0	0	0	0	0	0	0	0	0
P161_RS0104825	P161_RS0104825	933	DUF3078 domain-containing protein			7	7	7	5	7	1	1	1	1	2	2	1	23.8	31.329	64978000	9973200	37782000	2686300	3095700	1228600	504830	1628600	6424300	1655400	4998300	767170	2906300	206640	0.00303093	0.00586269	0.00047314	3	0.00312225	0.00220122	238130	94506	38833	0.000454989	0.000197851	9.06456e-05	3	0.000247829	0.000152883	125280
P161_RS0104830	P161_RS0104830	934	DUF3078 domain-containing protein			13	13	13	11	11	2	9	6	6	9	10	9	45.5	34.491	1833200000	58698000	162130000	4654300	235690000	110060000	459950000	228290000	288830000	284890000	130940000	4192700	11581000	332450	0.0165645	0.0233616	0.000761204	3	0.0135624	0.00946762	16835000	7861700	32854000	0.0321662	0.0164587	0.0766891	3	0.0417714	0.0255097	16306000
P161_RS0104835	P161_RS0104835	935	DUF21 domain-containing protein			12	12	12	9	11	9	3	3	3	4	4	1	33.7	41.201	334540000	38445000	109770000	140440000	2205800	1768600	1579400	27278000	12798000	260210	20909000	2402800	6860400	8777700	0.00949296	0.013839	0.0200981	3	0.0144767	0.00435296	137860	110540	98713	0.000263406	0.000231419	0.00023042	3	0.000241748	1.53196e-05	1704900
P161_RS0104840	P161_RS0104840	936	GTPase HflX			17	17	17	12	15	11	7	6	8	10	8	8	43.5	46.725	1147800000	89800000	439820000	158250000	139950000	15953000	115340000	38407000	114610000	35633000	52172000	4081800	19992000	7193300	0.0161263	0.0403286	0.0164704	3	0.0243084	0.0113288	6361500	725140	5242900	0.0121548	0.0015181	0.0122382	3	0.00863702	0.00503395	1745800
P161_RS0104845	P161_RS0104845	937	carbonic anhydrase			14	14	14	8	12	1	9	7	7	5	8	5	61	27.198	408120000	45109000	248120000	2829100	12510000	33603000	21506000	12191000	19219000	13035000	29151000	3222100	17723000	202080	0.0127298	0.0357515	0.000462699	3	0.0163147	0.0146279	893540	2400200	1536200	0.00170726	0.0050249	0.00358586	3	0.00343934	0.00135838	870770
P161_RS0104850	P161_RS0104850	938	DUF2490 domain-containing protein			2	2	2	2	2	0	1	0	0	0	0	0	7.8	27.108	7598600	1335600	6087000	0	176050	0	0	0	0	0	633220	111300	507250	0	0.000439723	0.00102324	0	2	0.000731483	0.00041911	14671	0	0	2.80315e-05	0	0	1	0	0	0
P161_RS0104865	P161_RS0104865	941	glycerophosphodiester phosphodiesterase			7	7	7	6	6	0	0	3	0	2	2	4	22.3	37.53	34714000	7724900	23885000	0	0	727440	0	1107300	514930	755250	2042000	454410	1405000	0	0.00179528	0.00283422	0	2	0.00231475	0.00117072	0	42791	0	0	8.95844e-05	0	1	0	0	65137
P161_RS0104870	P161_RS0104870	942	hypothetical protein			3	3	3	2	2	0	0	0	0	0	0	0	14.3	24.341	1673000	483000	1190000	0	0	0	0	0	0	0	185890	53667	132220	0	0.000212027	0.000266719	0	2	0.000239373	0.000115029	0	0	0	0	0	0	0	0	0	0
P161_RS0104880	P161_RS0104880	944	hypothetical protein			5	5	5	4	5	2	2	1	0	1	1	1	25.2	25.317	66354000	8345000	33744000	19879000	1764400	2171700	0	449380	0	0	5104100	641930	2595700	1529200	0.00253613	0.00523614	0.00350138	3	0.00375788	0.0011171	135720	167060	0	0.000259317	0.000349746	0	2	0.000304531	0.000148228	34568
P161_RS0104895	P161_RS0104895	947	hypothetical protein			3	3	3	1	3	0	0	1	0	0	1	0	13.8	23.688	2921400	611080	2310300	0	0	0	0	0	0	0	265580	55553	210030	0	0.000219478	0.00042368	0	2	0.000321579	0.000173004	0	0	0	0	0	0	0	0	0	0
P161_RS0104900	P161_RS0104900	948	N-6 DNA methylase			31	31	31	21	23	18	9	6	6	11	9	10	34.3	117.03	573100000	24859000	82190000	117590000	6866500	253550000	31998000	21161000	5152000	29731000	8954700	388420	1284200	1837300	0.00153457	0.00259053	0.00420683	3	0.00277731	0.00109891	107290	3961800	499970	0.000204996	0.00829416	0.00116705	3	0.00322207	0.00360795	330640
P161_RS0104905	P161_RS0104905	949	aspartate--tRNA ligase			41	41	41	34	36	35	19	19	15	13	14	17	70.9	66.17	2492700000	183830000	450670000	561730000	193540000	314890000	164310000	284260000	98104000	241360000	71219000	5252400	12876000	16049000	0.0207511	0.0259739	0.0367471	3	0.0278241	0.00666007	5529700	8996700	4694400	0.0105655	0.0188349	0.0109579	3	0.0134527	0.00380913	8121700
P161_RS0104910	P161_RS0104910	950	cupin domain-containing protein			5	5	5	4	4	1	0	2	1	2	1	1	38.7	13.714	10670000	2359800	2902800	483360	0	228450	244390	759890	2386300	1304600	1185500	262200	322540	53707	0.0010359	0.000650639	0.000122972	3	0.00060317	0.000374209	0	25383	27155	0	5.31402e-05	6.33863e-05	2	5.82632e-05	2.77823e-05	84433
P161_RS0104920	P161_RS0104920	952	hypothetical protein			4	4	4	4	1	0	1	0	0	0	0	0	15.9	24.629	2335300	2121200	214090	0	0	0	0	0	0	0	259480	235690	23788	0	0.000931162	4.7986e-05	0	2	0.000489574	0.000428092	0	0	0	0	0	0	0	0	0	0
P161_RS0104925	P161_RS0104925	953	molecular chaperone DnaK			15	15	15	12	13	6	6	8	6	7	0	6	82.4	14.249	1033700000	60931000	94327000	18454000	201540000	185830000	90315000	196540000	0	185740000	172280000	10155000	15721000	3075700	0.0401203	0.031713	0.00704237	3	0.0262919	0.0140375	33591000	30972000	15053000	0.0641815	0.0648409	0.0351373	3	0.0547199	0.0138496	32756000
P161_RS0104930	P161_RS0104930	954	isoleucine--tRNA ligase			78	78	78	62	65	65	30	44	36	40	36	32	70.4	132.92	15536000000	671630000	2201800000	2124900000	1069700000	3047900000	904470000	2381300000	1779800000	1354100000	267860000	11580000	37963000	36636000	0.0457502	0.0765803	0.0838847	3	0.0687384	0.0165264	18443000	52550000	15594000	0.0352386	0.110015	0.0364001	3	0.0605513	0.0349795	41058000
P161_RS18065	P161_RS18065	957	NAD(P)/FAD-dependent oxidoreductase			9	9	9	7	8	4	1	3	3	2	3	2	24.9	46.909	31206000	5405400	15204000	2988400	1146300	1155400	2314800	461830	1974900	554640	1486000	257400	724020	142300	0.00101693	0.00146052	0.000325822	3	0.000934425	0.000466898	54587	55017	110230	0.000104298	0.00011518	0.000257303	3	0.000158927	6.97042e-05	21992
P161_RS0104950	P161_RS0104950	958	DnaJ domain-containing protein			5	5	5	3	5	0	2	1	1	3	2	2	20.2	29.268	139720000	11282000	45572000	0	1970900	334060	246160	43717000	35664000	929180	10747000	867870	3505600	0	0.00342877	0.00707162	0	2	0.0052502	0.00288742	151600	25697	18935	0.000289658	5.37975e-05	4.41988e-05	3	0.000129218	0.000113516	3362800
P161_RS0104955	P161_RS0104955	959	hypothetical protein			3	3	3	3	1	2	0	1	0	0	0	1	25	14.016	2250500	618460	488600	762280	0	0	0	0	0	381170	450100	123690	97720	152460	0.000488674	0.000197124	0.000349085	3	0.000344961	0.00011906	0	0	0	0	0	0	0	0	0	0
P161_RS0104960	P161_RS0104960	960	BrxA/BrxB family bacilliredoxin			8	8	8	7	6	5	6	6	5	7	1	7	61.8	14.621	2071900000	187000000	92549000	163800000	462270000	181620000	202990000	358590000	6272200	416790000	258990000	23375000	11569000	20474000	0.0923498	0.0233374	0.0468789	3	0.0541887	0.0286444	57784000	22703000	25374000	0.110406	0.0475295	0.059229	3	0.0723883	0.0273039	44824000
P161_RS0104970	P161_RS0104970	962	HD domain-containing protein			8	8	8	6	6	1	0	0	0	0	0	0	40.6	25.113	86510000	26623000	59200000	686610	0	0	0	0	0	0	6654600	2047900	4553900	52816	0.00809083	0.00918629	0.000120932	3	0.00579935	0.00404008	0	0	0	0	0	0	0	0	0	0
P161_RS0104980	P161_RS0104980	964	AraC family transcriptional regulator	TR|AraC		7	7	7	4	5	0	2	2	0	3	2	1	25.2	33.246	230270000	46147000	154590000	0	1919600	519300	0	20686000	4285100	2123200	25585000	5127500	17176000	0	0.0202577	0.0346481	0	2	0.0274529	0.0142125	213290	57700	0	0.000407528	0.000120797	0	2	0.000264162	0.000170908	2298500
P161_RS0104985	P161_RS0104985	965	hypothetical protein			4	4	4	2	3	3	0	0	0	0	0	0	20.2	22.15	5962700	1328200	3693900	940520	0	0	0	0	0	0	542060	120750	335810	85502	0.000477058	0.000677408	0.000195772	3	0.00045008	0.00019755	0	0	0	0	0	0	0	0	0	0
P161_RS0105000	P161_RS0105000	967	2-oxoglutarate dehydrogenase E1 component			49	49	49	41	41	36	19	20	16	23	27	22	53.5	104.55	4459400000	308090000	567770000	627020000	373510000	494630000	341570000	470550000	808370000	467870000	99098000	6846400	12617000	13934000	0.0270487	0.0254515	0.0319044	3	0.0281349	0.00274407	8300300	10992000	7590500	0.0158592	0.0230121	0.0177181	3	0.0188631	0.00303035	10457000
P161_RS0105005	P161_RS0105005	968	peptidoglycan DD-metalloendopeptidase family protein			11	11	11	7	6	0	4	4	1	5	6	1	32.1	36.439	286330000	10258000	24453000	0	51686000	54923000	12709000	63614000	55136000	13550000	14316000	512880	1222600	0	0.00202628	0.00246627	0	2	0.00224628	0.00107403	2584300	2746100	635460	0.00493776	0.00574905	0.00148332	3	0.00405671	0.00184956	3180700
P161_RS0105010	P161_RS0105010	969	2-oxoglutarate dehydrogenase complex dihydrolipoyllysine-residue succinyltransferase			27	27	27	13	20	19	16	17	14	18	17	15	51.5	44.284	2897500000	156120000	660020000	742520000	153990000	288740000	198350000	301420000	257090000	139230000	160970000	8673300	36668000	41251000	0.0342664	0.073968	0.0944516	3	0.067562	0.0249846	8555200	16041000	11019000	0.0163462	0.0335824	0.025721	3	0.0252165	0.00704567	16746000
P161_RS0105015	P161_RS0105015	970	hypothetical protein			4	4	4	3	4	2	3	3	1	0	3	2	20.6	21.488	41046000	6043400	9885900	4025400	3128800	2079500	329390	0	15553000	0	6841000	1007200	1647700	670900	0.00397924	0.0033238	0.00153615	3	0.0029464	0.00103247	521470	346580	54898	0.00099636	0.000725577	0.000128145	3	0.000616694	0.000362713	0
P161_RS0105030	P161_RS0105030	973	AAA family ATPase	ODP|Unclassified		20	20	20	15	14	13	4	5	5	6	4	4	29.6	91.067	98145000	23400000	32643000	21486000	3014300	2568100	3646300	7649400	1861100	1876800	2282400	544190	759140	499670	0.00214998	0.00153136	0.00114408	3	0.00160848	0.00041426	70101	59723	84798	0.00013394	0.000125032	0.000197939	3	0.000152304	3.24732e-05	177890
P161_RS0105035	P161_RS0105035	974	molybdopterin molybdotransferase MoeA			6	6	6	4	4	2	2	2	3	2	2	1	25.8	44.674	60805000	4789100	12129000	7491300	7040700	2225400	8955100	3706200	2173100	12295000	3378000	266060	673810	416180	0.00105115	0.00135923	0.000952919	3	0.0011211	0.000173095	391150	123630	497500	0.000747361	0.000258824	0.00116128	3	0.00072249	0.000368848	205900
P161_RS0105045	P161_RS0105045	975	cyclic pyranopterin monophosphate synthase MoaC			2	2	2	2	1	0	0	0	1	1	0	0	11.3	17.443	3952400	1556600	2243100	0	0	0	0	152740	0	0	658740	259430	373850	0	0.00102495	0.000754144	0	2	0.000889549	0.000433667	0	0	0	0	0	0	0	0	0	25456
P161_RS0105050	P161_RS0105050	976	NTP transferase domain-containing protein			8	8	8	6	7	5	0	1	0	0	0	0	20.4	42.228	38463000	9018000	20466000	8642200	0	337400	0	0	0	0	2136900	501000	1137000	480120	0.00197935	0.0022936	0.00109932	3	0.00179076	0.00050547	0	18744	0	0	3.92412e-05	0	1	0	0	0
P161_RS0105055	P161_RS0105055	977	molybdopterin biosynthesis protein MoeB			12	12	12	9	8	5	0	3	1	2	0	0	33.6	40.369	24994000	8607900	9470200	1990900	0	989720	1428700	2506300	0	0	1190200	409900	450960	94803	0.00161943	0.000909693	0.000217069	3	0.000915397	0.000572526	0	47129	68032	0	9.86661e-05	0.000158803	2	0.000128735	6.5464e-05	119350
P161_RS0105060	P161_RS0105060	978	hypothetical protein			6	6	6	2	6	4	1	1	0	1	2	0	12.7	68.018	45846000	865770	15335000	11611000	0	445670	0	6009600	11579000	0	1910300	36074	638950	483800	0.000142521	0.00128891	0.00110775	3	0.000846394	0.000503179	0	18569	0	0	3.88748e-05	0	1	0	0	250400
P161_RS0105070	P161_RS0105070	980	acyl-ACP desaturase			20	20	20	18	19	16	13	11	11	11	10	5	47.2	38.206	2092000000	88802000	391300000	108740000	249830000	302650000	331480000	262430000	316280000	40459000	116220000	4933400	21739000	6041000	0.0194908	0.0438527	0.013832	3	0.0257252	0.0130246	13879000	16814000	18416000	0.0265183	0.0352007	0.0429874	3	0.0349021	0.0067268	14580000
P161_RS0105075	P161_RS0105075	981	1-acyl-sn-glycerol-3-phosphate acyltransferase			8	8	8	5	5	3	3	4	1	1	3	3	31.4	27.443	280220000	7188700	18503000	16464000	12598000	30954000	8146100	1696900	104880000	79796000	25475000	653520	1682100	1496700	0.00258192	0.00339319	0.00342696	3	0.00313403	0.00039064	1145200	2814000	740560	0.00218811	0.0058912	0.00172864	3	0.00326932	0.00186342	154260
P161_RS0105085	P161_RS0105085	983	hypothetical protein			38	38	38	31	29	34	28	24	24	27	23	24	72.6	61.409	44934000000	4444100000	5765400000	6926200000	5576300000	6796800000	5173600000	4039200000	2710300000	3502500000	2246700000	222210000	288270000	346310000	0.877906	0.581509	0.792939	3	0.750785	0.124621	278810000	339840000	258680000	0.532715	0.711466	0.603821	3	0.616001	0.0734812	201960000
P161_RS0105090	P161_RS0105090	984	TonB-dependent receptor plug domain-containing protein	putative SusC-like		63	63	63	55	53	54	50	51	49	52	50	47	78	92.733	120520000000	6970600000	12428000000	9980500000	14924000000	14835000000	14924000000	15416000000	17140000000	13903000000	3171600000	183440000	327050000	262640000	0.724733	0.659737	0.601362	3	0.661944	0.0503905	392720000	390400000	392730000	0.75036	0.817315	0.916726	3	0.828134	0.068348	405680000
P161_RS0105095	P161_RS0105095	985	glucose-6-phosphate isomerase			23	23	23	16	19	18	14	15	15	18	17	16	61.6	58.848	6814700000	186440000	660590000	627020000	763260000	977760000	818450000	1430800000	1054300000	296170000	262110000	7170600	25407000	24116000	0.0283296	0.0512519	0.0552179	3	0.0449331	0.0118516	29356000	37606000	31479000	0.0560898	0.0787294	0.0734795	3	0.0694329	0.00967538	55031000
P161_RS0105100	P161_RS0105100	986	peptidoglycan DD-metalloendopeptidase family protein			10	10	10	7	9	8	7	6	5	3	3	4	19.7	47.21	91027000	10281000	14277000	40257000	10412000	7386700	4291600	1525700	1481400	1114600	4334600	489560	679860	1917000	0.00193415	0.00137144	0.00438932	3	0.00256497	0.0013103	495790	351750	204360	0.000947294	0.0007364	0.000477025	3	0.00072024	0.000192326	72654
P161_RS0105105	P161_RS0105105	987	DUF3108 domain-containing protein			14	14	14	8	10	0	7	5	3	7	5	3	53.5	29.816	141160000	11740000	56406000	0	20114000	1801500	2459900	5554400	19459000	23623000	8822400	733740	3525400	0	0.00289885	0.00711157	0	2	0.00500521	0.00291975	1257100	112600	153740	0.00240191	0.000235732	0.000358866	3	0.000998836	0.000993396	347150
P161_RS0105110	P161_RS0105110	988	tryptophan 2,3-dioxygenase			13	13	13	7	11	2	3	3	2	4	3	3	42.3	36.098	384390000	19682000	260170000	673940	2292100	803700	713170	43668000	37880000	18505000	22611000	1157800	15304000	39643	0.00457423	0.0308718	9.07698e-05	3	0.0118456	0.0135775	134830	47277	41951	0.000257616	9.8976e-05	9.79237e-05	3	0.000151505	7.5033e-05	2568700
P161_RS0105115	P161_RS0105115	989	4-hydroxyphenylpyruvate dioxygenase			24	24	24	14	16	18	11	11	13	11	14	16	60.2	44.03	1022800000	127540000	183630000	103160000	60328000	9392100	86186000	135130000	201710000	115710000	37881000	4723800	6801100	3820700	0.0186628	0.0137194	0.00874818	3	0.0137101	0.00404761	2234400	347860	3192100	0.00426921	0.000728256	0.00745113	3	0.00414953	0.00274591	5004800
P161_RS0105125	P161_RS0105125	991	homogentisate 1,2-dioxygenase			10	10	10	6	9	3	3	3	5	4	5	4	27.8	44.583	126330000	7456100	26240000	4527100	3021000	1025300	33611000	8279800	18089000	24082000	7431200	438600	1543500	266300	0.00173282	0.0031136	0.000609742	3	0.00181872	0.001024	177710	60313	1977100	0.000339546	0.000126267	0.00461503	3	0.00169361	0.00206759	487050
P161_RS0105130	P161_RS0105130	992	hypothetical protein			13	13	13	11	12	3	8	5	3	1	1	1	46.1	26.774	354210000	74764000	136050000	1599500	62171000	54159000	24629000	0	352360	485460	32201000	6796800	12368000	145410	0.0268527	0.0249492	0.000332942	3	0.0173783	0.0120779	5651900	4923600	2239000	0.0107989	0.0103077	0.00522636	3	0.00877768	0.00251915	0
P161_RS0105135	P161_RS0105135	993	ferritin			3	3	3	3	3	3	3	3	3	3	0	3	22.6	19.513	559450000	2338400	33419000	21042000	111640000	95231000	94851000	127080000	0	73842000	139860000	584590	8354700	5260500	0.00230959	0.0168534	0.0120449	3	0.0104026	0.00604998	27910000	23808000	23713000	0.0533269	0.0498428	0.0553518	3	0.0528405	0.00227519	31770000
P161_RS0105160	P161_RS0105160	997	NAD(P)/FAD-dependent oxidoreductase			21	12	12	11	9	6	3	2	6	2	3	2	69.5	38.501	381100000	69556000	164020000	27899000	2182600	1657300	98631000	2446700	4763000	9942600	21172000	3864200	9112500	1549900	0.0152667	0.0183821	0.00354878	3	0.0123992	0.0063861	121260	92074	5479500	0.000231688	0.00019276	0.0127905	3	0.00440497	0.00592946	135930
P161_RS0105170	P161_RS0105170	999	Mrp/NBP35 family ATP-binding protein			32	32	32	26	27	20	17	13	14	16	22	19	68.9	41.107	2772700000	214180000	614580000	385910000	80945000	22788000	137000000	313170000	729920000	274230000	126030000	9735600	27935000	17541000	0.0384633	0.0563515	0.0401633	3	0.0449927	0.00806181	3679300	1035800	6227200	0.00702995	0.00216848	0.0145358	3	0.0079114	0.00508726	14235000
P161_RS0105180	P161_RS0105180	1001	tRNA (guanosine(46)-N7)-methyltransferase TrmB			11	11	11	7	10	3	8	9	6	7	5	5	52.7	26.394	897010000	68480000	144230000	2833600	102270000	100720000	132360000	107930000	115910000	122280000	64072000	4891400	10302000	202400	0.0193249	0.0207816	0.000463431	3	0.0135233	0.00925385	7304700	7194100	9454200	0.0139569	0.0150611	0.0220684	3	0.0170288	0.00359192	7709600
P161_RS0105200	P161_RS0105200	1005	uracil phosphoribosyltransferase			9	9	9	6	7	0	2	1	0	3	2	3	49.3	24.309	331060000	53707000	152260000	0	26929000	220530	0	32474000	18982000	46484000	30096000	4882400	13842000	0	0.0192894	0.0279226	0	2	0.023606	0.0116728	2448100	20048	0	0.00467752	4.19712e-05	0	2	0.00235975	0.00219518	2952200
P161_RS0105210	P161_RS0105210	1007	YicC family protein			21	21	21	14	18	1	12	10	4	10	9	9	60.9	32.969	743160000	31123000	247440000	35854	109600000	24963000	2853000	114750000	134890000	77499000	37158000	1556200	12372000	1792.7	0.00614822	0.0249572	4.10471e-06	3	0.0103699	0.0106154	5480200	1248200	142650	0.0104709	0.00261315	0.000332979	3	0.00447234	0.00434256	5737600
P161_RS0105215	P161_RS0105215	1008	guanylate kinase			13	13	13	10	9	3	3	2	1	3	4	3	66	22.552	381120000	45179000	30423000	4183800	42015000	50899000	1082300	105790000	34325000	67224000	31760000	3764900	2535200	348650	0.0148743	0.0051141	0.000798297	3	0.00692891	0.00588806	3501200	4241600	90193	0.00668966	0.00887993	0.000210532	3	0.00526004	0.0036808	8815700
P161_RS0105220	P161_RS0105220	1009	nicotinate-nucleotide adenylyltransferase			3	3	3	0	3	0	1	0	0	0	0	0	19.1	23.274	2411400	0	2119000	0	292360	0	0	0	0	0	267930	0	235450	0	0	0.000474958	0	1	0	0	32484	0	0	6.20664e-05	0	0	1	0	0	0
P161_RS0105225	P161_RS0105225	1010	M23 family metallopeptidase			7	7	7	5	5	7	1	2	2	1	2	0	27.1	32.307	87109000	7512200	17765000	56639000	1045800	1920500	1537200	377270	312020	0	6222100	536580	1269000	4045600	0.00211992	0.00255987	0.00926313	3	0.00464764	0.00326858	74698	137180	109800	0.000142724	0.000287191	0.0002563	3	0.000228738	6.21151e-05	26948
P161_RS0105230	P161_RS0105230	1011	GH3 auxin-responsive promoter family protein			17	17	17	8	12	12	5	5	4	3	4	3	34.1	56.724	335730000	11879000	55968000	77127000	96518000	45607000	34647000	7835900	4548400	1596000	14597000	516500	2433400	3353400	0.00204058	0.00490874	0.00767821	3	0.00487585	0.00230167	4196400	1982900	1506400	0.00801796	0.00415127	0.0035163	3	0.00522851	0.0019894	340690
P161_RS0105240	P161_RS0105240	1012	6-carboxytetrahydropterin synthase			8	8	8	7	6	3	2	3	3	5	0	6	59.1	17.09	961160000	79486000	55454000	120430000	1191300	82363000	64174000	237180000	0	320890000	106800000	8831800	6161500	13381000	0.0348926	0.0124292	0.0306382	3	0.0259867	0.00974265	132370	9151500	7130400	0.000252916	0.019159	0.0166441	3	0.0120187	0.00838274	26353000
P161_RS0105250	P161_RS0105250	1014	aminoacyl-tRNA hydrolase			4	4	4	4	4	2	2	2	1	2	1	2	26.8	23.591	119830000	13315000	14856000	3413200	2137100	2476400	280290	28161000	775450	54413000	10893000	1210500	1350500	310290	0.00478243	0.00272428	0.000710465	3	0.00273906	0.00166241	194280	225130	25481	0.000371206	0.000471317	5.94788e-05	3	0.000300667	0.000175375	2560100
P161_RS0105255	P161_RS0105255	1015	50S ribosomal protein L25/general stress protein Ctc			14	14	14	10	12	10	10	10	10	9	10	11	84.3	22.405	53712000000	1267200000	1823500000	6174600000	8883800000	6599200000	4201600000	7122900000	9013000000	8626100000	5968000000	140800000	202610000	686070000	0.556272	0.408712	1.57088	3	0.845288	0.516596	987090000	733250000	466840000	1.88601	1.53508	1.08972	3	1.5036	0.325846	791430000
P161_RS0105260	P161_RS0105260	1016	ribose-phosphate pyrophosphokinase			19	19	19	16	18	6	11	10	10	9	9	5	73.5	34.529	3565300000	234910000	1142000000	73621000	465170000	361760000	352580000	415430000	454100000	65769000	209720000	13818000	67176000	4330700	0.0545921	0.13551	0.00991592	3	0.0666726	0.0519802	27363000	21280000	20740000	0.0522818	0.0445504	0.0484121	3	0.0484148	0.00315634	24437000
P161_RS0105270	P161_RS0105270	1018	LysR family transcriptional regulator	OCS|LysR		2	2	2	1	1	0	0	0	0	1	0	0	7.9	33.865	1723600	311230	1038800	0	0	0	0	373570	0	0	114910	20748	69253	0	8.1971e-05	0.0001397	0	2	0.000110835	5.73177e-05	0	0	0	0	0	0	0	0	0	24904
P161_RS0105275	P161_RS0105275	1019	histidine ammonia-lyase			9	9	9	5	8	5	0	1	0	1	0	0	23.1	55.182	29937000	5793600	16568000	7472400	0	0	0	102360	0	0	1496800	289680	828420	373620	0.00114447	0.00167112	0.00085547	3	0.00122369	0.000337666	0	0	0	0	0	0	0	0	0	5118
P161_RS0105280	P161_RS0105280	1020	urocanate hydratase			13	13	13	9	9	6	0	0	0	1	0	0	23.9	74.737	79266000	5102600	49084000	24773000	0	0	0	306370	0	0	2830900	182230	1753000	884750	0.000719953	0.00353622	0.00202579	3	0.00209399	0.00115075	0	0	0	0	0	0	0	0	0	10942
P161_RS0105285	P161_RS0105285	1021	imidazolonepropionase			7	7	7	6	6	2	0	0	0	0	0	0	19.4	45.896	35191000	5830500	17752000	11608000	0	0	0	0	0	0	1675800	277650	845340	552770	0.00109694	0.00170525	0.00126567	3	0.00135595	0.000256417	0	0	0	0	0	0	0	0	0	0
P161_RS0105295	P161_RS0105295	1023	bifunctional 4-hydroxy-2-oxoglutarate aldolase/2-dehydro-3-deoxy-phosphogluconate aldolase			11	11	11	5	7	0	3	0	2	1	2	1	54.1	23.971	13054000	1506000	10088000	0	596940	0	618640	0	244040	0	1004100	115850	775990	0	0.000457699	0.00156536	0	2	0.00101153	0.000657159	45919	0	47588	8.77363e-05	0	0.000111082	2	9.94091e-05	4.78212e-05	0
P161_RS0105300	P161_RS0105300	1024	sugar kinase			6	6	6	3	5	1	1	1	1	2	2	2	17.8	37.824	19933000	3895100	13307000	941210	0	67345	101050	305110	989980	326120	1245800	243440	831720	58826	0.000961781	0.00167778	0.000134693	3	0.00092475	0.000630505	0	4209.1	6315.6	0	8.81189e-06	1.47421e-05	2	1.1777e-05	6.05665e-06	19069
P161_RS0105305	P161_RS0105305	1025	LacI family transcriptional regulator	OCS|LacI		6	6	6	4	4	2	0	0	0	0	1	0	25.1	38.186	7335100	2745400	3777600	812000	0	0	0	0	0	0	523930	196100	269830	58000	0.00077475	0.000544311	0.000132801	3	0.000483954	0.000265527	0	0	0	0	0	0	0	0	0	0
P161_RS0105315	P161_RS0105315	1027	acetate--CoA ligase			18	18	18	15	15	16	9	8	7	8	8	10	34.6	71.658	456480000	61416000	86449000	73521000	55722000	87023000	16692000	33954000	14727000	26975000	14725000	1981200	2788700	2371600	0.00782731	0.00562547	0.00543021	3	0.00629433	0.00108691	1797500	2807200	538460	0.00343444	0.00587697	0.0012569	3	0.00352277	0.00188717	1095300
P161_RS0105320	P161_RS0105320	1028	sugar MFS transporter			5	5	5	0	1	0	3	3	2	2	1	1	14.5	46.573	28077000	0	8507300	0	10968000	55873	8068400	437890	0	39758	3509600	0	1063400	0	0	0.00214513	0	1	0	0	1371000	6984.1	1008500	0.00261954	1.46214e-05	0.00235408	3	0.00166275	0.00117043	54736
P161_RS18075	P161_RS18075	1029	aminoglycoside phosphotransferase family protein			8	8	8	4	2	4	1	3	1	1	4	3	21.6	41.464	25785000	5419300	2791800	3200900	1518500	4587200	1043700	854700	4350000	2019300	1074400	225800	116320	133370	0.000892089	0.000234645	0.000305375	3	0.00047737	0.000294669	63271	191130	43487	0.00012089	0.000400137	0.000101509	3	0.000207512	0.000136436	35613
P161_RS0105330	P161_RS0105330	1030	nucleotide-diphospho-sugar transferase			15	15	15	9	12	11	4	4	3	3	4	2	45.7	34.934	57511000	7549700	21175000	16562000	2625600	1434100	1451000	1198500	5219800	295510	3834000	503310	1411700	1104100	0.00198847	0.00284773	0.00252804	3	0.00245475	0.000354598	175040	95606	96730	0.000334445	0.000200154	0.000225791	3	0.000253463	5.8211e-05	79903
P161_RS0105335	P161_RS0105335	1031	hypothetical protein			20	20	20	13	15	19	6	8	7	7	11	10	65.6	37.208	919490000	62730000	101240000	158290000	79373000	93581000	43978000	36373000	217930000	125990000	54087000	3690000	5955200	9311300	0.0145784	0.012013	0.0213199	3	0.0159705	0.00392494	4669000	5504800	2587000	0.00892094	0.0115245	0.00603868	3	0.00882803	0.00224053	2139600
P161_RS0105345	P161_RS0105345	1033	DUF1800 domain-containing protein			4	4	4	0	0	1	4	2	0	0	0	0	9.9	55.263	43129000	0	0	761290	40253000	2114400	0	0	0	0	1487200	0	0	26251	0	0	6.01064e-05	1	0	0	1388000	72911	0	0.00265202	0.000152642	0	2	0.00140233	0.00121579	0
P161_RS0105350	P161_RS0105350	1034	response regulator transcription factor	RR|LytTR		19	19	17	13	16	2	8	5	5	10	8	3	69	26.794	467650000	44267000	111770000	9017500	109050000	37867000	2006000	92945000	60024000	702640	31177000	2951100	7451400	601160	0.0116592	0.0150312	0.00137646	3	0.00935563	0.00580764	7270000	2524500	133740	0.0138906	0.00528512	0.000312181	3	0.00649597	0.0056091	6196300
P161_RS0105365	P161_RS0105365	1037	AsnC family transcriptional regulator	TR|ArsR		6	6	6	5	3	2	2	2	1	0	0	1	41.6	16.786	15290000	4493500	4180100	2474700	1565900	1222000	325910	0	0	1028400	2184400	641930	597150	353530	0.00253613	0.00120459	0.000809471	3	0.00151673	0.000738653	223700	174570	46558	0.000427418	0.000365468	0.000108678	3	0.000300521	0.000137991	0
P161_RS0105370	P161_RS0105370	1038	acetyl-CoA carboxylase biotin carboxylase subunit			35	35	35	26	31	26	22	26	26	18	27	26	82.1	49.801	8754900000	389860000	1247000000	1823100000	792190000	563260000	808180000	733750000	1433800000	963710000	336730000	14995000	47962000	70117000	0.0592421	0.0967507	0.160546	3	0.105513	0.0418185	30469000	21664000	31084000	0.0582164	0.0453543	0.0725575	3	0.0587094	0.0111111	28221000
P161_RS0105375	P161_RS0105375	1039	acetyl-CoA carboxylase biotin carboxyl carrier protein			14	14	14	13	13	10	7	7	4	8	6	6	79.7	16.88	5098700000	118050000	334380000	368560000	676790000	542120000	449180000	594950000	1058400000	956240000	637340000	14756000	41798000	46070000	0.0582979	0.0843164	0.105486	3	0.0827	0.0192982	84599000	67766000	56147000	0.161641	0.14187	0.131061	3	0.144857	0.0126619	74369000
P161_RS0105380	P161_RS0105380	1040	ketoacyl-ACP synthase III			23	23	23	17	22	9	13	15	14	17	15	10	74	36.225	3092600000	318100000	945250000	16622000	213090000	316560000	262130000	467810000	419170000	133860000	171810000	17672000	52514000	923460	0.0698184	0.105933	0.00211443	3	0.0592887	0.0430328	11838000	17587000	14563000	0.0226186	0.036819	0.0339935	3	0.0311437	0.00613754	25989000
P161_RS0105385	P161_RS0105385	1041	50S ribosomal protein L32			5	5	5	3	3	4	4	4	3	3	1	4	68.2	7.7046	306310000	18409000	43223000	44808000	30373000	17264000	6652800	94347000	857220	50380000	76579000	4602100	10806000	11202000	0.0181819	0.0217983	0.025649	3	0.0218764	0.00304891	7593300	4315900	1663200	0.0145083	0.00903548	0.00388231	3	0.00914204	0.00433871	23587000
P161_RS0105390	P161_RS0105390	1042	DUF177 domain-containing protein			7	7	7	6	6	2	3	3	3	3	2	3	24.7	20.647	92914000	20477000	40437000	690940	2654400	1610200	25050000	621760	797650	574770	23229000	5119200	10109000	172740	0.0202249	0.0203922	0.000395519	3	0.0136709	0.00938735	663600	402550	6262600	0.00126792	0.000842752	0.0146184	3	0.00557636	0.00639605	155440
P161_RS0105395	P161_RS0105395	1043	4-hydroxythreonine-4-phosphate dehydrogenase PdxA			19	19	19	14	13	17	9	9	11	7	6	8	75.4	37.684	639630000	52956000	94009000	126710000	65227000	81566000	72007000	51832000	21468000	73859000	29074000	2407100	4273100	5759400	0.00950995	0.00861985	0.0131872	3	0.010439	0.00197695	2964900	3707600	3273100	0.00566496	0.00776198	0.0076402	3	0.00702238	0.000961128	2356000
P161_RS0105400	P161_RS0105400	1044	riboflavin synthase			3	3	3	2	3	1	1	1	1	1	2	2	23.7	21.44	210090000	4916100	11300000	2646800	129830	0	826510	31088000	57327000	101850000	19099000	446920	1027200	240620	0.00176569	0.00207211	0.000550943	3	0.00146291	0.000656881	11803	0	75137	2.25517e-05	0	0.000175388	2	9.89698e-05	7.7909e-05	2826200
P161_RS0105405	P161_RS0105405	1045	DNA polymerase III subunit delta'			12	12	12	9	10	9	3	2	3	1	1	0	31.8	43.304	57570000	12868000	20526000	12511000	4867600	697990	5393800	501660	202850	0	2302800	514720	821060	500450	0.00203355	0.00165627	0.00114587	3	0.0016119	0.00036375	194700	27919	215750	0.000372008	5.84494e-05	0.000503612	3	0.000311357	0.000186729	20066
P161_RS0105415	P161_RS0105415	1047	phosphoglycerate kinase			38	38	38	35	35	34	25	25	31	25	25	27	91.6	42.475	31909000000	2158000000	4913200000	6093600000	2561200000	1975900000	3007600000	3818700000	4253200000	3128100000	1139600000	77072000	175470000	217630000	0.304496	0.353964	0.498303	3	0.385588	0.0822207	91471000	70566000	107410000	0.174771	0.147732	0.250721	3	0.191075	0.0435967	136380000
P161_RS0105420	P161_RS0105420	1048	aldo/keto reductase			20	20	20	16	18	19	9	10	8	8	9	8	55.5	38.821	1266500000	153830000	284560000	342980000	126830000	40218000	32550000	87325000	155890000	42371000	74503000	9048600	16739000	20175000	0.0357491	0.0337665	0.0461943	3	0.03857	0.00545163	7460400	2365800	1914700	0.0142544	0.00495288	0.00446937	3	0.00789222	0.00450307	5136700
P161_RS0105425	P161_RS0105425	1049	DUF695 domain-containing protein			8	8	8	5	7	5	1	2	0	0	1	0	22.1	43.188	43451000	9321000	26392000	5536800	1351600	403080	0	0	447050	0	2715700	582560	1649500	346050	0.00230157	0.00332743	0.000792344	3	0.00214045	0.0010412	84476	25193	0	0.000161406	5.27424e-05	0	2	0.000107074	6.71992e-05	0
P161_RS0105435	P161_RS0105435	1051	N-acetyltransferase			4	4	4	3	2	1	1	2	1	1	1	1	29.7	20.799	766530000	12527000	16677000	70201000	200080000	151760000	38638000	47505000	95782000	133360000	153310000	2505400	3335300	14040000	0.00989832	0.00672809	0.0321471	3	0.0162578	0.0113097	40015000	30353000	7727500	0.0764557	0.063545	0.0180378	3	0.0526795	0.025056	9501000
P161_RS0105440	P161_RS0105440	1052	deoxyribose-phosphate aldolase			14	14	14	11	11	0	4	5	2	9	8	6	64.1	27.45	376150000	44304000	62429000	0	47654000	22775000	533750	115100000	43684000	39665000	23509000	2769000	3901800	0	0.0109397	0.00787085	0	2	0.0094053	0.00460732	2978400	1423400	33359	0.00569076	0.00297994	7.78679e-05	3	0.00291619	0.0022919	7193900
P161_RS0105445	P161_RS0105445	1053	hypothetical protein			3	3	3	2	1	3	0	0	0	0	0	0	12	28.524	12934000	2897600	5129300	4907500	0	0	0	0	0	0	1293400	289760	512930	490750	0.00114478	0.0010347	0.00112366	3	0.00110105	4.77001e-05	0	0	0	0	0	0	0	0	0	0
P161_RS0105470	P161_RS0105470	1058	NAD(P)/FAD-dependent oxidoreductase			6	6	6	1	3	0	4	1	0	1	2	2	47.3	22.25	119360000	148090	23322000	0	9612200	18491000	0	0	49238000	18545000	11936000	14809	2332200	0	5.85073e-05	0.0047046	0	2	0.00238155	0.00220411	961220	1849100	0	0.00183658	0.00387115	0	2	0.00285387	0.00158108	0
P161_RS0105480	P161_RS0105480	1060	uroporphyrinogen-III synthase			19	19	19	16	17	7	12	9	9	12	12	10	73.8	28.637	2015000000	96636000	358670000	29147000	422660000	83601000	200720000	382830000	216130000	224620000	167920000	8053000	29889000	2428900	0.0318157	0.0602932	0.00556141	3	0.0325568	0.0223503	35222000	6966700	16727000	0.0672978	0.014585	0.0390448	3	0.0403092	0.0215385	31902000
P161_RS0105490	P161_RS0105490	1062	polyprenol monophosphomannose synthase	CAZyme, single-domain, contains GT2 domain		17	17	17	10	16	1	4	2	2	2	2	2	56.9	27.423	90324000	8748000	75155000	3350300	594120	1100600	174540	689760	83039	428880	6021600	583200	5010300	223350	0.0023041	0.010107	0.0005114	3	0.00430749	0.00416564	39608	73372	11636	7.5678e-05	0.000153607	2.71612e-05	3	8.5482e-05	5.20846e-05	45984
P161_RS0105495	P161_RS0105495	1063	dihydroorotase			12	12	12	8	10	5	7	5	5	5	6	6	34.8	50.103	1100700000	20333000	245340000	13524000	255200000	7573400	89254000	75482000	176650000	217350000	61150000	1129600	13630000	751340	0.00446282	0.0274949	0.00172033	3	0.011226	0.0115582	14178000	420740	4958600	0.0270896	0.000880833	0.0115746	3	0.0131817	0.0107598	4193400
P161_RS18080	P161_RS18080	1064	DUF4296 domain-containing protein			4	4	4	3	3	1	1	0	0	0	1	0	25	18.752	25430000	5043400	19106000	0	138750	0	0	0	1141300	0	2825500	560380	2122900	0	0.00221395	0.00428239	0	2	0.00324817	0.00174862	15416	0	0	2.9455e-05	0	0	1	0	0	0
P161_RS0105505	P161_RS0105505	1065	NAD-dependent epimerase/dehydratase family protein			8	8	8	4	6	3	4	1	2	4	3	1	22.5	37.581	14981000	1901400	5923900	978800	1268400	294020	784430	2610700	1219200	0	713370	90542	282090	46610	0.000357713	0.000569042	0.000106722	3	0.000344492	0.000188973	60399	14001	37354	0.000115403	2.93116e-05	8.71932e-05	3	7.73025e-05	3.58357e-05	124320
P161_RS0105510	P161_RS0105510	1066	tyrosine--tRNA ligase			34	34	34	20	33	16	13	4	10	6	14	14	67	48.342	1824100000	79696000	587110000	249110000	193430000	63945000	184120000	101850000	165470000	199310000	79307000	3465000	25527000	10831000	0.0136895	0.051494	0.0247995	3	0.0299943	0.0158647	8410100	2780200	8005100	0.016069	0.00582044	0.0186858	3	0.0135251	0.00555176	4428300
P161_RS0105515	P161_RS0105515	1067	DUF4349 domain-containing protein			6	6	6	6	5	0	1	0	1	2	1	1	23.1	32.468	16428000	3890100	10074000	0	429250	0	0	1163300	661610	209910	1369000	324180	839500	0	0.00128077	0.00169347	0	2	0.00148712	0.000720997	35771	0	0	6.83468e-05	0	0	1	0	0	96943
P161_RS0105540	P161_RS0105540	1072	acyltransferase			11	11	11	3	9	0	2	3	0	1	1	1	41.4	36.963	54785000	1095500	44329000	0	0	597300	0	2529500	5617400	615820	3043600	60863	2462700	0	0.000240457	0.00496785	0	2	0.00260415	0.0022873	0	33183	0	0	6.94697e-05	0	1	0	0	140530
P161_RS0105545	P161_RS0105545	1073	hypothetical protein			2	2	2	2	2	0	0	0	0	0	0	0	26.6	15.827	6062000	1661200	4400800	0	0	0	0	0	0	0	1010300	276870	733470	0	0.00109386	0.00147958	0	2	0.00128672	0.000626673	0	0	0	0	0	0	0	0	0	0
P161_RS0105550	P161_RS0105550	1074	hypothetical protein			2	2	2	1	1	2	1	1	0	0	0	2	25.4	15.505	10381000	930090	0	3230900	413040	0	0	0	0	5807400	2595400	232520	0	807730	0.000918638	0	0.00184944	2	0.00138404	0.000755038	103260	0	0	0.000197296	0	0	1	0	0	0
P161_RS0105565	P161_RS0105565	1077	hypothetical protein			7	7	7	5	5	2	4	4	2	2	0	1	50.9	13.073	137770000	6543900	5802500	3417200	52056000	1965100	34896000	1525600	0	31561000	19681000	934850	828920	488170	0.0036934	0.00167213	0.00111775	3	0.00216109	0.00110689	7436600	280730	4985200	0.0142089	0.000587718	0.0116367	3	0.0088111	0.00590887	217940
P161_RS0105570	P161_RS0105570	1078	aldehyde dehydrogenase family protein			29	29	29	22	26	25	17	16	16	19	18	16	58.3	55.324	4184000000	218230000	728950000	700720000	586120000	392280000	291010000	443230000	577620000	245890000	190180000	9919600	33134000	31851000	0.0391903	0.0668391	0.0729286	3	0.0596527	0.0146811	26642000	17831000	13228000	0.0509042	0.0373298	0.0308773	3	0.0397038	0.00834649	20147000
P161_RS0105575	P161_RS0105575	1079	hypothetical protein			27	27	27	17	15	15	21	21	20	19	23	24	55.4	44.983	21860000000	185050000	255910000	592690000	3574500000	2493100000	2193300000	4522600000	5640500000	2402400000	1093000000	9252600	12795000	29635000	0.0365551	0.0258105	0.0678547	3	0.0434068	0.0178351	178730000	124660000	109660000	0.341495	0.26098	0.255973	3	0.286149	0.0391887	226130000
P161_RS0105580	P161_RS0105580	1080	hypothetical protein			6	6	6	2	1	0	1	2	1	2	2	4	35.5	20.732	64724000	835860	589440	0	591170	782260	200400	15734000	19744000	26247000	7191500	92873	65493	0	0.000366922	0.000132115	0	2	0.000249518	0.000151738	65686	86918	22267	0.000125505	0.000181966	5.19765e-05	3	0.000119816	5.32201e-05	1748200
P161_RS0105585	P161_RS0105585	1081	RNA polymerase sigma factor	SF|Unclassified		3	3	3	2	1	0	1	1	0	0	0	0	11.7	20.96	4940800	2862600	670540	0	817130	590560	0	0	0	0	617600	357820	83817	0	0.00141367	0.000169079	0	2	0.000791376	0.00063035	102140	73820	0	0.000195156	0.000154545	0	2	0.000174851	8.40763e-05	0
P161_RS0105590	P161_RS0105590	1082	serine hydrolase			8	8	8	1	3	4	4	4	2	5	5	6	20.3	48.275	21588000	237020	1771600	2692500	2094100	860750	963380	2593200	8395300	1979900	863510	9480.7	70864	107700	3.74563e-05	0.000142949	0.000246599	3	0.000142335	8.53831e-05	83766	34430	38535	0.00016005	7.20803e-05	8.99499e-05	3	0.00010736	3.79647e-05	103730
P161_RS0105600	P161_RS0105600	1084	hypothetical protein			2	2	2	2	2	0	0	0	1	0	0	0	12.3	19.648	1991000	612800	1267300	0	0	0	110910	0	0	0	199100	61280	126730	0	0.000242105	0.000255644	0	2	0.000248874	0.000117451	0	0	11091	0	0	2.58891e-05	1	0	0	0
P161_RS0105605	P161_RS0105605	1085	SDR family NAD(P)-dependent oxidoreductase			13	13	13	9	10	2	8	9	8	8	10	7	52.2	27.716	1296700000	33053000	99914000	3866900	160960000	103010000	101380000	214900000	276770000	302810000	86444000	2203500	6661000	257790	0.00870557	0.0134368	0.000590257	3	0.00757755	0.00530489	10730000	6867300	6758400	0.0205015	0.0143769	0.0157757	3	0.0168847	0.00262045	14327000
P161_RS0105610	P161_RS0105610	1086	hypothetical protein			3	3	3	3	2	1	1	2	1	1	1	1	20.3	35.659	412190000	77589000	168490000	872580	10832000	71258000	2313100	4609000	3121100	73108000	68699000	12931000	28082000	145430	0.0510877	0.056648	0.000332988	3	0.0360229	0.0253385	1805300	11876000	385510	0.00344934	0.0248628	0.000899873	3	0.00973734	0.0107458	768160
P161_RS0105615	P161_RS0105615	1087	hypothetical protein			4	4	4	2	1	2	1	2	2	1	0	1	19.4	18.472	12220000	2320800	1644300	1616400	600340	5507000	240030	0	0	291160	1357800	257860	182700	179600	0.00101875	0.000368549	0.000411227	3	0.000599509	0.000296961	66704	611890	26670	0.00012745	0.00128101	6.22542e-05	3	0.000490239	0.000559794	0
P161_RS0105620	P161_RS0105620	1088	ATP synthase F1 subunit gamma			22	22	22	20	21	18	11	12	12	12	10	10	68.3	31.703	5125600000	443510000	1558400000	709850000	363160000	371170000	323070000	570370000	593150000	192920000	341710000	29568000	103900000	47323000	0.116817	0.209591	0.108355	3	0.144921	0.0458589	24210000	24744000	21538000	0.0462575	0.0518024	0.0502749	3	0.0494449	0.00233855	38025000
P161_RS0105625	P161_RS0105625	1089	F0F1 ATP synthase subunit alpha			48	48	48	39	46	46	42	40	37	38	37	36	81.5	56.413	57388000000	2422800000	6339400000	6876600000	8008400000	7626200000	5467800000	8798000000	8717000000	3131300000	2207200000	93186000	243820000	264490000	0.368159	0.491843	0.605598	3	0.488533	0.0969623	308010000	293310000	210300000	0.588507	0.614054	0.490891	3	0.564484	0.0530732	338380000
P161_RS0105630	P161_RS0105630	1090	ATP synthase F1 subunit delta			12	12	12	9	12	9	8	7	6	5	6	5	76.2	20.542	4570700000	236400000	1000600000	763940000	537970000	513600000	467580000	484230000	319720000	246720000	457070000	23640000	100060000	76394000	0.0933967	0.201845	0.174918	3	0.15672	0.0461058	53797000	51360000	46758000	0.102789	0.107524	0.109144	3	0.106486	0.00269661	48423000
P161_RS0105635	P161_RS0105635	1091	F0F1 ATP synthase subunit B			24	24	24	17	22	11	9	12	11	11	1	7	74.1	18.531	3661300000	424700000	801620000	552310000	341990000	464520000	432780000	448710000	552860	194130000	457670000	53087000	100200000	69039000	0.209736	0.202127	0.158077	3	0.18998	0.0227715	42749000	58066000	54098000	0.0816795	0.121563	0.126278	3	0.10984	0.0200054	56089000
P161_RS0105645	P161_RS0105645	1093	F0F1 ATP synthase subunit A			8	8	8	8	8	7	4	5	4	3	3	3	22.3	42.267	975110000	51132000	101750000	95396000	107840000	133570000	108290000	154690000	117710000	104730000	81259000	4261000	8479000	7949700	0.0168343	0.0171041	0.0182023	3	0.0173802	0.000591604	8986800	11131000	9024500	0.0171709	0.0233031	0.0210654	3	0.0205131	0.00253376	12891000
P161_RS0105660	P161_RS0105660	1096	polymer-forming cytoskeletal protein			2	2	2	2	1	1	0	0	0	0	0	0	19.1	13.894	1626600	987050	639510	0	0	0	0	0	0	0	406640	246760	159880	0	0.000974898	0.000322516	0	2	0.000648707	0.000405524	0	0	0	0	0	0	0	0	0	0
P161_RS0105665	P161_RS0105665	1097	tetratricopeptide repeat protein	*		28	28	28	20	20	20	4	6	6	9	8	9	36.7	85.244	790370000	72813000	155410000	141940000	7487900	95618000	68900000	92827000	84590000	70775000	19759000	1820300	3885300	3548600	0.00719163	0.00783757	0.00812516	3	0.00771812	0.00039036	187200	2390400	1722500	0.000357678	0.00500438	0.00402073	3	0.0031276	0.00199937	2320700
P161_RS0105670	P161_RS0105670	1098	ABC transporter ATP-binding protein			3	3	3	0	2	0	1	0	0	0	0	0	9.1	25.803	612030	0	612030	0	0	0	0	0	0	0	61203	0	61203	0	0	0.000123461	0	1	0	0	0	0	0	0	0	0	0	0	0	0
P161_RS0105700	P161_RS0105700	1103	sialate O-acetylesterase	*		10	10	10	3	8	8	2	1	2	1	1	1	27.4	55.068	89967000	1259200	33619000	44542000	4624300	0	4158800	0	303390	1460400	3911600	54748	1461700	1936600	0.000216298	0.00294859	0.0044342	3	0.00253303	0.00174684	201060	0	180820	0.00038416	0	0.000422077	2	0.000403119	0.000190661	0
P161_RS0105710	P161_RS0105710	1105	T9SS type A sorting domain-containing protein			13	13	13	7	7	7	4	6	5	7	6	7	57.5	32.171	2688800000	112750000	173590000	111240000	194990000	500920000	215070000	748830000	375120000	256310000	298760000	12528000	19287000	12359000	0.0494955	0.0389064	0.0282982	3	0.0389	0.00865379	21666000	55658000	23897000	0.0413967	0.116522	0.0557813	3	0.0712333	0.0325579	83203000
P161_RS0105720	P161_RS0105720	1106	T9SS type A sorting domain-containing protein			8	8	8	0	2	4	4	4	4	6	7	5	11.5	99.496	34069000	0	795860	4244200	3901000	4987200	3758100	8263200	4778300	3340900	973400	0	22739	121260	0	4.58699e-05	0.000277647	2	0.000161758	0.000121524	111460	142490	107380	0.000212964	0.000298308	0.000250651	3	0.000253974	3.49206e-05	236090
P161_RS0105725	P161_RS0105725	1107	DUF5013 domain-containing protein			7	7	7	5	5	5	6	6	6	5	5	4	15.2	48.063	295910000	10478000	30079000	44652000	53249000	91113000	52919000	4830800	5632500	2953100	26901000	952510	2734500	4059300	0.00376317	0.00551613	0.0092945	3	0.00619127	0.00230807	4840800	8283000	4810800	0.0092492	0.0173407	0.0112296	3	0.0126065	0.00344386	439160
P161_RS0105730	P161_RS0105730	1108	DUF4959 domain-containing protein	*		10	10	10	8	10	9	7	7	7	2	5	3	33.2	45.559	850070000	20954000	83800000	148380000	243250000	77030000	218970000	19512000	36560000	1611400	44741000	1102800	4410500	7809500	0.00435693	0.00889702	0.0178813	3	0.0103784	0.00561977	12803000	4054200	11525000	0.0244624	0.0084876	0.0269021	3	0.0199507	0.0081666	1027000
P161_RS0105735	P161_RS0105735	1109	RagB/SusD family nutrient uptake outer membrane protein	SusD-like	xylose-cont.	23	23	23	19	19	20	13	12	11	6	5	9	50.3	73.888	1232100000	123850000	228470000	223240000	98168000	247250000	167690000	53106000	5764300	84515000	41069000	4128200	7615700	7441500	0.0163097	0.0153627	0.0170387	3	0.016237	0.000686147	3272300	8241600	5589700	0.0062523	0.0172541	0.0130477	3	0.0121847	0.00453272	1770200
P161_RS18090	P161_RS18090	1110	TonB-dependent receptor	SusC-like	xylose-cont.	32	32	32	17	20	23	14	12	8	21	16	15	33.9	116.39	447110000	23279000	53453000	48047000	24152000	16710000	47827000	102030000	71640000	59969000	7844000	408400	937770	842930	0.0016135	0.0018917	0.00193004	3	0.00181175	0.000141052	423710	293170	839070	0.000809572	0.000613761	0.00195859	3	0.00112731	0.000593217	1790100
P161_RS18095	P161_RS18095	1111	sulfatase-like hydrolase/transferase	Sulfatase|S1_19	xylose-cont.	11	11	10	4	8	3	3	1	4	5	3	5	28.6	53.457	184470000	2914500	35608000	5366300	34170000	1298500	32153000	65701000	3124800	4134500	8385000	132480	1618600	243920	0.000523401	0.0032651	0.000558499	3	0.001449	0.00128426	1553200	59024	1461500	0.00296766	0.000123569	0.00341149	3	0.00216757	0.00145664	2986400
P161_RS0105750	P161_RS0105750	1112	family 43 glycosylhydrolase	CAZyme, single-domain, contains GH43_24 domain *	xylose-cont.	11	11	11	5	8	8	4	5	5	2	4	4	31.5	43.793	170340000	4804400	16629000	46814000	19050000	37662000	37338000	1007800	2704400	4329800	8517000	240220	831460	2340700	0.000949059	0.00167725	0.00535946	3	0.00266192	0.00193047	952520	1883100	1866900	0.00181996	0.00394233	0.00435779	3	0.00337336	0.00111144	50391
P161_RS0105760	P161_RS0105760	1114	family 16 glycosylhydrolase	*	xylose-cont.	8	8	8	6	7	6	1	2	1	2	1	1	11.7	78.744	15759000	1173200	5599900	3886800	1384100	0	312430	118970	447200	2836900	492480	36662	175000	121460	0.000144844	0.000353016	0.000278105	3	0.000258655	8.60916e-05	43254	0	9763.4	8.26444e-05	0	2.27901e-05	2	5.27172e-05	3.48521e-05	3717.7
P161_RS0105765	P161_RS0105765	1115	DUF4981 domain-containing protein	CAZyme, single-domain, contains GH2 domain	xylose-cont.	48	48	47	32	40	38	17	25	14	22	19	19	45.9	123.29	1224200000	68667000	179500000	161060000	67808000	256890000	78641000	111970000	214120000	85589000	18549000	1040400	2719700	2440400	0.0041104	0.00548628	0.00558774	3	0.00506147	0.000673781	1027400	3892200	1191500	0.00196303	0.00814845	0.00278125	3	0.00429758	0.00274339	1696500
P161_RS19010	P161_RS19010	1116	family 43 glycosylhydrolase	CAZyme, multi-domain, contains a GH43_24 and a CBM32 domain	xylose-cont.	19	19	19	17	16	17	5	6	4	8	6	4	33.6	73.779	493130000	15014000	72962000	72802000	78974000	51353000	59456000	43261000	55890000	43422000	15908000	484330	2353600	2348400	0.00191349	0.00474777	0.00537709	3	0.00401278	0.00150649	2547600	1656500	1917900	0.00486764	0.00346794	0.00447684	3	0.0042708	0.000589704	1395500
P161_RS18105	P161_RS18105	1117	hypothetical protein	CAZyme, single-domain, contains GH2 domain	xylose-cont.	14	14	14	11	12	10	6	4	4	4	5	2	16.5	105.71	133160000	14223000	53571000	12577000	12995000	10601000	4700500	8513400	1163200	14816000	2560800	273510	1030200	241860	0.00108058	0.00207816	0.000553782	3	0.00123751	0.000632139	249890	203870	90395	0.000477459	0.000426809	0.000211004	3	0.000371757	0.000115535	163720
P161_RS0105780	P161_RS0105780	1118	T9SS type A sorting domain-containing protein	CAZyme, single-domain, contains GH30_5 domain	xylose-cont.	11	11	11	3	7	5	4	5	2	4	4	3	20.5	66.938	12464000	750920	3232300	1217200	353310	1093900	319380	4754300	717610	24645	461610	27812	119710	45081	0.000109879	0.000241483	0.000103221	3	0.000151528	6.36661e-05	13086	40514	11829	2.50031e-05	8.48174e-05	2.76117e-05	3	4.58107e-05	2.76024e-05	176090
P161_RS0105785	P161_RS0105785	1119	sulfatase	Sulfatase|S1_8	xylose-cont.	7	7	7	3	3	4	2	3	1	0	2	2	11.8	72.359	11590000	766410	3830300	2793000	1337300	1492000	0	0	829620	541300	297180	19652	98213	71615	7.7641e-05	0.000198119	0.000163975	3	0.000146578	5.06999e-05	34289	38256	0	6.55151e-05	8.00902e-05	0	2	7.28027e-05	3.48315e-05	0
P161_RS0105790	P161_RS0105790	1120	sulfatase-like hydrolase/transferase	Sulfatase|S1_15	xylose-cont.	8	8	8	5	6	2	1	2	0	1	2	0	18.8	55.98	30672000	21517000	6486300	1122100	0	607850	0	0	938350	0	1057600	741970	223670	38693	0.00293137	0.000451195	8.85946e-05	3	0.00115705	0.00126333	0	20960	0	0	4.38805e-05	0	1	0	0	0
P161_RS0105795	P161_RS0105795	1121	DUF5107 domain-containing protein		xylose-cont.	36	36	36	25	28	27	9	10	8	8	10	7	35.8	126.21	177610000	21199000	45606000	46480000	9476800	25268000	14508000	9346100	3148600	2575200	2691000	321200	690990	704240	0.00126899	0.00139389	0.00161248	3	0.00142512	0.000141958	143590	382850	219820	0.000274354	0.000801509	0.000513113	3	0.000529659	0.000215528	141610
P161_RS0105800	P161_RS0105800	1122	beta-galactosidase	CAZyme, single-domain, contains GH2 domain	xylose-cont.	11	11	3	5	5	4	4	2	2	2	3	3	11.8	106.71	29276000	5038400	7989300	7124900	2949700	1774600	463680	1787200	1362800	785800	597480	102820	163050	145410	0.000406221	0.00032891	0.000332942	3	0.000356024	3.55321e-05	60199	36216	9462.8	0.000115021	7.58194e-05	2.20884e-05	3	7.09762e-05	3.80937e-05	36474
P161_RS0105820	P161_RS0105820	1126	sulfatase	Sulfatase|S1_16	xylose-cont.	5	5	5	1	2	2	1	2	0	1	1	1	10.3	59.798	12306000	669880	1967000	4072100	1226700	2599800	0	947830	607300	214940	585980	31899	93669	193910	0.000126026	0.000188953	0.000443992	3	0.00025299	0.00013748	58415	123800	0	0.000111612	0.000259179	0	2	0.000185396	0.000106148	45135
P161_RS0105835	P161_RS0105835	1130	hypothetical protein	*		6	6	6	3	3	3	5	3	3	1	1	2	21.7	52.463	18465000	700540	6739700	2161000	4218900	1431000	1946900	485220	661550	120670	1154100	43784	421230	135060	0.000172982	0.00084972	0.000309244	3	0.000443982	0.000292244	263680	89435	121680	0.000503807	0.000187235	0.00028403	3	0.000325024	0.000132451	30327
P161_RS0105840	P161_RS0105840	1131	AraC family transcriptional regulator	OCS|AraC		8	8	8	4	6	0	1	1	0	2	0	0	24.7	34.764	20246000	2920500	16384000	0	0	487660	0	453800	0	0	1349800	194700	1092300	0	0.000769219	0.00220343	0	2	0.00148632	0.000913099	0	32511	0	0	6.80629e-05	0	1	0	0	30253
P161_RS18120	P161_RS18120	1132	hypothetical protein	CAZyme, single-domain, contains GH115 domain		10	10	10	5	6	5	4	2	2	2	0	2	12.2	98.176	19112000	3393000	4440800	3005900	4291800	1043500	1493900	773410	0	669240	434360	77114	100930	68317	0.000304661	0.0002036	0.000156424	3	0.000221562	6.18361e-05	97541	23717	33953	0.000186369	4.96523e-05	7.92545e-05	3	0.000105092	5.87285e-05	17578
P161_RS0105855	P161_RS0105855	1134	hypothetical protein	*		10	10	10	9	8	9	2	4	1	2	1	1	21	63.058	58655000	4986700	24633000	9703300	11032000	3712900	0	4183300	338290	65669	2346200	199470	985330	388130	0.000788065	0.00198764	0.000888694	3	0.00122147	0.000543324	441270	148520	0	0.000843124	0.000310932	0	2	0.000577028	0.000348132	167330
P161_RS0105860	P161_RS0105860	1135	T9SS type A sorting domain-containing protein	*		23	23	23	19	20	19	8	7	8	3	2	4	34.1	97.26	170350000	34535000	57298000	43891000	10173000	7594800	10903000	3471000	936690	1546300	4482800	908810	1507800	1155000	0.00359052	0.00304159	0.00264458	3	0.00309223	0.000387835	267700	199860	286920	0.000511488	0.000418414	0.00066974	3	0.000533214	0.000103747	91343
P161_RS0105865	P161_RS0105865	1136	T9SS type A sorting domain-containing protein			4	4	4	3	3	3	1	0	0	0	0	0	30.6	27.878	23073000	1097700	1816900	2028600	18130000	0	0	0	0	0	2307300	109770	181690	202860	0.000433679	0.000366512	0.000464485	3	0.000421558	4.09052e-05	1813000	0	0	0.00346405	0	0	1	0	0	0
P161_RS19020	P161_RS19020	1137	hypothetical protein	*		15	15	15	10	12	6	9	4	9	7	9	9	56.1	41.79	1027800000	50776000	104840000	79678000	109910000	6969400	147050000	172790000	236400000	119410000	68522000	3385100	6989200	5311900	0.0133738	0.0140989	0.0121626	3	0.0132118	0.000798762	7327200	464620	9803700	0.0139999	0.000972697	0.0228842	3	0.0126189	0.00899847	11520000
P161_RS0105875	P161_RS0105875	1139	tyrosine-type recombinase/integrase			5	5	5	0	0	3	1	1	0	0	0	0	10.6	50.552	1414000	0	0	993930	116910	303110	0	0	0	0	70698	0	0	49696	0	0	0.000113788	1	0	0	5845.7	15156	0	1.11692e-05	3.17296e-05	0	2	2.14494e-05	1.31413e-05	0
P161_RS0105880	P161_RS0105880	1140	hypothetical protein			4	4	4	2	3	3	2	1	2	1	1	1	16.5	33.573	11297000	587380	5220800	499270	1870900	92879	2140900	553530	274200	57363	753150	39158	348050	33285	0.000154705	0.000702099	7.6212e-05	3	0.000311005	0.000278395	124730	6191.9	142730	0.000238319	1.29629e-05	0.000333166	3	0.000194816	0.000134293	36902
P161_RS0105900	P161_RS0105900	1144	GIY-YIG nuclease family protein			7	7	7	2	5	2	1	1	1	1	1	2	16.7	39.496	146150000	14493000	24018000	35444000	5149400	3384000	3404400	7855800	39979000	12419000	7307300	724670	1200900	1772200	0.00286302	0.0024225	0.00405777	3	0.00311443	0.000690861	257470	169200	170220	0.000491942	0.000354226	0.000397334	3	0.000414501	5.75176e-05	392790
P161_RS0105905	P161_RS0105905	1145	type I restriction-modification system subunit M			25	25	25	20	17	15	9	12	10	5	8	7	45	61.971	362090000	68689000	56868000	55828000	73424000	73538000	18821000	5230900	5737800	3956700	11680000	2215800	1834400	1800900	0.00875417	0.00370042	0.00412349	3	0.00552602	0.00228917	2368500	2372200	607140	0.00452543	0.00496628	0.00141721	3	0.00363631	0.00157943	168740
P161_RS19025	P161_RS19025	1146	restriction endonuclease subunit S			11	11	11	8	8	6	4	5	2	4	5	4	24.3	46.848	53019000	8837400	18577000	4522900	5176900	3340200	973280	3946500	4403200	3241700	2305200	384230	807710	196650	0.00151801	0.00162934	0.000450266	3	0.00119921	0.000531528	225080	145230	42317	0.000430055	0.000304044	9.8778e-05	3	0.000277626	0.000136527	171590
P161_RS0105920	P161_RS0105920	1147	type I restriction endonuclease subunit R			23	23	23	17	14	11	8	7	4	6	10	7	26.1	110.94	90948000	16806000	25304000	12819000	8531100	5608500	1211600	6938200	7784100	5945700	1749000	323200	486610	246510	0.0012769	0.000981607	0.000564429	3	0.000940978	0.000292279	164060	107850	23299	0.000313465	0.000225788	5.43855e-05	3	0.000197879	0.000107594	133430
P161_RS0105925	P161_RS0105925	1148	hypothetical protein			5	5	5	3	2	0	3	2	0	1	0	0	39.3	19.284	10701000	4939900	3480200	0	1261800	822350	0	196710	0	0	1528700	705710	497180	0	0.00278811	0.00100293	0	2	0.00189552	0.00115308	180260	117480	0	0.000344418	0.000245948	0	2	0.000295183	0.000144841	28101
P161_RS0105935	P161_RS0105935	1150	hypothetical protein			8	8	8	5	6	7	2	4	2	4	0	5	74.6	15.9	870830000	30432000	38648000	176460000	85563000	113500000	98675000	168840000	0	158710000	96759000	3381400	4294200	19607000	0.0133592	0.00866242	0.0448938	3	0.0223051	0.0160873	9506900	12612000	10964000	0.0181646	0.0264036	0.0255926	3	0.023387	0.00370757	18760000
P161_RS0105940	P161_RS0105940	1151	hypothetical protein			4	4	4	3	3	2	0	1	1	0	0	0	33.3	15.962	14700000	4065700	7551100	2212100	0	585190	285710	0	0	0	1837500	508210	943880	276520	0.00200783	0.00190403	0.000633142	3	0.001515	0.000625007	0	73149	35714	0	0.00015314	8.33651e-05	2	0.000118252	6.26011e-05	0
P161_RS0105955	P161_RS0105955	1154	polyprenyl synthetase family protein			16	16	16	11	10	11	2	2	4	2	3	0	43	37.144	195310000	19048000	47072000	65193000	648930	31405000	31042000	818260	84042	0	10851000	1058200	2615100	3621900	0.00418073	0.00527527	0.00829299	3	0.00591633	0.00173895	36052	1744700	1724600	6.88837e-05	0.00365259	0.00402563	3	0.00258237	0.00178381	45459
P161_RS0105965	P161_RS0105965	1155	TetR/AcrR family transcriptional regulator	TR|TetR		7	7	7	5	5	4	0	1	0	1	0	1	38.3	23.579	7273000	1992700	3086000	1135600	0	193460	0	517120	0	348070	606080	166060	257160	94636	0.000656069	0.000518753	0.000216686	3	0.000463836	0.000183532	0	16121	0	0	3.37498e-05	0	1	0	0	43093
P161_RS0105970	P161_RS0105970	1156	TolC family protein			9	9	9	8	7	8	3	3	4	4	4	3	22.7	52.765	201260000	28854000	62648000	44273000	13810000	4279000	5562600	19692000	18519000	3618600	14376000	2061000	4474900	3162400	0.00814258	0.00902693	0.00724089	3	0.0081368	0.000729161	986440	305640	397330	0.00188477	0.000639867	0.000927464	3	0.0011507	0.000532177	1406600
P161_RS0105975	P161_RS0105975	1157	efflux RND transporter periplasmic adaptor subunit			28	28	28	23	21	15	12	9	15	11	15	15	70.5	43.241	2323800000	193310000	599570000	346340000	300190000	17445000	340450000	114170000	295720000	116620000	110660000	9205300	28551000	16493000	0.0363682	0.0575941	0.0377637	3	0.0439087	0.00969382	14295000	830700	16212000	0.0273131	0.0017391	0.0378427	3	0.0222983	0.0151598	5436600
P161_RS0105985	P161_RS0105985	1159	efflux RND transporter permease subunit			31	31	31	21	25	25	9	13	10	10	5	5	31.3	131.3	408960000	30668000	140030000	69222000	26191000	38453000	3594600	61327000	37684000	1793200	9974600	748000	3415300	1688300	0.00295519	0.00688947	0.00386567	3	0.00457011	0.00168163	638810	937890	87674	0.00122056	0.0019635	0.000204652	3	0.00112957	0.000720925	1495800
P161_RS0106005	P161_RS0106005	1163	tetratricopeptide repeat protein			11	11	11	7	7	6	3	3	1	3	2	3	14.3	115.39	40355000	3431300	5882200	16642000	889520	8692100	650370	2636700	488340	1042200	761410	64742	110980	314000	0.000255782	0.000223873	0.00071896	3	0.000399538	0.00022624	16783	164000	12271	3.20669e-05	0.000343339	2.86435e-05	3	0.000134683	0.000147549	49749
P161_RS0106010	P161_RS0106010	1164	hypothetical protein			13	13	13	10	10	8	10	6	5	2	4	4	22.5	65.126	72615000	9556800	16426000	10705000	23055000	5148200	4524900	1396500	1129400	673470	2504000	329540	566430	369140	0.00130194	0.00114262	0.000845213	3	0.00109659	0.000189279	794990	177520	156030	0.00151897	0.000371644	0.000364212	3	0.000751608	0.000542614	48155
P161_RS0106020	P161_RS0106020	1166	hypothetical protein			11	11	11	2	5	6	2	1	2	2	1	2	9.3	174.87	433680000	2818800	7870300	8494500	98695000	95190000	57073000	4418800	103920000	55205000	5354100	34800	97164	104870	0.000137488	0.000196003	0.000240119	3	0.000191203	4.20362e-05	1218500	1175200	704610	0.00232816	0.00246032	0.00164473	3	0.0021444	0.000357418	54553
P161_RS0106025	P161_RS0106025	1167	hypothetical protein			34	34	34	17	22	22	5	10	5	14	6	2	26.9	156.5	163470000	6330100	17969000	16067000	31538000	26278000	10287000	50072000	4820600	106950	1946100	75359	213920	191270	0.000297728	0.000431527	0.000437947	3	0.000389067	6.464e-05	375450	312840	122470	0.000717363	0.000654941	0.000285874	3	0.000552726	0.000190406	596100
P161_RS0106030	P161_RS0106030	1168	hypothetical protein			21	21	21	16	19	1	12	9	11	16	15	9	64.3	34.823	1313000000	28253000	129420000	0	90734000	39913000	641690000	231010000	102380000	49626000	72945000	1569600	7189800	0	0.00620116	0.0145035	0	2	0.0103523	0.00594172	5040800	2217400	35649000	0.00963133	0.0046422	0.0832133	3	0.0324956	0.0359206	12834000
P161_RS0106035	P161_RS0106035	1169	hypothetical protein			4	4	4	0	2	1	0	1	0	0	0	0	3.1	169.29	650630	0	229760	420880	0	0	0	0	0	0	8449.8	0	2983.8	5465.9	0	6.01903e-06	1.25152e-05	2	9.2671e-06	5.11053e-06	0	0	0	0	0	0	0	0	0	0
P161_RS0106040	P161_RS0106040	1170	hypothetical protein			23	23	23	18	13	10	6	4	6	3	2	4	38.5	72.903	162710000	32720000	42150000	22630000	22990000	8524100	13900000	8371300	5574000	5852500	5423700	1090700	1405000	754330	0.00430913	0.00283422	0.00172717	3	0.00295684	0.00105764	766340	284140	463320	0.00146423	0.000594857	0.0010815	3	0.00104686	0.000355763	279040
P161_RS0106045	P161_RS0106045	1171	hypothetical protein			13	13	13	9	13	12	7	7	5	5	2	4	33	52.1	309180000	14614000	78016000	76204000	67660000	30025000	20736000	18041000	1608400	2280300	15459000	730690	3900800	3810200	0.0028868	0.00786884	0.00872414	3	0.00649326	0.00257394	3383000	1501200	1036800	0.00646381	0.00314281	0.00242014	3	0.00400892	0.00176076	902070
P161_RS0106055	P161_RS0106055	1173	serine--tRNA ligase			22	22	22	15	18	17	12	4	5	9	9	11	61.1	47.348	2051200000	131820000	557540000	353180000	305190000	12683000	16777000	271990000	294840000	107150000	97675000	6277000	26550000	16818000	0.0247991	0.0535576	0.0385078	3	0.0389549	0.0117449	14533000	603960	798900	0.0277678	0.00126441	0.00186482	3	0.010299	0.0123548	12952000
P161_RS0106065	P161_RS0106065	1174	tetratricopeptide repeat protein			9	9	9	7	7	4	2	1	1	1	1	1	17	71.241	20689000	5255700	10237000	4620300	149510	0	72735	259060	40041	54290	713410	181230	353010	159320	0.000716002	0.000712105	0.000364792	3	0.000597633	0.000164651	5155.4	0	2508.1	9.8503e-06	0	5.85451e-06	2	7.8524e-06	4.04516e-06	8933.1
P161_RS0106070	P161_RS0106070	1175	DUF4286 family protein			3	3	3	2	2	1	0	0	0	0	0	0	22.9	12.769	2794800	1310700	857090	626940	0	0	0	0	0	0	558950	262150	171420	125390	0.0010357	0.000345795	0.000287103	3	0.000556199	0.000339904	0	0	0	0	0	0	0	0	0	0
P161_RS0106080	P161_RS0106080	1177	hypothetical protein			9	9	9	6	6	6	4	4	4	4	1	7	41.8	17.84	227090000	5877600	7057500	34136000	29470000	1516500	35270000	41745000	211780	71805000	22709000	587760	705750	3413600	0.00232212	0.00142366	0.00781605	3	0.00385395	0.00282554	2947000	151650	3527000	0.00563076	0.000317484	0.00823287	3	0.00472704	0.00329402	4174500
P161_RS0106085	P161_RS0106085	1178	16S rRNA (adenine(1518)-N(6)/adenine(1519)-N(6))-dimethyltransferase RsmA			11	11	11	4	11	0	0	0	0	0	0	0	42.7	30.623	142290000	5605800	136680000	0	0	0	0	0	0	0	10163000	400410	9762800	0	0.00158194	0.0196939	0	2	0.0106379	0.00893429	0	0	0	0	0	0	0	0	0	0
P161_RS0106090	P161_RS0106090	1179	magnesium transporter			6	6	6	3	3	5	1	0	0	2	2	1	17.1	49.34	44976000	1594900	23715000	19069000	208810	0	0	251460	117270	19030	3459700	122690	1824300	1466800	0.000484723	0.00368004	0.0033585	3	0.00250776	0.00143651	16062	0	0	3.06893e-05	0	0	1	0	0	19343
P161_RS0106105	P161_RS0106105	1182	RNA methyltransferase			11	11	11	7	9	4	3	3	3	3	3	2	62.5	19.642	85432000	8171100	21179000	2313400	1129300	13255000	25502000	12204000	737020	939860	7766500	742830	1925300	210310	0.00293477	0.00388379	0.000481543	3	0.00243337	0.0014335	102670	1205000	2318400	0.000196169	0.00252271	0.0054117	3	0.00271019	0.00213336	1109500
P161_RS0106110	P161_RS0106110	1183	DNA mismatch repair protein MutS			32	32	32	27	26	22	9	7	4	7	6	9	42.1	98.478	321100000	58758000	111470000	62322000	15538000	10992000	5089200	30992000	8440100	17500000	6175000	1130000	2143600	1198500	0.0044644	0.00432415	0.00274418	3	0.00384424	0.000779964	298800	211390	97869	0.00057091	0.000442552	0.00022845	3	0.000413971	0.000141262	596000
P161_RS0106115	P161_RS0106115	1184	hypothetical protein			11	11	11	8	9	1	3	3	4	7	7	3	44.8	27.706	246900000	18056000	57175000	518070	5093700	26748000	56835000	59672000	21888000	917860	20575000	1504600	4764600	43172	0.00594436	0.00961132	9.88501e-05	3	0.00521818	0.00391725	424470	2229000	4736200	0.000811024	0.00466649	0.0110554	3	0.00551098	0.00422468	4972700
P161_RS0106120	P161_RS0106120	1185	hypothetical protein			7	7	7	6	6	5	5	5	4	0	2	0	43.7	21.106	63087000	13237000	14338000	10081000	12372000	7662300	4704900	0	692810	0	4852900	1018200	1102900	775430	0.0040227	0.00222481	0.00177549	3	0.00267433	0.000970924	951730	589400	361920	0.00181845	0.00123393	0.000844808	3	0.00129906	0.000400146	0
P161_RS0106135	P161_RS0106135	1188	O-methyltransferase			15	15	15	11	13	1	4	2	1	2	2	1	51.9	24.573	141150000	20106000	116730000	1556600	1392000	0	0	618020	549180	202020	8821900	1256600	7295500	97285	0.00496457	0.0147167	0.000222752	3	0.00663469	0.00603385	86999	0	0	0.000166227	0	0	1	0	0	38626
P161_RS0106145	P161_RS0106145	1190	sigma-70 family RNA polymerase sigma factor	SF|Ecf		3	3	3	1	3	0	0	0	0	0	0	0	18.6	22.39	2231400	442330	1789100	0	0	0	0	0	0	0	202850	40212	162640	0	0.000158869	0.000328083	0	2	0.000243476	0.000133962	0	0	0	0	0	0	0	0	0	0
P161_RS18150	P161_RS18150	1191	hypothetical protein			2	2	2	0	0	1	1	1	0	1	0	1	12.1	21.153	2223300	0	0	558710	0	1460900	0	185970	0	17705	222330	0	0	55871	0	0	0.000127927	1	0	0	0	146090	0	0	0.000305844	0	1	0	0	18597
P161_RS0106155	P161_RS0106155	1192	3-methyl-2-oxobutanoate hydroxymethyltransferase			12	12	12	8	10	0	6	5	4	8	7	5	59.2	29.903	1715800000	137870000	172820000	0	293590000	100220000	140120000	384270000	320600000	166340000	171580000	13787000	17282000	0	0.0544696	0.0348619	0	2	0.0446657	0.0225259	29359000	10022000	14012000	0.0560955	0.0209814	0.0327074	3	0.0365948	0.0145964	38427000
P161_RS0106170	P161_RS0106170	1195	2-hydroxyacid dehydrogenase			12	12	12	8	10	2	2	2	2	3	1	0	39.1	34.988	42422000	7192600	30821000	1831600	649260	236550	1037900	653420	0	0	2232800	378560	1622200	96402	0.00149561	0.00327236	0.00022073	3	0.0016629	0.00125143	34172	12450	54628	6.52916e-05	2.60645e-05	0.000127515	3	7.2957e-05	4.17701e-05	34390
P161_RS0106175	P161_RS0106175	1196	DUF1801 domain-containing protein			5	5	5	3	3	0	0	0	0	1	0	1	42.4	17.646	39397000	8855300	25480000	0	0	0	0	3142400	0	1919000	6566100	1475900	4246700	0	0.00583098	0.0085666	0	2	0.00719879	0.00357259	0	0	0	0	0	0	0	0	0	523730
P161_RS0106180	P161_RS0106180	1197	VOC family protein			4	4	4	2	2	1	2	0	1	1	0	1	33.6	15.033	57893000	2600100	5213000	0	24879000	0	12918000	12282000	0	0	6432500	288900	579220	0	0.00114138	0.00116842	0	2	0.0011549	0.000544539	2764400	0	1435400	0.00528187	0	0.00335057	2	0.00431622	0.00218211	1364700
P161_RS0106190	P161_RS0106190	1199	methyltransferase domain-containing protein			8	8	8	6	8	0	2	3	1	3	3	2	37	32.319	38383000	3410700	17901000	0	1841900	2201900	0	2711000	2810800	7505500	2741700	243620	1278700	0	0.000962492	0.00257944	0	2	0.00177097	0.00106429	131570	157280	0	0.000251388	0.000329271	0	2	0.000290329	0.000140507	193640
P161_RS0106195	P161_RS0106195	1200	tRNA uridine-5-carboxymethylaminomethyl(34) synthesis enzyme MnmG			30	30	30	23	27	22	13	12	11	5	5	7	44.8	69.828	447770000	73261000	140190000	145950000	38975000	14962000	23417000	2898800	4690900	3423200	15440000	2526200	4834300	5032800	0.00998049	0.00975193	0.0115235	3	0.0104186	0.000786809	1344000	515940	807470	0.00256795	0.00108014	0.00188483	3	0.0018443	0.000608071	99958
P161_RS0106200	P161_RS0106200	1201	rRNA maturation RNase YbeY			2	2	2	2	1	0	0	0	0	0	0	0	8	16.124	1894600	1151900	742670	0	0	0	0	0	0	0	473640	287970	185670	0	0.00113771	0.00037454	0	2	0.000756125	0.000473415	0	0	0	0	0	0	0	0	0	0
P161_RS0106205	P161_RS0106205	1202	DUF4175 family protein			23	23	23	12	15	13	6	4	4	7	4	4	22.8	130.1	54514000	7812600	21323000	14291000	799710	1230500	637950	3969100	3857900	592430	939900	134700	367630	246400	0.000532172	0.000741597	0.000564177	3	0.000612649	9.21115e-05	13788	21215	10999	2.63444e-05	4.44143e-05	2.56743e-05	3	3.21443e-05	8.68049e-06	68432
P161_RS0106210	P161_RS0106210	1203	hypothetical protein			6	6	6	4	5	0	2	1	0	1	1	1	28.5	31.493	21476000	9809100	5112600	0	2338100	250080	0	1090300	2267700	608170	1652000	754550	393280	0	0.00298107	0.000793339	0	2	0.0018872	0.00126061	179850	19237	0	0.000343635	4.02733e-05	0	2	0.000191954	0.000153382	83868
P161_RS0106215	P161_RS0106215	1204	glutamate--tRNA ligase			29	29	29	20	26	23	15	16	12	16	14	12	56.5	58.855	2432700000	163960000	583430000	420750000	220290000	248160000	176870000	350720000	232570000	35933000	110580000	7452800	26520000	19125000	0.0294445	0.0534971	0.0437901	3	0.0422439	0.00988013	10013000	11280000	8039600	0.0191316	0.0236151	0.0187664	3	0.0205043	0.00220466	15942000
P161_RS0106220	P161_RS0106220	1205	hypothetical protein			13	13	13	11	10	7	6	5	2	2	0	3	57.5	21.945	535510000	158460000	75554000	72542000	99843000	97548000	498400	3841800	0	27220000	48683000	14406000	6868500	6594700	0.0569151	0.0138554	0.0150998	3	0.0286234	0.0200117	9076700	8868000	45309	0.0173426	0.0185655	0.000105762	3	0.0120046	0.00842856	349250
P161_RS0106225	P161_RS0106225	1206	SPFH domain-containing protein			17	17	17	16	15	1	9	8	10	11	10	9	43.2	34.433	1955100000	522970000	453290000	0	69356000	24452000	345650000	207170000	84767000	247430000	139650000	37355000	32378000	0	0.147582	0.0653141	0	2	0.106448	0.0603824	4954000	1746500	24689000	0.00946549	0.00365636	0.0576301	3	0.023584	0.0241908	14798000
P161_RS0106235	P161_RS0106235	1208	DUF2807 domain-containing protein			14	14	14	7	10	0	13	8	11	10	13	10	58.1	25.073	2363500000	51290000	133420000	0	692420000	150290000	316050000	283970000	455080000	280960000	157570000	3419300	8894400	0	0.0135089	0.0179421	0	2	0.0157255	0.00763081	46161000	10020000	21070000	0.0881987	0.0209772	0.0491824	3	0.0527861	0.0275611	18931000
P161_RS0106240	P161_RS0106240	1209	YbjQ family protein			4	4	4	2	3	1	1	1	0	1	0	1	33.6	11.843	32811000	2519900	5556700	2880200	1152900	345840	0	0	0	20356000	16406000	1260000	2778300	1440100	0.004978	0.00560449	0.00329737	3	0.00462662	0.000974098	576450	172920	0	0.00110141	0.000362014	0	2	0.000731711	0.000458362	0
P161_RS0106245	P161_RS0106245	1210	ribonuclease R			32	32	32	29	27	28	13	12	9	14	14	8	39.1	84.72	749240000	141800000	177360000	153240000	83302000	11434000	15199000	75662000	83461000	7786400	19211000	3635900	4547700	3929200	0.0143647	0.00917379	0.00899661	3	0.010845	0.00248983	2136000	293180	389710	0.0040812	0.000613782	0.000909677	3	0.00186822	0.00156947	1940000
P161_RS0106250	P161_RS0106250	1211	diacylglycerol kinase family lipid kinase			7	7	7	0	5	1	0	1	0	1	0	0	22.2	35.581	8364300	0	7079800	1284500	0	0	0	0	0	0	398300	0	337140	61165	0	0.000680091	0.000140048	2	0.00041007	0.000293217	0	0	0	0	0	0	0	0	0	0
P161_RS0106260	P161_RS0106260	1212	ribose 5-phosphate isomerase B			5	5	5	3	2	2	3	3	2	1	0	3	68.8	15.588	820680000	17285000	43246000	177860000	192440000	107050000	59321000	40331000	0	183140000	136780000	2880900	7207700	29644000	0.0113818	0.0145396	0.0678753	3	0.0312656	0.025919	32074000	17841000	9886800	0.061283	0.0373507	0.0230782	3	0.0405706	0.0157624	6721900
P161_RS0106265	P161_RS0106265	1213	GNAT family N-acetyltransferase			4	4	4	3	4	0	0	0	0	0	0	0	39	17.143	18330000	6697300	11633000	0	0	0	0	0	0	0	2036700	744140	1292600	0	0.00293994	0.00260748	0	2	0.00277371	0.00131457	0	0	0	0	0	0	0	0	0	0
P161_RS0106280	P161_RS0106280	1215	TonB-dependent receptor plug domain-containing protein	putative SusC-like		14	14	14	12	7	5	3	3	4	5	4	3	17.5	95.987	38283000	7915200	8995800	9913300	2134100	1655800	1305700	2146800	2588500	1628300	781290	161540	183590	202310	0.000638211	0.000370344	0.000463225	3	0.000490594	0.000111055	43552	33792	26646	8.32137e-05	7.07447e-05	6.21982e-05	3	7.20522e-05	8.62924e-06	43812
P161_RS0106285	P161_RS0106285	1216	FecR family protein			4	4	4	2	3	1	1	1	1	1	0	2	14.5	35.206	119960000	4487300	8085000	553940	12778000	1561500	7590500	27503000	0	57398000	8568400	320520	577500	39567	0.00126631	0.00116495	9.05958e-05	3	0.000840619	0.000531958	912720	111530	542180	0.00174391	0.000233492	0.00126558	3	0.00108099	0.000630289	1964500
P161_RS0106290	P161_RS0106290	1217	sigma-70 family RNA polymerase sigma factor	SF|Ecf		2	2	2	1	1	0	0	0	0	0	0	0	20.1	19.605	1482700	850180	632510	0	0	0	0	0	0	0	164740	94465	70279	0	0.000373212	0.000141769	0	2	0.00025749	0.000153822	0	0	0	0	0	0	0	0	0	0
P161_RS0106295	P161_RS0106295	1218	hypothetical protein			6	6	6	4	4	5	4	4	4	3	3	3	23.4	38.064	206850000	9773100	5853300	62009000	23993000	48666000	46356000	2364800	4850600	2984300	29550000	1396200	836180	8858400	0.0055161	0.00168677	0.0202829	3	0.00916193	0.00801761	3427500	6952200	6622200	0.00654884	0.0145547	0.0154578	3	0.0121871	0.00400387	337830
P161_RS0106300	P161_RS0106300	1219	hypothetical protein			7	7	7	4	7	1	4	4	3	4	4	3	27.9	28.263	746500000	17725000	118680000	833600	39756000	47507000	189890000	86822000	80102000	165190000	106640000	2532200	16954000	119090	0.0100042	0.0342002	0.000272678	3	0.0148257	0.0142643	5679400	6786700	27127000	0.0108515	0.0142082	0.0633209	3	0.0294602	0.0239823	12403000
P161_RS0106305	P161_RS0106305	1220	PorT family protein			9	9	9	8	8	6	6	6	4	5	1	7	51.8	21.833	623690000	38506000	61726000	88316000	83383000	98726000	21940000	73329000	0	157760000	47976000	2962000	4748200	6793500	0.0117022	0.00957824	0.0155549	3	0.0122785	0.00247377	6414100	7594300	1687700	0.0122553	0.0158989	0.0039395	3	0.0106979	0.00500506	5640700
P161_RS0106310	P161_RS0106310	1221	pseudouridine synthase			2	2	2	1	1	1	0	0	0	0	0	0	9.7	21.077	1020700	378050	387700	254930	0	0	0	0	0	0	102070	37805	38770	25493	0.00014936	7.82083e-05	5.83708e-05	3	9.53129e-05	3.90655e-05	0	0	0	0	0	0	0	0	0	0
P161_RS0106315	P161_RS0106315	1222	aldose 1-epimerase			14	14	14	6	9	0	3	1	5	4	3	3	51.1	30.544	303790000	8808400	60471000	0	17637000	17493000	102900000	57210000	649650	38624000	20253000	587230	4031400	0	0.00232002	0.00813229	0	2	0.00522616	0.00342051	1175800	1166200	6859700	0.00224657	0.00244148	0.0160122	3	0.00690008	0.00644372	3814000
P161_RS0106320	P161_RS0106320	1223	DNA damage-inducible protein D			13	13	13	9	10	0	3	1	2	3	3	2	49.1	32.532	344420000	27052000	40658000	0	64049000	603640	23162000	97733000	56473000	34692000	22961000	1803500	2710500	0	0.00712525	0.00546772	0	2	0.00629649	0.00304435	4269900	40242	1544100	0.00815839	8.4248e-05	0.0036043	3	0.00394898	0.00330525	6515500
P161_RS0106325	P161_RS0106325	1224	recombinase RecA			30	30	30	26	25	25	22	23	18	22	20	21	78.8	36.18	13402000000	951690000	2075800000	701130000	1851100000	1848900000	1278500000	2089900000	1589600000	1015600000	788360000	55982000	122110000	41243000	0.221173	0.246325	0.0944333	3	0.18731	0.0664719	108890000	108760000	75203000	0.208053	0.227693	0.175542	3	0.203763	0.0215056	122930000
P161_RS18155	P161_RS18155	1227	hypothetical protein			2	2	2	2	1	0	0	0	0	1	0	0	17.4	14.432	4290700	1870400	1932000	0	0	0	0	488240	0	0	858130	374080	386410	0	0.00147791	0.00077948	0	2	0.0011287	0.000603658	0	0	0	0	0	0	0	0	0	97649
P161_RS0106345	P161_RS0106345	1228	dUTP diphosphatase			8	8	8	5	6	4	6	5	4	4	1	7	46.2	15.373	456550000	43356000	39671000	15489000	61176000	48447000	59531000	63153000	763740	124960000	57069000	5419600	4958900	1936100	0.0214117	0.0100033	0.00443305	3	0.0119493	0.00706679	7647000	6055900	7441400	0.0146109	0.0126782	0.01737	3	0.0148864	0.00192529	7894200
P161_RS0106350	P161_RS0106350	1229	alpha/beta hydrolase	CAZyme, single-domain, contains CE1 domain		13	13	13	5	10	2	5	3	4	4	5	4	47.1	32.821	677450000	19176000	199910000	33672000	105540000	19550000	41385000	99624000	129300000	29284000	42340000	1198500	12495000	2104500	0.00473503	0.0252054	0.00481863	3	0.0115863	0.00963017	6596400	1221900	2586600	0.0126036	0.00255809	0.00603775	3	0.00706647	0.00416507	6226500
P161_RS0106355	P161_RS0106355	1230	NAD(P)H-dependent glycerol-3-phosphate dehydrogenase			12	12	12	8	11	0	2	0	0	0	0	0	46.8	37.231	280500000	26892000	200870000	0	52740000	0	0	0	0	0	17531000	1680800	12554000	0	0.00664049	0.0253244	0	2	0.0159824	0.0107213	3296300	0	0	0.00629816	0	0	1	0	0	0
P161_RS0106360	P161_RS0106360	1231	hypothetical protein			16	16	16	9	11	2	8	6	5	4	4	2	65.3	24.852	735390000	50683000	47889000	12783000	121990000	205530000	132050000	74772000	51715000	37981000	52528000	3620200	3420700	913070	0.0143027	0.00690036	0.00209064	3	0.00776455	0.00502285	8713400	14681000	9432100	0.0166485	0.0307352	0.0220168	3	0.0231335	0.00580482	5340800
P161_RS0106375	P161_RS0106375	1234	DUF547 domain-containing protein			7	7	7	5	5	2	1	1	2	1	1	1	27.5	29.852	44165000	21111000	15759000	1878100	1461100	877590	705070	416660	1309700	645880	3154600	1507900	1125700	134150	0.0059574	0.0022708	0.000307161	3	0.00284512	0.00234218	104360	62685	50362	0.000199398	0.000131233	0.000117557	3	0.000149396	3.57949e-05	29762
P161_RS0106380	P161_RS0106380	1235	glycosyltransferase	CAZyme, single-domain, contains GT2 domain		4	4	4	1	3	0	0	0	1	0	0	0	21.8	26.99	7075800	672520	2198100	0	0	0	4205100	0	0	0	589650	56043	183180	0	0.000221414	0.000369517	0	2	0.000295466	0.000151841	0	0	350430	0	0	0.000817988	1	0	0	0
P161_RS0106390	P161_RS0106390	1237	glycerol-3-phosphate dehydrogenase/oxidase			32	32	32	22	23	21	16	16	14	11	11	12	51.1	62.499	728600000	57147000	91332000	102200000	101800000	137900000	103930000	82934000	31820000	19524000	24287000	1904900	3044400	3406800	0.00752587	0.00614127	0.00780048	3	0.00715587	0.000726138	3393200	4596800	3464400	0.0064833	0.00962355	0.00808674	3	0.00806453	0.0012821	2764500
P161_RS0106395	P161_RS0106395	1238	hypothetical protein			13	13	13	12	9	8	8	8	6	5	0	4	66	16.259	977520000	109380000	127050000	137960000	152160000	156130000	118630000	173850000	0	2372700	122190000	13673000	15881000	17245000	0.0540192	0.0320357	0.0394855	3	0.0418468	0.0091287	19020000	19516000	14828000	0.036341	0.0408574	0.0346121	3	0.0372702	0.00263291	21731000
P161_RS0106400	P161_RS0106400	1239	2OG-Fe(II) oxygenase			4	4	4	2	4	0	0	0	0	0	0	0	15.8	22.759	5803100	1727300	4075700	0	0	0	0	0	0	0	644790	191930	452860	0	0.000758276	0.000913526	0	2	0.000835901	0.000399112	0	0	0	0	0	0	0	0	0	0
P161_RS0106405	P161_RS0106405	1240	pyridoxamine 5'-phosphate oxidase family protein			4	4	4	3	2	2	3	3	2	1	1	3	38.3	20.456	301230000	22532000	5079500	2676200	28155000	40467000	18006000	50998000	19053000	114260000	43033000	3218800	725640	382320	0.0127168	0.00146379	0.000875391	3	0.00501866	0.00544871	4022200	5781000	2572300	0.00768512	0.0121027	0.00600437	3	0.0085974	0.00257186	7285500
P161_RS0106410	P161_RS0106410	1241	nucleotidyltransferase			4	4	4	3	2	1	0	1	0	1	0	1	39.4	11.56	9762400	4485600	3267900	680990	0	0	0	915080	0	412850	1627100	747600	544650	113500	0.00295361	0.00109869	0.000259879	3	0.00143739	0.00112549	0	0	0	0	0	0	0	0	0	152510
P161_RS0106415	P161_RS0106415	1242	DUF86 domain-containing protein			7	7	7	7	7	3	2	1	0	2	0	2	35.6	14.139	30224000	9508700	15506000	1329700	365760	426220	0	1905000	0	1182700	5037300	1584800	2584300	221610	0.00626122	0.00521314	0.000507416	3	0.00399393	0.00250219	60959	71037	0	0.000116473	0.000148718	0	2	0.000132596	6.38773e-05	317510
P161_RS0106420	P161_RS0106420	1243	sodium:solute symporter			3	3	3	2	2	3	0	1	1	0	1	0	6.5	53.39	7360100	1226000	2394400	3338900	0	0	400830	0	0	0	525720	87569	171030	238500	0.000345967	0.000345008	0.000546089	3	0.000412355	9.45652e-05	0	0	28631	0	0	6.68316e-05	1	0	0	0
P161_RS0106425	P161_RS0106425	1244	hypothetical protein			2	2	2	2	1	1	0	1	0	1	0	1	15.9	15.394	151140000	7819600	1188200	0	0	24284000	0	59992000	0	57854000	25190000	1303300	198030	0	0.00514907	0.000399473	0	2	0.00277427	0.00233883	0	4047400	0	0	0.00847337	0	1	0	0	9998700
P161_RS0106435	P161_RS0106435	1246	phenylalanine--tRNA ligase subunit alpha			23	23	23	17	19	20	13	10	11	10	12	11	68.7	39.053	1362700000	225980000	442110000	332810000	62880000	47376000	42320000	32213000	86835000	90133000	61939000	10272000	20096000	15128000	0.0405825	0.0405384	0.0346383	3	0.0385864	0.0027918	2858200	2153500	1923600	0.00546109	0.00450842	0.00449014	3	0.00481989	0.000453462	1464200
P161_RS0106440	P161_RS0106440	1247	hypothetical protein			40	40	40	24	25	24	13	9	8	13	9	7	43.9	115.66	386180000	46966000	62464000	47901000	30109000	54083000	57058000	26396000	36934000	24266000	6330800	769940	1024000	785260	0.00304187	0.00206565	0.00179799	3	0.00230184	0.00053457	493590	886610	935380	0.00094309	0.00185615	0.0021834	3	0.00166088	0.000524843	432710
P161_RS0106445	P161_RS0106445	1248	NADP-specific glutamate dehydrogenase			29	29	29	25	29	24	19	19	19	21	23	21	76.9	48.778	9359900000	607200000	1691700000	1371700000	865200000	463000000	740020000	1232100000	1513700000	875290000	312000000	20240000	56390000	45722000	0.079964	0.113752	0.104689	3	0.0994683	0.0142793	28840000	15433000	24667000	0.0551039	0.0323095	0.0575787	3	0.0483307	0.0113737	41071000
P161_RS0106450	P161_RS0106450	1249	NADP-specific glutamate dehydrogenase			25	25	25	19	22	16	15	13	16	12	17	14	72.7	49.185	1349900000	120760000	306820000	261330000	126890000	71996000	121540000	90136000	157520000	92919000	58692000	5250500	13340000	11362000	0.0207436	0.0269099	0.0260154	3	0.0245563	0.00272059	5517100	3130300	5284200	0.0105414	0.00655339	0.0123346	3	0.00980979	0.0024162	3919000
P161_RS0106465	P161_RS0106465	1252	SulP family inorganic anion transporter			7	7	7	5	6	6	3	3	4	4	5	5	18.1	58.849	235820000	8312000	85227000	39021000	4025600	2045700	2730000	45734000	27558000	21167000	19652000	692660	7102300	3251700	0.00273656	0.014327	0.00744535	3	0.00816964	0.00475942	335470	170480	227500	0.000640974	0.000356906	0.00053104	3	0.00050964	0.000116954	3811100
P161_RS0106470	P161_RS0106470	1253	alpha/beta fold hydrolase	*		7	7	7	6	5	1	3	2	1	2	2	2	24.3	31.987	232510000	7193400	19667000	0	55434000	34616000	226350	36089000	49403000	29883000	14532000	449590	1229200	0	0.00177624	0.00247959	0	2	0.00212791	0.0010434	3464600	2163500	14147	0.00661973	0.00452936	3.30225e-05	3	0.00372737	0.00274816	2255600
P161_RS0106480	P161_RS0106480	1255	DNA polymerase IV			3	3	3	2	2	1	1	0	1	1	1	1	9.4	41.008	3467500	989590	1541200	295070	0	0	0	242970	255000	143620	144480	41233	64217	12295	0.000162903	0.000129541	2.81516e-05	3	0.000106865	5.73011e-05	0	0	0	0	0	0	0	0	0	10124
P161_RS0106490	P161_RS0106490	1257	FAD-binding oxidoreductase			5	5	5	2	4	2	3	1	1	1	0	1	17.9	41.63	13220000	1488900	3224600	1418600	5722700	230970	598670	363300	0	172460	600920	67676	146570	64481	0.000267374	0.000295666	0.000147641	3	0.000236894	6.41595e-05	260120	10499	27212	0.000497005	2.198e-05	6.35193e-05	3	0.000194168	0.000214808	16514
P161_RS0106495	P161_RS0106495	1258	NAD(P)/FAD-dependent oxidoreductase			8	8	8	4	5	5	4	4	2	1	3	0	24.1	42.693	22593000	1622200	4095500	8468600	2484800	2395100	1392800	0	2134000	0	1075900	77246	195020	403270	0.000305183	0.000393401	0.000923359	3	0.000540648	0.000273004	118320	114050	66324	0.000226071	0.000238767	0.000154816	3	0.000206552	3.69478e-05	0
P161_RS0106500	P161_RS0106500	1259	methyltransferase domain-containing protein			3	3	3	3	3	0	1	1	0	2	2	0	13.1	27.516	46231000	4401100	11412000	0	833910	451270	0	12067000	17065000	0	4202800	400100	1037500	0	0.00158071	0.00209288	0	2	0.0018368	0.000890763	75810	41024	0	0.000144848	8.58851e-05	0	2	0.000115367	5.94736e-05	1097000
P161_RS0106505	P161_RS0106505	1260	type III polyketide synthase			7	7	7	2	3	5	3	1	1	2	2	1	22.9	39.315	134840000	2393100	3316300	37350000	86992000	331650	518450	1435900	1881100	625260	12259000	217550	301480	3395500	0.000859495	0.000608156	0.00777461	3	0.00308075	0.00332064	7908400	30150	47131	0.0151104	6.312e-05	0.000110015	3	0.00509451	0.00708232	130540
P161_RS0106535	P161_RS0106535	1266	YceI family protein			4	4	4	2	2	0	1	1	1	0	0	2	25.3	20.26	66142000	5576900	5457400	0	32975000	0	19965000	0	0	2168300	7349200	619660	606380	0	0.00244815	0.00122321	0	2	0.00183568	0.000999452	3663900	0	2218300	0.00700052	0	0.00517805	2	0.00608928	0.00296537	0
P161_RS0106545	P161_RS0106545	1268	ABC transporter ATP-binding protein			8	8	8	4	5	0	3	0	1	1	1	1	26.3	35.949	25686000	3890700	21379000	0	66530	0	0	195040	92766	61868	1427000	216150	1187700	0	0.000853964	0.00239587	0	2	0.00162492	0.00099146	3696.1	0	0	7.06205e-06	0	0	1	0	0	10836
P161_RS0106550	P161_RS0106550	1269	hypothetical protein			4	4	4	2	1	1	2	1	1	0	0	0	25.6	19.314	4510700	1827400	1107400	807160	768660	0	0	0	0	0	563830	228430	138430	100900	0.00090248	0.000279246	0.000231029	3	0.000470918	0.000305794	96082	0	0	0.000183582	0	0	1	0	0	0
P161_RS0106555	P161_RS0106555	1270	thioredoxin family protein			9	9	9	7	6	2	2	2	3	1	3	2	53.3	22.673	67036000	13875000	26267000	2615600	1918400	763980	1717000	524280	8673600	10681000	6094200	1261300	2387900	237780	0.00498313	0.00481696	0.00054444	3	0.00344818	0.00205437	174400	69453	156090	0.000333222	0.000145402	0.000364352	3	0.000280992	9.6715e-05	47661
P161_RS0106560	P161_RS0106560	1271	NAD-dependent epimerase/dehydratase family protein			16	16	16	14	14	5	7	4	6	4	2	4	57.6	35.583	266790000	34263000	128270000	2406400	38418000	1921600	20171000	15645000	24375000	1314000	15693000	2015500	7545400	141550	0.00796282	0.0152209	0.000324104	3	0.00783593	0.00608224	2259900	113040	1186500	0.00431794	0.000236653	0.00276958	3	0.00244139	0.00168226	920270
P161_RS0106565	P161_RS0106565	1272	hypothetical protein			8	8	8	7	7	1	6	4	3	1	5	0	41.5	23.716	99833000	9524100	31945000	239440	18655000	34607000	870210	446650	3545400	0	6655500	634940	2129700	15962	0.00250852	0.00429611	3.65479e-05	3	0.00228039	0.00174642	1243700	2307100	58014	0.00237631	0.00482999	0.000135419	3	0.00244724	0.00191721	29777
P161_RS0106575	P161_RS0106575	1274	bifunctional riboflavin kinase/FAD synthetase			9	9	9	6	6	5	2	4	4	2	4	1	25.5	35.297	37137000	3413600	8109200	5308800	1491500	5608700	2666100	5859900	4545800	133760	2321100	213350	506830	331800	0.000842902	0.0010224	0.000759716	3	0.000875005	0.000109615	93221	350540	166630	0.000178115	0.000733867	0.000388954	3	0.000433646	0.000229075	366240
P161_RS0106580	P161_RS0106580	1275	TonB-dependent receptor	SusC-like		60	60	60	50	51	53	48	47	44	47	49	50	83.2	99.567	59650000000	3197000000	5428200000	4496800000	8066400000	7179500000	6908100000	8487700000	9343100000	6543100000	1387200000	74349000	126240000	104580000	0.293737	0.254656	0.239455	3	0.262616	0.0228645	187590000	166960000	160650000	0.358424	0.349536	0.374996	3	0.360985	0.0105504	197390000
P161_RS0106585	P161_RS0106585	1276	lipase			14	14	14	10	12	14	12	12	12	12	12	12	53.7	53.314	42507000000	1942600000	5734000000	5569200000	7278900000	4752800000	5013800000	4638500000	5261400000	2315500000	3864200000	176600000	521280000	506290000	0.69771	1.05154	1.15924	3	0.969499	0.197149	661710000	432070000	455800000	1.26431	0.904553	1.06395	3	1.0776	0.147189	421680000
P161_RS0106590	P161_RS0106590	1277	cysteine desulfurase			10	10	10	6	4	4	3	3	4	1	3	3	31.7	44.568	201980000	29992000	38651000	62706000	7506100	29569000	8678900	15901000	6047400	2926100	11881000	1764200	2273600	3688600	0.00696999	0.00458639	0.00844572	3	0.00666736	0.00159003	441540	1739300	510520	0.00084364	0.00364128	0.00119168	3	0.0018922	0.00124492	935360
P161_RS0106595	P161_RS0106595	1278	serine hydrolase			11	11	11	6	9	8	3	2	2	5	5	4	27.7	50.297	319200000	7077300	83668000	74463000	11519000	4809000	3275200	78891000	53682000	1814500	13300000	294890	3486200	3102600	0.00116505	0.00703249	0.00710396	3	0.0051005	0.00278294	479970	200370	136470	0.000917067	0.000419481	0.000318554	3	0.000551701	0.000261618	3287100
P161_RS0106610	P161_RS0106610	1281	Fe-S cluster assembly protein SufD			27	27	27	20	23	26	16	14	14	7	5	7	64.5	49.195	1857500000	112360000	396130000	461530000	340800000	240370000	118170000	106070000	63544000	18524000	74299000	4494300	15845000	18461000	0.017756	0.0319631	0.0422698	3	0.030663	0.0100498	13632000	9614600	4726700	0.0260463	0.0201285	0.0110333	3	0.0190694	0.00617465	4242700
P161_RS0106615	P161_RS0106615	1282	Fe-S cluster assembly ATPase SufC			24	24	24	19	23	3	14	12	9	10	11	5	73.1	27.539	2740800000	213950000	1135900000	20361000	236040000	263280000	277150000	343550000	241490000	9063400	171300000	13372000	70993000	1272500	0.05283	0.14321	0.00291362	3	0.0663178	0.0580642	14753000	16455000	17322000	0.0281882	0.0344491	0.0404337	3	0.034357	0.00499964	21472000
P161_RS0106620	P161_RS0106620	1283	N-acyl homoserine lactonase family protein			13	13	13	10	11	11	5	6	4	4	6	4	44.4	31.796	1685100000	63176000	148520000	121070000	139860000	343470000	92312000	303520000	378940000	94283000	153200000	5743300	13501000	11006000	0.0226906	0.0272347	0.0252002	3	0.0250418	0.00185851	12714000	31225000	8392000	0.0242923	0.0653706	0.0195889	3	0.0364173	0.0205629	27593000
P161_RS0106625	P161_RS0106625	1284	Fe-S cluster assembly protein SufB			30	30	30	22	26	28	19	18	16	12	12	11	69.6	53.841	2572200000	97952000	452980000	708260000	458290000	383690000	123320000	144540000	150680000	52496000	95267000	3627800	16777000	26232000	0.0143327	0.0338432	0.0600629	3	0.0360796	0.0187361	16974000	14211000	4567400	0.0324318	0.0297512	0.0106614	3	0.0242815	0.00969281	5353500
P161_RS0106635	P161_RS0106635	1286	iron-sulfur cluster assembly accessory protein			2	2	2	2	1	2	1	1	1	1	0	1	22	11.965	14919000	5148600	5774300	2776000	801550	418470	0	0	0	0	2486500	858100	962380	462670	0.00339018	0.00194135	0.00105937	3	0.0021303	0.000960883	133590	69745	0	0.000255247	0.000146013	0	2	0.00020063	0.000104564	0
P161_RS0106645	P161_RS0106645	1288	aminopeptidase P family protein			16	16	16	9	14	11	6	3	4	4	4	4	50.5	49.445	835350000	31400000	187120000	50316000	135210000	33635000	112040000	35360000	178240000	72030000	46408000	1744400	10395000	2795400	0.00689176	0.0209692	0.00640057	3	0.0114205	0.00675491	7511900	1868600	6224500	0.0143528	0.00391198	0.0145295	3	0.0109314	0.00496402	1964400
P161_RS0106650	P161_RS0106650	1289	sugar kinase			6	6	6	4	4	4	2	2	2	3	3	3	21.9	37.475	26527000	2627000	8481200	2759900	4252200	1052300	1239600	3750800	1796700	567360	1473700	145940	471180	153330	0.000576579	0.000950481	0.000351077	3	0.000626046	0.000247193	236230	58459	68869	0.000451359	0.000122386	0.000160757	3	0.000244834	0.000146873	208380
P161_RS0106655	P161_RS0106655	1290	alpha/beta hydrolase			5	5	5	2	3	0	2	0	0	2	0	0	28.8	30.008	5125700	887100	2908700	0	1307200	0	0	22699	0	0	394280	68238	223740	0	0.000269594	0.000451336	0	2	0.000360465	0.000185417	100560	0	0	0.000192138	0	0	1	0	0	1746.1
P161_RS0106660	P161_RS0106660	1291	hypothetical protein			14	14	14	9	8	0	8	4	5	8	12	10	52.3	24.689	1966100000	2318000	38275000	0	31609000	112380000	87758000	451140000	719270000	523310000	163840000	193170	3189600	0	0.000763175	0.00643418	0	2	0.00359868	0.00287018	2634100	9365100	7313200	0.00503291	0.0196061	0.0170708	3	0.0139033	0.00635713	37595000
P161_RS0106665	P161_RS0106665	1292	Crp/Fnr family transcriptional regulator			4	4	4	3	3	1	1	1	1	2	4	3	20.1	23.042	83408000	1604600	2862200	0	686310	279960	308220	675610	55058000	21933000	7582600	145870	260200	0	0.000576302	0.000524885	0	2	0.000550594	0.0002604	62392	25451	28020	0.000119211	5.32825e-05	6.54054e-05	3	7.92996e-05	2.86522e-05	61419
P161_RS0106675	P161_RS0106675	1294	serine hydrolase			22	22	22	11	15	15	12	9	8	12	10	9	42.2	58.585	1141500000	18181000	108850000	144590000	190670000	112630000	103760000	270660000	159480000	32651000	45659000	727230	4354200	5783400	0.00287314	0.00878345	0.0132421	3	0.00829957	0.00424693	7626600	4505200	4150500	0.014572	0.00943179	0.00968826	3	0.0112307	0.00236497	10827000
P161_RS0106685	P161_RS0106685	1296	alpha/beta hydrolase	*		8	8	8	5	5	0	3	1	0	2	2	1	35.2	29.203	14627000	2535300	8602800	0	1881700	0	0	561360	813440	232500	1044800	181090	614480	0	0.000715449	0.00123955	0	2	0.0009775	0.000508051	134410	0	0	0.000256814	0	0	1	0	0	40097
P161_RS0106695	P161_RS0106695	1298	thiamine-phosphate kinase			11	11	11	8	7	8	4	3	3	3	4	3	30.4	38.288	203430000	23443000	62612000	70854000	21382000	9579200	4729900	1325600	2984600	6521300	15649000	1803300	4816300	5450300	0.00712446	0.00971562	0.0124794	3	0.00977318	0.00218654	1644800	736860	363840	0.00314268	0.00154264	0.00084929	3	0.00184487	0.000960352	101970
P161_RS0106700	P161_RS0106700	1299	choice-of-anchor B family protein			9	9	9	6	8	9	5	4	4	5	4	4	27.3	46.052	576270000	4983800	51400000	76826000	57375000	125190000	32731000	83081000	99804000	44877000	57627000	498380	5140000	7682600	0.001969	0.0103686	0.0175907	3	0.0099761	0.00638357	5737500	12519000	3273100	0.0109625	0.0262089	0.0076402	3	0.0149372	0.0080849	8308100
P161_RS0106705	P161_RS0106705	1300	hypothetical protein			14	14	14	9	7	3	5	3	0	5	4	4	39	47.727	28953000	4242600	11666000	2514300	3673100	3951000	0	1340100	909600	656220	1206400	176780	486090	104760	0.000698421	0.000980558	0.000239867	3	0.000639616	0.000305232	153050	164620	0	0.000292429	0.000344637	0	2	0.000318533	0.000151663	55836
P161_RS0106710	P161_RS0106710	1301	hypothetical protein			3	3	3	2	3	1	2	1	1	2	2	1	14.9	28.716	21662000	1169000	7130300	3023800	2730100	136760	94818	3373100	3789000	215340	1969300	106270	648210	274890	0.000419851	0.00130759	0.00062941	3	0.000785618	0.000378877	248190	12433	8619.8	0.000474211	2.60289e-05	2.01207e-05	3	0.000173453	0.000212681	306650
P161_RS0106715	P161_RS0106715	1302	DEAD/DEAH box helicase			11	11	11	9	10	8	4	5	3	4	3	2	31.7	48.101	56276000	8139600	19330000	12647000	5453800	3958500	2140100	2851900	1631800	122760	2446800	353900	840450	549890	0.00139819	0.00169539	0.00125907	3	0.00145088	0.00018198	237120	172110	93047	0.000453059	0.000360318	0.000217194	3	0.000343524	9.70211e-05	123990
P161_RS0106725	P161_RS0106725	1304	glycosyl hydrolase	CAZyme, multi-domain, contains five GH74 domains		46	46	46	36	37	35	23	21	22	28	26	23	55.2	105.51	10429000000	342420000	990590000	820960000	1337600000	1428500000	1206800000	1607900000	1854400000	839380000	254350000	8351600	24161000	20024000	0.0329954	0.0487384	0.0458486	3	0.0425275	0.00684265	32623000	34841000	29435000	0.062332	0.0729408	0.0687084	3	0.0679937	0.00436042	39217000
P161_RS0106730	P161_RS0106730	1305	hypothetical protein			7	7	7	4	3	4	3	4	2	1	5	2	40.9	23.02	19731000	7529200	5884400	3400100	582440	1421400	0	0	864320	49389	1644300	627430	490370	283340	0.00247885	0.000989192	0.000648758	3	0.00137227	0.000794718	48537	118450	0	9.27384e-05	0.000247979	0	2	0.000170359	0.000102303	0
P161_RS0106735	P161_RS0106735	1306	succinate dehydrogenase cytochrome b subunit			4	4	4	3	4	2	2	2	1	2	3	3	19.6	25.518	64403000	2709400	4949200	2659400	2632500	753350	334300	4410700	20174000	25781000	10734000	451570	824860	443230	0.00178406	0.00166394	0.00101486	3	0.00148762	0.000337871	438750	125560	55716	0.000838309	0.000262864	0.000130055	3	0.000410409	0.00030739	735120
P161_RS0106740	P161_RS0106740	1307	fumarate reductase/succinate dehydrogenase flavoprotein subunit			47	47	47	35	34	38	28	31	27	27	31	33	62.6	74.123	14788000000	676540000	1113300000	1357100000	2023600000	2275300000	2143900000	1911000000	1582200000	1704800000	462120000	21142000	34790000	42410000	0.0835277	0.0701797	0.0971054	3	0.0836042	0.0109925	63239000	71104000	66997000	0.120829	0.148859	0.156387	3	0.142025	0.0152996	59718000
P161_RS0106750	P161_RS0106750	1309	succinate dehydrogenase/fumarate reductase iron-sulfur subunit			11	11	11	10	11	4	11	9	9	10	10	10	57.7	26.846	3571300000	37187000	141820000	3851900	545740000	251560000	487480000	704230000	688860000	710520000	297600000	3098900	11819000	320990	0.0122431	0.0238417	0.000734965	3	0.0122733	0.00943332	45479000	20963000	40624000	0.0868956	0.0438867	0.0948262	3	0.0752028	0.0223793	58685000
P161_RS18170	P161_RS18170	1310	helix-turn-helix transcriptional regulator	TR|Xre		2	2	2	2	2	2	2	2	2	1	0	2	20.6	11.705	6491000	1099800	1509300	1751800	783450	631480	247920	0	0	467190	811380	137480	188670	218980	0.000543155	0.000380592	0.000501394	3	0.000475047	6.89314e-05	97932	78935	30990	0.000187116	0.000165253	7.23381e-05	3	0.000141569	4.97608e-05	0
P161_RS19040	P161_RS19040	1312	GLPGLI family protein			9	9	9	5	8	1	7	2	2	0	0	0	32.7	26.257	92400000	8598600	62228000	473130	19834000	528180	737220	0	0	0	7700000	716550	5185700	39428	0.00283094	0.0104608	9.02775e-05	3	0.00446067	0.00438777	1652900	44015	61435	0.00315816	9.21469e-05	0.000143404	3	0.00113124	0.0014334	0
P161_RS19045	P161_RS19045	1314	GLPGLI family protein			8	8	8	4	7	0	1	0	0	1	0	0	30.5	28.069	19132000	4776400	13804000	0	552430	0	0	0	0	0	1366600	341170	985970	0	0.00134789	0.00198893	0	2	0.00166841	0.000828895	39459	0	0	7.53933e-05	0	0	1	0	0	0
P161_RS0106785	P161_RS0106785	1315	hypothetical protein	putative SusC-like		13	13	13	7	9	6	3	3	3	2	3	3	19.4	101.06	39408000	5673500	11328000	8597400	1876300	1074000	2758700	2465200	994080	4641200	838470	120710	241020	182920	0.0004769	0.000486194	0.000418828	3	0.000460641	2.98084e-05	39921	22852	58695	7.62761e-05	4.78414e-05	0.000137008	3	8.70419e-05	3.71897e-05	52451
P161_RS0106790	P161_RS0106790	1316	ribonuclease H			5	5	5	3	4	0	2	1	0	1	1	2	21.7	24.197	5509200	2302200	2339600	0	367740	307590	0	0	0	192020	423780	177090	179970	0	0.000699646	0.000363042	0	2	0.000531344	0.000285697	28288	23660	0	5.40492e-05	4.9533e-05	0	2	5.17911e-05	2.44841e-05	0
P161_RS0106795	P161_RS0106795	1317	phosphoribosylglycinamide formyltransferase			6	6	6	4	4	3	2	2	2	2	4	3	38.4	21.633	30225000	4327700	7889200	3452500	3486500	1363200	1622800	1941300	4146000	1996100	2518800	360640	657430	287710	0.00142481	0.00132619	0.000658764	3	0.00113659	0.000340264	290550	113600	135230	0.000555147	0.000237825	0.000315659	3	0.000369544	0.000135033	161780
P161_RS0106805	P161_RS0106805	1319	beta-ketoacyl-ACP synthase II			20	20	20	14	16	13	12	7	13	12	15	13	84.7	44.113	7938400000	423180000	1088800000	860610000	948300000	253610000	1058100000	698700000	1709900000	897140000	529230000	28212000	72588000	57374000	0.11146	0.146427	0.131368	3	0.129752	0.0143211	63220000	16908000	70542000	0.120793	0.0353975	0.164662	3	0.106951	0.053672	46580000
P161_RS0106810	P161_RS0106810	1320	ribonuclease III			8	8	8	3	6	1	4	4	2	4	4	1	43.7	28.143	185900000	5726500	90463000	7225400	31269000	30889000	12763000	2752800	3410600	1396700	14300000	440500	6958700	555800	0.00174032	0.0140373	0.0012726	3	0.00568342	0.0059102	2405300	2376100	981760	0.00459575	0.00497444	0.00229166	3	0.00395395	0.00118554	211750
P161_RS0106815	P161_RS0106815	1321	IPExxxVDY family protein			2	2	2	1	0	2	0	0	0	0	0	0	15.4	18.12	1901700	557750	0	1344000	0	0	0	0	0	0	211300	61972	0	149330	0.000244839	0	0.000341918	2	0.000293378	0.000143867	0	0	0	0	0	0	0	0	0	0
P161_RS0106820	P161_RS0106820	1322	pyruvate kinase			47	47	47	33	38	37	33	31	31	31	30	34	74.3	52.86	35281000000	1090100000	3036900000	3773500000	3561100000	4799500000	3792500000	6573900000	5748700000	2904400000	1603700000	49550000	138040000	171520000	0.195762	0.278459	0.392726	3	0.288982	0.0807539	161870000	218160000	172390000	0.309281	0.456725	0.4024	3	0.389469	0.0608844	298810000
P161_RS0106830	P161_RS0106830	1323	M28 family peptidase			8	8	8	3	6	6	1	2	3	2	1	1	13.1	86.46	279200000	14891000	102940000	8031500	40417000	30575000	12419000	18277000	28273000	23376000	9006400	480360	3320600	259080	0.0018978	0.00669844	0.00059321	3	0.00306315	0.00262513	1303800	986300	400610	0.00249114	0.00206485	0.00093512	3	0.00183037	0.000656524	589570
P161_RS0106835	P161_RS0106835	1324	CBS domain-containing protein			11	11	11	10	8	6	10	9	5	7	0	7	56.1	17.521	1048300000	182230000	70897000	99995000	167290000	154050000	62902000	176730000	0	134190000	116480000	20248000	7877400	11111000	0.0799957	0.0158906	0.0254406	3	0.0404423	0.0282389	18588000	17117000	6989100	0.0355156	0.035835	0.0163142	3	0.0292216	0.00912783	19637000
P161_RS0106860	P161_RS0106860	1329	single-stranded DNA-binding protein			2	2	2	0	2	0	0	0	0	0	0	0	21.6	12.472	1585000	0	1585000	0	0	0	0	0	0	0	264160	0	264160	0	0	0.000532873	0	1	0	0	0	0	0	0	0	0	0	0	0	0
P161_RS0106865	P161_RS0106865	1330	DGQHR domain-containing protein			30	30	30	21	25	23	11	9	9	15	13	12	66.5	52.327	831810000	62887000	224370000	118240000	79904000	10819000	5538400	158110000	89338000	82612000	33272000	2515500	8974600	4729500	0.00993822	0.0181039	0.010829	3	0.0129571	0.00365749	3196200	432780	221540	0.0061069	0.000906039	0.000517128	3	0.00251002	0.00254833	6324400
P161_RS0106870	P161_RS0106870	1331	hypothetical protein			5	5	5	3	2	3	1	1	1	1	2	0	28.9	21.285	20256000	2882400	1840800	3319600	197570	84806	96794	0	11834000	0	2893700	411770	262970	474220	0.00162682	0.000530473	0.00108581	3	0.00108103	0.000447594	28225	12115	13828	5.39288e-05	2.53632e-05	3.22779e-05	3	3.71899e-05	1.21681e-05	0
P161_RS0106875	P161_RS0106875	1332	hypothetical protein			2	2	2	2	2	0	0	0	0	0	0	0	6.9	37.575	12189000	1981200	10208000	0	0	0	0	0	0	0	870660	141520	729150	0	0.000559116	0.00147087	0	2	0.00101499	0.000606204	0	0	0	0	0	0	0	0	0	0
P161_RS0106880	P161_RS0106880	1333	hypothetical protein			26	26	26	17	19	18	15	14	15	14	13	16	56.5	50.283	1301300000	48044000	192880000	174540000	263440000	67554000	116080000	147770000	192200000	98801000	46475000	1715900	6888500	6233700	0.00677917	0.0138957	0.0142732	3	0.0116494	0.00344719	9408500	2412600	4145800	0.0179766	0.00505086	0.00967729	3	0.0109016	0.00534745	5277400
P161_RS0106885	P161_RS0106885	1334	DndE family protein			3	3	3	2	2	3	0	0	0	0	0	0	18.2	14.963	6897300	3735500	2031000	1130800	0	0	0	0	0	0	985320	533640	290140	161540	0.0021083	0.000585281	0.000369875	3	0.00102115	0.000773744	0	0	0	0	0	0	0	0	0	0
P161_RS0106890	P161_RS0106890	1335	DNA sulfur modification protein DndD			21	21	21	12	15	10	2	1	2	2	1	1	30.5	81.162	69013000	8891600	31315000	21565000	1778800	722640	2997200	1322600	114060	306310	1725300	222290	782870	539120	0.000878222	0.00157923	0.00123441	3	0.00123062	0.0002862	44470	18066	74929	8.49677e-05	3.78218e-05	0.000174902	3	9.92306e-05	5.68644e-05	33065
P161_RS0106895	P161_RS0106895	1336	DNA phosphorothioation system sulfurtransferase DndC			9	9	9	4	8	2	0	0	0	0	1	1	19.4	52.292	35703000	3379400	30540000	1402900	0	0	0	0	199780	180720	1428100	135170	1221600	56115	0.000534029	0.00246426	0.000128485	3	0.00104226	0.00101904	0	0	0	0	0	0	0	0	0	0
P161_RS0106900	P161_RS0106900	1337	hypothetical protein			5	5	5	4	4	5	3	3	1	2	2	2	20.9	24.461	238680000	17118000	26673000	7497100	25437000	30097000	1225000	70612000	30944000	29079000	21698000	1556200	2424800	681550	0.00614822	0.00489139	0.00156053	3	0.00420005	0.00193566	2312400	2736100	111360	0.00441825	0.00572812	0.000259941	3	0.00346877	0.00233115	6419300
P161_RS0106905	P161_RS0106905	1338	NAD(P)/FAD-dependent oxidoreductase			8	8	8	8	6	3	1	1	1	1	1	1	23.3	42.039	19153000	5817400	10222000	1736400	340820	200670	487820	126350	84051	137340	1064100	323190	567900	96467	0.00127686	0.00114559	0.000220879	3	0.000881108	0.000469918	18934	11148	27101	3.61767e-05	2.33387e-05	6.32602e-05	3	4.09252e-05	1.66402e-05	7019.3
P161_RS0106910	P161_RS0106910	1339	hypothetical protein			46	46	46	37	39	41	36	32	32	31	31	35	63.2	79.566	9587700000	397840000	603030000	959850000	1661900000	1309300000	1044800000	1582900000	979620000	1048400000	355100000	14735000	22335000	35550000	0.0582149	0.045055	0.0813981	3	0.061556	0.0150239	61551000	48493000	38697000	0.117604	0.101522	0.0903281	3	0.103151	0.0111948	58627000
P161_RS0106915	P161_RS0106915	1340	hypothetical protein			17	17	17	9	12	7	9	8	8	10	16	14	53.6	44.441	4481100000	63009000	141150000	141480000	371530000	173330000	396160000	629900000	1498000000	1066500000	224050000	3150400	7057700	7073900	0.0124466	0.014237	0.016197	3	0.0142935	0.00153161	18577000	8666600	19808000	0.0354946	0.0181438	0.0462366	3	0.0332917	0.0115741	31495000
P161_RS0106950	P161_RS0106950	1347	ATP-dependent helicase			4	4	4	0	2	1	2	2	1	1	1	0	9.7	66.487	76414000	0	69659000	0	358280	792620	749290	4855400	0	0	2635000	0	2402000	0	0	0.0048454	0	1	0	0	12354	27332	25838	2.36045e-05	5.72205e-05	6.03121e-05	3	4.70457e-05	1.66234e-05	167430
P161_RS18205	P161_RS18205	1348	AAA family ATPase			13	13	13	5	9	6	5	2	2	4	4	3	22.4	77.372	43025000	2827400	11928000	7349600	2126500	3317400	784500	12494000	1772700	424290	1344500	88355	372760	229680	0.000349072	0.000751945	0.000525894	3	0.000542304	0.000164881	66452	103670	24516	0.000126968	0.000217037	5.72262e-05	3	0.000133744	6.5418e-05	390440
P161_RS0107010	P161_RS0107010	1359	hypothetical protein			8	8	8	7	6	4	1	0	0	0	0	0	15.1	75.045	22490000	3904800	10059000	6887300	1638200	0	0	0	0	0	681510	118330	304830	208710	0.000467497	0.000614914	0.000477879	3	0.000520097	6.71798e-05	49644	0	0	9.48536e-05	0	0	1	0	0	0
P161_RS18215	P161_RS18215	1360	hypothetical protein			15	15	15	15	13	10	3	3	2	3	1	2	22.2	68.464	72029000	16576000	26982000	21523000	2030900	2443200	1121400	590390	365790	396490	1846900	425030	691840	551880	0.00167921	0.0013956	0.00126363	3	0.00144615	0.000173382	52075	62645	28753	9.94984e-05	0.000131149	6.71164e-05	3	9.92547e-05	2.61419e-05	15138
P161_RS0107020	P161_RS0107020	1361	hypothetical protein			14	14	14	13	12	11	7	6	8	4	8	6	40.5	42.415	60131000	10817000	13026000	14325000	4940500	4419600	3157200	617320	6903000	1925300	2863400	515090	620290	682140	0.00203501	0.00125127	0.00156188	3	0.00161606	0.000322246	235260	210460	150340	0.000449505	0.000440605	0.00035093	3	0.00041368	4.45197e-05	29396
P161_RS0107025	P161_RS0107025	1362	hypothetical protein			9	9	9	6	5	6	3	3	2	1	0	0	25.1	45.722	19889000	3718000	7368900	5573600	1204400	1362400	388510	273640	0	0	864760	161650	320390	242330	0.000638646	0.000646302	0.000554858	3	0.000613269	4.14206e-05	52364	59235	16892	0.000100051	0.00012401	3.943e-05	3	8.78303e-05	3.55946e-05	11897
P161_RS0107035	P161_RS0107035	1363	tetratricopeptide repeat protein			5	5	5	3	3	1	2	3	0	2	2	1	9.5	65.396	12702000	1390700	1734700	717450	1111500	5293200	0	1456400	515600	482140	396920	43458	54208	22420	0.000171694	0.00010935	5.13346e-05	3	0.000110793	4.91469e-05	34733	165410	0	6.63635e-05	0.000346291	0	2	0.000206327	0.000150067	45512
P161_RS0107040	P161_RS0107040	1364	RHS repeat protein			24	24	24	15	14	16	9	10	9	12	10	9	21.1	150.34	523590000	15047000	32780000	40367000	30770000	64876000	47758000	57841000	146500000	87658000	8181200	235110	512180	630740	0.000928871	0.00103319	0.00144419	3	0.00113542	0.000222452	480780	1013700	746220	0.000918614	0.00212221	0.00174186	3	0.00159423	0.000502334	903770
P161_RS0107055	P161_RS0107055	1367	signal peptidase I			11	11	11	5	6	7	1	2	2	0	0	0	31.7	40.566	34722000	2461200	9780300	14893000	895040	5167400	1525100	0	0	0	1736100	123060	489020	744650	0.000486185	0.000986469	0.00170501	3	0.00105922	0.000500236	44752	258370	76254	8.55065e-05	0.000540906	0.000177995	3	0.000268136	0.000196539	0
P161_RS0107060;P161_RS19350	P161_RS0107060	1368	efflux RND transporter permease subunit			14	14	14	9	10	9	4	3	1	6	5	3	12.9	123.02	46713000	8676200	12813000	11837000	2841400	643330	0	6650800	2349700	901200	915950	170120	251240	232110	0.000672109	0.00050681	0.000531458	3	0.000570126	7.28116e-05	55713	12614	0	0.000106449	2.64078e-05	0	2	6.64286e-05	4.52592e-05	130410
P161_RS0107065	P161_RS0107065	1369	hypothetical protein			2	2	2	0	0	0	1	1	0	0	0	0	41.2	9.8408	663110	0	0	0	202530	460580	0	0	0	0	331550	0	0	0	0	0	0	0	0	0	101260	230290	0	0.000193475	0.00048212	0	2	0.000337797	0.000198099	0
P161_RS0107070	P161_RS0107070	1370	6-bladed beta-propeller			46	46	46	38	41	37	39	35	38	36	40	41	77	49.506	20788000000	762200000	2221200000	2129000000	2341000000	811500000	2175500000	3604900000	4305800000	2436500000	831510000	30488000	88847000	85162000	0.120452	0.179225	0.194994	3	0.16489	0.0320754	93640000	32460000	87019000	0.178916	0.0679561	0.203123	3	0.149998	0.0588484	144200000
P161_RS0107075	P161_RS0107075	1371	hypothetical protein			16	16	16	9	12	7	7	8	7	4	2	4	73.9	22.35	744850000	64142000	151210000	121260000	144000000	146120000	82524000	24648000	471380	10487000	74485000	6414200	15121000	12126000	0.0253412	0.0305026	0.0277647	3	0.0278695	0.00210846	14400000	14612000	8252400	0.0275137	0.0305907	0.0192631	3	0.0257892	0.00478256	2464800
P161_RS0107090	P161_RS0107090	1373	hypothetical protein			2	2	2	1	2	1	2	1	1	1	1	1	48.4	6.7627	137870000	35318000	38691000	18939000	26399000	8160400	189410	1973100	129840	8073500	68936000	17659000	19345000	9469600	0.069767	0.0390234	0.0216824	3	0.0434909	0.019883	13199000	4080200	94706	0.025219	0.00854203	0.000221067	3	0.0113274	0.0103937	986530
P161_RS0107100	P161_RS0107100	1375	hypothetical protein			34	34	34	30	27	25	22	21	21	21	23	20	67.2	43.294	12664000000	482670000	1040800000	1188000000	1774400000	1046200000	1594000000	1866900000	2573800000	1097300000	550610000	20985000	45254000	51650000	0.0829074	0.091288	0.118262	3	0.0974858	0.0150841	77148000	45487000	69306000	0.147405	0.0952285	0.161777	3	0.134803	0.0285921	81168000
P161_RS0107110	P161_RS0107110	1376	efflux RND transporter periplasmic adaptor subunit			27	27	27	17	20	23	13	15	13	8	8	6	60.6	40.257	2341400000	58340000	193020000	232550000	269180000	462150000	309080000	312870000	413650000	90572000	137730000	3431700	11354000	13679000	0.0135579	0.0229037	0.0313205	3	0.0225941	0.00725486	15834000	27185000	18181000	0.0302536	0.0569127	0.0424388	3	0.0432017	0.0108969	18404000
P161_RS0107115	P161_RS0107115	1377	efflux RND transporter permease subunit			31	31	31	26	23	21	14	12	8	12	12	11	32.7	113.26	459070000	80933000	97776000	59422000	56043000	25282000	16406000	81123000	23080000	19003000	10676000	1882200	2273900	1381900	0.00743618	0.00458699	0.00316411	3	0.00506243	0.00177617	1303300	587950	381530	0.00249018	0.00123089	0.000890583	3	0.00153722	0.00068802	1886600
P161_RS0107120	P161_RS0107120	1378	TolC family protein			22	22	22	12	15	8	7	8	7	8	13	13	49.4	51.897	651230000	22828000	152690000	22157000	99038000	13990000	76589000	16996000	149720000	97228000	29602000	1037600	6940500	1007100	0.00409934	0.0140006	0.00230594	3	0.00680197	0.00514261	4501700	635930	3481300	0.00860129	0.00133134	0.00812619	3	0.00601961	0.00332077	772540
P161_RS0107125	P161_RS0107125	1379	response regulator transcription factor	RR|CheY		14	14	14	6	12	0	7	7	6	5	6	3	80.6	25.647	1133100000	40198000	389350000	0	123540000	200460000	162910000	115900000	80485000	20234000	80934000	2871300	27810000	0	0.0113439	0.0560993	0	2	0.0337216	0.0242186	8824500	14318000	11636000	0.0168608	0.0299752	0.0271612	3	0.0246657	0.00563725	8278600
P161_RS0107130	P161_RS0107130	1380	tetratricopeptide repeat-containing sensor histidine kinase	HK|Classic		18	18	18	14	12	14	5	3	5	4	4	5	28.4	80.499	76171000	16999000	21250000	15261000	6365700	2476400	4712900	3211400	2554700	3339600	2115900	472190	590280	423910	0.00186552	0.00119073	0.000970618	3	0.00134229	0.000380738	176830	68789	130910	0.000337865	0.000144012	0.000305575	3	0.000262484	8.48031e-05	89207
P161_RS0107145	P161_RS0107145	1383	hypothetical protein			5	5	5	1	2	2	3	3	3	3	0	3	30.2	21.1	87573000	340180	1863100	789930	30009000	28738000	21972000	1518900	0	2342400	7297800	28348	155260	65828	0.000111997	0.000313196	0.000150725	3	0.000191973	8.71638e-05	2500700	2394800	1831000	0.00477803	0.00501359	0.00427399	3	0.00468854	0.0003085	126580
P161_RS0107150	P161_RS0107150	1384	ATP-binding protein			4	4	4	4	4	2	3	2	2	2	2	2	4	113.69	17187000	1373000	2505900	1496300	2710500	1319500	1595900	2809800	1855100	1521000	312490	24964	45561	27205	9.86276e-05	9.19073e-05	6.22908e-05	3	8.42752e-05	1.57856e-05	49281	23991	29017	9.416e-05	5.0226e-05	6.77326e-05	3	7.07062e-05	1.80588e-05	51088
P161_RS0107165	P161_RS0107165	1387	hypothetical protein			8	8	8	7	3	4	2	2	1	2	2	2	25.5	42.061	32053000	5351600	7902100	4346300	396540	1078300	2022600	3113500	3762900	4079600	1335600	222980	329260	181100	0.000880948	0.000664195	0.000414661	3	0.000653268	0.000190517	16523	44929	84275	3.15701e-05	9.40604e-05	0.000196718	3	0.00010745	6.80829e-05	129730
P161_RS0107170	P161_RS0107170	1388	(2Fe-2S)-binding protein			3	3	3	2	1	2	1	1	1	0	0	2	28.8	16.781	9043500	552770	886690	590350	307670	439680	0	0	0	6266400	904350	55277	88669	59035	0.000218388	0.000178866	0.000135171	3	0.000177475	3.39873e-05	30767	43968	0	5.87857e-05	9.20485e-05	0	2	7.54171e-05	3.80571e-05	0
P161_RS0107175	P161_RS0107175	1389	xanthine dehydrogenase family protein molybdopterin-binding subunit			29	29	29	18	21	25	18	18	18	16	14	21	50.7	78.404	747910000	53212000	106630000	128780000	102580000	57404000	82359000	63773000	35490000	117690000	17393000	1237500	2479700	2994800	0.00488911	0.00500214	0.00685714	3	0.00558279	0.000902276	2385700	1335000	1915300	0.0045583	0.00279487	0.00447077	3	0.00394131	0.000811446	1483100
P161_RS0107200	P161_RS0107200	1394	histone deacetylase			4	4	4	2	4	0	0	0	0	0	0	0	17.7	34.019	5676100	388960	5287200	0	0	0	0	0	0	0	298740	20472	278270	0	8.08806e-05	0.000561336	0	2	0.000321108	0.000247763	0	0	0	0	0	0	0	0	0	0
P161_RS0107205	P161_RS0107205	1395	hypothetical protein			74	74	74	63	61	57	66	48	56	51	53	50	74.7	90.428	52533000000	1678000000	2424700000	2416400000	11530000000	7497400000	9254400000	6875000000	5931900000	4925200000	1072100000	34245000	49483000	49315000	0.135295	0.0998189	0.112916	3	0.11601	0.0146473	235320000	153010000	188870000	0.44962	0.320332	0.440868	3	0.403607	0.0589926	140310000
P161_RS0107210	P161_RS0107210	1396	hypothetical protein			15	15	15	13	11	13	8	6	4	7	7	7	32.3	53.616	180660000	26686000	35376000	58541000	17958000	4504300	5231700	10711000	15379000	6271400	9032900	1334300	1768800	2927000	0.00527154	0.00356809	0.00670189	3	0.00518051	0.00128099	897910	225220	261580	0.00171561	0.000471506	0.000610591	3	0.00093257	0.0005566	535540
P161_RS0107215	P161_RS0107215	1397	methionine--tRNA ligase			44	44	44	37	34	30	18	18	15	10	12	15	60.3	77.931	1831700000	281730000	367020000	271160000	216120000	274060000	178370000	81076000	106640000	55552000	46967000	7223900	9410700	6952800	0.0285401	0.0189836	0.0159197	3	0.0211478	0.00537474	5541500	7027100	4573500	0.010588	0.0147115	0.0106756	3	0.0119917	0.00192349	2078900
P161_RS0107230;P161_RS18225	P161_RS0107230	1400	Uma2 family endonuclease			6	6	6	4	3	2	1	1	0	0	1	1	45.2	23.367	77268000	11570000	11043000	2828900	2549000	2678400	0	0	25687000	20912000	7024400	1051800	1003900	257170	0.00415544	0.0020251	0.000588837	3	0.00225646	0.00146522	231720	243490	0	0.000442742	0.000509754	0	2	0.000476248	0.000226166	0
P161_RS0107235	P161_RS0107235	1401	LD-carboxypeptidase			9	9	9	7	9	0	1	1	1	1	2	0	27.4	35.577	31473000	5490200	21355000	0	225420	168230	256580	328430	3649300	0	1967100	343140	1334700	0	0.00135568	0.00269241	0	2	0.00202404	0.00109918	14089	10514	16036	2.69195e-05	2.20114e-05	3.74319e-05	3	2.87876e-05	6.43247e-06	20527
P161_RS0107250	P161_RS0107250	1404	serine hydrolase			6	6	6	1	1	2	1	0	2	1	0	1	10.1	80.757	14793000	190970	0	696820	7015800	0	6193700	498220	0	197730	360810	4657.7	0	16996	1.84016e-05	0	3.89154e-05	2	2.86585e-05	1.58949e-05	171120	0	151070	0.000326955	0	0.000352634	2	0.000339794	0.000160523	12152
P161_RS0107255	P161_RS0107255	1405	AraC family transcriptional regulator	TR|AraC		2	2	2	1	2	0	1	1	1	1	1	1	4.4	45.646	22356000	173780	5132800	0	1256600	1098600	6094200	3613600	4575500	411440	1242000	9654.4	285150	0	3.81425e-05	0.000575215	0	2	0.000306679	0.000262631	69809	61031	338570	0.000133382	0.00012777	0.000790304	3	0.000350485	0.000311007	200750
P161_RS0107260	P161_RS0107260	1406	hypothetical protein			3	3	3	2	1	1	0	0	0	1	1	1	30.3	14.024	14957000	2143000	1010100	7486300	0	0	0	1260900	2200000	857040	1661900	238110	112240	831810	0.000940723	0.000226415	0.00190458	3	0.00102391	0.000687628	0	0	0	0	0	0	0	0	0	140100
P161_RS0107265	P161_RS0107265	1407	redoxin domain-containing protein			28	28	28	20	23	24	16	15	12	15	16	14	59.1	52.657	4100200000	147200000	371430000	513890000	458180000	527360000	462180000	628210000	816880000	174920000	164010000	5888000	14857000	20556000	0.0232623	0.0299701	0.0470667	3	0.033433	0.0100219	18327000	21094000	18487000	0.0350169	0.044161	0.0431531	3	0.040777	0.00409371	25129000
P161_RS0107270	P161_RS0107270	1408	SDR family oxidoreductase			10	10	10	7	10	0	5	3	1	5	5	3	49.6	29.052	36463000	4221800	21877000	0	2410300	898100	215940	3240400	2816400	782640	2278900	263860	1367300	0	0.00104246	0.00275817	0	2	0.00190031	0.00113714	150640	56131	13496	0.000287824	0.000117512	3.15029e-05	3	0.000145613	0.000106513	202520
P161_RS0107285	P161_RS0107285	1411	LysR family transcriptional regulator	OCS|LysR		5	5	5	3	3	0	0	0	1	0	1	1	16.5	35.242	9117700	1704100	6259700	0	0	0	0	0	891950	261990	479880	89691	329460	0	0.000354351	0.000664599	0	2	0.000509475	0.00027152	0	0	0	0	0	0	0	0	0	0
P161_RS0107295	P161_RS0107295	1413	carbonate dehydratase			12	12	12	9	11	0	5	2	5	2	2	3	38.1	24.625	486130000	15518000	47590000	0	100620000	30852000	54271000	86159000	83637000	67484000	37395000	1193700	3660800	0	0.00471606	0.0073847	0	2	0.00605038	0.00305317	7740300	2373200	4174700	0.0147892	0.00496837	0.00974475	3	0.00983411	0.00400983	6627600
P161_RS0107300	P161_RS0107300	1414	SulP family inorganic anion transporter			4	4	4	2	2	2	0	0	0	1	1	1	8.1	57.134	5538800	907130	2299700	2332000	0	0	0	0	0	0	369250	60475	153310	155470	0.000238924	0.000309263	0.000355977	3	0.000301388	4.81098e-05	0	0	0	0	0	0	0	0	0	0
P161_RS0107310	P161_RS0107310	1416	SH3 domain-containing protein			11	11	11	6	9	5	4	3	2	1	3	1	41	29.204	104130000	3945700	23791000	5748200	13496000	21556000	845530	0	23889000	10862000	8677700	328810	1982600	479020	0.00129906	0.00399937	0.0010968	3	0.00213175	0.00132319	1124600	1796300	70461	0.00214875	0.00376061	0.000164473	3	0.00202461	0.00147074	0
P161_RS0107315	P161_RS0107315	1417	hypothetical protein			32	32	32	26	22	28	16	11	10	11	10	10	53.5	66.378	395350000	39031000	70692000	78764000	131690000	18088000	14236000	26753000	8851500	7240700	10982000	1084200	1963700	2187900	0.00428345	0.00396125	0.00500959	3	0.0044181	0.000438447	3658100	502440	395440	0.00698944	0.00105187	0.000923052	3	0.00298812	0.00282985	743150
P161_RS0107320	P161_RS0107320	1418	tetratricopeptide repeat protein			11	11	11	4	7	11	4	5	4	4	4	1	40.7	30.414	45415000	2935500	9125300	22595000	2528100	3771700	1499700	1056200	1839300	64916	3784600	244630	760440	1882900	0.000966482	0.00153399	0.00431124	3	0.00227057	0.00146145	210670	314310	124980	0.000402522	0.000658018	0.000291733	3	0.000450758	0.000153376	88015
P161_RS0107325	P161_RS0107325	1419	VWA domain-containing protein			20	20	20	15	16	12	7	8	8	6	8	6	48.9	39.616	123680000	14897000	42300000	32908000	6779600	7072700	6188500	6324600	6098500	1109000	6509400	784060	2226300	1732000	0.00309766	0.00449097	0.00396573	3	0.00385145	0.000574529	356820	372250	325710	0.000681767	0.000779318	0.000760285	3	0.000740457	4.22209e-05	332870
P161_RS0107330	P161_RS0107330	1420	four helix bundle protein			4	4	4	2	3	1	2	3	1	1	0	1	28.3	13.915	9092300	1991500	3262200	730390	1006700	1090200	296950	206370	0	508050	1136500	248930	407770	91299	0.000983471	0.000822568	0.000209046	3	0.000671695	0.000333672	125840	136280	37119	0.000240439	0.000285307	8.66447e-05	3	0.00020413	8.50702e-05	25797
P161_RS0107335	P161_RS0107335	1421	VWA domain-containing protein			6	6	6	6	6	0	3	2	2	2	3	2	25.3	37.787	62466000	5314300	22579000	0	434970	2414700	3787700	4523000	21487000	1925800	3674500	312610	1328200	0	0.00123506	0.00267929	0	2	0.00195718	0.00109493	25586	142040	222800	4.88865e-05	0.000297365	0.000520069	3	0.000288774	0.000192455	266060
P161_RS0107340	P161_RS0107340	1422	hypothetical protein			9	9	9	9	7	4	3	3	3	2	3	3	33.6	34.982	142120000	36776000	54229000	13366000	13643000	3735800	7449700	4211300	6167300	2545600	7895800	2043100	3012700	742550	0.00807186	0.00607733	0.0017002	3	0.00528313	0.00266115	757930	207540	413870	0.00144816	0.000434492	0.000966072	3	0.000949574	0.000413992	233960
P161_RS0107345	P161_RS0107345	1423	DUF58 domain-containing protein			10	10	10	9	10	2	4	2	1	3	3	1	40.1	33.126	73188000	12680000	50408000	550140	2399500	1238000	293000	1607000	3731700	280880	4574300	792530	3150500	34384	0.00313112	0.0063553	7.87284e-05	3	0.00318838	0.00256272	149970	77378	18312	0.000286544	0.000161993	4.27446e-05	3	0.000163761	9.95385e-05	100440
P161_RS0107350	P161_RS0107350	1424	MoxR family ATPase			29	29	29	23	22	24	17	19	21	18	16	15	74.8	36.93	11139000000	904590000	2459600000	1297900000	928760000	1184300000	1243600000	1389300000	1311400000	419810000	556970000	45230000	122980000	64896000	0.178694	0.24808	0.148591	3	0.191788	0.041658	46438000	59216000	62182000	0.0887279	0.123971	0.145148	3	0.119282	0.0232707	69467000
P161_RS0107355	P161_RS0107355	1425	UDP-2,3-diacylglucosamine diphosphatase			4	4	4	2	3	0	1	0	1	0	0	0	20.4	30.042	22413000	1049200	7504400	0	707020	0	13152000	0	0	0	1494200	69950	500290	0	0.000276358	0.0010092	0	2	0.000642781	0.000425823	47135	0	876820	9.00597e-05	0	0.00204671	2	0.00106838	0.000944316	0
P161_RS0107370	P161_RS0107370	1428	S41 family peptidase			8	8	8	5	6	6	3	3	2	0	1	0	15.7	58.465	49809000	3151600	16028000	22092000	5058900	1760200	717850	0	1001500	0	2490500	157580	801390	1104600	0.000622566	0.00161659	0.00252918	3	0.00158945	0.000778609	252940	88010	35892	0.000483286	0.000184252	8.37806e-05	3	0.00025044	0.00016968	0
P161_RS0107375	P161_RS0107375	1429	dCMP deaminase family protein			5	5	5	2	2	2	0	0	0	1	0	2	32.6	15.796	4035900	1474600	1974000	322490	0	0	0	0	0	264810	504490	184320	246750	40312	0.00072821	0.000497753	9.23016e-05	3	0.000439422	0.000262865	0	0	0	0	0	0	0	0	0	0
P161_RS0107385	P161_RS0107385	1431	DNA repair protein RadA			12	12	12	7	9	10	5	3	5	6	6	5	33.8	49.507	144480000	13848000	51091000	35030000	18247000	2220000	13057000	4422200	4385500	2176300	7223800	692380	2554500	1751500	0.00273545	0.00515303	0.00401038	3	0.00396629	0.000987465	912360	111000	652870	0.00174322	0.000232382	0.00152396	3	0.00116652	0.000666574	221110
P161_RS0107400	P161_RS0107400	1434	flippase-like domain-containing protein			3	3	3	3	2	1	2	2	1	1	1	0	10.5	35.021	21488000	3563700	8012100	2983400	4193900	756580	371070	1017600	589180	0	2148800	356370	801210	298340	0.00140794	0.00161623	0.000683103	3	0.00123576	0.000399931	419390	75658	37107	0.000801318	0.000158393	8.66167e-05	3	0.000348776	0.000321335	101760
P161_RS0107405	P161_RS0107405	1435	aspartate 1-decarboxylase			6	6	6	3	4	4	3	3	1	3	0	2	43.1	12.726	290820000	4368800	8693900	49335000	56838000	56600000	31478000	83007000	0	494440	41545000	624110	1242000	7047900	0.00246573	0.00250541	0.0161374	3	0.00703619	0.00643557	8119700	8085700	4496800	0.0155141	0.0169277	0.0104966	3	0.0143128	0.00275947	11858000
P161_RS0107410	P161_RS0107410	1436	pantoate--beta-alanine ligase			15	15	15	8	13	0	3	3	1	3	4	1	48.2	32.616	72274000	11178000	51094000	0	2326800	1698600	631880	2004600	2103700	1236600	4517100	698600	3193400	0	0.00276002	0.00644184	0	2	0.00460093	0.00263883	145430	106160	39492	0.00027787	0.000222249	9.21838e-05	3	0.000197434	7.78102e-05	125290
P161_RS0107415	P161_RS0107415	1437	glycogen/starch synthase	CAZyme, single-domain, contains GT5 domain		18	18	18	14	17	0	8	6	8	11	10	7	66.9	31.121	4890800000	842220000	1671300000	0	511340000	173190000	318720000	679890000	481230000	212960000	287700000	49542000	98311000	0	0.19573	0.198317	0	2	0.197023	0.0928837	30079000	10187000	18748000	0.0574712	0.0213268	0.0437623	3	0.0408535	0.0148986	39993000
P161_RS0107420	P161_RS0107420	1438	DUF4270 family protein			30	30	30	23	22	25	15	16	13	12	13	12	56.1	58.244	3194100000	215190000	353550000	364390000	240580000	851410000	276490000	422400000	223970000	246100000	133090000	8966200	14731000	15183000	0.0354236	0.0297159	0.0347642	3	0.0333012	0.00254946	10024000	35475000	11521000	0.0191526	0.0742681	0.0268928	3	0.0401045	0.0243631	17600000
P161_RS0107425	P161_RS0107425	1439	glutamine--fructose-6-phosphate transaminase (isomerizing)			44	44	41	40	42	43	30	31	27	29	30	29	65.2	68.314	18574000000	1327700000	2713100000	2895000000	2250400000	2313400000	1671300000	2299700000	1581000000	1522600000	562850000	40233000	82215000	87726000	0.158952	0.165847	0.200865	3	0.175221	0.0183497	68194000	70103000	50644000	0.130297	0.146763	0.118215	3	0.131758	0.0117003	69688000
P161_RS0107430	P161_RS0107430	1440	hypothetical protein	CAZyme, multi-domain, contains two PL6 domains		13	13	13	12	8	9	3	1	2	4	2	3	22.5	87.288	189400000	16893000	20709000	21834000	41410000	50552000	34864000	1617900	664900	856130	4117400	367240	450210	474640	0.00145089	0.00090818	0.00108677	3	0.00114861	0.000225834	900210	1098900	757910	0.00172001	0.00230058	0.00176914	3	0.00192991	0.000262871	35173
P161_RS0107460	P161_RS0107460	1444	TonB-dependent receptor	SusC-like		4	4	4	2	2	2	1	1	2	1	1	0	4.5	115.59	122170000	708030	987940	2717300	1199700	59835000	51757000	566820	4399600	0	2714900	15734	21954	60384	6.21618e-05	4.42864e-05	0.00013826	3	8.15694e-05	4.07452e-05	26661	1329700	1150200	5.09405e-05	0.00278377	0.00268484	3	0.00183985	0.0012656	12596
P161_RS0107465	P161_RS0107465	1445	T9SS type A sorting domain-containing protein			5	5	5	2	4	4	1	1	1	3	3	1	18.1	41.471	11204000	1197400	1902200	2633100	349530	327170	0	646970	4011400	136240	560200	59871	95108	131660	0.000236538	0.000191855	0.000301459	3	0.000243284	4.49992e-05	17476	16358	0	3.3391e-05	3.4246e-05	0	2	3.38185e-05	1.5946e-05	32349
P161_RS0107475	P161_RS0107475	1447	helix-turn-helix domain-containing protein	TR|Xre		2	2	2	0	1	0	0	0	0	1	0	0	15.3	13.82	7710500	0	0	0	0	0	0	7710500	0	0	1285100	0	0	0	0	0	0	0	0	0	0	0	0	0	0	0	0	0	0	1285100
P161_RS0107480	P161_RS0107480	1448	Gfo/Idh/MocA family oxidoreductase	*		4	4	4	1	2	2	1	0	0	0	1	0	16.8	36.279	5341900	797180	2453700	2091000	0	0	0	0	0	0	296770	44288	136310	116170	0.000174973	0.000274969	0.000265992	3	0.000238645	4.51719e-05	0	0	0	0	0	0	0	0	0	0
P161_RS0107485	P161_RS0107485	1449	hypothetical protein			13	13	13	6	9	5	3	1	1	4	6	4	20.1	92.38	242320000	10424000	18715000	10031000	28110000	38122000	10131000	12981000	60924000	52885000	5910300	254250	456460	244660	0.00100449	0.000920788	0.000560193	3	0.00082849	0.000192767	685610	929810	247110	0.00130998	0.00194659	0.000576814	3	0.00127779	0.000559671	316600
P161_RS0107490	P161_RS0107490	1450	DUF4957 domain-containing protein	CAZyme, multi-domain, contains two PL6 domains	alginate	11	11	11	3	4	1	1	4	3	2	2	3	19.1	84.714	27487000	16509000	2106200	456230	805630	3035300	802460	927090	1678300	1167500	723360	434440	55426	12006	0.00171638	0.000111807	2.74899e-05	3	0.00061856	0.000777041	21201	79878	21117	4.05082e-05	0.000167227	4.92922e-05	3	8.56759e-05	5.77769e-05	24397
P161_RS0107495	P161_RS0107495	1451	polysaccharide lyase family 7 protein	CAZyme, single-domain, contains PL7_5 domain	alginate	4	4	4	1	1	0	1	1	1	2	2	2	12.4	38.119	2597700	1602500	192330	0	75057	61563	59797	197250	281820	127360	152810	94266	11313	0	0.000372425	2.2821e-05	0	2	0.000197623	0.000170439	4415.1	3621.3	3517.5	8.43582e-06	7.58131e-06	8.21069e-06	3	8.07594e-06	3.61631e-07	11603
P161_RS0107510	P161_RS0107510	1454	polysaccharide lyase family 7 protein	CAZyme, single-domain, contains PL7_5 domain	alginate	4	4	4	1	2	3	1	1	2	2	2	1	12.6	40.843	1767800	201560	0	659520	0	45007	48984	119680	515530	177550	80357	9162	0	29978	3.61972e-05	0	6.864e-05	2	5.24186e-05	2.80361e-05	0	2045.8	2226.6	0	4.28295e-06	5.19742e-06	2	4.74018e-06	2.26552e-06	5440.2
P161_RS0107515	P161_RS0107515	1455	SDR family oxidoreductase		alginate	6	6	6	3	4	0	1	1	1	2	3	0	28.1	26.789	8063700	1225000	5420800	0	0	266840	239370	598400	313280	0	537580	81669	361390	0	0.000322657	0.000729009	0	2	0.000525833	0.00029827	0	17789	15958	0	3.72419e-05	3.72498e-05	2	3.72458e-05	1.75579e-05	39893
P161_RS0107520	P161_RS0107520	1456	T9SS type A sorting domain-containing protein		alginate	5	5	4	3	3	1	2	2	1	2	1	2	21.4	33.453	8076100	1270500	3044000	782180	404380	1145100	229080	883720	186390	130750	807610	127050	304400	78218	0.000501948	0.000614047	0.000179094	3	0.000431696	0.000184386	40438	114510	22908	7.72639e-05	0.00023973	5.34728e-05	3	0.000123489	8.2767e-05	88372
P161_RS0107525	P161_RS0107525	1457	alginate lyase family protein	CAZyme, single-domain, contains PL17_2 domain	alginate	8	8	8	6	4	4	1	1	0	0	0	0	13.5	85.684	11370000	2753400	2559500	5517500	0	539680	0	0	0	0	252670	61187	56877	122610	0.000241737	0.000114734	0.000280738	3	0.000212403	7.08738e-05	0	11993	0	0	2.51077e-05	0	1	0	0	0
P161_RS0107535	P161_RS0107535	1459	SusC/RagA family TonB-linked outer membrane protein	SusC-like	alginate	19	19	19	9	9	13	5	6	5	10	9	10	23	119.6	46470000	3635600	4931300	5153800	2176900	2913500	2016300	10592000	8835400	6214800	860550	67327	91320	95440	0.000265995	0.000184214	0.000218527	3	0.000222912	3.35306e-05	40313	53954	37340	7.70251e-05	0.000112954	8.71605e-05	3	9.238e-05	1.51253e-05	196150
P161_RS0107540	P161_RS0107540	1460	RagB/SusD family nutrient uptake outer membrane protein	SusD-like	alginate	9	9	9	3	1	2	1	1	1	2	7	4	19.6	59.254	6331100	875440	687320	1087500	0	460610	0	656710	1858400	705110	316560	43772	34366	54376	0.000172934	6.93243e-05	0.000124504	3	0.000122254	4.23284e-05	0	23031	0	0	4.82162e-05	0	1	0	0	32836
P161_RS0107545	P161_RS0107545	1461	hypothetical protein			5	5	5	3	1	3	1	1	2	1	2	2	14.4	42.811	6528800	1558000	260500	1784700	667590	197890	553490	581830	0	924780	544060	129830	21708	148730	0.000512931	4.37902e-05	0.000340544	3	0.000299089	0.000193756	55633	16490	46124	0.000106297	3.45224e-05	0.000107664	3	8.28278e-05	3.41617e-05	48486
P161_RS19070	P161_RS19070	1462	PKD domain-containing protein	*		2	2	2	0	1	1	0	2	1	1	1	2	5.4	54.355	5322800	0	1301700	2104700	0	0	0	691920	531950	692610	443570	0	108480	175390	0	0.00021883	0.000401587	2	0.000310208	0.000164168	0	0	0	0	0	0	0	0	0	57660
P161_RS0107555	P161_RS0107555	1463	FadR family transcriptional regulator	TR|GntR		16	16	16	10	14	2	6	6	7	3	3	3	65.4	26.777	353060000	64287000	210760000	2085300	1862800	8352800	61781000	1568400	532250	1826000	29422000	5357200	17564000	173770	0.0211652	0.0354307	0.000397878	3	0.0189979	0.014384	155230	696060	5148400	0.000296594	0.00145722	0.0120176	3	0.00459047	0.0052731	130700
P161_RS0107560	P161_RS0107560	1464	MFS transporter			2	2	2	0	1	2	0	0	0	0	0	0	4.4	46.883	3084800	0	1621100	1463700	0	0	0	0	0	0	220340	0	115790	104550	0	0.000233576	0.000239386	2	0.000236481	0.000111503	0	0	0	0	0	0	0	0	0	0
P161_RS0107565	P161_RS0107565	1465	SDR family oxidoreductase			18	18	18	12	16	3	7	9	6	7	8	7	79.5	26.644	3098200000	95340000	561310000	17660000	529160000	245110000	291260000	503070000	468480000	386840000	221300000	6810000	40093000	1261400	0.0269049	0.0808771	0.0028882	3	0.0368901	0.0326123	37797000	17508000	20805000	0.0722178	0.0366536	0.0485639	3	0.0524784	0.0147805	35934000
P161_RS0107575	P161_RS0107575	1467	RNA polymerase sigma factor RpoD/SigA	SF|RpoE		5	4	4	0	1	0	1	1	1	2	0	1	17.8	32.814	5745300	0	787820	0	173670	565920	780880	2319400	0	1117600	359080	0	49239	0	0	9.93267e-05	0	1	0	0	10854	35370	48805	2.07385e-05	7.40483e-05	0.000113923	3	6.95698e-05	3.81738e-05	144970
P161_RS0107595	P161_RS0107595	1471	threonylcarbamoyl-AMP synthase			7	7	7	3	5	7	0	0	0	0	0	0	25.3	35.655	43459000	2563000	18831000	22064000	0	0	0	0	0	0	2897300	170860	1255400	1471000	0.000675032	0.00253244	0.00336812	3	0.00219186	0.00112551	0	0	0	0	0	0	0	0	0	0
P161_RS0107600	P161_RS0107600	1472	RluA family pseudouridine synthase			11	11	11	1	5	7	0	1	3	2	3	4	22.7	64.285	37967000	579280	13349000	14701000	0	364320	1638700	3182300	2342000	1810000	1150500	17554	404510	445490	6.93522e-05	0.000815992	0.00102003	3	0.000635125	0.000408641	0	11040	49658	0	2.31126e-05	0.000115914	2	6.95132e-05	5.00913e-05	96434
P161_RS0107605	P161_RS0107605	1473	hypothetical protein			9	9	9	8	7	5	3	3	3	4	3	2	46	27.317	559320000	20997000	66640000	23797000	72641000	107620000	72456000	135220000	58691000	1256200	43025000	1615200	5126200	1830500	0.00638132	0.0103408	0.00419126	3	0.00697111	0.00254493	5587800	8278600	5573500	0.0106765	0.0173315	0.0130099	3	0.0136726	0.00275703	10402000
P161_RS0107610	P161_RS0107610	1474	hypothetical protein			3	3	3	2	3	0	0	0	0	0	0	0	17.3	14.976	3329000	1394200	1934800	0	0	0	0	0	0	0	416120	174270	241850	0	0.000688505	0.000487869	0	2	0.000588187	0.000289119	0	0	0	0	0	0	0	0	0	0
P161_RS0107615	P161_RS0107615	1475	DNA polymerase I			52	52	52	41	41	37	21	20	20	25	23	27	66.1	107.38	3410000000	276720000	486380000	379570000	234560000	500100000	425410000	334030000	471030000	302150000	66862000	5425900	9536900	7442600	0.0214366	0.0192382	0.0170412	3	0.0192387	0.00179443	4599300	9805800	8341300	0.00878777	0.0205288	0.0194706	3	0.0162624	0.00530297	6549700
P161_RS0107620	P161_RS0107620	1476	sterol desaturase family protein			2	2	2	1	2	0	0	0	0	0	0	0	7.3	32.367	1126300	0	1126300	0	0	0	0	0	0	0	102390	0	102390	0	0	0.000206545	0	1	0	0	0	0	0	0	0	0	0	0	0	0
P161_RS0107625	P161_RS0107625	1477	metallophosphoesterase			6	6	6	3	2	5	1	0	1	0	1	0	17	46.859	11101000	1233400	2374100	5268200	897980	0	970810	0	356820	0	584280	64916	124950	277270	0.00025647	0.000252054	0.00063486	3	0.000381128	0.000179425	47262	0	51095	9.03023e-05	0	0.000119268	2	0.000104785	5.07919e-05	0
P161_RS0107635	P161_RS0107635	1479	DUF5615 family PIN-like protein			3	3	3	2	0	0	1	0	0	0	0	0	29.8	13.286	4218500	1398900	0	0	2819500	0	0	0	0	0	527310	174870	0	0	0.000690875	0	0	1	0	0	352440	0	0	0.000673398	0	0	1	0	0	0
P161_RS0107640	P161_RS0107640	1480	DUF433 domain-containing protein			2	2	2	2	1	0	0	0	0	0	0	0	24.3	8.4898	3974500	847880	3126600	0	0	0	0	0	0	0	794900	169580	625320	0	0.000669975	0.00126142	0	2	0.000965697	0.000515304	0	0	0	0	0	0	0	0	0	0
P161_RS0107645	P161_RS0107645	1481	universal stress protein			20	20	20	13	19	1	11	6	11	11	10	7	74.5	29.676	2347800000	229200000	351750000	338310	488330000	58314000	302940000	482000000	281120000	153780000	156520000	15280000	23450000	22554	0.0603681	0.0473042	5.16415e-05	3	0.035908	0.0259091	32555000	3887600	20196000	0.062202	0.00813882	0.0471423	3	0.0391611	0.0227813	32133000
P161_RS0107660	P161_RS0107660	1484	GHKL domain-containing protein	HK|Classic		27	27	27	12	16	16	7	11	11	12	15	12	65	53.601	1118200000	51267000	177290000	242110000	71121000	147910000	96399000	132300000	132010000	67772000	43007000	1971800	6818900	9311800	0.00779017	0.0137553	0.021321	3	0.0142889	0.00553682	2735400	5688800	3707600	0.00522646	0.0119097	0.00865443	3	0.00859686	0.00272872	5088600
P161_RS0107665	P161_RS0107665	1485	hypothetical protein			15	15	15	13	13	6	11	11	12	10	11	10	64.6	27.632	4801300000	213190000	494460000	26491000	932910000	389300000	472370000	788790000	833550000	650280000	369330000	16399000	38035000	2037800	0.0647891	0.0767256	0.00466591	3	0.0487268	0.0315346	71762000	29946000	36336000	0.137114	0.0626929	0.084817	3	0.0948746	0.0312035	60676000
P161_RS0107675	P161_RS0107675	1487	flavin mononucleotide-binding protein			3	3	3	1	1	2	0	0	0	0	0	2	18.7	17.382	3850100	1351400	951730	594250	0	0	0	0	0	952700	385010	135140	95173	59425	0.00053391	0.000191986	0.000136064	3	0.00028732	0.000175854	0	0	0	0	0	0	0	0	0	0
P161_RS0107680	P161_RS0107680	1488	PAS domain S-box protein	HK|Classic		16	16	16	10	14	11	4	3	4	4	4	5	42.5	47.416	360520000	16875000	54252000	38151000	79494000	18102000	55398000	42037000	50784000	5427200	15675000	733700	2358800	1658700	0.0028987	0.00475826	0.00379789	3	0.00381828	0.000759299	3456200	787060	2408600	0.00660368	0.00164774	0.00562225	3	0.00462455	0.00214272	1827700
P161_RS0107685	P161_RS0107685	1489	response regulator	RR|Crp		18	18	18	14	11	8	7	3	8	6	6	5	61.5	39.922	605560000	84624000	117370000	55577000	37466000	5389400	114920000	55177000	91898000	43140000	28836000	4029700	5589200	2646500	0.0159205	0.0112747	0.00605964	3	0.011085	0.00402792	1784100	256640	5472200	0.00340884	0.000537284	0.0127734	3	0.00557318	0.00522456	2627500
P161_RS0107690	P161_RS0107690	1490	universal stress protein			6	6	6	5	4	0	1	0	0	0	0	1	26.8	32.404	6343100	4211300	2131800	0	0	0	0	0	0	0	373120	247720	125400	0	0.00097869	0.000252961	0	2	0.000615826	0.000414797	0	0	0	0	0	0	0	0	0	0
P161_RS0107695	P161_RS0107695	1491	ribosome-associated translation inhibitor RaiA			4	4	4	4	2	1	1	1	0	0	0	0	60	11.381	16961000	10362000	5283300	939230	376880	0	0	0	0	0	2826800	1726900	880550	156540	0.00682262	0.00177628	0.000358427	3	0.00298578	0.00277412	62814	0	0	0.000120017	0	0	1	0	0	0
P161_RS0107700	P161_RS0107700	1492	universal stress protein			2	2	2	1	1	0	1	0	0	1	1	0	10	31.957	14601000	568160	1161400	0	402790	0	0	12115000	354350	0	1216800	47347	96787	0	0.000187058	0.000195242	0	2	0.00019115	9.0171e-05	33566	0	0	6.41337e-05	0	0	1	0	0	1009600
P161_RS0107705	P161_RS0107705	1493	gliding motility lipoprotein GldD			5	5	5	3	3	2	1	1	1	0	3	1	29.8	21.727	24916000	5539700	8310600	1308400	326190	515490	584030	0	898160	7433500	1779700	395700	593610	93454	0.00156333	0.00119745	0.00021398	3	0.000991587	0.000569778	23299	36821	41716	4.45168e-05	7.7086e-05	9.73752e-05	3	7.29927e-05	2.17726e-05	0
P161_RS0107710	P161_RS0107710	1494	gliding motility-associated protein GldE			3	3	3	2	3	2	0	1	1	0	0	0	7	50.185	7001500	923510	4017200	1324900	0	435480	300500	0	0	0	437600	57719	251070	82804	0.000228036	0.000506468	0.000189595	3	0.000308033	0.00014119	0	27218	18781	0	5.69818e-05	4.38394e-05	2	5.04106e-05	2.43619e-05	0
P161_RS0107715	P161_RS0107715	1495	single-stranded DNA-binding protein			6	6	6	5	6	4	3	2	3	2	3	3	48.6	16.658	131990000	9944800	13960000	6667800	3752400	1668400	1615100	17995000	49529000	26854000	14665000	1105000	1551100	740870	0.00436563	0.00312894	0.00169636	3	0.00306364	0.0010907	416930	185370	179460	0.000796618	0.000388078	0.000418903	3	0.000534533	0.000185749	1999500
P161_RS0107725	P161_RS0107725	1497	integration host factor subunit beta	ODP|Bhl		9	9	9	7	6	5	4	3	4	1	0	5	64.6	10.428	399250000	39435000	64395000	159030000	18779000	35129000	19739000	2373500	0	60365000	79850000	7887100	12879000	31807000	0.0311603	0.02598	0.0728279	3	0.0433227	0.0209702	3755800	7025800	3947800	0.00717611	0.0147087	0.00921511	3	0.0103667	0.00318116	474710
P161_RS0107730	P161_RS0107730	1498	ribonuclease E/G			25	25	25	18	20	20	18	15	11	11	11	11	44.4	58.915	1338900000	51440000	137450000	187380000	186170000	192370000	173380000	173330000	159990000	77390000	51496000	1978500	5286700	7206900	0.00781664	0.0106645	0.0165015	3	0.0116609	0.0036149	7160400	7399000	6668500	0.0136812	0.0154901	0.0155659	3	0.0149124	0.000871125	6666400
P161_RS0107735	P161_RS0107735	1499	PepSY domain-containing protein			7	7	7	6	7	7	2	3	3	0	0	1	20.8	42.634	101340000	9065900	28187000	35972000	2801600	10644000	14206000	0	0	461860	7795200	697380	2168200	2767000	0.0027552	0.00437377	0.00633555	3	0.00448817	0.00146391	215510	818750	1092700	0.00041177	0.00171408	0.00255062	3	0.00155882	0.000880058	0
P161_RS0107740	P161_RS0107740	1500	TonB-dependent receptor	SusC-like		44	44	44	37	34	38	22	23	19	15	17	17	63.5	89.717	3773900000	396550000	620890000	750530000	499410000	476430000	360790000	341510000	120800000	207020000	89855000	9441600	14783000	17870000	0.0373018	0.0298208	0.0409166	3	0.0360131	0.00462059	11891000	11344000	8590200	0.0227198	0.023749	0.0200516	3	0.0221735	0.00155813	8131100
P161_RS0107745	P161_RS0107745	1501	DUF4374 domain-containing protein			18	18	18	15	18	16	15	12	15	10	12	11	57.1	44.882	15163000000	2994400000	3244900000	3187500000	1661000000	542440000	1619700000	497180000	1011300000	404060000	1263500000	249530000	270410000	265620000	0.985841	0.545481	0.608185	3	0.713169	0.1945	138420000	45203000	134970000	0.264476	0.094634	0.315052	3	0.224721	0.0942741	41432000
P161_RS0107750	P161_RS0107750	1502	endonuclease			6	6	6	2	3	5	1	0	0	1	1	0	19.2	40.507	7233200	1463900	1902100	2542200	315320	0	0	388220	621560	0	482220	97592	126800	169480	0.000385566	0.000255786	0.000388055	3	0.000343135	6.17741e-05	21021	0	0	4.01643e-05	0	0	1	0	0	25881
P161_RS0107765	P161_RS0107765	1505	methylmalonyl-CoA epimerase			3	3	3	3	2	0	0	0	0	0	0	1	25.8	14.598	36383000	5574500	9216700	0	0	0	0	0	0	21591000	4547800	696820	1152100	0	0.00275299	0.00232406	0	2	0.00253852	0.00120942	0	0	0	0	0	0	0	0	0	0
P161_RS0107770	P161_RS0107770	1506	FtsX-like permease family protein			5	5	5	2	4	1	1	1	1	3	1	2	17.1	33.354	18764000	356270	14748000	950280	270430	87306	250990	1508200	107220	485340	1705800	32388	1340700	86389	0.000127958	0.00270451	0.000197803	3	0.00101009	0.00119847	24584	7936.9	22817	4.6972e-05	1.66162e-05	5.32604e-05	3	3.89495e-05	1.59994e-05	137110
P161_RS0107785	P161_RS0107785	1509	tRNA pseudouridine(55) synthase TruB			2	2	2	0	2	0	1	0	1	1	1	0	7.8	26.212	992830	0	726640	0	0	0	0	120100	146090	0	90258	0	66058	0	0	0.000133255	0	1	0	0	0	0	0	0	0	0	0	0	0	10919
P161_RS0107795	P161_RS0107795	1511	amidohydrolase			6	6	6	5	5	0	3	1	1	2	2	0	24.5	29.894	120220000	5051000	14706000	0	1340300	288560	0	31177000	67656000	0	8587000	360790	1050400	0	0.00142541	0.00211891	0	2	0.00177216	0.000882073	95737	20611	0	0.000182922	4.31498e-05	0	2	0.000113036	7.80732e-05	2226900
P161_RS0107800	P161_RS0107800	1512	PD-(D/E)XK nuclease family protein			19	19	19	15	15	11	7	5	5	7	9	7	22.4	106.22	87135000	17325000	31137000	15266000	2526600	2420400	683650	8416300	6349900	3010200	1556000	309370	556020	272600	0.00122226	0.00112162	0.000624167	3	0.000989349	0.000261471	45118	43222	12208	8.62059e-05	9.04867e-05	2.84964e-05	3	6.83963e-05	2.82676e-05	150290
P161_RS0107810	P161_RS0107810	1514	DUF2723 domain-containing protein			35	35	35	29	29	25	9	12	8	14	11	11	31.5	121.58	729090000	103840000	193920000	117540000	14970000	85060000	10290000	82967000	69944000	50560000	17359000	2472300	4617200	2798500	0.00976754	0.00931398	0.00640767	3	0.0084964	0.00148852	356420	2025200	244990	0.000681003	0.00423982	0.000571866	3	0.0018309	0.00170395	1975400
P161_RS18245	P161_RS18245	1516	AAA domain-containing protein			14	14	14	9	10	10	4	3	0	3	1	1	29.7	64.08	88785000	8190400	18194000	36107000	11589000	1585600	0	12253000	489230	376290	2864000	264210	586910	1164700	0.00104384	0.00118394	0.00266679	3	0.00163152	0.000734277	373840	51148	0	0.000714287	0.00010708	0	2	0.000410683	0.000314532	395270
P161_RS0107830	P161_RS0107830	1518	VOC family protein			7	7	7	4	5	4	4	3	1	3	1	4	26.5	15.366	103390000	10364000	13524000	1639300	16849000	10396000	2400000	17413000	660400	30140000	17231000	1727400	2254000	273220	0.0068246	0.00454685	0.000625587	3	0.00399901	0.00256021	2808200	1732600	400010	0.00536556	0.00362726	0.000933719	3	0.00330884	0.00182325	2902200
P161_RS0107835	P161_RS0107835	1519	ligase-associated DNA damage response exonuclease			3	3	3	2	2	1	1	1	0	2	2	2	12.3	38.295	46955000	1122100	2936100	1643300	555680	287670	0	487880	801480	39121000	2608600	62337	163110	91297	0.000246281	0.000329031	0.000209041	3	0.000261451	5.01467e-05	30871	15982	0	5.89845e-05	3.34588e-05	0	2	4.62217e-05	2.41528e-05	27104
P161_RS0107840	P161_RS0107840	1520	ATP-dependent DNA ligase			6	6	6	3	3	4	2	0	1	0	0	1	16.5	60.719	21574000	2895200	5882400	6597300	5501500	0	476940	0	0	220400	770490	103400	210090	235620	0.000408512	0.000423801	0.000539495	3	0.000457269	5.84761e-05	196480	0	17033	0.000375409	0	3.97591e-05	2	0.000207584	0.000168383	0
P161_RS0107845	P161_RS0107845	1521	ligase-associated DNA damage response DEXH box helicase			2	2	2	1	1	1	0	0	0	1	0	0	2.8	91.33	2714300	697870	982750	1033700	0	0	0	0	0	0	61689	15861	22335	23493	6.26635e-05	4.5055e-05	5.37915e-05	3	5.38367e-05	7.18873e-06	0	0	0	0	0	0	0	0	0	0
P161_RS0107850	P161_RS0107850	1522	ligase-associated DNA damage response endonuclease PdeM			2	2	2	2	2	0	0	1	0	0	0	0	13.6	25.2	6682000	1272000	4955400	0	0	454630	0	0	0	0	556830	106000	412950	0	0.000418784	0.000833018	0	2	0.000625901	0.00034008	0	37886	0	0	7.93156e-05	0	1	0	0	0
P161_RS0107860	P161_RS0107860	1523	threonine synthase			37	37	37	32	33	19	14	10	17	9	11	13	81.3	47.605	2846300000	613850000	889740000	470390000	278180000	45813000	285220000	80770000	116930000	65362000	109470000	23610000	34221000	18092000	0.0932782	0.0690318	0.0414249	3	0.0679117	0.0211838	10699000	1762100	10970000	0.0204423	0.00368901	0.0256066	3	0.0165793	0.00935548	3106500
P161_RS0107865	P161_RS0107865	1524	homoserine kinase			15	15	15	12	15	2	10	5	3	4	3	6	59.8	32.511	1153100000	96310000	350340000	627610	200180000	64403000	32961000	159740000	146070000	102470000	88700000	7408500	26950000	48277	0.0292694	0.0543645	0.000110539	3	0.0279148	0.0221698	15398000	4954100	2535500	0.0294206	0.0103716	0.00591847	3	0.0152369	0.0101928	12287000
P161_RS0107870	P161_RS0107870	1525	bifunctional aspartate kinase/homoserine dehydrogenase I			64	64	64	55	55	51	28	25	29	28	26	28	67.4	89.866	9361500000	999070000	2013800000	1264100000	1291200000	1065100000	881910000	563090000	762430000	520760000	208030000	22202000	44750000	28092000	0.0877155	0.0902713	0.0643217	3	0.0807695	0.0116771	28694000	23670000	19598000	0.0548249	0.0495539	0.0457464	3	0.0500418	0.00372229	12513000
P161_RS0107875	P161_RS0107875	1526	hypothetical protein			11	11	11	9	9	6	7	6	6	7	6	7	21.9	61.826	63517000	7199200	15215000	7161700	4744900	7506800	7068900	8073700	4810200	1736800	1984900	224980	475470	223800	0.000888849	0.000959135	0.000512431	3	0.000786805	0.000196123	148280	234590	220900	0.000283315	0.000491122	0.000515634	3	0.000430024	0.00010422	252300
P161_RS18250	P161_RS18250	1527	2-isopropylmalate synthase			38	38	38	32	33	23	14	12	12	6	9	10	78.5	43.013	2835300000	577970000	1009100000	426350000	139540000	237450000	305480000	9802900	59751000	69864000	128880000	26272000	45869000	19379000	0.103795	0.0925286	0.0443717	3	0.0802319	0.0257707	6342500	10793000	13886000	0.0121185	0.0225955	0.0324133	3	0.0223757	0.00828678	445580
P161_RS0107885	P161_RS0107885	1528	3-isopropylmalate dehydrogenase			36	36	35	28	31	19	18	16	18	15	15	15	79.6	40.876	5135600000	591000000	1413200000	761530000	712420000	303960000	487640000	348890000	277830000	239180000	244550000	28143000	67293000	36263000	0.111187	0.135746	0.0830307	3	0.109988	0.0215376	33925000	14474000	23221000	0.0648197	0.0303018	0.0542034	3	0.049775	0.0144356	16614000
P161_RS0107890	P161_RS0107890	1529	dihydroxy-acid dehydratase			34	34	34	25	29	29	24	24	25	21	23	23	74.4	58.835	15265000000	372390000	1190700000	1606600000	1689000000	2492100000	1816700000	2470900000	2537800000	1088300000	663680000	16191000	51769000	69854000	0.0639673	0.10443	0.159943	3	0.109447	0.0393423	73434000	108350000	78985000	0.140309	0.226834	0.18437	3	0.183838	0.035326	107430000
P161_RS0107895	P161_RS0107895	1530	biosynthetic-type acetolactate synthase large subunit			45	45	45	39	39	39	28	26	26	18	19	21	69.8	62.828	5938300000	521560000	716600000	1007500000	1027900000	953590000	711110000	404040000	330520000	265500000	204770000	17985000	24710000	34741000	0.071055	0.0498459	0.0795458	3	0.0668156	0.01249	35445000	32882000	24521000	0.0677239	0.0688396	0.0572379	3	0.0646005	0.00522599	13932000
P161_RS0107900	P161_RS0107900	1531	acetolactate synthase small subunit			21	21	21	16	18	14	10	11	10	11	0	14	88.7	20.461	3509200000	230050000	206010000	407050000	425850000	482920000	370830000	693290000	0	693210000	269940000	17696000	15847000	31311000	0.0699132	0.0319671	0.0716922	3	0.0578575	0.0183217	32758000	37147000	28525000	0.0625899	0.0777685	0.0665842	3	0.0689809	0.00642419	53330000
P161_RS0107905	P161_RS0107905	1532	ketol-acid reductoisomerase			51	51	51	39	45	32	28	20	33	31	34	35	96.9	54.643	31092000000	1536100000	6097300000	4671900000	2124000000	899350000	3446500000	4535200000	4373000000	3408200000	1110400000	54862000	217760000	166850000	0.216748	0.439273	0.382033	3	0.346018	0.0943474	75857000	32120000	123090000	0.144938	0.0672443	0.287322	3	0.166501	0.0911308	161970000
P161_RS0107910	P161_RS0107910	1533	insulinase family protein			56	56	56	36	38	38	33	33	31	41	39	39	61.4	107.1	5506300000	172570000	341720000	292550000	691400000	787720000	579550000	785320000	1173500000	681950000	103890000	3256000	6447500	5519800	0.0128638	0.0130061	0.0126386	3	0.0128362	0.000151318	13045000	14863000	10935000	0.0249248	0.0311162	0.0255249	3	0.0271886	0.00278799	14817000
P161_RS0107915	P161_RS0107915	1534	NADP-dependent glyceraldehyde-3-phosphate dehydrogenase			36	36	36	25	29	31	20	21	19	17	17	20	65.3	58.079	6712400000	467060000	1053700000	1028400000	1073200000	787070000	829460000	550680000	530320000	392410000	231460000	16105000	36336000	35461000	0.0636275	0.0732983	0.0811944	3	0.0727067	0.00718382	37009000	27140000	28602000	0.0707122	0.0568185	0.0667639	3	0.0647649	0.00584556	18989000
P161_RS0107920	P161_RS0107920	1535	azurin			11	11	11	8	9	6	5	5	4	5	6	6	61.8	18.717	370890000	50809000	63780000	53606000	35424000	22006000	15938000	20863000	68021000	40446000	37089000	5080900	6378000	5360600	0.0200736	0.0128659	0.0122741	3	0.0150712	0.00354547	3542400	2200600	1593800	0.00676838	0.00460703	0.00372031	3	0.00503191	0.00128012	2086300
P161_RS0107925	P161_RS0107925	1536	SPOR domain-containing protein			10	10	10	6	8	5	6	5	4	3	0	7	55.7	14.144	397450000	17971000	37238000	15227000	69428000	49425000	25934000	48805000	0	133420000	44161000	1996800	4137600	1691900	0.00788894	0.00834652	0.00387391	3	0.00670312	0.00200926	7714200	5491700	2881600	0.0147393	0.0114971	0.00672635	3	0.0109876	0.00329106	5422800
P161_RS0107930	P161_RS0107930	1537	c-type cytochrome			7	7	7	5	6	4	4	4	4	3	4	4	11	48.4	335280000	64771000	103770000	44255000	21341000	16022000	11430000	15231000	42377000	16078000	18626000	3598400	5765100	2458600	0.0142165	0.0116296	0.00562941	3	0.0104918	0.0035968	1185600	890130	634990	0.0022653	0.00186352	0.00148222	3	0.00187034	0.000319726	846190
P161_RS0107935	P161_RS0107935	1538	TAT-variant-translocated molybdopterin oxidoreductase			54	54	54	44	40	42	36	34	32	37	43	39	58.2	112.78	39505000000	1822900000	3365700000	3276800000	3964600000	4391700000	4968900000	4850100000	7664200000	5199900000	858800000	39628000	73168000	71234000	0.156562	0.147597	0.163103	3	0.155754	0.006356	86187000	95471000	108020000	0.164675	0.199872	0.252145	3	0.205564	0.0359353	105440000
P161_RS0107940	P161_RS0107940	1539	polysulfide reductase NrfD			11	11	11	11	10	9	10	10	10	7	7	7	19.7	55.697	3314000000	126230000	209830000	289270000	441700000	641460000	548950000	440560000	429930000	186100000	236720000	9016600	14988000	20662000	0.0356227	0.0302343	0.0473094	3	0.0377221	0.00712718	31550000	45818000	39210000	0.0602818	0.0959215	0.0915256	3	0.0825763	0.0158664	31469000
P161_RS0107945	P161_RS0107945	1540	DUF3341 domain-containing protein			5	5	5	5	4	5	5	5	5	4	5	5	39.4	20.046	4239700000	340450000	569940000	425920000	619440000	572540000	272520000	645510000	274770000	518640000	706620000	56741000	94990000	70986000	0.224172	0.191617	0.162535	3	0.192775	0.0251764	103240000	95423000	45420000	0.197258	0.199771	0.106021	3	0.167684	0.0436139	107580000
P161_RS0107950	P161_RS0107950	1541	cytochrome c			7	7	7	6	5	4	2	1	1	0	1	0	53.6	16.887	31330000	8945100	16931000	4365500	452130	0	142110	0	494030	0	3481100	993900	1881200	485060	0.00392669	0.00379483	0.00111063	3	0.00294405	0.00129754	50237	0	15790	9.59866e-05	0	3.68577e-05	2	6.64221e-05	3.95364e-05	0
P161_RS0107955	P161_RS0107955	1542	hypothetical protein			3	3	3	1	3	1	1	0	1	1	1	1	5.4	54.768	5974000	108730	3513800	849990	142550	0	75813	589180	559160	134820	497830	9060.7	292810	70833	3.57969e-05	0.000590667	0.000162185	3	0.000262883	0.000237452	11879	0	6317.8	2.26969e-05	0	1.47473e-05	2	1.87221e-05	9.40348e-06	49098
P161_RS0107960	P161_RS0107960	1543	cytochrome c oxidase subunit II			17	17	17	11	15	10	13	10	12	11	12	10	47.5	39.013	4455400000	301570000	1080500000	77594000	642150000	373400000	443450000	487430000	747790000	301460000	318240000	21541000	77180000	5542400	0.085104	0.15569	0.0126903	3	0.0844949	0.0583811	45868000	26672000	31675000	0.0876389	0.0558387	0.0739371	3	0.0724715	0.0130236	34816000
P161_RS0107965	P161_RS0107965	1544	cytochrome-c oxidase			6	6	6	5	6	5	2	2	2	4	4	3	13.8	66.259	265970000	22903000	121220000	11744000	393650	1578600	28402000	44855000	30631000	4247600	29553000	2544800	13469000	1304900	0.010054	0.0271702	0.0029878	3	0.013404	0.0101526	43739	175400	3155800	8.3571e-05	0.000367206	0.0073664	3	0.00260572	0.00336829	4983900
P161_RS0107970	P161_RS0107970	1545	Holliday junction branch migration DNA helicase RuvB			13	13	13	9	12	7	2	2	3	3	3	1	47.1	37.579	218030000	57074000	84741000	33547000	1849300	1211900	2088000	35766000	1618900	135440	11475000	3003900	4460000	1765600	0.0118678	0.00899687	0.00404266	3	0.00830244	0.00323211	97334	63785	109900	0.000185974	0.000133536	0.000256533	3	0.000192014	5.03946e-05	1882400
P161_RS0107975	P161_RS0107975	1546	solute carrier 26 family protein			6	6	6	2	3	1	0	2	1	2	1	0	11.1	63.997	5819700	490570	3987500	156270	0	563950	483570	72272	65537	0	264530	22299	181250	7103.3	8.80987e-05	0.000365624	1.62643e-05	3	0.000156662	0.00015064	0	25634	21980	0	5.36656e-05	5.13066e-05	2	5.24861e-05	2.47609e-05	3285.1
P161_RS0107980	P161_RS0107980	1547	MBL fold metallo-hydrolase			20	20	20	15	18	14	13	8	13	5	8	8	46.7	51.519	1338100000	66864000	287080000	146380000	172310000	73767000	230500000	166160000	120660000	74379000	51466000	2571700	11042000	5630200	0.0101603	0.0222743	0.0128914	3	0.0151086	0.00518812	6627100	2837200	8865300	0.0126622	0.00593977	0.0206937	3	0.0130986	0.00603118	6390900
P161_RS0107990	P161_RS0107990	1549	hypothetical protein			4	4	4	1	1	1	3	3	1	1	0	1	24.3	20.553	7688300	1544800	1278800	1398900	1105000	1468800	268340	0	0	623690	1098300	220680	182680	199840	0.000871861	0.000368509	0.00045757	3	0.00056598	0.000219325	157860	209830	38334	0.000301619	0.000439286	8.94808e-05	3	0.000276795	0.000143882	0
P161_RS0107995	P161_RS0107995	1550	universal stress protein			2	2	2	2	2	1	0	1	0	0	0	0	13.1	17.694	6796600	3946800	2849900	0	0	0	0	0	0	0	970950	563830	407120	0	0.00222758	0.000821257	0	2	0.00152442	0.0009198	0	0	0	0	0	0	0	0	0	0
P161_RS0108000	P161_RS0108000	1551	hypothetical protein			7	7	7	7	5	0	0	0	0	0	0	0	35.7	16.865	33536000	16981000	16555000	0	0	0	0	0	0	0	3353600	1698100	1655500	0	0.00670884	0.00333953	0	2	0.00502419	0.00273888	0	0	0	0	0	0	0	0	0	0
P161_RS0108005	P161_RS0108005	1552	GreA/GreB family elongation factor			11	11	11	7	9	3	3	3	1	1	0	4	79.9	15.892	191570000	63280000	90924000	17047000	3285600	3853000	1070400	712730	0	11393000	27367000	9040000	12989000	2435300	0.0357152	0.0262019	0.00557606	3	0.0224977	0.0125799	469370	550430	152910	0.000896814	0.00115234	0.000356929	3	0.000802029	0.000331571	101820
P161_RS0108020	P161_RS0108020	1553	hypothetical protein			7	7	7	6	6	5	6	6	6	6	0	7	52.6	12.875	4506300000	23796000	52018000	157970000	618420000	421200000	524770000	972920000	0	1735200000	751050000	3966000	8669700	26329000	0.0156688	0.0174888	0.060285	3	0.0311476	0.0206167	103070000	70200000	87462000	0.196933	0.146966	0.204157	3	0.182686	0.0254291	162150000
P161_RS0108025	P161_RS0108025	1554	sigma-54-dependent Fis family transcriptional regulator	RR|NtrC		24	24	24	20	19	13	13	7	11	8	10	10	53.8	49.947	443040000	88886000	157290000	20860000	55451000	2873600	44304000	6407000	53660000	13304000	16409000	3292100	5825600	772580	0.0130064	0.0117516	0.00176896	3	0.00884233	0.00502779	2053700	106430	1640900	0.00392395	0.000222815	0.00383025	3	0.00265901	0.00172307	237300
P161_RS0108030	P161_RS0108030	1555	two-component sensor histidine kinase	HK|Classic		7	7	7	5	6	4	0	0	1	0	0	0	19.5	40.261	18662000	5801900	9590700	3269700	0	0	0	0	0	0	933120	290100	479530	163490	0.00114612	0.000967325	0.00037434	3	0.000829263	0.000329857	0	0	0	0	0	0	0	0	0	0
P161_RS0108035	P161_RS0108035	1556	Na+/H+ antiporter NhaA			6	6	6	5	4	1	0	0	0	0	0	1	16.2	47.362	70043000	50364000	17981000	1096800	0	0	0	0	0	600740	4669500	3357600	1198800	73117	0.0132652	0.00241826	0.000167415	3	0.00528362	0.00571813	0	0	0	0	0	0	0	0	0	0
P161_RS0108040	P161_RS0108040	1557	elongation factor Ts			42	42	42	35	36	31	27	26	25	25	22	24	87.6	34.752	19899000000	997030000	2364100000	937260000	2483700000	2759100000	2639200000	3093900000	2838500000	1785700000	1047300000	52475000	124430000	49330000	0.207318	0.251005	0.11295	3	0.190424	0.0576127	130720000	145220000	138900000	0.249763	0.304023	0.324226	3	0.292671	0.0314411	162840000
P161_RS0108045	P161_RS0108045	1558	30S ribosomal protein S2			36	36	36	29	34	13	28	26	21	25	28	25	81.4	29.399	32502000000	5128200000	9549800000	281370000	3441100000	2844200000	2778000000	3003700000	2347300000	3127900000	2321600000	366300000	682130000	20098000	1.44718	1.37602	0.046018	3	0.956404	0.644395	245790000	203160000	198430000	0.469625	0.425322	0.463183	3	0.45271	0.0195439	214550000
P161_RS0108050	P161_RS0108050	1559	30S ribosomal protein S9			14	14	14	12	14	12	13	12	13	10	1	11	67.2	14.683	17714000000	686810000	810290000	2578200000	2566900000	2489200000	1883900000	3067100000	195070	3631300000	2530600000	98116000	115760000	368320000	0.387636	0.233515	0.843335	3	0.488162	0.258907	366700000	355600000	269130000	0.700645	0.74446	0.628214	3	0.691106	0.0479342	438160000
P161_RS0108055	P161_RS0108055	1560	50S ribosomal protein L13			14	14	14	13	13	13	11	12	12	12	4	12	76.8	16.7	22969000000	609380000	1316700000	3511900000	4307000000	4063500000	2979200000	2637800000	26141000	3517800000	2088100000	55398000	119700000	319270000	0.218866	0.241463	0.731026	3	0.397119	0.236289	391550000	369410000	270840000	0.748125	0.773372	0.632206	3	0.717901	0.0614661	239800000
P161_RS0108060	P161_RS0108060	1561	hydrolase	CAZyme, single-domain, contains CBM9 domain		12	12	12	3	6	6	2	1	0	1	3	1	18.4	100.48	24388000	3388100	10031000	8669800	0	0	0	1190000	1012000	97465	567170	78794	233280	201620	0.000311299	0.000470581	0.000461645	3	0.000414508	7.30713e-05	0	0	0	0	0	0	0	0	0	27674
P161_RS0108065	P161_RS0108065	1562	hypothetical protein	TR|LuxR		14	14	14	12	10	10	5	5	5	4	2	3	25.7	66.913	69766000	16899000	15501000	17768000	4562200	6374700	6376100	460680	1481900	341530	2051900	497040	455920	522600	0.0019637	0.000919698	0.00119659	3	0.00136	0.000441598	134180	187490	187530	0.000256374	0.000392517	0.00043774	3	0.00036221	7.7081e-05	13550
P161_RS0108075	P161_RS0108075	1564	tail fiber protein			4	4	4	2	2	1	1	1	0	0	0	0	16.2	34.364	38963000	4804400	1312200	32104000	497870	244120	0	0	0	0	3542100	436760	119290	2918600	0.00172555	0.000240636	0.00668266	3	0.00288295	0.00275434	45261	22192	0	8.64791e-05	4.64597e-05	0	2	6.64694e-05	3.53376e-05	0
P161_RS0108080	P161_RS0108080	1565	T9SS type A sorting domain-containing protein			4	4	4	0	2	1	1	1	0	1	0	0	1.7	313.35	387410	0	239970	52799	0	0	0	94641	0	0	3311.2	0	2051.1	451.27	0	4.13755e-06	1.03326e-06	2	2.58541e-06	1.75827e-06	0	0	0	0	0	0	0	0	0	808.9
P161_RS0108105	P161_RS0108105	1570	glutamine--tRNA ligase/YqeY domain fusion protein			35	35	35	26	27	30	16	14	12	11	10	12	53.7	65.427	1482500000	195800000	293530000	346810000	131510000	289210000	64199000	78884000	18524000	64061000	51121000	6751600	10122000	11959000	0.0266742	0.0204185	0.0273823	3	0.024825	0.00312925	4534800	9972800	2213800	0.00866453	0.0208784	0.00516754	3	0.0115702	0.00673497	2720100
P161_RS0108110	P161_RS0108110	1571	GTP-binding protein			3	3	3	2	2	2	0	1	0	1	0	0	33.8	8.1742	4624000	1068900	1913800	804480	0	472840	0	363930	0	0	924800	213780	382770	160900	0.0008446	0.000772138	0.00036841	3	0.000661716	0.000209498	0	94569	0	0	0.000197983	0	1	0	0	72785
P161_RS0108120	P161_RS0108120	1573	dihydroneopterin aldolase			6	6	6	4	5	3	3	3	1	2	0	2	55.9	13.41	447220000	94641000	72960000	56417000	44436000	41665000	33000000	49401000	0	54698000	89444000	18928000	14592000	11283000	0.0747806	0.0294355	0.0258345	3	0.0433502	0.0222732	8887300	8333000	6600100	0.0169807	0.0174454	0.0154062	3	0.0166108	0.000872631	9880200
P161_RS0108130	P161_RS0108130	1575	DNA starvation/stationary phase protection protein			12	12	12	10	12	8	4	7	4	6	3	6	55.1	18.306	1318700000	221260000	370500000	105600000	128340000	101630000	137210000	161970000	42527000	49703000	119890000	20114000	33682000	9599700	0.0794662	0.0679446	0.0219802	3	0.0564637	0.024833	11667000	9239300	12474000	0.0222918	0.0193428	0.0291173	3	0.023584	0.0040937	14725000
P161_RS0108135	P161_RS0108135	1576	membrane protein			83	83	83	63	75	73	24	26	25	24	26	18	46.8	209.07	1402700000	111660000	455700000	347520000	76990000	89143000	37559000	70369000	156100000	57679000	13359000	1063400	4340000	3309700	0.00420127	0.00875481	0.00757816	3	0.00684474	0.00192995	733240	848980	357700	0.00140098	0.00177737	0.000834958	3	0.00133777	0.000387325	670180
P161_RS0108140	P161_RS0108140	1577	penicillin-binding protein 1C	CAZyme, single-domain, contains GT51 domain		5	5	5	1	2	0	1	0	0	1	3	2	7.1	86.9	3585200	456120	1169700	0	0	0	0	127180	1589600	242620	83377	10607	27203	0	4.19061e-05	5.48749e-05	0	2	4.83905e-05	2.34178e-05	0	0	0	0	0	0	0	0	0	2957.7
P161_RS0108145	P161_RS0108145	1578	MBL fold metallo-hydrolase			7	7	7	7	6	0	4	3	3	4	4	3	24.6	32.033	180810000	50577000	37788000	0	4127900	5246900	25715000	26392000	18375000	12588000	12054000	3371800	2519200	0	0.0133213	0.00508182	0	2	0.00920155	0.00548908	275190	349790	1714400	0.000525799	0.000732297	0.00400182	3	0.00175331	0.00159217	1759500
P161_RS0108150	P161_RS0108150	1579	S8 family serine peptidase			39	39	39	31	30	36	24	29	24	26	23	28	74.6	60.533	5175200000	277550000	408510000	548880000	651080000	1243500000	604920000	718320000	293670000	428720000	152210000	8163100	12015000	16144000	0.0322507	0.0242371	0.0369646	3	0.0311508	0.00525387	19149000	36574000	17792000	0.0365875	0.0765689	0.0415308	3	0.0515624	0.017797	21127000
P161_RS0108155	P161_RS0108155	1580	M1 family metallopeptidase			31	31	31	25	28	26	20	18	17	17	13	17	62.9	70.349	6487900000	445240000	589990000	811170000	1298500000	945280000	644840000	921290000	272420000	559180000	223720000	15353000	20345000	27971000	0.0606565	0.0410407	0.0640447	3	0.0552473	0.0101404	44775000	32596000	22236000	0.0855505	0.0682408	0.0519042	3	0.0685652	0.013738	31769000
P161_RS0108160	P161_RS0108160	1581	T9SS type B sorting domain-containing protein	*		9	8	8	6	8	6	1	2	0	0	2	0	10	123.9	11436000	2584900	3345200	4632200	843950	0	0	0	29402	0	300940	68025	88031	121900	0.000268753	0.000177579	0.000279112	3	0.000241815	4.56177e-05	22209	0	0	4.24342e-05	0	0	1	0	0	0
P161_RS0108165	P161_RS0108165	1582	YifB family Mg chelatase-like AAA ATPase			13	13	13	6	12	9	6	8	7	6	6	7	30.1	56.839	376150000	3350300	50348000	69682000	16913000	44903000	38494000	48063000	87784000	16611000	17098000	152290	2288600	3167400	0.000601666	0.00461665	0.00725233	3	0.00415688	0.00273452	768800	2041000	1749700	0.00146893	0.0042729	0.00408422	3	0.00327535	0.00127965	2184700
P161_RS0108170	P161_RS0108170	1583	phosphoenolpyruvate carboxylase			49	49	49	46	43	35	28	24	27	28	25	26	61.7	98.683	21757000000	2496400000	4008600000	2793800000	2592000000	2156700000	1652100000	2029800000	2189900000	1837200000	588010000	67471000	108340000	75507000	0.266564	0.218547	0.172887	3	0.219333	0.0382475	70053000	58290000	44651000	0.133849	0.122032	0.104226	3	0.120036	0.0121754	54860000
P161_RS0108180	P161_RS0108180	1585	hypothetical protein			2	2	2	1	0	1	0	0	0	0	0	0	13.3	20.088	387090	387090	0	0	0	0	0	0	0	0	43010	43010	0	0	0.000169924	0	0	1	0	0	0	0	0	0	0	0	0	0	0	0
P161_RS0108185	P161_RS0108185	1586	ImmA/IrrE family metallo-endopeptidase	TR|Xre		12	12	12	9	7	7	3	3	3	3	4	4	35.2	40.622	62896000	12557000	25923000	11693000	3194900	1684400	1616200	1786600	1688200	2751600	3310300	660920	1364400	615430	0.00261116	0.00275232	0.00140914	3	0.00225754	0.000602671	168150	88651	85064	0.00032128	0.000185594	0.00019856	3	0.000235145	6.11366e-05	94031
P161_RS0108190	P161_RS0108190	1587	DUF255 domain-containing protein			7	7	7	5	4	5	2	1	3	2	0	1	12.5	74.062	62319000	17414000	16147000	15600000	6380200	3117200	2108500	1038200	0	513100	2596600	725600	672800	650000	0.0028667	0.0013572	0.00148829	3	0.00190406	0.000682786	265840	129880	87855	0.000507934	0.000271908	0.000205075	3	0.000328306	0.000129914	43260
P161_RS0108195	P161_RS0108195	1588	tRNA lysidine(34) synthetase TilS			14	14	14	7	9	5	8	6	4	5	5	5	30.6	50.888	92094000	20284000	12479000	4678800	11452000	3776900	3210300	11574000	16388000	8252200	3542100	780150	479970	179950	0.00308221	0.000968213	0.000412028	3	0.00148748	0.00115028	440460	145270	123470	0.000841576	0.000304128	0.000288209	3	0.000477971	0.00025719	445140
P161_RS0108200	P161_RS0108200	1589	alpha/beta hydrolase	*		7	7	7	4	6	1	1	1	1	2	3	2	26.2	30.949	23555000	4316100	13911000	306600	0	183270	511270	757240	1839400	1730400	1811900	332010	1070100	23584	0.0013117	0.00215864	5.39998e-05	3	0.00117478	0.000864655	0	14098	39329	0	2.95146e-05	9.18033e-05	2	6.0659e-05	3.82664e-05	58249
P161_RS0108220	P161_RS0108220	1593	aminodeoxychorismate synthase component I			7	7	7	4	3	1	3	2	1	1	2	1	15.8	50.572	14595000	4512600	2509700	1210800	2148400	481150	640160	1196800	1503500	392440	608140	188030	104570	50449	0.000742868	0.000210942	0.000115512	3	0.000356441	0.000276008	89515	20048	26673	0.000171034	4.19712e-05	6.22612e-05	3	9.17555e-05	5.66671e-05	49866
P161_RS0108225	P161_RS0108225	1594	dihydrolipoyl dehydrogenase			37	37	37	24	31	29	21	18	18	20	19	21	65	50.354	5731000000	224090000	958790000	955630000	633260000	572950000	396130000	923000000	748010000	319150000	220420000	8619000	36877000	36755000	0.0340519	0.0743896	0.0841572	3	0.0641996	0.0216874	24356000	22037000	15236000	0.0465364	0.0461352	0.0355645	3	0.0427454	0.00508029	35500000
P161_RS0108230	P161_RS0108230	1595	heme-binding domain-containing protein			3	3	3	3	3	2	2	2	2	1	0	2	30.6	18.147	110150000	3122500	7098700	26721000	14736000	31117000	10473000	0	0	16883000	15736000	446060	1014100	3817300	0.00176229	0.00204568	0.0087404	3	0.00418279	0.00322479	2105200	4445300	1496100	0.00402235	0.00930638	0.00349226	3	0.005607	0.0026248	0
P161_RS0108235	P161_RS0108235	1596	glycosyltransferase family 4 protein	CAZyme, single-domain, contains GT4 domain		6	6	6	5	4	3	1	1	2	1	2	1	18.3	45.311	26222000	5027400	5280900	3589800	159320	246480	1005000	4511400	5246000	1155200	1248600	239400	251470	170940	0.00094582	0.000507274	0.000391398	3	0.000614831	0.000238778	7586.8	11737	47858	1.44959e-05	2.45718e-05	0.000111712	3	5.02599e-05	4.36475e-05	214830
P161_RS0108245	P161_RS0108245	1598	M3 family metallopeptidase			39	39	39	32	25	29	12	19	14	13	9	15	58.3	76.963	1707400000	193780000	261290000	323850000	118620000	376830000	136220000	111000000	44811000	141030000	53357000	6055600	8165200	10120000	0.0239244	0.0164711	0.0231716	3	0.021189	0.00335019	3706700	11776000	4257000	0.0070823	0.0246534	0.00993686	3	0.0138909	0.007699	3468700
P161_RS0108250	P161_RS0108250	1599	5-(carboxyamino)imidazole ribonucleotide mutase			4	4	4	3	3	1	0	1	0	0	0	0	37.5	16.749	49600000	43118000	5497100	788830	0	196610	0	0	0	0	16533000	14373000	1832400	262940	0.0567847	0.00369638	0.000602049	3	0.0203611	0.0257864	0	65538	0	0	0.000137206	0	1	0	0	0
P161_RS0108265	P161_RS0108265	1602	5-(carboxyamino)imidazole ribonucleotide synthase			13	13	13	10	11	9	7	5	8	7	7	6	37.7	43.21	783970000	33172000	128700000	85579000	46090000	69055000	73622000	153370000	169530000	24863000	39199000	1658600	6434800	4279000	0.00655278	0.0129805	0.00979754	3	0.00977695	0.00262415	2304500	3452700	3681100	0.00440315	0.00722834	0.00859257	3	0.00674136	0.00174464	7668700
P161_RS0108270	P161_RS0108270	1603	Rieske 2Fe-2S domain-containing protein			3	3	3	3	2	1	1	0	1	0	0	1	52.2	14.999	102960000	41151000	60052000	901720	517160	0	0	0	0	333060	34318000	13717000	20017000	300570	0.054193	0.040379	0.000688209	3	0.0317534	0.0226788	172390	0	0	0.000329381	0	0	1	0	0	0
P161_RS0108275	P161_RS0108275	1604	transcription elongation factor GreA			15	15	15	14	13	11	12	12	10	6	0	7	87.9	17.615	1370900000	64690000	88674000	77258000	303660000	246670000	158870000	255850000	0	175210000	97920000	4620700	6333900	5518400	0.0182554	0.012777	0.0126354	3	0.0145559	0.00261658	21690000	17619000	11348000	0.0414425	0.036886	0.026489	3	0.0349392	0.00625806	18275000
P161_RS0108290	P161_RS0108290	1606	HIT family protein			3	3	3	1	1	1	2	2	2	2	0	3	23.3	14.585	279420000	4292800	7050100	4647800	58608000	41459000	27536000	82612000	0	53212000	55884000	858560	1410000	929570	0.00339199	0.0028443	0.00212842	3	0.00278824	0.000517373	11722000	8291800	5507200	0.0223969	0.0173592	0.0128551	3	0.0175371	0.00389746	16522000
[truncated: 1,269 more rows]
[truncated: 11 more columns]

## Sheet: Annotation
organism		strand	locus_tag	order	name	symbol	GeneID	locus_tag	locus_tag (Kappelmann)	feature_interval_length	product_length	attributes	annotation (abb.)	annotation (full)	domain architecture	comment	HTCS type	HTCS InterPro	Hmmer	HotPep	CUPP	Blast
06_Polaribacter_sp._Hel_I_88		-	P161_RS0100005	1	hypothetical protein			P161_RS0100005		555	184
[truncated: 3,457 more rows]
