# Supplementary material for: Alpha-glucans from bacterial necromass indicate an intra-population loop within the marine carbon cycle
Source: Research Square preprint supplement (doi:10.21203/rs.3.rs-3205445/v1), 2023-08-14
Supplement: Supplementary file 3 [file b2d23bc67e8b4014f5b463aa.xlsx]

## Sheet: Information
	Table S4 Proteomics of Polaribacter sp. Hel_I_88 and Muricauda sp. MAR_2010_75 grown on extracted polysaccharides from Polaribacter sp., glycogen and alginate/xylan.
	Proteome
		SusD-like
		TonB-dependent receptor
		part of the α-glucan PUL
		proteins of the Glg pathway
		part of a different PUL
	PUL annotation	annotation specific for proteins belonging to a classic PUL (CAZymes, Regulators, SusC/D-like), generated by combining multiple CAZyme-specific annotation tools
	function	NCBI annotation
	iBAQ	intensity-based absolute quantification; i.e., peak area divided by the number of all theoretical tryptic peptides between 6 and 30 amino acids
	riBAQ [%]	relative protein abundance in % of all proteins in the same sample
	PUL	annotation-based likely target substrate of the PUL
	A	culture grown on alginate
	E	culture grown on polysaccharide extract
	G	culture grown on glycogen
	X	culture grown on xylan

## Sheet: proteinGroups_Polaribacter
Protein IDs	Majority protein IDs	order	annotation	PUL annotation	PUL	Peptides	Razor + unique peptides	Unique peptides	Razor + unique peptides A1	Razor + unique peptides A2	Razor + unique peptides A3	Razor + unique peptides E1	Razor + unique peptides E2	Razor + unique peptides E3	Razor + unique peptides G1	Razor + unique peptides G2	Razor + unique peptides G3	Sequence coverage [%]	Mol. weight [kDa]	Intensity	Intensity A1	Intensity A2	Intensity A3	Intensity E1	Intensity E2	Intensity E3	Intensity G1	Intensity G2	Intensity G3	iBAQ peptides	iBAQ	iBAQ A1	iBAQ A2	iBAQ A3	riBAQ [%] A1	riBAQ [%] A2	riBAQ [%] A3	# identified	mean (no 0)	SD	iBAQ E1	iBAQ E2	iBAQ E3	riBAQ [%] E1	riBAQ [%] E2	riBAQ [%] E3	# identified	mean (no 0)	SD
P161_RS0100005	P161_RS0100005	1	hypothetical protein			10	10	10	5	5	6	8	4	6	5	4	5	53.3	21.082	124240000	11835000	6298400	5234600	18147000	8642500	5281600	19528000	32326000	16945000	11	7138100	768880	572580	424200	0.00651633	0.00727677	0.005959	3	0.00658403	0.000540106	1215700	656740	443190	0.00976226	0.00759348	0.00625216	3	0.0078693	0.00144621
P161_RS0100010	P161_RS0100010	2	glyceraldehyde-3-phosphate dehydrogenase			31	31	31	20	24	23	25	21	22	25	27	25	65.4	53.267	2307100000	199860000	85215000	239760000	169360000	155130000	74275000	385960000	371990000	625590000	25	49329000	5333600	2456900	5810600	0.0452028	0.0312241	0.081625	3	0.052684	0.0212452	4226100	3712600	1828100	0.0339363	0.0429265	0.0257893	3	0.0342174	0.00699906
P161_RS0100015	P161_RS0100015	3	trypsin-like serine protease			26	26	26	22	19	18	17	10	12	18	16	16	57.2	50.084	1.8318e+09	426260000	170430000	129540000	176570000	41204000	58341000	334930000	205500000	289040000	18	63329000	13037000	6528800	5762400	0.11049	0.0829728	0.080948	3	0.0914702	0.0134743	6112500	2074200	2582500	0.0490843	0.0239827	0.0364318	3	0.0364996	0.0102478
P161_RS0100020	P161_RS0100020	4	diaminopimelate epimerase			10	10	10	3	5	3	6	6	3	4	5	3	49.2	28.716	92859000	3997700	5518900	3471100	12028000	3985000	3606900	32003000	14704000	13546000	13	3911900	209230	268260	200220	0.00177324	0.00340925	0.00281261	3	0.00266503	0.000675999	652490	268280	225710	0.0052396	0.00310196	0.00318413	3	0.0038419	0.000988894
P161_RS0100025	P161_RS0100025	5	GNAT family N-acetyltransferase			5	5	5	1	0	1	2	1	1	5	3	3	33.9	20.47	47567000	2433900	0	543770	2272000	962650	799530	18167000	10820000	11569000	6	1940400	123340	0	27664	0.00104532	0	0.000388613	2	0.000716965	0.000431402	74503	160440	42420	0.000598271	0.00185507	0.000598426	3	0.00101726	0.000592424
P161_RS0100030	P161_RS0100030	6	endolytic transglycosylase MltG			21	21	21	7	8	7	15	11	11	16	17	11	52.8	38.792	314480000	7915900	4663500	7875700	26168000	11956000	9675300	105640000	110880000	29713000	18	9376400	343320	177250	237810	0.00290967	0.00225262	0.00334066	3	0.00283432	0.000447374	830820	440960	417130	0.00667162	0.00509855	0.00588452	3	0.0058849	0.000642201
P161_RS0100040	P161_RS0100040	8	SAM-dependent methyltransferase			10	10	10	2	3	3	2	3	0	7	2	7	50	26.047	28346000	1110400	1406200	1343400	2072300	1533400	0	13405000	1451500	6024400	9	594190	123380	156240	11006	0.00104566	0.00198561	0.000154608	3	0.00106196	0.000747594	230260	16511	0	0.00184902	0.000190907	0	2	0.00101997	0.000830307
P161_RS0100045	P161_RS0100045	9	low molecular weight phosphotyrosine protein phosphatase			4	4	4	2	2	2	2	2	2	1	1	1	33.1	16.92	14955000	570640	1171100	507600	3105900	2523100	1194100	3126600	2755800	0	9	1021200	63404	130130	56400	0.000537355	0.00165379	0.000792285	3	0.000994476	0.00047768	240650	164860	81735	0.00193246	0.00190618	0.00115305	3	0.00166389	0.000361381
P161_RS0100050	P161_RS0100050	10	chromosomal replication initiator protein DnaA	ODP|DnaA		30	30	30	10	6	9	15	13	20	13	15	16	61.1	54.396	416350000	20893000	4603700	5588000	50235000	24800000	50186000	91123000	71486000	97439000	30	7488200	472340	121610	125470	0.00400312	0.00154551	0.00176255	3	0.00243706	0.00111091	669510	385630	897670	0.00537627	0.0044588	0.0126636	3	0.00749955	0.00367068
P161_RS0100055	P161_RS0100055	11	acyl-CoA thioesterase			2	2	2	0	1	0	1	0	1	1	1	1	17.4	15.265	7627500	0	0	0	1688100	0	0	2256200	2374600	1308500	4	1906900	0	0	0	0	0	0	0	0	0	422020	0	0	0.00338889	0	0	1	0	0
P161_RS0100060	P161_RS0100060	12	peptide chain release factor N(5)-glutamine methyltransferase			3	3	3	2	2	2	2	3	3	2	2	2	13.6	33.744	36496000	2537100	2332200	2443200	3932900	1604700	3746700	6880500	5399200	7619100	13	2767400	195160	179400	187940	0.001654	0.00227995	0.00264011	3	0.00219135	0.000407423	302530	123430	288210	0.00242936	0.00142715	0.00406583	3	0.00264078	0.00108756
P161_RS0100065	P161_RS0100065	13	cardiolipin synthase			8	8	8	3	2	5	4	4	3	5	2	2	17.5	55.043	50986000	3215700	1203000	4225900	2478300	5434700	3409900	11358000	7167500	12493000	21	1994600	124860	57284	125420	0.0010582	0.000728008	0.00176185	3	0.00118269	0.000431146	96763	146040	162380	0.000777022	0.00168857	0.00229072	3	0.00158544	0.000622254
P161_RS0100070	P161_RS0100070	14	GNAT family N-acetyltransferase			12	12	12	5	5	5	6	9	8	6	5	7	65.2	18.533	172040000	7851500	7068800	3251200	15754000	17596000	8203600	39591000	42916000	29810000	14	11038000	469670	504910	232230	0.0039805	0.00641677	0.00326228	3	0.00455318	0.00134998	1008000	1159500	576670	0.0080944	0.0134066	0.00813518	3	0.00987872	0.00249463
P161_RS0100075	P161_RS0100075	15	hypothetical protein			5	5	5	2	0	2	0	4	1	0	0	1	41.6	17.277	5091700	1681600	0	0	0	2458600	627420	0	0	324160	9	187120	58343	0	0	0.000494462	0	0	1	0	0	0	92763	69714	0	0.00107256	0.000983467	2	0.00102801	0.000485974
P161_RS0100080	P161_RS0100080	16	bifunctional diaminohydroxyphosphoribosylaminopyrimidine deaminase/5-amino-6-(5-phosphoribosylamino)uracil reductase RibD			14	14	14	6	5	6	7	6	3	9	5	5	47.3	38.776	74679000	2535500	1549400	4505600	11392000	3407600	3934800	29275000	11848000	6231100	17	3212900	119400	91142	265030	0.00101193	0.0011583	0.00372304	3	0.00196442	0.00124496	563830	161300	167650	0.00452764	0.00186501	0.00236507	3	0.00291924	0.00115549
P161_RS0100085	P161_RS0100085	17	HAD-IA family hydrolase			8	8	8	6	4	3	2	4	4	4	4	6	43.1	23.865	56071000	3992600	8744600	2070300	2502600	2477800	1374300	10459000	12348000	12102000	12	2701900	226150	608960	115020	0.00191664	0.00773912	0.00161576	3	0.00375717	0.00281834	208550	100480	79616	0.00167469	0.00116179	0.00112316	3	0.00131988	0.000251385
P161_RS0100100	P161_RS0100100	20	hypothetical protein			4	4	4	1	0	0	2	0	3	1	0	0	34.6	15.737	1835400	0	0	0	783650	0	321110	730620	0	0	8	229420	0	0	0	0	0	0	0	0	0	97956	0	40139	0.000786602	0	0.000566248	2	0.000676425	0.000331316
P161_RS0100105	P161_RS0100105	21	hypothetical protein			2	2	2	0	1	1	2	0	0	2	0	1	17.3	18.669	2740000	0	218960	100010	798900	0	0	1622100	0	0	8	231610	0	27370	12501	0	0.000347838	0.000175609	2	0.000261724	0.000142007	47387	0	0	0.000380525	0	0	1	0	0
P161_RS0100115	P161_RS0100115	23	fasciclin domain-containing protein			5	5	5	3	3	3	2	4	4	5	3	4	43.8	18.948	120130000	24371000	5795900	3683100	3607500	6795600	8971600	32043000	20272000	14593000	8	5140900	565430	512780	338150	0.00479207	0.00651679	0.0047502	3	0.00535302	0.000823087	254480	550270	267940	0.00204351	0.00636244	0.00377988	3	0.00406194	0.00177444
P161_RS0100120	P161_RS0100120	24	DUF481 domain-containing protein			5	5	5	1	0	0	0	1	1	5	1	0	23	29.833	8189800	1046600	0	0	0	0	0	5544600	1598600	0	12	332050	87213	0	0	0.000739138	0	0	1	0	0	0	0	0	0	0	0	0	0	0
P161_RS0100145	P161_RS0100145	29	carbamoyl-phosphate synthase large subunit			54	54	54	38	40	38	40	39	35	36	45	42	59.5	106.28	5292200000	474870000	269410000	238680000	504400000	271200000	383470000	1163400000	904660000	1082100000	48	66514000	6126800	3642900	2588600	0.0519252	0.0462967	0.0363636	3	0.0448618	0.00643348	5320800	3792200	4266900	0.0427269	0.0438469	0.0601939	3	0.0489226	0.00798315
P161_RS0100150	P161_RS0100150	30	50S ribosomal protein L34			3	3	3	1	3	1	1	2	1	1	2	2	32.1	6.3224	511910000	50297000	41466000	25973000	40177000	58435000	17108000	107720000	110970000	59762000	2	255470000	25148000	20254000	12987000	0.213132	0.257403	0.182436	3	0.217657	0.0307718	20089000	29217000	8554100	0.161318	0.337818	0.120674	3	0.206603	0.0942549
P161_RS0100165	P161_RS0100165	34	CTP synthase			33	33	33	19	20	21	20	18	20	25	22	20	61.8	60.242	1079800000	70330000	31228000	83703000	86850000	63256000	40435000	294780000	207140000	202110000	26	24606000	1985900	963000	1818200	0.0168307	0.0122385	0.0255414	3	0.0182035	0.00551694	2128200	1562200	935940	0.0170898	0.0180628	0.0132035	3	0.0161187	0.00209928
P161_RS0100170	P161_RS0100170	35	membrane protein insertase YidC			31	31	31	26	25	26	25	23	22	20	22	24	45.8	71.858	1.6958e+09	225280000	173460000	136480000	82983000	84112000	71817000	457860000	263010000	200790000	22	44724000	6327300	4849000	4319800	0.0536244	0.0616247	0.0606829	3	0.058644	0.00357013	2179300	2288100	2354900	0.0175001	0.0264559	0.033221	3	0.0257257	0.00643875
P161_RS0100175	P161_RS0100175	36	hypothetical protein			4	4	4	2	1	0	1	0	1	1	0	0	10.9	38.743	11564000	8276700	708320	0	1308800	0	0	1270000	0	0	20	164360	413830	35416	0	0.00350725	0.000450093	0	2	0.00197867	0.00155812	65440	0	0	0.000525494	0	0	1	0	0
P161_RS0100180	P161_RS0100180	37	AI-2E family transporter			5	5	5	3	3	4	1	5	3	4	4	5	15.6	38.411	81500000	2405900	2090800	2973200	1462200	6025400	456450	32440000	25379000	8266700	8	3309200	300730	160340	220400	0.00254871	0.00203772	0.00309609	3	0.00256084	0.000432164	182770	535760	57056	0.00146767	0.00619467	0.000804899	3	0.00282241	0.00239985
P161_RS0100190	P161_RS0100190	39	N(4)-(beta-N-acetylglucosaminyl)-L-asparaginase			16	16	16	6	7	7	10	8	6	7	10	6	55	35.744	107580000	7433000	8470100	1243300	15472000	10290000	3794100	18210000	32283000	10381000	16	3813200	302330	459330	65332	0.00256227	0.00583751	0.000917758	3	0.00310585	0.00204493	733360	461990	187560	0.005889	0.00534171	0.00264594	3	0.00462555	0.00141751
P161_RS0100195	P161_RS0100195	40	glycosyl hydrolase family 92	CAZyme, single-domain, contains GH92 domain *		36	36	36	15	17	12	20	20	22	14	22	14	38	112.19	277020000	25928000	12988000	9999700	31085000	19539000	22843000	39843000	57882000	56909000	45	3656500	382820	194640	161620	0.00324443	0.00247363	0.00227037	3	0.00266281	0.000419556	438750	328850	303220	0.00352323	0.00380229	0.00427758	3	0.0038677	0.000311414
P161_RS0100200	P161_RS0100200	41	family 20 glycosylhydrolase	CAZyme, single-domain, contains GH92 domain *		13	13	13	1	0	2	3	4	5	2	8	3	18.6	90.024	20642000	299570	0	297230	1710500	1583700	2110100	2837200	7673600	4130300	46	290720	6512.4	0	6461.6	5.51932e-05	0	9.077e-05	2	7.29816e-05	3.7344e-05	21336	15483	25004	0.000171331	0.00017902	0.000352736	3	0.000234363	8.37613e-05
P161_RS0100205	P161_RS0100205	42	copper homeostasis protein CutC			7	7	7	4	4	1	0	5	2	3	7	5	30.5	25.783	17028000	1117500	1981400	448220	0	1457300	519760	3897600	3737900	3868400	16	717320	69846	71515	28014	0.000591951	0.000908866	0.00039353	3	0.000631449	0.000212231	0	68390	32485	0	0.000790752	0.000458271	2	0.000624512	0.000324182
P161_RS0100210	P161_RS0100210	43	glycoside hydrolase family 2 protein	CAZyme, single-domain, contains GH2 domain		9	9	9	1	2	3	4	3	1	1	3	3	13.5	96.607	12155000	0	389270	439160	1158400	550620	0	830340	4228300	4558900	50	47935	0	4971.4	8783.1	0	6.31802e-05	0.000123382	2	9.32809e-05	5.03752e-05	23168	11012	0	0.000186043	0.000127325	0	2	0.000156684	7.7654e-05
P161_RS0100215	P161_RS0100215	44	glycosyltransferase	CAZyme, single-domain, contains GT2 domain		6	6	6	2	2	2	1	2	3	4	3	2	23.6	35.958	41648000	2861300	2091600	1544800	1062500	1131600	1918800	12945000	15223000	2869700	14	2718800	204380	149400	110340	0.00173214	0.00189869	0.00155001	3	0.00172695	0.000142392	75889	80827	114650	0.000609401	0.000934553	0.00161739	3	0.00105378	0.000420056
P161_RS0100220	P161_RS0100220	45	hypothetical protein			7	7	7	4	4	5	2	2	2	5	5	5	57	16.842	71535000	7632800	1928200	2407300	2729700	2377600	1362400	25906000	13194000	13997000	10	3883300	354860	95274	130480	0.00300747	0.00121081	0.00183293	3	0.00201707	0.00074495	272970	237760	136240	0.00219199	0.00274907	0.00192196	3	0.00228768	0.000344379
P161_RS0100225	P161_RS0100225	46	SDR family oxidoreductase			24	24	24	18	16	18	15	17	12	20	19	20	95.1	29.644	1.9699e+09	176100000	168380000	196220000	188140000	55701000	91143000	351860000	345310000	397030000	17	58874000	5950000	5631300	4933700	0.0504268	0.0715667	0.0693067	3	0.0637667	0.00947779	5011900	2215900	2619000	0.0402464	0.0256211	0.0369467	3	0.0342714	0.00626325
P161_RS0100230	P161_RS0100230	47	DNA repair protein RecN			36	36	36	21	18	22	26	23	24	23	26	26	54	61.94	719660000	58333000	25803000	45400000	40731000	42975000	29313000	238720000	174140000	64244000	33	15976000	1534300	663010	1032700	0.0130033	0.00842602	0.014507	3	0.0119788	0.00258609	741470	1054000	723020	0.00595412	0.0121868	0.0101998	3	0.00944688	0.00259956
P161_RS0100235	P161_RS0100235	48	YkgJ family cysteine cluster protein			5	5	5	0	0	0	4	0	2	1	0	0	32.2	20.221	3676100	0	0	0	1777100	0	749010	1150100	0	0	9	105110	0	0	0	0	0	0	0	0	0	105110	0	83224	0.00084405	0	0.00117406	2	0.00100905	0.000494383
P161_RS0100240	P161_RS0100240	49	ATP-binding protein	OCS|FeoC		7	7	7	4	2	3	3	4	4	0	1	3	16.8	44.795	12974000	3304900	467370	647110	699020	1759900	3672800	0	0	2422800	20	648690	165250	23368	32355	0.00140051	0.000296978	0.00045451	3	0.000717332	0.000487341	34951	87994	183640	0.000280662	0.00101742	0.00259064	3	0.00129624	0.000963434
P161_RS0100245	P161_RS0100245	50	arginine--tRNA ligase			37	37	37	30	24	27	24	21	20	26	28	23	60.7	66.939	1.0346e+09	99661000	58993000	112170000	51170000	65529000	41481000	304430000	205560000	95558000	34	17458000	1458900	1198200	1335000	0.0123643	0.0152276	0.0187536	3	0.0154485	0.00261307	1059200	1360000	778500	0.00850554	0.0157249	0.0109824	3	0.0117376	0.00299525
P161_RS0100250	P161_RS0100250	51	dihydrolipoyl dehydrogenase			50	50	50	39	37	40	42	38	35	39	40	40	86.8	49.4	10407000000	813420000	273680000	863860000	676600000	713740000	344200000	2.1317e+09	2.0468e+09	2543500000	22	236370000	21712000	7512700	19204000	0.184011	0.095477	0.26977	3	0.183086	0.071158	15818000	16156000	9170600	0.127021	0.186802	0.129371	3	0.147731	0.0276437
P161_RS0100255	P161_RS0100255	52	hypothetical protein			13	13	13	6	5	5	6	10	9	11	10	7	40.3	44.127	248580000	12931000	3599400	2842300	20535000	33755000	35540000	92674000	31320000	15387000	21	6847800	615780	171400	135350	0.00521879	0.00217828	0.00190134	3	0.00309947	0.00150284	977840	588670	937890	0.00785221	0.00680643	0.013231	3	0.00929654	0.00281463
P161_RS17820	P161_RS17820	53	glycosyltransferase	CAZyme, multi-domain, contains two GT2 domains *		10	10	10	3	2	3	4	4	1	7	5	8	29.1	54.86	85160000	6810400	3110700	4913000	9257100	5567300	3917600	15379000	14950000	21256000	20	3836100	336380	151550	245650	0.00285085	0.00192601	0.0034508	3	0.00274255	0.000627184	447880	275730	195880	0.00359655	0.0031881	0.00276331	3	0.00318265	0.000340188
P161_RS0100265	P161_RS0100265	54	tetratricopeptide repeat protein			55	55	55	34	35	29	38	37	39	24	40	40	53.5	111.26	1366900000	109930000	68578000	54121000	156580000	159080000	103810000	158270000	241720000	314820000	49	20550000	1883000	1174500	881120	0.0159586	0.0149264	0.0123776	3	0.0144209	0.00150499	2308900	2903700	1446200	0.0185408	0.0335737	0.0204018	3	0.0241721	0.00669121
P161_RS0100270	P161_RS0100270	55	DUF4838 domain-containing protein	CAZyme, single-domain, contains GH163 domain		42	42	42	19	23	22	29	28	26	24	24	27	55	84.805	654400000	35586000	38188000	34653000	64966000	40982000	52620000	191420000	105910000	90068000	40	10985000	732450	808090	742340	0.00620758	0.0102698	0.0104281	3	0.0089685	0.00195333	1331400	816190	899020	0.0106914	0.00943711	0.0126826	3	0.010937	0.00133632
P161_RS0100275	P161_RS0100275	56	DUF1573 domain-containing protein			3	3	3	1	0	0	3	1	1	1	3	2	31.2	20	25457000	421400	0	0	5670700	3112600	1126400	2150900	12975000	0	11	1573700	38310	0	0	0.000324681	0	0	1	0	0	327990	282960	102400	0.00263381	0.00327169	0.00144457	3	0.00245003	0.000757154
P161_RS0100280	P161_RS0100280	57	LysM peptidoglycan-binding domain-containing protein	CAZyme, single-domain, contains CBM50 domain		16	16	16	10	11	9	12	10	10	13	9	10	84.7	13.732	717950000	68528000	31648000	13278000	62297000	43761000	34456000	153740000	188420000	121830000	8	41561000	4899600	2704200	1429000	0.0415246	0.034367	0.020074	3	0.0319885	0.00891718	3521900	3479100	1089200	0.0282814	0.0402267	0.0153655	3	0.0279579	0.0101521
P161_RS0100295	P161_RS0100295	59	23S rRNA (adenine(1618)-N(6))-methyltransferase RlmF			7	7	7	3	3	3	2	3	2	5	4	2	28	32.622	30727000	2060400	1522400	2483300	3009500	2577600	1514100	9088500	5491500	2979400	17	1742700	121200	89555	146070	0.00102718	0.00113813	0.00205193	3	0.00140575	0.000459162	177030	151620	89063	0.00142158	0.00175309	0.00125643	3	0.00147703	0.000206518
P161_RS0100300	P161_RS0100300	60	bacillithiol biosynthesis cysteine-adding enzyme BshC			16	16	16	8	5	5	5	5	3	5	4	6	30.8	62.14	56860000	9255900	1878400	4234700	2992500	2380000	1431600	14192000	9010000	11486000	34	1527000	255610	55247	104430	0.00216632	0.00070212	0.00146699	3	0.00144514	0.000597956	88013	48699	42105	0.000706758	0.000563077	0.000593982	3	0.000621273	6.17503e-05
P161_RS0100305	P161_RS0100305	61	zinc carboxypeptidase			55	55	55	37	38	33	43	40	36	46	42	37	65.7	93.714	3.7788e+09	281380000	146980000	88505000	322610000	258120000	277160000	1234000000	560280000	609730000	41	52558000	4968500	2639500	1558100	0.0421085	0.0335447	0.0218876	3	0.0325136	0.00828729	4265900	3380800	3563800	0.0342559	0.0390901	0.0502751	3	0.041207	0.00670897
P161_RS0100310	P161_RS0100310	62	30S ribosomal protein S12 methylthiotransferase RimO			7	7	7	0	0	1	3	3	4	4	3	4	18.7	51.65	40109000	0	0	1060300	4328500	1408700	2819700	6694800	3228200	20569000	28	906670	0	0	37869	0	0	0.000531969	1	0	0	122130	50310	64748	0.000980723	0.000581704	0.000913411	3	0.000825279	0.000174412
P161_RS0100315	P161_RS0100315	63	amidase			30	30	30	15	12	17	19	13	15	19	18	17	42.7	61.259	1.0216e+09	60472000	35929000	74536000	75629000	83322000	32122000	259320000	166510000	233800000	22	29896000	2304600	1487800	2359100	0.0195317	0.0189081	0.0331397	3	0.0238598	0.00656681	2584800	2880000	1065600	0.0207564	0.0332997	0.0150326	3	0.0230295	0.00762877
P161_RS0100325	P161_RS0100325	64	serine hydrolase			5	5	5	1	1	0	3	1	0	1	0	1	28.8	41.073	41767000	1556000	327220	0	572320	217660	0	37302000	0	1792200	24	5197.5	64832	13634	0	0.000549457	0.000173271	0	2	0.000361364	0.000229357	5197.5	9069	0	4.17367e-05	0.000104859	0	2	7.3298e-05	4.31044e-05
P161_RS0100330	P161_RS0100330	65	signal recognition particle-docking protein FtsY			29	29	29	25	22	25	22	22	18	24	23	19	83.6	35.135	2496500000	227570000	193640000	236150000	202690000	78821000	56854000	623630000	504750000	372410000	16	82904000	8207500	8387400	9643200	0.0695593	0.106593	0.135464	3	0.103872	0.0269742	5336100	3662500	2975200	0.0428497	0.0423473	0.0419717	3	0.0423895	0.000359715
P161_RS19260	P161_RS19260	66	DUF4295 domain-containing protein			2	2	2	1	1	1	1	1	1	2	1	1	66	5.3873	24813000	2929200	1996800	1091100	2003400	2161800	711340	13753000	103040	63763	2	7650200	1464600	998420	545540	0.0124126	0.0126887	0.00766353	3	0.0109216	0.00230656	1001700	1080900	355670	0.00804381	0.0124978	0.0050175	3	0.0085197	0.0030723
P161_RS0100340	P161_RS0100340	67	50S ribosomal protein L33			6	6	6	3	4	2	3	3	3	4	4	2	55	6.9852	369280000	34228000	18243000	10593000	23415000	33092000	9955300	112860000	103070000	23825000	1	86312000	7000600	3770500	3528400	0.0593307	0.0479183	0.0495656	3	0.0522715	0.0050367	5582200	10609000	2353000	0.0448259	0.122665	0.0331942	3	0.0668952	0.0397204
P161_RS0100345	P161_RS0100345	68	50S ribosomal protein L28			16	16	16	12	11	11	13	12	11	14	13	10	91.1	8.8173	2694900000	267280000	165950000	92757000	186480000	205920000	65840000	702780000	658520000	349390000	7	251360000	24668000	18629000	12573000	0.209064	0.236751	0.176621	3	0.207478	0.0245738	21128000	25172000	7385500	0.169661	0.291049	0.104189	3	0.188299	0.0774153
P161_RS0100350	P161_RS0100350	69	competence/damage-inducible protein A			17	17	17	9	10	9	12	12	9	13	11	8	48.8	45.796	548100000	30691000	18546000	10727000	94556000	57181000	45240000	157140000	58137000	75877000	21	20137000	1281700	857090	492060	0.0108625	0.0108925	0.00691227	3	0.00955578	0.00186928	3771800	2613200	1940700	0.0302882	0.0302148	0.0273778	3	0.0292936	0.00135501
P161_RS0100360	P161_RS0100360	70	hypothetical protein			3	3	3	1	1	1	2	1	0	1	2	1	18.4	13.191	35683000	2083800	1608300	653440	2883200	1541000	0	4975200	16854000	5084000	5	6927200	416750	321660	130690	0.00353199	0.00408789	0.00183588	3	0.00315192	0.000957855	367170	308200	0	0.00294843	0.00356353	0	2	0.00325598	0.00155529
P161_RS0100370	P161_RS0100370	72	fumarylacetoacetate hydrolase family protein			11	11	11	8	9	7	6	6	6	9	9	8	56.4	22.985	243160000	14623000	36039000	22786000	15367000	9206000	5150900	50750000	44179000	45060000	12	10982000	1174800	1196100	642350	0.00995654	0.0152009	0.00902348	3	0.0113936	0.00271897	1008500	619900	429240	0.00809841	0.00716753	0.00605536	3	0.0071071	0.000835166
P161_RS0100375	P161_RS0100375	73	formyltetrahydrofolate deformylase			19	19	19	9	9	8	10	10	9	11	13	9	67.8	32.928	417520000	26031000	28103000	22934000	48205000	10437000	19254000	101020000	83463000	78071000	18	10648000	810850	796450	713760	0.00687203	0.0101219	0.0100266	3	0.00900684	0.00151004	1491900	287190	362170	0.0119802	0.0033206	0.00510919	3	0.00680333	0.00373271
P161_RS0100380	P161_RS0100380	74	1,4-dihydroxy-2-naphthoyl-CoA synthase			15	15	15	10	12	11	12	12	10	13	11	9	45.9	31.146	845630000	50388000	46698000	45942000	102020000	34716000	60113000	208270000	161720000	135760000	11	51327000	3270100	3384700	3415500	0.0277144	0.0430153	0.0479796	3	0.0395698	0.00862452	6548800	1995500	3923400	0.0525879	0.0230728	0.0553481	3	0.0436696	0.0146077
P161_RS0100385	P161_RS0100385	75	hypothetical protein	*		17	17	17	9	9	4	11	13	14	11	15	12	41.3	44.161	305740000	11551000	4888300	2373700	43198000	22793000	25259000	64664000	86073000	44937000	18	8686700	376190	199330	102930	0.00318824	0.00253323	0.00144592	3	0.00238913	0.000718562	1554400	790730	755770	0.0124821	0.00914273	0.0106618	3	0.0107622	0.00136513
P161_RS0100390	P161_RS0100390	76	hypothetical protein			3	3	3	3	3	1	1	2	1	1	2	2	17.5	25.496	38382000	3377000	2794700	685220	1046700	2453400	705320	11738000	8850200	6731600	8	4782900	407250	349340	85653	0.00345148	0.00443967	0.00120322	3	0.00303146	0.00135425	130840	306670	88164	0.00105067	0.00354584	0.00124374	3	0.00194675	0.00113347
P161_RS0100395	P161_RS0100395	77	hypothetical protein			7	7	7	4	3	4	4	6	4	4	4	3	40.9	19.182	230680000	11205000	9499800	2749500	14110000	17257000	6079700	34162000	72915000	62705000	7	15731000	1297500	1241700	377540	0.0109964	0.0157804	0.00530353	3	0.0106935	0.00428254	1678100	1127000	436990	0.0134754	0.0130308	0.00616469	3	0.0108903	0.00334644
P161_RS0100400	P161_RS0100400	78	2-succinyl-5-enolpyruvyl-6-hydroxy-3-cyclohexene-1-carboxylic-acid synthase			14	14	14	7	8	7	6	3	6	6	8	4	33.7	62.833	173770000	7021700	4066400	16394000	7742100	8484900	3980000	36519000	39457000	50105000	26	4057800	189600	131070	259840	0.00160688	0.00166573	0.00365013	3	0.00230758	0.00094963	273390	326340	153080	0.00219536	0.00377327	0.00215953	3	0.00270939	0.000752421
P161_RS0100405	P161_RS0100405	79	fructose-6-phosphate aldolase			25	25	25	18	20	19	16	16	16	22	23	21	94.9	23.332	5.9906e+09	434840000	456650000	396080000	374840000	183400000	207050000	1163600000	1172700000	1.6015e+09	12	227270000	24937000	21233000	16575000	0.211343	0.269845	0.232839	3	0.238009	0.0241612	12576000	9829900	9935100	0.100987	0.113657	0.140156	3	0.118267	0.0163195
P161_RS0100410	P161_RS0100410	80	hypothetical protein			5	5	5	2	4	3	3	3	2	2	3	3	18.9	39.097	24976000	1657100	2342100	2473900	1973600	3620700	326090	3726700	5108300	3747500	18	1243700	92061	97780	108560	0.000780225	0.00124266	0.00152501	3	0.00118263	0.000307005	109640	193550	18116	0.000880427	0.0022379	0.000255566	3	0.00112463	0.000827502
P161_RS0100415	P161_RS0100415	81	SDR family oxidoreductase			15	15	15	9	11	7	8	11	9	9	11	8	69.7	29.533	338960000	16488000	24980000	14946000	46066000	22934000	22505000	65269000	62631000	63140000	17	16393000	907550	1166200	879150	0.00769157	0.0148209	0.01235	3	0.0116208	0.00295586	2647100	1226000	1113800	0.0212566	0.0141755	0.0157126	3	0.0170482	0.00304123
P161_RS0100420	P161_RS0100420	83	nucleoside triphosphate pyrophosphohydrolase			13	13	13	10	7	5	4	7	4	7	5	5	34.4	30.019	104550000	15036000	12282000	10000000	10035000	3765200	2306300	21028000	15346000	14756000	15	6309800	938940	795220	639020	0.0079576	0.0101062	0.0089767	3	0.00901352	0.000877566	668980	244690	144680	0.00537202	0.0028292	0.00204103	3	0.00341408	0.00142137
P161_RS0100425	P161_RS0100425	84	DUF5606 domain-containg protein			16	16	16	8	7	8	6	5	5	9	9	8	93.7	15.946	763110000	75427000	73328000	53622000	59631000	23105000	16956000	105080000	185640000	170330000	7	74195000	8864600	5967900	6430500	0.0751283	0.0758445	0.0903332	3	0.0804353	0.00700493	5932000	2814000	2422200	0.0476349	0.0325366	0.0341704	3	0.038114	0.00676529
P161_RS0100430	P161_RS0100430	85	peptide deformylase			16	16	16	9	7	7	6	7	7	9	9	9	88.3	22.539	173300000	5387800	7019200	5348900	8783800	6806700	3876000	54645000	49808000	31623000	9	5429000	449020	573790	245060	0.00380549	0.00729215	0.00344251	3	0.00484671	0.00173552	405490	229620	127200	0.00325615	0.00265496	0.00179443	3	0.00256851	0.000599866
P161_RS0100435	P161_RS0100435	86	Holliday junction resolvase RuvX			6	6	6	4	3	3	3	2	5	4	2	2	48.9	15.362	31503000	5134700	2753800	1965100	2625200	2730600	2771900	5096800	3070000	5354900	8	3138700	586400	344220	245630	0.00496979	0.0043746	0.00345051	3	0.00426497	0.000625069	328150	341320	284990	0.0026351	0.00394648	0.0040204	3	0.00353399	0.000636331
P161_RS0100440	P161_RS0100440	87	2,3,4,5-tetrahydropyridine-2,6-dicarboxylate N-succinyltransferase			29	29	29	23	22	25	22	22	20	21	24	17	76.8	29.555	3.7967e+09	231550000	280080000	180640000	458140000	113750000	240510000	806870000	820160000	664960000	13	179960000	12298000	15363000	9033700	0.104227	0.195244	0.126902	3	0.142124	0.0386855	22010000	6972600	11439000	0.176744	0.0806199	0.161372	3	0.139579	0.0421597
P161_RS0100445	P161_RS0100445	88	glycosyltransferase family 2 protein	CAZyme, single-domain, contains GT2 domain		18	18	18	10	6	7	5	8	7	8	9	10	59	29.302	81650000	11374000	5633200	4117100	5303000	6104700	2162400	14830000	19739000	12386000	16	3956600	436180	302650	235750	0.00369667	0.0038463	0.00331172	3	0.00361823	0.000225177	331440	328370	114800	0.00266152	0.00379674	0.0016195	3	0.00269259	0.000889126
P161_RS0100450	P161_RS0100450	89	glycosyltransferase family 25 protein	CAZyme, single-domain, contains GT25 domain		14	14	14	8	8	8	7	4	6	7	8	6	45.1	29.861	142330000	22936000	5815200	3600600	7700100	2089300	2334800	9022900	16343000	72490000	18	7182700	1203600	259160	148140	0.0102006	0.0032936	0.00208101	3	0.00519174	0.00357624	306710	105900	110570	0.00246293	0.00122446	0.00155983	3	0.00174907	0.000523013
P161_RS0100455	P161_RS0100455	90	alpha-1,2-fucosyltransferase	CAZyme, single-domain, contains GT11 domain		13	13	13	2	5	3	6	8	2	9	8	6	50.6	31.137	124520000	2834700	1216900	1032000	7781600	5629800	2238700	14981000	49947000	38854000	12	7920700	216250	12753	25096	0.00183274	0.000162075	0.000352539	3	0.000782451	0.000746725	475010	260940	132920	0.00381441	0.00301709	0.00187513	3	0.00290221	0.000795865
P161_RS0100460	P161_RS0100460	91	HD domain-containing protein			23	23	23	11	6	9	14	8	10	11	13	14	54.5	53.607	475120000	19814000	4270500	20651000	86340000	16352000	16361000	106380000	83049000	121910000	23	8160100	449040	176870	637780	0.00380566	0.0022478	0.00895928	3	0.00500425	0.00286804	882070	497740	592180	0.00708316	0.00575506	0.00835399	3	0.00706407	0.00106109
P161_RS0100465	P161_RS0100465	92	pyruvate carboxylase			74	74	74	38	41	36	50	44	49	46	56	48	65.1	129.46	2857200000	147940000	88640000	68410000	349800000	164830000	452160000	621170000	435060000	529240000	67	25464000	1763200	990450	795790	0.0149433	0.0125874	0.0111789	3	0.0129032	0.00155292	3102800	1552400	2532100	0.024916	0.0179495	0.0357208	3	0.0261954	0.0073113
P161_RS0100470	P161_RS0100470	93	ABC transporter ATP-binding protein			24	24	24	11	13	15	13	12	11	13	15	16	39.6	68.979	305260000	19703000	13254000	23233000	28620000	15768000	11343000	87965000	72234000	33141000	28	7461600	641890	438990	591380	0.00544008	0.00557901	0.00830748	3	0.00644219	0.00132018	505420	461890	337390	0.0040586	0.00534055	0.00475962	3	0.00471959	0.000524119
P161_RS0100475	P161_RS0100475	94	phospho-sugar mutase			40	40	40	25	23	21	29	25	26	30	31	28	61.8	62.987	3.8116e+09	252910000	135810000	190070000	300290000	241090000	219640000	1.0117e+09	719860000	740260000	35	67737000	6169500	3063100	3783000	0.0522871	0.0389282	0.0531421	3	0.0481191	0.00650836	5274100	4729000	3712900	0.0423519	0.0546785	0.0523785	3	0.049803	0.00535175
P161_RS0100480	P161_RS0100480	95	glycosyltransferase family 2 protein	CAZyme, single-domain, contains GT2 domain		8	8	8	6	4	5	4	4	6	7	5	3	20.1	36.451	116700000	5996300	3553000	7868100	12038000	3372300	7695500	24838000	38492000	12850000	13	8388100	424700	249940	566270	0.00359937	0.00317642	0.00795474	3	0.00491018	0.00215974	925970	259410	477320	0.00743569	0.0029994	0.00673364	3	0.00572291	0.00194702
P161_RS0100485	P161_RS0100485	96	DUF4199 domain-containing protein			2	2	2	2	2	2	2	2	2	2	2	2	19.1	18.969	217610000	27390000	10821000	9210500	9536600	14772000	6775300	29730000	54616000	54755000	5	29020000	3721400	1522400	1272400	0.0315392	0.0193478	0.0178742	3	0.0229204	0.00612404	1141400	1757900	905470	0.00916562	0.0203255	0.0127736	3	0.0140883	0.00464988
P161_RS0100495	P161_RS0100495	97	DNA polymerase III subunit beta			31	31	31	26	27	25	25	25	25	25	24	26	88.7	40.816	7.6855e+09	734190000	416040000	263460000	1.067e+09	344040000	914550000	1.5285e+09	1103600000	1314100000	20	193760000	17546000	9376200	6748600	0.148704	0.11916	0.0948017	3	0.120888	0.0220394	26125000	9997100	20387000	0.209788	0.11559	0.287603	3	0.204327	0.0703299
P161_RS0100500	P161_RS0100500	98	PIG-L family deacetylase	CAZyme, single-domain, contains CE14 domain		52	52	52	33	32	28	32	30	31	32	35	29	62.3	93.721	958820000	96028000	42958000	32903000	69901000	41490000	52387000	244610000	187370000	191170000	54	12503000	1332600	563740	516910	0.0112939	0.00716443	0.00726135	3	0.00857323	0.00192422	954540	672760	795260	0.00766511	0.00777871	0.0112189	3	0.00888756	0.00164913
P161_RS0100505	P161_RS0100505	99	sodium:solute symporter			3	3	3	1	2	3	2	2	1	1	1	2	6.4	64.234	16684000	623840	564890	865840	5226700	1293000	1115300	1583800	1119100	4291700	15	217570	41589	37659	57723	0.000352471	0.000478599	0.00081087	3	0.000547313	0.000193346	29704	86203	74351	0.000238528	0.000996713	0.00104888	3	0.000761374	0.000370321
P161_RS0100510	P161_RS0100510	100	Gfo/Idh/MocA family oxidoreductase	*		18	18	18	7	9	7	12	8	6	10	12	8	62.8	36.662	200960000	7667500	10991000	6944500	19039000	8317600	5372500	64439000	60338000	17847000	17	7890300	375840	463100	319610	0.00318528	0.00588542	0.00448976	3	0.00452015	0.00110254	913940	381810	316030	0.00733908	0.00441464	0.00445829	3	0.005404	0.00136842
P161_RS0100515	P161_RS0100515	101	2-hydroxyacid dehydrogenase			29	29	29	19	20	21	21	23	20	26	23	26	84.8	36.818	3.995e+09	139600000	156940000	158730000	373540000	125410000	191370000	1.4668e+09	818710000	563910000	20	86572000	4058600	4060200	4757100	0.034397	0.0516	0.0668259	3	0.050941	0.0132472	9949800	3980000	5354800	0.0798985	0.0460183	0.0755411	3	0.0671526	0.0150497
P161_RS0100520	P161_RS0100520	102	DUF2911 domain-containing protein			31	31	31	30	29	26	21	21	21	30	30	26	73.8	31.097	12037000000	1341100000	1325400000	731130000	477540000	170160000	333360000	2.9774e+09	2393900000	2286700000	16	364100000	38707000	40955000	28308000	0.328045	0.520487	0.39766	3	0.415397	0.0795586	16771000	7934600	12657000	0.134674	0.0917429	0.178554	3	0.13499	0.0354414
P161_RS0100525	P161_RS0100525	103	NAD(P)H-binding protein			8	8	8	6	3	5	5	6	3	5	5	4	34.3	29.186	54398000	5393400	4189700	4195400	4596700	2038300	3202000	10579000	9165900	11037000	16	3399900	337090	261860	262210	0.00285687	0.00332791	0.00368342	3	0.0032894	0.000338537	287290	127390	200120	0.00230698	0.00147293	0.00282313	3	0.00220101	0.000556284
P161_RS0100530	P161_RS0100530	104	VOC family protein			7	7	7	4	5	6	5	3	3	6	5	6	60.9	16.085	359100000	14715000	6239200	5483100	28146000	29113000	5832300	97193000	96076000	76307000	8	21582000	772410	439170	307130	0.00654625	0.0055813	0.00431444	3	0.00548066	0.000913905	1734100	1961800	514280	0.0139251	0.0226831	0.00725504	3	0.0146211	0.00631768
P161_RS0100535	P161_RS0100535	105	S41 family peptidase	*		71	71	71	35	42	43	50	47	46	42	52	43	65	122.59	2459400000	114700000	88819000	77816000	262390000	142840000	187560000	496060000	523820000	565360000	60	33037000	1660900	1279400	1181000	0.0140763	0.0162596	0.0165902	3	0.015642	0.00111535	3672900	2139700	2547900	0.029494	0.02474	0.0359437	3	0.0300592	0.00459129
P161_RS0100545	P161_RS0100545	107	hypothetical protein			26	26	26	11	18	12	12	16	15	18	11	13	58.8	48.865	1.0646e+09	85420000	49540000	35701000	168600000	54091000	107020000	213390000	174130000	176750000	25	31670000	2678600	1707000	1067900	0.0227014	0.0216938	0.0150014	3	0.0197989	0.00341715	4553300	1915400	3481200	0.0365637	0.0221466	0.0491099	3	0.0359401	0.0110165
P161_RS0100550	P161_RS0100550	108	AI-2E family transporter			6	6	6	2	2	2	2	3	1	5	4	2	15	40.249	25394000	2102200	2718400	1553600	780100	1442800	192180	7512900	5310800	3781100	9	2433200	233580	231790	172620	0.00197961	0.00294576	0.0024249	3	0.00245009	0.00039483	86678	148570	21354	0.000696038	0.00171782	0.000301245	3	0.000905036	0.0005969
P161_RS0100555	P161_RS0100555	109	SAM-dependent methyltransferase			9	9	9	2	1	2	2	4	5	2	1	3	24.4	45.74	17349000	1989800	419820	692750	3730400	2971300	1757000	3087000	1493400	1207200	20	844730	99488	20991	34637	0.00084317	0.000266769	0.000486567	3	0.000532169	0.000237514	186520	148560	65156	0.00149779	0.00171771	0.000919167	3	0.00137822	0.000336788
P161_RS0100560	P161_RS0100560	110	formate dehydrogenase accessory sulfurtransferase FdhD			9	9	9	1	1	1	3	2	2	8	7	4	34.7	29.836	113260000	11163000	22566000	2141200	13185000	1134900	9425900	28209000	20877000	4556500	17	6453700	656640	1327400	125950	0.00556508	0.0168696	0.0017693	3	0.00806799	0.00641369	729990	66758	554470	0.00586194	0.000771882	0.007822	3	0.00481861	0.00297125
P161_RS0100565	P161_RS0100565	111	FdhF/YdeP family oxidoreductase			18	18	18	2	1	0	8	8	7	7	14	8	25	84.63	104770000	2847300	1390300	0	6031300	3906500	39362000	12068000	29528000	9637700	46	2095000	61898	30223	0	0.000524591	0.000384096	0	2	0.000454344	0.000221727	131120	84925	831060	0.00105291	0.000981936	0.0117239	3	0.00458625	0.00504717
P161_RS0100570	P161_RS0100570	112	hypothetical protein			11	11	11	7	7	6	8	5	7	7	7	7	25.4	55.919	184990000	15035000	8871100	13272000	17629000	7636600	17050000	24688000	22782000	58028000	27	6356600	508360	328560	491540	0.0043084	0.00417558	0.00690496	3	0.00512965	0.00125651	652920	282840	631500	0.00524305	0.00327031	0.00890868	3	0.00580735	0.00233618
P161_RS17830	P161_RS17830	113	beta-N-acetylhexosaminidase	CAZyme, single-domain, contains GH20 domain		37	37	37	15	12	15	25	20	19	23	21	19	54.9	63.64	725900000	34290000	10511000	32345000	65183000	52112000	27940000	174890000	131170000	197460000	29	14811000	933420	336710	896750	0.00791082	0.00427916	0.0125972	3	0.00826239	0.00340491	1156100	1304400	713370	0.00928367	0.015082	0.0100636	3	0.0114764	0.00256932
P161_RS0100580	P161_RS0100580	114	energy-dependent translational throttle protein EttA			49	49	49	32	30	31	35	32	30	32	37	38	77.6	63.449	3.295e+09	251840000	146020000	210650000	249290000	174340000	150820000	960830000	683610000	467570000	32	76644000	6313200	3776100	4826500	0.053505	0.0479895	0.0678008	3	0.0564317	0.00834851	5989000	4212800	3837300	0.0480926	0.04871	0.0541335	3	0.050312	0.00271388
P161_RS0100590	P161_RS0100590	115	NADPH-dependent 2,4-dienoyl-CoA reductase			37	37	37	14	11	11	25	18	24	25	29	31	59.2	74.636	574850000	10436000	7197900	9785600	49293000	28093000	37153000	219880000	120260000	92756000	41	5935300	166290	105730	158160	0.00140932	0.0013437	0.00222177	3	0.00165826	0.00039936	653690	391030	451850	0.00524923	0.00452124	0.00637433	3	0.0053816	0.000762286
P161_RS0100595	P161_RS0100595	116	NAD-dependent succinate-semialdehyde dehydrogenase			39	39	39	24	22	25	33	32	32	32	29	30	77.5	50.503	5674800000	191390000	88977000	235850000	817160000	534540000	464670000	1187400000	567590000	1.5872e+09	26	65735000	3130900	1647500	3469800	0.0265347	0.0209377	0.0487424	3	0.0320716	0.0120075	8608500	7003800	6163900	0.0691276	0.0809807	0.0869552	3	0.0790212	0.0074088
P161_RS0100600	P161_RS0100600	117	pirin family protein			9	9	9	8	8	9	7	5	7	6	4	6	41.9	26.422	192250000	37633000	35883000	26234000	13893000	7812300	13884000	25600000	13768000	17546000	17	9292000	1696400	1886200	1166800	0.0143771	0.0239712	0.0163908	3	0.0182464	0.00413071	629190	459550	665730	0.0050525	0.0053135	0.00939157	3	0.00658585	0.0019868
P161_RS0100605	P161_RS0100605	118	pirin family protein			14	14	14	11	8	6	7	4	7	7	5	5	54	32.427	119890000	23206000	20174000	13619000	11854000	2738000	8539500	19300000	9231900	11231000	11	9380300	1390300	1602000	1008100	0.0117829	0.0203594	0.0141614	3	0.0154346	0.00361522	880200	248910	732030	0.00706815	0.00287799	0.0103269	3	0.00675767	0.00304891
P161_RS0100610	P161_RS0100610	119	MarR family transcriptional regulator	TR|MarR		3	3	3	3	2	2	1	1	1	1	1	2	46.9	16.922	19836000	6657400	1458600	400590	0	1012800	294840	3327300	3297900	3386400	2	1826100	1478400	429260	200300	0.0125296	0.00545536	0.00281374	3	0.00693289	0.00410177	0	506400	147420	0	0.00585519	0.00207968	2	0.00396744	0.00242356
P161_RS0100620	P161_RS0100620	121	NAD(P)H-dependent oxidoreductase	*		19	19	19	17	14	13	14	9	11	13	10	11	96.6	19.741	1150300000	313410000	145260000	122130000	86893000	77417000	31338000	147940000	159360000	66586000	12	53528000	14152000	7330900	5810700	0.11994	0.0931665	0.0816264	3	0.0982442	0.016048	3187300	4531900	1595100	0.0255945	0.0523996	0.0225024	3	0.0334988	0.0134244
P161_RS0100630	P161_RS0100630	123	ATP-binding protein			36	36	36	20	17	23	22	16	22	19	28	24	54.7	72.441	669850000	49169000	27643000	55130000	44631000	39587000	32206000	216350000	130980000	74156000	34	14128000	1125200	659070	1222900	0.00953617	0.00837595	0.0171788	3	0.011697	0.00390508	954560	893520	780510	0.00766527	0.0103312	0.0110108	3	0.00966909	0.00144382
P161_RS0100635	P161_RS0100635	124	hypothetical protein			20	20	20	7	5	14	13	12	15	10	15	14	43	65.471	201440000	6120400	3652900	13639000	17940000	12265000	12857000	62974000	49564000	22431000	33	4118400	158120	96058	261110	0.00134008	0.00122078	0.00366797	3	0.00207628	0.00112655	405560	278850	314940	0.00325671	0.00322417	0.00444291	3	0.00364127	0.000567006
P161_RS0100640	P161_RS0100640	125	hypothetical protein			3	3	3	0	0	0	1	2	0	1	2	0	17.8	19.883	7914400	0	0	0	458980	1848100	0	1810900	3796500	0	10	75371	0	0	0	0	0	0	0	0	0	45898	75371	0	0.000368568	0.000871469	0	2	0.000620019	0.000357182
P161_RS0100645	P161_RS0100645	126	hypothetical protein			9	9	9	2	2	1	2	3	4	6	4	5	22.4	48.687	49311000	1594100	506620	246690	4154800	2735900	7914100	14970000	9999500	7189300	19	2020600	83900	26664	12984	0.00071106	0.000338866	0.000182394	3	0.000410773	0.000221736	218670	94202	327220	0.00175595	0.0010892	0.00461615	3	0.0024871	0.00152987
P161_RS0100650	P161_RS0100650	127	NUDIX domain-containing protein			9	9	9	7	5	3	2	4	2	6	6	7	48.5	22.223	55926000	3615500	2503600	2263100	671750	1671700	4491700	14774000	12546000	13389000	13	3847400	278120	163370	174080	0.00235709	0.00207623	0.00244541	3	0.00229291	0.000157402	51673	128590	345510	0.000414942	0.00148681	0.00487417	3	0.00225864	0.00190052
P161_RS0100655	P161_RS0100655	128	AAA family ATPase			35	35	35	19	14	18	21	14	16	16	27	17	58	75.133	375480000	26607000	15194000	21449000	42122000	21321000	26934000	106700000	64100000	51057000	39	5275900	437820	193730	438770	0.00371056	0.00246206	0.00616367	3	0.0041121	0.00153762	343000	340740	287960	0.00275434	0.00393977	0.0040623	3	0.00358547	0.000589821
P161_RS0100660	P161_RS0100660	129	hypothetical protein			10	10	10	3	7	5	5	6	6	3	6	4	36.8	40.805	61152000	1763400	4833400	3906600	2758600	2714500	1371000	15420000	18876000	9508900	23	575140	15892	65350	42946	0.000134686	0.000830516	0.000603289	3	0.00052283	0.000289713	30050	65247	22888	0.000241306	0.000754411	0.000322885	3	0.000439534	0.000225129
P161_RS0100665	P161_RS0100665	130	type II toxin-antitoxin system PemK/MazF family toxin			5	5	5	3	2	0	3	1	1	2	2	2	29.1	12.503	24872000	2468900	1359200	0	2253300	140980	373890	4142200	6642400	7491300	7	1911000	224480	128290	0	0.00190249	0.0016304	0	2	0.00176645	0.000840087	222320	20140	53413	0.00178526	0.000232867	0.000753506	3	0.000923879	0.000645113
P161_RS0100675	P161_RS0100675	132	hypothetical protein			48	48	48	19	14	23	25	23	18	29	29	23	78.3	51.058	1.6926e+09	115410000	11726000	198830000	103020000	87431000	49044000	328020000	317620000	481510000	29	14120000	2122700	212600	811560	0.0179901	0.00270188	0.0114005	3	0.0106975	0.00626115	544460	987470	1042900	0.0043721	0.0114175	0.0147124	3	0.0101673	0.00431297
P161_RS0100685	P161_RS0100685	133	T9SS type B sorting domain-containing protein			37	37	21	24	31	27	32	32	19	33	33	35	32.5	163.06	581500000	11735000	36251000	14466000	90067000	54218000	27954000	127970000	68580000	150260000	43	9065200	164320	683710	248250	0.00139263	0.00868909	0.00348732	3	0.00452301	0.00306748	1493500	795940	352640	0.011993	0.00920297	0.00497475	3	0.00872359	0.00288519
P161_RS0100690	P161_RS0100690	134	translation initiation factor IF-2			90	90	90	54	62	61	62	62	57	50	62	55	76	105.34	6.9883e+09	587290000	401040000	327000000	603650000	404210000	526420000	1256500000	1090900000	1.7913e+09	45	78052000	6737200	4302000	4175800	0.0570984	0.054673	0.05866	3	0.0568105	0.00164037	6375600	5277800	5464100	0.0511971	0.061024	0.077083	3	0.0631014	0.0106695
P161_RS0100695	P161_RS0100695	135	transcription termination/antitermination protein NusA			38	38	38	29	27	29	30	25	28	32	31	31	76.3	47.396	9372700000	730040000	274450000	1118500000	542440000	638770000	351080000	1.9807e+09	1295500000	2441100000	22	145490000	13586000	5055900	17239000	0.115143	0.0642541	0.242167	3	0.140521	0.0748166	9862800	11564000	5469900	0.0791998	0.133707	0.0771648	3	0.0966907	0.026188
P161_RS0100700	P161_RS0100700	136	ribosome assembly cofactor RimP			5	5	5	4	5	4	2	1	2	1	0	1	43.1	17.292	39662000	10103000	7234700	3122300	4894900	2520500	2024500	6149900	0	3612100	6	1280400	419710	223550	134780	0.00355708	0.00284104	0.00189334	3	0.00276382	0.000681412	75267	163250	208440	0.000604406	0.00188756	0.0029405	3	0.00181082	0.000955248
P161_RS0100705	P161_RS0100705	137	universal stress protein			19	19	19	10	12	10	16	15	13	19	15	15	65.2	31.273	1263300000	45308000	73460000	24532000	177660000	32356000	136330000	334550000	150680000	288440000	13	45074000	1564300	3115000	1596300	0.0132576	0.0395877	0.0224242	3	0.0250898	0.0109132	6158400	1530600	4803600	0.0494529	0.0176974	0.0677652	3	0.0449718	0.0206842
P161_RS0100715	P161_RS0100715	139	TlpA family protein disulfide reductase			15	14	14	0	1	1	8	7	5	5	7	4	28.3	59.503	71298000	0	298230	0	9320100	5011400	2641100	16478000	23676000	13874000	30	987380	0	9941	0	0	0.000126338	0	1	0	0	189930	122470	33658	0.00152517	0.00141605	0.000474819	3	0.00113868	0.000471528
P161_RS0100720	P161_RS0100720	140	recombination protein RecR			13	13	13	7	5	7	8	8	7	8	9	7	61	22.919	252700000	30634000	9062800	9964600	23687000	17208000	19286000	37012000	76426000	29415000	13	15586000	2129000	697130	744060	0.0180435	0.00885965	0.0104523	3	0.0124518	0.00400701	1680400	1209100	1426300	0.0134939	0.0139801	0.0201211	3	0.015865	0.00301602
P161_RS0100725	P161_RS0100725	141	sodium:solute symporter			4	4	4	4	3	3	2	3	3	4	2	1	8.4	53.7	21217000	3031200	1301100	2915100	1652200	1250700	1655700	5821000	1755100	1835000	16	1326100	189450	81317	182190	0.00160561	0.00103344	0.00255933	3	0.00173279	0.000629403	103260	78170	103480	0.000829194	0.000903832	0.00145981	3	0.00106428	0.000281338
P161_RS0100735	P161_RS0100735	143	T9SS type A sorting domain-containing protein			81	81	69	41	41	32	53	57	42	59	68	69	59.2	310.11	2831300000	58148000	52111000	33646000	248710000	265070000	101350000	721230000	725040000	626020000	56	24335000	506050	557010	390790	0.00428882	0.0070789	0.00548967	3	0.00561913	0.00114272	2183400	2277600	1230100	0.017533	0.0263345	0.0173532	3	0.0204069	0.00419207
P161_RS0100740	P161_RS0100740	144	choice-of-anchor A family protein	*		36	32	32	5	14	7	18	19	8	17	24	16	21.4	209.33	255280000	6520700	7486000	7438500	24936000	19626000	6058300	81050000	58074000	44093000	54	2517000	42899	101390	123650	0.000363573	0.00128854	0.00173699	3	0.0011297	0.000571833	279430	233070	50304	0.00224387	0.00269485	0.000709647	3	0.00188279	0.000849721
P161_RS0100745	P161_RS0100745	145	pyridoxamine 5'-phosphate oxidase			9	9	9	5	8	4	2	1	3	5	5	5	46	25.063	184530000	11601000	16084000	6667500	16846000	5236000	4689900	41940000	50393000	31068000	10	5662100	711770	712640	141710	0.00603232	0.00905676	0.00199069	3	0.00569325	0.00289466	970140	523600	165540	0.00779038	0.00605407	0.0023353	3	0.00539325	0.00227552
P161_RS0100750	P161_RS0100750	146	histidine phosphatase family protein			12	12	12	5	7	5	5	6	6	11	8	8	85.8	18.461	1229600000	94001000	85609000	44254000	64070000	65508000	29667000	264180000	319050000	263220000	8	67039000	5103800	2636300	1638000	0.0432552	0.0335041	0.02301	3	0.0332564	0.00826692	3341600	4147900	1765100	0.0268336	0.0479596	0.0249006	3	0.0332313	0.0104444
P161_RS0100755	P161_RS0100755	147	exopolyphosphatase			21	21	21	19	17	18	19	17	20	19	18	19	56.9	32.881	1150800000	59775000	44542000	101580000	104620000	59823000	56479000	318420000	253970000	151640000	17	48483000	2900800	2003900	4914600	0.0245845	0.0254671	0.0690384	3	0.0396967	0.0207509	5185600	2799000	2432900	0.0416412	0.0323631	0.0343213	3	0.0361086	0.00399301
P161_RS0100760	P161_RS0100760	148	OmpA family protein			51	51	51	38	36	38	47	34	36	40	39	37	84.1	41.818	18916000000	877900000	1.0145e+09	1.0211e+09	2396200000	1.0316e+09	730890000	6.097e+09	3.6062e+09	2.1403e+09	21	446780000	23238000	23040000	26618000	0.196944	0.292809	0.373919	3	0.287891	0.0723334	53505000	29269000	20846000	0.429654	0.33842	0.294078	3	0.35405	0.0564412
P161_RS17835	P161_RS17835	149	thioredoxin family protein			10	10	10	3	3	2	6	6	6	5	6	4	40.6	19.319	258070000	6676600	5419400	1202500	22817000	31197000	18732000	42203000	100880000	28940000	8	5824700	284410	42274	150320	0.0024104	0.000537249	0.00211164	3	0.00168643	0.000821696	469570	691740	207190	0.00377072	0.00799817	0.00292286	3	0.00489725	0.00221983
P161_RS0100770	P161_RS0100770	150	tetraacyldisaccharide 4'-kinase			10	10	10	3	3	0	4	6	3	5	5	2	33	39.35	50340000	1727800	1867100	0	7113900	2880000	1433000	15863000	16736000	2720100	20	1295900	48182	65807	0	0.000408347	0.000836324	0	2	0.000622336	0.000341459	322520	84403	46353	0.00258989	0.0009759	0.00065391	3	0.00140657	0.000846997
P161_RS0100775	P161_RS0100775	151	hypothetical protein			4	4	4	0	2	0	0	2	2	0	0	1	23.7	16.106	1325600	0	0	0	0	744890	580680	0	0	0	6	96781	0	0	0	0	0	0	0	0	0	0	124150	96781	0	0.00143547	0.00136531	2	0.00140039	0.000660771
P161_RS0100780	P161_RS0100780	152	Nif3-like dinuclear metal center hexameric protein			17	17	17	10	12	11	10	12	11	14	12	8	48.4	40.591	355410000	20336000	15853000	9501400	51483000	13765000	21740000	91205000	82136000	49389000	17	11711000	700290	555810	358950	0.00593502	0.00706365	0.00504239	3	0.00601369	0.000827047	1708300	637880	985410	0.0137179	0.00737542	0.0139013	3	0.0116649	0.00303404
P161_RS0100785	P161_RS0100785	153	hypothetical protein			51	51	51	39	35	39	40	29	35	45	42	40	92.2	29.44	8.4201e+09	530480000	545010000	687150000	1110500000	249160000	313950000	2.1323e+09	1351100000	1.5005e+09	17	170980000	11065000	10665000	15269000	0.0937769	0.135539	0.214493	3	0.147936	0.0500557	19178000	5719400	9188800	0.154002	0.0661299	0.129628	3	0.116587	0.03704
P161_RS0100795	P161_RS0100795	154	DUF349 domain-containing protein			79	79	79	52	52	36	44	38	31	57	60	60	74.5	77.165	3.3697e+09	293110000	239520000	149010000	198300000	141780000	165830000	1107500000	610560000	464070000	47	33080000	3466400	3073300	1997100	0.0293781	0.0390578	0.0280545	3	0.0321634	0.00490489	2222500	1875900	2148400	0.017847	0.0216899	0.0303078	3	0.0232816	0.00521013
P161_RS0100800	P161_RS0100800	155	shikimate dehydrogenase			17	17	17	8	9	7	9	13	9	14	13	13	67.7	28.538	310030000	18371000	17629000	9299300	40110000	25218000	15435000	59082000	64550000	60337000	15	17492000	1100900	1070200	593310	0.00933023	0.0136009	0.00833459	3	0.0104219	0.00228434	2307600	1445800	1029000	0.0185304	0.0167169	0.0145163	3	0.0165879	0.00164129
P161_RS0100805	P161_RS0100805	156	DUF368 domain-containing protein			2	2	2	2	1	1	0	1	0	0	0	0	4.8	37.662	2461200	984150	593260	584090	0	299730	0	0	0	0	9	273470	109350	65917	64899	0.000926751	0.000837722	0.000911676	3	0.00089205	3.89053e-05	0	33303	0	0	0.000385062	0	1	0	0
P161_RS0100810	P161_RS0100810	157	DUF368 domain-containing protein			7	7	7	6	4	4	4	5	4	6	6	5	18.4	36.811	180110000	12998000	12864000	8981800	12917000	14076000	4878400	35447000	40231000	37719000	10	12597000	1074900	1023100	672880	0.00910988	0.0130023	0.00945236	3	0.0105215	0.00175975	976190	927600	432270	0.00783896	0.0107253	0.00609811	3	0.00822078	0.00190823
P161_RS0100815	P161_RS0100815	158	MBL fold metallo-hydrolase			18	18	18	12	14	16	12	14	11	17	15	13	52.5	29.714	1081100000	44354000	43070000	42847000	88069000	45959000	45379000	338540000	322550000	110310000	11	27043000	1677000	1734200	1168500	0.0142127	0.0220395	0.0164146	3	0.0175556	0.00329555	1609100	1386500	1502000	0.0129213	0.0160313	0.021189	3	0.0167139	0.00340959
P161_RS0100820	P161_RS0100820	159	superoxide dismutase family protein			9	9	9	8	7	6	9	7	7	7	7	7	61.3	18.035	3.5125e+09	181480000	151670000	107220000	470620000	321950000	128170000	848380000	825400000	477610000	7	216750000	14389000	10943000	8211400	0.121948	0.139072	0.115351	3	0.125457	0.00999691	24215000	24320000	11826000	0.19445	0.281197	0.166831	3	0.21416	0.0487253
P161_RS0100825	P161_RS0100825	160	TIGR04255 family protein			16	16	16	10	10	9	6	8	8	13	10	10	65.3	30.725	886390000	20082000	120130000	63494000	43259000	19301000	71661000	253510000	195130000	99826000	11	27607000	1580000	3721000	2141600	0.0133906	0.0472892	0.0300844	3	0.0302547	0.0138396	2049700	1656000	490050	0.0164594	0.0191473	0.00691322	3	0.0141733	0.00524963
P161_RS0100830	P161_RS0100830	161	hypothetical protein			9	9	9	7	5	3	1	1	4	4	3	6	36.9	24.471	47428000	6274100	3224300	3602400	444200	802880	2133700	10770000	6495200	13681000	7	4473000	751660	256140	421690	0.00637039	0.00325522	0.00592374	3	0.00518311	0.00137537	63457	114700	59288	0.00050957	0.00132621	0.000836386	3	0.000890721	0.000335597
P161_RS0100835	P161_RS0100835	162	hypothetical protein			13	13	13	8	4	4	6	6	3	8	4	5	60.5	20.485	66294000	10338000	2736300	1807400	4904900	5103300	862000	19567000	12334000	8641600	14	2568300	406120	133000	129100	0.0034419	0.00169026	0.00181355	3	0.00231524	0.000798262	121620	121860	44371	0.000976628	0.00140899	0.000625949	3	0.00100386	0.000320256
P161_RS0100840	P161_RS0100840	163	hypothetical protein			29	29	29	18	18	19	20	21	19	24	21	21	72.5	44.062	1345700000	76916000	82689000	60717000	220810000	60016000	95198000	289460000	343360000	116580000	22	38074000	2406800	2983500	2181000	0.0203979	0.0379165	0.0306378	3	0.0296507	0.00718595	6124700	1950800	2511700	0.0491823	0.0225559	0.035433	3	0.0357237	0.0108721
P161_RS0100845	P161_RS0100845	164	glutamine synthetase			34	34	34	20	16	13	22	20	22	23	21	23	48.6	82.37	584100000	39510000	30153000	23522000	50347000	36293000	34556000	194570000	98306000	76841000	35	10074000	737690	554900	549110	0.00625199	0.00705208	0.00771368	3	0.00700592	0.000597626	936810	748230	688610	0.00752273	0.00865133	0.00971434	3	0.00862947	0.000894853
P161_RS0100850	P161_RS0100850	165	glutamine synthetase			25	25	25	18	18	17	18	19	15	22	23	18	73.6	38.342	6.1335e+09	325370000	247260000	269180000	557240000	289570000	246090000	1.9851e+09	1.498e+09	715650000	14	195680000	12964000	9940000	10355000	0.109871	0.126325	0.145463	3	0.12722	0.0145441	19613000	11099000	8380100	0.157495	0.128331	0.11822	3	0.134682	0.0166514
P161_RS0100855	P161_RS0100855	166	HAMP domain-containing protein	HK|Classic		6	6	6	0	4	1	3	0	0	1	0	0	11.5	63.08	3324200	0	2254400	82133	232910	0	0	754750	0	0	32	57752	0	47907	2566.7	0	0.000608838	3.6056e-05	2	0.000322447	0.000278899	7278.5	0	0	5.84475e-05	0	0	1	0	0
P161_RS0100860	P161_RS0100860	167	response regulator transcription factor	RR|NarL		6	6	6	1	1	1	1	1	3	5	1	2	38.5	23.394	64646000	163350	0	355370	565430	36060000	7038900	15148000	0	5315000	13	168040	12565	0	27336	0.00010649	0	0.000384005	2	0.000245248	0.000161869	43495	2773900	15456	0.000349272	0.0320729	0.00021804	3	0.0108801	0.0149857
P161_RS0100875	P161_RS0100875	169	DUF4136 domain-containing protein			15	15	15	14	13	11	14	14	12	13	12	13	49.7	21.13	5552600000	559330000	278020000	181090000	765760000	625730000	285910000	772120000	1137100000	947550000	7	588190000	61207000	35710000	23149000	0.518735	0.453829	0.325188	3	0.432584	0.0804305	84152000	67548000	34705000	0.675754	0.781016	0.489589	3	0.648787	0.120493
P161_RS0100885	P161_RS0100885	170	D-alanyl-D-alanine carboxypeptidase family protein			4	4	4	2	1	2	3	3	3	3	4	3	22.9	22.829	63194000	1280800	1753400	745220	5381600	2340700	4223000	9996100	21443000	16030000	12	5266100	106730	146110	62102	0.000904547	0.00185687	0.000872385	3	0.00121127	0.000456701	448470	195060	351910	0.00360129	0.00225536	0.00496445	3	0.00360703	0.00110599
P161_RS0100890	P161_RS0100890	171	methylmalonyl-CoA mutase family protein			79	79	79	54	60	60	52	47	49	48	54	57	71.2	131.92	1.9887e+09	140870000	168920000	115400000	190990000	106890000	197960000	366580000	272580000	428560000	60	21294000	1631200	1862000	1248000	0.0138246	0.0236637	0.0175314	3	0.0183399	0.00405728	2097900	1321300	1946100	0.0168465	0.0152774	0.027454	3	0.0198593	0.00540833
P161_RS0100900	P161_RS0100900	172	carboxypeptidase-like regulatory domain-containing protein			3	3	3	1	1	0	0	1	2	1	2	1	7	65.148	23478000	1067600	1103300	0	0	2484400	8214000	667970	7527200	2413100	28	210020	38129	39405	0	0.000323147	0.000500788	0	2	0.000411967	0.000207302	0	88729	293360	0	0.00102592	0.00413848	2	0.0025822	0.00175966
P161_RS0100920	P161_RS0100920	175	transcriptional regulator	TR|TrmB		7	7	7	5	3	2	4	2	4	4	6	4	34.1	19.366	66786000	7550700	2589600	1632200	4177000	5553100	3051800	12753000	21680000	7798500	15	3387800	366850	172640	108810	0.00310909	0.00219404	0.00152852	3	0.00227722	0.000647939	184890	370210	175850	0.0014847	0.00428051	0.00248075	3	0.00274865	0.001157
P161_RS0100925	P161_RS0100925	176	peptidylprolyl isomerase			5	5	5	4	4	4	4	4	4	4	5	5	63.3	15.789	1.8176e+09	310250000	106560000	74129000	96053000	67761000	58357000	344660000	400430000	359360000	5	173540000	30333000	12223000	6342600	0.257075	0.155339	0.0890984	3	0.167171	0.0690846	13817000	8349300	3980400	0.110953	0.0965379	0.0561522	3	0.0878809	0.0231946
P161_RS0100930	P161_RS0100930	177	sigma-70 family RNA polymerase sigma factor	SF|Ecf		6	6	6	2	2	0	1	0	0	1	0	3	35.8	20.677	26712000	2498800	425240	0	404010	0	0	0	0	23384000	8	90797	40297	53155	0	0.000341521	0.000675533	0	2	0.000508527	0.000275791	50501	0	0	0.000405531	0	0	1	0	0
P161_RS0100940	P161_RS0100940	179	dienelactone hydrolase family protein			8	8	8	2	2	2	3	2	1	7	4	3	27.1	33.138	38806000	3341100	2263100	4021800	1812500	1410500	955840	11328000	9183700	4489100	15	1769200	222740	150870	268120	0.00188774	0.00191737	0.00376645	3	0.00252385	0.00087873	120840	94033	63723	0.000970364	0.00108725	0.000898951	3	0.000985521	7.76146e-05
P161_RS0100945	P161_RS0100945	180	zinc carboxypeptidase			43	43	43	28	29	30	33	33	31	32	36	35	54.7	95.79	1.9918e+09	94323000	59376000	48174000	192370000	105760000	125500000	570550000	355700000	440010000	48	28173000	1477900	915950	814500	0.0125253	0.0116406	0.0114418	3	0.0118692	0.000470984	2775700	1741100	1929500	0.0222893	0.0201313	0.0272198	3	0.0232135	0.00296674
P161_RS0100950	P161_RS0100950	181	class I SAM-dependent methyltransferase			12	12	12	7	5	5	8	6	6	7	10	4	38.1	31.166	100780000	6469700	5804100	3983100	14242000	4036900	7167700	21506000	25207000	12366000	17	5293500	380570	341420	234300	0.00322537	0.00433902	0.00329136	3	0.00361858	0.000510139	764950	237460	421630	0.00614267	0.00274561	0.00594801	3	0.00494543	0.00155754
P161_RS0100955	P161_RS0100955	182	hypothetical protein			25	25	25	14	14	14	14	13	11	17	20	18	75.6	28.904	424510000	27768000	33548000	25328000	40015000	9967700	10229000	105920000	84219000	87513000	15	12006000	1030500	933260	723880	0.00873358	0.0118606	0.0101688	3	0.0102543	0.00127802	1296100	544920	497210	0.0104079	0.00630058	0.00701423	3	0.00790756	0.00179184
P161_RS0100960	P161_RS0100960	183	hypothetical protein			22	22	22	12	11	13	12	14	11	15	14	12	57.2	35.034	385430000	25199000	23576000	36901000	50284000	13874000	25937000	94627000	59864000	55172000	17	13441000	1205600	1132900	1297400	0.0102176	0.0143977	0.0182254	3	0.0142802	0.00327023	1709400	698080	1065400	0.0137268	0.00807147	0.0150298	3	0.012276	0.00302027
P161_RS0100965	P161_RS0100965	184	citrate synthase			52	52	52	44	44	39	41	35	39	43	39	42	82.5	47.813	24516000000	3.7802e+09	2290600000	1145100000	4542700000	777890000	2207700000	4414000000	2619000000	2739000000	18	535830000	85496000	56097000	33415000	0.724586	0.712922	0.469401	3	0.635637	0.117643	102710000	20269000	46978000	0.824778	0.234358	0.662727	3	0.573954	0.249077
P161_RS0100970	P161_RS0100970	185	phosphopyruvate hydratase			44	44	44	30	29	28	36	36	36	38	39	38	91.6	46.138	21034000000	945560000	572510000	281100000	3.0527e+09	924420000	1.9022e+09	5290500000	3.6796e+09	4385800000	19	482070000	22768000	11984000	9535400	0.192961	0.152302	0.13395	3	0.159737	0.0246584	60434000	21598000	43118000	0.485295	0.249725	0.608273	3	0.447764	0.148763
P161_RS0100975	P161_RS0100975	186	glutamine-hydrolyzing carbamoyl-phosphate synthase small subunit			19	19	19	12	10	10	14	15	13	14	15	14	49.5	41.182	1420400000	67417000	39717000	33601000	62630000	57075000	34622000	328830000	637360000	159150000	15	32172000	1801600	1835800	1358500	0.0152687	0.0233307	0.0190837	3	0.0192277	0.00329287	2446800	1740700	1060500	0.0196482	0.0201267	0.0149607	3	0.0182452	0.0023307
P161_RS0100980	P161_RS0100980	187	50S ribosomal protein L17			19	19	19	15	14	15	15	14	11	17	15	13	74.4	18.156	7.323e+09	800690000	511410000	346440000	828020000	506040000	218810000	1377300000	1.5894e+09	1145000000	8	563260000	63898000	28703000	20666000	0.541541	0.364779	0.290308	3	0.398876	0.105361	46291000	49340000	18247000	0.371724	0.570488	0.257414	3	0.399875	0.129353
P161_RS0100985	P161_RS0100985	188	DNA-directed RNA polymerase subunit alpha			43	43	43	33	33	31	38	29	33	34	31	31	90.3	37.21	22146000000	2626800000	1392200000	1262700000	4.0868e+09	903200000	1.9421e+09	4625100000	2730300000	2577100000	20	593380000	70867000	45337000	35136000	0.600604	0.576176	0.493577	3	0.556786	0.0457946	94490000	30653000	56161000	0.75877	0.354422	0.792273	3	0.635155	0.198979
P161_RS0100990	P161_RS0100990	189	30S ribosomal protein S4			29	29	29	26	23	22	25	21	21	24	27	26	86.6	22.742	11504000000	1382800000	878520000	709980000	1.0734e+09	681300000	243010000	1.8998e+09	3.0684e+09	1.5672e+09	13	458780000	57341000	28996000	18401000	0.48597	0.368503	0.25849	3	0.370988	0.092885	39264000	36480000	12294000	0.315296	0.421796	0.173434	3	0.303509	0.101736
P161_RS0100995	P161_RS0100995	190	30S ribosomal protein S11			6	6	6	6	6	5	5	5	4	6	5	5	29.1	13.62	1.4942e+09	185710000	69478000	41982000	96880000	83321000	28764000	353590000	383710000	250710000	4	153940000	19829000	9134800	4145800	0.168053	0.116092	0.0582386	3	0.114128	0.0448529	11053000	9427800	3851200	0.0887573	0.109008	0.0543295	3	0.0840316	0.0225711
P161_RS0101000	P161_RS0101000	191	30S ribosomal protein S13			16	16	16	13	11	11	12	11	9	8	13	10	60.3	13.696	1435400000	244910000	103060000	68460000	122260000	121420000	53149000	223250000	329960000	168900000	7	175820000	25004000	13551000	9526600	0.211911	0.172216	0.133826	3	0.172651	0.0318796	13574000	16339000	6152000	0.109001	0.188918	0.0867873	3	0.128236	0.0438568
P161_RS0101010	P161_RS0101010	193	translation initiation factor IF-1			4	4	4	3	3	2	2	2	2	3	2	2	67.6	8.0974	165840000	14908000	11512000	6465000	13763000	5658300	3946600	32631000	43864000	33095000	3	48803000	4310500	3545800	2045300	0.0365319	0.0450627	0.0287316	3	0.0367754	0.00666936	4197100	1387100	1229100	0.0337034	0.0160382	0.0173391	3	0.0223602	0.00803838
P161_RS0101015	P161_RS0101015	194	preprotein translocase subunit SecY			17	17	17	12	12	13	13	13	13	14	10	13	27.3	47.432	5170900000	377080000	383810000	442430000	373290000	258000000	180680000	1.6436e+09	912460000	599560000	13	263770000	21519000	19157000	20828000	0.182376	0.243461	0.292584	3	0.239474	0.0450806	20771000	15828000	10278000	0.166794	0.18301	0.144994	3	0.164932	0.0155757
P161_RS0101020	P161_RS0101020	195	50S ribosomal protein L15			17	17	17	13	12	11	11	10	11	13	11	11	77.9	15.79	5.9576e+09	694370000	297960000	260250000	474570000	410050000	150190000	1320000000	1.4841e+09	866070000	8	511380000	52224000	29444000	23247000	0.442603	0.374196	0.326565	3	0.381121	0.0476249	44678000	38375000	16609000	0.358771	0.443707	0.234306	3	0.345595	0.0859937
P161_RS0101025	P161_RS0101025	196	50S ribosomal protein L30			5	5	5	3	4	4	3	4	3	5	4	4	66.7	6.812	775670000	58883000	56610000	32919000	58766000	36435000	15782000	206750000	185190000	124330000	3	205190000	12998000	16640000	9656500	0.110159	0.211473	0.135651	3	0.152428	0.043029	16721000	10854000	4396400	0.134272	0.125498	0.0620208	3	0.107264	0.0321915
P161_RS0101030	P161_RS0101030	197	30S ribosomal protein S5			18	18	18	14	14	15	17	15	11	16	16	16	69	18.025	5.8515e+09	503820000	275960000	238900000	519750000	595600000	159340000	1078300000	1.5537e+09	926150000	9	255240000	24310000	11391000	11670000	0.206029	0.144765	0.163936	3	0.171577	0.025588	21987000	33607000	8069000	0.176559	0.388577	0.113831	3	0.226322	0.117555
P161_RS0101035	P161_RS0101035	198	50S ribosomal protein L18			17	17	17	12	12	11	12	15	10	14	15	13	77.6	12.879	4.174e+09	490330000	341370000	284420000	326220000	409180000	167150000	685120000	869920000	600330000	6	343950000	44620000	24378000	19602000	0.378159	0.309814	0.275361	3	0.321111	0.0427204	15599000	34764000	11008000	0.125262	0.401955	0.155292	3	0.227503	0.123964
P161_RS0101040	P161_RS0101040	199	50S ribosomal protein L6			27	27	27	21	20	18	19	15	13	18	21	17	92.8	19.532	8963100000	1111200000	524140000	394640000	603250000	558570000	196920000	1.6168e+09	2243600000	1.714e+09	11	563140000	73694000	34614000	28051000	0.624563	0.4399	0.39405	3	0.486171	0.0996323	39341000	43611000	15998000	0.315914	0.504247	0.225687	3	0.348616	0.116049
P161_RS0101045	P161_RS0101045	200	30S ribosomal protein S8			18	18	18	16	15	15	14	15	12	14	15	12	91.7	14.803	6.6074e+09	946010000	622280000	499390000	563190000	386300000	156220000	1117400000	1.4981e+09	818500000	8	528900000	84779000	39870000	33863000	0.71851	0.506698	0.475694	3	0.566967	0.107902	43536000	30648000	12886000	0.349601	0.354364	0.181785	3	0.29525	0.0802555
P161_RS0101050	P161_RS0101050	201	30S ribosomal protein S14			9	9	9	8	7	7	8	8	7	9	8	8	47.2	10.29	5039700000	486350000	203220000	75187000	296340000	335640000	41735000	1301000000	1.5222e+09	777990000	2	432150000	56210000	27185000	23657000	0.476385	0.345487	0.332324	3	0.384732	0.0650307	36677000	38099000	12393000	0.294522	0.440516	0.17483	3	0.303289	0.108643
P161_RS0101055	P161_RS0101055	202	50S ribosomal protein L5			37	37	37	25	26	27	29	26	26	29	30	29	96.7	20.413	14643000000	1.8151e+09	1285400000	957200000	2467300000	884410000	652670000	1.7052e+09	2.983e+09	1.893e+09	11	885930000	112290000	78880000	63613000	0.951668	1.00247	0.893611	3	0.949248	0.0444728	159510000	62124000	50475000	1.28089	0.718302	0.71206	3	0.903751	0.26669
P161_RS0101060	P161_RS0101060	203	50S ribosomal protein L24			14	14	14	12	10	11	11	8	9	13	10	11	87	10.886	3.8032e+09	364280000	225290000	147170000	269260000	293770000	101300000	726980000	1.0131e+09	662070000	4	740240000	73784000	44442000	29966000	0.625326	0.564802	0.420951	3	0.537026	0.0857164	48603000	61693000	20288000	0.39029	0.713319	0.286206	3	0.463272	0.181844
P161_RS0101065	P161_RS0101065	204	50S ribosomal protein L14			17	17	17	11	13	11	12	11	10	12	11	11	75.4	13.53	3.6421e+09	342210000	259390000	142250000	229800000	364130000	123870000	723820000	873140000	583490000	7	342050000	36901000	29137000	15688000	0.312739	0.370295	0.220379	3	0.301138	0.0617502	22694000	37693000	12856000	0.182236	0.435821	0.181362	3	0.266473	0.119748
P161_RS0101070	P161_RS0101070	205	30S ribosomal protein S17			11	11	11	10	10	7	7	7	7	11	10	10	70.6	10.091	1.6061e+09	190320000	139810000	62174000	91583000	252610000	49574000	276220000	371070000	172720000	5	163130000	19925000	17008000	9617500	0.168866	0.21615	0.135103	3	0.173373	0.0332406	10833000	20931000	6958200	0.0869907	0.242012	0.0981605	3	0.142388	0.0705926
P161_RS0101080	P161_RS0101080	207	50S ribosomal protein L16			13	13	13	10	8	9	12	11	9	9	10	9	75.5	15.889	9280400000	959400000	386910000	391540000	1192700000	735700000	266890000	1.5123e+09	2598200000	1236800000	6	1201900000	137570000	31900000	48494000	1.16592	0.405409	0.681225	3	0.750851	0.314356	106390000	105810000	29561000	0.854329	1.22342	0.417022	3	0.831589	0.329602
P161_RS0101085	P161_RS0101085	208	30S ribosomal protein S3			30	30	30	23	24	20	21	22	19	25	26	25	74.2	26.899	5.8392e+09	439250000	500980000	257950000	494340000	502850000	339000000	1165300000	1166200000	973380000	13	348760000	29285000	30084000	15199000	0.248193	0.38233	0.21351	3	0.281344	0.0727979	33558000	33176000	15293000	0.269476	0.383594	0.215741	3	0.289604	0.069988
P161_RS0101090	P161_RS0101090	209	50S ribosomal protein L22			22	22	22	16	17	14	19	15	13	19	16	18	87.3	14.977	6.6262e+09	800240000	472350000	253140000	386450000	643470000	185210000	1097300000	1.6566e+09	1131500000	8	589330000	72495000	41039000	22569000	0.614402	0.521554	0.317041	3	0.484332	0.124218	24835000	62021000	19810000	0.199429	0.717111	0.279463	3	0.398668	0.227532
P161_RS0101095	P161_RS0101095	210	30S ribosomal protein S19			9	9	9	6	6	5	7	8	6	6	6	7	72.8	10.227	4693500000	504570000	115780000	202500000	307170000	337580000	128500000	1.0542e+09	1353200000	690020000	5	491790000	57506000	11902000	30347000	0.487369	0.151259	0.426303	3	0.354977	0.146191	43567000	38234000	16180000	0.34985	0.442076	0.228254	3	0.34006	0.0875667
P161_RS0101100	P161_RS0101100	211	50S ribosomal protein L2			20	20	20	18	17	18	15	15	16	17	16	17	47.4	29.864	9184300000	542720000	1.0384e+09	778740000	1.4581e+09	224630000	841260000	1.766e+09	1254100000	1280400000	12	262950000	23309000	26518000	22827000	0.197546	0.33701	0.320665	3	0.285074	0.0622502	28126000	11212000	12860000	0.225856	0.129638	0.181418	3	0.178971	0.0393192
P161_RS0101105	P161_RS0101105	212	50S ribosomal protein L23			14	14	14	12	12	11	10	14	13	13	13	10	88.5	10.749	6.4572e+09	768050000	441590000	301420000	414620000	584520000	160400000	1414500000	1.5594e+09	812630000	6	710910000	91311000	54127000	37590000	0.773869	0.687886	0.52805	3	0.663268	0.101854	44212000	68500000	21630000	0.355029	0.792024	0.305138	3	0.484064	0.218711
P161_RS0101110	P161_RS0101110	213	50S ribosomal protein L4			31	31	31	27	24	23	26	20	21	26	28	30	72.7	23.191	7.8955e+09	824680000	710930000	585670000	869910000	463800000	409360000	1306500000	1369700000	1355000000	10	447930000	53106000	43357000	35078000	0.450078	0.551013	0.492762	3	0.497951	0.0413695	40062000	33727000	22205000	0.321704	0.389965	0.31325	3	0.34164	0.0343449
P161_RS0101115	P161_RS0101115	214	50S ribosomal protein L3			26	26	26	20	20	18	20	15	17	22	21	22	74.1	21.98	7.9685e+09	757100000	668360000	413930000	530850000	510080000	211840000	1.7124e+09	1.8227e+09	1341200000	13	421530000	42734000	33476000	17796000	0.362175	0.425438	0.249991	3	0.345868	0.072548	30039000	32754000	11487000	0.241218	0.378715	0.162049	3	0.260661	0.0895153
P161_RS0101120	P161_RS0101120	215	30S ribosomal protein S10			18	18	18	15	15	13	12	15	13	16	14	12	76.2	11.401	4.2277e+09	576330000	298980000	142700000	305150000	307420000	101130000	903510000	944140000	648340000	6	450150000	62829000	30973000	20447000	0.532482	0.393628	0.287231	3	0.404447	0.100415	29873000	36523000	13088000	0.239885	0.422293	0.184635	3	0.282271	0.101547
P161_RS0101125	P161_RS0101125	216	elongation factor G			75	75	75	57	58	53	64	61	58	69	67	65	93	78.005	51998000000	4344100000	3.0328e+09	1.7581e+09	4.1859e+09	3.0547e+09	3.9866e+09	13977000000	7.9703e+09	9688500000	38	616540000	57090000	37508000	22360000	0.483843	0.47668	0.314105	3	0.424876	0.0783816	56513000	37386000	40907000	0.453808	0.432272	0.577082	3	0.487721	0.0637969
P161_RS0101130	P161_RS0101130	217	30S ribosomal protein S7			19	19	19	16	15	15	13	12	13	13	16	14	79.2	18.379	7.8483e+09	1200500000	549180000	333620000	513860000	550490000	228980000	1311800000	1.6257e+09	1.5342e+09	10	437070000	73955000	34734000	22030000	0.626775	0.441425	0.309469	3	0.459223	0.13015	30065000	36883000	14499000	0.241427	0.426456	0.20454	3	0.290807	0.0970927
P161_RS0101135	P161_RS0101135	218	30S ribosomal protein S12			9	9	9	7	6	5	8	6	5	7	5	6	62.1	13.747	4939600000	645760000	321130000	233380000	341030000	572690000	127910000	709650000	1181600000	806470000	5	909490000	119520000	63745000	46676000	1.01294	0.810119	0.655686	3	0.826249	0.146295	66865000	112690000	25582000	0.536937	1.30297	0.36089	3	0.733597	0.408969
P161_RS0101140	P161_RS0101140	219	hypothetical protein			7	7	7	1	2	1	4	3	3	1	3	0	15.4	56.695	10946000	137580	1023700	313240	2017100	2848900	444670	0	4160400	0	25	437830	5503.3	40948	12530	4.6641e-05	0.000520398	0.000176017	3	0.000247685	0.000199939	80685	113960	17787	0.000647913	0.00131765	0.000250924	3	0.000738829	0.000440208
P161_RS0101145	P161_RS0101145	220	SusC/RagA family TonB-linked outer membrane protein	SusC-like		81	81	81	65	67	63	71	71	70	65	76	74	85.5	110.07	199230000000	15701000000	10170000000	8752200000	18982000000	16291000000	15796000000	36220000000	32101000000	45222000000	36	2506200000	179580000	124590000	120570000	1.52196	1.58338	1.69372	3	1.59969	0.0710635	250990000	189130000	211520000	2.01549	2.18679	2.98395	3	2.39541	0.421995
P161_RS18910	P161_RS18910	221	RagB/SusD family nutrient uptake outer membrane protein	SusD-like		60	60	60	51	46	51	50	48	48	56	55	55	90.5	55.274	179180000000	13142000000	5212100000	14771000000	16612000000	15078000000	7.7477e+09	33400000000	25245000000	47971000000	27	2726600000	237920000	81756000	241940000	2.01639	1.03902	3.39868	3	2.15136	0.968044	251070000	257090000	124320000	2.01613	2.97258	1.7538	3	2.2475	0.523769
P161_RS0101155	P161_RS0101155	222	hypothetical protein			4	4	4	4	2	2	3	2	4	4	4	4	27.7	29.245	1316600000	37565000	29281000	14010000	48906000	29850000	51229000	362550000	349680000	393490000	2	69529000	2126800	1778000	2430500	0.0180248	0.0225961	0.0341427	3	0.0249212	0.00678238	14122000	3176500	378980	0.113402	0.0367279	0.00534634	3	0.0518254	0.0453869
P161_RS0101160	P161_RS0101160	223	23S rRNA (guanosine(2251)-2'-O)-methyltransferase RlmB			19	19	19	11	9	8	10	12	8	17	15	14	76.7	27.031	457650000	17043000	17264000	14845000	33695000	21540000	10809000	159620000	81874000	100970000	15	23320000	1136200	1109000	858830	0.0096294	0.014094	0.0120645	3	0.0119293	0.00182517	2058400	1241300	694850	0.0165293	0.0143524	0.00980237	3	0.0135613	0.00280264
P161_RS0101170	P161_RS0101170	225	replication-associated recombination protein A			13	13	13	8	6	7	9	9	10	11	9	9	40.9	47.199	186590000	12925000	3755100	3710400	33044000	7360100	18120000	34361000	31851000	41466000	22	3267000	322350	93356	115160	0.00273195	0.00118644	0.00161772	3	0.00184537	0.000651161	730020	156810	467060	0.00586218	0.0018131	0.0065889	3	0.00475472	0.00210109
P161_RS0101175	P161_RS0101175	226	hypothetical protein			17	17	17	8	5	6	12	9	13	15	11	11	62.5	30.666	252260000	8755200	5737800	1873700	24599000	8901200	24163000	80715000	42076000	55442000	11	12333000	672160	521620	158040	0.00569662	0.00662913	0.00222008	3	0.00484861	0.00189724	1612100	675740	1140000	0.0129454	0.00781317	0.0160822	3	0.0122803	0.00340842
P161_RS0101180	P161_RS0101180	227	hypothetical protein			4	4	4	1	2	1	2	2	2	1	0	2	10.3	51.802	19718000	1751800	1119000	465760	4182900	2674000	3595600	4064000	0	1864700	19	766150	92202	37343	24513	0.00078142	0.000474583	0.000344349	3	0.000533451	0.000183225	162900	100910	134380	0.00130811	0.00116676	0.00189572	3	0.00145687	0.000315638
P161_RS0101190	P161_RS0101190	229	noncanonical pyrimidine nucleotidase, YjjG family			4	4	4	1	2	2	1	3	2	3	4	4	16.2	26.802	51593000	1351900	2119600	1127700	13240000	2861600	320910	18874000	6463900	5233300	7	6899400	193130	302790	161100	0.00163679	0.00384808	0.00226307	3	0.00258265	0.000930607	1891500	202870	45844	0.015189	0.00234566	0.000646729	3	0.00606048	0.00649203
P161_RS17845	P161_RS17845	231	hypothetical protein			4	4	4	0	0	0	3	0	1	3	1	0	18.2	23.172	5674400	0	0	0	1491300	0	248210	3934900	0	0	6	637680	0	0	0	0	0	0	0	0	0	248560	0	41368	0.00199598	0	0.000583585	2	0.00128978	0.000837943
P161_RS0101205	P161_RS0101205	232	hypothetical protein			7	7	7	1	2	3	4	2	2	4	3	2	24.2	35.626	37955000	3563500	5141100	2537800	3562500	1563800	1626300	8518600	8062400	3379300	16	2268000	222720	321320	158610	0.00188757	0.00408357	0.00222809	3	0.00273308	0.000965009	215990	97736	101640	0.00173443	0.00113006	0.00143385	3	0.00143278	0.000246735
P161_RS0101210	P161_RS0101210	233	hypothetical protein			14	14	14	5	5	4	7	9	9	3	5	6	30.2	51.193	85484000	5055200	5239600	2117000	19692000	4070000	13712000	8429300	11091000	16078000	25	2616400	97100	174480	74750	0.000822931	0.00221742	0.00105006	3	0.00136347	0.000610912	611960	63496	460350	0.00491414	0.000734166	0.00649424	3	0.00404751	0.00243007
P161_RS0101215	P161_RS0101215	234	JAB domain-containing protein			5	5	5	1	0	0	2	3	0	4	4	3	24.6	25.08	12022000	0	0	0	593280	1630000	0	4005500	3550900	2242800	13	850680	0	0	0	0	0	0	0	0	0	23846	125390	0	0.000191487	0.00144981	0	2	0.000820648	0.000643081
P161_RS0101220	P161_RS0101220	235	Trk system potassium transporter TrkA			14	14	14	9	8	10	6	9	12	11	10	8	33.3	49.831	485200000	41754000	22640000	32509000	55802000	19530000	57558000	91572000	73450000	90383000	24	19480000	1714600	925120	1312400	0.0145314	0.0117571	0.0184361	3	0.0149082	0.00273967	2325100	794420	2149000	0.0186709	0.00918539	0.0303163	3	0.0193909	0.00864167
P161_RS0101230	P161_RS0101230	237	T9SS type A sorting domain-containing protein			12	12	12	3	4	6	8	10	8	5	9	5	18.1	108.23	282830000	5786900	4475100	3842100	33895000	17648000	20019000	38819000	65120000	93227000	19	2125100	23702	11479	7828.4	0.000200877	0.000145884	0.00010997	3	0.000152244	3.73838e-05	253100	209150	276470	0.00203243	0.00241827	0.00390021	3	0.00278364	0.000805095
P161_RS0101240	P161_RS0101240	239	hypothetical protein			16	16	16	3	5	6	8	9	7	7	8	11	40.5	43.853	201700000	5151600	6094600	3776800	27738000	9327700	17850000	51134000	34123000	46502000	21	7572300	206350	231770	179850	0.00174884	0.00294551	0.00252646	3	0.00240693	0.000495796	997340	372000	673780	0.0080088	0.00430121	0.00950513	3	0.00727171	0.00218749
P161_RS0101245	P161_RS0101245	240	nucleotidyltransferase family protein			13	13	13	4	2	3	4	5	5	10	8	7	33	43.535	65925000	1184200	367700	1456800	1409800	2382400	1482000	26814000	20069000	10760000	22	2829000	53827	16713	66217	0.000456189	0.000212401	0.000930191	3	0.000532927	0.000298018	64082	108290	67364	0.000514589	0.00125209	0.000950316	3	0.000905665	0.000302735
P161_RS0101250	P161_RS0101250	241	peptidoglycan synthetase			26	26	26	18	15	16	18	13	15	16	19	15	54.4	51.138	1.0546e+09	69643000	22267000	80868000	68879000	51255000	29915000	217510000	189480000	324810000	25	17984000	1469700	636020	1594700	0.0124558	0.00808301	0.0224017	3	0.0143135	0.00599136	1217000	1384000	725810	0.0097727	0.0160023	0.0102391	3	0.0120047	0.00283315
P161_RS0101255	P161_RS0101255	242	TonB-dependent receptor plug domain-containing protein	putative SusC-like		130	130	130	45	79	59	100	102	83	114	98	100	57	250.71	4352600000	32201000	83706000	82357000	719910000	446120000	333000000	1191900000	647080000	816330000	123	28591000	197310	592490	579070	0.00167222	0.0075298	0.00813455	3	0.00577886	0.00291431	4629100	3039600	2270600	0.0371724	0.035145	0.0320317	3	0.0347831	0.00211422
P161_RS0101265	P161_RS0101265	245	hypothetical protein			6	6	6	6	6	5	5	4	5	4	5	5	32.7	17.463	1.9381e+09	152830000	84351000	77919000	177420000	133590000	55122000	331210000	501950000	423710000	7	244530000	19955000	11060000	10050000	0.16912	0.140559	0.141178	3	0.150286	0.0133205	21888000	18005000	7400900	0.175764	0.208181	0.104406	3	0.162784	0.0433489
P161_RS0101270	P161_RS0101270	246	DUF4136 domain-containing protein			7	7	7	4	3	3	3	5	3	4	3	5	49.1	19.46	38179000	5284700	743430	1264900	3071400	5515200	1371900	7048700	2890300	10989000	9	2225400	245460	82603	140550	0.0020803	0.00104978	0.00197439	3	0.00170149	0.000462852	341270	327200	152440	0.00274045	0.00378321	0.0021505	3	0.00289139	0.000675044
P161_RS0101275	P161_RS0101275	247	M20/M25/M40 family metallo-hydrolase			24	24	24	12	17	15	18	15	14	20	19	19	68.7	36.6	1.5168e+09	49241000	65120000	86445000	174280000	71740000	48299000	434190000	417600000	169880000	19	48545000	1949100	2471100	3036000	0.0165188	0.0314046	0.0426485	3	0.0301906	0.0107019	5678900	2238700	1635700	0.0456025	0.0258847	0.0230751	3	0.0315208	0.0100231
P161_RS0101280	P161_RS0101280	248	3-deoxy-8-phosphooctulonate synthase			26	26	26	16	19	16	18	17	18	20	22	20	87.2	29.951	1.9725e+09	214330000	189790000	127120000	296840000	62269000	134320000	277260000	275520000	395010000	15	71089000	8919700	8399000	5670900	0.0755953	0.106741	0.0796626	3	0.0873329	0.0138235	12717000	2421400	3820100	0.10212	0.0279972	0.0538908	3	0.0613358	0.0307148
P161_RS0101285	P161_RS0101285	249	transglutaminase			15	15	15	6	6	3	5	11	8	5	8	6	48.9	37.198	122240000	9760900	6892800	2991900	16125000	9560500	11619000	18685000	26599000	20010000	17	4568000	322080	350070	146660	0.00272966	0.00444895	0.00206022	3	0.00307961	0.0010061	726900	377480	442870	0.00583712	0.00436457	0.00624764	3	0.00548311	0.000808489
P161_RS0101300	P161_RS0101300	252	universal stress protein			9	9	9	3	4	5	7	8	6	6	4	4	50.3	16.808	158100000	5376500	4387900	3584300	26068000	26067000	10978000	35991000	25601000	20050000	9	14700000	597380	417870	367590	0.00506285	0.0053106	0.00516376	3	0.00517907	0.000101722	2507700	2562000	1052300	0.0201372	0.0296228	0.014845	3	0.021535	0.00611347
P161_RS0101305	P161_RS0101305	253	hypothetical protein			3	3	3	1	1	1	0	0	0	1	0	0	16.3	22.679	4015000	143560	258680	327210	0	0	0	3285500	0	0	7	573570	20509	36954	46744	0.000173816	0.000469639	0.000656641	3	0.000433365	0.000198775	0	0	0	0	0	0	0	0	0
P161_RS0101340	P161_RS0101340	260	mechanosensitive ion channel			6	6	6	5	4	4	5	5	4	5	6	5	25.1	32.712	53063000	3980000	2586600	2013400	3325300	3863600	881940	15402000	11039000	9971800	11	2842800	257830	235150	153040	0.00218513	0.00298846	0.00214985	3	0.00244115	0.000387278	81261	245570	80177	0.000652539	0.00283938	0.00113107	3	0.001541	0.000938649
P161_RS0101350	P161_RS0101350	262	alanine dehydrogenase			17	17	17	13	14	12	16	13	15	14	11	13	45.9	45.787	699550000	57724000	24809000	27853000	100490000	34850000	95596000	160410000	79822000	118000000	26	19846000	1801100	737350	686160	0.0152645	0.00937079	0.00963891	3	0.0114247	0.00271732	2835300	976670	2801100	0.0227679	0.0112926	0.0395156	3	0.0245254	0.0115888
P161_RS0101355	P161_RS0101355	263	HVA1 family protein			3	3	3	1	1	1	1	1	2	3	1	0	28.6	7.9017	25048000	1599600	1067300	448940	1461400	1320400	1610800	12652000	4887700	0	5	3173700	319920	213470	89789	0.00271135	0.00271294	0.00126132	3	0.00222854	0.000683925	292280	264080	271340	0.00234705	0.0030534	0.00382784	3	0.0030761	0.000604741
P161_RS0101360	P161_RS0101360	265	TolC family protein			4	4	4	1	1	3	1	1	1	0	0	0	8.4	53.307	4833800	235800	0	3101400	0	1496600	0	0	0	0	23	145100	10252	0	134840	8.68866e-05	0	0.00189418	2	0.000990533	0.000873166	0	65071	0	0	0.000752376	0	1	0	0
P161_RS0101365	P161_RS0101365	266	ABC transporter ATP-binding protein			9	9	9	5	4	3	2	4	3	5	2	5	46.5	25.297	56692000	5699300	13008000	4326500	12143000	2901800	1946600	6695600	3751400	6219300	12	3593900	398910	981800	278370	0.0033808	0.0124774	0.00391043	3	0.00658956	0.00416897	1011900	173640	145110	0.00812572	0.00200769	0.00204709	3	0.00406017	0.00287482
P161_RS0101380	P161_RS0101380	269	ABC transporter permease			3	3	3	1	0	0	1	0	0	0	1	1	3.6	92.639	887450	222360	0	0	273390	0	0	0	391710	0	31	21455	7172.9	0	0	6.0791e-05	0	0	1	0	0	8818.9	0	0	7.08172e-05	0	0	1	0	0
P161_RS0101385	P161_RS0101385	270	ABC transporter ATP-binding protein			9	9	9	1	1	1	1	3	3	5	3	3	36.9	25.371	9797200	0	452600	199060	467350	975450	886290	4354700	1262300	1199400	8	1038500	0	56575	24883	0	0.000718997	0.000349547	2	0.000534272	0.000293567	58419	121930	81640	0.000469114	0.0014098	0.00115171	3	0.00101021	0.000396855
P161_RS0101395	P161_RS0101395	272	sigma-54-dependent Fis family transcriptional regulator	RR|NtrC		23	23	23	10	10	11	17	12	11	13	8	14	56.9	50.134	393330000	24947000	10180000	10141000	70830000	24368000	37984000	88079000	38890000	87911000	27	9448400	555170	339720	318060	0.00470512	0.00431741	0.00446798	3	0.00449684	0.000159589	2053100	664000	1091400	0.0164867	0.00767743	0.0153966	3	0.0131869	0.00392113
P161_RS0101400	P161_RS0101400	273	HAMP domain-containing histidine kinase	HK|Classic		15	15	15	4	5	3	4	10	6	5	6	3	38.8	51.708	53789000	1990600	1131000	505500	9979700	4506500	1419400	8026100	13619000	12611000	25	1398200	79624	34624	20220	0.000674821	0.000440028	0.000284043	3	0.000466297	0.000160612	366980	159370	51639	0.00294691	0.0018427	0.00072848	3	0.00183936	0.000905672
P161_RS0101405	P161_RS0101405	274	hypothetical protein			5	5	5	1	1	0	3	2	2	2	3	3	13.7	31.809	83030000	15803000	6178400	0	25495000	10940000	1381900	8984300	2384400	11864000	13	4928400	1215600	475260	0	0.0103023	0.00603996	0	2	0.00817114	0.00422672	1805700	820640	23585	0.0145001	0.00948856	0.000332718	3	0.00810711	0.0058657
P161_RS0101410	P161_RS0101410	275	glycosyltransferase	CAZyme, single-domain, contains GT2 domain		4	4	4	0	0	1	1	1	0	2	1	3	15.4	27.969	5323900	0	0	108290	1416200	336810	0	1796400	1209200	457040	11	229830	0	0	9844.8	0	0	0.000138296	1	0	0	128740	30619	0	0.0010338	0.000354029	0	2	0.000693916	0.000428975
P161_RS0101415	P161_RS0101415	276	glycosyltransferase	CAZyme, single-domain, contains GT4 domain		12	12	12	4	3	4	9	4	9	2	7	4	30.4	42.814	40395000	2740900	1435700	1480600	5675600	1966800	2564000	7080500	15409000	2041700	23	1375200	119170	62423	51220	0.00100998	0.000793318	0.000719519	3	0.000840938	0.000123267	173000	85513	81202	0.00138922	0.000988735	0.00114553	3	0.00117449	0.000164774
P161_RS0101420	P161_RS0101420	277	ATP-binding cassette domain-containing protein			21	21	21	12	10	10	13	14	12	11	12	14	80.3	25.781	576260000	43555000	41885000	30781000	59958000	34693000	43078000	104810000	112370000	105130000	15	32783000	2621600	2463600	1731500	0.0222183	0.0313093	0.0243234	3	0.0259503	0.00388557	3892800	1985300	2793600	0.0312598	0.0229548	0.0394098	3	0.0312081	0.00671782
P161_RS0101425	P161_RS0101425	278	tetratricopeptide repeat protein			58	58	58	28	32	27	48	41	36	21	30	25	52.3	114.2	794360000	64263000	33495000	31398000	98229000	81175000	111210000	94187000	137090000	143320000	61	11106000	964340	479440	432810	0.00817287	0.00609308	0.00607995	3	0.00678197	0.000983533	1301100	1207900	1558400	0.010448	0.0139662	0.0219846	3	0.0154663	0.00482776
P161_RS0101430	P161_RS0101430	279	hypothetical protein			15	15	15	7	7	3	11	10	11	5	8	9	28.7	67.011	342540000	22758000	10733000	15904000	46336000	33802000	22631000	51016000	59085000	80272000	22	12560000	894090	442440	616440	0.0075775	0.00562286	0.00865951	3	0.00728662	0.00125665	1785700	1503700	928430	0.0143395	0.0173864	0.0130975	3	0.0149411	0.00180186
P161_RS0101435	P161_RS0101435	280	hypothetical protein			10	10	10	5	6	5	4	5	5	6	5	5	37.4	28.342	100250000	4329800	5121000	1642600	5419600	9641100	4468000	23216000	26302000	20108000	14	7084300	309270	341090	117330	0.00262109	0.00433483	0.00164821	3	0.00286804	0.00111062	387110	637080	319140	0.00310855	0.00736617	0.00450216	3	0.0049923	0.00177238
P161_RS0101440	P161_RS0101440	281	GTPase ObgE			15	15	15	11	10	12	12	10	10	11	11	9	52.6	35.878	691290000	57960000	23790000	18599000	109310000	27520000	66393000	163630000	107640000	116450000	22	18283000	1686700	919770	754920	0.0142949	0.0116891	0.0106048	3	0.0121963	0.00154858	3245900	1004800	2202400	0.0260651	0.0116179	0.0310696	3	0.0229175	0.00824714
P161_RS19275	P161_RS19275	282	adenylate kinase			23	23	23	17	14	13	19	12	15	18	17	18	66.9	41.999	911090000	80497000	36244000	24800000	115430000	44346000	73058000	182110000	201550000	153060000	24	29541000	2628400	1322000	940220	0.0222759	0.016801	0.0132078	3	0.0174282	0.00372851	3876800	1630100	2460200	0.0311313	0.0188479	0.0347065	3	0.0282285	0.00679183
P161_RS0101455	P161_RS0101455	283	protein translocase subunit SecDF			55	55	55	47	50	46	50	46	44	45	50	45	52.4	108.65	20279000000	1.8662e+09	1178600000	1.0429e+09	2.1237e+09	1156700000	1.6402e+09	4.164e+09	3.3486e+09	3.7582e+09	42	328790000	29332000	18150000	15873000	0.248591	0.230664	0.222978	3	0.234078	0.0107318	32484000	19884000	25335000	0.260852	0.229907	0.357405	3	0.282721	0.0542997
P161_RS0101465	P161_RS0101465	285	formate--tetrahydrofolate ligase			27	27	27	14	17	14	19	12	16	16	19	13	54.1	60.488	460730000	28001000	14741000	30049000	37220000	23189000	13981000	101800000	103350000	108400000	28	11670000	689050	471800	943050	0.00583976	0.00599598	0.0132476	3	0.00836112	0.00345585	869600	753710	438980	0.00698303	0.00871469	0.00619277	3	0.00729683	0.00105321
P161_RS0101470	P161_RS0101470	286	DNA helicase RecQ			19	19	19	3	2	1	12	7	4	6	12	9	26.3	79.905	49112000	917560	290830	489060	5832600	2596900	1497900	12805000	15560000	9121800	43	863590	15352	6763.5	11373	0.00013011	8.59556e-05	0.000159763	3	0.000125276	3.03252e-05	97384	60394	34835	0.000782009	0.000698299	0.000491423	3	0.000657244	0.000122131
P161_RS0101475	P161_RS0101475	287	malate dehydrogenase			22	22	22	18	18	18	19	20	18	20	21	20	87.7	32.113	10266000000	602960000	634690000	643080000	958540000	365220000	807030000	2449100000	2.0987e+09	1.7062e+09	15	422110000	28948000	28615000	28834000	0.245337	0.363661	0.405049	3	0.338015	0.0676768	35996000	19626000	28222000	0.289054	0.226923	0.398133	3	0.304703	0.0707664
P161_RS0101480	P161_RS0101480	288	hypothetical protein			17	17	17	10	10	10	14	13	12	15	16	15	39.8	35.459	5537200000	135820000	175840000	179540000	847660000	257360000	282820000	1438900000	1235700000	983570000	14	271170000	7743600	9806900	10314000	0.0656277	0.124633	0.144887	3	0.111716	0.033622	33707000	13832000	15574000	0.270673	0.159931	0.219705	3	0.21677	0.0452577
P161_RS0101485	P161_RS0101485	289	DNA topoisomerase (ATP-hydrolyzing) subunit B			49	49	49	39	34	35	40	31	37	38	40	41	70.1	71.726	5.99e+09	523830000	310300000	548800000	496200000	311970000	319070000	1.7217e+09	991950000	766210000	31	111530000	11547000	6297300	9436700	0.0978619	0.0800308	0.132563	3	0.103485	0.0218117	7414400	5611000	6521600	0.0595388	0.0648766	0.0920013	3	0.0721389	0.0142129
P161_RS0101510	P161_RS0101510	294	bifunctional amidotransferase subunit GatB/aspartate--tRNA ligase AspS			92	92	92	61	65	58	68	60	68	53	70	63	70.6	126.47	3.9658e+09	404900000	260030000	200640000	440300000	285060000	346500000	484620000	626140000	917600000	60	37049000	4002900	2987200	1999600	0.0339249	0.0379636	0.0280896	3	0.033326	0.00405321	4861000	3166100	2922400	0.0390346	0.0366077	0.0412268	3	0.0389564	0.00188656
P161_RS0101515	P161_RS0101515	295	Asp-tRNA(Asn)/Glu-tRNA(Gln) amidotransferase subunit GatA			41	41	41	27	31	25	30	23	27	27	21	23	81.1	50.776	3.3298e+09	311580000	173790000	107730000	426220000	165710000	338410000	616950000	459890000	729510000	29	55030000	6392600	3228800	2287700	0.0541779	0.041034	0.0321367	3	0.0424495	0.00905376	6974600	3687100	6602700	0.0560071	0.0426317	0.0931454	3	0.0639281	0.0213692
P161_RS0101520	P161_RS0101520	296	hypothetical protein			2	2	2	0	1	1	1	2	1	0	1	1	27.7	9.2504	13900000	0	1417400	961540	1564300	1966700	811290	0	3756500	3422200	7	1975300	0	202490	137360	0	0.00257339	0.00192958	2	0.00225149	0.00109342	223470	270580	115900	0.0017945	0.00312855	0.00163502	3	0.00218602	0.00066964
P161_RS0101525	P161_RS0101525	297	anthranilate synthase component I family protein			30	30	30	22	18	18	16	15	16	17	19	20	63.5	52.364	1.5958e+09	206260000	102060000	133310000	151770000	57828000	114740000	244050000	164670000	421110000	27	39792000	5776700	2889600	3872500	0.0489581	0.0367232	0.0543994	3	0.0466935	0.0073918	4291000	1705600	2878800	0.0344574	0.0197208	0.0406117	3	0.0315967	0.00876529
P161_RS0101530	P161_RS0101530	298	aminodeoxychorismate/anthranilate synthase component II			7	7	7	3	7	5	4	2	5	4	4	4	66	21.754	243220000	6788700	32452000	17660000	10802000	4670100	14734000	22162000	59327000	74627000	9	5264100	468090	427790	97759	0.00396711	0.00543667	0.00137328	3	0.00359235	0.0016799	389510	362760	43337	0.00312783	0.00419437	0.000611363	3	0.00264452	0.00150215
P161_RS0101535	P161_RS0101535	299	anthranilate phosphoribosyltransferase			15	15	15	11	11	10	11	6	9	10	9	9	54.1	36.166	313170000	27509000	25519000	46413000	34683000	11073000	9481100	62857000	68478000	27154000	14	13674000	1242700	1162300	1778200	0.010532	0.0147714	0.0249795	3	0.0167609	0.00606361	1466700	615200	588970	0.0117778	0.00711318	0.0083087	3	0.00906657	0.0019783
P161_RS0101545	P161_RS0101545	300	indole-3-glycerol phosphate synthase TrpC			15	15	15	13	11	9	10	9	7	11	8	10	51.9	28.828	513060000	54365000	49432000	36212000	59119000	19330000	34869000	79422000	111670000	68640000	12	19486000	2672700	2269300	1821100	0.0226514	0.02884	0.0255821	3	0.0256911	0.00252765	2683700	1215700	1882600	0.0215505	0.0140564	0.0265582	3	0.0207217	0.00513736
P161_RS0101550	P161_RS0101550	301	DNA-deoxyinosine glycosylase			2	2	2	1	0	1	1	0	0	0	0	1	13.1	21.261	2709900	1109800	0	241110	511370	0	0	0	0	847560	9	301100	123320	0	26790	0.00104515	0	0.000376335	2	0.000710742	0.000432213	56819	0	0	0.000456266	0	0	1	0	0
P161_RS0101555	P161_RS0101555	302	phosphoribosylanthranilate isomerase			10	10	10	2	4	2	2	2	1	7	5	4	34.8	26.161	37188000	2028900	5275300	1057800	734110	951320	170190	8345500	8965400	9659400	13	2005700	112670	152570	81366	0.000954889	0.00193897	0.001143	3	0.00134562	0.000426534	56470	73179	13091	0.000453463	0.000846124	0.000184677	3	0.000494755	0.000271609
P161_RS0101560	P161_RS0101560	303	tryptophan synthase subunit beta			12	12	12	6	6	7	6	7	7	7	7	6	34.5	42.971	327660000	29724000	17509000	10204000	41234000	19734000	34899000	74073000	41228000	59060000	15	13011000	1477700	898550	549940	0.0125236	0.0114194	0.00772534	3	0.0105561	0.00205181	2193000	709830	1416900	0.0176101	0.00820733	0.0199885	3	0.0152686	0.00508663
P161_RS0101565	P161_RS0101565	304	tryptophan synthase subunit alpha			14	14	14	13	12	13	7	9	4	11	8	11	52.5	28.497	181500000	17789000	22998000	20655000	7560800	8434100	1875300	34897000	34053000	33232000	12	11091000	1411900	1417100	1233500	0.011966	0.0180096	0.0173277	3	0.0157678	0.00270263	608060	512750	48670	0.00488282	0.00592862	0.000686596	3	0.00383268	0.00226521
P161_RS17880	P161_RS17880	305	peptidylprolyl isomerase			6	6	6	2	2	2	3	4	3	6	3	3	45.9	16.048	39616000	2369600	2476000	1949300	4146600	1077200	2457000	8871800	8081900	8186600	7	4683600	264840	314010	278470	0.00224454	0.00399067	0.00391184	3	0.00338235	0.000805195	495540	120890	275050	0.00397926	0.00139778	0.00388018	3	0.00308574	0.00119426
P161_RS0101575	P161_RS0101575	306	amidohydrolase			34	34	34	20	17	17	26	25	24	20	24	21	53.6	61.454	1.8486e+09	142380000	55158000	107540000	102930000	162070000	50771000	352730000	489170000	385890000	29	29385000	2281500	863480	1640000	0.0193359	0.0109737	0.0230381	3	0.0177826	0.00504623	2750600	3084000	1227500	0.0220878	0.0356584	0.0173166	3	0.0250209	0.00776996
P161_RS0101585	P161_RS0101585	308	thymidylate synthase			14	14	14	9	8	8	9	6	6	9	13	9	52.6	31.435	416500000	27158000	33061000	13117000	48728000	12163000	19045000	90319000	88179000	84734000	14	21669000	1588900	1838600	831020	0.0134661	0.0233663	0.0116738	3	0.0161687	0.00514177	2127600	848930	1272300	0.017085	0.00981566	0.0179486	3	0.0149497	0.00364741
P161_RS0101590	P161_RS0101590	309	Na+ dependent nucleoside transporter			8	8	8	4	4	3	3	5	5	6	5	3	23.9	49.542	65435000	4581900	5359900	3455400	6442600	5458800	2434200	17103000	18070000	2529500	14	2839400	220590	235960	190580	0.00186952	0.00299875	0.00267719	3	0.00251516	0.000475033	209790	200250	130100	0.00168465	0.00231537	0.00183534	3	0.00194512	0.000268937
P161_RS0101595	P161_RS0101595	310	hypothetical protein			13	13	13	7	7	6	4	7	8	9	11	12	73.9	22.789	313180000	8773300	12397000	9991800	18860000	16521000	15147000	84318000	86439000	60732000	12	23151000	686240	962690	832650	0.00581595	0.0122346	0.0116967	3	0.00991576	0.00290731	1518200	1307800	1213100	0.0121914	0.0151213	0.0171134	3	0.0148087	0.00202153
P161_RS0101600	P161_RS0101600	311	electron transfer flavoprotein subunit alpha/FixB family protein			20	20	20	12	13	15	16	16	16	18	17	15	63.5	33.239	3.3777e+09	248240000	233330000	241810000	428600000	110470000	208070000	836130000	538050000	533030000	14	152590000	12128000	11813000	12241000	0.102786	0.150128	0.171957	3	0.141624	0.0288721	21995000	5079200	10038000	0.176623	0.0587277	0.141608	3	0.125653	0.0494352
P161_RS0101605	P161_RS0101605	312	electron transfer flavoprotein subunit beta/FixA family protein			19	19	19	17	17	18	15	16	10	16	18	19	66.1	26.636	1339800000	148790000	140540000	124650000	187060000	59179000	42224000	215550000	235830000	185980000	11	48567000	5689200	4803800	4211900	0.0482165	0.0610503	0.0591671	3	0.0561446	0.00565851	4775900	2668300	2790400	0.0383512	0.0308519	0.0393647	3	0.0361893	0.00379668
P161_RS0101610	P161_RS0101610	313	pyruvate dehydrogenase complex E1 component subunit beta			30	30	30	24	21	21	23	23	21	26	25	24	81.7	36.401	13720000000	893330000	735000000	928170000	1361100000	433680000	587630000	3.5128e+09	3.5855e+09	1.6832e+09	18	405230000	29145000	25405000	31586000	0.247007	0.322866	0.443708	3	0.33786	0.0809999	42437000	16607000	18599000	0.340776	0.192017	0.262379	3	0.265057	0.0607602
P161_RS0101615	P161_RS0101615	314	inorganic diphosphatase			17	17	17	9	8	8	8	5	3	11	10	12	59.4	20.367	581610000	47092000	16384000	24091000	37409000	7355400	2007900	155210000	178630000	113420000	7	8003600	1202600	347270	2341500	0.0101921	0.00441337	0.0328925	3	0.0158327	0.0122916	516400	131070	102650	0.00414677	0.00151548	0.0014481	3	0.00237012	0.00125659
P161_RS17885	P161_RS17885	315	sodium-translocating pyrophosphatase			19	19	19	13	13	13	15	15	15	15	15	13	24.4	79.284	3.155e+09	211970000	91615000	157690000	272420000	256410000	175040000	768780000	572620000	648470000	19	132960000	9556000	4243000	6726400	0.080988	0.0539232	0.0944898	3	0.076467	0.016867	10692000	11666000	7520900	0.0858585	0.134887	0.106099	3	0.108948	0.0201169
P161_RS0101625	P161_RS0101625	316	hypothetical protein			6	6	6	1	0	0	1	3	2	2	3	3	33.1	28.959	38719000	438550	0	0	4133400	1982000	3253900	9916300	7390200	11605000	13	2660100	33735	0	0	0.000285907	0	0	1	0	0	317950	152460	250300	0.00255319	0.0017628	0.00353103	3	0.00261567	0.000723225
P161_RS0101630	P161_RS0101630	317	DUF4240 domain-containing protein			7	7	7	3	0	1	6	2	4	5	3	3	26.9	35.31	32895000	1789600	0	608770	6573200	1568500	4447300	7735500	5259200	4912500	16	1432200	111850	0	38048	0.000947939	0	0.000534483	2	0.000741211	0.000388044	218290	83297	198910	0.0017529	0.000963112	0.00280606	3	0.00184069	0.000754936
P161_RS0101635	P161_RS0101635	318	DUF2183 domain-containing protein			6	6	6	2	2	2	4	3	4	6	4	3	17.4	38.617	37920000	1210700	811110	1184600	2316800	722080	1125100	14019000	11901000	4629200	16	933410	57076	22282	74038	0.000483724	0.000283176	0.00104006	3	0.000602319	0.000320173	107210	28152	56199	0.000860913	0.000325504	0.000792809	3	0.000659742	0.000237972
P161_RS0101645	P161_RS0101645	320	PA2169 family four-helix-bundle protein			31	31	31	24	19	20	20	18	18	23	20	21	88.6	17.085	1.9161e+09	139480000	97028000	54506000	163920000	121930000	49562000	462250000	440310000	387160000	10	47426000	6462400	1810300	1593800	0.0547694	0.0230066	0.0223891	3	0.0333884	0.0151208	2659000	7271900	1907800	0.0213522	0.0840806	0.0269137	3	0.0441155	0.0283506
P161_RS0101650	P161_RS0101650	321	helix-turn-helix transcriptional regulator	TR|AraC		31	31	31	19	20	16	22	19	21	24	21	18	66.6	39.917	783640000	41330000	41252000	28091000	58529000	53713000	28506000	202110000	220700000	109400000	23	26423000	1327600	1519200	1017000	0.0112515	0.0193071	0.0142864	3	0.0149484	0.00332182	2042500	2081500	1062900	0.0164016	0.0240671	0.0149945	3	0.0184877	0.00398681
P161_RS0101655	P161_RS0101655	322	hypothetical protein			4	4	4	0	1	2	3	2	2	2	1	1	56.1	7.4878	21829000	0	219250	467050	1624300	2960200	789130	7388200	4265500	4115400	5	1244000	0	43850	93410	0	0.000557278	0.00131219	2	0.000934733	0.00053772	141700	304340	157830	0.00113787	0.0035189	0.00222653	3	0.00229444	0.000973234
P161_RS0101660	P161_RS0101660	323	hypothetical protein			8	8	8	5	4	3	7	6	4	7	4	5	37.1	12.671	303960000	21863000	11326000	7510200	39466000	69551000	11581000	57889000	45846000	38927000	4	44884000	4531300	2034600	1621200	0.0384032	0.0258572	0.022774	3	0.0290115	0.00675919	6532000	4116000	2094300	0.052453	0.0475908	0.0295447	3	0.0431961	0.00985504
P161_RS0101665	P161_RS0101665	324	YtxH domain-containing protein			20	20	20	17	14	16	17	19	15	18	18	20	66.9	13.143	4.1161e+09	160140000	68735000	71611000	466790000	299400000	72998000	866190000	1091400000	1.0188e+09	6	186150000	11131000	5649600	4881100	0.0943362	0.0717993	0.0685678	3	0.0782345	0.0114619	19702000	16410000	3697000	0.15821	0.189739	0.0521542	3	0.133368	0.0588515
P161_RS0101670	P161_RS0101670	325	biotin-dependent carboxyltransferase family protein			2	2	2	0	0	0	0	0	0	2	0	0	8.2	30.939	543950	0	0	0	0	0	0	543950	0	0	13	41842	0	0	0	0	0	0	0	0	0	0	0	0	0	0	0	0	0	0
P161_RS0101675	P161_RS0101675	326	5-oxoprolinase subunit PxpB			2	2	2	0	0	0	0	0	0	2	0	0	12.3	28.154	1334800	0	0	0	0	0	0	1334800	0	0	13	102670	0	0	0	0	0	0	0	0	0	0	0	0	0	0	0	0	0	0
P161_RS0101680	P161_RS0101680	327	5-oxoprolinase subunit PxpA			12	12	12	6	4	3	4	5	3	8	7	8	44.5	27.848	61354000	1874700	1671900	1619800	4597800	2849000	1822500	25050000	12685000	9183100	14	3811300	133910	119420	115700	0.0011349	0.00151768	0.00162531	3	0.00142596	0.00021045	231570	196650	130180	0.00185954	0.00227374	0.00183647	3	0.00198992	0.000200915
P161_RS0101695	P161_RS0101695	330	phosphoenolpyruvate carboxykinase (ATP)			47	47	47	29	26	28	35	30	26	26	27	25	86.6	59.767	3.0768e+09	256840000	89440000	279130000	252040000	201220000	90648000	513210000	500200000	894100000	30	49526000	5040900	1970900	4689000	0.0427221	0.0250477	0.0658692	3	0.0445463	0.0167152	3992100	3463500	1379900	0.0320572	0.0400463	0.0194665	3	0.0305233	0.00847141
P161_RS0101705	P161_RS0101705	332	saccharopine dehydrogenase			27	27	27	15	17	14	14	20	21	14	17	16	55.2	51.824	667730000	61767000	32340000	20789000	105430000	62825000	101680000	117530000	83695000	81674000	26	20173000	2014500	1093000	715930	0.0170731	0.0138907	0.0100571	3	0.0136736	0.00286837	3626900	1851900	3185300	0.0291246	0.0214124	0.0449356	3	0.0318242	0.00979118
P161_RS0101715	P161_RS0101715	334	hypothetical protein			4	4	4	4	2	0	2	3	3	4	2	3	28.3	16.887	45239000	3495200	1284200	0	0	3012100	1557700	17210000	9150200	9529500	7	5906700	499310	183460	0	0.0042317	0.00233155	0	2	0.00328162	0.00173057	0	430300	222530	0	0.0049753	0.00313927	2	0.00405728	0.00205425
P161_RS0101720	P161_RS0101720	335	glycosidase	CAZyme, multi-domain, contains two GH13_18 domains		9	9	9	1	1	1	2	1	4	2	4	2	16.2	66.842	63723000	3882900	2383000	2086500	5892000	3414000	4408800	15181000	11392000	15082000	36	1613500	107860	66193	57959	0.000914123	0.00084123	0.000814185	3	0.000856513	4.22065e-05	163670	94833	122470	0.0013143	0.0010965	0.00172771	3	0.0013795	0.000261782
P161_RS0101725	P161_RS0101725	336	carbohydrate kinase			7	7	7	3	3	2	6	5	5	5	3	2	26	34.645	21309000	1800800	2263300	606010	3898300	1616800	2275300	2648100	4692200	1508500	20	922110	52564	113160	30300	0.000445485	0.00143812	0.000425643	3	0.00076975	0.00047268	194910	62844	113760	0.00156516	0.000726627	0.00160483	3	0.00129887	0.000404963
P161_RS0101740	P161_RS0101740	339	TonB-dependent receptor	SusC-like		16	16	16	9	13	13	7	8	5	3	6	4	20.7	93.384	78338000	8985500	8453100	6325300	6896400	14186000	3582200	6420700	7601500	15887000	37	1460400	161280	167980	128540	0.00136686	0.00213481	0.00180568	3	0.00176912	0.000314579	137400	366670	96817	0.00110334	0.00423958	0.00136581	3	0.00223625	0.00142062
P161_RS0101745	P161_RS0101745	340	LacI family transcriptional regulator	OCS|LacI		10	10	10	2	1	1	5	5	4	4	8	2	29.7	38.62	59206000	1620400	1450200	3157400	6638400	4164700	2008300	20810000	14726000	4631600	15	2147400	98693	96683	210500	0.000836432	0.00122872	0.00295702	3	0.00167406	0.00092122	347380	175900	78069	0.00278952	0.00203382	0.00110133	3	0.00197489	0.000690457
P161_RS17890	P161_RS17890	346	RES family NAD+ phosphorylase			7	7	7	0	0	1	2	2	3	4	4	1	27.3	40.399	18596000	0	0	112150	4955700	389590	1577500	4803800	5531500	1225600	18	657300	0	0	6230.4	0	0	8.75222e-05	1	0	0	275320	21644	87641	0.00221086	0.000250256	0.00123637	3	0.0012325	0.000800419
P161_RS0101780	P161_RS0101780	347	sce7725 family protein			19	19	19	10	14	12	13	12	11	13	14	10	62.2	35.163	344040000	18317000	27408000	17423000	43500000	14608000	25156000	84514000	59291000	53827000	18	14708000	695440	1271900	806440	0.00589392	0.0161643	0.0113286	3	0.0111289	0.00419522	1939400	707230	1212400	0.0155737	0.00817727	0.0171035	3	0.0136182	0.00389766
P161_RS0101810	P161_RS0101810	353	cadmium-translocating P-type ATPase			8	7	7	5	4	6	4	3	1	3	4	2	16.1	71.331	23788000	3226600	1916100	3369700	2045300	2111800	0	4981700	3453500	2683000	27	320330	63871	23765	50154	0.000541313	0.000302023	0.000704544	3	0.00051596	0.000165303	34816	29276	0	0.000279578	0.000338501	0	2	0.000309039	0.000147655
P161_RS0101820	P161_RS0101820	355	STAS/SEC14 domain-containing protein			5	5	5	4	3	2	4	1	1	1	1	0	27.7	14.19	15727000	2719700	498310	432810	2564500	0	208460	2987500	6316000	0	8	157830	63307	62289	23560	0.000536533	0.000791615	0.000330962	3	0.000553036	0.000188423	70964	0	26057	0.000569852	0	0.000367591	2	0.000468721	0.000235882
P161_RS0101840	P161_RS0101840	358	heavy metal translocating P-type ATPase			24	24	24	13	14	12	11	16	12	8	13	9	29.2	91.723	426150000	69713000	43262000	32887000	49992000	31887000	29684000	56479000	43199000	69043000	39	8172900	1519300	978060	735950	0.0128762	0.0124299	0.0103383	3	0.0118815	0.00110628	1002900	618410	597280	0.00805345	0.0071503	0.00842593	3	0.00787656	0.000535585
P161_RS0101860	P161_RS0101860	362	ATP-binding protein			3	3	3	3	0	0	0	1	0	0	1	1	10.3	28.749	1271900	389210	0	0	0	0	0	0	368900	513840	12	106000	32434	0	0	0.000274881	0	0	1	0	0	0	0	0	0	0	0	0	0	0
P161_RS0101865	P161_RS0101865	363	SHOCT domain-containing protein			3	3	3	0	1	2	2	0	0	1	0	1	27.4	9.1477	3134000	0	509480	354470	968690	0	0	1301400	0	0	1	1876300	0	509480	184660	0	0.00647485	0.00259403	2	0.00453444	0.00266069	390250	0	0	0.00313377	0	0	1	0	0
P161_RS0101870	P161_RS0101870	364	STAS/SEC14 domain-containing protein			3	3	3	1	0	1	1	1	1	2	1	1	32.5	13.957	6606500	0	0	353380	992000	284010	265810	2428500	1383100	899720	4	1305900	0	0	88345	0	0	0.00124104	1	0	0	248000	71001	66452	0.00199148	0.000820941	0.00093745	3	0.00124996	0.000526489
P161_RS0101880	P161_RS0101880	366	P-II family nitrogen regulator			2	2	2	1	0	1	0	0	0	0	0	0	34.8	12.173	528960	528960	0	0	0	0	0	0	0	0	4	132240	132240	0	0	0.00112075	0	0	1	0	0	0	0	0	0	0	0	0	0	0
P161_RS0101885	P161_RS0101885	367	efflux RND transporter periplasmic adaptor subunit			15	15	15	10	7	8	7	3	6	10	6	6	48.3	46.22	186870000	11492000	4825200	12143000	16718000	4740900	4213500	44324000	29973000	58437000	22	3854000	327200	130390	278980	0.00277305	0.00165709	0.003919	3	0.00278305	0.000923448	244980	73709	131060	0.00196723	0.000852252	0.00184889	3	0.00155612	0.000500051
P161_RS0101890	P161_RS0101890	368	CusA/CzcA family heavy metal efflux RND transporter			31	30	28	14	14	12	13	10	12	9	11	13	22.8	162.83	171280000	17454000	10641000	7142000	22694000	9472800	29428000	28276000	22498000	23673000	69	1847200	179100	124950	84796	0.00151789	0.00158796	0.00119118	3	0.00143234	0.000172909	195980	137290	362630	0.00157375	0.0015874	0.00511568	3	0.00275894	0.00166648
P161_RS0101900	P161_RS0101900	370	four-helix bundle copper-binding protein			8	8	8	5	5	4	7	4	4	5	2	0	72.6	11.807	97605000	7466100	4124300	3398200	12517000	10378000	4693400	33194000	21834000	0	7	4119200	259970	190430	176850	0.00220327	0.00242013	0.00248432	3	0.00236924	0.000120248	530470	738750	266690	0.00425976	0.00854172	0.00376224	3	0.00552124	0.00214544
P161_RS0101905	P161_RS0101905	371	helix-turn-helix transcriptional regulator	TR|AraC		4	4	4	0	1	0	1	3	3	2	2	3	21.3	21.578	20646000	0	1152900	0	667050	2549900	3039000	6711000	3170500	3355900	10	1949300	0	115290	0	0	0.00146519	0	1	0	0	66705	254990	303900	0.000535652	0.00294829	0.00428717	3	0.00259037	0.00155232
P161_RS0101915	P161_RS0101915	372	efflux RND transporter periplasmic adaptor subunit			27	27	27	7	7	10	22	18	20	19	16	20	43.3	65.631	572300000	17368000	6397600	12842000	55005000	53266000	46160000	194260000	95289000	91720000	28	12723000	600600	220220	404380	0.00509014	0.00279872	0.00568057	3	0.00452314	0.00124295	1250900	1107100	917280	0.0100449	0.0128007	0.0129402	3	0.0119286	0.00133319
P161_RS0101920	P161_RS0101920	373	DUF305 domain-containing protein			9	9	9	4	5	2	8	6	7	8	7	5	36	18.97	248750000	11158000	7683300	479750	38742000	23379000	14321000	66562000	67530000	18891000	9	23474000	1164400	802900	27285	0.0098684	0.0102038	0.000383289	3	0.00681851	0.00455245	3480700	2346200	1312300	0.0279506	0.0271277	0.0185128	3	0.0245304	0.00426827
P161_RS0101925	P161_RS0101925	374	membrane protein			3	3	3	0	1	0	1	0	1	2	2	2	14.8	27.913	32871000	0	51270	0	2108700	0	1580000	1624900	5084000	22423000	10	75120	0	5127	0	0	6.51577e-05	0	1	0	0	210870	0	158000	0.00169332	0	0.00222893	2	0.00196113	0.000949992
P161_RS0101930	P161_RS0101930	375	DUF2911 domain-containing protein			7	7	7	2	2	1	3	3	3	7	4	2	36.9	22.264	51652000	460310	587960	161600	4423700	2507400	1651700	25038000	9075600	7746100	10	4329700	46031	58796	16160	0.000390117	0.000747223	0.000227009	3	0.000454783	0.000217243	442370	250740	165170	0.0035523	0.00289915	0.00233008	3	0.00292718	0.000499362
P161_RS0101935	P161_RS0101935	376	heavy metal translocating P-type ATPase			23	23	23	7	5	3	13	13	13	15	11	10	22.8	100.01	286750000	8750100	2040000	2307100	31663000	18142000	37519000	69828000	75981000	40521000	34	5631100	236530	49784	49186	0.00200461	0.000632692	0.000690946	3	0.00110942	0.000633446	494540	318860	771610	0.00397123	0.00368678	0.0108852	3	0.00618108	0.00332836
P161_RS0101950	P161_RS0101950	379	universal stress protein			17	17	17	5	6	6	11	10	8	11	7	8	52	31.637	180640000	5301600	5989900	4607200	30724000	11361000	11645000	51587000	24034000	35388000	19	7480300	220510	247590	180710	0.00186884	0.00314656	0.00253854	3	0.00251798	0.000521828	1290500	544970	504290	0.0103629	0.00630116	0.00711411	3	0.00792606	0.00175479
P161_RS0101970	P161_RS0101970	382	heme-binding domain-containing protein			2	2	2	0	0	1	0	1	0	0	0	0	27.3	17.402	3062100	0	0	876780	0	2185300	0	0	0	0	7	437450	0	0	125250	0	0	0.00175946	1	0	0	0	312190	0	0	0.00360966	0	1	0	0
P161_RS0101975	P161_RS0101975	383	DUF3347 domain-containing protein			11	11	11	6	3	4	8	10	8	5	5	4	50	20.628	208540000	7908400	4215200	2282000	29010000	23470000	17406000	69059000	36135000	19056000	13	11129000	474460	324250	175540	0.00402109	0.00412081	0.00246592	3	0.00353594	0.000757714	1911200	1242300	859860	0.0153472	0.014364	0.0121302	3	0.0139471	0.00134602
P161_RS0101980	P161_RS0101980	384	multicopper oxidase domain-containing protein	CAZyme, single-domain, contains AA1 domain		26	26	26	7	7	8	19	18	19	17	14	11	32.8	93.837	648920000	11619000	10540000	8418400	121310000	45502000	77766000	186240000	88546000	98983000	40	12599000	290480	243510	181550	0.00246184	0.00309471	0.00255034	3	0.0027023	0.000279817	2515300	1033800	1324000	0.0201983	0.0119532	0.0186779	3	0.0169431	0.00358258
P161_RS0101985	P161_RS0101985	385	helix-turn-helix transcriptional regulator	TR|AraC		7	7	7	0	1	0	4	6	5	4	4	2	35.6	22.333	61007000	0	351400	0	6576900	7102800	3618500	18515000	17806000	7035900	8	6968200	0	43924	0	0	0.000558219	0	1	0	0	656610	801640	428470	0.00527268	0.00926888	0.0060445	3	0.00686202	0.00173083
P161_RS0101990	P161_RS0101990	386	TolC family protein			26	26	26	3	3	2	11	15	17	14	13	11	64.2	46.791	308380000	3720900	913440	356970	66335000	23425000	67510000	70857000	38511000	36754000	24	5700200	93094	18421	14874	0.00078898	0.000234108	0.000208944	3	0.000410677	0.000267698	1233700	555300	1475200	0.00990681	0.0064206	0.0208109	3	0.0123794	0.00612947
P161_RS0101995	P161_RS0101995	387	efflux RND transporter permease subunit			38	38	38	10	19	15	27	25	28	30	29	29	40.3	138.12	751520000	1840500	13147000	4589500	140280000	54665000	63802000	196220000	84782000	192190000	45	10490000	35348	253780	96196	0.000299578	0.00322522	0.00135132	3	0.00162538	0.00121001	2198800	851920	932930	0.0176567	0.00985023	0.013161	3	0.013556	0.0031992
P161_RS0102005	P161_RS0102005	389	cadmium-translocating P-type ATPase			15	15	14	8	6	5	10	8	8	8	10	8	25.3	71.315	242470000	14940000	7868900	18526000	26290000	13802000	15126000	74538000	46579000	24800000	26	3757100	299940	195650	193860	0.00254202	0.00248647	0.00272327	3	0.00258392	0.000101113	235060	283370	187810	0.00188757	0.00327643	0.00264947	3	0.00260449	0.000567893
P161_RS0102020	P161_RS0102020	393	efflux RND transporter periplasmic adaptor subunit			22	22	22	13	12	12	16	12	12	14	12	16	69.8	44.555	1166100000	71005000	36916000	27310000	123820000	48744000	71624000	363980000	172720000	249930000	25	29991000	2008400	1235800	957070	0.0170214	0.0157055	0.0134445	3	0.0153905	0.00147712	3358100	1713200	2194000	0.0269661	0.0198087	0.0309511	3	0.0259086	0.00460993
P161_RS0102025	P161_RS0102025	394	CusA/CzcA family heavy metal efflux RND transporter			43	43	41	24	27	23	23	22	18	26	29	31	29.9	160.52	1.0673e+09	82191000	52266000	28649000	84952000	27328000	31734000	223890000	194140000	342140000	54	13426000	1084900	760030	451510	0.00919463	0.00965903	0.00634264	3	0.00839876	0.00146621	1055300	412770	340800	0.00847423	0.00477261	0.00480772	3	0.00601819	0.00173674
P161_RS0102045	P161_RS0102045	398	16S rRNA processing protein RimM			3	3	3	2	1	2	2	1	2	1	1	2	22.3	20.201	16549000	3548200	640820	808390	3217600	2579600	499060	0	2546600	2709000	8	1720600	354480	80102	101050	0.00300425	0.001018	0.00141951	3	0.00181392	0.000857504	296890	168750	62383	0.00238407	0.00195115	0.000880048	3	0.00173842	0.000632173
P161_RS0102050	P161_RS0102050	399	30S ribosomal protein S16			19	19	19	14	16	14	15	12	10	14	16	13	83.7	19.149	3.6132e+09	342410000	177370000	124510000	258840000	210360000	57777000	701090000	1260300000	480530000	7	97140000	12666000	7664500	4511100	0.107346	0.0974062	0.0633702	3	0.089374	0.0188299	9109600	5023600	1977000	0.0731515	0.0580848	0.0278899	3	0.0530421	0.0188189
P161_RS0102055	P161_RS0102055	400	PA2169 family four-helix-bundle protein			6	6	6	0	0	0	2	4	4	3	5	4	59.5	17.17	33891000	0	0	0	1871400	2230700	816750	8914400	9239500	10819000	8	1059500	0	0	0	0	0	0	0	0	0	233930	118930	36702	0.00187849	0.00137512	0.000517761	3	0.00125712	0.000561747
P161_RS0102060	P161_RS0102060	401	DNA polymerase III subunit alpha			72	72	72	4	13	14	38	33	15	56	35	41	45.9	163.23	293960000	8272800	5346000	2869200	39707000	14360000	5090100	93591000	37797000	86928000	85	2732700	97327	57783	24703	0.000824855	0.000734349	0.000347018	3	0.000635408	0.000207243	419340	140860	54522	0.00336737	0.00162868	0.000769151	3	0.00192173	0.00108077
P161_RS0102065	P161_RS0102065	402	FAD-binding protein			2	2	2	1	1	0	0	1	1	1	2	1	4.1	50.261	7632500	458240	544610	0	0	716140	312890	1456800	3541800	601950	23	331850	19923	23679	0	0.000168849	0.00030093	0	2	0.00023489	0.00012316	0	31137	13604	0	0.000360018	0.000191914	2	0.000275966	0.000147084
P161_RS0102070	P161_RS0102070	403	HAD family phosphatase			5	5	5	3	3	3	0	1	0	0	1	0	26.4	23.933	1997500	449610	844570	160860	0	180480	0	0	362000	0	13	79239	34586	52982	12374	0.00029312	0.000673335	0.000173825	3	0.000380093	0.000212996	0	13883	0	0	0.000160521	0	1	0	0
P161_RS0102075	P161_RS0102075	404	gliding motility-associated ABC transporter ATP-binding subunit GldA			16	16	16	7	7	5	9	6	7	8	12	14	53.9	34.346	404280000	23620000	19261000	12279000	34226000	7415900	15423000	60692000	73315000	158040000	16	16868000	911200	1168600	767420	0.0077225	0.0148514	0.0107804	3	0.0111181	0.00292015	1904600	463500	963960	0.0152942	0.00535917	0.0135987	3	0.0114174	0.00433937
P161_RS0102085	P161_RS0102085	406	outer membrane beta-barrel protein	putative SusC-like		33	33	33	25	25	20	21	19	17	18	22	23	45.7	104.81	1.0108e+09	135180000	51143000	50382000	92206000	43289000	54370000	134870000	171290000	278080000	41	15186000	1726100	688670	623510	0.0146289	0.00875213	0.00875883	3	0.0107133	0.00276874	1375200	787880	894930	0.0110431	0.00910978	0.0126249	3	0.0109259	0.00143744
P161_RS0102090	P161_RS0102090	407	GLPGLI family protein			21	21	21	15	13	11	13	14	14	18	17	15	48.4	31.566	480380000	31861000	36033000	23764000	49062000	25747000	30908000	134660000	75346000	72993000	14	25946000	2080100	2228600	1441200	0.017629	0.0283227	0.0202454	3	0.0220657	0.00455147	2575800	1518000	1628100	0.0206841	0.0175517	0.0229679	3	0.0204012	0.00222017
P161_RS0102095	P161_RS0102095	408	GLPGLI family protein			5	5	5	0	1	1	2	3	2	2	2	1	17.5	31.455	11517000	0	461310	0	1426900	644520	1374000	3557300	2021600	2031800	11	1013500	0	41938	0	0	0.000532979	0	1	0	0	129720	48966	124910	0.00104167	0.000566164	0.00176213	3	0.00112332	0.000491651
P161_RS0102105	P161_RS0102105	410	HAMP domain-containing histidine kinase	HK|Classic		5	5	5	1	1	0	1	1	0	2	2	1	6.9	61.75	28366000	7200800	197120	0	423630	1008300	0	16153000	2151000	1232700	32	381670	225020	6159.9	0	0.00190707	7.82846e-05	0	2	0.000992675	0.000881127	13238	31509	0	0.000106303	0.000364319	0	2	0.000235311	0.000152971
P161_RS0102110	P161_RS0102110	411	response regulator transcription factor	RR|OmpR		10	10	10	1	2	2	2	5	2	5	7	6	45.8	26.012	27471000	0	1335600	1008100	1311200	623950	665270	7754800	7890100	6882500	13	1695000	0	63972	47490	0	0.000813004	0.000667121	2	0.000740062	0.000353916	100860	17541	51175	0.000809922	0.000202816	0.000721935	3	0.000578224	0.000267873
P161_RS0102115	P161_RS0102115	412	deoxynucleoside kinase			18	18	18	12	15	11	14	10	10	13	15	12	76.5	23.866	850150000	39732000	75468000	45318000	72565000	42063000	41279000	154530000	244500000	134700000	11	27156000	1745400	2243800	1296700	0.0147924	0.0285159	0.0182155	3	0.0205079	0.00583236	1738700	1403000	590850	0.013962	0.016222	0.00833522	3	0.0128398	0.00331613
P161_RS0102125	P161_RS0102125	414	hypothetical protein			6	6	6	3	1	0	1	1	1	4	4	2	58	15.035	27397000	2642300	0	0	1389000	487930	1307300	7417700	9618600	4534500	5	5479500	528460	0	0	0.00447875	0	0	1	0	0	277800	97586	261470	0.00223078	0.00112833	0.0036886	3	0.00234924	0.00104858
P161_RS0102130	P161_RS0102130	415	16S rRNA (guanine(527)-N(7))-methyltransferase RsmG			17	17	17	11	11	11	10	11	10	14	13	13	77	23.69	442010000	26533000	38368000	14710000	24628000	17096000	23493000	127750000	71066000	98361000	11	22057000	1905200	1785700	850870	0.0161467	0.022694	0.0119527	3	0.0169311	0.00442006	1212100	1253100	578280	0.00973335	0.0144888	0.0081579	3	0.0107934	0.00269108
P161_RS0102135	P161_RS0102135	416	acyl-CoA desaturase			3	3	3	0	0	0	0	0	0	1	2	2	8	42.294	5793500	0	0	0	0	0	0	864330	3198900	1730300	9	293520	0	0	0	0	0	0	0	0	0	0	0	0	0	0	0	0	0	0
P161_RS0102140	P161_RS0102140	417	pyridoxal phosphate-dependent aminotransferase			25	25	25	21	20	18	22	20	21	24	25	21	80.6	41.454	11590000000	777920000	524140000	285140000	1312200000	418180000	494400000	3.0963e+09	3.0196e+09	1.6625e+09	20	319040000	23284000	15982000	10864000	0.197334	0.203111	0.152613	3	0.184353	0.0225668	32500000	14312000	16079000	0.26098	0.165481	0.226829	3	0.217763	0.0395109
P161_RS0102155	P161_RS0102155	420	cell division protein FtsZ			32	32	32	21	21	17	17	12	14	21	21	22	50	68.789	557810000	76751000	47604000	47046000	19026000	11966000	13203000	161070000	101650000	79489000	32	9661700	1508600	878360	1061400	0.0127855	0.0111629	0.0149101	3	0.0129528	0.00153439	281930	223700	208140	0.00226394	0.00258651	0.00293627	3	0.00259557	0.00027455
P161_RS0102160	P161_RS0102160	421	cell division protein FtsA			25	25	25	14	16	20	13	15	12	18	16	18	67.9	48.744	1.9887e+09	144270000	43803000	215230000	81862000	89994000	40628000	408550000	283320000	681090000	23	35143000	3859400	1328200	5074400	0.0327088	0.0168798	0.0712832	3	0.0402906	0.022848	2180600	2276800	1182000	0.0175106	0.0263253	0.0166747	3	0.0201702	0.00436566
P161_RS0102165	P161_RS0102165	422	hypothetical protein			12	12	12	9	8	5	5	6	4	8	8	10	49.4	27.788	65156000	9451700	5912200	1922500	3327400	3051900	1884000	15314000	10621000	13671000	14	3478200	642480	376460	137320	0.00544508	0.00478433	0.00192902	3	0.00405281	0.00152578	224290	200860	134570	0.00180108	0.00232242	0.0018984	3	0.0020073	0.000226337
P161_RS0102170	P161_RS0102170	423	UDP-N-acetylmuramate--L-alanine ligase			14	14	14	4	5	6	10	9	4	6	4	5	40.8	51.883	172970000	14338000	7737000	23299000	15265000	15738000	4788300	27060000	23379000	41365000	20	6794100	619970	386850	1164900	0.0052543	0.00491638	0.0163641	3	0.00884491	0.00531863	508110	651220	220490	0.0040802	0.00752966	0.00311049	3	0.00490678	0.00189643
P161_RS0102175	P161_RS0102175	424	undecaprenyldiphospho-muramoylpentapeptide beta-N-acetylglucosaminyltransferase	CAZyme, single-domain, contains GT28 domain		16	16	16	11	11	8	13	10	8	12	11	9	50.1	40.913	145020000	12074000	14019000	6677100	18434000	6762100	5352900	41852000	25724000	14127000	20	4108200	487650	526950	286740	0.00413288	0.00669687	0.00402801	3	0.00495259	0.00123414	586240	243330	204060	0.0047076	0.00281348	0.00287871	3	0.0034666	0.000877927
P161_RS0102185	P161_RS0102185	426	UDP-N-acetylmuramoyl-L-alanine--D-glutamate ligase			12	12	12	6	5	11	8	6	6	7	3	5	34.9	51.315	114280000	10596000	3554700	19167000	13331000	8350900	5687700	33310000	2705300	17581000	24	2347700	241050	103990	382840	0.00204292	0.00132158	0.00537799	3	0.00291416	0.0017669	280510	128310	123640	0.00225254	0.00148357	0.00174421	3	0.00182677	0.000319313
P161_RS0102190	P161_RS0102190	427	phospho-N-acetylmuramoyl-pentapeptide-transferase			6	6	6	4	3	4	4	3	3	4	5	1	11.3	45.432	57799000	10921000	7413800	7534200	10406000	2091600	3838300	7935800	6817800	840340	17	3064900	581500	430630	311230	0.00492827	0.00547277	0.00437204	3	0.00492436	0.000449379	560550	102710	184410	0.00450131	0.00118757	0.0026015	3	0.00276346	0.00135766
P161_RS0102195	P161_RS0102195	428	UDP-N-acetylmuramoyl-L-alanyl-D-glutamate--2,6-diaminopimelate ligase			17	17	17	11	10	13	10	9	8	8	9	7	41.8	54.178	275940000	34425000	19298000	31570000	28503000	14303000	20082000	42739000	38047000	46973000	26	8351300	970550	546780	821940	0.0082255	0.00694889	0.0115463	3	0.00890689	0.00193774	796810	489870	567270	0.00639851	0.00566407	0.00800258	3	0.00668838	0.000976447
P161_RS0102200	P161_RS0102200	429	transpeptidase family protein			14	14	14	1	4	3	9	4	9	3	8	6	25.9	73.624	59894000	643070	3148000	1279500	9596100	2005600	17729000	5922800	12915000	6655400	36	1092300	17863	35631	35541	0.000151391	0.000452825	0.000499266	3	0.000367827	0.000154214	266560	55711	107730	0.00214052	0.000644152	0.00151977	3	0.00143481	0.000613836
P161_RS0102210	P161_RS0102210	431	16S rRNA (cytosine(1402)-N(4))-methyltransferase RsmH			28	28	28	22	14	14	12	14	14	10	13	13	71.9	34.761	596140000	102640000	77431000	58646000	85586000	20261000	55876000	63452000	76902000	55346000	16	8274700	861580	1286700	1028700	0.00730197	0.0163523	0.0144508	3	0.0127017	0.0038963	1070000	610980	855210	0.00859227	0.00706439	0.0120646	3	0.00924042	0.00209214
P161_RS0102215	P161_RS0102215	432	division/cell wall cluster transcriptional repressor MraZ			9	9	9	6	6	4	4	6	5	4	3	4	50.3	17.737	169260000	25899000	12464000	9248700	14969000	19693000	16401000	13992000	29772000	26817000	9	17653000	2724900	1359700	1027600	0.0230938	0.0172801	0.0144353	3	0.0182697	0.0036034	1411600	1971400	1807600	0.0113354	0.0227941	0.0255001	3	0.0198765	0.00613972
P161_RS0102225	P161_RS0102225	433	alpha/beta hydrolase			18	18	18	13	13	10	10	10	11	16	13	12	74.8	28.584	968810000	70594000	87575000	49463000	26782000	25491000	68285000	270460000	245620000	124530000	13	42694000	3250000	3942100	2110700	0.027544	0.0500991	0.0296503	3	0.0357645	0.0101725	967800	1136500	3046100	0.00777159	0.0131407	0.0429719	3	0.0212947	0.015484
P161_RS0102230	P161_RS0102230	434	YihA family ribosome biogenesis GTP-binding protein			9	9	9	5	5	5	7	6	6	5	5	5	43.3	23.479	60275000	9484800	2219600	1435000	8790700	6262500	1686500	9304600	11825000	9266000	10	4985600	731950	173890	94219	0.00620334	0.00220992	0.00132355	3	0.00324561	0.00212251	714400	626250	168650	0.00573675	0.00724095	0.00237917	3	0.00511896	0.00203231
P161_RS0102235	P161_RS0102235	435	RluA family pseudouridine synthase			6	6	6	0	1	0	0	2	0	4	3	2	28.1	26.203	10973000	0	0	0	0	231440	0	1700000	7167900	1873800	12	668280	0	0	0	0	0	0	0	0	0	0	19286	0	0	0.000222992	0	1	0	0
P161_RS0102245	P161_RS0102245	437	nitroreductase family protein			8	8	8	3	2	1	2	4	3	6	6	4	35.5	27.941	76145000	3557600	3656300	1811000	5771300	3911900	2080000	15056000	23036000	17266000	10	6475600	355760	365630	181100	0.0030151	0.0046467	0.00254402	3	0.00340194	0.000900942	577130	339190	177440	0.00463445	0.00392185	0.00250318	3	0.00368649	0.00088586
P161_RS0102250	P161_RS0102250	438	hypothetical protein			7	7	7	2	3	3	1	0	0	1	3	1	47.6	24.278	298110000	1036700	1287100	266450000	1804300	0	0	11010000	8296900	8225900	14	32863	74051	28067	4796.3	0.000627589	0.000356696	6.73766e-05	3	0.000350554	0.000228747	128880	0	0	0.00103493	0	0	1	0	0
P161_RS0102260	P161_RS0102260	440	penicillin acylase family protein			27	27	27	19	18	15	8	9	5	10	17	15	37.7	89.795	197970000	26323000	19162000	23180000	7249200	9860400	5568900	44652000	41172000	20801000	44	3598000	519600	372170	464620	0.00440366	0.00472981	0.0065268	3	0.00522009	0.000933528	151660	212550	114000	0.00121785	0.00245759	0.00160822	3	0.00176122	0.000517553
P161_RS0102265	P161_RS0102265	441	DegT/DnrJ/EryC1/StrS family aminotransferase			22	22	22	18	17	15	18	17	18	20	22	19	72.4	43.069	3.2647e+09	194790000	114400000	93097000	505010000	157700000	249270000	743760000	754980000	451680000	18	76463000	5185300	3423500	2834500	0.0439459	0.0435084	0.039818	3	0.0424241	0.00185144	11408000	4814700	5933600	0.091608	0.0556694	0.0837063	3	0.0769946	0.0154204
P161_RS0102270	P161_RS0102270	442	UDP-glucose 4-epimerase GalE			40	40	40	30	31	30	31	27	27	33	36	31	72.7	37.263	23562000000	1409500000	1390900000	994860000	2382200000	1185900000	781860000	6.8576e+09	5217500000	3.3418e+09	17	416370000	26069000	24314000	22808000	0.220937	0.309	0.320398	3	0.283445	0.0444441	44270000	22114000	14353000	0.355495	0.255691	0.20248	3	0.271222	0.0634261
P161_RS0102275	P161_RS0102275	443	DUF2911 domain-containing protein			4	4	4	0	0	0	1	0	1	0	2	1	27.2	20.024	10776000	0	0	0	753540	0	108990	0	8527200	1386400	6	18165	0	0	0	0	0	0	0	0	0	125590	0	18165	0.00100851	0	0.000256257	2	0.000632382	0.000427997
P161_RS0102285	P161_RS0102285	445	ferrous iron transport protein B			29	29	29	24	22	22	27	22	20	22	23	22	45.7	77.952	1166000000	97271000	56646000	144360000	125170000	76784000	60374000	228930000	198060000	178400000	32	22562000	2116400	1165400	2717000	0.0179367	0.0148108	0.0381674	3	0.0236383	0.0103526	2491400	1660800	1153500	0.0200063	0.0192028	0.0162726	3	0.0184939	0.00160459
P161_RS0102295	P161_RS0102295	447	SCO family protein			11	11	11	7	5	4	2	4	5	7	7	7	40.7	26.5	77443000	8424300	7529700	4480900	619640	3229400	489200	16338000	19463000	16868000	10	4031500	525910	524730	88901	0.00445714	0.00666866	0.00124885	3	0.00412488	0.00222507	61964	83175	37797	0.000497581	0.000961702	0.000533209	3	0.000664164	0.000210893
P161_RS0102300	P161_RS0102300	448	RIP metalloprotease RseP			32	32	32	17	18	14	16	19	19	23	23	22	48.1	51.351	1.0604e+09	108360000	48528000	45332000	105250000	51352000	75383000	185710000	145100000	295440000	22	33643000	3840400	1795400	1809400	0.0325477	0.0228173	0.0254177	3	0.0269276	0.00411341	2720300	1610800	2248200	0.0218444	0.0186247	0.0317157	3	0.0240616	0.00556961
P161_RS0102310	P161_RS0102310	450	cupin			14	14	14	13	7	8	9	5	7	6	6	6	46.3	33.786	93478000	14281000	8690300	4458100	12447000	1479900	4306700	20020000	17062000	10733000	17	3592300	624080	333760	211020	0.00528914	0.00424167	0.00296433	3	0.00416504	0.000950645	517660	74741	179500	0.00415689	0.000864185	0.00253224	3	0.00251777	0.00134428
P161_RS0102315	P161_RS0102315	451	biotin synthase BioB			13	13	13	6	4	3	7	1	3	11	12	11	38.1	40.833	205510000	6229200	4707500	4189300	7189600	1344100	1441200	51408000	92492000	36508000	17	4512100	230480	154690	178910	0.00195334	0.00196592	0.00251326	3	0.00214417	0.000261034	234630	79067	46554	0.00188412	0.000914204	0.000656745	3	0.00115169	0.000528463
P161_RS0102320	P161_RS0102320	452	AAA domain-containing protein			79	79	79	20	37	23	59	49	29	58	40	47	53.4	186.48	620860000	7174600	28382000	15654000	75788000	41570000	26645000	219330000	123720000	82593000	96	4320300	34575	216820	145010	0.000293026	0.00275551	0.00203704	3	0.00169519	0.00103396	676650	311620	128570	0.00543361	0.00360307	0.00181376	3	0.00361681	0.00147783
P161_RS0102325	P161_RS0102325	453	hypothetical protein			65	65	65	29	39	20	46	43	34	45	49	46	66.8	76.861	1.7524e+09	61845000	57843000	19062000	142500000	93076000	133930000	682460000	357280000	204420000	37	22670000	980890	957540	338340	0.00831313	0.0121691	0.00475287	3	0.00841171	0.00302848	2034800	1479500	2117100	0.0163398	0.0171066	0.0298663	3	0.0211042	0.00620364
P161_RS0102330	P161_RS0102330	454	hypothetical protein			12	12	12	3	2	3	2	6	4	6	7	9	36.2	25.25	82968000	1762300	2046900	1709200	2887000	5086800	7823700	22563000	18648000	20442000	8	5078400	159400	172860	128410	0.00135093	0.00219683	0.00180385	3	0.00178387	0.000345628	185310	410220	138300	0.00148807	0.00474312	0.00195102	3	0.0027274	0.0014378
P161_RS0102335	P161_RS0102335	455	phage-shock protein			15	15	15	3	4	5	6	6	3	12	11	8	60.9	26.535	157740000	2525100	3802300	3019700	8564600	3242900	758720	59211000	41603000	35009000	13	2254800	49610	78905	66231	0.000420449	0.00100278	0.000930387	3	0.00078454	0.000259142	144900	136300	20832	0.00116357	0.00157595	0.000293881	3	0.00101113	0.000534388
P161_RS0102340	P161_RS0102340	456	hypothetical protein			2	2	2	1	1	0	1	1	0	1	1	1	13	15.238	14337000	1063100	546190	0	1097300	1502800	0	2880200	4244900	3002800	3	4779100	354380	182060	0	0.0030034	0.00231375	0	2	0.00265858	0.0012845	365770	500930	0	0.00293719	0.00579195	0	2	0.00436457	0.00236463
P161_RS0102345	P161_RS0102345	457	helix-turn-helix transcriptional regulator	TR|Xre		14	14	14	6	5	7	6	9	5	10	8	11	65.1	29.067	105330000	7480800	6599900	5101400	8084400	6623000	3559000	28385000	20962000	18532000	12	6484400	546350	549990	310170	0.00463037	0.00698968	0.00435715	3	0.00532573	0.00118187	628700	388480	296580	0.00504856	0.00449176	0.00418391	3	0.00457474	0.000357838
P161_RS0102355	P161_RS0102355	459	phytoene desaturase			6	6	6	2	2	2	2	1	1	3	0	4	14.8	54.805	20713000	1192500	276010	1320800	1257900	761920	231660	10303000	0	5369500	22	758140	54203	12546	60037	0.000459375	0.000159444	0.000843376	3	0.000487399	0.000279917	57175	34633	10530	0.000459124	0.00040044	0.000148549	3	0.000336038	0.000134722
P161_RS0102365	P161_RS0102365	461	beta-ketoacyl synthase			2	2	2	0	0	0	1	1	0	1	1	0	4.8	43.221	0	0	0	0	0	0	0	0	0	0	12	0	0	0	0	0	0	0	0	0	0	0	0	0	0	0	0	0	0	0
P161_RS0102370	P161_RS0102370	462	adenosylmethionine--8-amino-7-oxononanoate transaminase			17	17	17	11	11	10	11	9	13	10	11	9	45.4	47.596	406570000	31310000	23307000	8947400	87493000	11087000	46625000	87891000	52395000	57512000	22	9043400	731010	653690	285900	0.00619538	0.00830758	0.00401621	3	0.00617306	0.00175201	1874900	413100	1089300	0.0150557	0.00477642	0.0153669	3	0.011733	0.00492071
P161_RS17910	P161_RS17910	463	pyridoxal phosphate-dependent aminotransferase family protein			4	4	4	3	2	3	2	2	2	3	2	3	12.8	44.822	20799000	391100	501960	1474700	1466400	1608500	1124400	5643300	5686800	2901800	17	1115700	23006	21503	76656	0.000194978	0.000273276	0.00107683	3	0.000515029	0.00039854	51081	94617	66143	0.000410189	0.001094	0.000933091	3	0.000812426	0.000291912
P161_RS0102380	P161_RS0102380	464	hypothetical protein			4	4	4	1	2	2	3	3	2	2	2	1	40	14.38	28811000	1312800	1681200	944580	5355000	5056700	1680600	7671800	3548300	1560300	8	3419500	164090	210150	118070	0.00139068	0.00267074	0.0016586	3	0.00190667	0.000551239	669380	632090	210080	0.00537523	0.00730847	0.00296363	3	0.00521578	0.00177735
P161_RS0102385	P161_RS0102385	465	dethiobiotin synthase			7	7	7	6	4	4	2	4	3	5	3	6	50.2	22.729	71489000	8268300	7225400	4437700	3277700	5342500	1766800	15801000	9326300	16044000	10	6273300	749180	722540	443770	0.00634937	0.00918258	0.00623391	3	0.00725528	0.00136362	327770	534250	176680	0.00263204	0.00617721	0.00249246	3	0.00376724	0.00170506
P161_RS0102430	P161_RS0102430	473	S9 family peptidase	*		48	48	48	36	31	35	32	36	29	29	36	35	53.1	96.981	2544700000	245310000	112360000	105150000	167970000	116050000	165740000	390110000	517960000	724090000	47	35364000	3332400	1702000	1424800	0.0282424	0.0216303	0.020015	3	0.0232959	0.00355932	2345300	1826200	2015200	0.0188331	0.0211152	0.0284288	3	0.0227924	0.00409298
P161_RS0102435	P161_RS0102435	474	nucleoside deaminase			2	2	2	1	1	0	1	0	1	0	1	0	17.4	16.806	1070700	197340	0	0	177240	0	696120	0	0	0	7	53512	28192	0	0	0.00023893	0	0	1	0	0	25320	0	99445	0.000203324	0	0.00140289	2	0.000803106	0.000618995
P161_RS0102440	P161_RS0102440	475	1-deoxy-D-xylulose-5-phosphate synthase			20	20	20	10	6	12	11	9	12	15	15	14	37.8	64.933	260430000	13793000	7239700	19086000	22665000	9499500	9024300	72949000	66911000	39261000	24	8244100	519050	291580	687490	0.004399	0.00370562	0.00965759	3	0.00592073	0.00265748	790860	325210	318680	0.00635073	0.00376021	0.00449567	3	0.00486887	0.00109
P161_RS0102450	P161_RS0102450	477	hypothetical protein			11	11	11	7	6	5	5	7	7	6	4	5	62.5	16.711	168040000	34012000	13387000	4947100	14199000	14558000	9034700	24646000	32050000	21202000	7	17513000	3002100	1287300	393810	0.0254431	0.01636	0.00553209	3	0.0157784	0.00813902	1200300	1969900	794000	0.0096386	0.0227768	0.0112011	3	0.0145388	0.00585992
P161_RS0102455	P161_RS0102455	478	T9SS type A sorting domain-containing protein			39	39	39	31	30	28	29	27	30	28	33	30	55.9	98.889	3.8433e+09	279320000	203670000	165450000	381880000	196660000	275140000	677130000	754740000	909260000	42	60960000	4300300	3389500	2629200	0.0364454	0.0430763	0.036934	3	0.0388186	0.00301726	6075100	3392500	4164900	0.048784	0.0392254	0.058755	3	0.0489215	0.0079735
P161_RS0102460	P161_RS0102460	479	deoxyguanosinetriphosphate triphosphohydrolase			24	24	23	14	12	14	11	14	18	14	12	13	60.1	50.627	633890000	48555000	21097000	13351000	83711000	32952000	133590000	118710000	94431000	87490000	20	15003000	1249500	632680	406250	0.0105896	0.00804057	0.00570684	3	0.00811235	0.00199403	2275200	670010	1705900	0.0182702	0.00774692	0.0240654	3	0.0166942	0.00675457
P161_RS0102465	P161_RS0102465	480	HTH domain-containing protein	TR|LexA		19	19	19	10	6	6	7	11	12	9	12	9	41.9	51.144	219220000	13221000	4185600	3436400	43908000	7856500	20731000	47558000	43098000	35224000	23	4067400	334840	100850	128930	0.0028378	0.00128168	0.00181116	3	0.00197688	0.000646002	347780	284240	588430	0.00279273	0.00328649	0.00830108	3	0.00479344	0.00248846
P161_RS0102470	P161_RS0102470	481	ribonucleoside-diphosphate reductase subunit alpha			42	42	42	33	27	35	16	18	19	27	28	28	66.4	67.278	2266300000	452700000	143410000	364960000	69581000	72162000	30688000	441490000	320530000	370820000	26	45127000	9205500	3446000	6593400	0.0780175	0.0437943	0.0926215	3	0.0714778	0.020463	1654000	1622600	702530	0.0132819	0.0187611	0.00991071	3	0.0139846	0.00364718
P161_RS0102475	P161_RS0102475	482	ribonucleotide reductase			49	49	49	45	40	41	33	31	34	39	40	40	74.8	49.311	9199800000	943960000	437330000	892050000	652060000	191940000	424900000	1.7889e+09	1284700000	2583900000	26	158320000	18463000	9589900	18170000	0.156476	0.121876	0.255245	3	0.177865	0.0565096	9034700	4697400	6564600	0.0725501	0.0543132	0.0926079	3	0.0731571	0.0156397
P161_RS0102480	P161_RS0102480	483	cold shock domain-containing protein			4	4	4	3	3	2	4	2	3	3	2	3	33.3	7.0578	202920000	16329000	12086000	4725100	22435000	19270000	5340600	76630000	21573000	24532000	3	59130000	5443100	4028700	1575000	0.0461308	0.0511997	0.022125	3	0.0398185	0.0126812	6760900	5890200	1780200	0.0542911	0.0681048	0.0251136	3	0.0491698	0.0179208
P161_RS0102485	P161_RS0102485	484	cytochrome oxidase assembly protein			5	5	5	1	2	3	1	1	1	4	2	1	10.6	39.394	13863000	793370	2722700	954210	314500	698800	873890	4514700	1861000	1129500	16	755830	49586	170170	59638	0.000420246	0.00216265	0.000837771	3	0.00114022	0.000742786	19656	43675	54618	0.000157841	0.000504987	0.000770506	3	0.000477778	0.000250858
P161_RS0102490	P161_RS0102490	485	NAD(P)-binding protein			19	19	19	8	11	10	11	12	12	11	10	12	51.1	47.803	316990000	16253000	14011000	6221000	56536000	23751000	35788000	88966000	37061000	38398000	20	9468200	500490	540390	250860	0.0042417	0.00686768	0.00352398	3	0.00487779	0.00143725	2025100	745540	1543300	0.0162619	0.00862022	0.0217716	3	0.0155512	0.00539249
P161_RS0102500	P161_RS0102500	487	GatB/YqeY domain-containing protein			11	11	11	11	10	9	9	8	10	10	8	9	45.6	16.403	605580000	57391000	35790000	20503000	56930000	52567000	34222000	126040000	114160000	107970000	9	57560000	4976100	3306900	1901800	0.0421729	0.0420265	0.0267157	3	0.0369717	0.00725232	4837200	4678600	3019100	0.0388435	0.0540958	0.042591	3	0.0451767	0.00648963
P161_RS0102505	P161_RS0102505	488	clan AA aspartic protease			5	5	5	3	3	3	4	4	4	4	3	2	35.6	16.742	108150000	9964800	6372500	3901600	8540200	10873000	7345600	32469000	17298000	11380000	5	7520200	350840	181290	93609	0.0029734	0.00230397	0.00131498	3	0.00219745	0.000681223	276270	896940	691960	0.00221849	0.0103708	0.0097616	3	0.00745029	0.00370779
P161_RS0102520	P161_RS0102520	490	NADH:ubiquinone reductase (Na(+)-transporting) subunit F			25	25	25	18	18	18	20	18	21	23	22	22	54.6	48.607	2.9271e+09	141470000	80100000	98118000	262670000	152110000	253650000	623550000	547230000	768250000	22	78916000	5331600	2415000	3824100	0.0451858	0.0306916	0.0537195	3	0.043199	0.00950548	7052500	4745200	5995600	0.0566327	0.0548659	0.084581	3	0.0653598	0.0136105
P161_RS0102530	P161_RS0102530	492	NADH:ubiquinone reductase (Na(+)-transporting) subunit D			4	4	4	2	2	2	0	2	2	2	3	2	27.1	22.994	107780000	18047000	8149300	4960500	0	5631000	2180300	17795000	37709000	13313000	8	13190000	2255900	986320	620060	0.019119	0.0125349	0.00871036	3	0.0134547	0.00429878	0	703880	272530	0	0.00813854	0.00384463	2	0.00599158	0.00332423
P161_RS0102535	P161_RS0102535	493	Na(+)-translocating NADH-quinone reductase subunit C			24	24	24	17	14	17	17	11	15	18	18	16	67.7	30.077	4895200000	446320000	564650000	251210000	542670000	108350000	328050000	1079000000	686670000	888280000	13	182290000	17711000	22197000	9096200	0.150102	0.282096	0.12778	3	0.186659	0.0680964	23677000	4702200	10166000	0.19013	0.0543687	0.143414	3	0.129304	0.0563152
P161_RS0102540	P161_RS0102540	494	NADH:ubiquinone reductase (Na(+)-transporting) subunit B			5	5	5	2	2	3	3	3	2	3	4	3	13.6	44.821	83406000	1771300	2942000	5007500	4793700	1785600	3740500	26748000	24530000	12087000	9	3399800	196810	326890	185400	0.00166798	0.00415436	0.00260443	3	0.00280892	0.00102531	60624	115410	50500	0.00048682	0.00133442	0.000712412	3	0.000844549	0.000358422
P161_RS0102545	P161_RS0102545	495	Na(+)-translocating NADH-quinone reductase subunit A			41	41	41	26	24	30	27	27	25	30	33	30	82.4	49.343	10030000000	614120000	277920000	746510000	544790000	454660000	251420000	2.0994e+09	1.6492e+09	3.3918e+09	26	150190000	10425000	5176200	12307000	0.0883528	0.065783	0.172884	3	0.109007	0.0460983	7876600	8109000	4352100	0.0632503	0.0937594	0.0613958	3	0.0728019	0.0148386
P161_RS0102550	P161_RS0102550	496	DUF5103 domain-containing protein			15	15	15	9	9	9	10	12	12	10	11	12	45.2	47.71	906040000	69517000	25991000	23034000	149940000	62542000	138470000	137570000	124720000	174260000	21	22556000	1759100	934100	768820	0.0149085	0.0118712	0.0108001	3	0.0125266	0.00174011	4366400	1517100	2771700	0.0350629	0.0175413	0.0391008	3	0.0305683	0.00935785
P161_RS0102555	P161_RS0102555	497	Co2+/Mg2+ efflux protein ApaG			2	2	2	0	0	0	1	1	0	2	0	0	21.9	14.655	3391300	0	0	0	0	1433600	0	1957600	0	0	7	484470	0	0	0	0	0	0	0	0	0	0	204800	0	0	0.00236798	0	1	0	0
P161_RS0102560	P161_RS0102560	498	DUF3667 domain-containing protein			8	8	8	2	1	2	3	3	3	6	3	3	19.2	44.874	25162000	15352000	311870	0	1361900	1131000	1334300	3115700	1854800	700870	18	1296900	852870	17326	0	0.00722815	0.000220192	0	2	0.00372417	0.00335669	75663	62834	74126	0.000607586	0.000726511	0.00104571	3	0.000793268	0.000184987
P161_RS0102565	P161_RS0102565	499	hypothetical protein			5	5	5	3	2	1	0	3	0	2	1	2	32.3	27.069	5823900	736730	573170	556110	0	532620	0	1104000	1336600	984630	12	179220	37039	23823	46343	0.000313909	0.00030276	0.000651008	3	0.000422559	0.000161602	0	44385	0	0	0.000513197	0	1	0	0
P161_RS0102570	P161_RS0102570	500	L-glutamate gamma-semialdehyde dehydrogenase			48	48	48	40	36	42	38	36	36	36	40	40	78	59.714	13571000000	1.6036e+09	544990000	1399200000	938470000	661730000	520480000	2499200000	2572400000	2830700000	31	226270000	26817000	11628000	25876000	0.227277	0.147777	0.363496	3	0.246183	0.0890758	15353000	14162000	10192000	0.123287	0.163747	0.14378	3	0.143605	0.016518
P161_RS0102580	P161_RS0102580	502	hypothetical protein			6	6	6	5	4	2	2	3	1	5	5	4	27.6	25.36	46203000	4523700	5298500	1976100	2035800	2418300	1333000	9676500	9144100	9797000	6	5514300	531040	572920	329360	0.00450061	0.00728109	0.00462672	3	0.00546948	0.00128204	169420	403050	222160	0.00136047	0.00466022	0.00313405	3	0.00305158	0.00134838
P161_RS17915	P161_RS17915	503	T9SS type A sorting domain-containing protein			10	10	10	5	5	5	7	6	6	7	8	7	12.7	136.46	155150000	4380600	3228300	3639400	10788000	13411000	13173000	42569000	26026000	37929000	31	3283000	141310	83861	73321	0.00119762	0.00106577	0.00102998	3	0.00109779	7.20834e-05	211300	344900	139170	0.00169677	0.00398787	0.0019633	3	0.00254931	0.00102302
P161_RS0102590	P161_RS0102590	504	lipoyl(octanoyl) transferase LipB			11	11	11	6	6	6	6	6	4	9	6	7	53	26.795	136770000	8778700	11958000	5214400	15136000	4893900	1463300	36872000	26488000	25965000	10	10823000	877870	784390	489150	0.00744003	0.00996861	0.00687139	3	0.00809334	0.00134618	1513600	489390	104800	0.0121544	0.00565852	0.00147843	3	0.00643047	0.00439251
P161_RS0102595	P161_RS0102595	505	hypothetical protein			5	5	5	4	1	0	1	3	1	2	2	1	38.4	15.074	24328000	7795200	1691400	0	1716900	3566900	1385000	5727900	1767000	677980	9	2393100	866130	187940	0	0.00734053	0.00238848	0	2	0.00486451	0.00305707	190770	357940	153890	0.00153191	0.00413864	0.00217095	3	0.00261384	0.00110931
P161_RS0102600	P161_RS0102600	506	nucleoid-associated protein			18	18	18	15	10	11	10	11	9	12	10	10	49.4	41.03	260650000	21550000	9533600	15298000	17583000	8248700	7092100	106090000	46047000	29208000	22	5898800	427750	275930	340550	0.00362522	0.00350672	0.00478391	3	0.00397195	0.000576178	309000	231770	196780	0.00248132	0.00267982	0.00277601	3	0.00264571	0.0001227
P161_RS0102605	P161_RS0102605	507	ribonuclease HII			2	2	2	0	0	0	0	1	1	2	2	1	11.6	22.765	10712000	0	0	0	0	407350	234730	3168400	4831400	2070500	10	499350	0	0	0	0	0	0	0	0	0	0	40735	23473	0	0.000470994	0.000331138	2	0.000401066	0.000197497
P161_RS0102610	P161_RS0102610	508	putative porin			27	27	27	16	14	8	18	16	18	16	20	16	50.3	75.591	298610000	21611000	18074000	13208000	25749000	19846000	25351000	74497000	67693000	32580000	30	6880400	638640	444010	111290	0.00541253	0.00564281	0.00156336	3	0.00420623	0.00187116	713960	580920	641490	0.00573321	0.00671682	0.00904961	3	0.00716655	0.00139076
P161_RS0102630	P161_RS0102630	512	cytochrome P450			21	21	21	11	8	4	9	12	11	11	11	13	52.9	51.387	269260000	12464000	5579900	2079500	31097000	22894000	61755000	39645000	27985000	65759000	25	3880200	326580	130630	47522	0.0027678	0.00166014	0.000667571	3	0.0016985	0.000857842	813680	287300	629960	0.00653398	0.00332187	0.00888695	3	0.0062476	0.00228094
P161_RS0102640	P161_RS0102640	514	HAMP domain-containing histidine kinase	HK|Classic		7	7	7	3	1	2	1	5	3	3	3	3	17.1	48.594	21219000	3227700	512590	660090	1796100	2648300	1203900	4349100	4368200	2453000	21	704570	98090	24409	31433	0.000831322	0.000310208	0.000441559	3	0.000527696	0.000221291	85528	126110	57326	0.000686803	0.00145813	0.000808708	3	0.000984548	0.000338553
P161_RS0102655	P161_RS0102655	517	Na+/H+ antiporter NhaC			4	4	4	2	3	1	3	2	2	3	4	2	6.1	52.391	66581000	1965200	3508600	1851400	6422400	3660600	2609300	18285000	17269000	11010000	5	3245100	194340	222960	370280	0.00164705	0.00283354	0.00520155	3	0.00322738	0.0014776	102500	352040	102470	0.000823091	0.00407042	0.00144556	3	0.00211303	0.00140723
P161_RS0102665	P161_RS0102665	519	aminotransferase class I/II-fold pyridoxal phosphate-dependent enzyme			10	10	10	0	1	0	0	0	1	9	4	6	29.8	43.234	86999000	0	15666000	0	0	0	132600	40050000	18678000	12473000	20	3455200	0	783290	0	0	0.00995463	0	1	0	0	0	0	6630	0	0	9.35306e-05	1	0	0
P161_RS0102670	P161_RS0102670	520	Lrp/AsnC family transcriptional regulator	TR|AsnC		6	6	6	4	1	2	3	3	3	3	3	5	36.8	17.83	82649000	7502200	4315300	2844000	10282000	7140800	3882100	17282000	17794000	11607000	9	7051800	636650	479480	316000	0.00539567	0.00609359	0.00443904	3	0.00530943	0.000678211	912180	793420	382190	0.00732495	0.00917383	0.00539162	3	0.0072968	0.00154421
P161_RS0102675	P161_RS0102675	521	DUF3857 domain-containing protein			44	44	44	8	8	8	14	13	11	25	37	35	59.1	77.492	836170000	10167000	8885200	9039800	30002000	21101000	19795000	290780000	253060000	193340000	38	16365000	249100	233820	237890	0.00211115	0.00297156	0.00334179	3	0.00280816	0.000515521	769400	530900	455610	0.0061784	0.00613847	0.00642737	3	0.00624808	0.000127819
P161_RS0102680	P161_RS0102680	522	DUF3857 domain-containing protein			30	30	30	2	1	0	12	12	6	17	24	20	53.1	73.487	294880000	763650	931910	0	35975000	13348000	4165100	116400000	76573000	46719000	33	3840800	23141	28240	0	0.000196122	0.000358895	0	2	0.000277509	0.000146729	112910	296070	112730	0.000906685	0.00342328	0.0015903	3	0.00197342	0.00106251
P161_RS0102690	P161_RS0102690	523	YceI family protein			16	16	16	12	11	10	11	11	7	13	14	14	55.2	22.979	6.4628e+09	736550000	378940000	236880000	519820000	521210000	186380000	1223000000	1.4995e+09	1160500000	10	510200000	56587000	30789000	19707000	0.47958	0.391289	0.276836	3	0.382569	0.0829992	44938000	46985000	15885000	0.360859	0.543259	0.224092	3	0.37607	0.130742
P161_RS0102695	P161_RS0102695	524	tRNA threonylcarbamoyladenosine dehydratase			7	7	7	2	2	2	2	5	0	3	3	2	30.8	26.163	16012000	830290	647270	383800	1212200	2245100	0	4350800	4146400	2195700	12	1243000	69191	53939	31983	0.0005864	0.000685497	0.000449285	3	0.000573727	9.68487e-05	101020	95765	0	0.000811207	0.00110727	0	2	0.000959239	0.000468065
P161_RS0102700	P161_RS0102700	525	hypothetical protein			2	2	2	1	0	0	0	0	0	0	1	0	12.1	24.794	1394900	191090	0	0	0	0	0	0	1203800	0	13	14699	14699	0	0	0.000124575	0	0	1	0	0	0	0	0	0	0	0	0	0	0
P161_RS0102705	P161_RS0102705	526	D-tyrosyl-tRNA(Tyr) deacylase			3	3	3	1	1	1	3	3	3	3	0	1	24	16.678	10103000	611610	396710	319660	2311500	2801200	823460	2111500	0	727830	8	1140500	76451	49588	39958	0.000647929	0.000630201	0.000561314	3	0.000613148	3.73598e-05	166470	350150	102930	0.00133678	0.00404857	0.00145205	3	0.00227913	0.00125207
P161_RS0102710	P161_RS0102710	527	SMI1/KNR4 family protein			5	5	5	1	1	1	2	1	1	3	1	4	21.7	28.713	9405600	165030	203330	163950	1170200	459620	0	2190500	2282200	2770700	13	697820	12695	15641	12612	0.000107591	0.000198777	0.000177168	3	0.000161179	3.89056e-05	90014	35355	0	0.000722827	0.000408788	0	2	0.000565807	0.000295937
P161_RS0102715	P161_RS0102715	528	ribosome small subunit-dependent GTPase A			18	18	18	6	6	7	10	7	9	13	11	6	43.5	36.284	199890000	3464800	3340600	8428600	26785000	7660200	12612000	75860000	25651000	36088000	22	4763300	157490	114140	225410	0.00133474	0.00145058	0.00316647	3	0.00198393	0.000837519	832880	243740	393140	0.00668816	0.00281822	0.00554609	3	0.00501749	0.00162351
P161_RS0102720	P161_RS0102720	529	insulinase family protein			48	48	48	14	14	15	22	29	27	27	35	32	55.9	105.78	2888500000	60356000	31096000	41808000	166080000	93443000	112430000	906880000	677180000	799240000	45	24649000	831460	401370	577170	0.0070467	0.00510091	0.00810786	3	0.00675182	0.00124516	1825300	1231300	1409100	0.0146574	0.0142368	0.0198784	3	0.0162575	0.0025661
P161_RS0102725	P161_RS0102725	530	bifunctional 3-deoxy-7-phosphoheptulonate synthase/chorismate mutase type II			40	40	40	31	29	27	35	33	32	33	33	33	83.1	40.478	21294000000	1.5036e+09	932990000	729840000	4322500000	838050000	1.7459e+09	5262000000	3.6589e+09	2299900000	21	343510000	30426000	21166000	16939000	0.257863	0.268993	0.237952	3	0.254936	0.0128402	87594000	19440000	25217000	0.703394	0.224773	0.355741	3	0.427969	0.201961
P161_RS0102730	P161_RS0102730	531	prephenate dehydrogenase			23	23	23	17	19	16	18	14	16	15	16	15	78.4	31.619	1.4903e+09	141980000	143310000	108490000	268260000	43931000	234270000	166760000	161340000	221950000	17	41674000	3974300	4203800	3226700	0.0336826	0.053425	0.0453274	3	0.044145	0.00810307	7040100	1844200	3381300	0.0565331	0.0213234	0.0477006	3	0.0418524	0.0149573
P161_RS0102735	P161_RS0102735	532	aminotransferase class I/II-fold pyridoxal phosphate-dependent enzyme			34	34	34	22	21	20	25	22	23	28	24	23	88.2	42.754	3.4822e+09	338720000	196830000	99633000	655180000	111370000	187200000	754570000	697380000	441300000	20	85707000	9155200	5776400	3404800	0.0775912	0.0734108	0.0478293	3	0.0662771	0.0131557	14525000	3633700	5857300	0.116638	0.0420143	0.0826299	3	0.0804274	0.0305048
P161_RS0102740	P161_RS0102740	533	hypothetical protein			14	14	14	11	9	8	9	10	10	10	8	9	50.7	30.681	634800000	79137000	70710000	51124000	81749000	22686000	63813000	79419000	78154000	108010000	12	21993000	2685300	2538700	1810500	0.0227582	0.0322637	0.0254332	3	0.0268183	0.00400231	2867100	996480	1455600	0.0230233	0.0115217	0.0205344	3	0.0183598	0.00494087
P161_RS0102745	P161_RS0102745	534	UDP-glucose--hexose-1-phosphate uridylyltransferase			27	27	27	13	12	11	18	15	16	20	21	13	56.2	39.128	380220000	21427000	12517000	14411000	34266000	17422000	13567000	140300000	79976000	46333000	21	8547700	450580	425520	414450	0.00381871	0.00540782	0.00582203	3	0.00501619	0.000863467	836340	256460	471340	0.00671594	0.00296529	0.00664927	3	0.0054435	0.00175257
P161_RS0102750	P161_RS0102750	535	galactokinase			20	20	20	12	12	7	15	13	12	17	14	13	53.4	42.273	337320000	11682000	14519000	6946900	43799000	16129000	14068000	107910000	87573000	34698000	24	7892000	305010	305680	228400	0.00258499	0.00388481	0.00320847	3	0.00322609	0.000530796	1106700	415760	392040	0.00888698	0.00480718	0.00553058	3	0.00640824	0.00177743
P161_RS17925	P161_RS17925	536	aldose 1-epimerase			25	25	25	11	12	11	13	14	17	20	18	16	60.1	34.436	638700000	28713000	26214000	30653000	62671000	24642000	49827000	195870000	122720000	97388000	18	19745000	1165800	888390	1020600	0.00988026	0.0112903	0.014337	3	0.0118359	0.0018599	2258500	984630	1615200	0.0181361	0.0113847	0.0227859	3	0.0174356	0.00468082
P161_RS0102760	P161_RS0102760	537	GntR family transcriptional regulator	TR|GntR		8	8	8	2	0	1	1	2	1	5	2	1	27.4	38.062	10775000	433770	0	430520	541590	230340	0	3052500	1644200	4441800	18	216860	24098	0	23918	0.000204233	0	0.000335991	2	0.000270112	0.000138227	30088	12797	0	0.000241611	0.000147964	0	2	0.000194788	9.94648e-05
P161_RS0102765	P161_RS0102765	538	formylglycine-generating enzyme family protein			19	19	19	12	11	10	13	14	11	16	14	14	51.1	41.284	606830000	28653000	23483000	18357000	61976000	32672000	19989000	155520000	202220000	63967000	21	10426000	594190	527940	277600	0.00503581	0.00670945	0.00389962	3	0.00521496	0.00115408	1128600	724560	449350	0.00906284	0.00837765	0.00633906	3	0.00792651	0.00115683
P161_RS0102770	P161_RS0102770	539	TonB-dependent receptor	SusC-like		38	38	38	17	19	21	24	23	22	16	22	20	50	94.232	501390000	42687000	30323000	30331000	56335000	36834000	44019000	89020000	91584000	80255000	40	8699400	745760	505720	509530	0.00632038	0.00642707	0.00715768	3	0.00663504	0.000372117	1009700	657310	735270	0.00810805	0.00760008	0.0103726	3	0.00869357	0.00120522
P161_RS0102790	P161_RS0102790	543	hypothetical protein			17	17	17	3	3	3	9	5	9	11	10	6	49.1	41.629	129600000	1499300	1883900	4342300	11978000	4612000	4424900	43424000	41663000	15777000	18	3018900	58297	47485	101410	0.000494072	0.000603475	0.00142457	3	0.000840705	0.000415262	255250	182710	218550	0.0020497	0.00211256	0.00308312	3	0.00241513	0.00047304
P161_RS0102795	P161_RS0102795	544	DNA-protecting protein DprA			5	5	5	1	1	2	2	2	1	2	3	0	12	41.566	34589000	459930	17067000	746880	868080	825500	470370	3812600	10338000	0	22	1559300	20906	775770	20996	0.00017718	0.00985906	0.000294944	3	0.00344373	0.00453658	39458	37523	21381	0.000316854	0.000433856	0.000301625	3	0.000350778	5.90726e-05
P161_RS0102800	P161_RS0102800	545	SPOR domain-containing protein			4	4	4	0	0	0	0	0	0	1	3	3	16.8	33.671	8602400	0	0	0	0	0	0	2534700	2146600	3921100	16	153250	0	0	0	0	0	0	0	0	0	0	0	0	0	0	0	0	0	0
P161_RS0102805	P161_RS0102805	546	acyl-CoA thioesterase			7	7	7	2	5	3	3	4	4	4	4	1	50.6	18.706	210650000	18726000	17714000	9172300	20039000	19339000	8076400	51992000	58015000	7576400	9	16275000	2080600	1373800	1019100	0.0176333	0.0174593	0.0143159	3	0.0164695	0.00152446	1439800	1385600	631120	0.0115618	0.0160208	0.00890332	3	0.012162	0.00293655
P161_RS0102810	P161_RS0102810	547	mechanosensitive ion channel			4	4	4	2	0	1	0	2	1	2	2	1	27.7	19.11	7680100	1073400	0	674130	0	228390	585560	657400	3860900	600320	8	282810	134180	0	84267	0.00113719	0	0.00118375	2	0.00116047	0.00054738	0	6346.3	73194	0	7.33784e-05	0.00103256	2	0.000552969	0.000470413
P161_RS0102815	P161_RS0102815	548	mechanosensitive ion channel			8	8	8	2	3	1	3	4	5	2	4	2	17.5	36.164	84369000	3821600	3281300	1526400	8623900	1027600	5418600	15459000	30486000	14725000	12	3688500	256060	242430	127200	0.00217013	0.00308098	0.00178686	3	0.00234599	0.000542761	415150	27654	252290	0.00333372	0.000319746	0.0035591	3	0.00240419	0.00147679
P161_RS0102820	P161_RS0102820	549	ATP-binding protein			49	49	49	33	30	24	33	30	31	21	37	32	48.1	115.74	802320000	86707000	36055000	25978000	91123000	46825000	71348000	130010000	146200000	168080000	51	12287000	1298800	640270	461160	0.0110074	0.00813703	0.0064782	3	0.00854089	0.00187098	1309000	853270	962010	0.0105115	0.00986584	0.0135712	3	0.0113162	0.0016162
P161_RS0102825	P161_RS0102825	550	type 1 glutamine amidotransferase			19	19	19	6	4	4	9	10	7	15	14	11	91.4	20.434	807710000	8268600	4936100	4058500	64292000	61363000	15120000	272420000	213040000	164220000	10	28213000	262590	183260	215120	0.00222547	0.002329	0.00302192	3	0.00252547	0.000353582	2585300	2687200	1099600	0.0207604	0.0310705	0.0155122	3	0.0224477	0.0064627
P161_RS0102830	P161_RS0102830	551	peptidoglycan DD-metalloendopeptidase family protein			27	27	27	15	10	8	12	15	18	10	14	9	52.7	45.489	228660000	25046000	13016000	3436400	33775000	12195000	44267000	42025000	35984000	18920000	19	7220900	743660	424730	124710	0.00630259	0.00539778	0.00175188	3	0.00448408	0.00196696	1151300	462770	1218800	0.00924512	0.00535073	0.0171938	3	0.0105966	0.00492845
P161_RS0102835	P161_RS0102835	552	DUF4292 domain-containing protein			18	18	18	11	10	11	12	13	9	14	14	11	52	29.516	592090000	64643000	36566000	19631000	65673000	25760000	20188000	214660000	67247000	77727000	17	17204000	1548700	1639100	828220	0.0131254	0.0208309	0.0116345	3	0.0151969	0.00403004	1625700	1219700	973250	0.0130546	0.0141026	0.0137298	3	0.013629	0.000433746
P161_RS0102840	P161_RS0102840	553	hypothetical protein			3	3	3	1	0	1	0	0	0	0	3	0	11.7	38.183	7091500	2022000	0	3459900	0	0	0	0	1609600	0	13	545500	155540	0	266150	0.00131822	0	0.00373877	2	0.00252849	0.0015483	0	0	0	0	0	0	0	0	0
P161_RS0102845	P161_RS0102845	554	nucleotidyltransferase			29	29	29	15	17	14	21	17	19	24	20	19	95.3	36.708	4.2241e+09	269380000	171340000	138040000	577850000	167420000	194990000	1233600000	836880000	634530000	19	54960000	4592200	3394200	2939600	0.0389193	0.043136	0.0412944	3	0.0411166	0.00172604	6660700	2453900	2986700	0.0534865	0.028373	0.0421339	3	0.0413311	0.0102683
P161_RS0102850	P161_RS0102850	555	ABC-F family ATP-binding cassette domain-containing protein			35	35	35	17	19	21	21	20	14	15	21	15	47.8	71.637	561210000	38552000	32365000	44203000	49948000	31832000	27110000	162040000	109170000	65989000	32	11417000	1001000	734620	1013100	0.00848357	0.0093361	0.0142316	3	0.0106838	0.00253275	1068400	674860	714880	0.00857942	0.007803	0.0100849	3	0.00882245	0.000947316
P161_RS17935	P161_RS17935	556	hypothetical protein			9	9	9	5	3	2	1	3	2	4	3	1	63.4	14.252	26430000	7722000	1103200	653970	1184900	2945000	272160	5952800	4750500	1845400	8	2475400	706930	137900	81746	0.0059913	0.00175254	0.00114834	3	0.00296406	0.00215475	148110	261920	34020	0.00118935	0.00302842	0.000479926	3	0.0015659	0.00107395
P161_RS0102860	P161_RS0102860	557	3'-5' exonuclease			9	9	9	4	4	3	1	6	4	6	6	6	37.4	27.966	26072000	1990300	632780	1158100	1050100	2450900	635330	8549600	5321800	4282800	14	1555800	142160	24481	64368	0.00120482	0.000311123	0.000904217	3	0.000806719	0.000371306	75008	142010	26285	0.000602326	0.00164198	0.000370807	3	0.000871703	0.000552805
P161_RS18930	P161_RS18930	558	T9SS type A sorting domain-containing protein			8	8	8	5	5	4	6	7	6	5	4	7	22.1	65.957	853200000	26063000	70485000	17996000	109360000	56772000	72973000	253210000	62198000	184150000	9	41757000	2096800	3246500	1144800	0.0177706	0.0412589	0.0160817	3	0.0250371	0.0114913	6099700	2453000	3299000	0.0489816	0.0283625	0.0465396	3	0.0412946	0.0091985
P161_RS0102870	P161_RS0102870	559	response regulator transcription factor	RR|OmpR		14	14	14	6	7	8	6	7	7	11	8	8	66.8	26.383	470610000	13207000	29755000	18814000	40322000	7648700	37232000	121210000	81640000	120780000	12	9764900	161820	979870	616270	0.00137144	0.0124529	0.00865712	3	0.00749383	0.00459817	224800	205620	518410	0.00180518	0.00237746	0.0073133	3	0.00383198	0.00247273
P161_RS0102875	P161_RS0102875	560	two-component sensor histidine kinase	HK|Classic		8	8	8	5	2	5	6	5	4	8	6	5	22.5	40.09	96009000	4917000	850730	4638600	14502000	1736600	2662300	40453000	18121000	8128200	15	4189800	327800	38547	237010	0.00277814	0.000489884	0.00332942	3	0.00219915	0.00122941	671130	110030	177490	0.00538928	0.00127221	0.00250388	3	0.00305512	0.00172539
P161_RS0102880	P161_RS0102880	561	phosphoribosylamine--glycine ligase			35	35	35	23	21	15	18	23	22	18	15	18	78.5	46.29	1.6411e+09	192980000	54763000	24724000	278080000	46040000	158530000	439040000	162190000	284780000	27	13361000	1919300	651620	479890	0.0162662	0.00828127	0.00674131	3	0.0104296	0.00417473	1783400	728590	1966800	0.014321	0.00842424	0.027746	3	0.0168304	0.00808519
P161_RS0102885	P161_RS0102885	562	glycosyltransferase family 2 protein	CAZyme, single-domain, contains GT2 domain *		4	4	4	2	2	3	0	2	2	3	2	2	19.6	28.901	17319000	2148600	1060600	1658700	0	1001700	798450	6182300	1723000	2745800	12	1362100	179050	88387	138230	0.00151747	0.00112329	0.0019418	3	0.00152752	0.000334232	0	83472	12214	0	0.000965136	0.000172305	2	0.00056872	0.000420285
P161_RS0102890	P161_RS0102890	563	exopolysaccharide biosynthesis polyprenyl glycosylphosphotransferase			8	8	8	1	0	1	3	3	0	2	4	0	21.5	53.239	15629000	1010400	0	339660	4606900	870730	0	2117400	6684200	0	24	292190	42101	0	14153	0.00035681	0	0.000198816	2	0.000277813	0.000145984	72740	9508.1	0	0.000584114	0.000109936	0	2	0.000347025	0.000253447
P161_RS0102895	P161_RS0102895	564	glycosyltransferase	CAZyme, single-domain, contains GT2 domain		8	8	8	6	3	3	2	4	4	5	5	4	24.2	29.784	26204000	2705400	3123000	1972700	2159600	2093900	2096000	5146900	3192300	3714200	14	1833300	193250	223070	140910	0.00163781	0.00283494	0.00197945	3	0.00215073	0.000503509	154260	149560	149710	0.00123873	0.00172927	0.00211198	3	0.00169333	0.000357409
P161_RS0102900	P161_RS0102900	565	hypothetical protein			3	3	3	0	0	0	1	0	2	1	2	1	7.2	66.124	7482500	0	0	0	59925	0	833010	77575	5548600	963400	25	110750	0	0	0	0	0	0	0	0	0	2397	0	33321	1.92483e-05	0	0.000470065	2	0.000244657	0.000217196
P161_RS0102905	P161_RS0102905	566	glycosyltransferase	CAZyme, single-domain, contains GT94 domain		13	13	13	2	2	2	5	4	4	6	4	0	41.4	40.94	19039000	687260	485230	241560	1434500	1465700	1102000	8196900	5425900	0	21	534620	21569	14549	11503	0.000182799	0.0001849	0.00016159	3	0.000176429	1.05283e-05	57136	54238	42365	0.000458811	0.000627121	0.00059765	3	0.000561194	7.33887e-05
P161_RS17945	P161_RS17945	568	glycosyltransferase	CAZyme, single-domain, contains GT2 domain		8	8	8	2	1	3	4	6	3	5	5	6	24.5	30.275	32708000	0	0	0	3381400	2642100	777670	9379500	9026200	7501600	12	2505900	0	0	0	0	0	0	0	0	0	281780	220170	64806	0.00226274	0.00254569	0.000914229	3	0.00190755	0.000711821
P161_RS0102930	P161_RS0102930	571	dTDP-4-dehydrorhamnose 3,5-epimerase			6	6	6	3	2	2	2	2	2	3	2	1	34.4	21.542	42577000	4066700	2291600	461430	2316400	0	751820	12180000	11075000	9434400	10	3490300	406670	86326	46143	0.00344657	0.00109709	0.000648199	3	0.00173062	0.00122712	231640	0	75182	0.00186011	0	0.00106061	2	0.00146036	0.000761875
P161_RS0102935	P161_RS0102935	572	glucose-1-phosphate thymidylyltransferase RfbA			16	16	16	4	9	6	8	10	8	9	8	9	55.1	31.64	199240000	3362200	6282700	9059600	32200000	11072000	12908000	62768000	31778000	29807000	14	8172600	240160	406700	366170	0.00203538	0.00516865	0.00514381	3	0.00411595	0.00147122	1431700	641280	489980	0.0114968	0.00741473	0.00691223	3	0.00860791	0.00205301
P161_RS0102940	P161_RS0102940	573	dTDP-glucose 4,6-dehydratase			16	16	16	8	8	9	10	12	10	12	10	8	53.4	38.204	176600000	11376000	7999400	14614000	15133000	11647000	11987000	45192000	33283000	25374000	22	6365100	517070	363610	618270	0.00438222	0.00462103	0.00868522	3	0.00589615	0.00197457	605320	455300	431970	0.00486082	0.00526436	0.00609388	3	0.00540635	0.00051331
P161_RS0102945	P161_RS0102945	574	hypothetical protein			33	33	33	16	17	14	23	22	23	25	22	22	61.4	39.865	1445200000	85317000	76618000	73073000	128100000	94127000	59009000	374670000	377210000	177100000	22	29691000	2189400	1588800	1068800	0.0185554	0.0201917	0.0150141	3	0.0179204	0.0021609	3347300	2326600	1727000	0.0268793	0.0269011	0.0243631	3	0.0260478	0.00119133
P161_RS0102950	P161_RS0102950	575	hypothetical protein			37	37	37	24	21	24	26	21	23	24	22	23	59.6	63.946	1.8645e+09	145750000	48126000	152900000	138150000	72830000	100330000	403930000	321670000	480810000	32	13881000	1210400	587250	950840	0.0102583	0.00746321	0.013357	3	0.0103595	0.00240721	1929900	721210	664410	0.0154974	0.00833891	0.00937295	3	0.0110698	0.00315915
P161_RS0102955	P161_RS0102955	576	S41 family peptidase			8	8	8	1	1	0	0	1	1	2	6	2	21	61.834	25755000	589670	1389900	0	0	469060	63108	4710700	14715000	3817600	24	515710	24570	57912	0	0.000208233	0.000735989	0	2	0.000472111	0.000309761	0	19544	2629.5	0	0.000225975	3.70948e-05	2	0.000131535	9.89482e-05
P161_RS0102960	P161_RS0102960	577	ribonuclease P protein component			3	3	3	1	1	1	2	3	1	1	1	1	35.2	15.408	27326000	1637300	1218100	998680	3843100	3615000	127480	3543200	7296500	5046800	4	496250	409340	304530	249670	0.00346919	0.00387019	0.00350727	3	0.00361555	0.000180729	113520	350860	31871	0.000911584	0.00405678	0.00044961	3	0.00180599	0.00160268
P161_RS0102965	P161_RS0102965	578	acyl-CoA dehydrogenase			36	36	36	29	28	25	32	27	30	31	29	30	76	43.461	5615600000	402550000	269220000	154220000	960090000	244660000	576730000	1081500000	1.0421e+09	884450000	18	142540000	11445000	6275300	4676200	0.0969974	0.0797512	0.0656894	3	0.0808127	0.0128035	25043000	8647500	13487000	0.201099	0.0999858	0.190263	3	0.163783	0.0453277
P161_RS0102970	P161_RS0102970	579	SGNH/GDSL hydrolase family protein	*		7	7	7	1	5	2	1	3	0	3	4	3	44.8	26.917	30727000	1405500	6781100	1790400	1158700	834050	0	9730100	6175100	2852400	11	914980	127770	276190	66083	0.00108286	0.00351003	0.000928308	3	0.0018404	0.00118229	105340	17216	0	0.000845897	0.000199058	0	2	0.000522477	0.000361104
P161_RS0102975	P161_RS0102975	580	hypothetical protein			2	2	2	1	2	1	2	1	1	2	2	2	8.1	17.841	45154000	3289500	1797600	1618300	5479200	3303500	1498300	8066300	12404000	7697200	4	11288000	822370	449410	404570	0.00696966	0.00571144	0.00568324	3	0.00612145	0.000599889	1369800	825880	374570	0.0109997	0.00954915	0.00528412	3	0.00861099	0.00242584
P161_RS0103010	P161_RS0103010	586	MBL fold metallo-hydrolase			19	19	19	12	7	8	10	8	8	11	11	10	51.9	49.817	471380000	26183000	8086100	29366000	30717000	16313000	14699000	93439000	86150000	166430000	23	7107200	504840	182170	597350	0.00427857	0.00231515	0.00839134	3	0.00499502	0.0025318	414460	299330	263930	0.00332818	0.00346097	0.00372331	3	0.00350415	0.000164174
P161_RS0103015	P161_RS0103015	587	methyltransferase domain-containing protein			2	2	2	0	0	0	0	2	1	0	1	0	13.5	22.449	1664700	0	0	0	0	178830	151030	0	1334900	0	11	13730	0	0	0	0	0	0	0	0	0	0	16257	13730	0	0.00018797	0.000193691	2	0.000190831	8.99887e-05
P161_RS0103020	P161_RS0103020	588	thioredoxin			3	3	3	1	0	0	2	1	1	2	0	1	32.3	11.137	5531400	484800	0	0	991580	354150	80973	3619900	0	0	6	320160	80800	0	0	0.000684787	0	0	1	0	0	35677	59024	13496	0.000286492	0.000682459	0.00019039	3	0.000386447	0.000212957
P161_RS0103030	P161_RS0103030	590	rhodanese-like domain-containing protein			2	2	2	0	0	0	1	0	1	1	0	1	15.5	12.437	1460500	0	0	0	562490	0	154210	743810	0	0	6	119450	0	0	0	0	0	0	0	0	0	93748	0	25702	0.000752811	0	0.000362583	2	0.000557697	0.000307403
P161_RS0103035	P161_RS0103035	591	Crp/Fnr family transcriptional regulator	OCS|Crp		8	8	8	4	4	4	5	5	3	5	7	6	43.3	24.349	74095000	3916900	2781200	2214000	3398800	7201300	2336600	22945000	16173000	13128000	11	3383400	255320	129590	109640	0.00216386	0.00164693	0.00154018	3	0.00178366	0.000272355	93212	228560	18223	0.000748507	0.0026427	0.000257075	3	0.00121609	0.00102852
P161_RS0103045	P161_RS0103045	592	TolC family protein			27	27	27	19	14	16	20	15	14	12	19	14	58	50.561	977500000	98340000	57196000	104250000	88009000	60931000	61026000	163280000	124480000	219990000	28	31438000	3249800	1836900	3041100	0.0275424	0.0233447	0.0427202	3	0.0312024	0.00832264	3000500	2027100	2109200	0.0240945	0.0234381	0.0297548	3	0.0257625	0.00283571
P161_RS0103050	P161_RS0103050	593	efflux RND transporter permease subunit			51	51	51	34	38	36	29	27	31	27	32	37	46.2	117.67	592780000	63401000	48627000	42984000	51998000	21021000	44931000	89394000	89896000	140520000	46	8093100	869650	764720	665620	0.00737036	0.00971863	0.00935037	3	0.00881312	0.0010312	674080	341570	599920	0.00541297	0.00394937	0.00846317	3	0.00594184	0.00188032
P161_RS0103055	P161_RS0103055	594	Bro-N domain-containing protein			16	16	16	7	9	6	6	7	8	9	10	13	43.7	32.241	251410000	23613000	23449000	12362000	18103000	7502400	13633000	53427000	43880000	55442000	12	18984000	1967800	1888900	1030200	0.0166773	0.0240055	0.0144718	3	0.0183849	0.00407511	1431400	609120	1136100	0.0114944	0.00704288	0.0160272	3	0.0115215	0.00366786
P161_RS0103060	P161_RS0103060	595	HlyD family efflux transporter periplasmic adaptor subunit			28	28	28	17	17	19	20	19	16	19	19	19	66.6	41.299	1.6266e+09	136470000	113720000	132400000	146840000	64540000	31010000	486470000	331540000	183600000	19	40223000	3104000	2537400	3356200	0.0263067	0.0322472	0.0471466	3	0.0352335	0.00876599	3043200	1914500	1127900	0.0244374	0.0221362	0.0159115	3	0.0208284	0.00360144
P161_RS0103065	P161_RS0103065	596	hypothetical protein			3	3	3	1	1	1	3	0	0	0	2	0	5	46.194	17675000	3565200	522380	495220	4310500	0	0	0	8781500	0	21	816840	169770	24875	23582	0.00143882	0.00031613	0.000331271	3	0.000695406	0.000525707	180450	0	0	0.00144904	0	0	1	0	0
P161_RS0103070	P161_RS0103070	597	acyl-CoA thioesterase II			17	17	17	11	12	11	9	11	13	11	11	11	46.2	32.768	503050000	30747000	38026000	21471000	87850000	19344000	73748000	87874000	72781000	71206000	16	18186000	1074500	1337300	815060	0.00910649	0.0169954	0.0114496	3	0.0125172	0.00330792	3862400	963190	3581400	0.0310157	0.0111368	0.0505234	3	0.030892	0.0160798
P161_RS0103075	P161_RS0103075	598	SdpI family protein			2	2	2	1	1	1	1	1	0	1	0	2	10.4	13.298	2923800	647790	0	258640	526330	462910	0	708280	0	319890	2	1461900	323890	0	129320	0.002745	0	0.00181664	2	0.00228082	0.00114003	263160	231460	0	0.00211322	0.00267623	0	2	0.00239472	0.00115205
P161_RS0103090	P161_RS0103090	601	TonB-dependent receptor	SusC-like		48	48	48	30	32	35	39	38	37	23	33	32	62.8	93.306	2258300000	235810000	161320000	118880000	353120000	215960000	230050000	368540000	283110000	291510000	45	35649000	3553400	2454400	2104100	0.0301154	0.0311923	0.0295576	3	0.0302884	0.000678513	5977600	3763100	3454700	0.0480011	0.0435104	0.048736	3	0.0467492	0.00230972
P161_RS0103095	P161_RS0103095	602	DNA repair protein RecO			7	7	7	3	1	0	1	4	2	4	4	4	28.8	27.544	14249000	330100	120840	0	600410	969960	382080	3531500	4651600	3662300	17	766950	19418	7108.2	0	0.000164569	9.03363e-05	0	2	0.000127453	6.72923e-05	35318	57057	15824	0.000283609	0.000659715	0.000223232	3	0.000388852	0.000193109
P161_RS0103100	P161_RS0103100	603	hypothetical protein			25	25	25	11	15	4	13	17	13	14	17	12	54.4	86.272	359490000	18903000	26669000	2407500	30794000	22573000	46845000	84414000	68176000	58709000	28	5490900	425540	339100	85983	0.00360649	0.00430953	0.00120786	3	0.00304129	0.00132783	631180	353210	508010	0.00506848	0.00408395	0.00716658	3	0.00543967	0.00128556
P161_RS0103105	P161_RS0103105	604	methyltransferase domain-containing protein			12	12	12	0	1	1	4	6	5	6	9	6	44.6	38.073	91809000	0	228980	819430	8778300	11195000	6109700	30283000	20101000	14294000	19	3767600	0	12052	43128	0	0.000153166	0.000605845	2	0.000379506	0.000257213	443260	580210	313740	0.00355945	0.00670861	0.00442598	3	0.00489802	0.00132826
P161_RS0103110	P161_RS0103110	605	CYTH domain-containing protein			2	2	2	1	0	1	2	2	2	1	1	0	15.4	18.188	10050000	932280	0	377570	1117200	1729700	667830	2453600	2772300	0	6	1446100	155380	0	62929	0.00131686	0	0.000884002	2	0.00110043	0.000548021	111020	156200	89592	0.000891508	0.00180605	0.00126389	3	0.00132048	0.000375497
P161_RS0103120	P161_RS0103120	607	1-acyl-sn-glycerol-3-phosphate acyltransferase			2	2	2	2	1	0	0	1	0	0	0	1	7.2	31.07	1688400	457010	247970	0	0	225060	0	0	0	758390	14	120600	32644	17712	0	0.000276661	0.000225097	0	2	0.000250879	0.000120124	0	16076	0	0	0.000185877	0	1	0	0
P161_RS0103125	P161_RS0103125	608	tryptophan--tRNA ligase			24	24	24	19	17	16	13	16	15	17	18	15	67.4	36.195	1.624e+09	104720000	98559000	122130000	150740000	56585000	76044000	396270000	378540000	240390000	16	45650000	3458300	3250500	3532100	0.0293094	0.0413098	0.0496176	3	0.0400789	0.00833633	4061000	1763900	2721100	0.0326105	0.0203949	0.038387	3	0.0304641	0.00750041
P161_RS0103135	P161_RS0103135	610	T9SS type A sorting domain-containing protein	*		47	38	30	9	9	5	16	14	9	22	28	24	35.9	353.4	194260000	6035100	3636800	1870500	18460000	19500000	4895500	45257000	53288000	41313000	54	2441700	83211	63151	33154	0.000705221	0.00080257	0.000465734	3	0.000657842	0.000141535	245470	262620	84173	0.00197116	0.00303652	0.00118744	3	0.00206504	0.000757794
P161_RS0103140	P161_RS0103140	611	ribosome biogenesis GTPase Der			26	26	26	17	16	14	15	18	17	17	21	18	56.2	49.481	2667800000	210930000	104180000	134180000	389520000	118880000	236680000	459880000	399910000	613610000	18	103040000	9934900	4510100	4307600	0.0841992	0.0573177	0.0605115	3	0.0673428	0.0119904	16382000	4490300	8715000	0.13155	0.0519186	0.122944	3	0.102138	0.0356835
P161_RS0103145	P161_RS0103145	612	hypothetical protein			2	2	2	0	0	0	1	0	1	1	0	0	9	21.099	0	0	0	0	0	0	0	0	0	0	7	0	0	0	0	0	0	0	0	0	0	0	0	0	0	0	0	0	0	0
P161_RS18935	P161_RS18935	614	hypothetical protein			9	9	9	6	4	5	8	9	5	9	9	7	43	32.562	130050000	4188800	3713200	2229300	11149000	6725500	6102100	42504000	32255000	21179000	13	6071700	231280	222300	130370	0.00196012	0.00282515	0.00183139	3	0.00220555	0.000441264	431470	431750	279120	0.00346477	0.00499206	0.00393759	3	0.00413148	0.000638408
P161_RS0103160	P161_RS0103160	615	response regulator transcription factor	RR|NarL		3	3	3	1	1	1	1	1	1	3	1	0	16.1	21.302	66528000	5705000	2595000	1863700	2930100	2355200	2725300	44246000	4108100	0	9	7392100	633890	288340	207080	0.00537228	0.00366444	0.00290898	3	0.0039819	0.00103039	325560	261690	302810	0.0026143	0.00302576	0.00427179	3	0.00330395	0.000704681
P161_RS0103165	P161_RS0103165	616	tandem-95 repeat protein			9	9	9	1	3	1	2	4	3	6	4	4	7	257.57	13331000	888800	1052300	0	298850	1312200	152620	4265000	2211900	3149000	29	155460	30648	31065	0	0.000259745	0.000394797	0	2	0.000327271	0.000163833	2836.2	6703	3380.3	2.27751e-05	7.75027e-05	4.76865e-05	3	4.93214e-05	2.23723e-05
P161_RS0103180	P161_RS0103180	619	GTPase Era			16	16	16	10	10	10	11	12	10	11	11	10	49	33.975	500190000	37526000	29449000	46924000	37973000	17108000	17174000	149520000	111900000	52612000	14	24049000	1965000	1297800	1917000	0.0166536	0.0164934	0.0269293	3	0.0200254	0.0048822	2125800	965670	905680	0.0170705	0.0111655	0.0127766	3	0.0136708	0.00249228
P161_RS0103195	P161_RS0103195	623	DUF58 domain-containing protein			10	10	10	6	4	4	5	5	6	6	3	6	35.9	35.956	39384000	2602900	3237500	2737400	3997200	2225600	3592000	13288000	4107200	3596600	19	1407500	136990	113410	144070	0.001161	0.0014413	0.00202384	3	0.00154205	0.000359383	210380	50813	145880	0.00168938	0.00058752	0.00205795	3	0.00144495	0.000624689
P161_RS0103200	P161_RS0103200	624	peptidase M1			35	35	35	11	17	0	19	23	11	14	16	15	43.1	98.985	144430000	6312200	9155700	0	17126000	16632000	9136900	32911000	26469000	26687000	60	1789700	102290	136900	0	0.000866917	0.00173983	0	2	0.00130337	0.000710283	211090	216540	116390	0.00169509	0.00250372	0.00164193	3	0.00194691	0.000394319
P161_RS0103205	P161_RS0103205	625	thioredoxin			12	12	12	8	7	7	6	8	5	10	6	7	99	11.54	656710000	95716000	51549000	38674000	38371000	61637000	12248000	188650000	105680000	64186000	7	37570000	4727300	4072500	2668800	0.0400643	0.0517564	0.0374903	3	0.0431036	0.00620798	2143200	4908400	169960	0.0172102	0.0567528	0.00239765	3	0.0254536	0.0229432
P161_RS0103210	P161_RS0103210	626	methylenetetrahydrofolate reductase [NAD(P)H]			17	17	17	11	12	12	12	13	15	16	16	13	51.1	35.899	1115200000	54120000	38121000	34266000	95317000	23180000	49589000	278410000	289610000	252620000	19	28756000	1461600	1570700	1331400	0.0123872	0.0199616	0.018703	3	0.0170173	0.00331403	2950700	987620	1381000	0.0236946	0.0114192	0.019482	3	0.0181986	0.00509289
P161_RS18945	P161_RS18945	627	dihydropteroate synthase			81	81	81	51	49	46	57	51	58	50	61	70	72.9	115.88	4781300000	353010000	196800000	135080000	376160000	211830000	318310000	711810000	908370000	1.5699e+09	56	54651000	4557700	2059300	1985500	0.0386269	0.0261711	0.0278915	3	0.0308965	0.00551116	4930200	2593400	3761400	0.0395903	0.0299859	0.0530627	3	0.0408796	0.00946508
P161_RS0103220	P161_RS0103220	628	5-methyltetrahydrofolate--homocysteine methyltransferase			21	21	21	10	9	9	13	13	13	17	18	19	68.3	37.33	2869700000	95141000	53996000	40796000	246360000	72495000	144180000	623810000	899440000	693450000	13	126400000	5742300	3117900	2725700	0.0486665	0.0396246	0.0382896	3	0.0421936	0.00460941	11164000	4583400	7472300	0.0896487	0.0529951	0.105413	3	0.0826856	0.0219587
P161_RS0103225	P161_RS0103225	629	cysteine synthase CysM	CAZyme, single-domain, contains CBM5 domain		38	38	38	23	23	24	26	22	23	30	31	24	89.2	32.6	5158900000	335180000	346560000	271800000	623000000	135610000	319300000	1.0338e+09	963890000	1129800000	16	127420000	11087000	12343000	8595700	0.0939633	0.156864	0.120749	3	0.123859	0.0257731	18417000	5030400	9154900	0.147891	0.0581635	0.12915	3	0.111735	0.0386457
P161_RS0103230	P161_RS0103230	630	serine acetyltransferase			16	16	16	13	12	10	9	13	8	13	14	15	59.2	28.527	537410000	50770000	40723000	23098000	33591000	15444000	16022000	134140000	105370000	118250000	11	23540000	2808000	1906300	950450	0.0237981	0.0242267	0.0133516	3	0.0204588	0.0050286	1250100	807520	964670	0.0100385	0.00933686	0.0136088	3	0.0109947	0.00187048
P161_RS0103240	P161_RS0103240	632	NAD(P)/FAD-dependent oxidoreductase			35	35	26	22	24	19	22	22	22	29	32	30	82.9	38.336	5.9273e+09	266540000	165410000	119220000	391880000	108890000	162050000	1.586e+09	2.0259e+09	1101500000	18	103550000	6675700	4034700	3431300	0.0565772	0.051276	0.0482016	3	0.0520182	0.00345938	9986000	2725100	3339300	0.0801892	0.0315087	0.0471081	3	0.0529353	0.0202964
P161_RS0103245	P161_RS0103245	633	bifunctional precorrin-2 dehydrogenase/sirohydrochlorin ferrochelatase			11	11	11	7	5	3	1	3	0	7	5	5	60	21.995	134080000	5386800	2833300	1028200	0	50682000	0	23248000	23176000	27729000	9	6544400	559540	291110	96442	0.00474215	0.00369964	0.00135478	3	0.00326552	0.00141655	0	63852	0	0	0.000738282	0	1	0	0
P161_RS0103250	P161_RS0103250	634	uroporphyrinogen-III C-methyltransferase			4	4	4	0	0	0	0	0	0	0	1	4	19.6	30.098	6533500	0	0	0	0	0	0	0	555650	5977900	14	406040	0	0	0	0	0	0	0	0	0	0	0	0	0	0	0	0	0	0
P161_RS0103255	P161_RS0103255	635	HEPN domain-containing protein			53	53	53	30	27	25	21	25	22	37	42	36	67.3	79.415	2483000000	157020000	82222000	51722000	67090000	62138000	64428000	848670000	590440000	559280000	38	39817000	2611200	1470800	980060	0.0221302	0.018692	0.0137675	3	0.0181966	0.00343197	1479000	1166600	1176300	0.0118766	0.0134887	0.0165943	3	0.0139865	0.00195788
P161_RS0103260	P161_RS0103260	636	GTP-binding protein			37	37	37	28	27	28	22	26	27	29	32	30	72.6	49.057	5452700000	308580000	132140000	87366000	401370000	100050000	182320000	1138800000	1339400000	1.7626e+09	27	61159000	3649000	1570300	1458400	0.0309256	0.0199565	0.020487	3	0.0237897	0.00505048	4876000	1253700	2553700	0.0391551	0.0144958	0.0360255	3	0.0298921	0.0109616
P161_RS0103270	P161_RS0103270	637	sulfate adenylyltransferase subunit 2			21	21	21	13	12	11	10	10	10	16	19	17	62.5	34.747	1.9188e+09	73314000	82600000	67300000	98247000	45149000	34076000	370860000	593970000	553290000	17	47395000	2195000	2796600	1732700	0.0186028	0.0355413	0.0243403	3	0.0261615	0.00703398	2784400	1611800	1118800	0.0223592	0.0186363	0.0157831	3	0.0189262	0.00269248
P161_RS0103275	P161_RS0103275	638	phosphoadenosine phosphosulfate reductase family protein			25	25	25	16	19	16	17	14	15	19	20	20	91.7	23.533	3.2814e+09	190190000	277890000	139630000	183310000	80038000	144120000	761310000	665580000	839310000	13	85115000	7376600	8100400	5277200	0.0625174	0.102946	0.074132	3	0.0798651	0.0169954	4214000	4253300	3873100	0.0338391	0.0491783	0.0546385	3	0.0458853	0.0088048
P161_RS0103280	P161_RS0103280	639	DUF2061 domain-containing protein			3	3	3	0	1	1	1	0	0	2	2	1	27.6	9.9477	35898000	0	2082300	1351000	0	0	0	21768000	1510200	9186900	5	1974900	0	416460	270190	0	0.00529268	0.00379552	2	0.0045441	0.0022276	0	0	0	0	0	0	0	0	0
P161_RS19445	P161_RS19445	640	hypothetical protein			3	3	3	0	2	0	1	0	1	0	0	0	7.9	46.748	850180	0	482760	0	367430	0	0	0	0	0	19	44747	0	25408	0	0	0.000322904	0	1	0	0	19338	0	0	0.000155287	0	0	1	0	0
P161_RS0103295	P161_RS0103295	641	Rrf2 family transcriptional regulator	TR|Rrf2		9	9	9	4	3	3	5	4	3	4	2	2	66.2	15.145	56659000	3995200	4136200	2477200	12613000	5256700	6759500	11352000	1183700	8884900	11	4776300	325380	376020	225200	0.00275763	0.00477874	0.00316352	3	0.00356663	0.000872964	1104300	298000	602270	0.0088677	0.00344559	0.00849633	3	0.00693654	0.00247313
P161_RS17970	P161_RS17970	642	hypothetical protein	CAZyme, single-domain, contains PL7_5 domain *		15	15	15	15	14	13	3	3	1	3	3	4	54.7	43.926	125380000	49497000	31290000	25146000	2041600	1729400	1096100	9243500	1899300	3442200	21	4837800	1960100	1017000	934380	0.016612	0.0129248	0.0131258	3	0.0142209	0.00169279	97221	82353	52197	0.0007807	0.000952198	0.000736352	3	0.000823083	9.30755e-05
P161_RS0103305	P161_RS0103305	643	aminotransferase class I/II-fold pyridoxal phosphate-dependent enzyme			25	25	25	17	13	13	14	19	18	20	18	18	65.8	43.422	2435800000	132740000	84621000	51353000	274500000	81524000	112740000	660700000	631100000	406540000	21	48515000	2722700	1969200	1229600	0.0230751	0.0250261	0.0172729	3	0.0217914	0.00329279	4902200	2884400	2910100	0.0393654	0.0333506	0.0410533	3	0.0379231	0.00330588
P161_RS0103310	P161_RS0103310	644	bifunctional aspartate kinase/homoserine dehydrogenase I			68	68	68	42	48	41	57	57	48	57	61	61	53.8	126.11	8796500000	330790000	194620000	98342000	467460000	259850000	351930000	2304300000	1.8596e+09	2.9296e+09	54	71737000	3105900	2002300	1012200	0.0263228	0.0254467	0.014219	3	0.0219962	0.00551091	4585300	2657200	3565500	0.0368207	0.0307236	0.0502991	3	0.0392811	0.00817887
P161_RS0103315	P161_RS0103315	645	O-acetylhomoserine aminocarboxypropyltransferase/cysteine synthase			42	42	42	32	28	28	32	27	33	39	41	39	97.9	45.266	107040000000	1456000000	1.018e+09	686160000	8.5151e+09	1.5173e+09	2772400000	29878000000	22999000000	38201000000	24	1.4801e+09	24136000	15609000	14040000	0.204555	0.198371	0.197228	3	0.200051	0.0032184	79678000	24409000	55743000	0.639827	0.282226	0.786376	3	0.569476	0.211745
P161_RS0103320	P161_RS0103320	646	methionine adenosyltransferase			31	31	31	23	18	21	21	18	17	25	21	24	80.7	47.168	6.6364e+09	433530000	217500000	1153100000	454400000	325280000	123700000	1.4901e+09	813160000	1.6256e+09	21	137680000	10444000	7179600	29121000	0.0885139	0.0912437	0.40908	3	0.196279	0.150477	12294000	11141000	2961600	0.0987228	0.128817	0.0417798	3	0.0897731	0.0360918
P161_RS0103325	P161_RS0103325	647	zinc-dependent metalloprotease			66	66	66	56	51	49	47	50	47	49	56	53	64.3	94.187	11582000000	1385300000	787870000	717370000	908780000	656060000	649120000	2724800000	1.8321e+09	1.9201e+09	39	188250000	23828000	12815000	12685000	0.201944	0.162863	0.178194	3	0.181	0.0160781	16049000	11541000	11090000	0.128876	0.133442	0.156449	3	0.139589	0.0120665
P161_RS0103330	P161_RS0103330	648	carboxypeptidase-like regulatory domain-containing protein			5	5	5	1	2	2	1	1	0	0	1	1	12.9	62.874	12054000	289440	1087500	1583100	220970	251190	0	0	2519600	6101900	33	66587	8770.8	32956	10553	7.43333e-05	0.000418829	0.000148244	3	0.000213802	0.000148083	6696.1	7611.8	0	5.37707e-05	8.80106e-05	0	2	7.08907e-05	3.62239e-05
P161_RS0103335	P161_RS0103335	649	tRNA-dihydrouridine synthase family protein			8	8	8	2	3	0	2	5	3	4	1	1	32.8	36.629	13283000	473040	691440	0	0	1232600	3556300	2888700	459430	3981300	19	199200	24897	36392	0	0.000211004	0.000462497	0	2	0.00033675	0.000189054	0	47794	43286	0	0.000552613	0.000610643	2	0.000581628	0.000275204
P161_RS0103340	P161_RS0103340	650	hypothetical protein			3	3	3	2	1	2	1	1	2	1	2	1	19.9	15.913	5487900	1068900	0	69505	189420	592300	221530	1112800	1577100	656370	8	685990	133620	0	8688.1	0.00113244	0	0.000122047	2	0.000627244	0.000507523	23677	74037	27692	0.00019013	0.000856045	0.000390656	3	0.000478944	0.000278934
P161_RS0103345	P161_RS0103345	651	hypothetical protein			6	6	6	4	3	3	4	3	6	5	2	3	36.4	18.036	85690000	6187200	4036100	2284700	7022700	7131700	3767800	28953000	15857000	10449000	11	5618300	308550	255030	130660	0.00261499	0.00324111	0.00183546	3	0.00256385	0.000574992	502040	399410	227430	0.00403146	0.00461813	0.00320839	3	0.00395266	0.000578215
P161_RS0103350	P161_RS0103350	652	endonuclease/exonuclease/phosphatase			17	17	17	10	11	11	10	6	8	13	10	10	51.4	37.909	200590000	13635000	13149000	15737000	18267000	8012500	7935800	53425000	45984000	24445000	18	8822900	665560	622260	781670	0.00564068	0.00790814	0.0109806	3	0.00817647	0.00218825	856650	445140	440880	0.00687904	0.00514688	0.00621957	3	0.00608183	0.000713824
P161_RS17975	P161_RS17975	653	mechanosensitive ion channel family protein			22	22	22	13	10	15	15	12	8	14	16	15	38.8	62.454	734840000	52566000	22621000	67989000	46835000	43234000	17954000	130420000	114040000	239170000	31	18349000	1624500	697600	1400700	0.0137678	0.00886562	0.0196765	3	0.0141033	0.00441989	1218400	1268700	549960	0.00978394	0.0146692	0.00775838	3	0.0107372	0.00290073
P161_RS0103370	P161_RS0103370	656	gamma carbonic anhydrase family protein			12	12	12	7	3	5	5	5	6	6	9	9	50.3	18.505	119280000	8171600	1998000	2731800	9177300	7108500	5707200	15837000	49541000	19010000	7	7014000	471340	188500	148430	0.00399465	0.0023956	0.00208509	3	0.00282511	0.000836648	800470	410610	319490	0.0064279	0.00474763	0.0045071	3	0.00522754	0.000854441
P161_RS0103380	P161_RS0103380	658	response regulator transcription factor	RR|LytTR		12	12	12	8	7	6	4	8	4	11	9	10	42.4	27.832	133400000	7674600	5360800	6032500	7764900	8878400	3958900	35183000	27940000	30602000	14	8442300	496940	355600	430890	0.00421161	0.00451923	0.00605297	3	0.00492794	0.000805372	554640	617900	254240	0.00445385	0.0071444	0.00358661	3	0.00506162	0.00151471
P161_RS0103385	P161_RS0103385	659	hypothetical protein	HK|Classic		31	31	31	9	11	3	18	13	14	16	16	16	38.3	84.512	233100000	4473000	7644900	2501100	48404000	8805600	15889000	73731000	40457000	31190000	42	3770700	93716	141680	15113	0.000794252	0.00180057	0.000212302	3	0.000935709	0.00065608	959630	135160	331420	0.00770598	0.00156277	0.0046754	3	0.00464805	0.00250803
P161_RS0103395	P161_RS0103395	661	SIMPL domain-containing protein			11	11	11	0	0	1	0	0	0	10	10	10	50	26.298	145750000	0	0	6794800	0	0	0	67465000	42538000	28952000	12	8255900	0	0	566240	0	0	0.00795432	1	0	0	0	0	0	0	0	0	0	0	0
P161_RS0103400	P161_RS0103400	662	LysM peptidoglycan-binding domain-containing protein	CAZyme, multi-domain, contains a GH73 and a CBM50 domain		6	6	6	1	1	0	0	0	1	2	4	4	23	32.302	46848000	10287000	1338000	0	0	0	5904500	1673600	23515000	4130500	15	2666400	685770	89201	0	0.00581196	0.00113363	0	2	0.0034728	0.00251553	0	0	393630	0	0	0.00555301	1	0	0
P161_RS0103405	P161_RS0103405	663	pyridoxal-phosphate dependent enzyme			13	13	13	6	4	3	5	6	6	11	6	2	48.5	34.728	125120000	7239100	3759800	2525300	9281800	4335100	32206000	43437000	22338000	0	18	4981900	335830	151170	62141	0.00284619	0.00192118	0.000872933	3	0.0018801	0.000806103	382490	196360	1789200	0.00307146	0.00227039	0.0252406	3	0.0101941	0.0106445
P161_RS0103425	P161_RS0103425	667	ABC-F family ATP-binding cassette domain-containing protein			37	37	37	20	14	16	20	20	13	27	27	25	69	72.937	424080000	23953000	10069000	17363000	19554000	11333000	19859000	172690000	95508000	53749000	32	4458000	490060	211000	241940	0.0041533	0.00268154	0.00339868	3	0.00341118	0.000600908	344900	144960	490090	0.0027696	0.00167608	0.00691378	3	0.00378649	0.00225594
P161_RS0103430	P161_RS0103430	668	DUF983 domain-containing protein			2	2	2	1	1	1	1	1	2	0	1	1	13.2	14.574	15066000	2078200	1242100	643950	2106600	2544400	432330	0	1430300	4588400	5	3013200	415640	248420	128790	0.00352259	0.00315711	0.00180919	3	0.00282963	0.000736823	421310	508880	86465	0.00338319	0.00588387	0.00121978	3	0.00349561	0.00190577
P161_RS0103445	P161_RS0103445	670	FAD-dependent oxidoreductase			25	25	25	15	10	13	10	12	14	15	11	11	57.8	39.835	337830000	17980000	13617000	16866000	29229000	8070700	8715300	120700000	91839000	30808000	21	8906200	587180	445920	580630	0.0049764	0.00566708	0.00815646	3	0.00626665	0.00136572	550850	277700	241450	0.00442341	0.00321088	0.00340618	3	0.00368016	0.000531576
P161_RS0103455	P161_RS0103455	672	gliding motility protein GldN			27	27	27	23	21	19	21	20	20	21	22	25	78.5	32.926	3.292e+09	259470000	225680000	200330000	355350000	116700000	271090000	706020000	644730000	512600000	19	122770000	9735800	9564500	8338500	0.0825118	0.121553	0.117136	3	0.107067	0.0174564	12801000	4988900	7506700	0.102794	0.0576836	0.105898	3	0.088792	0.0220334
P161_RS0103460	P161_RS0103460	673	gliding motility protein GldM			51	51	51	33	33	33	37	36	35	36	41	38	85.1	55.049	9531000000	657780000	264410000	598000000	662520000	561340000	466220000	1.6467e+09	1.8884e+09	2785700000	29	135590000	10468000	4882400	10515000	0.0887173	0.0620492	0.147711	3	0.0994924	0.0357915	11271000	9135800	6038000	0.0905079	0.105632	0.0851791	3	0.0937729	0.00866303
P161_RS0103465	P161_RS0103465	674	gliding motility protein GldL			20	20	20	18	18	20	15	20	17	19	19	19	66.7	22.985	5637300000	275270000	485800000	348900000	572420000	399090000	483970000	1.0496e+09	1.0009e+09	1.0214e+09	11	217000000	16474000	19035000	10083000	0.139619	0.241911	0.141642	3	0.174391	0.0477513	18171000	19493000	8660100	0.145916	0.225386	0.12217	3	0.16449	0.0441373
P161_RS0103470	P161_RS0103470	675	gliding motility lipoprotein GldK	*		20	20	20	17	15	18	17	17	15	16	17	18	43.5	52.161	3.1412e+09	249760000	122520000	212150000	277460000	207870000	124830000	576520000	682380000	687710000	22	94996000	8760400	4204500	6853100	0.0742452	0.0534339	0.0962697	3	0.0746496	0.01749	8969700	6589700	4428000	0.0720281	0.0761927	0.0624666	3	0.0702291	0.00574624
P161_RS0103475	P161_RS0103475	676	formimidoylglutamase			29	29	29	14	14	13	15	16	13	19	16	17	68.7	44.192	715850000	90248000	26602000	16562000	85927000	35133000	53295000	149110000	83798000	175180000	22	20069000	2552200	975150	580940	0.0216301	0.0123929	0.00816082	3	0.0140613	0.00562395	2149800	1399000	1986000	0.0172632	0.0161758	0.0280168	3	0.0204853	0.00534409
P161_RS0103480	P161_RS0103480	677	type I DNA topoisomerase			62	62	62	36	41	32	38	40	42	30	45	37	72.1	94.648	2737100000	242640000	141530000	110620000	288980000	169320000	204960000	440770000	533620000	604620000	50	28568000	2766900	1767600	1432000	0.0234497	0.022464	0.0201162	3	0.02201	0.00139827	3263000	2188000	2193500	0.0262024	0.0252985	0.0309441	3	0.0274817	0.00247595
P161_RS0103490	P161_RS0103490	678	beta-glucosidase BglX	CAZyme, single-domain, contains GH3 domain	Laminarin	29	29	29	11	11	6	26	22	16	14	19	18	46.2	84.452	342590000	13195000	24477000	17780000	51886000	38692000	36281000	69214000	61048000	30017000	39	6382200	273650	583330	455890	0.00231921	0.00741339	0.00640417	3	0.00537892	0.00220243	1011500	834810	687990	0.00812251	0.0096524	0.00970559	3	0.00916017	0.000734058
P161_RS0103495	P161_RS0103495	679	endonuclease/exonuclease/phosphatase family protein		Laminarin	12	12	12	6	4	2	7	9	10	6	7	3	41.2	31.923	59554000	8958200	1637200	4700500	9442800	4965300	8907000	6864200	11598000	2481100	20	2569100	419310	81858	235020	0.00355369	0.00104031	0.00330147	3	0.00263182	0.00113007	344780	238090	366180	0.00276864	0.00275289	0.00516576	3	0.00356243	0.00113375
P161_RS0103505	P161_RS0103505	681	RagB/SusD family nutrient uptake outer membrane protein	SusD-like	Laminarin	12	12	12	3	1	0	9	7	10	5	3	4	25.2	61.166	52957000	2257300	221340	0	8711100	5609100	4364300	6026800	5442800	20324000	29	1403700	39030	7632.5	0	0.000330783	9.69995e-05	0	2	0.000213891	0.000138837	242380	193420	107180	0.00194635	0.0022364	0.00151201	3	0.00189825	0.000297681
P161_RS17985	P161_RS17985	682	SusC/RagA family TonB-linked outer membrane protein	SusC-like	Laminarin	28	28	28	5	4	6	19	16	17	9	15	15	36.7	112.83	200360000	5679300	3759600	11108000	34729000	20081000	24811000	21672000	38420000	40095000	49	3051600	46677	68807	215090	0.000395592	0.00087445	0.0030215	3	0.00143051	0.00114186	556330	366120	355950	0.00446742	0.00423322	0.00502145	3	0.00457403	0.000330504
P161_RS0103515	P161_RS0103515	683	hypothetical protein	TR|LuxR	Laminarin	16	16	16	3	1	2	7	7	5	4	8	6	16.1	108.76	48581000	1878500	374220	399870	7363400	5920300	3193300	5732400	15921000	7797500	54	815570	25583	6929.9	7404.9	0.000216818	8.80703e-05	0.000104021	3	0.000136303	5.73039e-05	112850	71806	59135	0.000906203	0.000830249	0.000834228	3	0.000856893	3.49053e-05
P161_RS0103520	P161_RS0103520	684	aquaporin family protein			3	3	3	0	0	1	1	1	2	1	1	2	11	26.078	7743600	0	0	888420	1597100	1714400	843640	0	1866400	833660	4	1935900	0	0	222100	0	0	0.00311997	1	0	0	399270	428600	210910	0.0032062	0.00495564	0.00297534	3	0.0037124	0.000884145
P161_RS0103525	P161_RS0103525	685	glycerol kinase GlpK			27	27	27	18	14	14	19	18	21	15	18	18	62.3	55.101	1118200000	41384000	17038000	43055000	139850000	123650000	55275000	191890000	184750000	321330000	26	27610000	1241100	586320	1275200	0.0105184	0.00745139	0.0179135	3	0.0119611	0.00439128	3880600	3200700	1375100	0.0311618	0.0370077	0.0193988	3	0.0291894	0.00732287
P161_RS0103530	P161_RS0103530	686	sulfatase-like hydrolase/transferase	Sulfatase|S1_40		21	21	21	9	7	10	10	11	11	11	10	11	37.3	55.739	273210000	10112000	3143500	13655000	17895000	28641000	14899000	30971000	65198000	88695000	20	8767900	191070	100050	412460	0.00161934	0.00127151	0.00579408	3	0.00289497	0.00205489	560950	1010100	443990	0.00450452	0.0116792	0.00626344	3	0.00748238	0.00305322
P161_RS0103540	P161_RS0103540	687	tRNA (N6-isopentenyl adenosine(37)-C2)-methylthiotransferase MiaB			6	6	6	1	0	0	1	0	1	2	3	4	17.4	55.18	51060000	937020	0	0	618500	0	0	9193100	10889000	29423000	26	81336	36039	0	0	0.000305434	0	0	1	0	0	23788	0	0	0.000191021	0	0	1	0	0
P161_RS0103545	P161_RS0103545	688	sigma-54-dependent Fis family transcriptional regulator	ODP|Fis		28	28	28	21	18	21	23	20	14	16	19	18	59.2	46.604	899230000	72554000	21005000	82830000	71263000	42153000	21549000	166290000	161200000	260390000	23	23338000	2286100	765320	2722100	0.0193749	0.00972626	0.038239	3	0.0224467	0.0118412	1610300	1366000	531150	0.012931	0.0157942	0.00749302	3	0.0120727	0.00344286
P161_RS0103550	P161_RS0103550	689	LptE family protein			10	10	10	9	6	6	5	7	6	7	7	6	66.5	18.287	541380000	56723000	24540000	16817000	46096000	43819000	18693000	167450000	104860000	62393000	7	69082000	6705500	2882800	2206300	0.0568297	0.0366368	0.0309932	3	0.0414866	0.0110912	4673900	5451900	2466900	0.0375322	0.063037	0.034801	3	0.0451234	0.0127158
P161_RS0103555	P161_RS0103555	690	hypothetical protein			21	21	21	10	11	12	12	13	8	16	16	14	61.2	29.002	188910000	13035000	14630000	11271000	25387000	5979600	4928100	40979000	27989000	44714000	14	9066500	764430	686910	685290	0.00647861	0.00872976	0.00962669	3	0.00827835	0.00132424	1159000	302100	309980	0.00930695	0.003493	0.00437294	3	0.0057243	0.00255866
P161_RS0103560	P161_RS0103560	691	preprotein translocase subunit SecG			2	2	2	2	2	2	1	2	1	2	1	1	34.9	11.409	21206000	6339900	2801300	1296000	232130	2275200	304060	4333100	1415900	2208000	5	2312900	596370	403630	148990	0.00505429	0.00512963	0.00209295	3	0.00409229	0.00141408	46426	284160	60813	0.000372808	0.00328557	0.000857899	3	0.00150543	0.00127423
P161_RS0103565	P161_RS0103565	692	co-chaperone GroES			13	13	13	13	9	11	9	8	9	11	11	11	93.4	9.6531	1.9179e+09	448710000	280620000	179720000	57763000	71584000	24344000	304540000	295610000	255060000	8	192810000	41794000	30982000	19104000	0.354208	0.393742	0.268366	3	0.338772	0.0523357	5941200	7897200	2538900	0.0477088	0.0913105	0.0358167	3	0.0582787	0.0238563
P161_RS0103570	P161_RS0103570	693	chaperonin GroEL			86	86	86	75	75	78	51	45	46	65	67	61	95.8	57.481	45835000000	7.9044e+09	3.3258e+09	10940000000	1210400000	1217300000	639220000	6.9432e+09	5166700000	8.4873e+09	30	432960000	87276000	34649000	95116000	0.739672	0.440345	1.33615	3	0.838723	0.372358	13217000	12229000	7324200	0.106135	0.141396	0.103324	3	0.116952	0.0173232
P161_RS0103575	P161_RS0103575	694	heavy metal transporter			3	3	3	0	0	0	0	2	0	0	2	2	15.7	27.209	2952400	0	0	0	0	422900	0	0	1536200	993300	9	328040	0	0	0	0	0	0	0	0	0	0	46989	0	0	0.000543305	0	1	0	0
P161_RS0103585	P161_RS0103585	696	TonB-dependent receptor plug domain-containing protein	putative SusC-like		6	6	6	1	0	1	4	1	1	1	0	3	11.1	85.434	15770000	175860	0	116290	2139500	307830	275160	846650	0	11909000	32	111780	5495.5	0	3634.2	4.65749e-05	0	5.10518e-05	2	4.88133e-05	2.30833e-05	42044	9619.6	8598.9	0.00033762	0.000111226	0.000121306	3	0.000190051	0.000104428
P161_RS0103595	P161_RS0103595	698	GAF domain-containing protein			7	7	7	4	2	2	3	5	3	5	2	5	43.3	16.947	140610000	31681000	7961000	619810	6491400	19137000	3914800	23860000	19499000	27444000	5	17333000	1899000	1592200	123960	0.0160942	0.0202349	0.00174134	3	0.0126901	0.00792436	1182500	1788800	782970	0.00949566	0.0206828	0.0110455	3	0.0137413	0.00494898
P161_RS0103600	P161_RS0103600	699	bifunctional phosphoribosylaminoimidazolecarboxamide formyltransferase/IMP cyclohydrolase			33	33	33	26	20	24	25	22	21	24	24	26	69.1	55.773	6.9398e+09	585440000	304340000	897370000	614480000	567170000	229330000	1186400000	954760000	1.6006e+09	27	130690000	12845000	6267300	16607000	0.108863	0.0796495	0.233289	3	0.1406	0.0666169	8830400	9538900	4247400	0.0709095	0.110292	0.0599188	3	0.0803736	0.0216264
P161_RS0103605	P161_RS0103605	700	rod shape-determining protein			26	26	26	21	19	19	22	18	18	19	21	20	62.3	37.417	3.7535e+09	237440000	249490000	315450000	312180000	191210000	143190000	1129400000	684330000	490780000	16	103940000	7524500	7107300	8841400	0.0637708	0.0903248	0.124201	3	0.0927654	0.0247306	8879800	5534600	5044900	0.0713062	0.0639932	0.0711693	3	0.0688229	0.00341556
P161_RS0103610	P161_RS0103610	701	rod shape-determining protein MreC			11	11	11	2	5	6	4	6	2	5	7	5	46.4	31.162	63066000	4203600	7993500	5660500	6477900	2247500	1100800	12434000	12506000	10443000	20	2752100	210180	399670	283030	0.00178129	0.0050793	0.0039759	3	0.00361216	0.00137075	323900	91472	55041	0.00260097	0.00105764	0.000776473	3	0.00147836	0.000802061
P161_RS0103620	P161_RS0103620	703	penicillin-binding protein 2			18	18	18	0	0	1	8	5	8	7	13	13	29.4	71.261	60920000	0	0	338720	6469100	2316800	4597300	13436000	19813000	13949000	31	1416300	0	0	10927	0	0	0.000153498	1	0	0	143150	35617	107770	0.00114952	0.000411818	0.00152033	3	0.00102722	0.000460736
P161_RS0103630	P161_RS0103630	705	30S ribosomal protein S20			7	7	7	5	4	4	4	4	4	4	4	5	41	9.462	780190000	87189000	23441000	37298000	116800000	56088000	16623000	193730000	81810000	167210000	1	407550000	51219000	12994000	25431000	0.434086	0.165137	0.357245	3	0.318823	0.113109	40279000	42224000	13830000	0.323447	0.48821	0.195102	3	0.335586	0.119968
P161_RS0103640	P161_RS0103640	707	proline--tRNA ligase			47	47	47	28	27	27	25	24	20	32	31	30	76.8	56.084	2610500000	184000000	60801000	246860000	159010000	132340000	45140000	532740000	459370000	790250000	29	42700000	4207200	1494100	5806400	0.0356564	0.0189881	0.081566	3	0.0454035	0.0264607	2986000	3341300	679050	0.0239781	0.0386334	0.00957948	3	0.0240636	0.0118614
P161_RS18950	P161_RS18950	708	hypothetical protein			7	7	7	4	4	4	7	4	3	3	5	5	15.7	40.847	703440000	39195000	33271000	31548000	102650000	30865000	27146000	161040000	152360000	125370000	13	6755800	501060	363240	345310	0.00424653	0.00461632	0.00485078	3	0.00457121	0.000248738	1258000	347620	405420	0.0101019	0.00401932	0.00571933	3	0.00661353	0.00256245
P161_RS0103660	P161_RS0103660	709	hemin receptor			15	15	15	14	12	13	12	11	9	13	14	14	45.6	52.19	7.5924e+09	730390000	269410000	662380000	741450000	624650000	298320000	1134600000	1.0367e+09	2.0945e+09	9	517750000	44664000	16158000	38146000	0.378532	0.205348	0.53586	3	0.373247	0.134983	51334000	51712000	23114000	0.41222	0.597914	0.326073	3	0.445403	0.113432
P161_RS0103665	P161_RS0103665	710	NifU family protein			22	22	22	11	11	9	16	14	13	17	19	16	80.7	33.372	1136700000	24170000	21261000	31045000	145400000	32318000	89506000	237600000	249520000	305870000	18	22479000	774640	824490	925100	0.00656515	0.0104782	0.0129954	3	0.0100129	0.0026457	3863900	1127900	1855600	0.0310277	0.0130412	0.0261773	3	0.0234154	0.00759822
P161_RS0103670	P161_RS0103670	711	bifunctional demethylmenaquinone methyltransferase/2-methoxy-6-polyprenyl-1,4-benzoquinol methylase UbiE			18	18	18	12	11	13	8	11	9	10	13	15	74.9	26.552	1094800000	142990000	157880000	93852000	29528000	36029000	46392000	111510000	204620000	272030000	12	42258000	4750500	4917300	3717400	0.0402609	0.0624927	0.0522206	3	0.0516581	0.0090848	2369200	2099500	786990	0.0190251	0.0242752	0.0111022	3	0.0181342	0.00541464
P161_RS0103675	P161_RS0103675	712	PorT family protein			10	10	10	8	8	5	5	9	6	7	8	8	55.3	26.936	213160000	20225000	20992000	12324000	25114000	14619000	9824100	35582000	29369000	45115000	12	14162000	1432200	1507500	871080	0.012138	0.0191584	0.0122366	3	0.014511	0.00328646	864400	1121600	614250	0.00694127	0.0129684	0.00866533	3	0.00952499	0.00253453
P161_RS0103680	P161_RS0103680	713	RNA methyltransferase			9	9	9	3	3	4	1	4	4	7	6	7	46.5	27.09	122970000	3907300	3972600	2677800	3011900	4322400	9672400	33190000	34973000	27242000	9	4158200	298260	342050	176200	0.00252778	0.00434703	0.00247519	3	0.00311667	0.000870261	334660	337630	59572	0.00268737	0.00390381	0.000840392	3	0.00247719	0.00125943
P161_RS0103685	P161_RS0103685	714	membrane protein			23	23	23	13	9	9	13	14	14	7	17	11	26.7	95.357	127480000	15984000	4733800	4972000	17342000	7600700	10853000	14169000	29223000	22607000	44	2608500	302010	107590	113000	0.00255956	0.00136733	0.00158738	3	0.00183809	0.000518006	346630	172740	236340	0.00278349	0.00199729	0.00333409	3	0.00270496	0.000548565
P161_RS0103690	P161_RS0103690	715	class II fructose-bisphosphate aldolase			31	31	31	24	25	25	28	24	25	28	29	28	74.9	38.946	27489000000	1.0244e+09	1182000000	1199900000	2646600000	956470000	1113300000	7.3986e+09	7.702e+09	4.2657e+09	19	739740000	30298000	31155000	31505000	0.256778	0.395941	0.44257	3	0.365096	0.0789226	63145000	31907000	34114000	0.507064	0.368921	0.481252	3	0.452413	0.0599704
P161_RS0103695	P161_RS0103695	716	acetyl-CoA carboxylase, carboxyltransferase subunit beta			30	30	30	23	21	15	22	17	21	26	25	22	82.7	32.152	4.1043e+09	175080000	198070000	177710000	571430000	163190000	480470000	871510000	699570000	767290000	13	88088000	5839300	5831700	4991700	0.0494886	0.0741136	0.0701215	3	0.0645745	0.0107912	7499900	5692100	9194500	0.0602254	0.0658143	0.129708	3	0.0852494	0.03152
P161_RS0103700	P161_RS0103700	717	30S ribosomal protein S15			16	16	16	8	9	8	10	8	9	12	10	9	94.4	10.348	3.7283e+09	307680000	182510000	151540000	262960000	258090000	84966000	842390000	1.0227e+09	615440000	5	365430000	39665000	19771000	18349000	0.336165	0.251265	0.25776	3	0.28173	0.0385826	23276000	32625000	10527000	0.18691	0.377223	0.148506	3	0.237546	0.100003
P161_RS0103705	P161_RS0103705	718	polyribonucleotide nucleotidyltransferase			56	56	56	37	38	33	43	40	38	53	43	44	63	82.327	7.1436e+09	502970000	349920000	160550000	727040000	500520000	475030000	1.9776e+09	1177100000	1273000000	34	133320000	10126000	7340600	3777100	0.0858188	0.0932898	0.0530592	3	0.0773893	0.0174722	14994000	11011000	9493400	0.120404	0.127313	0.133925	3	0.127214	0.0055203
P161_RS0103715	P161_RS0103715	720	tyrosine-type recombinase/integrase			8	8	8	1	0	0	3	5	1	3	3	3	18.6	45.024	25941000	0	0	0	1751700	1451500	477500	13413000	6169100	2678400	24	412420	0	0	0	0	0	0	0	0	0	24507	47046	19896	0.000196795	0.000543964	0.000280676	3	0.000340479	0.000147905
P161_RS0103725	P161_RS0103725	722	hypothetical protein			11	11	11	6	3	2	7	6	3	9	6	7	52.6	24.743	140450000	5982300	1077600	1956400	7635400	7551000	2557600	48090000	44275000	21329000	9	9682600	495590	119740	217380	0.00420017	0.00152174	0.00305367	3	0.0029252	0.00109723	542950	573680	284180	0.00435997	0.00663311	0.00400898	3	0.00500069	0.00116316
P161_RS0103735	P161_RS0103735	724	T9SS type A sorting domain-containing protein			7	7	7	4	6	5	5	5	5	6	5	5	22.3	39.003	88834000	11612000	12352000	7985200	8778600	6190300	8748300	14183000	8315500	10669000	9	9666100	1290300	1372400	887250	0.0109354	0.0174415	0.0124637	3	0.0136135	0.00277774	975400	687820	972030	0.00783262	0.00795284	0.0137126	3	0.00983268	0.00274395
P161_RS0103750	P161_RS0103750	727	hypothetical protein			8	8	8	5	6	5	7	6	5	5	7	5	51	17.72	134870000	10459000	6558300	3766200	10331000	14535000	7727200	21983000	44132000	15382000	10	10534000	839100	655830	376620	0.00711145	0.00833477	0.00529061	3	0.00691228	0.00125073	903280	1267600	772720	0.00725348	0.0146565	0.0109009	3	0.010937	0.00302237
P161_RS0103755	P161_RS0103755	728	hypothetical protein			12	12	12	6	2	3	8	7	6	7	3	0	43.3	38.676	45744000	3362700	1188800	2363400	7495300	3414800	2108400	17280000	8530500	0	17	2016100	81919	69932	136300	0.000694271	0.000888748	0.00191469	3	0.0011659	0.000535392	345340	135640	108260	0.00277313	0.00156832	0.00152724	3	0.00195623	0.00057788
P161_RS0103760	P161_RS0103760	729	restriction endonuclease or methylase			26	26	26	14	11	9	17	19	19	16	13	12	76.6	40.754	888330000	51747000	21271000	14672000	169070000	59529000	120980000	203640000	130250000	117170000	19	26013000	1554100	740660	567230	0.0131711	0.00941286	0.00796823	3	0.0101841	0.00219297	4411900	2131400	3359600	0.0354283	0.0246441	0.0473945	3	0.0358223	0.00929198
P161_RS0103790	P161_RS0103790	735	hypothetical protein			49	49	49	37	38	39	45	34	37	45	42	36	76	35.674	22376000000	1.8845e+09	1.8211e+09	1.9608e+09	3.7817e+09	918990000	2250000000	4.1711e+09	3.0651e+09	2522300000	19	665220000	61195000	60213000	61979000	0.518633	0.765232	0.870657	3	0.718174	0.147515	109130000	34999000	59423000	0.876331	0.404672	0.83829	3	0.706431	0.21394
P161_RS0103795	P161_RS0103795	736	TonB-dependent receptor			45	45	45	31	31	31	38	32	34	30	32	29	65.9	78.5	3.2648e+09	271810000	213640000	235770000	400800000	224020000	220700000	766400000	537330000	394300000	40	48706000	4555800	3634900	3978800	0.0386108	0.046195	0.0558926	3	0.0468995	0.00707283	5943700	3231000	3821000	0.0477289	0.0373581	0.0539035	3	0.0463301	0.00682666
P161_RS0103800	P161_RS0103800	737	hypothetical protein			6	6	6	4	4	4	4	4	4	4	6	5	40.9	22.763	678980000	66093000	69811000	33047000	66196000	56909000	17884000	113070000	158890000	97080000	4	84196000	9091300	9417100	4985800	0.0770496	0.11968	0.0700386	3	0.0889226	0.021936	8985500	7278300	1914900	0.072155	0.0841545	0.0270138	3	0.0611078	0.0246008
P161_RS0103805	P161_RS0103805	738	DoxX family membrane protein			5	5	5	5	3	3	4	5	3	4	5	4	24.8	17.176	310320000	33609000	19421000	6961400	41259000	43779000	18310000	53868000	54075000	39040000	4	55339000	6446300	3971900	1674900	0.054633	0.0504779	0.0235283	3	0.0428797	0.0137882	8129300	7179900	3992400	0.0652796	0.0830168	0.0563215	3	0.0682059	0.011093
P161_RS0103810	P161_RS0103810	739	dihydroorotase			21	21	20	6	6	7	13	10	11	4	8	8	47.6	52.118	196840000	7335700	3250100	5095500	21233000	12713000	27750000	35192000	34089000	50183000	28	4563000	200340	98604	145250	0.0016979	0.00125313	0.00204042	3	0.00166382	0.000322309	535510	293990	809110	0.00430023	0.00339923	0.0114143	3	0.00637124	0.00358487
P161_RS0103820	P161_RS0103820	740	SAVED domain-containing protein			23	23	23	13	15	16	16	19	16	20	17	14	59.8	42.983	847780000	26166000	27560000	38160000	94193000	60282000	61703000	226240000	168530000	144930000	17	26569000	1307600	1131700	1546400	0.011082	0.0143825	0.0217232	3	0.0157292	0.0044474	4580100	1961100	934470	0.0367789	0.022675	0.0131827	3	0.0242122	0.00969424
P161_RS18005	P161_RS18005	741	hypothetical protein			18	18	18	10	8	6	11	10	11	11	8	12	34.2	51.711	319230000	15369000	5476900	9492000	38427000	19578000	20877000	62203000	53598000	94205000	25	9075600	473070	219080	366830	0.00400931	0.00278423	0.00515308	3	0.00398221	0.00096727	1173900	734660	721450	0.0094266	0.00849443	0.0101776	3	0.00936622	0.000688486
P161_RS0103830	P161_RS0103830	742	AhpC/TSA family protein			26	26	26	12	11	8	22	17	19	20	15	18	52	43.029	1179200000	27974000	19395000	13277000	261490000	67090000	139610000	272270000	172970000	205120000	20	27873000	809240	775690	522130	0.00685838	0.00985804	0.00733468	3	0.00801704	0.00131623	4864800	2349900	3722000	0.0390651	0.0271705	0.0525069	3	0.0395808	0.01035
P161_RS0103835	P161_RS0103835	743	hypothetical protein			21	21	21	11	13	11	18	15	13	15	14	12	53.8	35.464	339110000	13062000	12248000	15200000	46893000	28751000	15345000	119130000	60719000	27758000	15	14118000	675920	671230	706470	0.00572848	0.00853049	0.00992422	3	0.00806106	0.00174477	1796100	1419700	843790	0.014423	0.0164151	0.0119035	3	0.0142472	0.00184606
P161_RS0103840	P161_RS0103840	744	hypothetical protein			17	17	17	5	6	7	11	12	12	15	10	9	51.3	35.337	182400000	4017500	3163600	8884100	29919000	10718000	19918000	50890000	33281000	21607000	12	8336400	334800	162250	527610	0.00283746	0.00206199	0.00741166	3	0.0041037	0.0023604	1220900	572480	900430	0.00980402	0.00661924	0.0127025	3	0.00970859	0.00248441
P161_RS0103845	P161_RS0103845	745	TlpA family protein disulfide reductase			23	23	22	4	2	2	13	16	15	16	15	12	48.5	58.051	442710000	3864600	277430	767180	35591000	22601000	59842000	100050000	92186000	127530000	32	8193100	120770	8669.6	23974	0.00102354	0.00011018	0.000336777	3	0.000490165	0.000388331	853630	511140	374360	0.00685478	0.00591	0.00528116	3	0.00601532	0.000646731
P161_RS0103850	P161_RS0103850	746	hypothetical protein			2	2	2	1	0	1	1	2	1	1	1	1	14	26.274	38267000	0	0	0	5852200	5435200	2465900	12908000	11280000	325440	8	4783400	0	0	0	0	0	0	0	0	0	731530	679390	308230	0.0058743	0.00785537	0.00434825	3	0.00602598	0.00143579
P161_RS0103860	P161_RS0103860	748	AraC family transcriptional regulator			3	3	3	0	0	0	1	2	2	1	1	2	29.1	17.618	4863900	0	0	0	374720	1383200	564120	652580	865100	1024100	8	204060	0	0	0	0	0	0	0	0	0	46840	172900	22384	0.000376133	0.00199914	0.000315775	3	0.000897015	0.000779708
P161_RS0103870	P161_RS0103870	750	hypothetical protein			6	6	6	1	3	1	4	3	4	2	3	2	76.3	8.3783	67008000	741690	1132900	442340	11603000	11404000	2005300	4670500	27695000	7312400	7	5005100	105960	161850	63191	0.000898021	0.00205691	0.000887683	3	0.00128087	0.000548759	837670	988590	119480	0.00672662	0.0114305	0.00168552	3	0.0066142	0.00397915
P161_RS0103875	P161_RS0103875	751	hypothetical protein			10	10	10	1	1	2	6	7	8	6	5	4	34.6	40.734	62566000	135730	531940	1730300	7437700	5580400	5251300	16558000	11936000	13406000	17	2799800	7984.4	31291	101780	6.76685e-05	0.000397669	0.00142977	3	0.000631701	0.000580176	371250	250730	270420	0.0029812	0.00289904	0.00381486	3	0.0032317	0.00041372
P161_RS0103885	P161_RS0103885	752	helix-turn-helix transcriptional regulator	TR|ArsR		12	12	12	11	9	8	0	1	1	0	1	0	82.9	14.048	190260000	98449000	58734000	31689000	0	886910	289870	0	214870	0	8	14313000	6622200	4182300	3334700	0.0561238	0.0531518	0.0468446	3	0.05204	0.00386892	0	110860	36233	0	0.00128181	0.000511145	2	0.000896476	0.000526858
P161_RS0103890	P161_RS0103890	753	mercuric transport protein MerTP			7	7	7	7	5	5	1	0	1	2	0	0	35.4	21.629	49698000	23881000	15578000	7750300	920850	0	105950	1461900	0	0	8	2993200	1109900	976500	673390	0.0094065	0.0124101	0.00945952	3	0.0104254	0.00140357	115110	0	13244	0.000924352	0	0.000186835	2	0.000555593	0.000399063
P161_RS0103895	P161_RS0103895	754	organomercurial lyase			10	10	10	9	8	8	2	1	2	1	2	3	54	22.864	184170000	82742000	52283000	37936000	627290	196530	290550	1431700	4948800	3717400	6	19911000	9467500	4824300	4268800	0.0802379	0.0613108	0.0599664	3	0.0671717	0.00925549	104550	32755	48424	0.000839553	0.000378726	0.000683126	3	0.000633802	0.000191337
P161_RS0103900	P161_RS0103900	755	mercury(II) reductase			31	31	31	26	27	29	14	13	12	13	16	15	57.5	62.244	1.6797e+09	464900000	255920000	687740000	23344000	24450000	21013000	92567000	79689000	30087000	26	38164000	11506000	6891400	13080000	0.0975144	0.087581	0.183743	3	0.122946	0.0431806	608410	653620	556020	0.00488563	0.00755741	0.00784387	3	0.0067623	0.00133215
P161_RS0103905	P161_RS0103905	756	hypothetical protein			8	8	8	0	0	0	3	5	4	2	2	4	9.9	81.322	14360000	0	0	0	1794000	1788100	771280	6589000	1422000	1995900	36	308600	0	0	0	0	0	0	0	0	0	39801	39600	21425	0.000319608	0.000457871	0.000302246	3	0.000359908	6.96315e-05
P161_RS18010	P161_RS18010	758	hypothetical protein			5	5	5	3	2	4	5	4	4	5	3	3	73.6	8.2474	185920000	11708000	3637100	3780200	19481000	14113000	7572600	38971000	43802000	42852000	3	32702000	2990700	786410	936070	0.0253465	0.00999428	0.0131495	3	0.0161634	0.00661992	3595800	3690200	1702700	0.0288748	0.0426675	0.0240203	3	0.0318542	0.00789884
P161_RS19315	P161_RS19315	759	hypothetical protein			5	5	5	3	3	3	3	5	3	4	4	4	59.1	7.6228	255790000	17181000	7732500	4600100	16270000	24371000	9250100	56565000	84300000	35515000	5	33198000	2058900	1042100	887580	0.0174494	0.0132438	0.0124684	3	0.0143872	0.00218831	2808600	3216200	1177300	0.0225535	0.037187	0.0166084	3	0.0254496	0.00864716
P161_RS0103925	P161_RS0103925	760	hypothetical protein			12	12	12	2	3	3	9	6	8	5	3	2	38.6	30.291	32507000	637180	1247200	394760	6692300	2985700	2994100	10333000	3860400	3362200	14	1271000	45513	89082	28197	0.000385727	0.00113212	0.0003961	3	0.000637983	0.000349434	243450	142890	140720	0.00195494	0.00165215	0.00198516	3	0.00186408	0.000150367
P161_RS0103955	P161_RS0103955	766	hypothetical protein			13	13	13	4	6	5	8	8	10	9	8	10	46.5	34.939	117110000	3743200	5106500	3843400	17359000	5184500	7465300	32802000	20842000	20765000	17	5804900	220190	279900	195920	0.00186613	0.00355718	0.00275221	3	0.00272517	0.000690632	1021100	273900	399000	0.00819959	0.00316694	0.00562876	3	0.0056651	0.00205473
P161_RS0103960	P161_RS0103960	767	hypothetical protein			3	3	3	0	0	0	1	0	1	2	1	1	12.5	25.402	7547400	0	0	0	1129500	0	440850	1040200	606280	4330600	10	754740	0	0	0	0	0	0	0	0	0	112950	0	44085	0.000907006	0	0.000621915	2	0.000764461	0.000378699
P161_RS0103965	P161_RS0103965	768	hypothetical protein			7	7	7	1	1	2	2	2	1	5	2	1	28.5	31.04	13902000	821110	1194100	975290	1238200	1035100	0	5345100	3293200	0	15	685660	54740	79605	65019	0.000463927	0.00101168	0.000913362	3	0.000796323	0.000238442	82544	51447	0	0.000662841	0.00059485	0	2	0.000628846	0.000297737
P161_RS0103980	P161_RS0103980	771	tetratricopeptide repeat protein			2	2	2	1	0	0	0	0	1	1	2	1	6.1	34.415	15879000	1279600	0	0	0	0	5201700	597320	5087900	3713000	16	992470	79974	0	0	0.000677787	0	0	1	0	0	0	0	325110	0	0	0.00458638	1	0	0
P161_RS0103985	P161_RS0103985	772	2-amino-4-hydroxy-6-hydroxymethyldihydropteridine diphosphokinase			18	18	18	7	4	5	7	10	11	12	8	7	53.7	43.513	126840000	8304800	2370800	2053000	23183000	6234700	12660000	38174000	21962000	11893000	23	2763900	254720	103080	58169	0.00215878	0.00131002	0.000817135	3	0.00142864	0.000554108	703670	178560	305600	0.00565058	0.00206458	0.00431115	3	0.00400877	0.00147951
P161_RS0103990	P161_RS0103990	773	gliding motility protein GldC			3	3	3	1	1	1	1	0	0	1	3	1	35.1	12.866	25615000	3878300	636470	0	2209800	0	0	5673500	8750300	4466900	6	4269200	646380	106080	0	0.00547813	0.00134814	0	2	0.00341314	0.00233057	368300	0	0	0.00295751	0	0	1	0	0
P161_RS0103995	P161_RS0103995	774	gliding motility lipoprotein GldB			23	23	23	12	14	13	14	13	15	18	16	14	64.6	37.713	344790000	13626000	14749000	20394000	48017000	15278000	19818000	99427000	79989000	33493000	22	9504400	518760	518800	745470	0.00439654	0.0065933	0.0104721	3	0.00715397	0.00251181	1574300	511980	669270	0.0126419	0.00591971	0.00944151	3	0.00933437	0.00274536
P161_RS0104000	P161_RS0104000	775	NAD(+) synthase			20	20	20	15	15	15	17	18	17	17	17	18	78.2	28.847	1395600000	62996000	80910000	68482000	154180000	50467000	95975000	278420000	337700000	266430000	16	61331000	3126100	4051700	3305500	0.026494	0.051492	0.0464344	3	0.0414735	0.0107915	8180600	2319600	4237700	0.0656915	0.0268201	0.059782	3	0.0507645	0.0171023
P161_RS0104015	P161_RS0104015	776	DNA primase			28	28	28	14	12	6	13	11	12	13	19	13	38.3	77.993	182620000	19413000	9105400	1973500	14047000	7060900	12826000	45028000	44276000	28889000	32	4550900	327240	216620	22774	0.00277339	0.00275297	0.00031992	3	0.00194876	0.00115179	358670	220650	348470	0.00288018	0.00255124	0.00491593	3	0.00344911	0.00104585
P161_RS0104020	P161_RS0104020	777	ATP-dependent Clp protease ATP-binding subunit ClpX			28	28	28	15	17	14	15	14	18	17	12	16	64.4	45.599	1087000000	99167000	48581000	35835000	138350000	64795000	114570000	243090000	168560000	174100000	23	30847000	3111000	1607300	1317200	0.026366	0.0204268	0.0185035	3	0.0217654	0.00334651	3029300	1937300	3602900	0.0243258	0.0223998	0.0508267	3	0.0325174	0.0129705
P161_RS0104025	P161_RS0104025	778	ATP-dependent Clp endopeptidase proteolytic subunit ClpP			15	15	15	11	10	8	9	6	7	13	12	11	62.1	24.687	2457600000	364220000	138050000	55578000	198060000	98337000	46601000	380020000	801600000	375130000	10	61948000	9155000	3931400	3682200	0.0775895	0.0499632	0.0517261	3	0.0597596	0.0126282	4745400	3774400	1857300	0.0381063	0.0436411	0.0262013	3	0.0359829	0.00727639
P161_RS0104030	P161_RS0104030	779	trigger factor			55	55	55	41	37	42	35	35	38	38	36	41	80.5	50.659	6.5095e+09	587960000	199170000	725090000	368250000	304040000	253020000	1104400000	868090000	2.0995e+09	25	107990000	12836000	4931600	11839000	0.108786	0.0626744	0.16631	3	0.11259	0.0423943	7790500	6356600	4966800	0.0625589	0.0734975	0.0700675	3	0.068708	0.00456794
P161_RS0104040	P161_RS0104040	780	sterol desaturase family protein			11	11	11	9	8	7	3	6	2	7	7	7	30.6	35.079	78124000	11152000	11486000	5861500	1514400	2986500	826320	19719000	11244000	13334000	14	3314900	730900	557290	267860	0.00619444	0.00708246	0.00376279	3	0.0056799	0.00140324	108170	132250	42550	0.000868622	0.00152913	0.00060026	3	0.000999336	0.00039031
P161_RS0104045	P161_RS0104045	781	NAD(P)/FAD-dependent oxidoreductase			21	21	21	14	9	11	14	12	14	13	14	15	55.7	38.964	406240000	46339000	20960000	13013000	84719000	21845000	44939000	68057000	39444000	66925000	19	17739000	2167100	1075000	669220	0.0183664	0.0136619	0.00940094	3	0.0138097	0.00366161	3312900	1133200	2144100	0.0266031	0.0131025	0.0302472	3	0.0233176	0.00737478
P161_RS0104050	P161_RS0104050	782	elongation factor 4			38	38	38	24	23	31	30	23	22	26	29	28	56.4	66.939	3.1977e+09	216490000	115160000	309620000	203650000	234650000	93364000	937060000	647740000	440000000	25	61422000	4698600	2361200	5734900	0.0398211	0.0300079	0.0805616	3	0.0501302	0.021888	4570500	4945700	2972200	0.0367018	0.0571841	0.0419293	3	0.0452718	0.00868945
P161_RS0104055	P161_RS0104055	783	PepSY domain-containing protein			2	2	2	2	2	1	1	2	2	1	2	1	6.2	48.89	14188000	1082800	1002300	440540	785560	1159700	636680	1332900	5841700	1905400	13	1091400	83295	77103	33888	0.000705933	0.000979882	0.000476045	3	0.00072062	0.000205953	60428	89204	48976	0.000485246	0.00103141	0.000690913	3	0.000735857	0.000225224
P161_RS0104060	P161_RS0104060	784	heme-binding protein			12	12	12	3	4	2	6	7	2	5	3	3	76.8	22.274	47304000	5087200	1122800	453830	5186700	4588600	758770	22379000	6128700	1598800	11	3032800	418980	25592	41258	0.00355089	0.000325242	0.000579576	3	0.00148524	0.00146433	185880	218550	68979	0.00149265	0.00252696	0.000973099	3	0.00166423	0.000645861
P161_RS0104065	P161_RS0104065	785	EF-hand domain-containing protein			5	5	5	3	3	3	4	4	4	5	4	4	56	10.14	117520000	7105200	4325400	2462500	9242300	8072000	3442500	35560000	27244000	20069000	5	17851000	1151000	865080	393310	0.00975483	0.0109941	0.00552507	3	0.00875799	0.00234134	1604800	1325400	554850	0.0128868	0.0153248	0.00782736	3	0.012013	0.00312255
P161_RS0104070	P161_RS0104070	786	EF-hand domain-containing protein			3	3	3	1	0	1	1	0	0	1	1	1	38	10.756	5023000	730070	0	0	0	0	0	1153200	1898900	1240800	5	624820	146010	0	0	0.00123745	0	0	1	0	0	0	0	0	0	0	0	0	0	0
P161_RS0104075	P161_RS0104075	787	hypothetical protein	*		26	26	26	18	19	13	22	16	18	22	21	18	71.2	41.332	1281800000	68799000	60042000	33933000	101730000	56000000	35612000	367310000	376470000	181870000	20	34646000	2407300	1780500	1248200	0.0204021	0.0226279	0.0175342	3	0.0201881	0.00208499	2721800	1847300	1284200	0.0218565	0.0213592	0.0181164	3	0.020444	0.00165834
P161_RS0104080	P161_RS0104080	788	M28 family peptidase			18	18	18	13	12	9	10	10	10	12	10	10	43.7	45.315	751540000	51193000	44914000	14791000	82065000	36572000	74259000	186960000	123680000	137100000	24	19727000	1347000	1379000	428260	0.0114159	0.0175254	0.00601603	3	0.0116524	0.00470164	2455200	1044500	1921600	0.0197156	0.0120769	0.0271083	3	0.0196336	0.00613683
P161_RS0104095	P161_RS0104095	791	response regulator	RR|LytTR		5	5	5	2	1	0	0	3	2	2	2	1	16.7	29.043	11411000	978690	441390	0	0	1680400	3405000	2294600	1666300	944630	15	663420	46425	29426	0	0.000393456	0.000373967	0	2	0.000383712	0.000181058	0	112020	177930	0	0.00129522	0.00251009	2	0.00190265	0.00102491
P161_RS0104100	P161_RS0104100	792	tRNA dihydrouridine synthase DusB			14	14	14	4	5	5	5	6	6	3	11	4	42.8	37.473	76187000	2822500	3850900	5623200	3371700	5427900	2068300	15046000	27244000	10732000	21	2414000	134410	183380	267770	0.00113914	0.00233053	0.00376153	3	0.0024104	0.00107208	92478	216790	98491	0.000742613	0.00250661	0.00138943	3	0.00154622	0.000728633
P161_RS0104110	P161_RS0104110	794	ABC transporter permease			8	8	8	5	2	4	4	6	4	4	5	4	23.2	44.93	227930000	6721700	1369100	3264000	9876000	4279200	9165700	12770000	171000000	9486800	16	14246000	420110	85567	204000	0.00356047	0.00108745	0.00286571	3	0.00250454	0.00104141	617250	267450	572860	0.00495662	0.00309236	0.00808143	3	0.0053768	0.00205834
P161_RS0104115	P161_RS0104115	795	30S ribosome-binding factor RbfA			10	10	10	7	6	6	8	9	7	8	7	7	56.5	14.856	535140000	68454000	36820000	26989000	43255000	53403000	23571000	107710000	106600000	68347000	10	46722000	5981100	3263900	2444600	0.0506904	0.0414801	0.0343408	3	0.0421704	0.00669252	3659100	4619700	2154600	0.0293832	0.0534148	0.0303953	3	0.0377311	0.0110977
P161_RS0104120	P161_RS0104120	796	response regulator transcription factor	RR|NarL		5	5	5	0	0	0	1	5	0	2	2	4	23	24.318	8547900	0	0	0	166300	1557600	0	0	3021200	3802900	11	567800	0	0	0	0	0	0	0	0	0	15118	120570	0	0.0001214	0.00139408	0	2	0.000757739	0.000630511
P161_RS0104125	P161_RS0104125	797	two-component sensor histidine kinase	HK|Classic		13	13	13	8	9	5	5	7	2	11	10	8	53.8	28.448	87603000	3314900	4714100	2857600	2067200	4931000	307230	26724000	16294000	26393000	15	3150800	151800	209280	71989	0.00128652	0.00265969	0.00101127	3	0.00165249	0.000721003	67940	158050	20482	0.000545569	0.00182744	0.000288943	3	0.000887316	0.00067297
P161_RS0104135	P161_RS0104135	799	hypothetical protein			4	4	4	2	1	1	3	3	2	2	3	3	23.3	23.871	42840000	1696500	480720	403120	4107800	3675700	784280	8357000	13788000	9547100	13	1936200	65033	36979	31009	0.000551161	0.000469957	0.000435602	3	0.000485573	4.84516e-05	261630	203750	60329	0.00210093	0.00235584	0.000851072	3	0.00176928	0.000657558
P161_RS0104145	P161_RS0104145	801	F0F1 ATP synthase subunit beta			55	55	55	45	44	46	38	39	39	49	48	43	95.4	54.32	51010000000	4413900000	2.1175e+09	6.7886e+09	2.9903e+09	2467300000	1.5134e+09	11145000000	7.0786e+09	12495000000	29	870050000	87415000	44248000	117650000	0.74085	0.562336	1.6527	3	0.985296	0.477521	59872000	52053000	30683000	0.480782	0.601857	0.43285	3	0.505163	0.071118
P161_RS0104150	P161_RS0104150	802	OmpA family protein			33	33	33	26	26	26	30	29	28	29	29	28	51.6	48.192	38370000000	2815500000	1426800000	1110100000	5586400000	2385200000	4917500000	7.843e+09	7.1634e+09	5122500000	15	832770000	67003000	43263000	31970000	0.567857	0.549818	0.449102	3	0.522259	0.0522513	102890000	56029000	91607000	0.826223	0.647829	1.29232	3	0.922123	0.271709
P161_RS0104155	P161_RS0104155	803	glycine C-acetyltransferase			33	33	33	24	23	20	26	25	29	26	27	25	88.9	43.848	4.1403e+09	322950000	238220000	138730000	686930000	291990000	411600000	823480000	693450000	532970000	21	101690000	8811700	5848400	4174300	0.07468	0.0743258	0.0586389	3	0.0692149	0.00747974	14032000	7942000	10385000	0.112679	0.0918285	0.146503	3	0.117004	0.0225292
P161_RS0104160	P161_RS0104160	804	UvrD-helicase domain-containing protein			38	38	38	14	11	11	22	21	19	11	21	17	43.8	120.88	200220000	12133000	5592300	5748800	31894000	13746000	18973000	21296000	38686000	52155000	55	1845400	91247	60670	44762	0.000773327	0.000771039	0.000628799	3	0.000724388	6.75983e-05	206150	150970	237320	0.00165542	0.00174557	0.00334791	3	0.00224964	0.000777472
P161_RS0104170	P161_RS0104170	806	metal-dependent transcriptional regulator			11	11	11	8	8	7	4	4	2	9	6	6	39	24.391	55064000	3380900	2928500	1311500	14963000	825120	195760	13385000	9621500	8453100	14	3561400	226770	190490	76218	0.0019219	0.00242089	0.00107068	3	0.00180449	0.000557437	1029200	36028	13983	0.00826464	0.00041657	0.000197261	3	0.00295949	0.00375238
P161_RS0104175	P161_RS0104175	807	TonB-dependent receptor	SusC-like		9	9	9	4	7	3	5	3	4	5	4	3	14.9	86.737	34937000	2392600	2705000	1003000	3262600	1405000	2425700	9178300	7117400	5447700	34	858550	56612	60675	29500	0.000479792	0.000771103	0.000414405	3	0.0005551	0.000155052	95958	41323	71344	0.000770558	0.000477793	0.00100646	3	0.000751604	0.000216244
P161_RS0104185	P161_RS0104185	809	hypothetical protein			5	5	5	4	4	4	3	5	4	4	3	3	30.1	20.929	128450000	11105000	6906400	3972600	9205700	15529000	5367300	30626000	25931000	19804000	9	13846000	1233900	767370	441390	0.0104574	0.00975231	0.00620047	3	0.0088034	0.00186292	1022900	1725400	596370	0.00821405	0.0199497	0.00841309	3	0.0121923	0.00548595
P161_RS0104190	P161_RS0104190	810	transcription-repair coupling factor			36	36	36	20	24	19	18	16	16	17	15	20	33	128	269570000	15263000	15861000	13088000	18058000	9823800	13029000	20714000	77520000	86211000	53	3871100	207640	194340	214520	0.00175977	0.00246982	0.00301349	3	0.00241436	0.000513331	205130	148710	143450	0.00164723	0.00171944	0.00202367	3	0.00179678	0.000163124
P161_RS0104215	P161_RS0104215	815	serine/threonine protein phosphatase			7	7	7	5	5	2	4	3	1	4	4	3	33.1	28.039	31957000	3668800	3546300	582100	2513000	667520	214840	7758300	6296500	6709400	14	1661600	262060	219020	41578	0.00222098	0.00278347	0.000584072	3	0.00186284	0.00093293	179500	47680	15346	0.00144141	0.000551295	0.000216489	3	0.000736399	0.000516919
P161_RS0104220	P161_RS0104220	816	hypothetical protein			16	16	16	11	10	12	12	12	13	10	11	7	34.6	53.234	297220000	28233000	8583300	17559000	31821000	25502000	14862000	68223000	59608000	42831000	18	12601000	1422900	426990	754060	0.0120592	0.00542651	0.0105927	3	0.00935949	0.00284475	1529200	1259600	637770	0.0122797	0.014564	0.00899713	3	0.0119469	0.00228481
P161_RS0104225	P161_RS0104225	817	universal stress protein			22	22	22	13	15	13	14	12	14	16	19	13	69.7	31.351	1227600000	85907000	103850000	46280000	159480000	40829000	36792000	287350000	226730000	240420000	15	59193000	4326700	4980700	2667400	0.0366692	0.0632984	0.0374706	3	0.0458127	0.0123686	8914800	2507000	1445800	0.0715873	0.0289869	0.0203961	3	0.0403234	0.0223833
P161_RS0104235	P161_RS0104235	819	NAD(P)/FAD-dependent oxidoreductase			5	5	5	2	3	1	1	4	4	3	4	2	9.8	52.142	32482000	458300	1074800	300540	1571700	3337600	5832000	7468300	9209500	3229000	30	1077900	15277	35827	5171.5	0.000129474	0.000455316	7.26472e-05	3	0.000219146	0.000168601	52389	111250	194400	0.000420692	0.00128632	0.00274243	3	0.00148315	0.000958011
P161_RS0104240	P161_RS0104240	820	4Fe-4S binding protein			3	3	3	1	1	0	0	0	1	1	0	0	5.7	61.484	596700	519780	76913	0	0	0	0	0	0	0	19	31405	27357	4048	0	0.000231853	5.1445e-05	0	2	0.000141649	9.94147e-05	0	0	0	0	0	0	0	0	0
P161_RS0104250	P161_RS0104250	822	glycosyltransferase family 2 protein	CAZyme, single-domain, contains GT2 domain		7	7	7	5	4	3	3	3	2	2	3	4	26.5	25.978	24092000	2001500	2005400	2509800	469410	895010	1425100	4379100	7031900	3375000	11	1831700	152040	138090	228160	0.00128855	0.00175495	0.0032051	3	0.00208287	0.000816063	42673	81365	129560	0.000342671	0.000940774	0.00182773	3	0.00103706	0.000610082
P161_RS0104255	P161_RS0104255	823	glycosyltransferase	CAZyme, single-domain, contains GT2 domain		10	10	10	6	4	4	6	5	7	6	7	4	20.6	57.725	133770000	14668000	4847600	3240400	17508000	7823800	19266000	29891000	16312000	20214000	17	4450400	514880	196670	172640	0.00436366	0.00249943	0.00242518	3	0.00309609	0.000896818	509610	247580	519920	0.00409225	0.00286262	0.0073346	3	0.00476316	0.00188631
P161_RS0104265	P161_RS0104265	825	LacI family transcriptional regulator	OCS|LacI		22	22	22	11	9	10	14	16	14	19	14	13	66.9	37.773	1333900000	35482000	46278000	48925000	156290000	45941000	94980000	486890000	207600000	211520000	15	29326000	1364600	1589000	2751200	0.0115651	0.0201942	0.0386478	3	0.023469	0.0112963	4926600	1388300	2493500	0.0395614	0.0160521	0.0351762	3	0.0302632	0.010207
P161_RS0104270	P161_RS0104270	826	Cof-type HAD-IIB family hydrolase			13	13	13	3	4	4	5	5	2	7	6	6	54.1	30.488	46046000	2624200	1797100	2882100	2810700	1915800	1477100	12331000	8888900	11319000	13	1608500	132210	14988	163650	0.00112049	0.000190479	0.00229889	3	0.00120329	0.000862745	178790	126190	113620	0.00143571	0.00145906	0.00160286	3	0.00149921	7.39073e-05
P161_RS0104275	P161_RS0104275	827	carbon-nitrogen hydrolase family protein			16	16	16	7	9	6	7	13	9	11	9	7	53	35.799	194290000	6211800	13003000	8450800	22005000	8878900	10038000	52278000	37990000	35431000	17	5802200	287770	611730	326870	0.00243888	0.00777432	0.00459174	3	0.00493498	0.00219167	712950	317530	497220	0.0057251	0.00367141	0.00701437	3	0.00547029	0.0013766
P161_RS0104280	P161_RS0104280	828	hypothetical protein			5	5	5	3	3	1	2	2	3	3	3	4	26	23.233	25220000	1613100	1359600	93312	867450	865540	641050	8096200	3774900	7908900	11	967850	113440	81569	8482.9	0.000961414	0.00103664	0.000119164	3	0.000705739	0.000415907	78859	66438	58277	0.00063325	0.000768182	0.000822124	3	0.000741185	7.94351e-05
P161_RS0104285	P161_RS0104285	829	DUF2797 domain-containing protein			18	18	18	13	8	7	7	11	11	9	12	9	70	30.648	210280000	16017000	16216000	8335000	12593000	8048200	15324000	51213000	52570000	29966000	16	8584200	731960	741660	433260	0.00620343	0.00942557	0.00608627	3	0.00723842	0.00154728	555900	393270	651770	0.00446396	0.00454714	0.00919463	3	0.00606858	0.00221071
P161_RS0104290	P161_RS0104290	830	GH3 auxin-responsive promoter family protein			16	16	16	5	8	7	8	8	10	10	10	9	30.7	58.149	307910000	7187500	5323900	16841000	27603000	18872000	15487000	61082000	45643000	109860000	26	9517700	251160	204770	614090	0.0021286	0.00260237	0.0086265	3	0.00445249	0.0029578	990450	662000	514740	0.00795347	0.0076543	0.00726153	3	0.0076231	0.000283346
P161_RS0104295	P161_RS0104295	831	hypothetical protein			30	30	30	16	13	15	22	15	17	18	20	18	43.8	73.355	487700000	24775000	18453000	25310000	50685000	35276000	33794000	163040000	76730000	59644000	36	11357000	606470	487570	641310	0.00513989	0.0061964	0.00900887	3	0.00678172	0.00163283	1218400	933900	845080	0.00978394	0.0107981	0.0119217	3	0.0108346	0.000873111
P161_RS0104300	P161_RS0104300	832	polyprenyl synthetase family protein			17	17	17	9	6	8	8	8	7	11	9	8	58.2	37.18	146760000	8516700	6173600	6900900	15457000	6391200	8695500	53054000	24242000	17325000	21	4962900	325100	272100	286240	0.00275525	0.00345805	0.00402099	3	0.00341143	0.000517785	584700	189930	230100	0.00469523	0.00219604	0.00324606	3	0.00337911	0.00102462
P161_RS0104305	P161_RS0104305	833	DUF5615 family PIN-like protein			4	4	4	1	1	1	1	1	2	1	0	1	19.6	12.226	5018000	515310	610080	202340	553690	586140	397550	947410	0	1205500	8	435560	64414	76260	25293	0.000545915	0.000969169	0.000355306	3	0.000623463	0.000256537	69212	73267	49694	0.000555783	0.000847142	0.000701042	3	0.000701322	0.000118947
P161_RS0104315	P161_RS0104315	835	23S rRNA (adenine(2503)-C(2))-methyltransferase RlmN			15	15	15	6	4	5	8	7	8	8	7	7	51.9	39.35	152890000	9437800	4428900	6667100	18624000	8278400	5830700	43133000	39376000	17112000	18	5558200	470370	218650	310200	0.00398643	0.00277877	0.00435757	3	0.00370759	0.000674027	803660	359140	226870	0.00645352	0.00415252	0.00320049	3	0.00460218	0.00136557
P161_RS0104320	P161_RS0104320	836	tRNA preQ1(34) S-adenosylmethionine ribosyltransferase-isomerase QueA			40	40	40	23	28	20	26	22	26	31	30	27	75.4	39.77	6.9943e+09	361170000	293790000	204070000	1.0114e+09	304000000	322770000	1.8106e+09	1.7054e+09	981100000	20	125780000	8372100	7704600	5215000	0.0709543	0.0979158	0.0732583	3	0.0807095	0.012203	15238000	7591100	7165400	0.122364	0.0877713	0.101084	3	0.103739	0.0142466
P161_RS0104325	P161_RS0104325	837	3-phosphoshikimate 1-carboxyvinyltransferase			25	25	25	15	17	13	17	18	20	17	14	18	64.5	45.686	1095500000	98500000	42692000	33449000	166830000	60181000	153410000	191660000	143130000	205660000	21	32698000	3282800	1416300	1306300	0.027822	0.0179994	0.0183504	3	0.0213906	0.00454996	5283400	2324900	3775000	0.0424265	0.0268814	0.0532546	3	0.0408542	0.0108241
P161_RS0104330	P161_RS0104330	838	glycosyl hydrolase	CAZyme, multi-domain, contains four GH74 domains		66	66	66	44	43	49	48	47	54	48	56	55	61.4	115.77	6.4376e+09	451620000	237980000	370410000	686230000	388100000	712580000	1189600000	1.0602e+09	1340900000	46	93021000	6903000	3861700	5067400	0.0585036	0.0490774	0.0711849	3	0.0595886	0.0090579	9948600	5692800	9291900	0.0798888	0.0658224	0.131082	3	0.0922645	0.0280427
P161_RS0104350	P161_RS0104350	842	phosphatase PAP2 family protein			6	6	6	6	4	3	3	6	3	5	5	2	23.4	32.444	76132000	5580700	6796900	6770800	5743500	3819400	1294700	20292000	12830000	13004000	13	5415200	381310	488840	483190	0.00323164	0.00621254	0.00678766	3	0.00541061	0.00155856	441810	270940	99592	0.0035478	0.00313271	0.00140496	3	0.00269516	0.000927913
P161_RS0104355	P161_RS0104355	843	hypothetical protein			3	3	3	1	1	2	1	0	0	1	2	1	18.1	20.033	8307800	553600	0	0	267960	0	0	2859500	3141900	1484900	7	1186800	79085	0	0	0.000670253	0	0	1	0	0	38279	0	0	0.000307386	0	0	1	0	0
P161_RS0104365	P161_RS0104365	845	alpha/beta fold hydrolase	*		13	13	13	8	6	6	6	10	8	10	9	10	72	29.6	567880000	26114000	37091000	14593000	6785800	12657000	25413000	64440000	90118000	290670000	13	4920500	465240	295790	404630	0.00394295	0.00375912	0.00568408	3	0.00446205	0.000867361	131900	281370	172030	0.00105918	0.00325331	0.00242686	3	0.00224645	0.000904789
P161_RS0104370	P161_RS0104370	846	pyridoxine 5'-phosphate synthase			16	16	16	13	10	9	9	9	9	12	13	12	68.4	26.5	1283600000	110990000	133730000	91880000	77760000	37114000	97187000	299190000	216560000	219170000	11	61943000	6664300	5955700	4278300	0.0564806	0.0756895	0.0600999	3	0.06409	0.00833411	2614700	2807400	2475600	0.0209965	0.0324603	0.0349237	3	0.0294601	0.00606864
P161_RS0104375	P161_RS0104375	847	CBS domain-containing protein			11	11	11	2	4	4	4	3	4	6	6	7	52.5	25.43	72554000	2429100	3598100	4575800	3628300	1326200	2412800	16578000	15231000	22775000	14	3234900	108090	210540	35573	0.000916073	0.0026757	0.000499716	3	0.00136383	0.000943076	259160	56552	124940	0.0020811	0.000653876	0.00176255	3	0.00149917	0.000611699
P161_RS0104380	P161_RS0104380	848	NAD kinase			17	17	17	13	10	8	12	12	11	11	13	10	69.2	33.372	558240000	20152000	19165000	13398000	52992000	16123000	257600000	60848000	60135000	57824000	16	17018000	1095400	1120000	744780	0.00928362	0.0142338	0.0104624	3	0.0113266	0.00211127	2170500	626860	1181100	0.0174295	0.007248	0.016662	3	0.0137798	0.0046293
P161_RS0104385	P161_RS0104385	849	hypothetical protein			5	5	5	4	4	3	2	5	3	4	5	5	28	25.529	158110000	6111700	8904200	9425100	37895000	8351000	12049000	29332000	23574000	22466000	6	20401000	955130	676230	1312700	0.00809481	0.00859403	0.0184403	3	0.0117097	0.0047636	6315900	1241600	1149300	0.0507177	0.0143559	0.0162134	3	0.0270956	0.0167205
P161_RS0104390	P161_RS0104390	850	isoprenyl transferase			15	15	15	6	7	7	8	11	7	13	11	12	64.4	28.456	343510000	29421000	26555000	17935000	22102000	21819000	6459000	80542000	61534000	77141000	14	18733000	1694100	1439900	1087800	0.0143577	0.0182993	0.015281	3	0.0159793	0.00168324	1434200	1009800	436540	0.0115169	0.0116757	0.00615834	3	0.00978363	0.00256429
P161_RS0104395	P161_RS0104395	851	outer membrane protein assembly factor BamA			50	50	50	28	34	26	29	31	32	29	35	29	59.6	94.66	2300600000	218350000	141040000	93425000	218730000	159050000	157760000	538860000	387360000	386000000	39	26846000	2616900	1905900	1456800	0.0221785	0.0242216	0.0204646	3	0.0222882	0.00153576	3266600	2183400	2144200	0.0262313	0.0252453	0.0302486	3	0.0272417	0.00216393
P161_RS0104400	P161_RS0104400	852	OmpH family outer membrane protein			24	24	24	12	11	10	13	13	10	18	16	16	56.1	33.603	809730000	29577000	29847000	44350000	146450000	39165000	67410000	174330000	147730000	130870000	14	7541900	447730	235310	689520	0.00379455	0.00299049	0.00968611	3	0.00549039	0.00298493	729420	477000	634650	0.00585736	0.00551526	0.00895312	3	0.00677525	0.00154631
P161_RS0104405	P161_RS0104405	853	OmpH family outer membrane protein			35	35	35	28	25	25	28	25	24	27	29	30	81	18.812	8.366e+09	799680000	523690000	292760000	778890000	740830000	222230000	1.4914e+09	2151800000	1364800000	11	434430000	44746000	30618000	15434000	0.379226	0.389116	0.216811	3	0.328385	0.0789978	39826000	38534000	12898000	0.319809	0.445545	0.181954	3	0.31577	0.107648
P161_RS0104410	P161_RS0104410	854	glutamate racemase			14	14	14	8	6	9	6	7	6	9	8	8	54.5	29.3	148150000	14827000	10329000	10912000	9208400	6270700	2978800	37181000	22100000	34348000	15	6973700	680870	428460	537380	0.00577044	0.00544519	0.0075489	3	0.00625484	0.000924624	535050	323830	198590	0.00429654	0.00374425	0.00280154	3	0.00361411	0.000617227
P161_RS0104415	P161_RS0104415	855	type IX secretion system membrane protein PorP/SprF			5	5	5	2	3	3	5	5	4	5	4	4	15.3	36.708	261570000	3658300	10415000	3794400	45031000	17939000	23192000	83949000	38892000	34705000	12	21317000	304860	867910	316200	0.00258372	0.01103	0.00444185	3	0.00601854	0.00362395	3752500	1454100	1932600	0.0301332	0.0168129	0.0272635	3	0.0247365	0.00572404
P161_RS0104420	P161_RS0104420	856	PKD domain-containing protein	*		16	16	16	8	10	10	11	10	14	11	13	13	9.9	245.97	132180000	1144800	5539000	2347600	21875000	12679000	7729700	27340000	22289000	31240000	27	4248000	39030	187600	80704	0.000330783	0.00238416	0.0011337	3	0.00128288	0.000844899	727290	416120	256630	0.00584025	0.00481134	0.00362032	3	0.00475731	0.000907088
P161_RS18035	P161_RS18035	857	type IX secretion system membrane protein PorP/SprF			2	2	2	1	2	0	2	1	2	1	1	1	8.4	38.014	14240000	297900	1473800	0	3627100	596990	715230	2627100	1630900	3270900	8	1312600	37238	184220	0	0.000315595	0.0023412	0	2	0.0013284	0.0010373	453380	46998	55717	0.00364071	0.000543409	0.000786009	3	0.00165671	0.00140639
P161_RS0104430	P161_RS0104430	858	hypothetical protein			3	3	3	0	1	1	3	1	0	1	1	1	16	17.812	38482000	0	2089000	1241100	4611900	4094500	0	18689000	7757300	0	8	4719700	0	261130	155130	0	0.00331863	0.00217921	2	0.00274892	0.00137681	485850	511820	0	0.00390145	0.00591786	0	2	0.00490966	0.00245647
P161_RS0104435	P161_RS0104435	859	DUF4837 family protein			31	31	31	20	22	21	26	24	20	25	27	23	81.3	36.749	6.7106e+09	497790000	446490000	708600000	1377400000	445550000	504060000	1267300000	1115200000	348170000	14	191080000	16416000	18428000	23073000	0.139127	0.234197	0.324121	3	0.232481	0.075533	30057000	14835000	11046000	0.241362	0.171528	0.155828	3	0.189573	0.0371775
P161_RS0104440	P161_RS0104440	860	lytic transglycosylase domain-containing protein	CAZyme, multi-domain, contains a GH23 and a CBM50 domain		8	8	8	1	1	3	6	4	3	4	8	3	17	50.101	96714000	757650	674870	1601400	7168200	2873600	1935500	16462000	32540000	32701000	24	3108700	31569	28120	46527	0.00026755	0.00035737	0.000653593	3	0.000426171	0.000164939	228430	119730	80647	0.00183433	0.00138437	0.0011377	3	0.00145213	0.000288406
P161_RS0104445	P161_RS0104445	861	exodeoxyribonuclease III			13	13	13	9	8	7	9	6	8	10	10	7	55.7	29.35	433590000	34928000	28201000	11462000	91814000	18423000	33184000	89412000	72497000	53671000	14	26372000	2138200	1848300	708560	0.0181214	0.0234896	0.00995357	3	0.0171882	0.00556531	6231500	1264100	1866400	0.0500399	0.014616	0.0263296	3	0.0303285	0.0147356
P161_RS0104460	P161_RS0104460	863	CoA transferase subunit B			8	8	8	5	6	5	6	6	5	6	5	5	53.4	23.449	557550000	37454000	60253000	31572000	91812000	23234000	107640000	76406000	69600000	59587000	8	32453000	3482500	3138400	2739000	0.0295145	0.0398851	0.0384764	3	0.0359587	0.00459286	3123300	1930000	1478500	0.0250806	0.0223154	0.0208575	3	0.0227512	0.0017514
P161_RS0104465	P161_RS0104465	864	CoA transferase subunit A			16	16	16	12	9	13	12	12	9	13	12	12	68.7	25.633	1294100000	121980000	124980000	100540000	194410000	76048000	53133000	224540000	166870000	231580000	9	98130000	10076000	10407000	7267800	0.085395	0.13226	0.102095	3	0.106583	0.0193939	12567000	6112300	5234500	0.100915	0.0706728	0.073844	3	0.0818106	0.0135707
P161_RS0104470	P161_RS0104470	865	penicillin-binding protein	CAZyme, single-domain, contains GT51 domain		44	44	44	28	27	14	32	29	26	29	31	30	62.3	84.729	1.5977e+09	123970000	79820000	28502000	158120000	148070000	143870000	506110000	257570000	151650000	36	21555000	1928300	1420000	426410	0.0163425	0.0180464	0.00599004	3	0.0134597	0.00532743	1902900	1772200	2082900	0.0152806	0.0204909	0.0293838	3	0.0217184	0.00582269
P161_RS0104475	P161_RS0104475	866	gliding motility lipoprotein GldH			3	3	3	2	2	1	1	2	2	2	2	0	21.1	19.185	11091000	1387900	1232000	255010	749360	2245200	274320	2938400	2008600	0	7	895740	149950	84320	36430	0.00127084	0.0010716	0.000511754	3	0.000951399	0.00032134	107050	223090	39188	0.000859628	0.00257945	0.000552832	3	0.00133064	0.000891884
P161_RS0104480	P161_RS0104480	867	hypothetical protein			17	17	17	10	11	9	12	10	12	13	11	9	37.3	54.775	179360000	5991200	6893500	5301900	14989000	11432000	7559000	41245000	26367000	59580000	25	5916500	239650	275740	212080	0.00203106	0.00350431	0.00297922	3	0.00283819	0.000609663	593460	386940	204500	0.00476558	0.00447395	0.00288492	3	0.00404148	0.000826436
P161_RS18975	P161_RS18975	869	BspA family leucine-rich repeat surface protein			2	2	2	1	1	0	1	0	1	0	0	0	1.4	159.86	12148000	2562000	1653400	0	1390200	0	6542800	0	0	0	17	714610	150710	97256	0	0.00127728	0.001236	0	2	0.00125664	0.000592626	81776	0	384870	0.000656674	0	0.00542943	2	0.00304305	0.00241957
P161_RS18980	P161_RS18980	870	response regulator transcription factor	RR|LytTR		4	4	4	4	2	1	2	2	0	4	3	2	16.6	25.865	13947000	1279500	606100	338610	875080	643360	0	4969400	2799900	2435100	13	1072800	98424	46623	26047	0.000834152	0.00059252	0.000365898	3	0.000597523	0.000191197	67314	49489	0	0.000540542	0.000572211	0	2	0.000556377	0.000262597
P161_RS0104500	P161_RS0104500	871	sensor histidine kinase	HK|Classic		4	4	4	1	1	1	1	2	0	0	1	2	11	66.498	13417000	1680500	2007600	2010200	2597400	978380	0	0	3397400	745190	30	442530	56018	66919	67008	0.000474758	0.000850456	0.000941302	3	0.000755505	0.000201953	86580	32613	0	0.000695251	0.000377084	0	2	0.000536168	0.000284175
P161_RS0104520	P161_RS0104520	875	porin			23	23	23	10	8	8	18	18	13	18	14	11	54.5	45.27	175370000	7836800	5507500	4857800	16267000	13613000	8901700	57678000	46276000	14435000	25	5567000	313470	195430	176180	0.00265669	0.00248367	0.00247491	3	0.00253842	8.37028e-05	454030	466070	299270	0.00364593	0.00538888	0.00422185	3	0.00441889	0.000725069
P161_RS0104525	P161_RS0104525	876	phosphate:sodium symporter			20	20	20	13	8	13	10	10	9	14	12	10	26.1	82.729	664830000	219750000	15248000	47730000	40750000	31279000	15541000	115380000	80535000	98620000	29	8675300	1444400	468340	712060	0.0122414	0.00595201	0.0100027	3	0.00939873	0.00260292	613960	611440	367030	0.0049302	0.00706971	0.00517776	3	0.00572589	0.000955585
P161_RS0104530	P161_RS0104530	877	patatin			21	21	21	4	7	8	10	10	11	5	11	11	36.6	83.159	119910000	8873900	4559500	6540600	12781000	7836300	12169000	24738000	25108000	17302000	34	2932500	261000	134100	169820	0.002212	0.00170424	0.00238557	3	0.0021006	0.000289087	342850	221140	336720	0.00275314	0.00255691	0.00475017	3	0.0033534	0.000990904
P161_RS0104535	P161_RS0104535	878	excinuclease ABC subunit UvrC			14	14	14	0	0	0	5	4	1	3	6	10	24.1	69.792	25725000	0	0	0	1518300	1784700	312620	6619700	6584300	8905800	32	478870	0	0	0	0	0	0	0	0	0	39893	36700	9769.3	0.000320347	0.00042434	0.000137817	3	0.000294168	0.000118428
P161_RS0104540	P161_RS0104540	879	DUF4230 domain-containing protein			14	14	14	6	3	6	7	9	7	9	8	7	60.2	23.647	126320000	6717700	2217000	3229400	8594400	10449000	10814000	40500000	27570000	16224000	14	4772600	318200	150920	129360	0.00269677	0.001918	0.0018172	3	0.00214399	0.000393036	499880	551000	268470	0.00401412	0.00637088	0.00378735	3	0.00472412	0.00116811
P161_RS0104550	P161_RS0104550	881	glycine--tRNA ligase			43	43	43	27	20	28	25	19	20	25	27	25	69.6	59.238	3.0733e+09	233820000	74160000	265460000	304360000	143250000	80937000	638500000	469470000	863340000	30	41460000	3455500	1197800	2907900	0.0292857	0.0152225	0.040849	3	0.0284524	0.0104786	3813700	2057000	1073200	0.0306246	0.0237838	0.0151398	3	0.0231828	0.00633591
P161_RS0104565	P161_RS0104565	884	Ig-like domain-containing protein			21	21	21	11	14	9	12	13	9	13	13	10	32.5	61.886	363960000	26245000	24207000	11745000	24941000	20453000	24002000	118700000	72904000	40771000	36	8932700	667990	630230	326260	0.00566128	0.00800943	0.00458317	3	0.00608463	0.00143044	596100	558760	620390	0.00478678	0.0064606	0.00875195	3	0.00666644	0.0016253
P161_RS0104570	P161_RS0104570	885	cystathionine gamma-synthase			13	13	13	7	9	7	7	7	8	10	11	7	54.5	41.934	312820000	20968000	14687000	8854000	32598000	11373000	10455000	90148000	78941000	44798000	14	16123000	1084300	803440	491940	0.00918954	0.0102107	0.00691058	3	0.00877028	0.00137951	1799600	653360	620150	0.0144511	0.0075544	0.00874856	3	0.0102513	0.00300941
P161_RS0104580	P161_RS0104580	886	DinB family protein			8	8	8	7	5	5	7	7	4	7	5	6	37.1	17.393	347790000	18132000	17994000	8112700	35156000	14169000	2729800	157210000	44203000	50087000	5	13497000	1182800	343250	201880	0.0100243	0.00436228	0.00283593	3	0.00574085	0.00309232	1175900	1046300	466220	0.00944266	0.0120977	0.00657705	3	0.00937248	0.00225436
P161_RS0104585	P161_RS0104585	887	arsenate reductase			12	12	12	6	6	4	7	7	5	6	6	3	78.3	13.577	111430000	9087900	3993900	1691600	7133000	10493000	2034500	18916000	47679000	10405000	8	9202700	1011900	379100	192890	0.00857595	0.00481788	0.00270964	3	0.00536782	0.00242627	772040	1084300	190570	0.0061996	0.0125371	0.0026884	3	0.0071417	0.00407553
P161_RS0104595	P161_RS0104595	889	hypothetical protein			5	5	5	3	3	3	3	3	2	4	3	2	24.2	16.887	207860000	31419000	6451100	2197200	11716000	12014000	3508000	39086000	56950000	44517000	7	16130000	1370700	921580	313880	0.0116168	0.0117121	0.00440926	3	0.00924607	0.00342036	1673600	640730	501150	0.0134393	0.00740837	0.00706981	3	0.00930582	0.00292606
P161_RS0104610	P161_RS0104610	892	glycosyltransferase family 4 protein	CAZyme, single-domain, contains GT4 domain		13	13	13	3	6	5	10	6	6	6	6	5	32.4	36.971	69788000	975370	3011900	4173300	11469000	3032900	2096500	24524000	13736000	6768500	19	2701900	51335	118250	183450	0.000435069	0.00150281	0.00257703	3	0.00150497	0.000874455	524160	107680	75919	0.00420909	0.00124504	0.001071	3	0.00217504	0.00144004
P161_RS0104615	P161_RS0104615	893	hypothetical protein			12	12	12	3	5	4	6	6	10	5	6	8	35.2	35.105	207670000	6288500	5925400	6070500	45583000	11472000	34758000	34337000	29092000	34147000	16	12265000	393030	370340	348840	0.00333097	0.00470656	0.00490037	3	0.00431263	0.000698637	2849000	716980	1951900	0.0228779	0.00829	0.0275358	3	0.0195679	0.00819826
P161_RS18050	P161_RS18050	894	thymidine kinase			7	7	7	3	2	2	1	4	1	4	4	4	29	25.102	65153000	2799700	4266400	3239500	5026600	7284600	1726600	13194000	13641000	13974000	11	4196600	179970	353010	294500	0.00152526	0.00448631	0.00413702	3	0.00338287	0.00132124	456960	624430	156970	0.00366946	0.0072199	0.0022144	3	0.00436792	0.00210232
P161_RS0104625	P161_RS0104625	895	alanine racemase			7	7	7	5	7	6	5	4	4	6	4	4	19.1	41.328	44911000	4204300	6085000	6939900	6384000	1534200	1276800	12172000	1337200	4977000	15	2198800	269160	285260	339120	0.00228116	0.0036253	0.00476383	3	0.00355676	0.0010147	253960	102280	56962	0.00203934	0.0011826	0.000803573	3	0.00134184	0.000516912
P161_RS0104630	P161_RS0104630	896	large-conductance mechanosensitive channel protein MscL			6	6	6	6	4	5	6	5	4	6	5	5	34.1	14.765	5019400000	267830000	243070000	119990000	251090000	113100000	79099000	1.935e+09	1.8554e+09	154780000	3	160040000	6021100	7725300	3871900	0.0510294	0.0981789	0.0543909	3	0.0678664	0.021478	7239700	4471200	2349200	0.0581359	0.0516978	0.0331406	3	0.0476581	0.0105966
P161_RS18985	P161_RS18985	898	hypothetical protein			7	7	7	0	0	0	1	3	0	4	2	2	29.9	28.535	6593100	0	0	0	1843800	495200	0	1763300	1621500	869210	14	258830	0	0	0	0	0	0	0	0	0	131700	17052	0	0.00105757	0.000197162	0	2	0.000627367	0.000459182
P161_RS0104650	P161_RS0104650	899	hypothetical protein			15	15	15	4	5	6	7	8	8	12	13	12	46.5	29.675	237420000	4728100	15066000	5567800	11070000	6774000	13182000	73121000	53966000	53944000	15	11490000	315200	1004400	336290	0.00267135	0.0127647	0.00472407	3	0.00672003	0.00435558	531740	427460	804910	0.00426996	0.00494246	0.011355	3	0.00685581	0.00319324
P161_RS0104665	P161_RS0104665	901	cystathionine beta-synthase			46	46	46	38	31	33	31	30	31	29	34	34	69.1	69.207	1.9331e+09	267450000	90217000	237660000	140440000	101360000	72786000	350360000	298700000	374080000	35	35725000	5028500	2020700	3686000	0.042617	0.0256806	0.0517795	3	0.0400257	0.0108113	2512500	2156500	1473100	0.0201758	0.0249343	0.0207813	3	0.0219638	0.00211497
P161_RS0104670	P161_RS0104670	902	hypothetical protein			2	2	2	0	0	0	0	1	0	2	0	1	27.3	14.034	3716700	0	0	0	0	350220	0	1334800	0	2031700	7	463000	0	0	0	0	0	0	0	0	0	0	50031	0	0	0.000578478	0	1	0	0
P161_RS0104675	P161_RS0104675	903	DEAD/DEAH box helicase			20	20	20	14	12	13	14	12	10	12	13	9	47.9	51.517	762680000	107330000	31667000	75752000	68275000	33246000	36264000	124280000	143800000	142070000	24	22292000	2178800	1080800	2259100	0.0184655	0.0137356	0.031735	3	0.021312	0.00761888	2467200	1178400	1205500	0.019812	0.0136251	0.0170062	3	0.0168144	0.00252942
P161_RS0104680	P161_RS0104680	904	TatD family hydrolase			7	7	7	6	6	5	4	5	5	6	2	4	26.8	29.457	43120000	7600300	7119100	3348500	4270200	2413400	2244200	5872500	6087500	4164700	16	2630600	446810	444940	187410	0.00378676	0.00565463	0.00263266	3	0.00402468	0.00124513	266890	136460	140260	0.00214317	0.0015778	0.00197867	3	0.00189988	0.000237438
P161_RS0104685	P161_RS0104685	905	hypothetical protein			14	14	14	10	5	4	4	8	7	9	10	9	47.8	42.149	125260000	8482300	5185600	4498400	8960300	5106600	9856700	35330000	25255000	22584000	18	4145800	387480	288090	195320	0.00328393	0.00366126	0.00274378	3	0.00322966	0.000376521	339480	231520	261060	0.00272608	0.00267692	0.00368282	3	0.00302861	0.000463032
P161_RS0104695	P161_RS0104695	907	hypothetical protein			15	15	15	2	7	6	4	6	5	1	6	3	12.8	129.94	133140000	9530700	2901500	2885200	9887800	24565000	1646800	6426900	74188000	1105000	59	2235700	147090	49177	48902	0.0012466	0.000624978	0.000686956	3	0.000852845	0.000279575	167590	416350	21530	0.00134577	0.004814	0.000303727	3	0.0021545	0.00192807
P161_RS0104710	P161_RS0104710	910	efflux RND transporter periplasmic adaptor subunit			12	12	12	3	2	1	3	5	4	5	3	4	32.3	42.321	29862000	1315400	1090600	484180	2202000	1925900	1018800	10095000	5780800	5948900	20	993900	65772	54532	24209	0.000557424	0.000693033	0.000340079	3	0.000530179	0.000145375	83922	68554	39838	0.000673907	0.000792648	0.000562002	3	0.000676186	9.41749e-05
P161_RS0104715	P161_RS0104715	911	DUF3575 domain-containing protein			13	13	13	11	9	7	8	8	8	8	7	8	77.1	21.486	1387900000	246420000	105710000	60028000	77102000	136340000	44331000	201660000	329720000	186610000	11	76021000	14285000	5886500	3160400	0.121067	0.07481	0.0443961	3	0.0800909	0.0315226	4029600	9115300	2802400	0.0323583	0.105395	0.0395339	3	0.0590956	0.0328692
P161_RS0104720	P161_RS0104720	912	DUF3575 domain-containing protein			10	10	10	7	5	5	6	9	6	7	6	6	72.3	18.513	959500000	95909000	54857000	26668000	80964000	133090000	39996000	211560000	169760000	146690000	9	95483000	10236000	5998000	2916700	0.086751	0.076227	0.0409727	3	0.0679836	0.0195769	8847200	9631000	3921900	0.0710444	0.111357	0.0553269	3	0.0792429	0.0235975
P161_RS0104725	P161_RS0104725	913	aminoacyl-tRNA hydrolase			4	4	4	3	0	0	0	3	1	2	1	2	20.9	15.372	17238000	5657500	0	0	0	2161600	255760	1714100	4556100	2892800	4	163460	1414400	0	0	0.0119872	0	0	1	0	0	0	99514	63941	0	0.00115062	0.000902027	2	0.00102632	0.000494343
P161_RS0104730	P161_RS0104730	914	BamA/TamA family outer membrane protein			20	20	20	11	13	9	15	14	13	18	15	14	51.6	45.487	1444500000	52048000	40249000	27048000	218600000	61728000	39547000	509700000	351570000	144050000	17	34278000	1837700	1054200	900390	0.0155747	0.0133976	0.0126483	3	0.0138735	0.00124118	5194600	2046200	1689100	0.0417135	0.023659	0.0238284	3	0.0297336	0.00847131
P161_RS0104735	P161_RS0104735	915	TonB-dependent receptor	SusC-like		47	47	47	35	39	23	32	34	32	22	36	29	69.7	87.152	3.1364e+09	456960000	512260000	164300000	237690000	287760000	251450000	412350000	448660000	364960000	33	59993000	8788800	9088600	3811600	0.0744859	0.115505	0.0535439	3	0.0811781	0.0257342	5084800	5998400	5581400	0.0408317	0.0693558	0.0787378	3	0.0629751	0.0161194
P161_RS0104740	P161_RS0104740	916	hypothetical protein			5	5	5	2	0	0	3	3	0	4	2	1	33.3	17.461	80944000	7258800	0	0	3219400	2023100	0	12999000	50593000	4851200	6	878510	138020	0	0	0.00116973	0	0	1	0	0	347190	61011	0	0.00278799	0.000705433	0	2	0.00174671	0.00118357
P161_RS0104755	P161_RS0104755	919	lysophospholipid acyltransferase family protein			28	28	28	10	8	11	15	12	11	15	17	18	45.9	69.297	268360000	16045000	6275500	14528000	18939000	22018000	10612000	77325000	61890000	40729000	37	4898100	345830	162310	343890	0.00293094	0.00206276	0.00483083	3	0.00327484	0.00115593	409820	472190	242870	0.00329092	0.00545965	0.00342621	3	0.00405892	0.000991998
P161_RS0104760	P161_RS0104760	920	aspartate kinase			25	25	25	2	1	2	11	11	13	14	13	17	52.5	47.421	339220000	926400	1948100	1883800	51832000	15853000	28856000	89970000	59611000	88340000	26	10079000	35631	74928	72452	0.000301976	0.000952241	0.00101778	3	0.000757331	0.000323095	1704100	462830	1088700	0.0136842	0.00535142	0.0153585	3	0.0114647	0.00437645
P161_RS0104765	P161_RS0104765	921	GNAT family N-acetyltransferase			6	6	6	2	1	2	3	4	5	5	5	6	36.1	18.099	177570000	2170300	886610	711840	8349000	9268900	5179000	47083000	63226000	40697000	10	11652000	217030	88661	29561	0.00183935	0.00112677	0.000415261	3	0.00112713	0.000581381	615250	689410	429170	0.00494055	0.00797123	0.00605438	3	0.00632205	0.00125166
P161_RS0104770	P161_RS0104770	922	class 1 fructose-bisphosphatase			25	25	25	17	17	18	19	16	17	20	19	15	68.5	37.365	1.4764e+09	96326000	89145000	69085000	108810000	68548000	47085000	448820000	393870000	154720000	16	27137000	2326800	2104300	1505600	0.0197198	0.026743	0.0211501	3	0.0225376	0.00303042	2046600	1833800	1135600	0.0164345	0.0212031	0.0160201	3	0.0178859	0.00235171
P161_RS0104775	P161_RS0104775	923	superoxide dismutase			17	17	17	14	13	13	13	12	11	15	15	13	76.7	22.452	15178000000	2256000000	1.5907e+09	854100000	1.533e+09	339640000	326400000	3.0755e+09	2715700000	2487100000	12	480400000	71523000	54901000	32060000	0.606164	0.697723	0.450366	3	0.584751	0.102112	28193000	21345000	11998000	0.226394	0.246799	0.169258	3	0.21415	0.0328187
P161_RS18990	P161_RS18990	924	T9SS type A sorting domain-containing protein			2	2	2	0	1	0	0	1	0	0	0	0	2.4	124.67	1221300	0	629700	0	0	591630	0	0	0	0	45	13993	0	13993	0	0	0.000177833	0	1	0	0	0	13147	0	0	0.000152011	0	1	0	0
P161_RS0104790	P161_RS0104790	926	response regulator transcription factor	RR|NarL		4	4	4	3	3	0	1	3	1	4	3	4	20.2	24.429	16444000	533350	858120	0	1308500	1007700	263870	3605700	3758100	5108600	11	1197300	36566	78011	0	0.0003099	0.000991422	0	2	0.000650661	0.000414116	118950	91612	23988	0.000955187	0.00105925	0.000338403	3	0.000784281	0.000318133
P161_RS0104795	P161_RS0104795	927	hypothetical protein	HK|Classic		34	34	34	8	7	6	27	23	19	26	23	20	47.9	73.552	514590000	6182700	4213700	2436000	56848000	30613000	38287000	189600000	103420000	82978000	35	10269000	131400	101170	56312	0.00111363	0.00128574	0.000791049	3	0.00106347	0.000205048	1206900	713930	916320	0.0096916	0.00825474	0.0129267	3	0.010291	0.00195384
P161_RS0104800	P161_RS0104800	928	hypothetical protein			37	37	37	22	19	18	26	22	21	21	24	24	56.8	71.736	895320000	65214000	28481000	60891000	66906000	47384000	45873000	297210000	173890000	109470000	35	14303000	1347600	603110	1053800	0.011421	0.00766477	0.0148034	3	0.0112964	0.00291565	1169600	903110	913100	0.00939207	0.0104421	0.0128813	3	0.0109051	0.0014616
P161_RS0104805	P161_RS0104805	929	sugar kinase			25	25	25	22	19	19	16	18	18	19	17	16	80.2	33.827	2331600000	225120000	209210000	146400000	240070000	81316000	312300000	430540000	342620000	344040000	13	96083000	8599900	9554300	7424800	0.0728849	0.121423	0.104301	3	0.0995363	0.0201	9545800	3881600	9013200	0.0766543	0.0448806	0.127151	3	0.0828952	0.0338753
P161_RS0104810	P161_RS0104810	930	SufE family protein			12	12	12	7	5	5	8	8	7	10	7	6	69.5	16.198	348040000	25002000	8339800	4533600	22889000	35216000	12683000	99489000	90272000	49613000	12	23307000	2083500	694980	377800	0.0176579	0.00883232	0.00530719	3	0.0105991	0.00519461	1686100	2400100	1018900	0.0135396	0.0277509	0.0143738	3	0.0185548	0.00651155
P161_RS0104815	P161_RS0104815	931	DUF59 domain-containing protein			5	5	5	3	0	1	4	3	0	3	3	4	65.1	12.026	118710000	2833200	0	0	11498000	3758000	0	24952000	39568000	36105000	4	21319000	292500	0	0	0.00247896	0	0	1	0	0	2286500	708010	0	0.018361	0.00818629	0	2	0.0132736	0.00751047
P161_RS0104820	P161_RS0104820	932	DUF2480 family protein			5	5	5	3	1	1	3	3	2	4	4	2	32	19.379	60451000	3007600	439940	285590	4523500	2865900	506360	12874000	23412000	12536000	7	3500500	275360	62848	40798	0.0023337	0.000798719	0.000573114	3	0.00123518	0.000782214	377840	265400	46295	0.00303411	0.00306866	0.000653092	3	0.00225196	0.00113066
P161_RS0104825	P161_RS0104825	933	DUF3078 domain-containing protein			11	11	11	7	7	6	6	8	5	8	7	4	37.7	31.329	129020000	11924000	11622000	7574800	16128000	6109800	5946900	22246000	27586000	19880000	13	7885000	669650	651560	477140	0.00567535	0.00828051	0.00670268	3	0.00688618	0.00107144	956430	328970	395100	0.00768028	0.00380368	0.00557374	3	0.0056859	0.0015846
P161_RS0104830	P161_RS0104830	934	DUF3078 domain-containing protein			17	17	17	10	10	9	11	12	11	14	14	13	46.2	34.491	1391600000	81429000	114000000	104520000	184490000	54114000	84367000	348370000	242510000	177820000	14	74181000	4660100	6845100	6024600	0.0394948	0.0869926	0.0846312	3	0.0703729	0.0218554	10679000	2988000	3829400	0.0857541	0.0345484	0.054022	3	0.0581082	0.0211033
P161_RS0104835	P161_RS0104835	935	DUF21 domain-containing protein			22	22	22	11	13	10	11	14	12	16	18	17	42.6	41.201	926470000	39611000	40806000	53733000	65001000	33546000	33349000	293940000	260020000	106470000	16	20355000	1153000	1297900	1231800	0.00977178	0.0164947	0.0173038	3	0.0145234	0.00337613	1461900	1530000	821330	0.0117393	0.0176905	0.0115866	3	0.0136721	0.00284207
P161_RS0104840	P161_RS0104840	936	GTPase HflX			24	24	24	17	15	15	15	15	15	18	18	18	62.7	46.725	1.4912e+09	157690000	99744000	75220000	182330000	36575000	109990000	334990000	201410000	293230000	22	28770000	3957400	2782500	2374700	0.0335393	0.0353621	0.0333589	3	0.0340868	0.000904793	3789200	799140	1870800	0.0304279	0.00923997	0.0263917	3	0.0220198	0.00918574
P161_RS0104845	P161_RS0104845	937	carbonic anhydrase			11	11	11	9	7	9	5	9	5	4	8	7	54.6	27.198	129680000	23067000	17832000	11024000	6855100	8548200	3123500	20269000	21162000	17794000	14	7660800	1005100	1180900	683180	0.00851831	0.0150078	0.00959705	3	0.011041	0.00283925	473900	496340	223110	0.00380549	0.00573888	0.00314745	3	0.00423061	0.00109982
P161_RS0104850	P161_RS0104850	938	DUF2490 domain-containing protein			8	8	8	6	6	3	3	1	1	1	0	1	32.2	27.108	15695000	4396200	3820100	825170	4765800	216320	275820	922530	0	472830	12	1307900	366350	318340	68764	0.00310485	0.0040457	0.00096597	3	0.00270551	0.00128861	397150	18026	22985	0.00318918	0.000208424	0.000324253	3	0.00124062	0.00137865
P161_RS0104855	P161_RS0104855	939	endonuclease			3	3	3	2	1	3	0	1	0	1	0	1	7.7	37.472	4055800	464640	250130	1189200	0	0	0	1338300	0	813500	17	238570	27332	14713	69952	0.000231641	0.000186984	0.000982658	3	0.000467094	0.000365014	0	0	0	0	0	0	0	0	0
P161_RS0104865	P161_RS0104865	941	glycerophosphodiester phosphodiesterase			10	10	10	3	2	4	7	5	5	8	5	5	30.6	37.53	84837000	2538400	1579500	4122000	14800000	4065400	6456800	31219000	10326000	9729500	17	3324900	92603	92909	210790	0.000784819	0.00118076	0.0029611	3	0.00164222	0.000946488	642740	213570	293190	0.0051613	0.00246938	0.00413608	3	0.00392226	0.00110933
P161_RS0104870	P161_RS0104870	942	hypothetical protein			4	4	4	1	1	0	0	1	0	3	1	1	14.3	24.341	11786000	507200	69442	0	0	0	0	3749200	3862800	3597000	9	104720	56355	7715.8	0	0.000477614	9.80581e-05	0	2	0.000287836	0.000205965	0	0	0	0	0	0	0	0	0
P161_RS0104875	P161_RS0104875	943	chloride channel protein			5	5	5	0	1	1	0	0	1	1	2	3	9.1	65.506	7515400	0	0	0	0	0	340480	776700	3327000	3071200	19	388130	0	0	0	0	0	0	0	0	0	0	0	17920	0	0	0.000252801	1	0	0
P161_RS0104880	P161_RS0104880	944	hypothetical protein			7	7	7	3	2	2	1	3	1	6	5	2	33.5	25.317	47801000	1098400	1186200	1207000	1354900	2021600	487370	19142000	15692000	5612400	13	2628400	84494	91245	92846	0.000716094	0.00115961	0.00130426	3	0.00105999	0.000250239	104220	124700	37490	0.000836903	0.00144183	0.000528878	3	0.00093587	0.000379224
P161_RS0104895	P161_RS0104895	947	hypothetical protein			10	10	10	3	4	4	3	4	3	5	2	2	56.2	23.688	40799000	1822500	1076500	1575500	904870	2829700	694630	8577900	6821700	16496000	11	956580	88478	49928	22532	0.000749859	0.000634522	0.000316521	3	0.000566967	0.000183245	82261	184840	63148	0.000660569	0.00213719	0.00089084	3	0.00122953	0.00064866
P161_RS0104900	P161_RS0104900	948	N-6 DNA methylase			61	61	61	27	29	24	34	35	34	27	24	29	58.6	117.03	619380000	46307000	21308000	18930000	63017000	42858000	100910000	127500000	84661000	113890000	64	7481500	640550	291600	265290	0.00542872	0.00370587	0.00372669	3	0.00428709	0.000807297	870930	496530	786850	0.00699371	0.00574107	0.0111002	3	0.007945	0.00228894
P161_RS0104905	P161_RS0104905	949	aspartate--tRNA ligase			50	50	50	38	35	42	33	32	32	37	35	38	72.9	66.17	2.0963e+09	253380000	95814000	217390000	116710000	109660000	75918000	552330000	377330000	297760000	35	25172000	3044800	1784600	2654400	0.025805	0.02268	0.037288	3	0.028591	0.00628063	1851400	1742500	1219800	0.014867	0.0201475	0.0172079	3	0.0174075	0.00216034
P161_RS0104910	P161_RS0104910	950	cupin domain-containing protein			5	5	5	3	5	4	3	1	1	2	2	1	39.5	13.714	80862000	2963000	12461000	1490700	7021500	613260	1042700	16091000	38319000	860150	9	8984700	329230	1384500	165630	0.00279025	0.0175953	0.00232671	3	0.00757074	0.00709093	780170	68140	115850	0.00626489	0.000787861	0.00163432	3	0.00289569	0.00240732
P161_RS0104920	P161_RS0104920	952	hypothetical protein			6	6	6	5	3	1	0	0	0	0	1	1	30.4	24.629	12775000	10393000	1308500	226770	0	0	0	0	846900	0	9	379850	115160	145390	25197	0.000975992	0.00184772	0.000353958	3	0.00105922	0.000612661	0	0	0	0	0	0	0	0	0
P161_RS0104925	P161_RS0104925	953	molecular chaperone DnaK			14	14	14	9	6	5	12	9	9	10	10	13	78.4	14.249	858070000	40196000	13027000	8572700	69691000	70499000	24165000	145630000	275340000	210950000	6	49441000	3394300	1819200	1127200	0.028767	0.0231197	0.0158345	3	0.0225737	0.00529378	5943700	5713300	2583000	0.0477289	0.0660594	0.0364388	3	0.0500757	0.0122059
P161_RS0104930	P161_RS0104930	954	isoleucine--tRNA ligase			81	81	81	59	64	59	45	48	57	44	56	56	73	132.92	4911300000	424810000	365280000	477140000	447270000	232880000	438630000	617190000	728770000	1179300000	58	38402000	4085800	2908600	3808100	0.0346275	0.0369646	0.0534947	3	0.0416956	0.00839759	3122500	1794400	3004400	0.0250742	0.0207476	0.0423836	3	0.0294018	0.00934793
P161_RS0104935	P161_RS0104935	955	PIN domain-containing protein			5	5	5	3	2	1	2	2	1	3	2	3	43.3	15.614	35378000	2165800	340920	453830	879910	3594800	502360	9171600	12441000	5827400	7	2142700	309400	48703	64832	0.00262219	0.000618954	0.000910735	3	0.00138396	0.000883629	125700	182380	71765	0.00100939	0.00210875	0.0010124	3	0.00137685	0.000517534
P161_RS18065	P161_RS18065	957	NAD(P)/FAD-dependent oxidoreductase			13	13	13	8	5	8	7	7	7	9	6	9	34.3	46.909	120330000	11841000	3938000	3911500	19367000	6402700	8659900	26812000	17788000	21606000	21	3526800	339370	160060	172000	0.00287619	0.00203416	0.00241619	3	0.00244218	0.000344249	458950	251540	311090	0.00368544	0.0029084	0.0043886	3	0.00366082	0.000604538
P161_RS0104950	P161_RS0104950	958	DnaJ domain-containing protein			11	11	11	8	5	6	7	5	5	9	7	7	37.7	29.268	211660000	19198000	11394000	14064000	16634000	6552400	11123000	50601000	36509000	45579000	13	4312400	471340	481610	338860	0.00399465	0.00612066	0.00476017	3	0.00495849	0.000879195	372010	249670	103040	0.0029873	0.00288678	0.0014536	3	0.00244256	0.000700502
P161_RS0104955	P161_RS0104955	959	hypothetical protein			2	2	2	1	2	1	2	1	1	0	2	2	14.5	14.016	5344800	899230	848590	305480	752330	573440	243130	0	0	1722600	5	1069000	179850	169720	61096	0.00152425	0.00215693	0.000858253	3	0.00151314	0.00053024	150470	114690	48625	0.0012083	0.00132609	0.000685961	3	0.00107345	0.000278184
P161_RS0104960	P161_RS0104960	960	BrxA/BrxB family bacilliredoxin			11	11	11	6	3	5	8	9	8	8	9	9	93.4	14.621	1.7517e+09	32441000	10860000	8603300	142180000	125710000	65037000	416180000	523720000	426970000	8	102560000	1447800	412800	555250	0.0122702	0.00524617	0.00779994	3	0.00843878	0.00290293	8732200	8082500	4733600	0.0701209	0.093453	0.0667777	3	0.0767839	0.0118656
P161_RS0104970	P161_RS0104970	962	HD domain-containing protein			9	9	9	7	4	6	4	6	2	7	7	8	42.9	25.113	68234000	7753700	3835700	4641300	4607000	4206500	1593000	19919000	10848000	10830000	13	3606000	406070	295050	265490	0.00344148	0.00374971	0.0037295	3	0.00364023	0.00014078	334290	234930	75331	0.0026844	0.00271635	0.00106271	3	0.00215449	0.000772115
P161_RS0104980	P161_RS0104980	964	AraC family transcriptional regulator	TR|AraC		5	5	5	1	1	2	2	1	3	3	5	2	15.9	33.246	166720000	12819000	3760100	3052600	7012000	4484100	7337700	47047000	65291000	15916000	9	18524000	1424400	417790	339180	0.0120719	0.00530959	0.00476467	3	0.00738206	0.00332369	779110	498230	815300	0.00625638	0.00576073	0.0115016	3	0.00783956	0.00259733
P161_RS0104985	P161_RS0104985	965	hypothetical protein			6	6	6	0	0	0	3	6	2	0	0	0	28.5	22.15	24968000	0	0	0	9437500	14131000	1399200	0	0	0	11	1552800	0	0	0	0	0	0	0	0	0	622100	842690	87985	0.00499556	0.00974351	0.00124122	3	0.00532676	0.00347894
P161_RS0105000	P161_RS0105000	967	2-oxoglutarate dehydrogenase E1 component			50	50	50	41	37	35	37	29	38	31	40	39	53.8	104.55	2706900000	279000000	155680000	130470000	233100000	145480000	214500000	502850000	465650000	580150000	45	41018000	4709600	2512500	2226300	0.0399143	0.0319307	0.0312742	3	0.0343731	0.00392739	3016500	2316800	3253700	0.024223	0.0267877	0.0459005	3	0.0323037	0.00967121
P161_RS0105005	P161_RS0105005	968	peptidoglycan DD-metalloendopeptidase family protein			14	14	14	9	11	7	6	7	10	6	9	7	41.4	36.439	217800000	14984000	22953000	13926000	17790000	5450800	17945000	51158000	35350000	38241000	20	7493900	541940	938460	560810	0.00459299	0.0119266	0.00787804	3	0.00813256	0.00299936	557450	171930	646470	0.00447641	0.00198792	0.00911986	3	0.00519473	0.00295558
P161_RS0105010	P161_RS0105010	969	2-oxoglutarate dehydrogenase complex dihydrolipoyllysine-residue succinyltransferase			27	27	27	20	17	19	22	17	16	17	19	16	53.4	44.284	3.1771e+09	293780000	124470000	277720000	242430000	179400000	122360000	527530000	591520000	817850000	18	114740000	11421000	5259400	11219000	0.096794	0.0668404	0.1576	3	0.107078	0.0377594	10051000	8264200	4447600	0.0807111	0.0955539	0.0627431	3	0.0796694	0.0134152
P161_RS0105015	P161_RS0105015	970	hypothetical protein			6	6	6	3	4	3	2	4	5	3	2	3	30.9	21.488	54438000	13625000	3680500	4081000	1827900	4662700	2242300	8065400	9919500	6334100	6	8261800	2100000	500610	610020	0.0177977	0.00636212	0.00856932	3	0.0109097	0.00495319	304650	650250	285440	0.00244639	0.00751844	0.00402675	3	0.00466386	0.0021191
P161_RS0105030	P161_RS0105030	973	AAA family ATPase	ODP|Unclassified		26	26	26	8	11	4	14	14	13	13	11	9	33	91.067	191000000	8909500	6453900	2721800	23007000	12015000	23964000	66595000	25258000	22073000	43	3218000	189040	114830	63298	0.00160213	0.00145934	0.000889186	3	0.00131689	0.000307997	362070	242200	451390	0.00290748	0.00280041	0.00636784	3	0.00402524	0.00165704
P161_RS0105035	P161_RS0105035	974	molybdopterin molybdotransferase MoeA			7	7	7	5	5	3	5	5	5	5	3	3	25.8	44.674	101920000	10138000	4640800	4288400	16780000	4675300	14173000	28425000	11043000	7752700	18	2358200	219160	125130	133530	0.0018574	0.00159025	0.00187578	3	0.00177447	0.000130486	380480	98309	485190	0.00305531	0.00113669	0.00684466	3	0.00367889	0.00237162
P161_RS0105045	P161_RS0105045	975	cyclic pyranopterin monophosphate synthase MoaC			5	5	5	2	1	1	2	5	3	2	0	2	40.3	17.443	29547000	2476700	783120	174910	1767100	11622000	3206000	4955000	0	4561900	6	2870200	217970	130520	29151	0.00184732	0.00165875	0.000409502	3	0.00130519	0.000638007	64179	634760	402050	0.000515368	0.00733934	0.00567179	3	0.00450883	0.00290471
P161_RS0105050	P161_RS0105050	976	NTP transferase domain-containing protein			12	12	12	7	6	5	8	6	9	6	9	6	39.4	42.228	182840000	14964000	7901200	1881700	23235000	9539600	23679000	43809000	41724000	16103000	18	5212400	499380	219720	38697	0.00423229	0.00279237	0.0005436	3	0.00252275	0.00151792	762980	287190	844950	0.00612685	0.0033206	0.0119199	3	0.00712244	0.00358052
P161_RS0105055	P161_RS0105055	977	molybdopterin biosynthesis protein MoeB			13	13	13	3	2	3	7	3	7	8	5	2	39.4	40.369	49847000	1516800	1324400	1816700	10456000	1277100	3859600	17712000	8218700	3666200	21	1799000	72226	63066	86510	0.000612122	0.00080149	0.00121526	3	0.00087629	0.000251846	497880	60814	93353	0.00399806	0.000703155	0.00131695	3	0.00200605	0.00143067
P161_RS0105060	P161_RS0105060	978	hypothetical protein			8	8	8	2	0	3	3	1	0	0	3	1	16.6	68.018	11344000	2076900	0	1626800	1198600	933650	0	0	2677700	2829900	24	194730	40967	0	3166.8	0.000347199	0	4.4486e-05	2	0.000195843	0.000154259	49943	38902	0	0.00040105	0.0004498	0	2	0.000425425	0.000201532
P161_RS0105070	P161_RS0105070	980	acyl-ACP desaturase			31	31	31	20	21	22	20	20	21	28	24	21	57.7	38.206	2281800000	134290000	133750000	98142000	247140000	68923000	69624000	654620000	538420000	336870000	18	47387000	2544200	3845900	2219700	0.0215623	0.0488766	0.0311815	3	0.0338735	0.0113123	6175400	1775400	1793500	0.0495894	0.0205279	0.0253012	3	0.0318062	0.0127248
P161_RS0105075	P161_RS0105075	981	1-acyl-sn-glycerol-3-phosphate acyltransferase			15	15	15	11	9	7	6	8	7	9	8	9	57	27.443	304270000	22610000	24331000	4186600	23160000	16434000	5469400	61094000	98565000	48423000	11	21426000	1623100	1983800	307860	0.0137559	0.0252116	0.0043247	3	0.0144307	0.00854038	1498600	1064400	367810	0.012034	0.012307	0.00518876	3	0.00984325	0.00329311
P161_RS0105085	P161_RS0105085	983	hypothetical protein			36	36	36	23	24	24	26	26	24	28	29	25	67.8	61.409	14709000000	1.0705e+09	733080000	1413300000	1.0541e+09	1092500000	1179200000	3.9094e+09	2388700000	1.8681e+09	20	237060000	19593000	13576000	22530000	0.166052	0.172534	0.316493	3	0.21836	0.0694409	19589000	22733000	20942000	0.157303	0.262848	0.295432	3	0.238528	0.0589551
P161_RS0105090	P161_RS0105090	984	TonB-dependent receptor plug domain-containing protein	putative SusC-like		61	61	61	51	50	47	54	52	49	51	56	50	75.1	92.733	26622000000	2464500000	1341200000	1.4627e+09	3.1436e+09	2333700000	1.9015e+09	4907200000	4.2047e+09	4862500000	38	343890000	34627000	20733000	17314000	0.293467	0.26349	0.24322	3	0.266726	0.0206403	42271000	28166000	28530000	0.339443	0.325666	0.402478	3	0.355862	0.0334384
P161_RS0105095	P161_RS0105095	985	glucose-6-phosphate isomerase			31	31	31	24	17	22	18	20	17	21	23	24	62.8	58.848	3.706e+09	341920000	87770000	303720000	216430000	199770000	88332000	758830000	545510000	1163700000	26	59069000	6030400	1657000	5421500	0.0511082	0.0210584	0.0761591	3	0.0494419	0.0225256	5079100	4540200	1779000	0.040786	0.0524956	0.0250967	3	0.0394594	0.0112248
P161_RS0105100	P161_RS0105100	986	peptidoglycan DD-metalloendopeptidase family protein			9	9	9	5	4	6	4	3	2	5	5	4	24.3	47.21	87744000	7419600	2626200	8214300	2878800	2852900	361740	15141000	15800000	32449000	21	2458700	353310	125060	313040	0.00299433	0.00158936	0.00439746	3	0.00299372	0.00114641	137080	122110	17226	0.00110077	0.00141188	0.00024301	3	0.000918556	0.00049428
P161_RS0105105	P161_RS0105105	987	DUF3108 domain-containing protein			17	17	17	9	7	9	11	7	7	12	13	10	53.9	29.816	222190000	14293000	15509000	9229000	46269000	4417100	8514800	46437000	43232000	34284000	16	9051600	646930	720920	412440	0.00548279	0.00916199	0.0057938	3	0.00681286	0.00166593	2395300	229070	393520	0.0192346	0.0026486	0.00555145	3	0.0091449	0.00723228
P161_RS0105110	P161_RS0105110	988	tryptophan 2,3-dioxygenase			16	16	16	7	10	8	9	6	8	10	10	7	38.7	36.098	250720000	17773000	19134000	12248000	23513000	8441900	28405000	57641000	45246000	38320000	17	11940000	761460	973260	658780	0.00645344	0.0123689	0.00925428	3	0.00935888	0.00241611	1226700	462450	769060	0.0098506	0.00534703	0.0108493	3	0.00868229	0.00239337
P161_RS0105115	P161_RS0105115	989	4-hydroxyphenylpyruvate dioxygenase			38	38	38	30	31	31	27	27	29	29	32	28	80.6	44.03	7.1699e+09	714790000	372960000	241870000	956590000	286460000	623050000	1.6231e+09	1369800000	981270000	27	148310000	11065000	7091000	4831200	0.0937769	0.0901177	0.0678668	3	0.0839205	0.0114495	23126000	6700400	13283000	0.185705	0.0774726	0.187386	3	0.150188	0.051422
P161_RS0105120	P161_RS0105120	990	four helix bundle protein			2	2	2	1	1	0	1	0	2	2	1	1	20.2	13.894	5527800	0	0	0	0	0	421430	2926800	2179600	0	5	1105600	0	0	0	0	0	0	0	0	0	0	0	84287	0	0	0.00118905	1	0	0
P161_RS0105125	P161_RS0105125	991	homogentisate 1,2-dioxygenase			20	20	20	15	16	10	15	14	18	14	13	14	47.3	44.583	984610000	107450000	73558000	28553000	119550000	58598000	151000000	179620000	129580000	136690000	17	25538000	3267500	2352900	1210900	0.0276924	0.0299024	0.0170103	3	0.0248683	0.00562928	3107200	2187700	3584000	0.0249513	0.025295	0.0505601	3	0.0336022	0.0119919
P161_RS0105130	P161_RS0105130	992	hypothetical protein			7	7	7	2	0	0	1	0	1	2	6	6	31.3	26.774	34011000	288960	0	0	321880	0	89283	359690	13593000	19358000	11	3091900	26270	0	0	0.000222641	0	0	1	0	0	29261	0	8116.6	0.00023497	0	0.000114502	2	0.000174736	9.59366e-05
P161_RS0105135	P161_RS0105135	993	ferritin			5	5	5	4	3	2	3	4	3	5	4	5	42.3	19.513	198040000	15246000	1791800	1674100	29770000	26664000	11735000	58142000	32521000	20494000	4	32117000	2810700	447960	264600	0.0238209	0.00569301	0.003717	3	0.011077	0.00904738	5692200	4790300	2267200	0.0457093	0.0553873	0.0319838	3	0.0443601	0.00960196
P161_RS0105160	P161_RS0105160	997	NAD(P)/FAD-dependent oxidoreductase			28	19	19	17	16	16	10	9	11	10	11	12	76.4	38.501	1252100000	258240000	110500000	67871000	135700000	53278000	98950000	169750000	135780000	221980000	18	22785000	4427800	1800500	1524300	0.037526	0.0228821	0.0214128	3	0.0272736	0.00727431	2691500	846540	2147500	0.0216132	0.00978803	0.0302952	3	0.0205654	0.00840471
P161_RS0105170;REV__P161_RS0105210	P161_RS0105170	999	Mrp/NBP35 family ATP-binding protein			47	47	47	40	39	36	29	21	28	32	26	32	79.9	41.107	8787300000	1.7688e+09	871760000	642340000	919770000	232910000	660910000	1340900000	1223200000	1126700000	22	235000000	47728000	23399000	20412000	0.404499	0.297372	0.28674	3	0.329537	0.0531837	21690000	7746100	16615000	0.174174	0.0895634	0.234391	3	0.166043	0.0594044
P161_RS0105180	P161_RS0105180	1001	tRNA (guanosine(46)-N7)-methyltransferase TrmB			16	16	16	11	11	12	9	11	8	13	13	16	69.9	26.394	569500000	36672000	67371000	30986000	34870000	34597000	20867000	111560000	118720000	113860000	14	32458000	2332300	3983900	1741700	0.0197665	0.0506304	0.0244667	3	0.0316212	0.0135778	2451300	2320200	519490	0.0196843	0.0268271	0.00732853	3	0.0179466	0.00805451
P161_RS0105185	P161_RS0105185	1002	hypothetical protein			3	3	3	2	3	1	2	1	1	2	1	2	15.1	8.5739	29163000	1986500	1980600	339890	4088000	2347200	592900	6310800	4785400	6731500	3	9720900	662170	660190	113300	0.00561195	0.00839019	0.00159159	3	0.00519791	0.00279091	1362700	782420	197630	0.0109427	0.00904665	0.002788	3	0.00759245	0.00348433
P161_RS0105200	P161_RS0105200	1005	uracil phosphoribosyltransferase			10	10	10	6	6	7	4	9	5	10	9	10	56.2	24.309	218500000	15435000	14455000	12340000	5394300	12423000	2287900	67852000	42790000	45524000	11	12712000	1050700	1018700	856160	0.00890478	0.0129464	0.012027	3	0.0112927	0.00172975	395170	644530	196030	0.00317328	0.00745231	0.00276543	3	0.00446367	0.00211983
P161_RS0105210	P161_RS0105210	1007	YicC family protein			24	24	24	16	16	18	14	12	16	17	16	13	69	32.969	1.0648e+09	93571000	87788000	82736000	67735000	27109000	51925000	223290000	204270000	226360000	20	31011000	3564300	3891500	2553600	0.0302078	0.0494561	0.035872	3	0.0385119	0.00807677	2395700	1100300	2151700	0.0192379	0.0127221	0.0303544	3	0.0207715	0.00727958
P161_RS0105215	P161_RS0105215	1008	guanylate kinase			16	16	16	10	7	8	7	7	7	6	13	9	74.2	22.552	358300000	34822000	15546000	9763400	25693000	21554000	10374000	63315000	108030000	69200000	12	21969000	2231400	1105900	706110	0.0189113	0.0140546	0.00991916	3	0.014295	0.00367497	1719100	1588500	686700	0.0138046	0.0183669	0.0096874	3	0.013953	0.00354493
P161_RS0105220	P161_RS0105220	1009	nicotinate-nucleotide adenylyltransferase			3	3	3	3	1	1	1	0	1	1	1	0	16.5	23.274	9420400	1211400	235020	163020	1284100	0	467560	2279700	3779600	0	9	1046700	134600	26114	18114	0.00114075	0.000331876	0.000254458	3	0.000575694	0.000400801	142680	0	51951	0.00114574	0	0.000732882	2	0.000939312	0.000473791
P161_RS0105225	P161_RS0105225	1010	M23 family metallopeptidase			8	8	8	6	6	3	7	5	5	6	5	6	30.2	32.307	153640000	9103700	8878900	6320400	14160000	8570300	4205200	41580000	41552000	19268000	14	4478800	273140	380190	167700	0.00231489	0.00483174	0.00235578	3	0.00316747	0.00117693	394930	276730	152980	0.00317135	0.00319966	0.00215812	3	0.00284304	0.000484454
P161_RS0105230	P161_RS0105230	1011	GH3 auxin-responsive promoter family protein			24	24	24	11	10	13	11	14	12	10	14	11	40.6	56.724	407600000	30192000	14087000	43031000	17064000	19696000	15344000	90024000	66805000	111360000	23	12156000	1126100	472080	1253700	0.0095438	0.00599954	0.0176115	3	0.0110516	0.00485897	278960	623710	476760	0.00224009	0.00721158	0.00672574	3	0.00539247	0.00223787
P161_RS0105240	P161_RS0105240	1012	6-carboxytetrahydropterin synthase			10	10	10	7	6	4	5	7	5	7	6	6	74.5	17.09	258800000	22816000	21157000	10742000	10787000	21667000	5576100	54423000	61535000	50100000	9	2999900	755370	195450	20578	0.00640183	0.00248392	0.000289072	3	0.00305828	0.00252835	256600	394140	14717	0.00206054	0.0045572	0.000207615	3	0.00227512	0.00178218
P161_RS0105250	P161_RS0105250	1014	aminoacyl-tRNA hydrolase			7	7	7	5	3	4	5	5	3	4	2	3	42.6	23.591	164890000	27398000	11735000	7169000	17457000	17301000	4342800	42648000	16827000	20008000	11	13052000	2081500	1036900	625590	0.0176409	0.0131777	0.00878804	3	0.0132022	0.00361421	1373500	1321800	350430	0.0110294	0.0152832	0.00494358	3	0.0104187	0.00424315
P161_RS0105255	P161_RS0105255	1015	50S ribosomal protein L25/general stress protein Ctc			15	15	15	12	10	10	10	10	9	12	10	13	84.3	22.405	11778000000	1304900000	505120000	470420000	654090000	815730000	267290000	2278900000	3.3343e+09	2.1468e+09	9	473570000	39407000	22688000	20611000	0.333978	0.288336	0.289535	3	0.30395	0.0212388	35264000	40077000	12519000	0.283176	0.463386	0.176608	3	0.307723	0.118356
P161_RS0105260	P161_RS0105260	1016	ribose-phosphate pyrophosphokinase			27	27	27	21	20	21	20	17	15	21	22	22	70.6	34.529	2374700000	201180000	160870000	129390000	198380000	68821000	119170000	697830000	392840000	406220000	17	51355000	5111600	5024000	4227800	0.0433213	0.0638487	0.0593905	3	0.0555202	0.00881584	5530300	2517300	3504700	0.0444092	0.029106	0.0494414	3	0.0409855	0.00864766
P161_RS0105270	P161_RS0105270	1018	LysR family transcriptional regulator	OCS|LysR		7	7	7	0	1	1	2	3	3	1	5	3	32.9	33.865	15234000	0	0	0	2936200	534680	1009900	430470	5018900	5303600	15	462710	0	0	0	0	0	0	0	0	0	195750	35645	67328	0.0015719	0.000412141	0.000949808	3	0.000977951	0.000473889
P161_RS0105275	P161_RS0105275	1019	histidine ammonia-lyase			19	19	19	2	1	2	13	12	11	9	13	13	44.7	55.182	355170000	836190	411940	823950	27170000	30299000	14017000	85865000	74489000	121260000	20	13289000	41809	20597	41198	0.000354335	0.000261762	0.000578733	3	0.000398277	0.000133081	1137200	1178600	616550	0.0091319	0.0136274	0.00869778	3	0.0104857	0.0022286
P161_RS0105280	P161_RS0105280	1020	urocanate hydratase			29	29	29	4	5	7	18	17	15	18	24	19	37.7	74.737	394640000	1449200	4805200	6011300	23727000	26818000	20321000	152440000	99060000	60006000	28	7691400	51758	171610	181480	0.000438654	0.00218095	0.00254936	3	0.00172299	0.000920531	489790	693050	460970	0.00393309	0.00801331	0.00650298	3	0.0061498	0.00168436
P161_RS0105285	P161_RS0105285	1021	imidazolonepropionase			15	15	15	0	1	0	11	8	9	6	9	8	47.9	45.896	166800000	0	440710	0	33651000	4807500	29072000	21426000	40601000	36799000	21	2827400	0	20986	0	0	0.000266706	0	1	0	0	380880	175600	438850	0.00305853	0.00203036	0.00619093	3	0.00375994	0.00176948
P161_RS0105290	P161_RS0105290	1022	formimidoylglutamase			7	7	7	1	1	1	3	3	4	2	1	3	27.8	35.36	18488000	0	1291200	973520	3991200	1528400	3758700	1005300	956730	4983200	14	750690	0	92228	69537	0	0.0011721	0.000976829	2	0.00107447	0.000512743	146780	92088	159180	0.00117867	0.00106476	0.00224558	3	0.00149633	0.000531833
P161_RS0105295	P161_RS0105295	1023	bifunctional 4-hydroxy-2-oxoglutarate aldolase/2-dehydro-3-deoxy-phosphogluconate aldolase			23	23	23	22	20	18	9	6	5	10	12	12	80.2	23.971	2.949e+09	952010000	1136700000	678340000	7885100	3133400	1702900	39693000	60664000	68869000	13	155240000	55205000	59427000	30506000	0.467867	0.755242	0.428536	3	0.550549	0.145628	416410	192380	98532	0.00334384	0.00222437	0.00139001	3	0.00231941	0.000800474
P161_RS0105300	P161_RS0105300	1024	sugar kinase			29	29	29	28	26	26	5	7	4	11	9	6	69	37.824	3.76e+09	1194400000	1321400000	1075200000	6657200	3850000	6316900	54800000	57367000	40062000	16	189160000	58470000	66998000	53830000	0.495539	0.85146	0.756183	3	0.701061	0.150441	416070	213960	372630	0.00334111	0.00247389	0.00525676	3	0.00369058	0.00116267
P161_RS0105305	P161_RS0105305	1025	LacI family transcriptional regulator	OCS|LacI		9	9	9	6	4	3	2	6	4	5	3	5	25.1	38.186	80498000	11942000	4570400	6812600	1957000	3518000	1647100	23109000	14957000	11985000	14	2981500	671410	326450	268950	0.00569026	0.00414877	0.0037781	3	0.00453905	0.000827978	139790	151610	117650	0.00112254	0.00175297	0.00165971	3	0.00151174	0.00027783
P161_RS0105315	P161_RS0105315	1027	acetate--CoA ligase			27	27	27	13	12	14	15	12	12	20	21	20	41.7	71.658	753810000	41066000	22571000	34499000	52946000	40888000	60339000	261600000	141800000	98094000	31	13186000	853980	467160	788690	0.00723756	0.00593702	0.0110792	3	0.0080846	0.00218306	931750	997860	1116900	0.0074821	0.0115376	0.0157563	3	0.011592	0.00337815
P161_RS0105320	P161_RS0105320	1028	sugar MFS transporter			4	4	4	0	1	0	1	1	2	2	1	1	9.2	46.573	11850000	0	459590	0	165740	696230	1807600	5083000	1010900	2626800	8	1272000	0	57449	0	0	0.000730105	0	1	0	0	20717	87028	161730	0.000166361	0.00100625	0.00228155	3	0.00115139	0.000869601
P161_RS18075	P161_RS18075	1029	aminoglycoside phosphotransferase family protein			14	14	14	4	4	4	8	6	7	10	5	4	34.3	41.464	88625000	2631500	2153500	1522100	12566000	7256300	2300000	35902000	20289000	4004600	24	2373800	109650	52546	63422	0.000929294	0.000667794	0.000890928	3	0.000829338	0.000115298	243640	278300	80917	0.00195647	0.00321781	0.00114151	3	0.00210526	0.000854152
P161_RS0105330	P161_RS0105330	1030	nucleotide-diphospho-sugar transferase			18	18	18	11	14	13	10	10	10	13	11	8	51.6	34.934	194890000	8996300	8723600	13245000	24993000	10861000	15173000	48280000	43439000	21179000	15	10307000	501380	489770	659180	0.00424924	0.00622436	0.0092599	3	0.00657784	0.00206081	1475300	663270	987140	0.0118469	0.00766899	0.0139258	3	0.0111472	0.00260179
P161_RS0105335	P161_RS0105335	1031	hypothetical protein			26	26	26	16	18	15	23	18	18	20	21	17	66.6	37.208	1374200000	58735000	69245000	36028000	159660000	71741000	42142000	344080000	453680000	138850000	17	42730000	2232900	2700700	1541300	0.018924	0.0343225	0.0216516	3	0.024966	0.00670907	4097900	2471700	1842400	0.0329068	0.0285788	0.0259911	3	0.0291589	0.00285298
P161_RS0105345	P161_RS0105345	1033	DUF1800 domain-containing protein			3	3	3	0	0	0	1	1	0	1	2	0	6.3	55.263	4305600	0	0	0	0	184110	0	1573900	2547600	0	29	142120	0	0	0	0	0	0	0	0	0	0	6348.8	0	0	7.34073e-05	0	1	0	0
P161_RS0105350	P161_RS0105350	1034	response regulator transcription factor	RR|LytTR		29	29	27	16	16	15	12	16	14	19	18	17	77.2	26.794	400450000	21273000	20148000	17286000	27856000	27530000	13037000	87652000	99750000	85919000	15	18434000	1138400	1030400	926100	0.00964804	0.0130951	0.0130095	3	0.0119175	0.00160516	1238200	1496300	415910	0.00994294	0.0173008	0.00586731	3	0.011037	0.00473138
P161_RS0105365	P161_RS0105365	1037	AsnC family transcriptional regulator	TR|ArsR		8	8	8	3	3	4	4	5	5	6	4	3	55.7	16.786	133390000	5721800	5973300	3860600	12391000	5362400	7161000	37443000	43292000	12182000	7	15542000	817400	853330	551510	0.00692754	0.0108448	0.0077474	3	0.00850656	0.00168689	1770100	610730	749490	0.0142142	0.0070615	0.0105732	3	0.0106163	0.00292023
P161_RS0105370	P161_RS0105370	1038	acetyl-CoA carboxylase biotin carboxylase subunit			47	47	47	32	35	31	37	32	35	37	33	31	91.5	49.801	7.7516e+09	606880000	324470000	244160000	1094800000	352040000	959600000	1.8617e+09	955490000	1352500000	26	114810000	10504000	5811600	5285300	0.0890224	0.0738581	0.0742458	3	0.0790421	0.00705888	17197000	5432200	13980000	0.138095	0.0628092	0.197218	3	0.132707	0.0550043
P161_RS0105375	P161_RS0105375	1039	acetyl-CoA carboxylase biotin carboxyl carrier protein			14	14	14	10	9	10	12	13	10	10	12	11	79.1	16.88	2602900000	96101000	75539000	28877000	248730000	89109000	65420000	617700000	807480000	573950000	8	201600000	8018800	7046200	2808200	0.0679601	0.0895483	0.0394485	3	0.0656523	0.0205182	21267000	8092200	4779700	0.170777	0.0935652	0.0674281	3	0.11059	0.043876
P161_RS0105380	P161_RS0105380	1040	ketoacyl-ACP synthase III			31	31	31	18	18	18	20	21	21	27	21	21	86.7	36.225	2195300000	137590000	108410000	140050000	236130000	87344000	198600000	616620000	377030000	293470000	18	66575000	4092200	4086000	4818600	0.0346818	0.0519279	0.0676898	3	0.0514332	0.01348	5609600	3132200	5185100	0.045046	0.0362157	0.0731471	3	0.0514696	0.0157465
P161_RS0105385	P161_RS0105385	1041	50S ribosomal protein L32			5	5	5	4	3	4	3	3	3	5	4	3	57.6	7.7046	977060000	147230000	98115000	51947000	48981000	104320000	43644000	221240000	161010000	100580000	4	138610000	20808000	14966000	7988300	0.17635	0.190199	0.112217	3	0.159588	0.0339708	9158800	12072000	6863200	0.0735466	0.139581	0.0968203	3	0.103316	0.027347
P161_RS0105390	P161_RS0105390	1042	DUF177 domain-containing protein			8	8	8	6	6	5	4	5	7	6	6	5	24.7	20.647	218810000	12745000	15608000	8365100	25526000	6640100	13384000	39594000	44771000	52178000	4	26448000	2431900	2052200	1654200	0.0206106	0.0260809	0.0232376	3	0.0233097	0.00223383	1684400	865920	1391000	0.013526	0.0100121	0.0196231	3	0.0143871	0.00397062
P161_RS0105395	P161_RS0105395	1043	4-hydroxythreonine-4-phosphate dehydrogenase PdxA			23	23	23	17	14	15	16	16	17	20	21	19	76.3	37.684	1.0425e+09	55051000	31456000	27115000	98747000	45298000	42044000	362370000	247900000	132560000	22	28737000	1709100	894270	856190	0.0144848	0.011365	0.0120274	3	0.0126258	0.00134206	3030000	1488500	1200900	0.0243314	0.0172106	0.0169413	3	0.0194944	0.003422
P161_RS0105400	P161_RS0105400	1044	riboflavin synthase			10	10	10	6	6	4	6	7	5	7	7	5	52.6	21.44	277850000	23045000	13003000	8434200	37783000	17084000	7575500	53895000	78310000	38719000	11	16420000	1401400	924160	682220	0.011877	0.0117449	0.00958356	3	0.0110685	0.00105139	1670300	1233100	590440	0.0134128	0.0142576	0.00832944	3	0.0119999	0.00261825
P161_RS0105405	P161_RS0105405	1045	DNA polymerase III subunit delta'			13	13	13	8	8	7	7	6	6	12	8	5	35.5	43.304	136870000	6432300	5150100	6628400	10222000	6655000	4776500	45019000	38190000	13792000	25	3429400	213920	166770	150940	0.00181299	0.00211944	0.00212035	3	0.00201759	0.000144675	286090	143340	151810	0.00229735	0.00165735	0.00214161	3	0.0020321	0.000272509
P161_RS0105415	P161_RS0105415	1047	phosphoglycerate kinase			52	52	52	36	37	34	42	32	37	42	44	38	95.7	42.475	19771000000	1215600000	731910000	454170000	2552400000	759210000	2200700000	4386000000	3.3378e+09	4.1335e+09	28	313290000	18145000	12959000	8579400	0.153781	0.164693	0.12052	3	0.146331	0.0187869	43207000	13708000	40723000	0.346959	0.158497	0.574486	3	0.359981	0.170076
P161_RS0105420	P161_RS0105420	1048	aldo/keto reductase			26	26	26	19	16	16	19	19	20	22	19	17	66.5	38.821	1.9694e+09	181580000	96964000	85321000	193330000	81992000	135820000	526030000	380220000	288170000	17	53178000	6631900	4035000	3229700	0.056206	0.0512798	0.0453696	3	0.0509518	0.00443002	4277000	2970400	4151400	0.034345	0.0343449	0.0585645	3	0.0424181	0.0114172
P161_RS0105425	P161_RS0105425	1049	DUF695 domain-containing protein			10	10	10	5	6	7	5	4	5	6	9	4	28.4	43.188	106870000	9754500	7045800	4200500	16413000	3920900	9005000	27813000	18158000	10562000	16	5663900	609660	440360	233920	0.00516692	0.00559642	0.00328602	3	0.00468312	0.00100334	1025800	245050	499720	0.00823734	0.00283336	0.00704964	3	0.00604011	0.00231878
P161_RS0105435	P161_RS0105435	1051	N-acetyltransferase			6	6	6	2	2	1	6	3	4	3	3	3	32.8	20.799	164930000	11492000	778500	388150	26251000	11817000	5822400	40195000	34539000	33647000	5	7699300	421140	155700	77630	0.0035692	0.00197875	0.00109052	3	0.00221282	0.00102537	1065800	1052700	78545	0.00855854	0.0121717	0.00110805	3	0.00727944	0.0046064
P161_RS0105440	P161_RS0105440	1052	deoxyribose-phosphate aldolase			19	19	19	13	13	14	11	15	11	13	14	17	78.2	27.45	347720000	26833000	20548000	21487000	28820000	21720000	21845000	78805000	52622000	75041000	16	9600300	1123800	911240	748540	0.00952431	0.0115807	0.0105152	3	0.0105401	0.000839709	759920	688560	380410	0.00610228	0.0079614	0.00536651	3	0.00647673	0.00109195
P161_RS0105445	P161_RS0105445	1053	hypothetical protein			5	5	5	1	1	0	1	2	1	0	1	3	26.9	28.524	14579000	624180	440500	0	779450	338140	84922	0	2352100	9959500	10	170650	62418	44050	0	0.000528998	0.00055982	0	2	0.000544409	0.000256945	77945	33814	8492.2	0.000625911	0.000390971	0.000119801	3	0.000378894	0.000206795
P161_RS0105465	P161_RS0105465	1057	MarC family protein			2	2	2	2	2	1	0	1	2	1	0	0	9.3	21.086	8231700	3064800	591030	618300	0	1137500	859030	1961100	0	0	6	1372000	510790	98506	103050	0.00432899	0.00125189	0.00144761	3	0.00234283	0.0014067	0	189580	143170	0	0.002192	0.00201972	2	0.00210586	0.000995201
P161_RS0105470	P161_RS0105470	1058	NAD(P)/FAD-dependent oxidoreductase			6	6	6	3	0	2	2	4	1	3	2	3	33.3	22.25	41899000	1090100	0	1785400	429230	4318500	0	12790000	6050400	15436000	10	2465000	68622	0	178540	0.000581578	0	0.00250806	2	0.00154482	0.00107186	42923	377010	0	0.000344678	0.00435914	0	2	0.00235191	0.00197869
P161_RS0105475	P161_RS0105475	1059	energy transducer TonB			4	4	4	1	2	0	1	3	3	2	2	1	19.8	27.744	13738000	728840	970530	0	641140	579440	193580	5058900	4844300	721120	12	1028400	60737	80877	0	0.000514752	0.00102785	0	2	0.000771298	0.000419616	53428	48287	16132	0.000429035	0.000558313	0.000227577	3	0.000404975	0.00013609
P161_RS0105480	P161_RS0105480	1060	uroporphyrinogen-III synthase			23	23	23	16	16	14	15	16	16	20	18	20	62.1	28.637	2364400000	138800000	142130000	116350000	155480000	151390000	84917000	580940000	471080000	523320000	12	120260000	7119200	8262900	6588700	0.0603359	0.105011	0.0925555	3	0.0859675	0.0188241	9831600	9468200	3380400	0.0789493	0.109475	0.0476879	3	0.0787041	0.0252251
P161_RS0105490	P161_RS0105490	1062	polyprenol monophosphomannose synthase	CAZyme, single-domain, contains GT2 domain		17	17	17	13	9	9	4	13	6	11	12	11	65.7	27.423	84381000	5963900	7028200	5312300	1797000	6260600	1668000	18460000	20855000	17036000	15	4543200	319020	318130	311790	0.00270372	0.00404303	0.0043799	3	0.00370889	0.000723941	119800	309660	111200	0.000962013	0.00358041	0.00156872	3	0.00203705	0.00111908
P161_RS0105495	P161_RS0105495	1063	dihydroorotase			19	18	18	9	11	6	8	10	12	11	9	10	52.2	50.103	646380000	37558000	24823000	5600200	69239000	29151000	100100000	196340000	92266000	91310000	18	14511000	1205100	864080	250150	0.0102133	0.0109814	0.00351401	3	0.00823624	0.00335381	1032800	1140200	2543500	0.00829355	0.0131834	0.0358816	3	0.0191195	0.0120195
P161_RS18080	P161_RS18080	1064	DUF4296 domain-containing protein			8	8	8	4	3	3	3	3	3	4	3	6	36.9	18.752	83137000	4332200	4526400	4315400	5873000	4281500	1561900	13585000	16079000	28583000	9	7216000	421180	502930	41415	0.00356954	0.00639161	0.000581782	3	0.00351431	0.00237217	652560	381290	173540	0.00524016	0.00440862	0.00244816	3	0.00403231	0.00117048
P161_RS0105505	P161_RS0105505	1065	NAD-dependent epimerase/dehydratase family protein			12	12	12	6	7	5	7	3	5	7	6	5	36.6	37.581	123710000	6094000	5066000	7823000	15701000	1567200	4736100	24335000	35277000	23107000	21	5496300	282910	200770	372520	0.00239769	0.00255153	0.00523302	3	0.00339408	0.00130184	747660	74630	186630	0.00600383	0.000862901	0.00263282	3	0.00316652	0.00213243
P161_RS0105510	P161_RS0105510	1066	tyrosine--tRNA ligase			42	42	42	25	24	21	26	25	26	29	27	28	71.6	48.342	1.8708e+09	185620000	119020000	55865000	323720000	88390000	199760000	337860000	246140000	314420000	23	49126000	5140800	3542900	1945800	0.0435688	0.0450258	0.0273338	3	0.0386428	0.00801874	6817300	2670700	6075700	0.054744	0.0308797	0.0857109	3	0.0571115	0.0224473
P161_RS0105515	P161_RS0105515	1067	DUF4349 domain-containing protein			15	15	15	5	7	4	8	10	9	7	12	9	50.2	32.468	200010000	4707400	8298200	3492400	18501000	8547400	10808000	44187000	39612000	61852000	12	7693500	215950	420200	161600	0.0018302	0.00534021	0.00227009	3	0.00314683	0.00156132	987940	405980	382200	0.00793331	0.0046941	0.00539176	3	0.00600639	0.00139199
P161_RS0105520	P161_RS0105520	1068	hypothetical protein			6	6	6	1	0	1	2	1	0	3	2	1	21.2	34.507	9913200	0	0	544580	1924400	639310	0	5493300	834330	477280	14	535020	0	0	38899	0	0	0.000546438	1	0	0	137460	45665	0	0.00110383	0.000527997	0	2	0.000815911	0.000450776
P161_RS0105525	P161_RS0105525	1069	hypothetical protein			2	2	2	0	1	1	0	2	1	1	2	0	13.5	17.49	8882700	0	483230	236420	0	1315600	114310	3691900	3041300	0	7	1269000	0	69032	33774	0	0.00087731	0.000474444	2	0.000675877	0.000358557	0	187940	16329	0	0.00217304	0.000230356	2	0.0012017	0.000974631
P161_RS0105535	P161_RS0105535	1071	large conductance mechanosensitive channel protein MscL			8	8	8	2	4	4	5	2	2	3	3	1	44.7	17.088	33930000	2012500	2608600	4590400	2175200	3008300	1341100	3832400	8527900	5833400	9	1221900	223620	222290	457480	0.0018952	0.00282503	0.0064265	3	0.00371558	0.00195414	34679	38765	75346	0.000278478	0.000448216	0.00106292	3	0.000596538	0.000336983
P161_RS0105540	P161_RS0105540	1072	acyltransferase			15	15	15	5	9	3	8	5	5	9	12	6	55.2	36.963	84178000	3964400	12071000	7128200	8863400	1682700	2641400	18140000	17916000	11771000	18	2679200	131690	535020	396010	0.00111608	0.00679943	0.00556299	3	0.00449284	0.0024405	429650	75372	126500	0.00345016	0.000871481	0.00178456	3	0.0020354	0.00106758
P161_RS0105545	P161_RS0105545	1073	hypothetical protein			4	4	4	2	2	2	1	2	1	2	2	3	61.2	15.827	55905000	5585800	3585100	2497500	1525300	3652500	625900	7624500	14817000	15991000	6	2120000	156970	184770	115610	0.00133034	0.00234819	0.00162404	3	0.00176752	0.000427746	254220	186350	104320	0.00204143	0.00215465	0.00147166	3	0.00188925	0.000298874
P161_RS0105550	P161_RS0105550	1074	hypothetical protein			5	5	5	4	2	2	3	3	3	2	3	1	40.3	15.505	52400000	7088100	4465000	1634300	5880100	5500300	2671200	10301000	10489000	4371000	4	10287000	1115500	786690	208510	0.00945397	0.00999784	0.00292907	3	0.00746029	0.00321174	967350	1088400	478550	0.00776797	0.0125845	0.00675099	3	0.00903449	0.00254434
P161_RS0105565	P161_RS0105565	1077	hypothetical protein			7	7	7	4	3	2	4	5	6	4	7	6	50.9	13.073	142390000	3151500	1275300	808440	23152000	12035000	5830900	13599000	54698000	27836000	7	16274000	337910	128480	115490	0.00286382	0.00163282	0.00162236	3	0.00203967	0.00058278	3266600	1351600	701840	0.0262313	0.0156277	0.00990098	3	0.0172533	0.0067652
P161_RS0105570	P161_RS0105570	1078	aldehyde dehydrogenase family protein			41	41	41	32	27	32	33	31	27	26	26	29	68.4	55.324	5104000000	503700000	244270000	629550000	498130000	443430000	308630000	829500000	621800000	1.025e+09	22	128810000	16343000	6717900	18312000	0.138508	0.0853761	0.25724	3	0.160375	0.0718466	13290000	10734000	5999300	0.106721	0.124111	0.0846332	3	0.105155	0.0161546
P161_RS0105575	P161_RS0105575	1079	hypothetical protein			19	19	19	9	8	8	12	16	15	15	13	12	49.7	44.983	653480000	24390000	7080800	6910900	155340000	56608000	93926000	130760000	116030000	62434000	20	22532000	878880	312550	291520	0.00744859	0.00397212	0.00409516	3	0.00517196	0.00161061	5141000	2179400	3542200	0.041283	0.0251991	0.0499704	3	0.0388175	0.010262
P161_RS0105580	P161_RS0105580	1080	hypothetical protein			3	3	3	0	0	1	1	1	1	0	2	0	22.1	20.732	3179300	0	0	0	0	459560	875560	0	1844200	0	9	96256	0	0	0	0	0	0	0	0	0	0	51062	97285	0	0.000590399	0.00137242	2	0.000981408	0.000562104
P161_RS0105590	P161_RS0105590	1082	serine hydrolase			5	5	5	2	4	2	3	3	3	2	3	3	13.6	48.275	27189000	353830	965600	646240	3424000	2874400	2902000	3071700	6067000	6884600	25	1087600	14153	38624	25849	0.000119948	0.000490862	0.000363117	3	0.000324642	0.00015385	136960	114980	116080	0.00109981	0.00132944	0.00163756	3	0.0013556	0.000220314
P161_RS0105600	P161_RS0105600	1084	hypothetical protein			4	4	4	0	0	1	0	1	0	3	1	0	23.9	19.648	3603300	0	0	474760	0	306850	0	2202900	618770	0	10	312850	0	0	47476	0	0	0.000666924	1	0	0	0	30685	0	0	0.000354792	0	1	0	0
P161_RS0105605	P161_RS0105605	1085	SDR family NAD(P)-dependent oxidoreductase			18	18	18	13	12	12	11	9	14	15	12	11	73.3	27.716	993670000	93042000	72979000	63348000	92031000	51648000	20727000	279660000	156810000	163430000	15	36085000	3361800	3351500	2556500	0.0284916	0.0425934	0.0359127	3	0.0356659	0.00575968	3133100	2359200	720500	0.0251593	0.027278	0.0101642	3	0.0208672	0.0076174
P161_RS0105610	P161_RS0105610	1086	hypothetical protein			2	2	2	2	2	1	2	2	2	2	2	1	12.9	35.659	173920000	9708600	8425800	3287400	46308000	11971000	12785000	28342000	34484000	18606000	6	16144000	1135500	870010	547900	0.00962347	0.0110567	0.00769669	3	0.00945896	0.00137666	3319900	1636000	1652600	0.0266593	0.0189161	0.0233135	3	0.022963	0.00317087
P161_RS0105615	P161_RS0105615	1087	hypothetical protein			4	4	4	1	1	2	3	3	2	1	3	3	13.1	18.472	27774000	1210700	478210	897150	4972400	3737600	1124100	1856700	5907900	7589800	9	1844400	134520	53135	99683	0.00114007	0.000675279	0.00140031	3	0.00107189	0.000299893	288410	245810	124900	0.00231598	0.00284215	0.00176199	3	0.00230671	0.000441024
P161_RS0105620	P161_RS0105620	1088	ATP synthase F1 subunit gamma			25	25	25	17	17	18	20	18	15	18	15	15	74.6	31.703	4.189e+09	320960000	358650000	382630000	402470000	99187000	275380000	694870000	800360000	854440000	15	82080000	6888800	7662900	10545000	0.0583832	0.0973858	0.148132	3	0.1013	0.0367442	11242000	3812100	4499200	0.090275	0.044077	0.063471	3	0.065941	0.018941
P161_RS0105625	P161_RS0105625	1089	F0F1 ATP synthase subunit alpha			62	62	62	48	44	49	47	39	41	44	49	45	85.3	56.413	32101000000	3.3992e+09	1108600000	3.2295e+09	1.8042e+09	1.47e+09	1.037e+09	5658000000	5758700000	8635900000	26	546170000	69160000	25358000	59217000	0.586137	0.322268	0.831857	3	0.580088	0.208083	32469000	30622000	20027000	0.260731	0.354064	0.282524	3	0.299106	0.0398661
P161_RS0105630	P161_RS0105630	1090	ATP synthase F1 subunit delta			16	16	16	14	12	13	12	13	10	12	13	13	87	20.542	2.9654e+09	532770000	322940000	218480000	252950000	122980000	98365000	512980000	538790000	365120000	10	130000000	25566000	16096000	11412000	0.216674	0.20456	0.160311	3	0.193848	0.0242246	10839000	7708800	8489200	0.0870389	0.0891322	0.119759	3	0.0986432	0.0149553
P161_RS0105635	P161_RS0105635	1091	F0F1 ATP synthase subunit B			31	31	31	23	17	22	26	21	21	24	22	19	74.1	18.531	3.5783e+09	414670000	349800000	245900000	481940000	252690000	136640000	601680000	650930000	444070000	8	139440000	17544000	17492000	11520000	0.148687	0.222301	0.161828	3	0.177606	0.0320568	10115000	11438000	4094700	0.0812251	0.132251	0.0577646	3	0.0904134	0.0310951
P161_RS0105645	P161_RS0105645	1093	F0F1 ATP synthase subunit A			8	8	8	5	7	6	5	6	7	7	8	6	19.1	42.267	701260000	59917000	67865000	74028000	53726000	24616000	37010000	171940000	134330000	77827000	12	48545000	4653900	5127700	5581700	0.0394422	0.0651666	0.0784095	3	0.0610061	0.0161781	4198900	1721000	2507800	0.0337178	0.0198989	0.035378	3	0.0296649	0.0069388
P161_RS0105650	P161_RS0105650	1094	hypothetical protein			2	2	2	0	0	0	0	0	0	0	2	1	17.1	15.037	8466300	0	0	0	0	0	0	0	8348100	118170	8	1058300	0	0	0	0	0	0	0	0	0	0	0	0	0	0	0	0	0	0
P161_RS0105665	P161_RS0105665	1097	tetratricopeptide repeat protein	*		28	28	28	18	14	16	16	16	18	13	18	19	41.3	85.244	522650000	45558000	20702000	20601000	45389000	23317000	49711000	74327000	97310000	145730000	40	6507600	695830	271110	286200	0.00589722	0.00344547	0.00402043	3	0.00445437	0.0010469	532830	360260	607900	0.00427871	0.00416547	0.00857575	3	0.00567331	0.00205286
P161_RS0105690	P161_RS0105690	1102	thioredoxin			4	4	4	1	0	0	1	1	0	0	0	2	39.7	13.744	12083000	1154100	0	0	5734600	177890	0	0	0	5016700	6	1468100	192360	0	0	0.00163027	0	0	1	0	0	955760	29649	0	0.0076749	0.000342813	0	2	0.00400886	0.00353995
P161_RS0105700	P161_RS0105700	1103	sialate O-acetylesterase	*		9	9	9	3	6	2	4	5	3	6	6	5	25.1	55.068	80136000	4570100	2670500	1763900	5270500	4932500	2964000	17216000	14757000	25991000	23	2324600	198700	53410	76691	0.001684	0.000678774	0.00107733	3	0.0011467	0.000413304	147740	164170	41019	0.00118638	0.0018982	0.000578662	3	0.00122108	0.000539257
P161_RS0105705	P161_RS0105705	1104	hypothetical protein	CAZyme, single-domain, contains GH35 domain		4	4	4	2	1	0	1	2	0	1	1	1	7	91.216	8520500	1814900	394450	0	425850	834450	0	2048600	1118800	1883400	41	150390	8440.8	9620.8	0	7.15366e-05	0.000122268	0	2	9.69024e-05	5.01561e-05	10387	8368.7	0	8.34093e-05	9.67622e-05	0	2	9.00857e-05	4.28153e-05
P161_RS0105710	P161_RS0105710	1105	T9SS type A sorting domain-containing protein			10	10	10	8	8	6	8	10	6	8	8	8	39.4	32.171	774570000	43756000	52142000	16696000	116850000	49491000	42088000	126610000	101740000	225190000	9	4266000	63083	144460	101440	0.000534634	0.00183591	0.00142499	3	0.00126518	0.000543128	562470	311090	337150	0.00451672	0.00359694	0.00475623	3	0.00428997	0.000499701
P161_RS0105720	P161_RS0105720	1106	T9SS type A sorting domain-containing protein			11	11	11	2	3	2	7	7	5	6	5	4	16	99.496	49386000	1267100	1275800	651700	5018900	4609600	5037200	15565000	7569600	8390700	35	1118200	36204	36453	18620	0.000306832	0.000463272	0.000261567	3	0.00034389	8.64146e-05	98085	102560	98270	0.000787638	0.00118584	0.00138631	3	0.00111993	0.000248811
P161_RS0105725	P161_RS0105725	1107	DUF5013 domain-containing protein			9	9	9	4	4	4	4	6	5	5	6	6	21.4	48.063	174550000	7810600	2691100	9039300	8280300	8940000	5118000	38208000	43759000	50705000	11	9036500	507510	244650	539130	0.00430119	0.00310919	0.00757349	3	0.00499463	0.00188735	752750	771990	254700	0.0060447	0.00892605	0.0035931	3	0.00618795	0.00217952
P161_RS0105730	P161_RS0105730	1108	DUF4959 domain-containing protein	*		11	11	11	5	5	5	11	8	10	9	10	8	33.4	45.559	402480000	17469000	10515000	8666900	106990000	19516000	37194000	62199000	77164000	62764000	19	11501000	816140	516940	456160	0.00691686	0.00656966	0.00640796	3	0.00663149	0.00021231	1415100	697990	1305500	0.0113635	0.00807043	0.0184169	3	0.0126169	0.00431592
P161_RS0105735	P161_RS0105735	1109	RagB/SusD family nutrient uptake outer membrane protein	SusD-like	xylose-cont.	29	29	29	9	9	13	19	18	13	20	19	19	57.9	73.888	445150000	8418000	7507900	14167000	40904000	23722000	15897000	199850000	80188000	54487000	30	5806700	195170	144390	249190	0.00165408	0.00183502	0.00350052	3	0.00232987	0.000831063	325480	341900	251130	0.00261366	0.00395318	0.00354273	3	0.00336986	0.000560355
P161_RS18090	P161_RS18090	1110	TonB-dependent receptor	SusC-like	xylose-cont.	43	43	43	22	21	18	27	30	25	21	28	23	43.7	116.39	571660000	36617000	21470000	14475000	75617000	43190000	41494000	106430000	100490000	131870000	57	8289700	601850	353430	231540	0.00510073	0.00449165	0.00325258	3	0.00428166	0.000768977	1094600	677380	670610	0.00878981	0.00783213	0.00946041	3	0.00869412	0.000668177
P161_RS18095	P161_RS18095	1111	sulfatase-like hydrolase/transferase	Sulfatase|S1_19	xylose-cont.	11	11	10	6	6	4	7	6	4	5	4	4	24.8	53.457	142520000	9897300	3681200	4070500	20392000	21674000	22475000	18393000	25426000	16509000	22	5283700	414900	142430	185020	0.00351632	0.00181011	0.00259909	3	0.00264184	0.000697213	509980	899850	994000	0.00409522	0.0104044	0.0140225	3	0.00950739	0.00410214
P161_RS0105750	P161_RS0105750	1112	family 43 glycosylhydrolase	CAZyme, single-domain, contains GH43_24 domain *	xylose-cont.	15	15	15	7	6	4	9	7	6	10	9	4	41.4	43.793	113960000	3847600	7208400	5864800	16647000	6936600	6753500	35365000	29026000	2307600	20	3214700	160970	227290	100860	0.00136424	0.00288857	0.00141684	3	0.00188988	0.000706505	416090	163510	142630	0.00334127	0.00189057	0.00201211	3	0.00241465	0.000657096
P161_RS0105760	P161_RS0105760	1114	family 16 glycosylhydrolase	*	xylose-cont.	7	7	7	0	1	1	4	3	0	5	3	3	11.3	78.744	7293800	0	108870	27343	1810200	638590	0	3081500	509940	1117400	32	200540	0	3402.3	854.48	0	4.3239e-05	1.20034e-05	2	2.76212e-05	1.8225e-05	29178	19956	0	0.000234304	0.000230739	0	2	0.000232522	0.000109621
P161_RS0105765	P161_RS0105765	1115	DUF4981 domain-containing protein	CAZyme, single-domain, contains GH2 domain	xylose-cont.	56	56	55	28	28	28	40	42	40	25	32	27	50.8	123.29	774740000	51107000	32318000	30972000	101620000	60572000	89208000	107180000	140960000	160810000	66	8510700	641850	406850	394780	0.00543974	0.00517055	0.00554572	3	0.00538534	0.000157917	966190	745650	1020900	0.00775866	0.0086215	0.014402	3	0.0102607	0.00294944
P161_RS19010	P161_RS19010	1116	family 43 glycosylhydrolase	CAZyme, multi-domain, contains a GH43_24 and a CBM32 domain	xylose-cont.	23	23	23	13	15	14	20	17	16	19	17	15	40.5	73.779	254120000	4036400	20073000	7599900	55956000	31077000	10028000	55561000	26250000	43533000	31	6432700	112740	570770	214550	0.000955482	0.00725377	0.00301391	3	0.00374106	0.00262217	1453500	781560	287020	0.0116718	0.0090367	0.00404904	3	0.00825253	0.00316101
P161_RS18105	P161_RS18105	1117	hypothetical protein	CAZyme, single-domain, contains GH2 domain	xylose-cont.	22	22	22	9	6	9	7	10	10	6	8	10	27.2	105.71	98611000	21503000	3567700	5321200	9783300	5361900	12647000	13929000	12014000	14483000	52	1653100	413520	48705	71891	0.00350462	0.000618979	0.0010099	3	0.00171117	0.00127817	188140	89589	217960	0.00151079	0.00103586	0.0030748	3	0.00187382	0.000871074
P161_RS0105780	P161_RS0105780	1118	T9SS type A sorting domain-containing protein	CAZyme, single-domain, contains GH30_5 domain	xylose-cont.	16	16	16	1	7	3	10	9	2	10	6	9	30.3	66.938	35556000	289740	1934600	1036900	6467000	3475800	656140	7901000	4817100	8977500	27	884210	10731	66811	38404	9.09462e-05	0.000849084	0.000539484	3	0.000493171	0.000311236	239520	118940	24302	0.00192338	0.00137523	0.000342832	3	0.00121382	0.000655274
P161_RS0105785	P161_RS0105785	1119	sulfatase	Sulfatase|S1_8	xylose-cont.	7	7	7	4	3	3	4	3	1	1	2	1	10.2	72.359	34037000	18524000	1002700	1823400	3266600	2368500	0	0	2324200	4727000	39	706320	474980	25711	46755	0.0040255	0.000326754	0.000656796	3	0.00166968	0.00167125	68914	60731	0	0.00055339	0.000702196	0	2	0.000627793	0.000302115
P161_RS0105790	P161_RS0105790	1120	sulfatase-like hydrolase/transferase	Sulfatase|S1_15	xylose-cont.	5	5	5	0	3	1	1	0	1	1	1	2	10.8	55.98	399910000	0	803460	124080	80532000	0	391590	0	311800000	6255200	29	12491	0	8212.2	4278.6	0	0.000104367	6.01041e-05	2	8.22354e-05	4.27708e-05	2777000	0	13503	0.0222997	0	0.000190489	2	0.0112451	0.0104676
P161_RS0105795	P161_RS0105795	1121	DUF5107 domain-containing protein		xylose-cont.	26	26	26	7	9	10	12	15	9	16	12	13	25.8	126.21	117000000	3575500	2115300	5909100	15733000	8084900	8065100	24486000	17845000	31186000	66	1513200	33771	11261	86952	0.000286212	0.000143113	0.00122147	3	0.000550264	0.000478194	229680	103610	83221	0.00184437	0.00119798	0.00117401	3	0.00140545	0.000310513
P161_RS0105800	P161_RS0105800	1122	beta-galactosidase	CAZyme, single-domain, contains GH2 domain	xylose-cont.	18	18	2	5	7	7	10	12	11	4	5	5	15.5	106.71	100130000	7632800	3369200	3447700	11853000	8183400	10306000	16708000	19670000	18963000	49	1522400	117870	68760	52790	0.000998959	0.000873853	0.000741573	3	0.000871462	0.000105091	179550	147960	142490	0.00144181	0.00171077	0.00201013	3	0.00172091	0.000232125
P161_RS0105815	P161_RS0105815	1125	sugar porter family MFS transporter		xylose-cont.	4	4	4	1	4	2	3	2	2	2	3	1	9.3	51.832	20146000	478490	2465000	1147200	2370500	816180	1479500	4898900	5171600	1318500	11	1413100	43500	99543	48885	0.000368667	0.00126507	0.000686717	3	0.000773483	0.000371061	180330	74198	134500	0.00144808	0.000857906	0.00189741	3	0.00140113	0.000425674
P161_RS0105820	P161_RS0105820	1126	sulfatase	Sulfatase|S1_16	xylose-cont.	8	8	8	5	2	1	3	3	3	5	5	3	16.5	59.798	56130000	3825200	554500	0	3297300	2142400	1102300	11599000	12145000	21463000	21	1913700	125330	26405	0	0.00106218	0.000335574	0	2	0.000698879	0.000443321	132630	102020	52492	0.00106504	0.0011796	0.000740514	3	0.00099505	0.000185961
P161_RS0105835	P161_RS0105835	1130	hypothetical protein	*		4	4	4	2	1	3	1	1	2	1	2	2	10.9	52.463	14185000	304150	345040	1498500	958800	1052600	1808000	3755500	3579300	882570	16	821340	19009	21565	28464	0.000161103	0.000274064	0.000399851	3	0.000278339	9.75154e-05	59925	65789	113000	0.000481207	0.000760678	0.00159411	3	0.000945332	0.00047273
P161_RS0105840	P161_RS0105840	1131	AraC family transcriptional regulator	OCS|AraC		13	13	13	5	3	3	10	8	9	8	9	5	38.5	34.764	104240000	2487400	1219700	1100600	18728000	8145100	9727600	28007000	20328000	14497000	15	6129000	165830	81313	73373	0.00140542	0.00103339	0.00103072	3	0.00115651	0.000176013	1045200	507700	608060	0.00839312	0.00587023	0.00857801	3	0.00761378	0.00123519
P161_RS18120	P161_RS18120	1132	hypothetical protein	CAZyme, single-domain, contains GH115 domain		14	14	14	0	0	0	2	6	4	3	4	4	16.3	98.176	15147000	0	0	0	1880400	2335400	1107700	3509400	3871000	2443700	44	175480	0	0	0	0	0	0	0	0	0	42736	53076	25174	0.000343177	0.000613685	0.000355134	3	0.000437332	0.000124796
P161_RS0105850	P161_RS0105850	1133	hypothetical protein	*		7	7	7	1	0	2	2	4	1	0	1	1	7.5	115.03	18533000	0	0	1829400	275980	13517000	930880	0	1260600	718930	55	304810	0	0	1106.8	0	0	1.55479e-05	1	0	0	5017.8	245770	16925	4.02937e-05	0.00284169	0.000238764	3	0.00104025	0.00127638
P161_RS0105855	P161_RS0105855	1134	hypothetical protein	*		15	15	15	7	12	7	11	10	6	11	6	6	26.9	63.058	670420000	37933000	7420400	1807300	19417000	6251200	1152000	11502000	172180000	412750000	25	1889700	46111	241080	59877	0.000390795	0.00306382	0.000841129	3	0.00143192	0.00116849	412950	202290	36783	0.00331605	0.00233896	0.000518904	3	0.00205797	0.00115909
P161_RS0105860	P161_RS0105860	1135	T9SS type A sorting domain-containing protein	*		26	26	26	5	11	3	17	18	15	18	17	21	38.6	97.26	289950000	6498300	3184600	500380	27976000	14793000	25778000	92340000	47709000	71172000	38	4551900	150920	77321	13168	0.00127906	0.000982653	0.000184979	3	0.000815564	0.000462019	530920	344680	483680	0.00426337	0.00398532	0.00682336	3	0.00502402	0.00127738
P161_RS0105865	P161_RS0105865	1136	T9SS type A sorting domain-containing protein			5	5	5	1	1	2	0	2	2	2	4	3	27	27.878	9791000	438160	209120	568900	0	974620	1286300	951790	2902100	2460000	10	536310	43816	20912	15785	0.000371345	0.000265765	0.000221742	3	0.000286284	6.27749e-05	0	24487	35026	0	0.000283128	0.000494118	2	0.000388623	0.000202438
P161_RS19020	P161_RS19020	1137	hypothetical protein	*		15	15	15	10	11	10	11	10	13	11	11	11	52.4	41.79	700880000	55824000	24711000	19090000	105840000	35239000	81015000	132820000	96539000	149810000	15	29690000	2943300	1154500	1004700	0.0249447	0.0146722	0.0141136	3	0.0179102	0.00497939	4116700	1884900	3516500	0.0330578	0.021794	0.0496079	3	0.0348199	0.0114231
P161_RS0105875	P161_RS0105875	1139	tyrosine-type recombinase/integrase			3	3	3	0	0	0	2	1	1	1	0	1	5.8	50.552	823880	0	0	0	593610	0	230260	0	0	0	20	41194	0	0	0	0	0	0	0	0	0	29681	0	11513	0.000238343	0	0.000162416	2	0.000200379	9.94157e-05
P161_RS0105880	P161_RS0105880	1140	hypothetical protein			10	10	10	1	2	0	6	4	5	7	2	3	42.3	33.573	25561000	0	73906	0	5103400	1297800	1691000	11921000	1528100	3946200	15	650590	0	4927.1	0	0	6.26172e-05	0	1	0	0	138990	63320	63767	0.00111611	0.000732131	0.000899572	3	0.000915938	0.000157186
P161_RS0105900	P161_RS0105900	1144	GIY-YIG nuclease family protein			4	4	4	1	3	3	3	2	2	3	2	2	13.4	39.496	1345000000	103260000	48323000	30323000	126270000	107550000	139230000	242860000	245840000	301320000	20	65615000	5163200	2365400	1507000	0.0437586	0.0300613	0.0211697	3	0.0316632	0.00929117	6176100	5308300	6961600	0.0495951	0.0613766	0.0982085	3	0.0697267	0.020706
P161_RS0105905	P161_RS0105905	1145	type I restriction-modification system subunit M			27	27	27	7	8	7	15	11	11	12	15	10	47.8	61.971	276610000	7738600	3942500	5377900	25755000	13659000	8901800	77962000	61246000	72031000	31	3124000	161640	111310	69842	0.00136991	0.00141461	0.000981113	3	0.00125521	0.000194674	287030	190090	175950	0.0023049	0.00219789	0.00248216	3	0.00232832	0.000117225
P161_RS19025	P161_RS19025	1146	restriction endonuclease subunit S			18	18	18	7	5	3	7	10	9	9	11	12	42.6	46.848	167650000	7406400	3419600	1210000	27328000	6467100	24855000	27648000	30589000	38729000	23	4244100	171240	83567	35442	0.00145127	0.00106203	0.000497875	3	0.00100373	0.000391401	676520	198530	609720	0.00543256	0.00229548	0.00860142	3	0.00544316	0.0025744
P161_RS0105920	P161_RS0105920	1147	type I restriction endonuclease subunit R			22	22	22	13	9	10	13	12	11	8	11	8	24	110.94	131930000	14464000	10385000	5149900	14739000	8370700	12112000	18006000	21324000	27379000	52	2154300	227700	115070	82397	0.00192978	0.0014624	0.00115748	3	0.00151655	0.000317606	221830	143220	207520	0.00178133	0.00165597	0.00292752	3	0.00212161	0.000572162
P161_RS0105925	P161_RS0105925	1148	hypothetical protein			4	4	4	3	4	4	3	2	3	4	3	2	32.7	19.284	47864000	4979500	3536700	1890000	4598000	2559500	3113300	14530000	9834500	2822500	7	1516500	711350	140130	95375	0.00602876	0.00178088	0.00133979	3	0.00304981	0.00211412	656860	210380	235760	0.00527469	0.0024325	0.00332591	3	0.0036777	0.00118669
P161_RS0105935	P161_RS0105935	1150	hypothetical protein			11	11	11	10	7	8	5	6	6	7	7	7	93	15.9	217560000	36929000	7395500	6644900	10560000	17079000	3608600	35731000	54494000	45117000	9	13821000	1770000	590630	540950	0.0150009	0.00750616	0.00759905	3	0.0100354	0.00351137	726980	1369300	325700	0.00583776	0.0158324	0.00459471	3	0.00875495	0.00503016
P161_RS0105940	P161_RS0105940	1151	hypothetical protein			2	2	2	0	1	0	0	1	1	2	0	0	14.8	15.962	3514900	0	0	0	0	643180	320640	2551000	0	0	8	80907	0	0	0	0	0	0	0	0	0	0	80397	40080	0	0.000929582	0.000565415	2	0.000747498	0.000382453
P161_RS0105955	P161_RS0105955	1154	polyprenyl synthetase family protein			23	23	23	17	20	16	14	10	11	18	13	13	51.7	37.144	738330000	65198000	48836000	90929000	58451000	21974000	19770000	237040000	126470000	69658000	18	25193000	1981300	2091200	2441400	0.0167917	0.0265765	0.0342958	3	0.025888	0.0071626	2240400	928960	741970	0.0179908	0.010741	0.0104671	3	0.0130663	0.00348393
P161_RS0105965	P161_RS0105965	1155	TetR/AcrR family transcriptional regulator	TR|TetR		9	9	9	4	2	2	6	3	7	4	3	0	46.8	23.579	34657000	2919500	1989200	392820	12476000	1728400	1284500	8277000	5589100	0	12	2888000	243290	165760	32735	0.00206191	0.0021066	0.000459849	3	0.00154278	0.000765969	1039700	144040	107040	0.00834896	0.00166545	0.00151003	3	0.00384148	0.0031879
P161_RS0105970	P161_RS0105970	1156	TolC family protein			14	14	14	10	10	11	6	4	7	8	7	7	29.5	52.765	573560000	74560000	51428000	107210000	31348000	17453000	15225000	80941000	59232000	136170000	14	20835000	2888300	1572000	3831300	0.0244786	0.0199781	0.0538206	3	0.0327591	0.0150056	1253900	708460	693860	0.010069	0.00819149	0.0097884	3	0.00934964	0.000826906
P161_RS0105975	P161_RS0105975	1157	efflux RND transporter periplasmic adaptor subunit			31	31	31	26	24	25	19	19	20	22	18	16	86.2	43.241	2604600000	405290000	233000000	167950000	523710000	95648000	212920000	433850000	281810000	250420000	21	59292000	9723900	5488400	3734600	0.0824109	0.0697507	0.0524622	3	0.0682079	0.0122751	8831100	2836600	6043700	0.0709151	0.0327979	0.0852595	3	0.0629908	0.0221382
P161_RS18140	P161_RS18140	1158	four helix bundle protein			7	7	7	4	5	4	3	2	2	2	3	1	48.5	15.379	22030000	3408900	3782900	2231500	853960	1728500	276180	3881500	4817600	1049300	8	1638600	343840	331840	242290	0.00291408	0.00421727	0.0034036	3	0.00351165	0.000537485	77947	125070	34522	0.000625927	0.00144611	0.000487008	3	0.000853014	0.000423198
P161_RS0105985	P161_RS0105985	1159	efflux RND transporter permease subunit			50	50	50	30	40	32	26	25	17	36	36	38	45	131.3	848100000	80884000	156540000	59024000	48148000	36331000	26977000	158220000	77241000	204740000	41	12814000	1207600	2304200	1133800	0.0102345	0.0292835	0.0159272	3	0.0184817	0.00798374	984540	650120	573310	0.00790601	0.00751694	0.00808778	3	0.00783691	0.000238112
P161_RS0106000	P161_RS0106000	1162	caspase family protein			13	13	13	0	1	0	6	5	6	6	5	3	16.2	107.48	23033000	0	49924	0	1424400	1581200	2141300	3683400	4600500	9552600	50	257130	0	998.48	0	0	1.26894e-05	0	1	0	0	28488	21904	42827	0.000228763	0.000253263	0.000604168	3	0.000362065	0.000171485
P161_RS0106005	P161_RS0106005	1163	tetratricopeptide repeat protein			23	23	23	3	2	2	14	12	14	5	12	9	27.2	115.39	84730000	0	324820	487310	12239000	6110600	12872000	11918000	17222000	23556000	53	1345200	0	6128.7	9194.5	0	7.78881e-05	0.000129161	2	0.000103524	5.31015e-05	230920	106750	182010	0.00185432	0.00123429	0.00256765	3	0.00188542	0.000544786
P161_RS0106010	P161_RS0106010	1164	hypothetical protein			16	16	16	3	5	2	7	6	6	6	9	8	32.2	65.126	81442000	2896700	2244000	1128500	6396900	7228800	5003100	22425000	19532000	14588000	29	2616100	99886	58738	38912	0.000846543	0.000746486	0.000546621	3	0.000713217	0.000124682	177980	217640	172520	0.00142921	0.00251644	0.00243377	3	0.00212647	0.000494194
P161_RS0106020	P161_RS0106020	1166	hypothetical protein			15	15	15	1	3	0	2	2	1	7	4	3	11.4	174.87	84664000	257360	5896800	0	8336400	7280000	4231900	5406900	22420000	30835000	81	109990	3177.3	45174	0	2.69279e-05	0.000574105	0	2	0.000300516	0.000264517	27913	4997.5	52245	0.000224146	5.7783e-05	0.000737029	3	0.000339653	0.000289079
P161_RS0106025	P161_RS0106025	1167	hypothetical protein			56	56	56	7	18	11	36	29	25	28	32	38	41.7	156.5	253620000	895460	7505700	1579700	40904000	22715000	22796000	39664000	67403000	50160000	84	2158100	10660	85997	18806	9.03445e-05	0.00109291	0.000264179	3	0.000482479	0.000437438	395500	235340	228740	0.00317593	0.00272109	0.00322687	3	0.0030413	0.000227373
P161_RS0106030	P161_RS0106030	1168	hypothetical protein			26	26	26	20	19	18	20	20	22	22	24	19	68.8	34.823	1108800000	54283000	58586000	63077000	150580000	53357000	67253000	293250000	197060000	171320000	18	36911000	1989300	2193600	2142700	0.0168595	0.0278779	0.0300998	3	0.0249457	0.00578934	5351000	2024000	2392700	0.0429694	0.0234023	0.0337542	3	0.0333753	0.00799273
P161_RS0106035	P161_RS0106035	1169	hypothetical protein			27	27	27	0	0	1	7	6	0	19	12	8	21.6	169.29	24177000	0	0	0	1252000	253270	0	13329000	3482400	5860100	77	170500	0	0	0	0	0	0	0	0	0	16260	3289.3	0	0.00013057	3.80322e-05	0	2	8.43013e-05	5.48314e-05
P161_RS0106040	P161_RS0106040	1170	hypothetical protein			31	31	31	5	7	3	17	25	17	20	20	18	46.6	72.903	533390000	3258900	8470400	1536200	58133000	54093000	46115000	159000000	105000000	97785000	30	12828000	80925	254340	51208	0.000685847	0.00323234	0.00071935	3	0.00154585	0.00119261	1496600	1339600	1242600	0.0120179	0.015489	0.0175296	3	0.0150122	0.00227524
P161_RS0106045	P161_RS0106045	1171	hypothetical protein			17	17	17	9	8	9	13	13	10	12	13	11	37.5	52.1	581190000	20728000	10017000	23236000	61766000	40797000	19705000	94753000	154490000	155700000	20	21983000	992340	479890	927680	0.00841017	0.0060988	0.0130317	3	0.00918022	0.00288224	2145600	1864900	830920	0.0172295	0.0215627	0.0117219	3	0.016838	0.004027
P161_RS0106055	P161_RS0106055	1173	serine--tRNA ligase			32	32	32	19	14	22	19	17	19	21	22	23	67.2	47.348	2504200000	152930000	91550000	196920000	158790000	66280000	133450000	552500000	317630000	834110000	21	52270000	3974000	2988000	4296200	0.03368	0.0379737	0.0603513	3	0.0440017	0.0116931	3239200	1557200	3852400	0.0260113	0.018005	0.0543465	3	0.0327876	0.0155909
P161_RS0106065	P161_RS0106065	1174	tetratricopeptide repeat protein			12	12	12	2	3	5	5	4	2	4	7	6	22.4	71.241	23892000	343920	1529500	2016800	2081500	2414000	609990	5434100	5719500	3742600	29	501910	11859	52741	69543	0.000100506	0.000670272	0.000976913	3	0.000582564	0.000363127	43893	36561	21034	0.000352468	0.000422733	0.00029673	3	0.00035731	5.15541e-05
P161_RS0106070	P161_RS0106070	1175	DUF4286 family protein			2	2	2	1	1	0	0	1	1	1	0	0	21.1	12.769	2365100	295450	279700	0	0	0	0	1789900	0	0	5	473010	59090	55941	0	0.000500793	0.00071094	0	2	0.000605866	0.000298215	0	0	0	0	0	0	0	0	0
P161_RS0106080	P161_RS0106080	1177	hypothetical protein			17	17	17	10	8	7	10	5	9	11	13	6	78.4	17.84	240620000	25486000	10262000	5100800	22832000	20023000	9797800	70527000	53149000	23442000	10	20033000	2000200	1018800	475300	0.0169519	0.0129477	0.00667683	3	0.0121921	0.00422866	2115600	1610900	908760	0.0169886	0.0186259	0.01282	3	0.0161448	0.00244416
P161_RS0106085	P161_RS0106085	1178	16S rRNA (adenine(1518)-N(6)/adenine(1519)-N(6))-dimethyltransferase RsmA			23	23	23	12	11	12	17	16	9	15	17	17	64	30.623	519080000	28397000	31831000	23788000	88752000	17143000	12739000	126750000	74323000	115360000	14	11913000	876230	747680	841960	0.00742613	0.00950207	0.0118275	3	0.00958524	0.00179782	2083100	631620	546540	0.0167276	0.00730304	0.00771013	3	0.0105803	0.00435001
P161_RS0106090	P161_RS0106090	1179	magnesium transporter			14	14	14	7	1	8	8	7	7	10	5	6	32	49.34	320590000	20691000	2604000	38169000	37041000	10686000	7006400	63751000	31108000	109540000	13	6660300	492700	200310	571840	0.00417568	0.00254569	0.00803299	3	0.00491812	0.00230087	503890	441600	238040	0.00404632	0.00510595	0.00335807	3	0.00417011	0.000718919
P161_RS0106105	P161_RS0106105	1182	RNA methyltransferase			9	9	9	5	4	6	8	5	8	8	7	7	54	19.642	131470000	10791000	2850500	1976200	12465000	6900700	5570400	25589000	40493000	24830000	11	11327000	981040	259130	179660	0.0083144	0.00329322	0.00252379	3	0.00471047	0.00256765	1020000	627330	491530	0.00819076	0.00725343	0.0069341	3	0.00745943	0.000533308
P161_RS0106110	P161_RS0106110	1183	DNA mismatch repair protein MutS			41	41	41	21	18	18	20	27	25	17	21	20	45.2	98.478	608080000	46318000	22023000	18445000	47433000	47956000	162000000	72231000	72799000	118880000	52	6589800	758090	350260	267190	0.00642488	0.00445136	0.00375338	3	0.00487654	0.00113132	634400	386500	481070	0.00509433	0.00446886	0.00678654	3	0.00544991	0.000979023
P161_RS0106115	P161_RS0106115	1184	hypothetical protein			13	13	13	11	8	7	8	9	7	7	8	6	48.5	27.706	183830000	15553000	15723000	7631600	14640000	16506000	7595800	39709000	41888000	24589000	12	13398000	1240900	1223000	635970	0.0105167	0.0155428	0.00893386	3	0.0116645	0.0028175	1115200	1147400	602710	0.00895523	0.0132667	0.00850253	3	0.0102415	0.00214711
P161_RS0106120	P161_RS0106120	1185	hypothetical protein			7	7	7	4	2	3	0	2	1	3	6	5	45.9	21.106	43938000	4483200	1657800	1384200	0	1388000	410540	6894000	16962000	10758000	13	3058200	344860	127520	106470	0.00292272	0.00162062	0.00149565	3	0.002013	0.000645292	0	106770	31580	0	0.00123452	0.000445504	2	0.00084001	0.000510451
P161_RS0106125	P161_RS0106125	1186	hypothetical protein			4	4	4	0	1	0	0	2	1	0	2	1	34.5	18.214	6323400	0	0	0	0	2157500	1096600	0	1645300	1424000	9	531270	0	0	0	0	0	0	0	0	0	0	239720	121850	0	0.00277174	0.00171896	2	0.00224535	0.0011424
P161_RS0106135	P161_RS0106135	1188	O-methyltransferase			21	21	21	16	14	11	8	13	11	16	14	13	77.1	24.573	266300000	19125000	27794000	19740000	16290000	11469000	17513000	60245000	45518000	48609000	16	9208200	789640	1205600	703590	0.00669227	0.0153217	0.00988376	3	0.0106326	0.0035625	829240	462880	258930	0.00665893	0.005352	0.00365277	3	0.00522123	0.00123074
P161_RS0106140	P161_RS0106140	1189	hypothetical protein			2	2	2	0	0	1	0	0	2	0	0	0	26.4	10.328	513380	0	0	200450	0	0	312930	0	0	0	5	102680	0	0	40090	0	0	0.000563169	1	0	0	0	0	62585	0	0	0.000882897	1	0	0
P161_RS0106145	P161_RS0106145	1190	sigma-70 family RNA polymerase sigma factor	SF|Ecf		4	4	4	2	0	0	2	2	1	2	3	2	19.1	22.39	26333000	443030	0	0	552920	939040	101540	10695000	8879900	4721600	11	692100	40276	0	0	0.000341343	0	0	1	0	0	50266	51884	9230.7	0.000403644	0.000599903	0.000130219	3	0.000377922	0.000192608
P161_RS18150	P161_RS18150	1191	hypothetical protein			5	5	5	2	0	1	1	0	3	0	1	0	31.3	21.153	4427500	887220	0	68638	123800	0	318850	0	3029000	0	10	421540	88722	0	6863.8	0.000751927	0	9.642e-05	2	0.000424174	0.000334063	12380	0	23058	9.94134e-05	0	0.000325283	2	0.000212348	0.0001361
P161_RS0106155	P161_RS0106155	1192	3-methyl-2-oxobutanoate hydroxymethyltransferase			16	16	16	12	9	8	10	10	7	11	12	11	71	29.903	887060000	69474000	65535000	37421000	90366000	26057000	49504000	185320000	199120000	164260000	10	62625000	5275400	5025600	3082700	0.0447095	0.0638691	0.0433046	3	0.0506277	0.0093806	6425500	2234000	3629400	0.0515978	0.0258304	0.0512006	3	0.0428762	0.0120543
P161_RS0106165	P161_RS0106165	1194	VOC family protein			3	3	3	2	1	0	0	1	0	1	0	0	21.9	17.583	3770900	1755700	315260	0	0	444460	0	1255500	0	0	7	283390	58998	45037	0	0.000500013	0.000572364	0	2	0.000536189	0.000254482	0	63494	0	0	0.000734142	0	1	0	0
P161_RS0106170	P161_RS0106170	1195	2-hydroxyacid dehydrogenase			15	15	15	4	2	0	9	7	8	12	11	11	57.4	34.988	142860000	2520500	4445600	0	22918000	3291200	7874000	41786000	25127000	34900000	19	5646000	132660	233980	0	0.00112431	0.00297359	0	2	0.00204895	0.00122593	1013500	163000	383990	0.00813857	0.00188467	0.00541701	3	0.00514675	0.00256028
P161_RS0106175	P161_RS0106175	1196	DUF1801 domain-containing protein			8	8	8	3	1	1	3	3	2	6	3	4	87.4	17.646	95215000	3299000	919510	726160	6975400	5848600	1237500	25060000	34030000	17120000	6	8192400	411590	153250	121030	0.00348826	0.00194761	0.00170018	3	0.00237869	0.000791065	703840	694610	149980	0.00565195	0.00803135	0.00211579	3	0.00526636	0.00243036
P161_RS0106180	P161_RS0106180	1197	VOC family protein			4	4	4	2	0	1	3	2	2	3	3	3	28.9	15.033	64141000	2650400	0	763750	4070500	4025200	1268700	17680000	20794000	12889000	9	5368400	248430	0	84861	0.00210547	0	0.00119209	2	0.00164878	0.00086206	245140	401970	140960	0.00196851	0.00464773	0.00198855	3	0.00286826	0.0012583
P161_RS0106190	P161_RS0106190	1199	methyltransferase domain-containing protein			13	13	13	9	6	5	6	4	5	10	5	3	60.9	32.319	68829000	5505200	5917700	3687600	8710200	2908600	4761900	16024000	13232000	8082400	14	4539800	355150	422690	263400	0.00300993	0.00537186	0.00370014	3	0.00402731	0.000991617	570770	207760	340130	0.00458337	0.0024022	0.00479827	3	0.00392795	0.00108243
P161_RS0106195	P161_RS0106195	1200	tRNA uridine-5-carboxymethylaminomethyl(34) synthesis enzyme MnmG			32	32	32	21	13	18	23	20	13	18	22	22	48.5	69.828	664270000	52600000	23012000	34865000	45917000	36313000	29200000	195400000	157940000	89017000	29	13808000	1409700	608160	644350	0.0119473	0.00772895	0.00905158	3	0.00957595	0.00176161	886300	857060	668730	0.00711713	0.00990966	0.00943389	3	0.00882023	0.00121984
P161_RS0106200	P161_RS0106200	1201	rRNA maturation RNase YbeY			2	2	2	2	1	2	2	2	1	2	2	2	8	16.124	32682000	2351500	1168200	762870	2711900	1175700	627590	6710200	10383000	6790500	4	5962600	358400	292050	155630	0.00303747	0.00371159	0.00218623	3	0.00297843	0.000624123	516190	293940	156900	0.00414509	0.00339865	0.00221342	3	0.00325238	0.000795355
P161_RS0106205	P161_RS0106205	1202	DUF4175 family protein			32	32	32	5	11	7	9	8	9	7	19	11	32.2	130.1	65122000	2587700	6633900	1144900	5909100	4862100	4919100	13062000	12401000	13603000	58	840200	39515	82118	19739	0.000334893	0.00104362	0.000277286	3	0.000551932	0.000348468	68544	67147	48500	0.000550419	0.00077638	0.000684198	3	0.000670332	9.27676e-05
P161_RS0106210	P161_RS0106210	1203	hypothetical protein			8	8	8	5	5	4	4	6	4	4	7	5	35.9	31.493	81655000	6695600	5438800	3294200	8789500	4497500	9240100	13024000	15568000	15106000	13	5208800	447680	394310	221160	0.00379413	0.00501118	0.00310677	3	0.00397069	0.000787435	560880	290370	695240	0.00450396	0.00335737	0.00980787	3	0.00588973	0.00280981
P161_RS0106215	P161_RS0106215	1204	glutamate--tRNA ligase			39	39	39	34	26	32	25	23	19	28	30	28	63.6	58.855	4394100000	420030000	114740000	480490000	214950000	200350000	93007000	952980000	646350000	1271200000	22	85099000	8307800	2832400	8375400	0.0704094	0.0359962	0.117654	3	0.0746867	0.0334737	3532500	3841000	2490400	0.0283665	0.0444111	0.0351325	3	0.0359701	0.0065769
P161_RS0106220	P161_RS0106220	1205	hypothetical protein			15	15	15	13	9	9	9	10	7	11	10	14	57	21.945	764900000	88750000	35266000	16346000	42274000	31536000	12779000	142240000	212680000	183030000	11	21571000	2913600	1449000	475930	0.024693	0.018415	0.00668568	3	0.0165979	0.00746291	1577600	1613100	633100	0.0126684	0.0186513	0.00893125	3	0.013417	0.00400334
P161_RS0106225	P161_RS0106225	1206	SPFH domain-containing protein			26	26	26	14	17	16	19	17	17	21	21	15	52.9	34.433	1.56e+09	68431000	105810000	39307000	214090000	101420000	123350000	326550000	351850000	229170000	14	77405000	4262800	4711800	2592100	0.0361276	0.0598811	0.0364128	3	0.0441405	0.0111309	11374000	5453900	8355300	0.091335	0.0630601	0.11787	3	0.0907549	0.0223797
P161_RS0106235	P161_RS0106235	1208	DUF2807 domain-containing protein			17	17	17	10	10	9	11	12	11	12	13	11	70.7	25.073	502860000	39519000	40319000	26914000	37920000	38352000	23196000	104680000	98308000	93652000	15	20648000	1834900	1940300	1245700	0.0155509	0.0246588	0.0174991	3	0.0192363	0.0039159	1872400	1966100	766930	0.0150357	0.0227328	0.0108192	3	0.0161959	0.00493242
P161_RS0106240	P161_RS0106240	1209	YbjQ family protein			4	4	4	2	1	1	1	1	1	2	2	1	29	11.843	72708000	3804100	2944100	4855000	8428500	3743300	2286700	20897000	17906000	7843500	2	6548700	445400	285370	434700	0.00377481	0.00362669	0.0061065	3	0.00450267	0.00113569	985910	348400	195530	0.00791701	0.00402834	0.00275838	3	0.00490124	0.00219459
P161_RS0106245	P161_RS0106245	1210	ribonuclease R			40	40	40	29	27	27	27	24	26	23	29	22	41.9	84.72	1149400000	106520000	65651000	52042000	124210000	65200000	81804000	245530000	207670000	200760000	39	16316000	1666400	1148800	966520	0.0141229	0.0145998	0.0135773	3	0.0141	0.000417751	2131100	1206000	1008100	0.0171131	0.0139442	0.0142214	3	0.0150929	0.00143294
P161_RS0106250	P161_RS0106250	1211	diacylglycerol kinase family lipid kinase			9	9	9	3	3	2	4	2	4	4	5	2	30.1	35.581	25516000	887370	950380	789350	2419900	703200	1202200	10441000	6724500	1398700	21	980390	42256	45256	37588	0.000358123	0.000575147	0.000528022	3	0.000487097	9.32055e-05	103680	33486	57247	0.000832567	0.000387178	0.000807593	3	0.000675779	0.000204326
P161_RS0106260	P161_RS0106260	1212	ribose 5-phosphate isomerase B			7	7	7	2	3	3	5	4	3	6	3	3	74.3	15.588	164020000	8383900	7759800	4957400	13825000	4025800	1481200	47893000	54825000	20872000	6	10325000	588720	116380	123700	0.00498946	0.00147904	0.00173769	3	0.0027354	0.00159735	1341900	503570	175210	0.0107757	0.00582247	0.00247172	3	0.00635662	0.00341105
P161_RS0106265	P161_RS0106265	1213	GNAT family N-acetyltransferase			9	9	9	4	3	3	2	3	5	6	3	5	61.6	17.143	90460000	11105000	3154400	2409200	5294400	4732200	2750500	29406000	20742000	10866000	9	532630	141900	224300	218490	0.00120262	0.00285057	0.00306926	3	0.00237415	0.000833197	588270	525800	305620	0.0047239	0.00607951	0.00431143	3	0.00503828	0.000755268
P161_RS0106280	P161_RS0106280	1215	TonB-dependent receptor plug domain-containing protein	putative SusC-like		23	23	23	8	3	5	13	11	8	13	15	16	26.1	95.987	154450000	5807400	2077600	1916800	13318000	11265000	6467000	45853000	27434000	40314000	49	2766800	118520	42401	39119	0.00100447	0.000538863	0.000549528	3	0.00069762	0.000217018	268590	214410	117960	0.00215682	0.00247909	0.00166408	3	0.0021	0.000335144
P161_RS0106285	P161_RS0106285	1216	FecR family protein			3	3	3	1	0	0	1	2	1	1	1	1	11.8	35.206	8238000	2036500	0	0	577980	1443500	162980	914250	1897200	1205500	14	118230	145460	0	0	0.00123279	0	0	1	0	0	41284	103110	11642	0.000331517	0.0011922	0.000164236	3	0.00056265	0.000450365
P161_RS0106290	P161_RS0106290	1217	sigma-70 family RNA polymerase sigma factor	SF|Ecf		5	5	5	2	1	0	2	2	0	1	1	2	33.7	19.605	8985000	2313700	1366100	0	809360	2247200	0	0	609110	1639600	9	184530	184530	151790	0	0.00156391	0.00192906	0	2	0.00174648	0.000836688	89929	249680	0	0.000722144	0.0028869	0	2	0.00180452	0.00122664
P161_RS0106295	P161_RS0106295	1218	hypothetical protein			14	14	14	10	10	8	8	11	8	10	11	9	48.6	38.064	1178800000	88054000	94804000	73122000	72081000	44202000	29074000	352490000	220400000	204540000	7	92681000	7718300	9826900	8580800	0.0654133	0.124888	0.12054	3	0.103614	0.0270699	7823500	4221600	3607900	0.0628239	0.0488118	0.0508973	3	0.0541777	0.00617284
P161_RS0106300	P161_RS0106300	1219	hypothetical protein			8	8	8	7	7	6	6	6	5	8	8	8	29.1	28.263	1375500000	72021000	73825000	48067000	96368000	30215000	48980000	271740000	283600000	450740000	7	101460000	5741900	6058900	4477100	0.0486631	0.077001	0.0628926	3	0.0628522	0.0115689	7582900	2428800	2468300	0.0608919	0.0280827	0.0348207	3	0.0412651	0.0141482
P161_RS0106305	P161_RS0106305	1220	PorT family protein			11	11	11	9	9	7	6	8	7	10	10	10	69.7	21.833	1.9568e+09	216630000	122130000	52979000	87447000	77012000	32261000	381710000	524390000	462210000	13	99595000	12730000	6688800	2855900	0.107888	0.0850062	0.0401186	3	0.0776709	0.0281487	5731000	4751800	2287900	0.0460208	0.0549422	0.0322758	3	0.0444129	0.00932309
P161_RS0106310	P161_RS0106310	1221	pseudouridine synthase			5	5	5	2	1	2	0	1	2	2	4	1	18.9	21.077	22604000	1876900	1611700	1898100	0	1068800	1213300	4542200	7163700	3229400	10	1758200	127850	161170	189810	0.00108354	0.00204827	0.00266638	3	0.00193273	0.000651334	0	106880	121330	0	0.00123579	0.00171162	2	0.00147371	0.00072136
P161_RS0106315	P161_RS0106315	1222	aldose 1-epimerase			19	19	19	13	13	9	11	12	10	13	13	12	58.7	30.544	372510000	23107000	18094000	10418000	25162000	18304000	17170000	104520000	71250000	84486000	15	6187500	656250	471300	219300	0.00556178	0.00598963	0.00308064	3	0.00487735	0.00128242	916870	223490	567920	0.00736261	0.00258408	0.00801175	3	0.00598615	0.00242018
P161_RS0106320	P161_RS0106320	1223	DNA damage-inducible protein D			22	22	22	13	11	11	14	12	14	18	19	15	74.6	32.532	528250000	22169000	21265000	12509000	46628000	18069000	23007000	163510000	99335000	121760000	15	17099000	871660	921730	446700	0.0073874	0.011714	0.00627507	3	0.00845883	0.00234614	2093200	721330	861330	0.0168087	0.0083403	0.0121509	3	0.0124333	0.00346298
P161_RS0106325	P161_RS0106325	1224	recombinase RecA			39	39	39	27	28	28	34	26	26	31	32	31	80	36.18	8.4164e+09	479220000	421490000	639830000	818630000	360900000	691800000	2.0765e+09	1.958e+09	970120000	17	262190000	15528000	14792000	21364000	0.131601	0.187988	0.300113	3	0.206567	0.0700379	27503000	12059000	17783000	0.220853	0.139431	0.250868	3	0.203717	0.04708
P161_RS0106345	P161_RS0106345	1228	dUTP diphosphatase			13	13	13	7	8	7	7	7	6	7	6	7	75.5	15.373	362070000	31628000	25069000	19085000	30064000	34782000	12620000	63194000	81618000	64013000	8	33052000	3423700	2298500	2111800	0.0290162	0.029211	0.0296657	3	0.0292977	0.000272166	3335200	3396100	1517300	0.0267822	0.039267	0.0214048	3	0.0291513	0.00748218
P161_RS0106350	P161_RS0106350	1229	alpha/beta hydrolase	CAZyme, single-domain, contains CE1 domain		18	18	18	7	8	9	10	9	13	13	11	10	49.1	32.821	509580000	44802000	20642000	19780000	66698000	7504800	51733000	88933000	140020000	69467000	16	12929000	1339600	454070	1060200	0.0113532	0.00577066	0.0148933	3	0.0106724	0.00375528	1882200	170460	1346600	0.0151144	0.00197093	0.0189967	3	0.0120273	0.00728545
P161_RS0106355	P161_RS0106355	1230	NAD(P)H-dependent glycerol-3-phosphate dehydrogenase			17	17	17	11	10	7	9	11	12	13	10	10	63.4	37.231	309950000	29196000	27866000	15377000	54276000	10053000	25753000	71131000	38570000	37726000	16	8874200	750550	741530	703860	0.00636098	0.00942391	0.00988755	3	0.00855748	0.00156465	1677400	399930	617430	0.0134698	0.00462415	0.00871019	3	0.00893471	0.00361471
P161_RS0106360	P161_RS0106360	1231	hypothetical protein			20	20	20	15	14	12	10	12	11	17	16	16	68	24.852	592870000	49241000	51574000	31858000	28711000	25617000	8645500	134880000	111940000	150400000	14	34164000	3133200	3329100	2000000	0.0265542	0.0423087	0.0280952	3	0.0323194	0.00709148	1896900	1561300	582470	0.0152324	0.0180524	0.008217	3	0.0138339	0.00413524
P161_RS0106375	P161_RS0106375	1234	DUF547 domain-containing protein			13	13	13	4	3	2	5	5	4	6	5	4	48.6	29.852	157470000	3787900	4561500	1973000	15094000	6392300	9331300	48475000	12676000	55175000	14	4842800	137810	173910	105810	0.00116795	0.00221018	0.00148638	3	0.0016215	0.000436083	919850	372150	200480	0.00738654	0.00430294	0.00282821	3	0.00483923	0.00189918
P161_RS0106380	P161_RS0106380	1235	glycosyltransferase	CAZyme, single-domain, contains GT2 domain		4	4	4	0	0	0	1	0	0	1	0	4	19.2	26.99	19449000	0	0	0	2296900	0	0	739480	0	16412000	12	161330	0	0	0	0	0	0	0	0	0	191410	0	0	0.00153705	0	0	1	0	0
P161_RS0106390	P161_RS0106390	1237	glycerol-3-phosphate dehydrogenase/oxidase			39	39	39	26	18	22	25	22	26	19	25	26	57.5	62.499	1.4883e+09	109300000	37611000	90559000	125750000	95791000	58891000	260710000	296250000	413460000	30	36672000	3165700	1089200	2385300	0.0268296	0.0138424	0.0335078	3	0.0247266	0.00816493	3214900	2809800	1575000	0.0258162	0.032488	0.0222188	3	0.026841	0.00425456
P161_RS0106395	P161_RS0106395	1238	hypothetical protein			17	17	17	12	9	10	9	9	8	11	11	7	75.7	16.259	547220000	110330000	40890000	27718000	35305000	24967000	22525000	121390000	93915000	70182000	8	25183000	5773400	2700800	1817100	0.0489301	0.0343238	0.0255259	3	0.0362599	0.0096523	1540800	2089100	1614600	0.0123729	0.024155	0.0227774	3	0.0197684	0.00525961
P161_RS0106400	P161_RS0106400	1239	2OG-Fe(II) oxygenase			3	3	3	2	2	1	1	1	0	1	1	0	18.9	22.759	3696900	1042600	675710	172960	415700	296610	0	924440	168930	0	9	166110	20091	75079	19218	0.000170273	0.00095416	0.000269967	3	0.0004648	0.000348415	46189	32956	0	0.000370905	0.00038105	0	2	0.000375978	0.000177286
P161_RS0106405	P161_RS0106405	1240	pyridoxamine 5'-phosphate oxidase family protein			9	9	9	4	2	1	6	2	3	7	6	5	60.6	20.456	180710000	9689000	3112700	1502200	12057000	4957800	3276200	50739000	65291000	30089000	7	9999700	864960	444670	214600	0.00733062	0.0056512	0.00301462	3	0.00533214	0.00177638	776300	708260	468020	0.00623381	0.00818918	0.00660244	3	0.00700848	0.000848338
P161_RS0106410	P161_RS0106410	1241	nucleotidyltransferase			5	5	5	3	3	2	3	4	3	4	3	4	49.5	11.56	63230000	2908300	2086400	891990	4278100	6337500	2427600	15023000	15310000	13967000	6	6110200	102070	278240	108940	0.000865053	0.00353608	0.00153035	3	0.00197716	0.00113529	359640	574020	404610	0.00288797	0.00663704	0.0057079	3	0.00507764	0.00159412
P161_RS0106415	P161_RS0106415	1242	DUF86 domain-containing protein			10	10	10	6	5	3	5	7	5	5	9	4	49.2	14.139	87392000	6403000	3970300	1911000	6589800	5241900	1287200	19586000	28014000	14389000	6	2670600	263320	249380	118190	0.00223166	0.00316931	0.00166029	3	0.00235375	0.000622074	207380	221790	41652	0.00166529	0.00256442	0.000587592	3	0.00160577	0.000808135
P161_RS0106420	P161_RS0106420	1243	sodium:solute symporter			4	4	4	3	4	3	2	2	2	2	1	1	7.9	53.39	13715000	380900	1947300	2558400	190840	561860	421550	2331900	3868200	1453700	14	979620	27207	139100	182740	0.000230582	0.00176779	0.00256706	3	0.00152181	0.000969591	13631	40133	30111	0.000109459	0.000464033	0.000424781	3	0.000332758	0.000158707
P161_RS0106425	P161_RS0106425	1244	hypothetical protein			7	7	7	3	4	4	4	5	3	4	2	3	37.9	15.394	85494000	7153000	5721600	7352200	4780800	6880600	2642200	20345000	15966000	14651000	6	13035000	1192200	722840	1115600	0.010104	0.00918639	0.0156715	3	0.011654	0.00286543	464300	1081100	440370	0.0037284	0.0125001	0.00621238	3	0.00748029	0.00369156
P161_RS0106435	P161_RS0106435	1246	phenylalanine--tRNA ligase subunit alpha			27	27	27	21	20	19	21	20	19	18	20	19	67	39.053	1.8573e+09	183960000	111030000	93788000	275090000	99660000	164330000	355850000	310520000	263050000	22	48910000	4886500	3129300	2896900	0.0414135	0.0397695	0.0406945	3	0.0406258	0.000672942	9068600	2669000	4231400	0.0728223	0.03086	0.0596931	3	0.0544585	0.0175263
P161_RS0106440	P161_RS0106440	1247	hypothetical protein			41	41	41	25	25	26	25	24	29	22	26	28	43	115.66	670850000	43709000	19963000	27783000	68924000	33057000	58301000	119260000	103670000	196180000	61	7864500	483180	275290	291360	0.00409499	0.00349859	0.00409291	3	0.0038955	0.000280658	762600	448050	708390	0.0061238	0.00518053	0.00999338	3	0.00709924	0.00208238
P161_RS0106445	P161_RS0106445	1248	NADP-specific glutamate dehydrogenase			37	37	37	30	32	28	31	31	28	29	32	29	82.2	48.778	8.2783e+09	809050000	449910000	319470000	1.8478e+09	355720000	845130000	1298800000	1086200000	1266200000	30	168060000	16365000	10734000	7846800	0.138695	0.136416	0.110229	3	0.128446	0.0129154	39337000	7525800	16158000	0.315882	0.0870162	0.227944	3	0.210281	0.0942653
P161_RS0106450	P161_RS0106450	1249	NADP-specific glutamate dehydrogenase			26	26	26	15	19	14	19	17	21	20	21	19	69.4	49.185	1.6272e+09	102870000	60519000	37931000	304510000	134140000	215790000	286080000	241510000	243880000	23	41532000	2710300	1716200	1197800	0.02297	0.0218107	0.0168262	3	0.0205357	0.00266533	6875100	2424000	5442300	0.0552081	0.0280272	0.0767755	3	0.0533369	0.0199453
P161_RS0106465	P161_RS0106465	1252	SulP family inorganic anion transporter			10	10	10	5	5	5	6	6	6	7	9	7	22.5	58.849	326130000	12291000	6859000	5699500	57398000	13844000	21584000	80990000	77063000	50404000	12	15327000	757070	508610	410990	0.00641624	0.00646379	0.00577343	3	0.00621782	0.000314832	2599900	894590	660260	0.0208776	0.0103436	0.0093144	3	0.0135119	0.00522528
P161_RS0106470	P161_RS0106470	1253	alpha/beta fold hydrolase	*		13	13	13	5	4	3	6	8	5	5	9	6	49.3	31.987	120350000	9337700	7521700	4911500	25443000	5098600	6585600	16879000	29399000	15169000	16	5237900	408470	449170	289420	0.00346182	0.00570839	0.00406566	3	0.00441196	0.000949282	1048400	201020	371990	0.00841882	0.00232427	0.00524773	3	0.00533027	0.00248877
P161_RS0106480	P161_RS0106480	1255	DNA polymerase IV			4	4	4	0	0	0	3	0	1	3	1	0	11.4	41.008	13097000	0	0	0	3279300	0	250050	9398600	169600	0	24	67933	0	0	0	0	0	0	0	0	0	37858	0	10419	0.000304006	0	0.000146983	2	0.000225494	0.000124132
P161_RS0106490	P161_RS0106490	1257	FAD-binding oxidoreductase			8	8	8	0	3	0	2	5	3	5	3	3	26.6	41.63	22347000	0	811420	0	1112000	1157600	629040	10955000	5246100	2435700	22	706680	0	36883	0	0	0.000468737	0	1	0	0	50546	27940	28593	0.000405892	0.000323053	0.000403366	3	0.000377437	3.84692e-05
P161_RS0106495	P161_RS0106495	1258	NAD(P)/FAD-dependent oxidoreductase			9	9	9	2	2	2	4	3	2	6	5	1	27.5	42.693	28997000	845140	777680	917390	3924000	1297000	347760	13349000	6760600	778120	21	1225800	40245	37032	43685	0.00034108	0.00047063	0.00061367	3	0.000475127	0.00011133	186860	61762	16560	0.00150052	0.000714116	0.000233615	3	0.000816082	0.000522211
P161_RS0106500	P161_RS0106500	1259	methyltransferase domain-containing protein			8	8	8	1	4	5	5	3	5	5	3	2	30.9	27.516	49703000	1913100	2490200	2682100	7156900	1460800	5231600	14241000	8080100	6447000	11	3814000	173920	179060	160760	0.00147399	0.00227563	0.00225829	3	0.00200264	0.000373878	590410	132800	420370	0.00474109	0.00153549	0.00593023	3	0.00406893	0.00185603
P161_RS0106505	P161_RS0106505	1260	type III polyketide synthase			10	10	10	1	1	0	6	2	2	9	6	4	29.7	39.315	75471000	173580	178530	0	8228900	2907500	2688100	28483000	29199000	3611300	11	2231600	15780	16230	0	0.000133737	0.000206263	0	2	0.00017	8.54335e-05	246180	89942	27968	0.00197686	0.00103994	0.000394549	3	0.00113712	0.000649622
P161_RS0106515	P161_RS0106515	1262	hydroxymyristoyl-ACP dehydratase			3	3	3	1	0	0	0	2	2	0	0	1	18.5	16.662	2771500	0	0	0	0	624850	1146100	0	0	1000500	8	188060	0	0	0	0	0	0	0	0	0	0	44790	143270	0	0.000517879	0.00202113	2	0.00126951	0.000857189
P161_RS0106520	P161_RS0106520	1263	beta-ketoacyl-[acyl-carrier-protein] synthase family protein			4	4	4	1	0	0	1	1	2	0	1	2	17.7	44.943	4842900	338920	0	0	777780	603180	1164200	0	0	1958800	18	112490	18829	0	0	0.000159578	0	0	1	0	0	43210	33510	48711	0.000346983	0.000387456	0.000687174	3	0.000473871	0.000151731
P161_RS0106525	P161_RS0106525	1264	hypothetical protein			2	2	2	1	1	1	0	1	1	2	1	0	20.5	9.6429	12630000	1380100	1011900	893460	0	1480500	962370	4757700	2143800	0	3	4209900	460050	337280	297820	0.00389897	0.0042864	0.00418366	3	0.00412301	0.000163882	0	493490	320790	0	0.00570592	0.00452544	2	0.00511568	0.00245924
P161_RS0106535	P161_RS0106535	1266	YceI family protein			2	2	2	1	0	1	1	2	1	0	0	1	12.4	20.26	9978500	2140200	0	972350	1438300	1707500	608910	0	0	3111400	9	1052300	237800	0	108040	0.00201538	0	0.0015177	2	0.00176654	0.000857182	159810	133300	67656	0.0012833	0.00154127	0.000954435	3	0.00125967	0.000240155
P161_RS0106545	P161_RS0106545	1268	ABC transporter ATP-binding protein			11	11	11	7	6	5	5	5	6	5	5	5	38.8	35.949	101090000	8513600	5450100	5017900	11484000	3781200	4522600	25374000	18608000	18334000	18	3403300	270930	302790	278770	0.00229616	0.00384808	0.00391605	3	0.00335343	0.00074812	505160	158880	221280	0.00405651	0.00183703	0.00312164	3	0.00300506	0.000909842
P161_RS0106550	P161_RS0106550	1269	hypothetical protein			6	6	6	3	4	2	2	0	1	1	1	2	35.6	19.314	22268000	4596200	3058900	1505700	1193000	0	1083700	1008700	3700100	6121800	8	2627400	574530	352310	188220	0.00486919	0.00447742	0.00264404	3	0.00399688	0.000969883	149120	0	135460	0.00119746	0	0.00191096	2	0.00155421	0.00078844
P161_RS0106555	P161_RS0106555	1270	thioredoxin family protein			14	14	14	11	8	7	6	4	4	7	6	5	64.3	22.673	277250000	47701000	21878000	11118000	24719000	19608000	4843400	39089000	67549000	40742000	11	17960000	2901900	1684500	932090	0.0245939	0.0214079	0.0130936	3	0.0196985	0.00484805	1141000	1705700	383660	0.00916241	0.019722	0.00541236	3	0.0114322	0.00605835
P161_RS0106560	P161_RS0106560	1271	NAD-dependent epimerase/dehydratase family protein			15	15	15	13	11	13	12	12	12	12	14	13	55.4	35.583	624530000	57858000	54423000	47840000	51881000	21853000	38704000	126020000	125470000	100480000	17	21207000	1758500	1734100	2058700	0.0149034	0.0220382	0.0289198	3	0.0219538	0.00572247	2279800	810990	1360400	0.0183072	0.00937698	0.0191914	3	0.0156252	0.00443286
P161_RS0106565	P161_RS0106565	1272	hypothetical protein			10	10	10	9	10	6	6	8	6	8	9	8	53.6	23.716	191240000	17101000	21547000	5658000	14712000	11240000	4416600	39720000	45480000	31362000	15	11179000	1010800	1289300	331750	0.00856662	0.0163854	0.00466029	3	0.00987077	0.00487477	666670	727740	281960	0.00535347	0.00841441	0.00397766	3	0.00591518	0.00185434
P161_RS0106570	P161_RS0106570	1273	nuclear transport factor 2 family protein			5	5	5	4	1	2	0	4	2	1	1	1	23.8	18.284	23587000	5312600	523890	649310	0	3258300	558040	6032700	7252600	0	10	2358700	531260	52389	64931	0.00450248	0.000665798	0.000912125	3	0.0020268	0.00175345	0	325830	55804	0	0.00376737	0.000787237	2	0.00227731	0.00162255
P161_RS0106575	P161_RS0106575	1274	bifunctional riboflavin kinase/FAD synthetase			11	11	11	6	7	6	7	5	2	6	4	7	28.7	35.297	87035000	5901600	6465700	9956800	5869100	2910000	1216100	26676000	13919000	14120000	16	3549900	336300	348070	511980	0.00285017	0.00442353	0.0071921	3	0.00482193	0.00179483	260830	167690	76005	0.00209451	0.0019389	0.00107222	3	0.00170187	0.000449744
P161_RS0106580	P161_RS0106580	1275	TonB-dependent receptor	SusC-like		72	72	72	48	55	55	63	55	55	46	64	55	82.1	99.567	36689000000	2205100000	1.4667e+09	1414000000	4812300000	3.5632e+09	3.2441e+09	6.2643e+09	6.8313e+09	6.8875e+09	43	485350000	33810000	19901000	19035000	0.286543	0.252917	0.267396	3	0.268952	0.0137718	68471000	48880000	48854000	0.549833	0.56517	0.689192	3	0.601398	0.0623944
P161_RS0106585	P161_RS0106585	1276	lipase			14	14	14	12	11	11	12	11	12	13	12	13	53.9	53.314	22256000000	1310600000	851600000	1.6153e+09	3.5748e+09	2404700000	1369400000	3.4852e+09	2322600000	5322100000	11	666000000	34389000	17953000	52030000	0.29145	0.22816	0.730897	3	0.416836	0.223573	77236000	51275000	32559000	0.620217	0.592862	0.459315	3	0.557465	0.0702949
P161_RS0106590	P161_RS0106590	1277	cysteine desulfurase			14	14	14	11	11	9	5	7	7	11	8	10	40.6	44.568	564050000	77540000	50453000	20288000	34444000	19212000	37927000	173850000	87858000	62483000	17	12053000	1505300	861100	569620	0.0127576	0.0109435	0.0080018	3	0.0105676	0.00195964	1331900	377940	973450	0.0106954	0.00436989	0.0137326	3	0.00959929	0.00390011
P161_RS0106595	P161_RS0106595	1278	serine hydrolase			17	17	17	10	6	10	9	9	7	4	7	8	38.3	50.297	356630000	19005000	8301600	45664000	20682000	24865000	13639000	16029000	42468000	165980000	24	10701000	652590	241280	629580	0.00553076	0.00306637	0.00884409	3	0.00581374	0.00236722	486690	442620	382860	0.0039082	0.00511775	0.00540107	3	0.00480901	0.000647384
P161_RS0106610	P161_RS0106610	1281	Fe-S cluster assembly protein SufD			30	30	30	26	21	23	16	17	16	16	20	23	66.8	49.195	1.4839e+09	176610000	85127000	345990000	41375000	54218000	26391000	150350000	193520000	410330000	25	24907000	3675300	1898400	4679300	0.0311485	0.0241263	0.065733	3	0.0403359	0.0181858	1123500	838520	682670	0.00902188	0.0096953	0.00963054	3	0.00944924	0.000303342
P161_RS0106615	P161_RS0106615	1282	Fe-S cluster assembly ATPase SufC			28	28	28	24	22	21	21	16	21	18	24	23	83.1	27.539	2380300000	318920000	249290000	262720000	183990000	58203000	163510000	436270000	368360000	339060000	16	78088000	10254000	10068000	8687800	0.0869036	0.127952	0.122043	3	0.112299	0.0181188	6108700	2139000	3392900	0.0490538	0.024732	0.0478642	3	0.04055	0.0111956
P161_RS0106620	P161_RS0106620	1283	N-acyl homoserine lactonase family protein			20	20	20	15	13	14	12	10	10	13	10	8	56.6	31.796	1374000000	190680000	151070000	178360000	99300000	46143000	38533000	308550000	250510000	110870000	11	42342000	3991000	4527400	5869100	0.0338241	0.0575376	0.0824468	3	0.0579362	0.0198522	4029400	2510000	1858600	0.0323567	0.0290216	0.0262196	3	0.0291993	0.00250862
P161_RS0106625	P161_RS0106625	1284	Fe-S cluster assembly protein SufB			30	30	30	22	22	28	20	18	18	20	22	22	66.5	53.841	2191600000	284830000	127850000	247560000	124260000	82581000	67595000	291700000	332540000	632660000	27	51754000	7320900	3922900	6019500	0.0620453	0.0498551	0.0845596	3	0.0654867	0.0143755	3029200	2424300	1605500	0.024325	0.0280307	0.0226491	3	0.0250016	0.00224854
P161_RS0106635	P161_RS0106635	1286	iron-sulfur cluster assembly accessory protein			8	8	8	7	5	5	3	1	1	2	3	3	68.8	11.965	145920000	37936000	17325000	13472000	4916700	3227000	862040	15982000	31094000	21109000	6	12840000	3029600	1617200	1139400	0.0256761	0.0205526	0.0160058	3	0.0207449	0.00395022	337410	537830	143670	0.00270946	0.0062186	0.00202678	3	0.00365161	0.00183641
P161_RS0106645	P161_RS0106645	1288	aminopeptidase P family protein			21	21	21	13	13	16	13	13	17	18	15	15	50.5	49.445	2.0793e+09	145060000	68548000	212830000	158450000	99252000	251540000	341120000	235400000	567090000	18	56459000	5292700	2484200	5782200	0.0448561	0.0315711	0.0812261	3	0.0525511	0.0209891	3440600	2815800	4685700	0.0276286	0.0325574	0.066102	3	0.042096	0.0170937
P161_RS0106650	P161_RS0106650	1289	sugar kinase			23	23	23	19	17	20	7	8	6	6	7	5	66.8	37.475	536910000	157170000	136730000	145480000	14206000	5840000	6657500	30872000	22898000	17065000	18	23222000	5879000	6207500	6111500	0.0498251	0.0788895	0.085852	3	0.0715222	0.0156033	760120	324440	362760	0.00610388	0.0037513	0.00511752	3	0.0049909	0.000964602
P161_RS0106655	P161_RS0106655	1290	alpha/beta hydrolase			2	2	2	1	2	0	0	2	0	1	2	1	6.9	30.008	4730500	280230	425680	0	0	366690	0	884900	1789200	983800	13	363890	21556	32744	0	0.000182689	0.000416135	0	2	0.000299412	0.000170307	0	28207	0	0	0.00032614	0	1	0	0
P161_RS0106660	P161_RS0106660	1291	hypothetical protein			28	28	28	15	16	12	23	22	18	18	19	15	75.9	24.689	1.0461e+09	30340000	35600000	12510000	174750000	154520000	62819000	206950000	253650000	114960000	12	46035000	1545900	1874300	840590	0.0131016	0.02382	0.0118083	3	0.0162433	0.00538348	7724700	7230900	3073000	0.0620306	0.0836065	0.0433513	3	0.0629961	0.0164483
P161_RS0106665	P161_RS0106665	1292	Crp/Fnr family transcriptional regulator			9	9	9	4	3	3	7	6	6	3	4	2	48.5	23.042	76690000	4149800	2041200	988750	16020000	16930000	5808900	13165000	13095000	4491400	11	4617100	275970	185560	89886	0.00233887	0.00235823	0.00126268	3	0.0019866	0.000511945	1051600	1127500	480810	0.00844451	0.0130366	0.00678287	3	0.00942133	0.00264486
P161_RS0106670	P161_RS0106670	1293	branched-chain amino acid transport system II carrier protein			2	2	2	1	1	1	0	1	1	2	1	1	4	46.104	6778000	884860	542030	687460	0	203070	676970	1299700	1618100	865830	9	753110	98317	60226	76384	0.000833246	0.000765397	0.00107301	3	0.000890552	0.000131959	0	22563	75218	0	0.000260882	0.00106111	2	0.000660998	0.000451466
P161_RS0106675	P161_RS0106675	1294	serine hydrolase			23	23	23	13	12	13	13	12	13	13	16	18	46.1	58.585	691800000	46247000	18573000	33558000	73439000	36704000	58201000	136220000	106440000	182420000	25	17997000	1415900	548700	924590	0.0119999	0.00697329	0.0129883	3	0.0106538	0.00263362	2008100	944190	1500500	0.0161254	0.0109171	0.0211678	3	0.0160701	0.00418502
P161_RS0106685	P161_RS0106685	1296	alpha/beta hydrolase	*		12	12	12	5	4	6	3	10	2	11	11	6	52.5	29.203	70472000	6431800	3993400	3961700	4944700	3035200	217900	22660000	15597000	9630600	14	2701400	226700	129940	155550	0.0019213	0.00165137	0.00218511	3	0.00191926	0.0002179	353190	90012	15565	0.00283617	0.00104075	0.000219578	3	0.0013655	0.00109262
P161_RS0106695	P161_RS0106695	1298	thiamine-phosphate kinase			14	14	14	9	10	10	11	9	7	10	9	9	39.3	38.288	685010000	16691000	40482000	80855000	78269000	31663000	39974000	164910000	188330000	43828000	13	38738000	658960	2523900	5856600	0.00558475	0.0320756	0.0822712	3	0.0399772	0.0318018	3828800	2255000	2394200	0.0307459	0.0260732	0.0337754	3	0.0301982	0.00316817
P161_RS0106700	P161_RS0106700	1299	choice-of-anchor B family protein			10	10	10	7	6	9	6	7	7	7	6	7	33.1	46.052	335290000	20113000	3630800	36455000	24392000	21631000	13771000	69665000	36205000	109430000	10	10011000	849510	254590	1202400	0.00719968	0.00323552	0.0168908	3	0.00910868	0.00573586	675870	621950	349930	0.00542734	0.00719123	0.00493652	3	0.0058517	0.000968154
P161_RS0106705	P161_RS0106705	1300	hypothetical protein			23	23	23	15	12	4	11	9	5	13	11	9	53.5	47.727	76772000	8515300	18021000	2164900	5502500	3460100	1171500	15815000	12038000	10083000	24	2032800	346560	261130	90203	0.00293713	0.00331863	0.00126714	3	0.00250763	0.000890883	176510	140110	48812	0.0014174	0.00162001	0.000688599	3	0.001242	0.000399962
P161_RS0106710	P161_RS0106710	1301	hypothetical protein			7	7	7	5	3	2	1	5	2	4	6	4	34.5	28.716	33535000	4564200	1340700	1485300	756190	1837000	656780	9719700	8399100	4776000	11	1946700	245690	121880	135030	0.00208225	0.00154894	0.00189685	3	0.00184268	0.000221064	68744	159030	59707	0.000552025	0.00183877	0.000842297	3	0.0010777	0.000551051
P161_RS0106715	P161_RS0106715	1302	DEAD/DEAH box helicase			16	16	16	7	10	7	10	9	3	9	9	6	37.4	48.101	150320000	7223600	7027800	8726400	27097000	6722700	4365200	24288000	28814000	36053000	23	4596900	238060	228120	266380	0.00201758	0.00289912	0.003742	3	0.00288623	0.000704051	793550	180050	101930	0.00637233	0.00208181	0.00143794	3	0.00329736	0.00219016
P161_RS0106725	P161_RS0106725	1304	glycosyl hydrolase	CAZyme, multi-domain, contains five GH74 domains		50	50	50	32	30	29	40	34	37	33	35	39	58.1	105.51	3.7346e+09	230580000	83123000	103720000	357190000	187890000	270910000	736350000	792510000	972360000	41	39928000	2855900	1254300	1214200	0.024204	0.0159406	0.0170566	3	0.0190671	0.00366083	3410600	2412200	2951900	0.0273877	0.0278908	0.041643	3	0.0323071	0.00660462
P161_RS0106730	P161_RS0106730	1305	hypothetical protein			4	4	4	3	3	2	4	2	3	3	3	3	28.1	23.02	33895000	2101600	1403900	106360	3411700	1275600	996860	9742900	7918200	6937800	12	2610200	175130	116990	8863.3	0.00148424	0.0014868	0.000124508	3	0.00103185	0.000641588	224760	106300	83072	0.00180486	0.00122908	0.00117191	3	0.00140195	0.000285853
P161_RS0106735	P161_RS0106735	1306	succinate dehydrogenase cytochrome b subunit			4	4	4	4	3	4	3	4	4	4	4	4	19.6	25.518	186490000	30376000	11189000	11110000	10309000	10456000	6806000	32688000	51808000	21745000	6	22920000	3682900	1042700	1283600	0.0312129	0.0132514	0.0180315	3	0.0208319	0.00759543	1616200	1742700	950770	0.0129783	0.0201498	0.0134127	3	0.0155136	0.00328307
P161_RS0106740	P161_RS0106740	1307	fumarate reductase/succinate dehydrogenase flavoprotein subunit			55	55	55	38	37	47	43	41	31	43	45	44	67.7	74.123	8655800000	505140000	297390000	590860000	387830000	470070000	304770000	3.3946e+09	1.6685e+09	1.0366e+09	32	141930000	9261800	5881800	9296400	0.0784946	0.0747503	0.130592	3	0.0946124	0.0254875	7303700	8637900	6128100	0.0586499	0.0998748	0.0864502	3	0.0816583	0.0171677
P161_RS0106750	P161_RS0106750	1309	succinate dehydrogenase/fumarate reductase iron-sulfur subunit			15	15	15	13	12	11	11	14	11	12	13	12	76.4	26.846	745150000	50626000	53558000	35492000	89913000	39606000	36587000	184220000	135740000	119400000	12	34841000	2613900	2854600	1937900	0.022153	0.0362784	0.0272229	3	0.0285514	0.00584266	4355000	2043300	1510600	0.0349713	0.0236254	0.0213103	3	0.0266357	0.00596949
P161_RS18170	P161_RS18170	1310	helix-turn-helix transcriptional regulator	TR|Xre		2	2	2	0	0	1	0	1	0	1	0	0	20.6	11.705	0	0	0	0	0	0	0	0	0	0	8	0	0	0	0	0	0	0	0	0	0	0	0	0	0	0	0	0	0	0
P161_RS19040	P161_RS19040	1312	GLPGLI family protein			4	4	4	1	0	1	1	0	0	1	2	1	13.3	26.257	3993000	583860	0	1155600	0	0	0	1937300	316250	0	12	332750	48655	0	96301	0.000412356	0	0.0013528	2	0.000882577	0.000566131	0	0	0	0	0	0	0	0	0
P161_RS19045	P161_RS19045	1314	GLPGLI family protein			6	6	6	0	0	0	0	4	0	1	6	4	24.3	28.069	6944600	0	0	0	0	519470	0	984560	3574100	1866500	14	496050	0	0	0	0	0	0	0	0	0	0	37105	0	0	0.000429023	0	1	0	0
P161_RS0106790	P161_RS0106790	1316	ribonuclease H			7	7	7	3	4	2	2	4	3	4	4	5	36.8	24.197	11081000	509060	527650	65461	529180	931280	486810	1564200	3481100	2986000	13	681630	39158	40589	5035.5	0.000331868	0.000515835	7.07367e-05	3	0.000306147	0.000182619	40707	51298	37447	0.000326884	0.000593128	0.000528271	3	0.000482761	0.000113357
P161_RS0106795	P161_RS0106795	1317	phosphoribosylglycinamide formyltransferase			9	9	9	5	4	4	6	5	6	3	4	3	52.1	21.633	79467000	9182800	4122700	2895400	12632000	8284200	5297700	15166000	14278000	7608100	12	4350100	606970	268110	204780	0.00514413	0.00340734	0.00287667	3	0.00380938	0.000968355	712490	334600	281140	0.00572141	0.00386878	0.00396609	3	0.00451876	0.000851329
P161_RS0106800	P161_RS0106800	1318	acyl carrier protein			2	2	2	0	1	0	0	1	0	1	1	1	46.2	8.5373	20472000	0	342930	0	0	310300	0	2794900	7413500	9610700	2	3477300	0	171460	0	0	0.00217904	0	1	0	0	0	155150	0	0	0.0017939	0	1	0	0
P161_RS0106805	P161_RS0106805	1319	beta-ketoacyl-ACP synthase II			23	23	23	15	14	13	19	14	14	16	20	21	85.6	44.113	5414600000	319050000	131240000	75916000	1097500000	186720000	487200000	1074800000	898070000	1144100000	15	112230000	8374100	4739100	2934300	0.0709713	0.060228	0.0412199	3	0.0574731	0.0123012	20870000	6636700	11098000	0.167589	0.0767361	0.156561	3	0.133629	0.0404805
P161_RS0106810	P161_RS0106810	1320	ribonuclease III			14	14	14	2	3	3	4	6	4	12	6	5	59.6	28.143	73933000	3444600	3514800	2001700	6008700	3860700	2893700	21646000	16152000	14410000	13	3122900	160760	204260	134270	0.00136246	0.00259589	0.00188617	3	0.00194817	0.000505451	422860	193060	156470	0.00339563	0.00223224	0.00220735	3	0.00261174	0.00055439
P161_RS0106815	P161_RS0106815	1321	IPExxxVDY family protein			4	4	4	1	2	1	0	0	1	0	2	1	30.8	18.12	6442800	1163900	570670	452460	0	0	0	0	3260000	995830	9	230030	129320	50436	50274	0.001096	0.000640978	0.00070623	3	0.000814402	0.000200893	0	0	0	0	0	0	0	0	0
P161_RS0106820	P161_RS0106820	1322	pyruvate kinase			46	46	46	34	32	34	36	32	36	38	37	39	73.1	52.86	10890000000	588220000	215280000	666450000	717710000	512980000	386800000	2176800000	2.0164e+09	3.6095e+09	22	220120000	14465000	5692900	15389000	0.122592	0.0723496	0.216179	3	0.13704	0.0596001	16684000	13306000	6647300	0.133975	0.153849	0.0937746	3	0.1272	0.0249889
P161_RS0106830	P161_RS0106830	1323	M28 family peptidase			8	8	8	3	4	1	5	4	3	4	4	2	12.5	86.46	2176200000	23876000	108790000	34352000	330670000	52759000	192020000	535010000	383190000	515500000	31	69793000	755800	3480800	1108100	0.00640547	0.0442366	0.0155662	3	0.0220694	0.0161145	10622000	1675900	6176000	0.0852963	0.0193774	0.0871259	3	0.0639332	0.0315146
P161_RS0106835	P161_RS0106835	1324	CBS domain-containing protein			14	14	14	9	10	10	10	13	13	10	11	12	77.4	17.521	1128200000	109350000	56420000	24778000	58422000	113550000	111740000	210800000	255110000	188060000	9	45036000	1934200	1936900	960370	0.0163925	0.0246156	0.0134909	3	0.0181663	0.00471164	3301400	7146900	3040700	0.0265108	0.0826353	0.0428957	3	0.0506806	0.0235647
P161_RS0106840	P161_RS0106840	1325	hypothetical protein			2	2	2	1	2	2	2	1	1	2	1	0	14.5	14.004	29847000	5429900	5557200	3666000	5248100	1207700	493170	7469000	775500	0	5	5969300	1086000	1111400	733190	0.00920395	0.0141245	0.0102996	3	0.0112093	0.0021093	1049600	241550	98634	0.00842845	0.0027929	0.00139145	3	0.00420427	0.00304125
P161_RS0106845	P161_RS0106845	1326	HNH endonuclease			8	8	8	7	5	5	0	0	0	1	1	0	40.1	23.838	26654000	15696000	4372800	3693200	0	0	0	1200700	1691300	0	10	2159800	1334400	235260	300880	0.0113092	0.00298986	0.00422665	3	0.00617522	0.00366519	0	0	0	0	0	0	0	0	0
P161_RS0106865	P161_RS0106865	1330	DGQHR domain-containing protein			31	31	31	17	17	21	18	18	18	19	20	19	60.9	52.327	866660000	50721000	21094000	45221000	86520000	42083000	66055000	189820000	132900000	232250000	25	20026000	1404300	655720	1188600	0.0119016	0.00833338	0.016697	3	0.0123106	0.00342666	2676400	1215900	1706000	0.0214919	0.0140587	0.0240668	3	0.0198725	0.00424323
P161_RS0106870	P161_RS0106870	1331	hypothetical protein			5	5	5	3	1	0	2	2	2	1	3	1	25.1	21.285	20023000	1162500	0	0	882760	963760	296950	586260	8414000	7717200	7	877970	100140	0	0	0.000848696	0	0	1	0	0	126110	137680	42421	0.00101268	0.00159191	0.00059844	3	0.00106768	0.000407442
P161_RS0106875	P161_RS0106875	1332	hypothetical protein			6	6	6	0	0	0	0	2	2	4	3	3	21.7	37.575	15117000	0	0	0	0	715720	745450	4703600	4299700	4652600	14	745460	0	0	0	0	0	0	0	0	0	0	12491	53246	0	0.000144426	0.00075115	2	0.000447788	0.00032544
P161_RS0106880	P161_RS0106880	1333	hypothetical protein			31	31	31	12	15	17	22	21	24	22	23	20	71.4	50.283	1.7054e+09	64825000	38251000	81938000	193200000	84237000	144320000	388990000	278380000	431260000	28	26152000	1310400	672820	1533000	0.0111058	0.0085507	0.021535	3	0.0137305	0.00561633	3325000	1588300	2392300	0.0267003	0.0183645	0.0337486	3	0.0262711	0.00628784
P161_RS0106885	P161_RS0106885	1334	DndE family protein			4	4	4	3	2	2	1	0	0	1	1	2	28.8	14.963	15490000	4015000	1525200	488650	6414000	0	0	1311800	0	1735700	7	1296600	573580	217890	69807	0.00486114	0.00276911	0.000980622	3	0.00287029	0.00158583	916290	0	0	0.00735795	0	0	1	0	0
P161_RS0106890	P161_RS0106890	1335	DNA sulfur modification protein DndD			28	28	28	6	11	5	4	2	3	13	17	18	38.6	81.162	197530000	3357500	7836400	4412400	4588300	610110	15510000	100980000	35200000	25038000	40	1813500	78865	195910	72563	0.000668388	0.00248977	0.00101934	3	0.0013925	0.000789006	100480	15253	23690	0.00080687	0.000176361	0.000334199	3	0.000439143	0.000267887
P161_RS0106895	P161_RS0106895	1336	DNA phosphorothioation system sulfurtransferase DndC			10	10	10	5	4	3	0	0	0	3	8	6	22.3	52.292	40918000	2023700	978360	684510	0	0	0	3573600	15012000	18646000	25	1016600	60350	31143	21821	0.000511472	0.000395788	0.000306533	3	0.000404598	8.38975e-05	0	0	0	0	0	0	0	0	0
P161_RS0106900	P161_RS0106900	1337	hypothetical protein			9	9	9	4	2	4	6	4	4	5	7	3	25.7	24.461	249810000	10734000	3294400	2337600	21094000	27192000	8636600	81485000	63946000	31089000	11	18004000	834110	299490	175780	0.00706916	0.00380614	0.00246929	3	0.0044482	0.00193199	1487500	2017100	651180	0.0119449	0.0233225	0.00918631	3	0.0148179	0.00611821
P161_RS0106905	P161_RS0106905	1338	NAD(P)/FAD-dependent oxidoreductase			4	4	4	0	0	0	1	1	0	2	1	1	12.2	42.039	3068900	0	0	0	214330	826090	0	0	1698300	330090	18	170490	0	0	0	0	0	0	0	0	0	11907	45894	0	9.56151e-05	0.000530644	0	2	0.00031313	0.000230934
P161_RS0106910	P161_RS0106910	1339	hypothetical protein			51	51	51	29	29	25	42	40	40	44	44	40	61.3	79.566	6.9012e+09	192210000	123990000	113460000	655360000	473890000	546010000	2397100000	1.4856e+09	913560000	27	174910000	5680600	3704900	3635300	0.0481436	0.0470846	0.0510673	3	0.0487652	0.00168427	16777000	13485000	13612000	0.134722	0.155919	0.192027	3	0.160889	0.0236571
P161_RS0106915	P161_RS0106915	1340	hypothetical protein			26	26	26	13	11	10	17	19	23	20	19	18	72.3	44.441	5047600000	54010000	54947000	19461000	707420000	393010000	767140000	1098300000	954630000	998740000	20	105750000	1548100	2084200	603570	0.0131203	0.0264876	0.00847872	3	0.0160289	0.00763433	16394000	7678000	15230000	0.131646	0.088776	0.214852	3	0.145092	0.0523411
P161_RS0106950	P161_RS0106950	1347	ATP-dependent helicase			6	6	6	1	1	1	2	1	3	4	2	2	11.8	66.487	43324000	2707100	2579200	129770	3158900	779340	3631000	17387000	5011000	7940800	29	999260	93348	88939	4475	0.000791133	0.0011303	6.28631e-05	3	0.000661433	0.000445326	17994	26874	109660	0.000144495	0.000310728	0.00154699	3	0.000667405	0.000625654
P161_RS18205	P161_RS18205	1348	AAA family ATPase			18	18	18	5	5	6	11	5	11	10	12	11	30.5	77.372	110380000	3417800	2826700	4184200	11544000	3928600	10026000	42175000	19260000	13015000	32	2348100	100260	83410	114230	0.000849713	0.00106004	0.00160466	3	0.00117147	0.000318118	288360	122770	289710	0.00231558	0.00141951	0.00408699	3	0.00260736	0.00110836
P161_RS0107010	P161_RS0107010	1359	hypothetical protein			13	13	13	0	1	0	3	3	2	3	6	4	24.1	75.045	22382000	0	252610	0	1518100	3319500	0	6830800	6122000	4338600	33	234920	0	7654.9	0	0	9.72842e-05	0	1	0	0	17960	45141	0	0.000144222	0.000521938	0	2	0.00033308	0.000220073
P161_RS18215	P161_RS18215	1360	hypothetical protein			18	18	18	8	2	2	5	6	11	9	12	5	32.8	68.464	120970000	7445300	1187600	1563400	7916600	6346300	5165800	42488000	22995000	25863000	39	2539500	154480	30452	40087	0.00130923	0.000387007	0.000563127	3	0.000753122	0.000399749	183800	133390	106250	0.00147594	0.00154231	0.00149889	3	0.00150571	2.75196e-05
P161_RS0107020	P161_RS0107020	1361	hypothetical protein			17	17	17	10	8	8	11	9	14	13	12	7	49.9	42.415	210940000	8856900	6396100	8439400	31440000	10637000	15813000	76811000	38709000	13837000	21	8024800	347340	304570	362140	0.00294374	0.0038707	0.0050872	3	0.00396721	0.000877722	924950	435020	716760	0.00742749	0.00502987	0.0101115	3	0.00752294	0.00207565
P161_RS0107025	P161_RS0107025	1362	hypothetical protein			11	11	11	2	4	2	5	1	1	7	7	4	26.9	45.722	50347000	772210	1935300	562470	3048800	279920	306090	16445000	16669000	10328000	23	1820200	33574	84142	24455	0.000284543	0.00106934	0.000343534	3	0.000565805	0.000356866	122320	12170	13308	0.000982249	0.000140714	0.000187738	3	0.000436901	0.000386097
P161_RS0107035	P161_RS0107035	1363	tetratricopeptide repeat protein			7	7	7	5	3	2	5	4	3	4	4	5	15.2	65.396	36233000	1691600	1914500	1373100	3693400	1253100	2121100	11885000	9090400	3210400	32	1116900	52861	59827	42911	0.000448002	0.000760326	0.000602797	3	0.000603708	0.000127507	100010	39159	66283	0.000803096	0.000452772	0.000935066	3	0.000730311	0.000203511
P161_RS0107040	P161_RS0107040	1364	RHS repeat protein			60	60	60	3	9	3	40	40	24	51	34	36	43.9	150.34	520360000	1668500	2776300	319840	88173000	38669000	18968000	192230000	59823000	117740000	64	4425000	1408.7	41631	4997.6	1.19389e-05	0.000529078	7.02043e-05	3	0.00020374	0.000231275	728450	343680	168480	0.00584957	0.00397376	0.00237678	3	0.0040667	0.00141928
P161_RS0107050	P161_RS0107050	1366	T9SS type A sorting domain-containing protein			2	2	2	0	0	0	1	1	0	1	0	2	11.2	17.536	2596200	0	0	0	890030	207200	0	1021900	0	477020	7	370880	0	0	0	0	0	0	0	0	0	127150	29600	0	0.00102103	0.000342247	0	2	0.000681641	0.000424316
P161_RS0107055	P161_RS0107055	1367	signal peptidase I			10	10	10	4	5	4	7	5	4	5	5	4	29.1	40.566	91804000	3895800	3455900	3246200	11605000	2779500	2438200	28430000	28400000	7553400	20	3514300	194790	172790	162310	0.00165086	0.00219594	0.00228007	3	0.00204229	0.000278904	507810	117060	121910	0.00407779	0.00135349	0.00171981	3	0.0023837	0.00120721
P161_RS0107060;P161_RS19350	P161_RS0107060	1368	efflux RND transporter permease subunit			20	20	20	5	10	9	10	11	14	17	13	13	19.6	123.02	127340000	3464100	3295000	5865000	7982900	7574100	12220000	36817000	17980000	32142000	51	2400800	67924	59733	115000	0.000575662	0.000759131	0.00161548	3	0.000983423	0.000453161	156530	148510	232900	0.00125696	0.00171713	0.00328556	3	0.00208655	0.000868392
P161_RS0107065	P161_RS0107065	1369	hypothetical protein			2	2	2	0	0	0	0	0	0	1	2	2	41.2	9.8408	17172000	0	0	0	0	0	0	2131500	11352000	3688000	2	2845900	0	0	0	0	0	0	0	0	0	0	0	0	0	0	0	0	0	0
P161_RS0107070	P161_RS0107070	1370	6-bladed beta-propeller			52	52	52	32	38	35	48	43	47	44	44	45	79.3	49.506	21095000000	485890000	467080000	271190000	3.4659e+09	1335000000	2619800000	4629300000	3.6003e+09	4.2208e+09	25	395890000	12268000	11801000	7721800	0.103972	0.149976	0.108473	3	0.120807	0.0207071	63784000	29273000	54300000	0.512196	0.338466	0.766019	3	0.538894	0.175566
P161_RS0107075	P161_RS0107075	1371	hypothetical protein			17	17	17	3	4	4	9	13	8	14	14	9	73.9	22.35	645710000	5857300	2141600	1797800	31058000	34825000	11127000	115060000	339160000	104680000	10	17923000	458830	121780	74806	0.00388863	0.00154767	0.00105085	3	0.00216238	0.00123738	1990900	2434300	885550	0.0159872	0.0281463	0.0124926	3	0.0188754	0.00670899
P161_RS0107100	P161_RS0107100	1375	hypothetical protein			34	34	34	22	21	19	26	27	27	27	27	24	63.7	43.294	6.2627e+09	287870000	144980000	91117000	845420000	371310000	535350000	1.539e+09	1.4805e+09	967140000	23	139790000	6106600	2958200	2482200	0.051754	0.037595	0.034869	3	0.041406	0.00740129	17743000	9879300	11041000	0.142479	0.114228	0.155757	3	0.137488	0.0173175
P161_RS0107110	P161_RS0107110	1376	efflux RND transporter periplasmic adaptor subunit			33	33	33	15	15	13	25	20	19	23	25	18	70.1	40.257	1226300000	40497000	43021000	37317000	159750000	66197000	35134000	400250000	329900000	114240000	17	39984000	1675800	1695400	1505500	0.0142026	0.0215464	0.0211487	3	0.0189659	0.00337209	4290100	2601400	1614900	0.0344502	0.0300784	0.0227817	3	0.0291034	0.00481328
P161_RS0107115	P161_RS0107115	1377	efflux RND transporter permease subunit			38	38	38	17	21	16	20	23	24	23	30	28	38	113.26	716130000	39567000	22471000	15495000	50798000	39709000	55967000	163100000	143810000	185220000	43	12916000	759520	453550	293490	0.006437	0.00576405	0.00412283	3	0.0054413	0.00097193	1020800	767630	1059800	0.00819719	0.00887564	0.0149508	3	0.0106745	0.00303642
P161_RS0107120	P161_RS0107120	1378	TolC family protein			22	22	22	11	9	10	12	14	13	14	11	14	51.5	51.897	664210000	42953000	23081000	13079000	78165000	93541000	87723000	127540000	93560000	104570000	22	21558000	1470500	829230	552290	0.0124626	0.0105385	0.00775835	3	0.0102531	0.00193108	2544400	3811700	2989800	0.0204319	0.0440724	0.0421776	3	0.0355606	0.0107255
P161_RS0107125	P161_RS0107125	1379	response regulator transcription factor	RR|CheY		24	24	24	6	4	5	9	16	13	19	18	19	86.3	25.647	427570000	2457900	2112000	3413400	56746000	26861000	61670000	113090000	70789000	90429000	14	12565000	160070	150860	243820	0.00135661	0.00191724	0.00342509	3	0.00223298	0.000873468	1016900	1018800	481760	0.00816587	0.0117798	0.00679627	3	0.00891397	0.00210215
P161_RS0107130	P161_RS0107130	1380	tetratricopeptide repeat-containing sensor histidine kinase	HK|Classic		19	19	19	4	4	2	10	10	6	10	12	5	31.6	80.499	100230000	3016600	2480000	4749000	8023700	15524000	4038400	36437000	20550000	5413800	36	1878300	83794	41014	131920	0.000710162	0.000521236	0.00185316	3	0.00102819	0.000588422	174170	224500	82681	0.00139861	0.00259576	0.0011664	3	0.00172025	0.00062629
P161_RS0107145	P161_RS0107145	1383	hypothetical protein			9	9	9	3	1	1	4	6	5	6	4	5	52.2	21.1	138080000	3490100	1270200	192180	16009000	23378000	9001400	21159000	38784000	24798000	12	9823300	70732	13870	16015	0.00059946	0.00017627	0.000224972	3	0.000333568	0.000189063	890240	1893600	686240	0.00714877	0.0218945	0.00968091	3	0.0129081	0.00643793
P161_RS0107150	P161_RS0107150	1384	ATP-binding protein			9	9	9	3	2	2	3	5	1	3	6	3	11	113.69	120640000	13289000	15887000	10391000	7820000	5171200	1811700	13340000	12630000	40306000	55	1298300	169380	288850	188920	0.00143551	0.00367092	0.00265387	3	0.00258677	0.000913835	142180	92274	32940	0.00114173	0.00106691	0.00046469	3	0.000891109	0.000303067
P161_RS0107165	P161_RS0107165	1387	hypothetical protein			11	11	11	1	2	1	5	7	7	6	4	6	31.3	42.061	157760000	341950	0	846560	24331000	12401000	27572000	40393000	31820000	20055000	24	5535200	14248	0	35273	0.000120753	0	0.000495501	2	0.000308127	0.000210961	730600	452970	874400	0.00586683	0.00523742	0.0123353	3	0.00781319	0.00320793
P161_RS0107170	P161_RS0107170	1388	(2Fe-2S)-binding protein			3	3	3	1	1	1	2	1	1	1	3	1	28.8	16.781	31317000	427730	332340	0	2674900	1467100	0	1247400	14658000	10510000	10	1118700	42773	33234	0	0.000362505	0.000422362	0	2	0.000392434	0.000186602	267490	146710	0	0.00214799	0.00169632	0	2	0.00192215	0.000924683
P161_RS0107175	P161_RS0107175	1389	xanthine dehydrogenase family protein molybdopterin-binding subunit			46	46	46	14	10	12	31	25	27	25	35	31	71.2	78.404	965680000	16846000	8868200	13864000	99719000	60905000	86540000	317970000	221680000	139290000	43	15819000	362540	175010	264880	0.00307256	0.00222416	0.00372093	3	0.00300588	0.000612872	1815100	1193200	1421100	0.0145755	0.0137962	0.0200477	3	0.0161398	0.00278154
P161_RS0107200	P161_RS0107200	1394	histone deacetylase			2	2	2	0	0	0	0	1	0	2	0	0	8	34.019	2024700	0	0	0	0	200410	0	1824300	0	0	19	106560	0	0	0	0	0	0	0	0	0	0	10548	0	0	0.00012196	0	1	0	0
P161_RS0107205	P161_RS0107205	1395	hypothetical protein			89	89	89	65	62	49	75	71	70	74	75	67	77.3	90.428	25031000000	1328900000	1075700000	390190000	2782600000	2166200000	2.1388e+09	6.4878e+09	4483900000	4.1773e+09	49	316540000	18924000	14765000	5927600	0.160383	0.187645	0.0832686	3	0.143765	0.0442017	38688000	27903000	29501000	0.310671	0.322625	0.416176	3	0.349824	0.0471709
P161_RS0107210	P161_RS0107210	1396	hypothetical protein			24	24	24	13	14	13	9	10	14	15	13	10	49.9	53.616	469090000	46835000	39128000	42791000	46267000	23468000	54898000	75687000	53865000	86149000	20	17018000	1958500	1326900	1801900	0.0165985	0.0168632	0.0253124	3	0.0195914	0.00404682	1628400	1017300	1899000	0.0130763	0.0117624	0.0267895	3	0.0172094	0.00679536
P161_RS0107215	P161_RS0107215	1397	methionine--tRNA ligase			58	58	58	42	38	25	34	34	31	37	42	37	73.2	77.931	1.9651e+09	297690000	184310000	36297000	137900000	111270000	87278000	573620000	349230000	187520000	39	20791000	3897000	2297900	499890	0.0330274	0.0292034	0.00702226	3	0.0230844	0.0114644	1810400	1317100	1301900	0.0145378	0.0152288	0.0183661	3	0.0160443	0.00166588
P161_RS0107220	P161_RS0107220	1398	hypothetical protein			3	3	3	2	1	0	1	1	1	1	0	0	12.1	23.763	2806600	384660	308740	0	455230	526300	78833	1052800	0	0	12	233880	32055	25728	0	0.000271669	0.000326971	0	2	0.00029932	0.000142895	37936	43858	6569.4	0.000304632	0.000507103	9.26757e-05	3	0.00030147	0.000169204
P161_RS0107230;P161_RS18225	P161_RS0107230	1400	Uma2 family endonuclease			7	7	7	2	2	1	1	1	3	5	3	2	43.7	23.367	49064000	2046100	0	411490	0	1510300	1106300	21004000	15109000	7876700	11	2833800	186010	0	37408	0.00157645	0	0.000525493	2	0.00105097	0.000655393	0	137300	100570	0	0.00158752	0.00141876	2	0.00150314	0.000711927
P161_RS0107235	P161_RS0107235	1401	LD-carboxypeptidase			16	16	16	5	9	5	9	7	7	7	9	6	38.2	35.577	133280000	5610200	8009700	4774900	13919000	3646100	7343800	38279000	28466000	23234000	16	2878800	124390	223100	67276	0.00105422	0.00283532	0.000945067	3	0.00161153	0.000866494	308080	114730	311300	0.00247393	0.00132655	0.00439156	3	0.00273068	0.00126439
P161_RS0107250	P161_RS0107250	1404	serine hydrolase			7	7	7	1	3	2	2	1	2	1	2	1	12.4	80.757	63727000	0	1796700	668640	417300	186830	903830	1956200	57797000	0	41	1458600	0	11510	16308	0	0.000146278	0.000229088	2	0.000187683	9.47138e-05	10178	4556.8	6385.5	8.1731e-05	5.26875e-05	9.00813e-05	3	7.48333e-05	1.60262e-05
P161_RS0107255	P161_RS0107255	1405	AraC family transcriptional regulator	TR|AraC		5	5	5	4	2	1	2	1	2	2	3	2	10.8	45.646	25200000	1114600	273690	0	1326200	335200	203640	4636900	11160000	6150000	18	1400000	61922	15205	0	0.000524795	0.000193236	0	2	0.000359016	0.000216713	73679	18622	11313	0.000591654	0.000215315	0.000159594	3	0.000322188	0.000191894
P161_RS0107265	P161_RS0107265	1407	redoxin domain-containing protein			32	32	32	23	21	24	25	25	22	25	24	27	57.4	52.657	3.4137e+09	219750000	97502000	305260000	261460000	209300000	131120000	588660000	519790000	1080800000	25	84544000	6446400	3222500	7043400	0.0546338	0.0409539	0.0989429	3	0.0648436	0.0247502	7752100	5588400	3800700	0.0622506	0.0646153	0.0536171	3	0.060161	0.00472684
P161_RS0107270	P161_RS0107270	1408	SDR family oxidoreductase			15	15	15	9	8	8	9	13	9	12	11	11	68.2	29.052	103310000	7356300	6619600	4441900	5548600	8995900	2829600	21259000	22552000	23705000	16	5668900	459770	413730	224010	0.00389659	0.00525799	0.00314681	3	0.00410046	0.000873859	346790	527620	176850	0.00278478	0.00610055	0.00249485	3	0.00379339	0.00163569
P161_RS0107280	P161_RS0107280	1410	CvpA family protein			3	3	3	3	2	3	1	3	2	2	2	2	23.1	18.689	30081000	6636600	1282000	999750	858600	2981200	576150	4128800	7559800	5058400	8	3760200	829580	160260	124970	0.00703077	0.0020367	0.00175553	3	0.00360767	0.00242322	107330	372650	72019	0.000861877	0.00430872	0.00101598	3	0.0020622	0.00158978
P161_RS0107285	P161_RS0107285	1411	LysR family transcriptional regulator	OCS|LysR		6	6	6	2	1	1	3	3	1	4	5	1	25.8	35.242	41793000	1727300	1062400	170860	3788700	2460100	259820	15433000	12518000	4372900	19	1639400	90911	55917	8992.7	0.000770479	0.000710635	0.000126326	3	0.000535813	0.00029058	199410	129480	13675	0.00160129	0.0014971	0.000192916	3	0.0010971	0.00064077
P161_RS0107295	P161_RS0107295	1413	carbonate dehydratase			13	13	13	9	10	4	8	9	7	7	9	8	47.4	24.625	186090000	15207000	14990000	2592200	29506000	14558000	5400200	32762000	33395000	37679000	13	8516200	768830	850390	82678	0.00651591	0.0108074	0.00116143	3	0.00616157	0.00394591	2084400	870540	394520	0.0167381	0.0100655	0.00556556	3	0.0107897	0.00458981
P161_RS0107310	P161_RS0107310	1416	SH3 domain-containing protein			11	11	11	7	7	6	11	6	6	9	6	7	35.9	29.204	317310000	20549000	18374000	5142600	25807000	22894000	7287500	86033000	68739000	62487000	12	22692000	1565400	1426000	392110	0.0132669	0.0181227	0.00550821	3	0.0122993	0.00519509	1611200	1652200	545590	0.0129382	0.0191034	0.00769673	3	0.0132461	0.00466183
P161_RS0107315	P161_RS0107315	1417	hypothetical protein			42	42	42	19	20	27	29	26	25	21	30	25	59.3	66.378	733410000	52148000	26784000	62123000	75383000	59352000	32818000	178420000	150040000	96341000	36	15742000	1076400	633630	1358600	0.00912259	0.00805264	0.0190851	3	0.0120868	0.00496779	1555200	1256300	707580	0.0124885	0.0145258	0.00998195	3	0.0123321	0.00185832
P161_RS0107320	P161_RS0107320	1418	tetratricopeptide repeat protein			12	12	12	7	5	5	5	4	5	5	7	4	35	30.414	75117000	5060300	11133000	2250600	4365600	3074300	2375500	19459000	22398000	5002000	12	2817800	196360	758540	124450	0.00166417	0.00964009	0.00174823	3	0.00435083	0.00374023	153080	45496	63247	0.00122926	0.000526043	0.000892236	3	0.000882512	0.000287168
P161_RS0107325	P161_RS0107325	1419	VWA domain-containing protein			22	22	22	12	13	12	12	9	13	15	12	14	48.9	39.616	263930000	18700000	15595000	24394000	18088000	12268000	11209000	84332000	52478000	26864000	19	10970000	849170	650320	1009700	0.00719679	0.00826475	0.0141839	3	0.00988181	0.00307311	794050	629250	494530	0.00637635	0.00727563	0.00697642	3	0.00687613	0.000373918
P161_RS0107330	P161_RS0107330	1420	four helix bundle protein			4	4	4	3	2	3	1	2	2	3	3	2	35.8	13.915	26456000	3326400	1160700	2655100	1370600	2776400	1039100	5533800	6589300	2004800	8	3307000	415790	145080	331890	0.00352386	0.00184378	0.00466226	3	0.0033433	0.0011577	171330	347050	129890	0.00137581	0.00401273	0.00183238	3	0.00240697	0.00115064
P161_RS0107335	P161_RS0107335	1421	VWA domain-containing protein			16	16	16	8	8	8	8	8	7	11	10	5	45.5	37.787	293450000	13776000	29301000	14750000	18471000	7142100	27548000	71801000	82845000	27820000	17	7208100	660560	613550	579940	0.00559831	0.00779745	0.00814677	3	0.00718084	0.00112807	741250	232950	269240	0.00595235	0.00269346	0.00379822	3	0.00414801	0.00135324
P161_RS0107340	P161_RS0107340	1422	hypothetical protein			8	8	8	6	5	6	5	4	5	5	6	4	27.2	34.982	367900000	36331000	27486000	22513000	31693000	13259000	27736000	102330000	68190000	38361000	18	19018000	1715900	1399300	1216800	0.0145424	0.0177833	0.0170931	3	0.016473	0.00139388	1617100	705720	1444700	0.0129856	0.00815981	0.0203806	3	0.013842	0.00502575
P161_RS0107345	P161_RS0107345	1423	DUF58 domain-containing protein			15	15	15	10	12	10	8	9	8	11	8	9	47.8	33.126	372440000	31533000	38168000	37020000	28802000	12246000	18480000	105020000	50136000	51041000	16	19069000	1660700	1994400	1740100	0.0140746	0.0253463	0.0244442	3	0.0212884	0.0051142	1576900	593970	866240	0.0126628	0.00686771	0.0122202	3	0.0105836	0.0026337
P161_RS0107350	P161_RS0107350	1424	MoxR family ATPase			35	35	35	33	29	27	24	25	23	33	30	29	84.8	36.93	8.5745e+09	882060000	670950000	932240000	963070000	232260000	296860000	2.106e+09	1.7093e+09	781860000	20	228110000	23085000	18337000	23856000	0.195647	0.23304	0.33512	3	0.254603	0.0589453	19220000	8309200	7550300	0.15434	0.0960742	0.106513	3	0.118976	0.0253666
P161_RS0107355	P161_RS0107355	1425	UDP-2,3-diacylglucosamine diphosphatase			5	5	5	4	3	2	4	1	3	3	3	3	20.8	30.042	39066000	4388300	3375900	1425200	4674800	282040	3140400	8889000	5504800	7385700	15	433690	101350	37255	29647	0.000858951	0.000473464	0.00041647	3	0.000582961	0.000196536	43256	18802	37152	0.000347353	0.000217396	0.00052411	3	0.000362953	0.0001257
P161_RS0107370	P161_RS0107370	1428	S41 family peptidase			2	2	2	1	1	1	0	0	0	0	2	1	3.6	58.465	6879500	1197300	222360	505170	0	0	0	0	4954700	0	20	343980	59863	11118	25259	0.000507344	0.000141296	0.000354829	3	0.00033449	0.000150129	0	0	0	0	0	0	0	0	0
P161_RS0107375	P161_RS0107375	1429	dCMP deaminase family protein			6	6	6	3	1	2	3	2	2	3	3	1	41.8	15.796	21833000	6623300	946520	1310700	3076300	2219900	851740	2196900	4608100	0	8	1866000	486000	118320	163840	0.00411889	0.0015037	0.00230156	3	0.00264138	0.00109436	275140	120790	67470	0.00220942	0.00139662	0.000951811	3	0.00151928	0.000520691
P161_RS0107385	P161_RS0107385	1431	DNA repair protein RadA			17	17	17	9	8	8	10	9	11	7	7	8	47.2	49.507	340180000	22845000	12591000	23009000	57526000	14235000	28764000	55171000	34106000	91933000	20	12355000	1096700	464660	1038400	0.00929463	0.00590524	0.014587	3	0.00992897	0.0035726	2153300	619500	980880	0.0172913	0.0071629	0.0138374	3	0.0127639	0.00420402
P161_RS0107400	P161_RS0107400	1434	flippase-like domain-containing protein			2	2	2	1	1	1	1	2	0	1	2	1	7.3	35.021	10004000	1184200	1342500	965640	769360	238630	0	2483700	1241600	1778600	10	1000400	118420	134250	96564	0.00100362	0.00170615	0.00135649	3	0.00135542	0.000286807	76936	23863	0	0.000617808	0.000275913	0	2	0.000446861	0.000252698
P161_RS0107405	P161_RS0107405	1435	aspartate 1-decarboxylase			7	7	7	6	6	4	6	5	5	7	6	4	43.1	12.726	236440000	25629000	9371000	6346300	15955000	18222000	6158400	64701000	73483000	16574000	7	11853000	1177800	575270	784130	0.00998196	0.00731096	0.0110152	3	0.00943602	0.00156073	391190	1369200	369030	0.00314132	0.0158312	0.00520597	3	0.0080595	0.0055597
P161_RS0107410	P161_RS0107410	1436	pantoate--beta-alanine ligase			21	21	21	12	7	8	10	14	10	14	13	9	66	32.616	227550000	8633800	11790000	9786300	27510000	11237000	18649000	58574000	53604000	27771000	16	10921000	451590	664640	556050	0.00382727	0.00844674	0.00781117	3	0.00669506	0.00204437	1438300	579100	1073800	0.0115498	0.00669578	0.0151483	3	0.0111313	0.00346338
P161_RS0107415	P161_RS0107415	1437	glycogen/starch synthase	CAZyme, single-domain, contains GT5 domain		22	22	22	16	11	12	15	14	13	16	13	15	70.3	31.121	1.9255e+09	154380000	220760000	176700000	206260000	49111000	102730000	432310000	233920000	349350000	17	50950000	3910400	5765200	5005800	0.033141	0.0732684	0.0703195	3	0.0589097	0.0182609	6662700	1871900	2927800	0.0535025	0.0216436	0.041303	3	0.0388164	0.0131247
P161_RS0107420	P161_RS0107420	1438	DUF4270 family protein			29	29	29	20	18	21	19	16	16	18	19	21	54.2	58.244	1.4872e+09	182810000	86833000	129370000	94100000	85978000	67221000	363430000	245600000	231870000	24	46468000	6060200	2742500	4192000	0.0513608	0.0348537	0.0588876	3	0.0483674	0.0100375	2749900	3311700	2379800	0.0220821	0.0382912	0.0335722	3	0.0313152	0.00680705
P161_RS0107425	P161_RS0107425	1439	glutamine--fructose-6-phosphate transaminase (isomerizing)			54	54	50	38	33	38	41	35	37	40	43	37	81.7	68.314	6.7876e+09	604020000	369650000	613640000	437050000	444740000	426550000	2.0196e+09	1111100000	761220000	33	116680000	10962000	6622100	9672800	0.092904	0.0841586	0.13588	3	0.104314	0.022604	8533800	7553300	8582200	0.0685278	0.0873342	0.121071	3	0.0923108	0.0217372
P161_RS0107430	P161_RS0107430	1440	hypothetical protein	CAZyme, multi-domain, contains two PL6 domains		45	45	45	36	39	26	20	22	23	14	13	15	67.6	87.288	1.0172e+09	322170000	276750000	117720000	40557000	26561000	56361000	76870000	49127000	51134000	46	9359800	3172500	2187400	908140	0.0268872	0.0277991	0.0127572	3	0.0224812	0.00688596	451440	399060	386440	0.00362513	0.00461409	0.00545158	3	0.0045636	0.000746496
P161_RS0107455	P161_RS0107455	1443	RagB/SusD family nutrient uptake outer membrane protein	SusD-like		16	16	16	15	12	12	0	0	0	0	0	0	67.6	47.637	828430000	550320000	183560000	94544000	0	0	0	0	0	0	14	12316000	6496300	3663000	2156300	0.0550567	0.0465521	0.0302909	3	0.0439666	0.0102746	0	0	0	0	0	0	0	0	0
P161_RS0107460	P161_RS0107460	1444	TonB-dependent receptor	SusC-like		56	56	55	45	46	44	1	0	0	2	3	1	62.9	115.59	1.4736e+09	733960000	391920000	331880000	1433100	0	0	4311000	4909200	5208900	45	17727000	8229500	4830500	4519300	0.0697458	0.0613896	0.0634854	3	0.0648736	0.00354982	31847	0	0	0.000255736	0	0	1	0	0
P161_RS0107465	P161_RS0107465	1445	T9SS type A sorting domain-containing protein			21	21	21	19	17	18	5	5	3	10	3	4	62.4	41.471	262310000	63946000	88532000	59767000	2548300	1789900	2068900	35664000	3309500	4687600	20	8803500	2141300	2861300	2025600	0.0181477	0.0363635	0.0284548	3	0.0276554	0.00745803	127410	83259	89340	0.00102312	0.000962673	0.00126033	3	0.00108204	0.000128464
P161_RS0107470	P161_RS0107470	1446	type II toxin-antitoxin system HigB family toxin			2	2	2	0	0	0	0	0	0	1	0	1	29.9	11.748	957640	0	0	0	0	0	0	957640	0	0	5	191530	0	0	0	0	0	0	0	0	0	0	0	0	0	0	0	0	0	0
P161_RS0107480	P161_RS0107480	1448	Gfo/Idh/MocA family oxidoreductase	*		7	7	7	0	2	1	3	3	3	2	3	1	27.1	36.279	16525000	0	331590	646050	1381800	402440	573540	6866900	4291800	2031100	18	109240	0	18422	35892	0	0.00023412	0.000504197	2	0.000369159	0.000206012	28038	13143	4592.6	0.00022515	0.000151965	6.47886e-05	3	0.000147301	6.55501e-05
P161_RS0107485	P161_RS0107485	1449	hypothetical protein			25	25	25	8	7	8	15	13	14	12	8	7	34.4	92.38	177810000	9855600	3550800	5233600	20014000	15718000	13939000	66337000	20194000	22970000	41	2373500	168360	64692	89139	0.00142687	0.000822154	0.00125219	3	0.00116707	0.000254104	327900	215210	212670	0.00263309	0.00248834	0.00300017	3	0.0027072	0.000215425
P161_RS0107490	P161_RS0107490	1450	DUF4957 domain-containing protein	CAZyme, multi-domain, contains two PL6 domains	alginate	44	44	44	37	37	32	9	9	5	5	6	3	64.1	84.714	970490000	391790000	314650000	233580000	8455300	3324900	1678100	8424700	6023500	2547900	38	15198000	6214700	4705200	3765400	0.0526702	0.0597972	0.0528949	3	0.0551207	0.00330802	180100	71084	44160	0.00144623	0.000821901	0.000622973	3	0.000963702	0.000350732
P161_RS0107495	P161_RS0107495	1451	polysaccharide lyase family 7 protein	CAZyme, single-domain, contains PL7_5 domain	alginate	22	22	22	16	19	17	1	1	0	0	2	1	49.4	38.119	263080000	95426000	84271000	67241000	96437	279280	0	0	2245600	13521000	17	7471400	3043600	2356800	2049000	0.0257948	0.029952	0.0287836	3	0.0281768	0.00175056	5672.8	16428	0	4.55535e-05	0.000189947	0	2	0.00011775	8.09694e-05
P161_RS0107500	P161_RS0107500	1452	NADP-dependent phosphogluconate dehydrogenase		alginate	19	19	19	12	11	10	0	1	0	0	0	0	42.4	70.603	72853000	39282000	20342000	12182000	0	1047800	0	0	0	0	33	1477500	758150	441020	278310	0.00642539	0.00560481	0.00390959	3	0.00531326	0.00104756	0	31751	0	0	0.000367117	0	1	0	0
P161_RS0107510	P161_RS0107510	1454	polysaccharide lyase family 7 protein	CAZyme, single-domain, contains PL7_5 domain	alginate	18	18	18	15	13	14	2	1	1	1	1	0	48.4	40.843	68613000	25176000	20829000	20643000	757910	340530	149220	0	718620	0	22	2526700	972230	735890	735860	0.00823974	0.00935224	0.0103371	3	0.00930968	0.000856762	27787	15479	6782.8	0.000223134	0.000178974	9.56861e-05	3	0.000165931	5.28414e-05
P161_RS0107515	P161_RS0107515	1455	SDR family oxidoreductase		alginate	13	13	13	13	10	11	1	5	0	3	2	4	63.7	26.789	432850000	141090000	157910000	122750000	377180	1467100	0	3647600	925910	4688300	15	18028000	6650000	6302100	4385200	0.0563594	0.0800918	0.0616016	3	0.0660176	0.0101795	25145	97810	0	0.000201918	0.00113092	0	2	0.000666418	0.000492475
P161_RS0107520	P161_RS0107520	1456	T9SS type A sorting domain-containing protein		alginate	11	11	11	6	11	7	1	1	0	3	3	2	41.5	33.453	282800000	73986000	151050000	52459000	501670	266600	0	1741400	738420	2059500	10	21914000	5933900	11689000	3899800	0.0502903	0.148552	0.0547829	3	0.0845419	0.0452995	50167	26660	0	0.000402849	0.000308253	0	2	0.000355551	0.000172
P161_RS0107525	P161_RS0107525	1457	alginate lyase family protein	CAZyme, single-domain, contains PL17_2 domain	alginate	53	53	53	44	47	37	1	1	3	4	5	8	65.9	85.684	1154900000	489450000	374320000	225500000	4517700	6472500	2188600	20268000	18647000	13506000	45	12209000	5174400	3529200	2281100	0.0438535	0.0448517	0.032044	3	0.0402497	0.00581662	100390	143830	48635	0.000806148	0.00166302	0.000686102	3	0.00105176	0.000434997
P161_RS0107530	P161_RS0107530	1458	cupin domain-containing protein		alginate	9	9	9	9	8	6	0	0	0	0	1	0	50	13.856	122140000	62275000	44394000	15105000	0	0	0	0	366470	0	5	19238000	10541000	5930000	2767800	0.0893359	0.0753628	0.038881	3	0.0678599	0.0212704	0	0	0	0	0	0	0	0	0
P161_RS0107535	P161_RS0107535	1459	SusC/RagA family TonB-linked outer membrane protein	SusC-like	alginate	92	92	92	80	82	87	25	27	25	15	18	15	86.1	119.6	12020000000	4931000000	3.0833e+09	3.7385e+09	51055000	23224000	34578000	33882000	63473000	60513000	54	121540000	48920000	29897000	39368000	0.414602	0.379953	0.553026	3	0.449194	0.0747709	735120	287670	457540	0.00590313	0.00332615	0.0064546	3	0.00522796	0.0013635
P161_RS0107540	P161_RS0107540	1460	RagB/SusD family nutrient uptake outer membrane protein	SusD-like	alginate	43	43	43	36	40	35	8	3	6	3	10	7	63.7	59.254	4.0621e+09	1.5524e+09	1.0209e+09	1432300000	5408200	4452300	4633200	18230000	15525000	8354700	20	109830000	43045000	28538000	35749000	0.36481	0.362682	0.502188	3	0.409893	0.0652679	220350	222620	200110	0.00176945	0.00257402	0.00282299	3	0.00238882	0.000449601
P161_RS0107545	P161_RS0107545	1461	hypothetical protein			24	24	24	21	22	19	1	3	4	2	1	2	54.4	42.811	1.5522e+09	772720000	456400000	308850000	1170300	1761000	679520	8064700	0	2553100	12	58839000	25390000	17003000	15353000	0.215183	0.216087	0.215673	3	0.215647	0.000369567	97525	146750	56627	0.000783141	0.00169678	0.000798847	3	0.00109292	0.00042704
P161_RS19070	P161_RS19070	1462	PKD domain-containing protein	*		16	16	16	13	13	12	1	2	2	0	1	1	47.6	54.355	1.6824e+09	637760000	323050000	715870000	543310	1266700	1312200	0	1120700	1467900	12	69048000	33149000	16319000	19172000	0.280941	0.207394	0.269321	3	0.252552	0.0322819	45276	105560	41488	0.000363573	0.00122053	0.000585278	3	0.000723126	0.000363174
P161_RS0107555	P161_RS0107555	1463	FadR family transcriptional regulator	TR|GntR		23	23	23	19	17	12	9	11	7	13	13	13	88	26.777	432750000	39543000	56889000	32551000	16122000	15486000	10745000	100460000	62477000	98479000	12	8947000	1081100	1445700	801710	0.00916242	0.018373	0.0112621	3	0.0129325	0.00394136	755390	165200	205340	0.0060659	0.00191011	0.00289677	3	0.00362426	0.00177287
P161_RS0107560	P161_RS0107560	1464	MFS transporter			9	9	9	9	9	8	2	2	2	0	1	0	23.1	46.883	343930000	129160000	117330000	92195000	2500100	233930	0	0	2511700	0	14	23446000	8887800	7897400	6286300	0.0753249	0.100366	0.0883075	3	0.0879995	0.0102253	178580	16709	0	0.00143403	0.000193196	0	2	0.000813611	0.000635384
P161_RS0107565	P161_RS0107565	1465	SDR family oxidoreductase			24	24	24	24	23	23	13	14	9	17	17	17	98	26.644	7.6286e+09	2483400000	3.0483e+09	1.6391e+09	35109000	23386000	32015000	125310000	111790000	130200000	14	199950000	78376000	67936000	41769000	0.664244	0.863381	0.586755	3	0.704793	0.116515	558850	746110	475040	0.00448765	0.00862682	0.00670147	3	0.00660531	0.00169117
P161_RS0107570	P161_RS0107570	1466	DMT family transporter			2	2	2	2	0	1	0	1	0	1	1	1	8	31.157	30341000	2022700	0	973380	0	553500	0	3518300	5049100	18224000	11	2758300	183880	0	88489	0.0015584	0	0.00124306	2	0.00140073	0.000672743	0	50318	0	0	0.000581796	0	1	0	0
P161_RS0107595	P161_RS0107595	1471	threonylcarbamoyl-AMP synthase			13	13	13	3	4	6	5	5	6	6	5	4	47.8	35.655	80535000	2968300	7988700	16930000	2603800	2281300	2966200	18639000	18346000	7810800	15	4165300	197880	514760	1060200	0.00167705	0.00654195	0.0148933	3	0.00770409	0.00545772	161750	144100	175990	0.00129888	0.00166614	0.00248272	3	0.00181591	0.000494769
P161_RS0107600	P161_RS0107600	1472	RluA family pseudouridine synthase			10	10	10	2	1	0	5	2	3	3	3	1	19.2	64.285	41656000	1514700	178370	0	1846700	642360	4791800	5414900	9838000	17429000	33	1175200	45899	5405	0	0.000388998	6.86908e-05	0	2	0.000228845	0.000169521	55962	6041.6	145200	0.000449384	6.98553e-05	0.00204836	3	0.000855867	0.000857338
P161_RS0107605	P161_RS0107605	1473	hypothetical protein			31	31	31	13	13	12	20	24	22	26	23	24	82.3	27.317	2618500000	117600000	97216000	99789000	216840000	144970000	104060000	849470000	631490000	357110000	13	120210000	6679600	5162000	4970200	0.0566102	0.0656025	0.0698194	3	0.0640107	0.00550885	11899000	8562200	6191800	0.0955509	0.0989995	0.0873488	3	0.0939664	0.00488656
P161_RS0107610	P161_RS0107610	1474	hypothetical protein			8	8	8	0	0	0	1	6	3	3	6	4	69.3	14.976	27169000	0	0	0	1258700	2783000	581700	4413600	13068000	5064400	8	994510	0	0	0	0	0	0	0	0	0	157340	118340	34789	0.00126347	0.00136829	0.000490774	3	0.00104084	0.000391305
P161_RS0107615	P161_RS0107615	1475	DNA polymerase I			59	59	59	40	39	34	40	43	42	38	41	39	62.7	107.38	2528500000	164950000	86105000	75848000	248010000	130170000	258780000	435830000	548950000	579900000	51	25247000	2049900	1048300	1010200	0.0173731	0.0133226	0.0141909	3	0.0149622	0.00174123	2487600	1482500	2206000	0.0199758	0.0171412	0.0311204	3	0.0227458	0.00603374
P161_RS0107620	P161_RS0107620	1476	sterol desaturase family protein			3	3	3	3	2	1	2	2	2	3	3	3	12	32.367	32563000	1347900	1589000	372040	928780	626570	397410	8817600	8340600	10144000	11	2960300	122540	144450	33822	0.00103854	0.00183578	0.000475118	3	0.00111648	0.000558214	84434	56961	36128	0.000678018	0.000658605	0.000509664	3	0.000615429	7.52061e-05
P161_RS0107625	P161_RS0107625	1477	metallophosphoesterase			5	5	5	2	3	4	0	0	1	0	1	0	15.7	46.859	9577300	2311400	2421800	3324800	0	0	516340	0	1003000	0	19	476890	121650	127460	174990	0.00103099	0.00161986	0.00245819	3	0.00170301	0.00058561	0	0	27176	0	0	0.000383377	1	0	0
P161_RS0107630	P161_RS0107630	1478	thioredoxin family protein			6	6	6	3	4	4	2	2	3	3	1	3	49.5	11.042	36512000	6410400	3686900	1685300	2031600	3139200	890410	9739600	2503100	6425600	5	3584200	644560	531000	185890	0.00546271	0.00674834	0.00261131	3	0.00494079	0.00172879	406310	370050	35171	0.00326273	0.00427866	0.000496163	3	0.00267919	0.00159838
P161_RS0107635	P161_RS0107635	1479	DUF5615 family PIN-like protein			5	5	5	2	1	1	0	0	1	2	1	0	24.6	13.286	4851200	3308700	206680	258000	0	0	0	707860	369910	0	8	471680	413590	25835	32250	0.00350521	0.00032833	0.000453035	3	0.00142886	0.00146909	0	0	0	0	0	0	0	0	0
P161_RS0107645	P161_RS0107645	1481	universal stress protein			24	24	24	19	17	19	22	18	16	17	20	19	89.7	29.676	2.0483e+09	195620000	224080000	174340000	215590000	63874000	155210000	329410000	345630000	344550000	15	67697000	7173600	8559200	5305700	0.0607969	0.108777	0.0745324	3	0.0813687	0.0201753	5059400	2787700	3321500	0.0406278	0.0322325	0.046857	3	0.0399057	0.00599222
P161_RS0107655	P161_RS0107655	1483	hypothetical protein			2	2	2	2	0	0	0	0	1	0	0	0	18.8	18.076	11801000	11750000	0	0	0	0	51595	0	0	0	11	34032	29342	0	0	0.000248676	0	0	1	0	0	0	0	4690.4	0	0	6.61683e-05	1	0	0
P161_RS0107660	P161_RS0107660	1484	GHKL domain-containing protein	HK|Classic		30	30	30	15	16	22	20	19	15	15	16	17	63	53.601	1.504e+09	143270000	47340000	206530000	139400000	75361000	53707000	259090000	195220000	384090000	26	40584000	4764400	1605400	6054500	0.0403787	0.0204026	0.0850513	3	0.0486109	0.027027	4309000	2274300	1660200	0.034602	0.0262963	0.0234207	3	0.0281063	0.00474075
P161_RS0107665	P161_RS0107665	1485	hypothetical protein			25	25	25	15	16	15	14	16	15	14	16	16	97.7	27.632	2457200000	272050000	286750000	174230000	342650000	138340000	155520000	404050000	340060000	343510000	13	117200000	14227000	13863000	10142000	0.120575	0.176181	0.142471	3	0.146409	0.0228713	15839000	8153900	4698200	0.12719	0.0942786	0.0662783	3	0.0959155	0.0248939
P161_RS0107675	P161_RS0107675	1487	flavin mononucleotide-binding protein			5	5	5	2	3	2	1	2	1	2	2	1	40	17.382	30324000	2934800	4299900	1732400	1576800	3122100	1078900	7092900	5975800	2510700	10	2950600	293480	348210	173240	0.00248727	0.00442531	0.00243361	3	0.0031154	0.000926509	157680	312210	107890	0.0012662	0.00360989	0.00152202	3	0.0021327	0.00104974
P161_RS0107680	P161_RS0107680	1488	PAS domain S-box protein	HK|Classic		23	23	23	8	11	11	13	13	15	17	15	15	55.8	47.416	780400000	28998000	18044000	26036000	99281000	35310000	67219000	179730000	108190000	217590000	23	19768000	1082900	591620	974750	0.00917768	0.00751875	0.0136929	3	0.0101298	0.00260895	2843000	1169100	1954300	0.0228297	0.0135176	0.0275696	3	0.0213057	0.00583708
P161_RS0107685	P161_RS0107685	1489	response regulator	RR|Crp		27	27	27	10	13	11	20	20	16	20	21	19	72.8	39.922	839290000	28602000	23867000	17158000	98042000	36737000	23666000	278660000	214600000	117950000	21	22606000	1133700	867180	690220	0.00960821	0.0110208	0.00969594	3	0.0101083	0.0006462	2543400	1472400	962340	0.0204239	0.0170245	0.0135759	3	0.0170081	0.00279571
P161_RS0107690	P161_RS0107690	1490	universal stress protein			4	4	4	2	1	1	1	1	1	1	1	1	21.1	32.404	3284300	1167300	680920	0	0	216280	0	1007500	212300	0	17	180710	68667	40054	0	0.000581959	0.000509036	0	2	0.000545498	0.000258868	0	12722	0	0	0.000147097	0	1	0	0
P161_RS0107695	P161_RS0107695	1491	ribosome-associated translation inhibitor RaiA			6	6	6	3	4	3	3	2	1	3	3	1	61	11.381	49108000	6074600	2939900	805390	1549300	2579900	221170	9981900	21840000	3116300	6	3283700	527200	165760	134230	0.00446807	0.0021066	0.00188561	3	0.00282009	0.00116878	258210	114790	36862	0.00207347	0.00132725	0.000520019	3	0.00130691	0.000634356
P161_RS0107700	P161_RS0107700	1492	universal stress protein			7	7	7	0	2	3	3	2	2	3	3	4	43.2	31.957	30376000	0	1448900	733030	7175800	5195400	1619500	5984700	3229200	4989000	12	934370	0	80360	41424	0	0.00102127	0.000581908	2	0.000801591	0.000418285	501770	52920	85282	0.00402929	0.000611882	0.00120309	3	0.00194809	0.0014913
P161_RS0107705	P161_RS0107705	1493	gliding motility lipoprotein GldD			7	7	7	4	3	4	5	2	2	1	5	0	37.8	21.727	26162000	3611500	3292900	1209600	6935000	1209300	351130	1455500	8097400	0	14	786530	86333	167830	53773	0.00073168	0.00213291	0.000755382	3	0.00120666	0.00065503	203550	86381	25081	0.00163454	0.000998771	0.000353822	3	0.000995711	0.000522855
[truncated: 1,455 more rows]
[truncated: 12 more columns]

## Sheet: Annotation_Polaribacter
organism		strand	locus_tag	order	name	symbol	GeneID	locus_tag	locus_tag (Kappelmann)	feature_interval_length	product_length	attributes	annotation (abb.)	annotation (full)	domain architecture	comment	HTCS type	HTCS InterPro	Hmmer	HotPep	CUPP	Blast
[truncated: 3,458 more rows]

## Sheet: proteinGroups_Muricauda
Protein IDs	Majority protein IDs	Annotation	PUL annotation	PUL	Razor + unique peptides	Razor + unique peptides Ex1	Razor + unique peptides Ex2	Razor + unique peptides Ex3	Razor + unique peptides G1	Razor + unique peptides G2	Razor + unique peptides G3	Razor + unique peptides X1	Razor + unique peptides X2	Razor + unique peptides X3	Mol. weight [kDa]	Intensity	Intensity Ex1	Intensity Ex2	Intensity Ex3	Intensity G1	Intensity G2	Intensity G3	Intensity X1	Intensity X2	Intensity X3	iBAQ peptides	iBAQ	iBAQ E1	iBAQ E2	iBAQ E3	riBAQ [%] E1	riBAQ [%] E2	riBAQ [%] E3	# identified	mean (no 0)	SD	iBAQ G1	iBAQ G2	iBAQ G3	riBAQ [%] G1	riBAQ [%] G2	riBAQ [%] G3	# identified	mean (no 0)	SD	iBAQ X1	iBAQ X2	iBAQ X3	riBAQ [%] X1
[truncated: 2,805 more rows]
[truncated: 6 more columns]

[truncated: 1 more sheets: Annotation_Muricauda]
