# Supplementary material for: Alpha-glucans from bacterial necromass indicate an intra-population loop within the marine carbon cycle
Source: Research Square preprint supplement (doi:10.21203/rs.3.rs-3205445/v1), 2023-08-14
Supplement: Supplementary file 4 [file ba4dd38a0cdd304eb4169368.xlsx]

## Sheet: Tabelle1
	Table S2 List of all isolate and MAG-encoded PUL-associated GH13
	GH13s from North Sea isolates and Helgoland 2020 metagenomes included in the GH13 analysis. GH13s had to be PUL associated to be considered (e.g. be coded close to a susC/D pair).
	MAG-sequences only include those of the top 50 expressed MAGs as detected by metatranscriptomics (for further information see Sidhu et al., Microbiome, 2023).
	Isolate Name	annotation	locus tag
	01_Polaribacter_sp._KT25b	T9SS type A sorting domain-containing protein	BLT70_RS09360
	01_Polaribacter_sp._KT25b	glycoside hydrolase family 13 protein	BLT70_RS09320
	01_Polaribacter_sp._KT25b	alpha-amylase	BLT70_RS09300
	01_Polaribacter_sp._KT25b	alpha-amylase	BLT70_RS09305
	02_Polaribacter_sp._Hel1_85	T9SS type A sorting domain-containing protein	PHEL85_RS04540
	02_Polaribacter_sp._Hel1_85	glycoside hydrolase family 13 protein	PHEL85_RS04495
	02_Polaribacter_sp._Hel1_85	alpha-amylase	PHEL85_RS04480
	02_Polaribacter_sp._Hel1_85	alpha-amylase	PHEL85_RS04485
	03_Polaribacter_sp._Hel1_33_49_translated_cds	T9SS type A sorting domain-containing protein	PHEL49_RS01740
	03_Polaribacter_sp._Hel1_33_49_translated_cds	glycoside hydrolase family 13 protein	PHEL49_RS01785
	03_Polaribacter_sp._Hel1_33_49_translated_cds	alpha-amylase	PHEL49_RS01805
	03_Polaribacter_sp._Hel1_33_49_translated_cds	alpha-amylase	PHEL49_RS01800
	05_Polaribacter_sp._Hel1_33_96	T9SS type A sorting domain-containing protein	ATE90_RS01785
	05_Polaribacter_sp._Hel1_33_96	glycoside hydrolase family 13 protein	ATE90_RS01830
	05_Polaribacter_sp._Hel1_33_96	alpha-amylase	ATE90_RS01845
	05_Polaribacter_sp._Hel1_33_96	alpha-amylase	ATE90_RS01850
	06_Polaribacter_sp._Hel_I_88	glycoside hydrolase family 13 protein	P161_RS0117455
	06_Polaribacter_sp._Hel_I_88	T9SS type A sorting domain-containing protein	P161_RS0117500
	06_Polaribacter_sp._Hel_I_88	alpha-amylase	P161_RS0117435
	06_Polaribacter_sp._Hel_I_88	alpha-amylase	P161_RS0117440
	07_Tenacibaculum_sp._MAR_2009_124	T9SS type A sorting domain-containing protein	BLW23_RS04905
	07_Tenacibaculum_sp._MAR_2009_124	alpha-amylase	BLW23_RS04845
	07_Tenacibaculum_sp._MAR_2009_124	glycoside hydrolase family 13 protein	BLW23_RS04860
	07_Tenacibaculum_sp._MAR_2009_124	alpha-amylase	BLW23_RS04850
	11_Sediminibacter_sp._Hel_I_10	glycoside hydrolase family 13 protein	P176_RS0111885
	11_Sediminibacter_sp._Hel_I_10	alpha-amylase	P176_RS0111900
	11_Sediminibacter_sp._Hel_I_10	T9SS type A sorting domain-containing protein	P176_RS0111840
	11_Sediminibacter_sp._Hel_I_10	alpha-amylase	P176_RS0111895
	11_Sediminibacter_sp._Hel_I_10	alpha-amylase	P176_RS0111905
	14_Lacinutrix_sp._Hel_I_90	T9SS type A sorting domain-containing protein	GQ46_RS11805
	14_Lacinutrix_sp._Hel_I_90	alpha-amylase	GQ46_RS11855
	14_Lacinutrix_sp._Hel_I_90	alpha-amylase	GQ46_RS11860
	15_Olleya_sp._Hel_I_94	T9SS type A sorting domain-containing protein	JM82_RS15255
	15_Olleya_sp._Hel_I_94	alpha-amylase	JM82_RS15295
	15_Olleya_sp._Hel_I_94	alpha-amylase	JM82_RS15305
	15_Olleya_sp._Hel_I_94	alpha-amylase	JM82_RS15310
	16_Winogradskyella_sp._RHA_55	alpha-amylase	BLT74_RS05640
	16_Winogradskyella_sp._RHA_55	alpha-amylase	BLT74_RS05645
	16_Winogradskyella_sp._RHA_55	glycoside hydrolase family 13 protein	BLT74_RS05660
	16_Winogradskyella_sp._RHA_55	T9SS type A sorting domain-containing protein	BLT74_RS05705
	17_Psychroserpens_sp._Hel_I_66	T9SS type A sorting domain-containing protein	GQ40_RS15820
	17_Psychroserpens_sp._Hel_I_66	glycoside hydrolase family 13 protein	GQ40_RS15860
	17_Psychroserpens_sp._Hel_I_66	alpha-amylase	GQ40_RS15875
	17_Psychroserpens_sp._Hel_I_66	alpha-amylase	GQ40_RS15880
	17_Psychroserpens_sp._Hel_I_66	alpha-amylase	GQ40_RS15885
	18_Flavobacteriaceae_bacterium_MAR_2010_105	1,4-alpha-glucan branching protein GlgB	NA63_RS11845
	18_Flavobacteriaceae_bacterium_MAR_2010_105	alpha-amylase	NA63_RS01900
	18_Flavobacteriaceae_bacterium_MAR_2010_105	T9SS type A sorting domain-containing protein	NA63_RS01960
	18_Flavobacteriaceae_bacterium_MAR_2010_105	alpha-1,4-glucan--maltose-1-phosphate maltosyltransferase	NA63_RS11855
	18_Flavobacteriaceae_bacterium_MAR_2010_105	alpha-amylase	NA63_RS01915
	18_Flavobacteriaceae_bacterium_MAR_2010_105	alpha-amylase	NA63_RS01905
	19_Flavobacteriaceae_bacterium_sp._MAR_2010_119	1,4-alpha-glucan branching enzyme	Ga0052906_0063
	19_Flavobacteriaceae_bacterium_sp._MAR_2010_119	alpha-1,4-glucan:maltose-1-phosphate maltosyltransferase	Ga0052906_0065
	19_Flavobacteriaceae_bacterium_sp._MAR_2010_119	Beta-galactosidase C-terminal domain-containing protein	Ga0052906_0935
	19_Flavobacteriaceae_bacterium_sp._MAR_2010_119	Glycosidase	Ga0052906_0936
	19_Flavobacteriaceae_bacterium_sp._MAR_2010_119	Glycosidase	Ga0052906_0938
	19_Flavobacteriaceae_bacterium_sp._MAR_2010_119	Por secretion system C-terminal sorting domain-containing protein	Ga0052906_0947
	20_Flavobacteriaceae bacterium MAR_2010_188	1,4-alpha-glucan branching protein GlgB	BLR38_RS05960
	20_Flavobacteriaceae bacterium MAR_2010_188	alpha-1,4-glucan--maltose-1-phosphate maltosyltransferase	BLR38_RS05970
	20_Flavobacteriaceae bacterium MAR_2010_188	alpha-glucosidase	BLR38_RS13830
	20_Flavobacteriaceae bacterium MAR_2010_188	glycoside hydrolase family 13 protein	BLR38_RS15225
	20_Flavobacteriaceae bacterium MAR_2010_188	alpha-amylase	BLR38_RS15230
	20_Flavobacteriaceae bacterium MAR_2010_188	alpha-amylase	BLR38_RS15235
	26_Dokdonia_sp._Hel_I_63	alpha-amylase	JM84_RS01015
	27_Aquimarina_sp._MAR_2010_214	alpha-amylase	ATE84_RS19950
	27_Aquimarina_sp._MAR_2010_214	glycoside hydrolase family 13 protein	ATE84_RS19955
	27_Aquimarina_sp._MAR_2010_214	alpha-amylase	ATE84_RS19995
	28_Muricauda_sp._MAR_2010_75	alpha-amylase	FG28_RS04360
	30_Zobellia_uliginosa_MAR_2009_138	glycoside hydrolase family 13 protein	FG20_RS06320
	30_Zobellia_uliginosa_MAR_2009_138	alpha-amylase	FG20_RS13300
	30_Zobellia_uliginosa_MAR_2009_138	DUF1939 domain-containing protein	FG20_RS21685
	31_Maribacter forsetii_DSM_18668	alpha-amylase	P177_RS17735
	32_Maribacter_dokdonensis_MAR_2009_71	alpha-amylase	BLW30_RS03515
	33_Maribacter_sp._MAR_2009_60	alpha-amylase	BLT83_RS18920
	34_Maribacter_sp._MAR_2009_72	alpha-amylase	JM81_RS09505
	35_Maribacter_sp._Hel_I_7	alpha-amylase	P178_RS21685
	36_Arenibacter_palladensis_MAR_2009_79	alpha-amylase	GQ41_RS19845
	37_Cellulophaga_sp._Hel_I_12	alpha-amylase	GQ45_RS08600
	38_Algibacter_sp._RHA_19	T9SS type A sorting domain-containing protein	AX016_RS15200
	38_Algibacter_sp._RHA_19	glycoside hydrolase family 13 protein	AX016_RS15240
	38_Algibacter_sp._RHA_19	alpha-amylase	AX016_RS15245
	39_Cellulophaga_sp._RHA_52	T9SS type A sorting domain-containing protein	JM80_RS14740
	39_Cellulophaga_sp._RHA_52	alpha-amylase	JM80_RS14780
	39_Cellulophaga_sp._RHA_52	alpha-amylase	JM80_RS14790
	41_Gramella_forsetii_KT0803	alpha-amylase	GFO_RS10025
	41_Gramella_forsetii_KT0803	glycoside hydrolase family 13 protein	GFO_RS10030
	41_Gramella_forsetii_KT0803	alpha-amylase	GFO_RS10070
	41_Gramella_forsetii_KT0803	1,4-alpha-glucan branching protein GlgB	GFO_RS14125
	42_Gramella_sp._MAR_2010_102	T9SS type A sorting domain-containing protein	BLT93_RS12225
	42_Gramella_sp._MAR_2010_102	glycoside hydrolase family 13 protein	BLT93_RS12265
	42_Gramella_sp._MAR_2010_102	alpha-amylase	BLT93_RS12270
	43_Gramella_sp._MAR_2010_147	alpha-amylase	BLT95_RS01080
	43_Gramella_sp._MAR_2010_147	glycoside hydrolase family 13 protein	BLT95_RS01120
	43_Gramella_sp._MAR_2010_147	alpha-amylase	BLT95_RS01125
	44_Gramella_sp._Hel_I_59	alpha-amylase	JM79_RS06045
	44_Gramella_sp._Hel_I_59	alpha-amylase	JM79_RS06085
	44_Gramella_sp._Hel_I_59	alpha-amylase	JM79_RS06090
	45_Salegentibacter_sp._Hel_I_6	alpha-amylase	FG27_RS15770
	45_Salegentibacter_sp._Hel_I_6	glycoside hydrolase family 13 protein	FG27_RS15810
	45_Salegentibacter_sp._Hel_I_6	alpha-amylase	FG27_RS15815
	46_Gillisia_sp._Hel_I_29	alpha-amylase	P163_RS04095
	46_Gillisia_sp._Hel_I_29	glycoside hydrolase family 13 protein	P163_RS04135
	46_Gillisia_sp._Hel_I_29	alpha-amylase	P163_RS04145
	47_Gillisia_sp._Hel1_33_143	alpha-amylase	BLT84_RS15570
	47_Gillisia_sp._Hel1_33_143	glycoside hydrolase family 13 protein	BLT84_RS15580
	47_Gillisia_sp._Hel1_33_143	alpha-amylase	BLT84_RS15620
	48_Gillisia_sp._Hel_I_86	alpha-amylase	JM83_RS01050
	48_Gillisia_sp._Hel_I_86	alpha-amylase	JM83_RS01060
	48_Gillisia_sp._Hel_I_86	alpha-amylase	JM83_RS01100
	49_Leeuwenhoekiella_sp._MAR_2009_132	glycoside hydrolase family 13 protein	P164_RS04835
	49_Leeuwenhoekiella_sp._MAR_2009_132	alpha-amylase	P164_RS04840
	50_Flavimarina_sp._Hel_I_48	T9SS type A sorting domain-containing protein	P162_RS13755
	50_Flavimarina_sp._Hel_I_48	glycoside hydrolase family 13 protein	P162_RS13780
	50_Flavimarina_sp._Hel_I_48	alpha-amylase	P162_RS13785
	52_Nonlabens_sp._Hel_I_38	Alpha amylase, catalytic domain	LY99DRAFT_0128
	52_Nonlabens_sp._Hel_I_38	Glycosidase	LY99DRAFT_0129
	52_Nonlabens_sp._Hel_I_38	Glycosidase	LY99DRAFT_0130
	52_Nonlabens_sp._Hel_I_38	Por secretion system C-terminal sorting domain-containing protein	LY99DRAFT_0138
	53_Nonlabens_sp._Hel1_33_55	T9SS type A sorting domain-containing protein	BLO34_RS13685
	53_Nonlabens_sp._Hel1_33_55	glycoside hydrolase family 13 protein	BLO34_RS13730
	53_Nonlabens_sp._Hel1_33_55	alpha-amylase	BLO34_RS13735
	metagenome-taxa (assigned with GTDB)	annotation	locus tag
	d__Bacteria;p__Bacteroidota;c__Bacteroidia;o__Flavobacteriales;f__Flavobacteriaceae;g__SCGC-AAA160-P02;s__	glycoside hydrolase family 13 protein	contig_9944_AB_MB169_21968-24973
	d__Bacteria;p__Bacteroidota;c__Bacteroidia;o__Flavobacteriales;f__Flavobacteriaceae;g__SCGC-AAA160-P02;s__	glycoside hydrolase family 13 protein	contig_6979_AI_MB94_113893-115566
	d__Bacteria;p__Bacteroidota;c__Bacteroidia;o__Flavobacteriales;f__Flavobacteriaceae;g__SCGC-AAA160-P02;s__	glycoside hydrolase family 13 protein	contig_6979_AI_MB94_116914-118347
	d__Bacteria;p__Bacteroidota;c__Bacteroidia;o__Flavobacteriales;f__Flavobacteriaceae;g__SCGC-AAA160-P02;s__	glycoside hydrolase family 13 protein	scaffold_5189_C_MB344_440847-443850
	d__Bacteria;p__Bacteroidota;c__Bacteroidia;o__Flavobacteriales;f__Flavobacteriaceae;g__SCGC-AAA160-P02;s__	glycoside hydrolase family 13 protein	scaffold_5189_C_MB344_443872-445296
	d__Bacteria;p__Bacteroidota;c__Bacteroidia;o__Flavobacteriales;f__Schleiferiaceae;g__UBA10364;s__UBA10364 sp003045825	glycoside hydrolase family 13 protein	contig_4087_D_MB74_267797-271409
	d__Bacteria;p__Bacteroidota;c__Bacteroidia;o__Flavobacteriales;f__Flavobacteriaceae;g__MAG-120531;s__MAG-120531 sp000173115	glycoside hydrolase family 13 protein	contig_5429_F_MB366_39151-40572
	d__Bacteria;p__Bacteroidota;c__Bacteroidia;o__Flavobacteriales;f__Schleiferiaceae;g__UBA10364;s__UBA10364 sp002387615	glycoside hydrolase family 13 protein	contig_8831_L_MB280_148799-152414
	d__Bacteria;p__Bacteroidota;c__Bacteroidia;o__Flavobacteriales;f__Flavobacteriaceae;g__Polaribacter;s__	glycoside hydrolase family 13 protein	contig_3674_P_MB288_18160-19821
	d__Bacteria;p__Bacteroidota;c__Bacteroidia;o__Flavobacteriales;f__Flavobacteriaceae;g__Polaribacter;s__	glycoside hydrolase family 13 protein	contig_3674_P_MB288_19824-21227
	d__Bacteria;p__Bacteroidota;c__Bacteroidia;o__Flavobacteriales;f__Flavobacteriaceae;g__Polaribacter;s__	alpha-amylase	contig_3674_P_MB288_39730-42519
	d__Bacteria;p__Bacteroidota;c__Bacteroidia;o__Flavobacteriales;f__Flavobacteriaceae;g__Polaribacter;s__	glycoside hydrolase family 13 protein	contig_3674_P_MB288_1652171-1653865
	d__Bacteria;p__Bacteroidota;c__Bacteroidia;o__Flavobacteriales;f__Flavobacteriaceae;g__Polaribacter;s__	glycoside hydrolase family 13 protein	contig_3674_P_MB288_1655228-1659754
	d__Bacteria;p__Bacteroidota;c__Bacteroidia;o__Flavobacteriales;f__Flavobacteriaceae;g__MAG-121220-bin8;s__MAG-121220-bin8 sp002700465	alpha-amylase	contig_982_W_MB115_644934-648417
	d__Bacteria;p__Bacteroidota;c__Bacteroidia;o__Flavobacteriales;f__Flavobacteriaceae;g__Polaribacter;s__Polaribacter sp900106075	alpha-amylase	contig_4556_X_MB188_1322906-1325701
	d__Bacteria;p__Bacteroidota;c__Bacteroidia;o__Flavobacteriales;f__Flavobacteriaceae;g__Polaribacter;s__Polaribacter sp900106075	alpha-amylase	contig_4556_X_MB188_1338854-1340788
	d__Bacteria;p__Bacteroidota;c__Bacteroidia;o__Flavobacteriales;f__Flavobacteriaceae;g__Polaribacter;s__Polaribacter sp900106075	glycoside hydrolase family 13 protein	contig_4556_X_MB188_1344202-1345614
	d__Bacteria;p__Bacteroidota;c__Bacteroidia;o__Flavobacteriales;f__Flavobacteriaceae;g__Polaribacter;s__Polaribacter sp900106075	glycoside hydrolase family 13 protein	contig_4556_X_MB188_1345617-1347272
	d__Bacteria;p__Proteobacteria;c__Gammaproteobacteria;o__Pseudomonadales;f__Halieaceae;g__Luminiphilus;s__Luminiphilus sp009886815	glycoside hydrolase family 13 protein	contig_5212_T_MB10_79027-80757
	d__Bacteria;p__Proteobacteria;c__Gammaproteobacteria;o__Enterobacterales;f__Alteromonadaceae;g__Glaciecola;s__Glaciecola sp002292215	alpha-amylase	contig_4672_Y_MB157_400841-402904
